# Supplementary material
Source: PubMed Central journal article supplement (PMC2689776)

## High vs low 2 table 12

| Control |                                | Sample |                                  | Delta Score  |
|---------|--------------------------------|--------|----------------------------------|--------------|
| Rank    | Pathway name                   | Rank   | Pathway name                     |              |
| 1       | stress-associated pathways     | 1      | stress-associated pathways       | 93771165,063 |
| 6       | EGF pathway                    | 4      | EGF pathway                      | 269804,608   |
| 2       | p38 pathway                    | 3      | p38 pathway                      | -149817,166  |
| 10      | JNK pathway                    | 2      | JNK pathway                      | 1867081,666  |
| 9       | Fas pathway                    | 6      | Fas pathway                      | 169730,209   |
| 4       | Epo pathway                    | 8      | Epo pathway                      | -63485,237   |
| 3       | RANKL pathway                  | 5      | RANKL pathway                    | -62731,089   |
| 11      | PRL pathway                    | 13     | PRL pathway                      | -39309,556   |
| 29      | Caspase network                | 28     | Caspase network                  | 13216,515    |
| 5       | BMP2 ---> p38alpha             | 7      | BMP2 ---> p38alpha               | -6249,200    |
| 18      | Apo2L pathway                  | 22     | Apo2L pathway                    | -6859,888    |
| 39      | TGFbeta pathway                | 47     | TGFbeta pathway                  | -4899,146    |
| 8       | TAK1 ---> ATF-2                | 11     | TAK1 ---> ATF-2                  | -2877,072    |
| 104     | T-cell antigen receptor pathwa | 99     | T-cell antigen receptor pathway  | 3464,226     |
| 12      | RANKL ---> MITF                | 12     | RANKL ---> MITF                  | -1951,387    |
| 80      | B-cell antigen receptor pathwa | 102    | B-cell antigen receptor pathway  | -2320,638    |
| 14      | Epo ---> ERK1                  | 16     | Epo ---> ERK1                    | -1417,552    |
| 125     | insulin pathway                | 106    | insulin pathway                  | 2465,758     |
| 7       | EGF ---> PAK1                  | 9      | EGF ---> PAK1                    | -930,261     |
| 77      | PDGF pathway                   | 50     | PDGF pathway                     | 4138,090     |
| 40      | alpha IIb beta3 pathway        | 45     | alpha IIb beta3 pathway          | -967,456     |
| 41      | alpha IIb beta3 ---> Rac1      | 46     | alpha IIb beta3 ---> Rac1        | -967,456     |
| 21      | EGF ---> ERK                   | 23     | EGF ---> ERK                     | -806,822     |
| 106     | IL-1 pathway                   | 122    | IL-1 pathway                     | -720,321     |
| 179     | E2F network                    | 155    | E2F network                      | 914,382      |
| 17      | ZAP-70 ---> c-Jun              | 19     | ZAP-70 ---> c-Jun                | -635,380     |
| 16      | wnt pathway                    | 15     | wnt pathway                      | 983,853      |
| 15      | JNK1 ---> MKK4                 | 10     | JNK1 ---> MKK4                   | 13019,663    |
| 27      | IL-1beta ---> c-Jun            | 33     | IL-1beta ---> c-Jun              | -497,299     |
| 124     | TLR3 pathway                   | 132    | TLR3 pathway                     | -496,264     |
| 46      | IL-1beta ---> Elk-1            | 51     | IL-1beta ---> Elk-1              | -455,364     |
| 19      | EGF ---> PI3K-C2beta           | 20     | EGF ---> PI3K-C2beta             | -365,482     |
| 20      | RANKL ---> JNK1                | 21     | RANKL ---> JNK1                  | -365,482     |
| 42      | RhoA ---> stress fiber formati | 85     | RhoA ---> stress fiber formation | -965,492     |
| 43      | RhoA pathway                   | 86     | RhoA pathway                     | -965,492     |
| 26      | Epo ---> IP3, PtsIns(3,4)P     | 29     | Epo ---> IP3, PtsIns(3,4)P       | -365,313     |
| 78      | IL-8 pathway                   | 17     | IL-8 pathway                     | 9444,529     |
| 192     | p53 pathway                    | 205    | p53 pathway                      | -202,057     |
| 13      | c-Cbl ---/ ErBB1               | 14     | c-Cbl ---/ ErBB1                 | -304,927     |
| 98      | neurotensin pathway            | 18     | neurotensin pathway              | 7986,684     |
| 47      | fMLP pathway                   | 43     | fMLP pathway                     | 491,192      |
| 198     | TLR4 pathway                   | 216    | TLR4 pathway                     | -234,011     |
| 24      | FasL ---> Caspase-3            | 26     | FasL ---> Caspase-3              | -266,208     |
| 25      | EGF ---> c-Fos                 | 27     | EGF ---> c-Fos                   | -266,208     |
| 38      | parkin associated pathways     | 30     | parkin associated pathways       | 418,138      |
| 127     | EDAR pathway                   | 133    | EDAR pathway                     | -225,875     |

|                                   |                                                |          |
|-----------------------------------|------------------------------------------------|----------|
| 158 IL-1beta ---> p50:RelA        | 180 IL-1beta ---> p50:RelA                     | -200,565 |
| 28 EDA-A2 ---> c-Jun              | 31 EDA-A2 ---> c-Jun                           | -200,410 |
| 96 LPS ---> p38                   | 101 LPS ---> p38                               | -192,575 |
| 123 Rac1 pathway                  | 130 Rac1 pathway                               | -181,013 |
| 154 IFN pathway                   | 177 IFN pathway                                | -160,446 |
| 101 BCR ---> c-Jun                | 107 BCR ---> c-Jun                             | -179,309 |
| 30 JIP-1 ---> APP                 | 34 JIP-1 ---> APP                              | -101,648 |
| 69 LAT ---> cofilin               | 76 LAT ---> cofilin                            | -109,977 |
| 117 BCR ---> p38                  | 123 BCR ---> p38                               | -93,210  |
| 197 LPS ---> NF-kappaB            | 200 LPS ---> NF-kappaB                         | -73,928  |
| 81 Aurora-A cell cycle regulation | 73 Aurora-A cell cycle regulation              | 129,989  |
| 82 PPAR pathway                   | 74 PPAR pathway                                | 129,989  |
| 83 Aurora-A activation, substrate | 75 substrates and degradation                  | 129,989  |
| 97 IFNgamma ---> STAT1alpha       | 42 IFNgamma ---> STAT1alpha                    | 1340,139 |
| 119 HIF-1alpha pathway            | 173 HIF-1alpha pathway                         | -203,872 |
| 44 Apo2L ---Caspase-8---> Casp    | 48 Apo2L ---Caspase-8---> Caspase-3            | -77,131  |
| 45 PRL ---IRS---> PI3K            | 49 PRL ---IRS---> PI3K                         | -77,131  |
| 181 G2/M phase (cyclin B:Cdk1)    | 184 G2/M phase (cyclin B:Cdk1)                 | -67,624  |
| 234 tuberin pathway               | 244 tuberin pathway                            | -56,400  |
| 150 BCR ---MLK3---> c-Jun         | 152 BCR ---MLK3---> c-Jun                      | -70,288  |
| 151 BCR ---> cytoskeletal reorgan | 153 BCR ---> cytoskeletal reorganization       | -70,288  |
| 152 insulin ---> glucose uptake   | 154 insulin ---> glucose uptake                | -70,288  |
| 182 G1 phase (Cdk2)               | 181 G1 phase (Cdk2)                            | 90,774   |
| 65 G-alpha-q ---> arachidonic aci | 110 G-alpha-q ---> arachidonic acid, ERK       | -249,620 |
| 246 VEGF-A pathway                | 234 VEGF-A pathway                             | 235,105  |
| 22 EGF ---> STAT1alpha            | 24 EGF ---> STAT1alpha                         | -66,510  |
| 23 ASK1 ---> p38alpha             | 25 ASK1 ---> p38alpha                          | -66,510  |
| 103 PRL ---PI3K---> AKT           | 109 PRL ---PI3K---> AKT                        | -68,365  |
| 153 Htt pathway                   | 156 Htt pathway                                | -61,628  |
| 205 TNF-alpha pathway             | 127 TNF-alpha pathway                          | 1312,457 |
| 66 TNF-alpha ---> c-Jun           | 70 TNF-alpha ---> c-Jun                        | -60,347  |
| 67 Caspase-9 ---> Caspases        | 71 Caspase-9 ---> Caspases                     | -60,347  |
| 68 PRL ---> PAK1                  | 72 PRL ---> PAK1                               | -60,347  |
| 178 IFNalpha, IFNbeta, IFNgamm    | 182 IFNalpha, IFNbeta, IFNgamma ---> Rap1      | -54,370  |
| 233 insulin ---> AKT-1 pathway    | 253 insulin ---> AKT-1 pathway                 | -61,546  |
| 105 cyclosome regulatory network  | 100 cyclosome regulatory network               | 87,891   |
| 235 S phase (Cdk2)                | 218 S phase (Cdk2)                             | 57,812   |
| 130 RANKL ---> AKT                | 134 RANKL ---> AKT                             | -49,497  |
| 131 dsRNA ---> IKK-alpha:IKK-b    | 135 dsRNA ---> IKK-alpha:IKK-beta{p}:IKK-gamma | -49,497  |
| 79 LAT ---> PKCtheta              | 32 LAT ---> PKCtheta                           | 1112,824 |
| 118 p73 pathway                   | 105 p73 pathway                                | 72,202   |
| 31 EGF ---> SHIP1                 | 35 EGF ---> SHIP1                              | -46,098  |

|                                    |                                      |          |
|------------------------------------|--------------------------------------|----------|
| 32 Cis ---/ PRLR                   | 36 Cis ---/ PRLR                     | -46,098  |
| 33 EGF ---> STAT3                  | 37 EGF ---> STAT3                    | -46,098  |
| 34 SOCS-1 ---/ PRL                 | 38 SOCS-1 ---/ PRL                   | -46,098  |
| 35 Htt ---/ Caspase-8              | 39 Htt ---/ Caspase-8                | -46,098  |
| 36 SOCS-3 ---/ EpoR                | 40 SOCS-3 ---/ EpoR                  | -46,098  |
| 37 SOCS-3 ---/ PRLR                | 41 SOCS-3 ---/ PRLR                  | -46,098  |
| 204 MHC class II ---> NF-AT        | 217 MHC class II ---> NF-AT          | -34,981  |
| 159 LAT ---> p50:RelA              | 178 LAT ---> p50:RelA                | -37,519  |
| 160 LPS ---> JNK                   | 179 LPS ---> JNK                     | -37,519  |
| 102 PRL ---> Raf-1                 | 108 PRL ---> Raf-1                   | -44,807  |
| 126 fMLP ---> superoxide           | 111 fMLP ---> superoxide             | 59,267   |
| 48 Smac ---/ cIAP-2                | 52 Smac ---/ cIAP-2                  | -33,896  |
| 49 SHP-2 ---> PRL                  | 53 SHP-2 ---> PRL                    | -33,896  |
| 50 Smac ---/ cIAP-1                | 54 Smac ---/ cIAP-1                  | -33,896  |
| 51 DLK ---> c-Jun                  | 55 DLK ---> c-Jun                    | -33,896  |
| 52 beta-arrestin2 ---> c-Jun       | 56 beta-arrestin2 ---> c-Jun         | -33,896  |
| 53 ASK1 ---DUSP19---> c-Jun        | 58 ASK1 ---DUSP19---> c-Jun          | -33,896  |
| 54 PRL ---Gab-2---> PI3K           | 59 PRL ---Gab-2---> PI3K             | -33,896  |
| 55 PDGF B ---> PAK-1               | 60 PDGF B ---> PAK-1                 | -33,896  |
| 121 IFNalpha, IFNbeta ---> PI3K    | 194 IFNalpha, IFNbeta ---> PI3K      | -283,342 |
| 122 dsRNA ---> c-Jun               | 129 dsRNA ---> c-Jun                 | -33,187  |
| 132 cyclosome regulation           | 128 cyclosome regulation             | 48,606   |
| 133 LAT ---> Ras                   | 136 LAT ---> Ras                     | -28,097  |
| 134 LAT ---> MLC                   | 137 LAT ---> MLC                     | -28,097  |
| 135 MHC class I ---> LAT           | 138 MHC class I ---> LAT             | -28,097  |
| 70 MKK3 ---> HNF-1alpha            | 77 MKK3 ---> HNF-                    | -26,042  |
| 71 Epo ---> SHP-1                  | 78 Epo ---> SHP-1                    | -26,042  |
| 72 GH pathway                      | 79 GH pathway                        | -26,042  |
| 73 PDGF A ---> Crk                 | 80 PDGF A ---> Crk                   | -26,042  |
| 74 Apo2L ---> Caspase-10           | 81 Apo2L ---> Caspase-10             | -26,042  |
| 75 GH ---> Grb-2                   | 82 GH ---> Grb-2                     | -26,042  |
| 76 Nod1 ---> Caspase-9             | 83 Nod1 ---> Caspase-9               | -26,042  |
| 245 BCR ---> NF-AT                 | 230 BCR ---> NF-AT                   | 25,248   |
| 99 insulin ---Jak1---> IRS-1, IRS- | 103 insulin ---Jak1---> IRS-1, IRS-2 | -20,693  |
| 100 Src ---> Rap2B                 | 104 Src ---> Rap2B                   | -20,693  |
| 201 Plk1 activation and substrates | 251 Plk1 activation and substrates   | -26,124  |
| 202 insulin ---Shc---> MAPK casc   | 196 insulin ---Shc---> MAPK cascade  | 23,606   |
| 203 Plk1 cell cycle regulation     | 252 Plk1 cell cycle regulation       | -26,124  |
| 200 PRL ---Src,FAK1---> ERK        | 204 PRL ---Src,FAK1---> ERK          | -14,352  |
| 120 Epo ---> PIP3                  | 125 Epo ---> PIP3                    | -16,878  |
| 232 OSM pathway                    | 199 OSM pathway                      | 19,631   |
| 129 VEGF-A ---> PLA2               | 193 VEGF-A ---> PLA2                 | -44,476  |
| 136 IFNalpha, IFNbeta ---> STAT    | 223 IFNalpha, IFNbeta ---> STAT5     | -155,857 |
| 137 Apaf-1 ---> Caspase-7          | 148 Apaf-1 ---> Caspase-7            | -16,379  |
| 138 Apaf-1 ---> Caspase-3          | 149 Apaf-1 ---> Caspase-3            | -16,379  |
| 139 CD19 ---> PLCgamma2            | 150 CD19 ---> PLCgamma2              | -16,379  |
| 191 OSM ---> ERK                   | 183 OSM ---> ERK                     | 17,694   |
| 155 activin A ---> Smad2           | 157 activin A ---> Smad2             | -12,001  |

|     |                              |     |                                         |         |
|-----|------------------------------|-----|-----------------------------------------|---------|
| 156 | activin A ---> Smad3         | 158 | activin A ---> Smad3                    | -12,001 |
| 157 | PRL ---Fyn---> PI3K          | 159 | PRL ---Fyn---> PI3K                     | -12,001 |
| 56  | ErbB1 ---> endophilin 1      | 61  | ErbB1 ---> endophilin 1                 | -12,186 |
| 57  | TAO1 ---> p38alpha           | 62  | TAO1 ---> p38alpha                      | -12,186 |
| 58  | MLK2 ---> JNK1               | 63  | MLK2 ---> JNK1                          | -12,186 |
| 59  | TAO2 ---MKK6---> p38alpha    | 64  | TAO2 ---MKK6---><br>p38alpha            | -12,186 |
| 60  | E1 ---/ ErbB3                | 65  | E1 ---/ ErbB3                           | -12,186 |
| 61  | MLK2 ---MKK3---> p38alpha    | 66  | MLK2 ---MKK3---><br>p38alpha            | -12,186 |
| 62  | MLK2 ---MKK6---> p38alpha    | 67  | MLK2 ---MKK6---><br>p38alpha            | -12,186 |
| 63  | TAK1 ---> p38alpha           | 68  | TAK1 ---> p38alpha                      | -12,186 |
| 64  | TAO2 ---MKK3---> p38alpha    | 69  | TAO2 ---MKK3---><br>p38alpha            | -12,186 |
| 252 | dsRNA ---> p50:RelA          | 248 | dsRNA ---> p50:RelA                     | 11,169  |
| 84  | MEKK3 ---> ATF-2             | 87  | MEKK3 ---> ATF-2                        | -9,071  |
| 85  | MEKK2 ---MKK7---> JNK1       | 88  | MEKK2 ---MKK7---><br>JNK1               | -9,071  |
| 86  | MEKK2 ---> ATF-2             | 89  | MEKK2 ---> ATF-2                        | -9,071  |
| 87  | GCK ---> MKK4                | 90  | GCK ---> MKK4                           | -9,071  |
| 88  | PDGF A ---> SHP-2            | 91  | PDGF A ---> SHP-2                       | -9,071  |
| 89  | MKK4 ---> c-Jun              | 92  | MKK4 ---> c-Jun                         | -9,071  |
| 90  | PDGF B ---> PKR              | 93  | PDGF B ---> PKR                         | -9,071  |
| 91  | TAK1 ---> c-Jun              | 94  | TAK1 ---> c-Jun                         | -9,071  |
| 92  | p38alpha ---> STAT3          | 95  | p38alpha ---> STAT3                     | -9,071  |
| 93  | JNK2 ---> doublecortin       | 96  | JNK2 ---> doublecortin                  | -9,071  |
| 94  | Epo ---Lyn---> STAT5A        | 97  | Epo ---Lyn---><br>STAT5A                | -9,071  |
| 95  | MEKK2 ---> ATF-2             | 98  | MEKK2 ---> ATF-2                        | -9,071  |
| 230 | IFNalpha, IFNbeta ---> STAT  | 266 | STAT1alpha, STAT2,<br>STAT3             | -75,551 |
| 231 | insulin ---IRS---> PRK2, SHP | 232 | insulin ---IRS---><br>PRK2, SHP-2, MAPK | -7,030  |
| 247 | mTOR ----> S6, eIF-4E        | 249 | mTOR ----> S6, eIF-4E                   | -5,556  |
| 257 | ZAP-70 ---> Elk-1            | 260 | ZAP-70 ---> Elk-1                       | -4,946  |
| 258 | PDGF A ---> ERK              | 261 | PDGF A ---> ERK                         | -4,946  |
| 259 | AKT, MAPKAPK2 ---/ tuberi    | 262 | AKT, MAPKAPK2 ---/<br>tuberin           | -4,946  |
| 260 | PDGF B ---> ERK              | 263 | PDGF B ---> ERK                         | -4,946  |
| 268 | BCR ---> ERK                 | 264 | BCR ---> ERK                            | 7,579   |
| 269 | TNF-alpha ---> NFkappaB      | 233 | TNF-alpha ---><br>NFkappaB              | 105,147 |
| 107 | MKP-5 ---/ p53; MKK4 ---> p  | 112 | MKP-5 ---/ p53; MKK4<br>---> p53        | -7,150  |
| 108 | VEGF-A ---> Ras              | 113 | VEGF-A ---> Ras                         | -7,150  |
| 109 | PKCdelta ---> GRK2           | 114 | PKCdelta ---> GRK2                      | -7,150  |
| 110 | PRL ---> Jak2                | 115 | PRL ---> Jak2                           | -7,150  |
| 111 | PDGF B ---> Src              | 116 | PDGF B ---> Src                         | -7,150  |
| 112 | PDGF A ---> Src              | 117 | PDGF A ---> Src                         | -7,150  |
| 113 | SHP-1 ---/ ErbB1             | 118 | SHP-1 ---/ ErbB1                        | -7,150  |
| 114 | CD148 ---/ PDGFRbeta         | 119 | CD148 ---/ PDGFRbeta                    | -7,150  |
| 115 | PRL ---Jak2---> STAT5A       | 120 | PRL ---Jak2---><br>STAT5A               | -7,150  |
| 116 | Unc18-1 ---/ PLD2            | 121 | Unc18-1 ---/ PLD2                       | -7,150  |
| 140 | MLK2 ---> NeuroD             | 139 | MLK2 ---> NeuroD                        | -5,819  |

|                                    |                                        |         |
|------------------------------------|----------------------------------------|---------|
| 141 PRL ---Src--> STAT5B           | 140 PRL ---Src-->                      | -5,819  |
| 142 Smac --> Caspase-3             | 141 Smac --> Caspase-3                 | -5,819  |
| 143 PTEN ---/ AKT-1                | 142 PTEN ---/ AKT-1                    | -5,819  |
| 144 Smurf-1 ---/ Smad7, TGFbeta1   | 143 Smurf-1 ---/ Smad7,<br>TGFbetaR-I  | -5,819  |
| 145 Epo --> STAT5                  | 144 Epo --> STAT5                      | -5,819  |
| 146 Htt --> Ca                     | 145 Htt --> Ca                         | -5,819  |
| 147 EDAR --> TRAF2                 | 146 EDAR --> TRAF2                     | -5,819  |
| 148 ASK1 ---MKK4--> JNK1           | 57 ASK1 ---MKK4--><br>JNK1             | 306,587 |
| 149 Fas ---/ Cdc42                 | 147 Fas ---/ Cdc42                     | -5,819  |
| 251 beta-catenin network           | 247 beta-catenin network               | 6,102   |
| 161 PDGF B --> STATs               | 174 PDGF B --> STATs                   | -4,857  |
| 162 JNK1 --> Bax                   | 175 JNK1 --> Bax                       | -4,857  |
| 163 Htt --> NeuroD                 | 176 Htt --> NeuroD                     | -4,857  |
| 164 JLP --> JNK1                   | 84 JLP --> JNK1                        | 239,067 |
| 262 VEGF-A ---/ Caspase-9, Bad     | 254 VEGF-A ---/ Caspase-9,<br>Bad      | 4,879   |
| 263 IL-12 - STAT4 pathway          | 255 IL-12 - STAT4 pathway              | 4,879   |
| 264 IL-12 --> STAT4                | 256 IL-12 --> STAT4                    | 4,879   |
| 193 PDGF B ---SHP-2--> Ras; PI     | 124 Ras; PDGF B ---<br>RasGAP---/ Ras  | 162,052 |
| 194 BMP7 --> Smad1, Smad5, Smad8   | 197 BMP7 --> Smad1,<br>Smad5, Smad8    | -3,618  |
| 195 SLP-65 ---/ Raf-1              | 198 SLP-65 ---/ Raf-1                  | -3,618  |
| 196 PDGF B---/ Ras                 | 126 PDGF B---/ Ras                     | 162,052 |
| 199 EDA-A2 ---TRAF3--> NF-kappaB   | 195 EDA-A2 ---TRAF3--><br>NF-kappaB    | 5,859   |
| 216 IL-22 --> STAT1alpha, STAT3    | 219 IL-22 --> STAT1alpha,<br>STAT3     | -3,159  |
| 217 Fer --> beta-catenin{ Tyr142 } | 220 Fer --> beta-<br>catenin{ Tyr142 } | -3,159  |
| 218 PDGF A --> AKT-1               | 221 PDGF A --> AKT-1                   | -3,159  |
| 219 IL-22 pathway                  | 222 IL-22 pathway                      | -3,159  |
| 220 IL-10 pathway                  | 224 IL-10 pathway                      | -3,159  |
| 221 PDK1 --> 4E-BP1, p70S6K1       | 225 PDK1 --> 4E-BP1,<br>p70S6K1        | -3,159  |
| 222 PDGF B --> AKT-1               | 226 PDGF B --> AKT-1                   | -3,159  |
| 223 EGF --> PLD2                   | 227 EGF --> PLD2                       | -3,159  |
| 224 IL-10 --> STAT1alpha, STAT3    | 228 IL-10 --> STAT1alpha,<br>STAT3     | -3,159  |
| 225 CHIP ---/ Pael-R               | 229 CHIP ---/ Pael-R                   | -3,159  |
| 226 Src ---/ RhoA                  | 151 Src ---/ RhoA                      | 136,319 |
| 241 TGFbeta --> Smad2, Smad3       | 240 TGFbeta --> Smad2,<br>Smad3        | -2,773  |
| 242 EGF --> DAG, IP3               | 241 EGF --> DAG, IP3                   | -2,773  |
| 243 Src --> Rac1                   | 242 Src --> Rac1                       | -2,773  |
| 244 Rac1 --> c-Jun, Elk-1          | 243 Rac1 --> c-Jun, Elk-1              | -2,773  |
| 270 VEGF-A --> NO                  | 231 VEGF-A --> NO                      | 72,404  |
| 248 Csk, CD45 --> Lck              | 250 Csk, CD45 --> Lck                  | -2,437  |
| 261 Csk, CD45 --> Fyn              | 265 Csk, CD45 --> Fyn                  | -2,226  |
| 227 PDGF A --> DAG, IP3            | 201 PDGF A --> DAG, IP3                | 4,551   |
| 228 PDGF B --> DAG, IP3            | 202 PDGF B --> DAG, IP3                | 4,551   |
| 229 PI3K ---/ p53                  | 203 PI3K ---/ p53                      | 4,551   |
| 273 G2/M phase (cyclin A:Cdk1)     | 273 G2/M phase (cyclin<br>A:Cdk1)      | 3,073   |

|                                     |                                                |        |
|-------------------------------------|------------------------------------------------|--------|
| 249 IL-4 - STAT6 pathway            | 245 IL-4 - STAT6 pathway                       | 2,695  |
| 250 IL-4 ---> STAT6                 | 246 IL-4 ---> STAT6                            | 2,695  |
| 128 MKK6 ---> Hsp27                 | 131 MKK6 ---> Hsp27                            | -1,627 |
| 165 MEK-1 ---> HIF-1alpha           | 160 MEK-1 ---> HIF-1alpha                      | -1,346 |
| 166 MKK6 ---/ MRF4                  | 161 MKK6 ---/ MRF4                             | -1,346 |
| 167 p38alpha ---> CREB              | 162 p38alpha ---> CREB                         | -1,346 |
| 168 E1 ---/ alpha-tubulin           | 163 E1 ---/ alpha-tubulin                      | -1,346 |
| 169 MKK6 ---> p53                   | 164 MKK6 ---> p53                              | -1,346 |
| 170 MKK4 ---/ RXR-alpha             | 165 MKK4 ---/ RXR-alpha                        | -1,346 |
| 171 MKK4 ---p38alpha---> ATF-2      | 166 MKK4 ---p38alpha---> ATF-2                 | -1,346 |
| 172 E1 ---/ synaptotagmin-11        | 167 E1 ---/ synaptotagmin-11                   | -1,346 |
| 173 E1 ---/ beta-tubulin            | 168 E1 ---/ beta-tubulin                       | -1,346 |
| 174 E1 ---/ Septin5                 | 169 E1 ---/ Septin5                            | -1,346 |
| 175 E1 ---dorfin---/ synphilin-1    | 170 E1 ---dorfin---/ synphilin-1               | -1,346 |
| 176 MEKK4 ---> JNK1                 | 171 MEKK4 ---> JNK1                            | -1,346 |
| 177 E1 ---parkin---/ synphilin-1    | 172 E1 ---parkin---/ synphilin-1               | -1,346 |
| 271 IL-8 ---> ERK2                  | 268 IL-8 ---> ERK2                             | 1,545  |
| 272 Eps15 ---> ErbB internalizatio  | 269 Eps15 ---> ErbB internalization inhibitory | 1,545  |
| 183 inhibitory phosphorylation of ' | 185 phosphorylation of TGFbetaR-II             | -1,142 |
| 184 MKK7 ---> c-Jun                 | 186 MKK7 ---> c-Jun                            | -1,142 |
| 185 EDA-A2 ---> TRAF6               | 187 EDA-A2 ---> TRAF6                          | -1,142 |
| 186 Fas ---> Caspase-8              | 188 Fas ---> Caspase-8                         | -1,142 |
| 187 PP2Calpha ---/ MKK4             | 189 PP2Calpha ---/ MKK4                        | -1,142 |
| 188 PP2Calpha ---/ MKK6             | 190 PP2Calpha ---/ MKK6                        | -1,142 |
| 189 Caspase-6 ---> Caspase-3        | 191 Caspase-6 ---> Caspase-3                   | -1,142 |
| 190 MEKK4 --MKK6---> ATF-2          | 192 MEKK4 --MKK6---> ATF-2                     | -1,142 |
| 206 Rac1 ---/ cofilin               | 206 Rac1 ---/ cofilin                          | -0,985 |
| 207 Fas ---> Abl                    | 207 Fas ---> Abl                               | -0,985 |
| 208 E1 ---/ alpha-synuclein         | 208 E1 ---/ alpha-synuclein                    | -0,985 |
| 209 VEGF-A ---> STAT1alpha          | 209 VEGF-A ---> STAT1alpha                     | -0,985 |
| 210 EGF ---> N-WASP                 | 210 EGF ---> N-WASP                            | -0,985 |
| 211 LMW-PTP ---/ VEGFR-1            | 211 LMW-PTP ---/ VEGFR-1                       | -0,985 |
| 212 Fas ---/ SRF                    | 212 Fas ---/ SRF                               | -0,985 |
| 213 Fas ---/ NuMA                   | 213 Fas ---/ NuMA                              | -0,985 |
| 214 xolloid ---> BMP4               | 214 xolloid ---> BMP4                          | -0,985 |
| 215 Rac1 ---> p38                   | 215 Rac1 ---> p38                              | -0,985 |
| 236 Fas ---/ PRK2                   | 235 Fas ---/ PRK2                              | -0,854 |
| 237 E1 ---/ cyclin E                | 236 E1 ---/ cyclin E                           | -0,854 |
| 238 Rac1 ---> golgin-160            | 237 Rac1 ---> golgin-160                       | -0,854 |
| 239 MKK4 ---/ PPAR-gamma            | 238 MKK4 ---/ PPAR-gamma                       | -0,854 |
| 240 PDGF B ---> cortactin           | 239 PDGF B ---> cortactin                      | -0,854 |
| 265 Rac1 ---MLK3---> c-Jun          | 270 Rac1 ---MLK3---> c-                        | -0,679 |
| 266 HB-EGF ---> PI3K                | 271 HB-EGF ---> PI3K                           | -0,679 |
| 267 c-Jun degradation               | 272 c-Jun degradation                          | -0,679 |
| 253 POSH ---> JNK1, JNK2            | 257 POSH ---> JNK1, JNK2                       | -0,773 |

|                          |                          |        |
|--------------------------|--------------------------|--------|
| 254 Fas ---> Caspase-2   | 258 Fas ---> Caspase-2   | -0,773 |
| 255 Ubc9 ---/ p73alpha   | 259 Ubc9 ---/ p73alpha   | -0,773 |
| 274 IL-2 ---> STAT5      | 274 IL-2 ---> STAT5      | 1,151  |
| 275 IL-2 - STAT5 pathway | 275 IL-2 - STAT5 pathway | 1,151  |
| 276 OSM ---> STAT1       | 276 OSM ---> STAT1       | 1,151  |

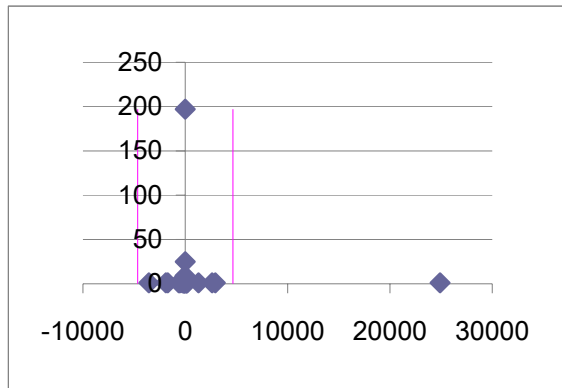

### High vs Control 1 table 7

| Control Rank | Sample Rank | Pathway name           | Delta Score  |
|--------------|-------------|------------------------|--------------|
|              | 1           | stress-associated pat  | 105191796,3  |
| 8            | 4           | EGF pathway            | 462995,8944  |
| 2            | 3           | p38 pathway            | -391151,6624 |
| 4            | 8           | Epo pathway            | -163093,3452 |
| 3            | 5           | RANKL pathway          | -157251,5837 |
| 10           | 13          | PRL pathway            | -102743,8744 |
| 9            | 6           | Fas pathway            | 271210,8076  |
| 14           | 2           | JNK pathway            | 2089743,305  |
| 26           | 28          | Caspase network        | -15419,93697 |
| 5            | 7           | BMP2 ---> p38alpha     | -15411,36894 |
| 15           | 22          | Apo2L pathway          | -16905,35411 |
| 29           | 47          | TGFbeta pathway        | -12776,42769 |
| 7            | 11          | TAK1 ---> ATF-2        | -7083,383705 |
| 11           | 12          | RANKL ---> MITF        | -4815,577821 |
| 72           | 102         | B-cell antigen recept  | -5722,181852 |
| 119          | 99          | T-cell antigen recept  | 5918,691127  |
| 13           | 16          | Epo ---> ERK1          | -3500,372226 |
| 104          | 106         | insulin pathway        | 115,5357167  |
| 70           | 50          | PDGF pathway           | 2073,714271  |
| 6            | 9           | EGF ---> PAK1          | -2298,62903  |
| 23           | 17          | IL-8 pathway           | 4137,652823  |
| 39           | 45          | alpha IIb beta3 pathw  | -2409,424991 |
| 40           | 46          | alpha IIb beta3 ---> ] | -2409,424991 |
| 20           | 23          | EGF ---> ERK           | -1996,043332 |
| 97           | 122         | IL-1 pathway           | -1812,443591 |
| 16           | 19          | ZAP-70 ---> c-Jun      | -1570,767268 |
| 28           | 33          | IL-1beta ---> c-Jun    | -1275,400328 |
| 105          | 132         | TLR3 pathway           | -1249,980279 |
| 183          | 155         | E2F network            | 1519,861084  |
| 41           | 51          | IL-1beta ---> Elk-1    | -1132,919507 |
| 19           | 15          | wnt pathway            | 1677,349921  |
| 62           | 18          | neurotensin pathway    | 6788,071844  |
| 17           | 20          | EGF ---> PI3K-C2b      | -905,7640202 |
| 18           | 21          | RANKL ---> JNK1        | -905,7640202 |
| 27           | 29          | Epo ---> IP3, PtsIns(  | -906,4850071 |
| 12           | 14          | c-Cbl ---/ ErBB1       | -757,7697857 |
| 184          | 216         | TLR4 pathway           | -630,4284506 |
| 21           | 26          | FasL ---> Caspase-3    | -661,4308662 |
| 22           | 27          | EGF ---> c-Fos         | -661,4308662 |
| 63           | 85          | RhoA ---> stress fib   | -556,5378494 |
| 64           | 86          | RhoA pathway           | -556,5378494 |
| 221          | 205         | p53 pathway            | 78,177674    |
| 68           | 43          | fMLP pathway           | 833,0669429  |
| 148          | 180         | IL-1beta ---> p50:Re   | -511,0327687 |
| 81           | 101         | LPS ---> p38           | -483,0031774 |
| 44           | 30          | parkin associated pa   | 709,9205988  |



|                    |                          |              |
|--------------------|--------------------------|--------------|
| 115 Rac1 pathway   | 130 Rac1 pathway         | -456,6118248 |
| 94 BCR ---> c-J    | 107 BCR ---> c-Jun       | -428,9647859 |
| 172 EDAR pathw     | 133 EDAR pathway         | 550,2846653  |
| 30 JNK1 ---> M     | 10 JNK1 ---> MKK4        | 16283,45629  |
| 31 JIP-1 ---> AF   | 34 JIP-1 ---> APP        | -255,3591295 |
| 69 LAT ---> cof    | 76 LAT ---> cofilin      | -261,1548327 |
| 103 BCR ---> p38   | 123 BCR ---> p38         | -236,6233663 |
| 185 IFN pathway    | 177 IFN pathway          | 382,7142584  |
| 186 LPS ---> NF-   | 200 LPS ---> NF-kappaF   | -194,188796  |
| 82 IFNgamma -      | 42 IFNgamma ---> ST/     | 1214,993089  |
| 42 Apo2L ---Ca     | 48 Apo2L ---Caspase-8    | -194,7037764 |
| 43 PRL ---IRS--    | 49 PRL ---IRS---> PI3F   | -194,7037764 |
| 173 G2/M phase     | 184 G2/M phase (cyclin   | -184,2823647 |
| 222 tuberin pathv  | 244 tuberin pathway      | -151,3471874 |
| 130 BCR ---MLK     | 152 BCR ---MLK3---> c    | -179,9763169 |
| 131 BCR ---> cyt   | 153 BCR ---> cytoskelet  | -179,9763169 |
| 132 insulin ---> g | 154 insulin ---> glucose | -179,9763169 |
| 24 EGF ---> ST.    | 24 EGF ---> STAT1alp     | -168,5738935 |
| 25 ASK1 ---> p.    | 25 ASK1 ---> p38alpha    | -168,5738935 |
| 99 PRL ---PI3K     | 109 PRL ---PI3K---> AK   | -173,7969942 |
| 146 Htt pathway    | 156 Htt pathway          | -158,7731348 |
| 100 Aurora-A cel   | 73 Aurora-A cell cycle   | 218,2892338  |
| 101 PPAR pathw     | 74 PPAR pathway          | 218,2892338  |
| 102 Aurora-A act   | 75 Aurora-A activation.  | 218,2892338  |
| 126 HIF-1alpha p   | 173 HIF-1alpha pathway   | -124,3791449 |
| 195 TNF-alpha p    | 127 TNF-alpha pathway    | 1230,370457  |
| 65 TNF-alpha --    | 70 TNF-alpha ---> c-Ju   | -153,1702529 |
| 66 Caspase-9 ---   | 71 Caspase-9 ---> Casp   | -153,1702529 |
| 67 PRL ---> PA     | 72 PRL ---> PAK1         | -153,1702529 |
| 241 VEGF-A pat     | 234 VEGF-A pathway       | 279,2552963  |
| 187 G1 phase (C    | 181 G1 phase (Cdk2)      | 147,9239624  |
| 71 G-alpha-q ---   | 110 G-alpha-q ---> arach | -170,2934332 |
| 120 RANKL --->     | 134 RANKL ---> AKT       | -127,3982623 |
| 121 dsRNA ---> ]   | 135 dsRNA ---> IKK-alf   | -127,3982623 |
| 80 EDA-A2 --->     | 31 EDA-A2 ---> c-Jun     | 1037,589624  |
| 236 insulin ---> A | 253 insulin ---> AKT-1 f | -22,42113571 |
| 32 EGF ---> SH     | 35 EGF ---> SHIP1        | -117,6196235 |
| 33 Cis ---/ PRLI   | 36 Cis ---/ PRLR         | -117,6196235 |
| 34 EGF ---> ST.    | 37 EGF ---> STAT3        | -117,6196235 |
| 35 SOCS-1 ---/ ]   | 38 SOCS-1 ---/ PRL       | -117,6196235 |
| 36 Htt ---/ Caspi  | 39 Htt ---/ Caspase-8    | -117,6196235 |
| 37 SOCS-3 ---/ ]   | 40 SOCS-3 ---/ EpoR      | -117,6196235 |

|                         |                            |              |
|-------------------------|----------------------------|--------------|
| 38 SOCS-3 ---/          | 41 SOCS-3 ---/ PRLR        | -117,6196235 |
| 118 cyclosome re        | 100 cyclosome regulator    | 146,559659   |
| 238 S phase (Cdk        | 218 S phase (Cdk2)         | 90,87593169  |
| 153 LAT ---> p50        | 178 LAT ---> p50:RelA      | -103,1956503 |
| 154 LPS ---> JNF        | 179 LPS ---> JNK           | -103,1956503 |
| 98 PRL ---> Raf         | 108 PRL ---> Raf-1         | -107,143571  |
| 123 p73 pathway         | 105 p73 pathway            | 119,8702688  |
| 45 Smac ---/ cIAP       | 52 Smac ---/ cIAP-2        | -86,97654604 |
| 46 SHP-2 ---> P         | 53 SHP-2 ---> PRL          | -86,97654604 |
| 47 Smac ---/ cIAP       | 54 Smac ---/ cIAP-1        | -86,97654604 |
| 48 DLK ---> c-Jun       | 55 DLK ---> c-Jun          | -86,97654604 |
| 49 beta-arrestin1       | 56 beta-arrestin2 ---> c-  | -86,97654604 |
| 50 ASK1 ---DU           | 58 ASK1 ---DUSP19---       | -86,97654604 |
| 51 PRL ---Gab-          | 59 PRL ---Gab-2---> PI     | -86,97654604 |
| 52 PDGF B --->          | 60 PDGF B ---> PAK-1       | -86,97654604 |
| 116 dsRNA ---> c        | 129 dsRNA ---> c-Jun       | -85,79673243 |
| 143 fMLP ---> su        | 111 fMLP ---> superoxic    | 97,89766986  |
| 124 LAT ---> MLC        | 137 LAT ---> MLC           | -73,23405127 |
| 125 MHC class I         | 138 MHC class I ---> LA    | -73,23405127 |
| 207 IFNalpha, IF        | 182 IFNalpha, IFNbeta, I   | 238,4341866  |
| 147 cyclosome re        | 128 cyclosome regulatio    | 79,81801536  |
| 73 MKK3 ---> HNF-1a     | 77 MKK3 ---> HNF-1a        | -67,34965229 |
| 74 Epo ---> SHP-1       | 78 Epo ---> SHP-1          | -67,34965229 |
| 75 GH pathway           | 79 GH pathway              | -67,34965229 |
| 76 PDGF A --->          | 80 PDGF A ---> Crk         | -67,34965229 |
| 77 Apo2L ---> Caspase   | 81 Apo2L ---> Caspase      | -67,34965229 |
| 78 GH ---> Grb-2        | 82 GH ---> Grb-2           | -67,34965229 |
| 79 Nod1 ---> Caspase-9  | 83 Nod1 ---> Caspase-9     | -67,34965229 |
| 249 MHC class II        | 217 MHC class II ---> N    | 161,6773359  |
| 95 insulin ---Jak       | 103 insulin ---Jak1---> II | -53,99402847 |
| 96 Src ---> Rap2B       | 104 Src ---> Rap2B         | -53,99402847 |
| 240 BCR ---> NF-AT      | 230 BCR ---> NF-AT         | 38,6252246   |
| 194 PRL ---Src,F        | 204 PRL ---Src,FAK1---     | -39,43626531 |
| 117 Epo ---> PIP3       | 125 Epo ---> PIP3          | -44,48930663 |
| 223 insulin ---Shc      | 196 insulin ---Shc---> M   | 36,86670007  |
| 127 Apaf-1 ---> Caspase | 148 Apaf-1 ---> Caspase    | -39,79837848 |
| 128 Apaf-1 ---> Caspase | 149 Apaf-1 ---> Caspase    | -39,79837848 |
| 129 CD19 ---> PLCgamma  | 150 CD19 ---> PLCgamma     | -39,79837848 |
| 235 OSM pathwa          | 199 OSM pathway            | 30,23197963  |
| 263 Plk1 activatio      | 251 Plk1 activation and s  | 21,80957288  |
| 264 Plk1 cell cyc       | 252 Plk1 cell cycle regul  | 21,80957288  |
| 149 activin A --->      | 157 activin A ---> Smad    | -32,27797217 |
| 150 activin A --->      | 158 activin A ---> Smad    | -32,27797217 |
| 151 PRL ---Fyn---       | 159 PRL ---Fyn---> PI3F    | -32,27797217 |
| 152 LAT ---> PKCtheta   | 32 LAT ---> PKCtheta       | 1488,736458  |
| 145 VEGF-A --->         | 193 VEGF-A ---> PLA2       | -29,2285043  |
| 53 ErbB1 ---> endophil  | 61 ErbB1 ---> endophil     | -32,23788852 |
| 54 TAO1 ---> p38alpha   | 62 TAO1 ---> p38alpha      | -32,23788852 |

|                    |                           |              |
|--------------------|---------------------------|--------------|
| 55 MLK2 ---> J     | 63 MLK2 ---> JNK1         | -32,23788852 |
| 56 TAO2 ---MK      | 64 TAO2 ---MKK6---        | -32,23788852 |
| 57 E1 ---/ ErbB3   | 65 E1 ---/ ErbB3          | -32,23788852 |
| 58 MLK2 ---MF      | 66 MLK2 ---MKK3---        | -32,23788852 |
| 59 MLK2 ---MF      | 67 MLK2 ---MKK6---        | -32,23788852 |
| 60 TAK1 ---> p     | 68 TAK1 ---> p38alpha     | -32,23788852 |
| 61 TAO2 ---MK      | 69 TAO2 ---MKK3---        | -32,23788852 |
| 193 OSM ---> EF    | 183 OSM ---> ERK          | 27,73705871  |
| 174 IFNalpha, IF   | 194 IFNalpha, IFNbeta -   | -24,80528675 |
| 192 LAT ---> Ra    | 136 LAT ---> Ras          | 193,3661012  |
| 254 dsRNA ---> j   | 248 dsRNA ---> p50:Rel    | 16,23728016  |
| 83 MEKK3 --->      | 87 MEKK3 ---> ATF-2       | -24,31341612 |
| 84 MEKK2 ---M      | 88 MEKK2 ---MKK7--        | -24,31341612 |
| 85 MEKK2 --->      | 89 MEKK2 ---> ATF-2       | -24,31341612 |
| 86 GCK ---> M      | 90 GCK ---> MKK4          | -24,31341612 |
| 87 PDGF A --->     | 91 PDGF A ---> SHP-2      | -24,31341612 |
| 88 MKK4 ---> c     | 92 MKK4 ---> c-Jun        | -24,31341612 |
| 89 PDGF B --->     | 93 PDGF B ---> PKR        | -24,31341612 |
| 90 TAK1 ---> c.    | 94 TAK1 ---> c-Jun        | -24,31341612 |
| 91 p38alpha --->   | 95 p38alpha ---> STAT     | -24,31341612 |
| 92 Epo ---Lyn--    | 97 Epo ---Lyn---> STA     | -24,31341612 |
| 93 MEKK2 --->      | 98 MEKK2 ---> ATF-2       | -24,31341612 |
| 220 insulin ---IRS | 232 insulin ---IRS---> PI | -21,65947924 |
| 237 mTOR ---->     | 249 mTOR ----> S6, eIF    | -16,56576239 |
| 245 ZAP-70 --->    | 260 ZAP-70 ---> Elk-1     | -15,16034362 |
| 246 PDGF A --->    | 261 PDGF A ---> ERK       | -15,16034362 |
| 247 AKT, MAPK      | 262 AKT, MAPKAPK2         | -15,16034362 |
| 248 PDGF B --->    | 263 PDGF B ---> ERK       | -15,16034362 |
| 106 MKP-5 ---/ p   | 112 MKP-5 ---/ p53; MK    | -19,37067962 |
| 107 VEGF-A --->    | 113 VEGF-A ---> Ras       | -19,37067962 |
| 108 PRL ---> Jak   | 115 PRL ---> Jak2         | -19,37067962 |
| 109 PDGF B --->    | 116 PDGF B ---> Src       | -19,37067962 |
| 110 PDGF A --->    | 117 PDGF A ---> Src       | -19,37067962 |
| 111 SHP-1 ---/ Er  | 118 SHP-1 ---/ ErbB1      | -19,37067962 |
| 112 CD148 ---/ P   | 119 CD148 ---/ PDGFRt     | -19,37067962 |
| 113 PRL ---Jak2-   | 120 PRL ---Jak2---> ST/   | -19,37067962 |
| 114 Unc18-1 ---/   | 121 Unc18-1 ---/ PLD2     | -19,37067962 |
| 267 BCR ---> ER    | 264 BCR ---> ERK          | 10,39503855  |
| 268 TNF-alpha --   | 233 TNF-alpha ---> NFk    | 107,9632621  |
| 133 MLK2 ---> N    | 139 MLK2 ---> NeuroD      | -16,00984838 |
| 134 PRL ---Src--   | 140 PRL ---Src---> STA'   | -16,00984838 |
| 135 Smac ---> Cc   | 141 Smac ---> Caspase-2   | -16,00984838 |
| 136 PTEN ---/ Al   | 142 PTEN ---/ AKT-1       | -16,00984838 |
| 137 Smurf-1 ---/   | 143 Smurf-1 ---/ Smad7,   | -16,00984838 |

|                           |                           |              |
|---------------------------|---------------------------|--------------|
| 138 Epo ---> STAT5        | 144 Epo ---> STAT5        | -16,00984838 |
| 139 Htt ---> Ca           | 145 Htt ---> Ca           | -16,00984838 |
| 140 EDAR ---> TRAF2       | 146 EDAR ---> TRAF2       | -16,00984838 |
| 141 ASK1 ---MKK4          | 57 ASK1 ---MKK4           | 296,3965869  |
| 142 Fas ---/ Cdc42        | 147 Fas ---/ Cdc42        | -16,00984838 |
| 155 PDGF B ---> STAT4     | 174 PDGF B ---> STAT4     | -13,60362822 |
| 156 JNK1 ---> Bax         | 175 JNK1 ---> Bax         | -13,60362822 |
| 157 Htt ---> NeuroD       | 176 Htt ---> NeuroD       | -13,60362822 |
| 158 JLP ---> JNK1         | 84 JLP ---> JNK1          | 230,3204184  |
| 253 beta-catenin network  | 247 beta-catenin network  | 8,628379475  |
| 188 PDGF B ---SHP-2       | 124 PDGF B ---SHP-2       | 155,1682274  |
| 189 BMP7 ---> Smad1,5,8   | 197 BMP7 ---> Smad1,5,8   | -10,50154492 |
| 190 SLP-65 ---/ Raf-1     | 198 SLP-65 ---/ Raf-1     | -10,50154492 |
| 191 PDGF B---/ Ras        | 126 PDGF B---/ Ras        | 155,1682274  |
| 260 VEGF-A ---/ Caspase   | 254 VEGF-A ---/ Caspase   | 6,666090963  |
| 261 IL-12 - STAT4 pathway | 255 IL-12 - STAT4 pathway | 6,666090963  |
| 262 IL-12 ---> STAT4      | 256 IL-12 ---> STAT4      | 6,666090963  |
| 208 IL-22 ---> STAT1alpha | 219 IL-22 ---> STAT1alpha | -9,398912844 |
| 209 Fer ---> beta-catenin | 220 Fer ---> beta-catenin | -9,398912844 |
| 210 PDGF A ---> AKT-1     | 221 PDGF A ---> AKT-1     | -9,398912844 |
| 211 IL-22 pathway         | 222 IL-22 pathway         | -9,398912844 |
| 212 IFNalpha, IFNbeta     | 223 IFNalpha, IFNbeta     | -9,398912844 |
| 213 IL-10 pathway         | 224 IL-10 pathway         | -9,398912844 |
| 214 PDK1 ---> 4E-BP1      | 225 PDK1 ---> 4E-BP1      | -9,398912844 |
| 215 PDGF B ---> AKT-1     | 226 PDGF B ---> AKT-1     | -9,398912844 |
| 216 EGF ---> PLD2         | 227 EGF ---> PLD2         | -9,398912844 |
| 217 IL-10 ---> STAT1alpha | 228 IL-10 ---> STAT1alpha | -9,398912844 |
| 218 CHIP ---/ Pael-R      | 229 CHIP ---/ Pael-R      | -9,398912844 |
| 219 Src ---/ RhoA         | 151 Src ---/ RhoA         | 130,0795627  |
| 227 TGFbeta ---> Smad2    | 240 TGFbeta ---> Smad2    | -8,490895752 |
| 228 Src ---> Rac1         | 242 Src ---> Rac1         | -8,490895752 |
| 229 Rac1 ---> c-Jun, Elk  | 243 Rac1 ---> c-Jun, Elk  | -8,490895752 |
| 239 Csk, CD45 ---> Lck    | 250 Csk, CD45 ---> Lck    | -7,721816554 |
| 252 Csk, CD45 ---> Fyn    | 265 Csk, CD45 ---> Fyn    | -7,202503563 |
| 259 G2/M phase (cyclin D) | 273 G2/M phase (cyclin D) | -7,255269942 |
| 265 IFNalpha, IFNbeta     | 266 IFNalpha, IFNbeta     | 5,084837486  |
| 266 VEGF-A ---> NO        | 231 VEGF-A ---> NO        | 73,60596171  |
| 224 PDGF A ---> DAG, IP3  | 201 PDGF A ---> DAG, IP3  | 6,613566836  |
| 225 PDGF B --> DAG, IP3   | 202 PDGF B --> DAG, IP3   | 6,613566836  |
| 226 PI3K ---/ p53         | 203 PI3K ---/ p53         | 6,613566836  |
| 250 IL-4 - STAT6 pathway  | 245 IL-4 - STAT6 pathway  | 3,651700968  |
| 251 IL-4 ---> STAT6       | 246 IL-4 ---> STAT6       | 3,651700968  |
| 122 MKK6 ---> Hsp27       | 131 MKK6 ---> Hsp27       | -4,767221726 |
| 258 EGF ---> DAG, IP3     | 241 EGF ---> DAG, IP3     | 36,51428191  |

|                             |                               |              |
|-----------------------------|-------------------------------|--------------|
| 159 MEK-1 --->              | 160 MEK-1 ---> HIF-1a         | -4,437030777 |
| 160 MKK6 ---/ M             | 161 MKK6 ---/ MRF4            | -4,437030777 |
| 161 p38alpha --->           | 162 p38alpha ---> CREB        | -4,437030777 |
| 162 E1 ---/ alpha-          | 163 E1 ---/ alpha-tubulin     | -4,437030777 |
| 163 MKK6 ---> p             | 164 MKK6 ---> p53             | -4,437030777 |
| 164 MKK4 ---/ R             | 165 MKK4 ---/ RXR- $\alpha$   | -4,437030777 |
| 165 MKK4 ---p38             | 166 MKK4 ---p38alpha-         | -4,437030777 |
| 166 E1 ---/ synap           | 167 E1 ---/ synaptotagm       | -4,437030777 |
| 167 E1 ---/ beta-t          | 168 E1 ---/ beta-tubulin      | -4,437030777 |
| 168 E1 ---/ Septin          | 169 E1 ---/ Septin5           | -4,437030777 |
| 169 E1 ---dorfin-           | 170 E1 ---dorfin---/ synp     | -4,437030777 |
| 170 MEKK4 --->              | 171 MEKK4 ---> JNK1           | -4,437030777 |
| 171 E1 ---parkin-           | 172 E1 ---parkin---/ synp     | -4,437030777 |
| 175 inhibitory ph           | 185 inhibitory phosphory      | -3,528516668 |
| 176 MKK7 ---> c             | 186 MKK7 ---> c-Jun           | -3,528516668 |
| 177 Fas ---> Casp           | 188 Fas ---> Caspase-8        | -3,528516668 |
| 178 JNK2 ---> dc            | 96 JNK2 ---> doubleco         | 116,4408007  |
| 179 PP2Calpha --            | 189 PP2Calpha ---/ MKF        | -3,528516668 |
| 180 PP2Calpha --            | 190 PP2Calpha ---/ MKF        | -3,528516668 |
| 181 Caspase-6 ---           | 191 Caspase-6 ---> Casp       | -3,528516668 |
| 182 MEKK4 --M               | 192 MEKK4 --MKK6---           | -3,528516668 |
| 269 IL-8 ---> ER            | 268 IL-8 ---> ERK2            | 1,870590591  |
| 270 Eps15 ---> E            | 269 Eps15 ---> ErbB int       | 1,870590591  |
| 196 Rac1 ---/ cof           | 206 Rac1 ---/ cofilin         | -3,156909041 |
| 197 Fas ---> Abl            | 207 Fas ---> Abl              | -3,156909041 |
| 198 E1 ---/ alpha-          | 208 E1 ---/ alpha-synucle     | -3,156909041 |
| 199 PKCdelta ---            | 114 PKCdelta ---> GRK         | 92,29411502  |
| 200 VEGF-A --->             | 209 VEGF-A ---> STAT          | -3,156909041 |
| 201 EGF ---> N <sup>1</sup> | 210 EGF ---> N-WASP           | -3,156909041 |
| 202 LMW-PTP --              | 211 LMW-PTP ---/ VEG          | -3,156909041 |
| 203 Fas ---/ SRF            | 212 Fas ---/ SRF              | -3,156909041 |
| 204 Fas ---/ NuM            | 213 Fas ---/ NuMA             | -3,156909041 |
| 205 xolloid ---> F          | 214 xolloid ---> BMP4         | -3,156909041 |
| 206 Rac1 ---> p3            | 215 Rac1 ---> p38             | -3,156909041 |
| 230 Fas ---/ PRK            | 235 Fas ---/ PRK2             | -2,864856895 |
| 231 E1 ---/ cyclin          | 236 E1 ---/ cyclin E          | -2,864856895 |
| 232 Rac1 ---> go            | 237 Rac1 ---> golgin-16       | -2,864856895 |
| 233 MKK4 ---/ P             | 238 MKK4 ---/ PPAR-g $\alpha$ | -2,864856895 |
| 234 PDGF B --->             | 239 PDGF B ---> cortact       | -2,864856895 |
| 255 Rac1 ---MLK             | 270 Rac1 ---MLK3---> c        | -2,484075034 |
| 256 HB-EGF --->             | 271 HB-EGF ---> PI3K          | -2,484075034 |
| 257 c-Jun degrad            | 272 c-Jun degradation         | -2,484075034 |
| 242 Fas ---> Casp           | 258 Fas ---> Caspase-2        | -2,676064487 |
| 243 Ubc9 ---/ p7 $\alpha$   | 259 Ubc9 ---/ p73alpha        | -2,676064487 |
| 271 IL-2 ---> ST $\alpha$   | 274 IL-2 ---> STAT5           | 1,281274443  |



### High vs.control 2 table 8

| Control Rank | Pathway name                  | Sample Rank | Pathway name                | Delta Score |
|--------------|-------------------------------|-------------|-----------------------------|-------------|
| 1            | stress-associated pathways    | 1           | stress-associated pathways  | 73577938,8  |
| 4            | EGF pathway                   | 4           | EGF pathway                 | 269394,619  |
| 3            | JNK pathway                   | 2           | JNK pathway                 | 1344618,07  |
| 7            | Fas pathway                   | 6           | Fas pathway                 | 56483,8642  |
| 2            | p38 pathway                   | 3           | p38 pathway                 | 43897,5229  |
| 8            | Epo pathway                   | 8           | Epo pathway                 | 18776,9272  |
| 5            | RANKL pathway                 | 5           | RANKL pathway               | 17923,5892  |
| 17           | PRL pathway                   | 13          | PRL pathway                 | 11459,6106  |
| 31           | Caspase network               | 28          | Caspase network             | 9653,51643  |
| 12           | LPS ---> p38                  | 101         | LPS ---> p38                | -61451,137  |
| 13           | LPS ---> JNK                  | 179         | LPS ---> JNK                | -47580,873  |
| 6            | BMP2 ---> p38alpha            | 7           | BMP2 ---> p38alpha          | 1824,47828  |
| 14           | neurotensin pathway           | 18          | neurotensin pathway         | -16692,679  |
| 24           | Apo2L pathway                 | 22          | Apo2L pathway               | 1933,3294   |
| 47           | TLR4 pathway                  | 216         | TLR4 pathway                | -17692,979  |
| 105          | T-cell antigen receptor pathv | 99          | T-cell antigen receptor pat | 1433,08914  |
| 50           | TGFbeta pathway               | 47          | TGFbeta pathway             | 1423,69414  |
| 10           | JNK1 ---> MKK4                | 10          | JNK1 ---> MKK4              | 822,939746  |
| 11           | TAK1 ---> ATF-2               | 11          | TAK1 ---> ATF-2             | 822,939746  |
| 19           | IL-8 pathway                  | 17          | IL-8 pathway                | -1438,8863  |
| 116          | insulin pathway               | 106         | insulin pathway             | 755,658012  |
| 15           | RANKL ---> MITF               | 12          | RANKL ---> MITF             | 560,042189  |
| 110          | B-cell antigen receptor pathv | 102         | B-cell antigen receptor pat | 627,630127  |
| 45           | LPS ---> NF-kappaB            | 200         | LPS ---> NF-kappaB          | -7963,8664  |
| 20           | Epo ---> ERK1                 | 16          | Epo ---> ERK1               | 403,81925   |
| 9            | EGF ---> PAK1                 | 9           | EGF ---> PAK1               | 248,536824  |
| 104          | PDGF pathway                  | 50          | PDGF pathway                | 5806,61116  |
| 147          | E2F network                   | 155         | E2F network                 | -622,21006  |
| 16           | wnt pathway                   | 15          | wnt pathway                 | -579,38247  |
| 106          | TLR3 pathway                  | 132         | TLR3 pathway                | -2104,7261  |
| 48           | alpha IIb beta3 pathway       | 45          | alpha IIb beta3 pathway     | 329,270375  |
| 49           | alpha IIb beta3 ---> Rac1     | 46          | alpha IIb beta3 ---> Rac1   | 329,270375  |
| 25           | EGF ---> ERK                  | 23          | EGF ---> ERK                | 225,855736  |
| 127          | IL-1 pathway                  | 122         | IL-1 pathway                | 197,142496  |
| 21           | ZAP-70 ---> c-Jun             | 19          | ZAP-70 ---> c-Jun           | 175,270189  |
| 36           | fMLP pathway                  | 43          | fMLP pathway                | -292,23474  |
| 34           | IL-1beta ---> c-Jun           | 33          | IL-1beta ---> c-Jun         | 136,669998  |
| 30           | parkin associated pathways    | 30          | parkin associated pathway   | -248,62879  |
| 61           | IL-1beta ---> Elk-1           | 51          | IL-1beta ---> Elk-1         | 124,32351   |
| 202          | p53 pathway                   | 205         | p53 pathway                 | -189,95805  |
| 22           | EGF ---> PI3K-C2beta          | 20          | EGF ---> PI3K-C2beta        | 97,4001465  |
| 23           | RANKL ---> JNK1               | 21          | RANKL ---> JNK1             | 97,4001465  |
| 32           | Epo ---> IP3, PtsIns(3,4)P    | 29          | Epo ---> IP3, PtsIns(3,4)P  | 98,2138601  |
| 18           | c-Cbl ---/ ErBB1              | 14          | c-Cbl ---/ ErBB1            | 78,59088    |
| 78           | RhoA ---> stress fiber forma  | 85          | RhoA ---> stress fiber forr | -178,51005  |
| 79           | RhoA pathway                  | 86          | RhoA pathway                | -178,51005  |

|                                          |                                          |            |
|------------------------------------------|------------------------------------------|------------|
| 44 IFNgamma ---> STAT1alpha              | 42 IFNgamma ---> STAT1alpha              | 75,9219036 |
| 28 FasL ---> Caspase-3                   | 26 FasL ---> Caspase-3                   | 69,7918532 |
| 29 EGF ---> c-Fos                        | 27 EGF ---> c-Fos                        | 69,7918532 |
| 130 TNF-alpha pathway                    | 127 TNF-alpha pathway                    | 65,7636619 |
| 179 IL-1beta ---> p50:RelA               | 180 IL-1beta ---> p50:RelA               | 48,3962652 |
| 33 LAT ---> PKCtheta                     | 32 LAT ---> PKCtheta                     | 51,5838135 |
| 132 Rac1 pathway                         | 130 Rac1 pathway                         | 45,174995  |
| 178 IFN pathway                          | 177 IFN pathway                          | 38,1953297 |
| 114 BCR ---> c-Jun                       | 107 BCR ---> c-Jun                       | 41,4704672 |
| 89 dsRNA ---> IKK-alpha:IKK              | 135 dsRNA ---> IKK-alpha:IKK             | -734,13278 |
| 72 Aurora-A cell cycle regulation        | 73 Aurora-A cell cycle regulation        | -78,985241 |
| 73 PPAR pathway                          | 74 PPAR pathway                          | -78,985241 |
| 74 Aurora-A activation, substrate        | 75 Aurora-A activation, substrate        | -78,985241 |
| 71 dsRNA ---> c-Jun                      | 129 dsRNA ---> c-Jun                     | -702,26098 |
| 182 EDAR pathway                         | 133 EDAR pathway                         | 831,289754 |
| 233 VEGF-A pathway                       | 234 VEGF-A pathway                       | 14,949991  |
| 35 JIP-1 ---> APP                        | 34 JIP-1 ---> APP                        | 24,4952547 |
| 159 G1 phase (Cdk2)                      | 181 G1 phase (Cdk2)                      | -57,584937 |
| 80 LAT ---> cofilin                      | 76 LAT ---> cofilin                      | 24,0152997 |
| 128 BCR ---> p38                         | 123 BCR ---> p38                         | 21,7390394 |
| 90 cyclosome regulatory network          | 100 cyclosome regulatory network         | -54,051017 |
| 248 tuberin pathway                      | 244 tuberin pathway                      | 9,12245919 |
| 191 G2/M phase (cyclin B:Cdk1)           | 184 G2/M phase (cyclin B:Cdk1)           | 13,8168947 |
| 51 Apo2L ---Caspase-8---> Caspase-3      | 48 Apo2L ---Caspase-8---> Caspase-3      | 18,041807  |
| 52 PRL ---IRS---> PI3K                   | 49 PRL ---IRS---> PI3K                   | 18,041807  |
| 152 BCR ---MLK3---> c-Jun                | 152 BCR ---MLK3---> c-Jun                | 15,4982804 |
| 153 BCR ---> cytoskeletal reorganization | 153 BCR ---> cytoskeletal reorganization | 15,4982804 |
| 154 insulin ---> glucose uptake          | 154 insulin ---> glucose uptake          | 15,4982804 |
| 204 S phase (Cdk2)                       | 218 S phase (Cdk2)                       | -38,474831 |
| 155 HIF-1alpha pathway                   | 173 HIF-1alpha pathway                   | -43,345221 |
| 26 EGF ---> STAT1alpha                   | 24 EGF ---> STAT1alpha                   | 14,9085701 |
| 27 ASK1 ---> p38alpha                    | 25 ASK1 ---> p38alpha                    | 14,9085701 |
| 115 PRL ---PI3K---> AKT                  | 109 PRL ---PI3K---> AKT                  | 15,5441102 |
| 107 p73 pathway                          | 105 p73 pathway                          | -44,721358 |
| 160 Htt pathway                          | 156 Htt pathway                          | 13,0585585 |
| 249 insulin ---> AKT-1 pathway           | 253 insulin ---> AKT-1 pathway           | -31,198154 |
| 180 IFNalpha, IFNbeta, IFNgamma          | 182 IFNalpha, IFNbeta, IFNgamma          | 10,9999045 |
| 75 TNF-alpha ---> c-Jun                  | 70 TNF-alpha ---> c-Jun                  | 13,6399571 |
| 76 Caspase-9 ---> Caspases               | 71 Caspase-9 ---> Caspases               | 13,6399571 |
| 77 PRL ---> PAK1                         | 72 PRL ---> PAK1                         | 13,6399571 |
| 111 G-alpha-q ---> arachidonic acid      | 110 G-alpha-q ---> arachidonic acid      | -37,005844 |
| 112 fMLP ---> superoxide                 | 111 fMLP ---> superoxide                 | -37,005844 |



|                                     |                                     |            |
|-------------------------------------|-------------------------------------|------------|
| 133 RANKL ---> AKT                  | 134 RANKL ---> AKT                  | 10,3899648 |
| 103 EDA-A2 ---> c-Jun               | 31 EDA-A2 ---> c-Jun                | 1171,75234 |
| 37 EGF ---> SHIP1                   | 35 EGF ---> SHIP1                   | 9,89525582 |
| 38 Cis ---/ PRLR                    | 36 Cis ---/ PRLR                    | 9,89525582 |
| 39 EGF ---> STAT3                   | 37 EGF ---> STAT3                   | 9,89525582 |
| 40 SOCS-1 ---/ PRL                  | 38 SOCS-1 ---/ PRL                  | 9,89525582 |
| 41 Htt ---/ Caspase-8               | 39 Htt ---/ Caspase-8               | 9,89525582 |
| 42 SOCS-3 ---/ EpoR                 | 40 SOCS-3 ---/ EpoR                 | 9,89525582 |
| 43 SOCS-3 ---/ PRLR                 | 41 SOCS-3 ---/ PRLR                 | 9,89525582 |
| 126 cyclosome regulation            | 128 cyclosome regulation            | -30,623926 |
| 218 MHC class II ---> NF-AT         | 217 MHC class II ---> NF-AT         | 5,54750372 |
| 177 LAT ---> p50:RelA               | 178 LAT ---> p50:RelA               | 7,21699069 |
| 113 PRL ---> Raf-1                  | 108 PRL ---> Raf-1                  | 8,35208957 |
| 53 Smac ---/ cIAP-2                 | 52 Smac ---/ cIAP-2                 | 6,99914314 |
| 54 SHP-2 ---> PRL                   | 53 SHP-2 ---> PRL                   | 6,99914314 |
| 55 Smac ---/ cIAP-1                 | 54 Smac ---/ cIAP-1                 | 6,99914314 |
| 56 DLK ---> c-Jun                   | 55 DLK ---> c-Jun                   | 6,99914314 |
| 57 beta-arrestin2 ---> c-Jun        | 56 beta-arrestin2 ---> c-Jun        | 6,99914314 |
| 58 ASK1 ---DUSP19---> c-Jun         | 58 ASK1 ---DUSP19---> c-Jun         | 6,99914314 |
| 59 PRL ---Gab-2---> PI3K            | 59 PRL ---Gab-2---> PI3K            | 6,99914314 |
| 60 PDGF B ---> PAK-1                | 60 PDGF B ---> PAK-1                | 6,99914314 |
| 217 BCR ---> NF-AT                  | 230 BCR ---> NF-AT                  | -17,426323 |
| 144 LAT ---> Ras                    | 136 LAT ---> Ras                    | 5,29360776 |
| 145 LAT ---> MLC                    | 137 LAT ---> MLC                    | 5,29360776 |
| 146 MHC class I ---> LAT            | 138 MHC class I ---> LAT            | 5,29360776 |
| 246 Plk1 activation and substrate   | 251 Plk1 activation and substrate   | -84,988851 |
| 247 Plk1 cell cycle regulation      | 252 Plk1 cell cycle regulation      | -84,988851 |
| 81 MKK3 ---> HNF-1alpha             | 77 MKK3 ---> HNF-1alpha             | 5,08985389 |
| 82 Epo ---> SHP-1                   | 78 Epo ---> SHP-1                   | 5,08985389 |
| 83 GH pathway                       | 79 GH pathway                       | 5,08985389 |
| 84 PDGF A ---> Crk                  | 80 PDGF A ---> Crk                  | 5,08985389 |
| 85 Apo2L ---> Caspase-10            | 81 Apo2L ---> Caspase-10            | 5,08985389 |
| 86 GH ---> Grb-2                    | 82 GH ---> Grb-2                    | 5,08985389 |
| 87 Nod1 ---> Caspase-9              | 83 Nod1 ---> Caspase-9              | 5,08985389 |
| 88 JLP ---> JNK1                    | 84 JLP ---> JNK1                    | 5,08985389 |
| 192 insulin ---Shc---> MAPK cascade | 196 insulin ---Shc---> MAPK cascade | -15,914002 |
| 194 OSM pathway                     | 199 OSM pathway                     | -13,465927 |
| 108 insulin ---Jak1---> IRS-1, IR   | 103 insulin ---Jak1---> IRS-1, IR   | 3,78638951 |
| 109 Src ---> Rap2B                  | 104 Src ---> Rap2B                  | 3,78638951 |
| 216 PRL ---Src,FAK1---> ERK         | 204 PRL ---Src,FAK1---> ERK         | 1,63845395 |
| 232 TNF-alpha ---> NFkappaB         | 233 TNF-alpha ---> NFkappaB         | 1,17677813 |
| 129 Epo ---> PIP3                   | 125 Epo ---> PIP3                   | 2,84902943 |
| 181 OSM ---> ERK                    | 183 OSM ---> ERK                    | -11,889408 |
| 253 dsRNA ---> p50:RelA             | 248 dsRNA ---> p50:RelA             | -37,832157 |
| 148 Apaf-1 ---> Caspase-7           | 148 Apaf-1 ---> Caspase-7           | 2,22135308 |
| 149 Apaf-1 ---> Caspase-3           | 149 Apaf-1 ---> Caspase-3           | 2,22135308 |
| 150 CD19 ---> PLCgamma2             | 150 CD19 ---> PLCgamma2             | 2,22135308 |
| 151 Src ---/ RhoA                   | 151 Src ---/ RhoA                   | 2,22135308 |

|                                 |                                |            |
|---------------------------------|--------------------------------|------------|
| 183 VEGF-A ---> PLA2            | 193 VEGF-A ---> PLA2           | -9,8382757 |
| 156 activin A ---> Smad2        | 157 activin A ---> Smad2       | 1,68458086 |
| 157 activin A ---> Smad3        | 158 activin A ---> Smad3       | 1,68458086 |
| 158 PRL ---Fyn---> PI3K         | 159 PRL ---Fyn---> PI3K        | 1,68458086 |
| 62 ErbB1 ---> endophilin 1      | 61 ErbB1 ---> endophilin 1     | 1,94229922 |
| 63 TAO1 ---> p38alpha           | 62 TAO1 ---> p38alpha          | 1,94229922 |
| 64 MLK2 ---> JNK1               | 63 MLK2 ---> JNK1              | 1,94229922 |
| 65 TAO2 ---MKK6---> p38alp      | 64 TAO2 ---MKK6---> p38a       | 1,94229922 |
| 66 E1 ---/ ErbB3                | 65 E1 ---/ ErbB3               | 1,94229922 |
| 67 MLK2 ---MKK3---> p38alp      | 66 MLK2 ---MKK3---> p38a       | 1,94229922 |
| 68 MLK2 ---MKK6---> p38alp      | 67 MLK2 ---MKK6---> p38a       | 1,94229922 |
| 69 TAK1 ---> p38alpha           | 68 TAK1 ---> p38alpha          | 1,94229922 |
| 70 TAO2 ---MKK3---> p38alp      | 69 TAO2 ---MKK3---> p38a       | 1,94229922 |
| 193 IFNalpha, IFNbeta ---> PI3K | 194 IFNalpha, IFNbeta ---> PI  | 0,89115428 |
| 259 BCR ---> ERK                | 264 BCR ---> ERK               | -5,8818629 |
| 230 VEGF-A ---> NO              | 231 VEGF-A ---> NO             | 0,39384767 |
| 231 insulin ---IRS---> PRK2, SH | 232 insulin ---IRS---> PRK2, S | 0,39384767 |
| 91 MEKK3 ---> ATF-2             | 87 MEKK3 ---> ATF-2            | 2,83255041 |
| 92 MEKK2 ---MKK7---> JNK1       | 88 MEKK2 ---MKK7---> JN        | 2,83255041 |
| 93 MEKK2 ---> ATF-2             | 89 MEKK2 ---> ATF-2            | 2,83255041 |
| 94 GCK ---> MKK4                | 90 GCK ---> MKK4               | 2,83255041 |
| 95 PDGF A ---> SHP-2            | 91 PDGF A ---> SHP-2           | 2,83255041 |
| 96 MKK4 ---> c-Jun              | 92 MKK4 ---> c-Jun             | 2,83255041 |
| 97 PDGF B ---> PKR              | 93 PDGF B ---> PKR             | 2,83255041 |
| 98 TAK1 ---> c-Jun              | 94 TAK1 ---> c-Jun             | 2,83255041 |
| 99 p38alpha ---> STAT3          | 95 p38alpha ---> STAT3         | 2,83255041 |
| 100 JNK2 ---> doublecortin      | 96 JNK2 ---> doublecortin      | 2,83255041 |
| 101 Epo ---Lyn---> STAT5A       | 97 Epo ---Lyn---> STAT5A       | 2,83255041 |
| 102 MEKK2 ---> ATF-2            | 98 MEKK2 ---> ATF-2            | 2,83255041 |
| 254 mTOR ----> S6, eIF-4E       | 249 mTOR ----> S6, eIF-4E      | -0,0546737 |
| 261 ZAP-70 ---> Elk-1           | 260 ZAP-70 ---> Elk-1          | -0,2583148 |
| 262 PDGF A ---> ERK             | 261 PDGF A ---> ERK            | -0,2583148 |
| 263 AKT, MAPKAPK2 ---/ tube     | 262 AKT, MAPKAPK2 ---/ tu      | -0,2583148 |
| 264 PDGF B ---> ERK             | 263 PDGF B ---> ERK            | -0,2583148 |
| 117 MKP-5 ---/ p53; MKK4 --->   | 112 MKP-5 ---/ p53; MKK4 --    | 0,89881411 |
| 118 VEGF-A ---> Ras             | 113 VEGF-A ---> Ras            | 0,89881411 |
| 119 PRL ---> Jak2               | 115 PRL ---> Jak2              | 0,89881411 |
| 120 PDGF B ---> Src             | 116 PDGF B ---> Src            | 0,89881411 |
| 121 PDGF A ---> Src             | 117 PDGF A ---> Src            | 0,89881411 |
| 122 SHP-1 ---/ ErbB1            | 118 SHP-1 ---/ ErbB1           | 0,89881411 |
| 123 CD148 ---/ PDGFRbeta        | 119 CD148 ---/ PDGFRbeta       | 0,89881411 |
| 124 PRL ---Jak2---> STAT5A      | 120 PRL ---Jak2---> STAT5A     | 0,89881411 |
| 125 Unc18-1 ---/ PLD2           | 121 Unc18-1 ---/ PLD2          | 0,89881411 |
| 241 beta-catenin network        | 247 beta-catenin network       | -4,6051022 |

|                                    |                                    |            |
|------------------------------------|------------------------------------|------------|
| 134 MLK2 ---> NeuroD               | 139 MLK2 ---> NeuroD               | 0,60393518 |
| 135 PRL ---Src---> STAT5B          | 140 PRL ---Src---> STAT5B          | 0,60393518 |
| 136 Smac ---> Caspase-3            | 141 Smac ---> Caspase-3            | 0,60393518 |
| 137 PTEN ---/ AKT-1                | 142 PTEN ---/ AKT-1                | 0,60393518 |
| 138 Smurf-1 ---/ Smad7, TGFbet     | 143 Smurf-1 ---/ Smad7, TGFbet     | 0,60393518 |
| 139 Epo ---> STAT5                 | 144 Epo ---> STAT5                 | 0,60393518 |
| 140 Htt ---> Ca                    | 145 Htt ---> Ca                    | 0,60393518 |
| 141 EDAR ---> TRAF2                | 146 EDAR ---> TRAF2                | 0,60393518 |
| 142 ASK1 ---MKK4---> JNK1          | 147 ASK1 ---MKK4---> JNK1          | 313,010371 |
| 143 Fas ---/ Cdc42                 | 147 Fas ---/ Cdc42                 | 0,60393518 |
| 250 VEGF-A ---/ Caspase-9, Bac     | 254 VEGF-A ---/ Caspase-9, E       | -3,8067835 |
| 251 IL-12 - STAT4 pathway          | 255 IL-12 - STAT4 pathway          | -3,8067835 |
| 252 IL-12 ---> STAT4               | 256 IL-12 ---> STAT4               | -3,8067835 |
| 174 PDGF B ---> STATs              | 174 PDGF B ---> STATs              | 0,37977694 |
| 175 JNK1 ---> Bax                  | 175 JNK1 ---> Bax                  | 0,37977694 |
| 176 Htt ---> NeuroD                | 176 Htt ---> NeuroD                | 0,37977694 |
| 260 IFNalpha, IFNbeta ---> STA     | 266 IFNalpha, IFNbeta ---> S1      | -3,1458735 |
| 195 PDGF B ---SHP-2---> Ras; I     | 124 PDGF B ---SHP-2---> Ras        | 165,760901 |
| 196 BMP7 ---> Smad1, Smad5, 8      | 197 BMP7 ---> Smad1, Smad5, 8      | 0,0911284  |
| 197 SLP-65 ---/ Raf-1              | 198 SLP-65 ---/ Raf-1              | 0,0911284  |
| 198 PDGF B---/ Ras                 | 126 PDGF B---/ Ras                 | 165,760901 |
| 219 IL-22 ---> STAT1alpha, STAT3   | 219 IL-22 ---> STAT1alpha, S       | -0,0369076 |
| 220 Fer ---> beta-cateninp{ Tyr142 | 220 Fer ---> beta-cateninp{ Tyr142 | -0,0369076 |
| 221 PDGF A ---> AKT-1              | 221 PDGF A ---> AKT-1              | -0,0369076 |
| 222 IL-22 pathway                  | 222 IL-22 pathway                  | -0,0369076 |
| 223 IFNalpha, IFNbeta ---> STA     | 223 IFNalpha, IFNbeta ---> S1      | -0,0369076 |
| 224 IL-10 pathway                  | 224 IL-10 pathway                  | -0,0369076 |
| 225 PDK1 ---> 4E-BP1, p70S6K       | 225 PDK1 ---> 4E-BP1, p70S6K       | -0,0369076 |
| 226 PDGF B ---> AKT-1              | 226 PDGF B ---> AKT-1              | -0,0369076 |
| 227 EGF ---> PLD2                  | 227 EGF ---> PLD2                  | -0,0369076 |
| 228 IL-10 ---> STAT1alpha, STAT3   | 228 IL-10 ---> STAT1alpha, S       | -0,0369076 |
| 229 CHIP ---/ Pael-R               | 229 CHIP ---/ Pael-R               | -0,0369076 |
| 199 PDGF A ---> DAG, IP3           | 201 PDGF A ---> DAG, IP3           | -3,346038  |
| 200 PDGF B --> DAG, IP3            | 202 PDGF B --> DAG, IP3            | -3,346038  |
| 201 PI3K ---/ p53                  | 203 PI3K ---/ p53                  | -3,346038  |
| 242 TGFbeta ---> Smad2, Smad3      | 240 TGFbeta ---> Smad2, Smad3      | -0,1549776 |
| 243 EGF ---> DAG, IP3              | 241 EGF ---> DAG, IP3              | -0,1549776 |
| 244 Src ---> Rac1                  | 242 Src ---> Rac1                  | -0,1549776 |
| 245 Rac1 ---> c-Jun, Elk-1         | 243 Rac1 ---> c-Jun, Elk-1         | -0,1549776 |
| 272 G2/M phase (cyclin A:Cdk1)     | 273 G2/M phase (cyclin A:Cdk1)     | -2,5988127 |
| 255 Csk, CD45 ---> Lck             | 250 Csk, CD45 ---> Lck             | 0,57268268 |
| 268 Csk, CD45 ---> Fyn             | 265 Csk, CD45 ---> Fyn             | -0,3224388 |
| 46 Trx ---/ ASK1                   | 44 Trx ---/ ASK1                   | 0,222805   |
| 239 IL-4 - STAT6 pathway           | 245 IL-4 - STAT6 pathway           | -2,1229082 |

|                                  |                                 |            |
|----------------------------------|---------------------------------|------------|
| 240 IL-4 ---> STAT6              | 246 IL-4 ---> STAT6             | -2,1229082 |
| 131 MKK6 ---> Hsp27              | 131 MKK6 ---> Hsp27             | 0,00857231 |
| 265 Caspase-3 ---/ p53           | 267 Caspase-3 ---/ p53          | -1,3340079 |
| 266 IL-8 ---> ERK2               | 268 IL-8 ---> ERK2              | -1,3340079 |
| 267 Eps15 ---> ErbB internalizat | 269 Eps15 ---> ErbB internaliz  | -1,3340079 |
| 161 MEK-1 ---> HIF-1alpha        | 160 MEK-1 ---> HIF-1alpha       | -0,0395507 |
| 162 MKK6 ---/ MRF4               | 161 MKK6 ---/ MRF4              | -0,0395507 |
| 163 p38alpha ---> CREB           | 162 p38alpha ---> CREB          | -0,0395507 |
| 164 E1 ---/ alpha-tubulin        | 163 E1 ---/ alpha-tubulin       | -0,0395507 |
| 165 MKK6 ---> p53                | 164 MKK6 ---> p53               | -0,0395507 |
| 166 MKK4 ---/ RXR-alpha          | 165 MKK4 ---/ RXR-alpha         | -0,0395507 |
| 167 MKK4 ---p38alpha---> ATF     | 166 MKK4 ---p38alpha---> ATF    | -0,0395507 |
| 168 E1 ---/ synaptotagmin-11     | 167 E1 ---/ synaptotagmin-11    | -0,0395507 |
| 169 E1 ---/ beta-tubulin         | 168 E1 ---/ beta-tubulin        | -0,0395507 |
| 170 E1 ---/ Septin5              | 169 E1 ---/ Septin5             | -0,0395507 |
| 171 E1 ---dorfin---/ synphilin-1 | 170 E1 ---dorfin---/ synphilin- | -0,0395507 |
| 172 MEKK4 ---> JNK1              | 171 MEKK4 ---> JNK1             | -0,0395507 |
| 173 E1 ---parkin---/ synphilin-1 | 172 E1 ---parkin---/ synphilin- | -0,0395507 |
| 184 inhibitory phosphorylation o | 185 inhibitory phosphorylator   | -0,0883916 |
| 185 MKK7 ---> c-Jun              | 186 MKK7 ---> c-Jun             | -0,0883916 |
| 186 Fas ---> Caspase-8           | 188 Fas ---> Caspase-8          | -0,0883916 |
| 187 PP2Calpha ---/ MKK4          | 189 PP2Calpha ---/ MKK4         | -0,0883916 |
| 188 PP2Calpha ---/ MKK6          | 190 PP2Calpha ---/ MKK6         | -0,0883916 |
| 189 Caspase-6 ---> Caspase-3     | 191 Caspase-6 ---> Caspase-3    | -0,0883916 |
| 190 MEKK4 --MKK6---> ATF-2       | 192 MEKK4 --MKK6---> ATF        | -0,0883916 |
| 273 IL-2 ---> STAT5              | 274 IL-2 ---> STAT5             | -1,0527245 |
| 274 IL-2 - STAT5 pathway         | 275 IL-2 - STAT5 pathway        | -1,0527245 |
| 275 OSM ---> STAT1               | 276 OSM ---> STAT1              | -1,0527245 |
| 276 c-Kit pathway                | 277 c-Kit pathway               | -1,0527245 |
| 205 Rac1 ---/ cofilin            | 206 Rac1 ---/ cofilin           | -0,1344245 |
| 206 Fas ---> Abl                 | 207 Fas ---> Abl                | -0,1344245 |
| 207 E1 ---/ alpha-synuclein      | 208 E1 ---/ alpha-synuclein     | -0,1344245 |
| 208 PKCdelta ---> GRK2           | 114 PKCdelta ---> GRK2          | 95,3165996 |
| 209 VEGF-A ---> STAT1alpha       | 209 VEGF-A ---> STAT1alph       | -0,1344245 |
| 210 EGF ---> N-WASP              | 210 EGF ---> N-WASP             | -0,1344245 |
| 211 LMW-PTP ---/ VEGFR-1         | 211 LMW-PTP ---/ VEGFR-1        | -0,1344245 |
| 212 Fas ---/ SRF                 | 212 Fas ---/ SRF                | -0,1344245 |
| 213 Fas ---/ NuMA                | 213 Fas ---/ NuMA               | -0,1344245 |
| 214 xolloid ---> BMP4            | 214 xolloid ---> BMP4           | -0,1344245 |
| 215 Rac1 ---> p38                | 215 Rac1 ---> p38               | -0,1344245 |
| 234 Fas ---/ PRK2                | 235 Fas ---/ PRK2               | -0,1806617 |
| 235 E1 ---/ cyclin E             | 236 E1 ---/ cyclin E            | -0,1806617 |
| 236 Rac1 ---> golgin-160         | 237 Rac1 ---> golgin-160        | -0,1806617 |
| 237 MKK4 ---/ PPAR-gamma         | 238 MKK4 ---/ PPAR-gamma        | -0,1806617 |
| 238 PDGF B ---> cortactin        | 239 PDGF B ---> cortactin       | -0,1806617 |

|                            |                            |            |
|----------------------------|----------------------------|------------|
| 269 Rac1 ---MLK3---> c-Jun | 270 Rac1 ---MLK3---> c-Jun | -0,2492288 |
| 270 HB-EGF ---> PI3K       | 271 HB-EGF ---> PI3K       | -0,2492288 |
| 271 c-Jun degradation      | 272 c-Jun degradation      | -0,2492288 |
| 256 POSH ---> JNK1, JNK2   | 257 POSH ---> JNK1, JNK2   | -0,2064972 |
| 257 Fas ---> Caspase-2     | 258 Fas ---> Caspase-2     | -0,2064972 |
| 258 Ubc9 ---/ p73alpha     | 259 Ubc9 ---/ p73alpha     | -0,2064972 |

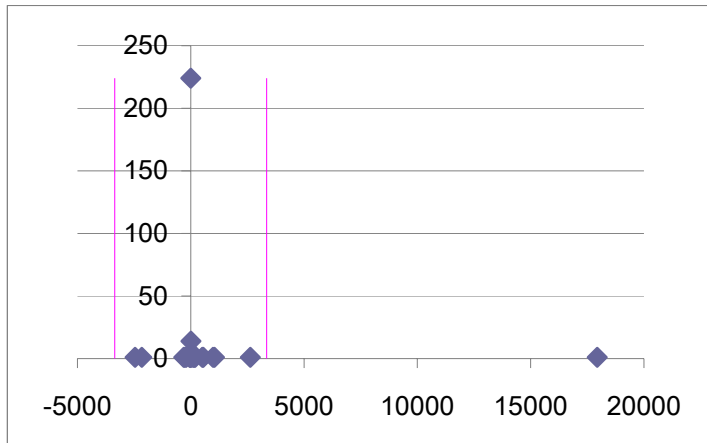

### High vs Control 3 table 9

| Control Rank | Pathway name                 | Sample Rank | Pathway name                 | Delta Score |
|--------------|------------------------------|-------------|------------------------------|-------------|
|              | 1 stress-associated pathways |             | 1 stress-associated pathways | 11638894,74 |
| 4            | EGF pathway                  | 7           | EGF pathway                  | -421019,221 |
| 3            | JNK pathway                  | 2           | JNK pathway                  | 408190,0671 |
| 7            | Fas pathway                  | 3           | Fas pathway                  | 257878,6016 |
| 2            | p38 pathway                  | 4           | p38 pathway                  | -80286,3689 |
| 8            | Epo pathway                  | 9           | Epo pathway                  | -35718,3477 |
| 5            | RANKL pathway                | 6           | RANKL pathway                | -34506,4449 |
| 17           | PRL pathway                  | 19          | PRL pathway                  | -21196,9787 |
| 31           | Caspase network              | 21          | Caspase network              | 74266,12147 |
| 12           | LPS ---> p38                 | 13          | LPS ---> p38                 | -10519,0684 |
| 13           | LPS ---> JNK                 | 14          | LPS ---> JNK                 | -7577,86852 |
| 6            | BMP2 ---> p38alpha           | 5           | BMP2 ---> p38alpha           | -4465,03542 |
| 14           | neurotensin pathway          | 10          | neurotensin pathway          | 5923,723254 |
| 24           | Apo2L pathway                | 26          | Apo2L pathway                | -3983,95855 |
| 47           | TLR4 pathway                 | 34          | TLR4 pathway                 | 8578,951192 |
| 105          | T-cell antigen receptor path | 115         | T-cell antigen receptor pat  | -3042,03239 |
| 50           | TGFbeta pathway              | 110         | TGFbeta pathway              | -8633,85607 |
| 10           | JNK1 ---> MKK4               | 11          | JNK1 ---> MKK4               | -1990,74804 |
| 11           | TAK1 ---> ATF-2              | 12          | TAK1 ---> ATF-2              | -1990,74804 |
| 19           | IL-8 pathway                 | 17          | IL-8 pathway                 | 2746,78557  |
| 116          | insulin pathway              | 130         | insulin pathway              | -1609,08361 |
| 15           | RANKL ---> MITF              | 16          | RANKL ---> MITF              | -1331,81168 |
| 110          | B-cell antigen receptor path | 120         | B-cell antigen receptor pat  | -1358,61802 |
| 45           | LPS ---> NF-kappaB           | 49          | LPS ---> NF-kappaB           | -1202,23505 |
| 20           | Epo ---> ERK1                | 20          | Epo ---> ERK1                | -973,443782 |
| 9            | EGF ---> PAK1                | 8           | EGF ---> PAK1                | -685,442109 |
| 104          | PDGF pathway                 | 80          | PDGF pathway                 | 3139,422309 |
| 147          | E2F network                  | 131         | E2F network                  | 1014,812816 |
| 16           | wnt pathway                  | 15          | wnt pathway                  | 1051,382056 |
| 106          | TLR3 pathway                 | 81          | TLR3 pathway                 | 2821,843368 |
| 48           | alpha Iib beta3 pathway      | 53          | alpha Iib beta3 pathway      | -646,316961 |
| 49           | alpha Iib beta3 ---> Rac1    | 54          | alpha Iib beta3 ---> Rac1    | -646,316961 |
| 25           | EGF ---> ERK                 | 27          | EGF ---> ERK                 | -560,842178 |
| 127          | IL-1 pathway                 | 139         | IL-1 pathway                 | -477,760138 |
| 21           | ZAP-70 ---> c-Jun            | 23          | ZAP-70 ---> c-Jun            | -450,52295  |
| 36           | fMLP pathway                 | 33          | fMLP pathway                 | 513,5622813 |
| 34           | IL-1beta ---> c-Jun          | 38          | IL-1beta ---> c-Jun          | -349,631585 |
| 30           | parkin associated pathways   | 76          | parkin associated pathway    | -1126,86662 |
| 61           | IL-1beta ---> Elk-1          | 77          | IL-1beta ---> Elk-1          | -317,672939 |
| 202          | p53 pathway                  | 193         | p53 pathway                  | 306,6909574 |
| 22           | EGF ---> PI3K-C2beta         | 24          | EGF ---> PI3K-C2beta         | -266,446045 |
| 23           | RANKL ---> JNK1              | 25          | RANKL ---> JNK1              | -266,446045 |
| 32           | Epo ---> IP3, PtsIns(3,4)P   | 35          | Epo ---> IP3, PtsIns(3,4)P   | -262,233367 |
| 18           | c-Cbl ---/ ErBB1             | 18          | c-Cbl ---/ ErBB1             | -227,747181 |
| 78           | RhoA ---> stress fiber forma | 78          | RhoA ---> stress fiber forr  | 302,7740532 |
| 79           | RhoA pathway                 | 79          | RhoA pathway                 | 302,7740532 |

|                                 |                                 |             |
|---------------------------------|---------------------------------|-------------|
| 44 IFNgamma ---> STAT1alph      | 22 IFNgamma ---> STAT1alp       | 3354,003582 |
| 28 FasL ---> Caspase-3          | 31 FasL ---> Caspase-3          | -195,307777 |
| 29 EGF ---> c-Fos               | 32 EGF ---> c-Fos               | -195,307777 |
| 130 TNF-alpha pathway           | 96 TNF-alpha pathway            | 1289,819898 |
| 179 IL-1beta ---> p50:RelA      | 190 IL-1beta ---> p50:RelA      | -158,226952 |
| 33 LAT ---> PKCtheta            | 37 LAT ---> PKCtheta            | -147,96791  |
| 132 Rac1 pathway                | 141 Rac1 pathway                | -130,377938 |
| 178 IFN pathway                 | 140 IFN pathway                 | 777,8584084 |
| 114 BCR ---> c-Jun              | 119 BCR ---> c-Jun              | -119,925934 |
| 89 dsRNA ---> IKK-alpha:IKK     | 39 dsRNA ---> IKK-alpha:IK      | 1609,377347 |
| 72 Aurora-A cell cycle regulati | 55 Aurora-A cell cycle regula   | 127,4447782 |
| 73 PPAR pathway                 | 56 PPAR pathway                 | 127,4447782 |
| 74 Aurora-A activation, substr  | 57 Aurora-A activation, subst   | 127,4447782 |
| 71 dsRNA ---> c-Jun             | 30 dsRNA ---> c-Jun             | 1824,774994 |
| 182 EDAR pathway                | 152 EDAR pathway                | 581,5102232 |
| 233 VEGF-A pathway              | 242 VEGF-A pathway              | -60,5240533 |
| 35 JIP-1 ---> APP               | 40 JIP-1 ---> APP               | -77,4224759 |
| 159 G1 phase (Cdk2)             | 161 G1 phase (Cdk2)             | 86,99903553 |
| 80 LAT ---> cofilin             | 86 LAT ---> cofilin             | -74,7857334 |
| 128 BCR ---> p38                | 136 BCR ---> p38                | -78,5815373 |
| 90 cyclosome regulatory netwo   | 85 cyclosome regulatory netw    | 84,57769281 |
| 248 tuberin pathway             | 258 tuberin pathway             | -42,8432818 |
| 191 G2/M phase (cyclin B:Cdk1   | 202 G2/M phase (cyclin B:Cdk    | -51,0550984 |
| 51 Apo2L ---Caspase-8---> Ca:   | 51 Apo2L ---Caspase-8---> C     | -59,1443205 |
| 52 PRL ---IRS---> PI3K          | 52 PRL ---IRS---> PI3K          | -59,1443205 |
| 152 BCR ---MLK3---> c-Jun       | 162 BCR ---MLK3---> c-Jun       | -53,1487262 |
| 153 BCR ---> cytoskeletal reorg | 163 BCR ---> cytoskeletal reor  | -53,1487262 |
| 154 insulin ---> glucose uptake | 164 insulin ---> glucose uptake | -53,1487262 |
| 204 S phase (Cdk2)              | 209 S phase (Cdk2)              | 53,7410845  |
| 155 HIF-1alpha pathway          | 203 HIF-1alpha pathway          | -128,219242 |
| 26 EGF ---> STAT1alpha          | 28 EGF ---> STAT1alpha          | -52,1477859 |
| 27 ASK1 ---> p38alpha           | 29 ASK1 ---> p38alpha           | -52,1477859 |
| 115 PRL ---PI3K---> AKT         | 118 PRL ---PI3K---> AKT         | -52,0505579 |
| 107 p73 pathway                 | 95 p73 pathway                  | 68,81829163 |
| 160 Htt pathway                 | 186 Htt pathway                 | -46,8627297 |
| 249 insulin ---> AKT-1 pathway  | 241 insulin ---> AKT-1 pathw    | 40,55207932 |
| 180 IFNalpha, IFNbeta, IFNgam   | 135 IFNalpha, IFNbeta, IFNga    | 491,8541315 |
| 75 TNF-alpha ---> c-Jun         | 82 TNF-alpha ---> c-Jun         | -46,5874563 |
| 76 Caspase-9 ---> Caspases      | 83 Caspase-9 ---> Caspases      | -46,5874563 |
| 77 PRL ---> PAK1                | 84 PRL ---> PAK1                | -46,5874563 |
| 111 G-alpha-q ---> arachidonic  | 111 G-alpha-q ---> arachidonic  | 55,94122313 |
| 112 fMLP ---> superoxide        | 112 fMLP ---> superoxide        | 55,94122313 |

|                                   |                                   |             |
|-----------------------------------|-----------------------------------|-------------|
| 133 RANKL ---> AKT                | 151 RANKL ---> AKT                | -38,1523691 |
| 103 EDA-A2 ---> c-Jun             | 36 EDA-A2 ---> c-Jun              | 952,0375839 |
| 37 EGF ---> SHIP1                 | 41 EGF ---> SHIP1                 | -36,4183769 |
| 38 Cis ---/ PRLR                  | 42 Cis ---/ PRLR                  | -36,4183769 |
| 39 EGF ---> STAT3                 | 43 EGF ---> STAT3                 | -36,4183769 |
| 40 SOCS-1 ---/ PRL                | 44 SOCS-1 ---/ PRL                | -36,4183769 |
| 41 Htt ---/ Caspase-8             | 45 Htt ---/ Caspase-8             | -36,4183769 |
| 42 SOCS-3 ---/ EpoR               | 46 SOCS-3 ---/ EpoR               | -36,4183769 |
| 43 SOCS-3 ---/ PRLR               | 47 SOCS-3 ---/ PRLR               | -36,4183769 |
| 126 cyclosome regulation          | 116 cyclosome regulation          | 45,42282264 |
| 218 MHC class II ---> NF-AT       | 234 MHC class II ---> NF-AT       | -27,3708905 |
| 177 LAT ---> p50:RelA             | 188 LAT ---> p50:RelA             | -29,280262  |
| 113 PRL ---> Raf-1                | 117 PRL ---> Raf-1                | -31,112375  |
| 53 Smac ---/ cIAP-2               | 58 Smac ---/ cIAP-2               | -26,9600855 |
| 54 SHP-2 ---> PRL                 | 59 SHP-2 ---> PRL                 | -26,9600855 |
| 55 Smac ---/ cIAP-1               | 60 Smac ---/ cIAP-1               | -26,9600855 |
| 56 DLK ---> c-Jun                 | 61 DLK ---> c-Jun                 | -26,9600855 |
| 57 beta-arrestin2 ---> c-Jun      | 62 beta-arrestin2 ---> c-Jun      | -26,9600855 |
| 58 ASK1 ---DUSP19---> c-Jun       | 64 ASK1 ---DUSP19---> c-Jun       | -26,9600855 |
| 59 PRL ---Gab-2---> PI3K          | 65 PRL ---Gab-2---> PI3K          | -26,9600855 |
| 60 PDGF B ---> PAK-1              | 66 PDGF B ---> PAK-1              | -26,9600855 |
| 217 BCR ---> NF-AT                | 210 BCR ---> NF-AT                | 22,44542492 |
| 144 LAT ---> Ras                  | 153 LAT ---> Ras                  | -22,2804274 |
| 145 LAT ---> MLC                  | 154 LAT ---> MLC                  | -22,2804274 |
| 146 MHC class I ---> LAT          | 155 MHC class I ---> LAT          | -22,2804274 |
| 246 Plk1 activation and substrat  | 256 Plk1 activation and substrat  | -15,3559823 |
| 247 Plk1 cell cycle regulation    | 257 Plk1 cell cycle regulation    | -15,3559823 |
| 81 MKK3 ---> HNF-1alpha           | 87 MKK3 ---> HNF-1alpha           | -20,8706987 |
| 82 Epo ---> SHP-1                 | 88 Epo ---> SHP-1                 | -20,8706987 |
| 83 GH pathway                     | 89 GH pathway                     | -20,8706987 |
| 84 PDGF A ---> Crk                | 90 PDGF A ---> Crk                | -20,8706987 |
| 85 Apo2L ---> Caspase-10          | 91 Apo2L ---> Caspase-10          | -20,8706987 |
| 86 GH ---> Grb-2                  | 92 GH ---> Grb-2                  | -20,8706987 |
| 87 Nod1 ---> Caspase-9            | 93 Nod1 ---> Caspase-9            | -20,8706987 |
| 88 JLP ---> JNK1                  | 94 JLP ---> JNK1                  | -20,8706987 |
| 192 insulin ---Shc---> MAPK ca    | 191 insulin ---Shc---> MAPK ca    | 24,41354329 |
| 194 OSM pathway                   | 201 OSM pathway                   | 17,30490127 |
| 108 insulin ---Jak1---> IRS-1, IF | 113 insulin ---Jak1---> IRS-1, IF | -16,7124695 |
| 109 Src ---> Rap2B                | 114 Src ---> Rap2B                | -16,7124695 |
| 216 PRL ---Src,FAK1---> ERK       | 223 PRL ---Src,FAK1---> ERK       | -11,8008592 |
| 232 TNF-alpha ---> NFkappaB       | 187 TNF-alpha ---> NFkappaB       | 200,346878  |
| 129 Epo ---> PIP3                 | 133 Epo ---> PIP3                 | -13,7400603 |
| 181 OSM ---> ERK                  | 181 OSM ---> ERK                  | 15,65195708 |
| 253 dsRNA ---> p50:RelA           | 207 dsRNA ---> p50:RelA           | 165,2506667 |
| 148 Apaf-1 ---> Caspase-7         | 156 Apaf-1 ---> Caspase-7         | -11,6029329 |
| 149 Apaf-1 ---> Caspase-3         | 157 Apaf-1 ---> Caspase-3         | -11,6029329 |
| 150 CD19 ---> PLCgamma2           | 158 CD19 ---> PLCgamma2           | -11,6029329 |
| 151 Src ---/ RhoA                 | 160 Src ---/ RhoA                 | -11,6029329 |



|                                 |                                |             |
|---------------------------------|--------------------------------|-------------|
| 183 VEGF-A ---> PLA2            | 189 VEGF-A ---> PLA2           | 12,56294249 |
| 156 activin A ---> Smad2        | 178 activin A ---> Smad2       | -9,9262019  |
| 157 activin A ---> Smad3        | 179 activin A ---> Smad3       | -9,9262019  |
| 158 PRL ---Fyn---> PI3K         | 180 PRL ---Fyn---> PI3K        | -9,9262019  |
| 62 ErbB1 ---> endophilin 1      | 67 ErbB1 ---> endophilin 1     | -10,1507069 |
| 63 TAO1 ---> p38alpha           | 68 TAO1 ---> p38alpha          | -10,1507069 |
| 64 MLK2 ---> JNK1               | 69 MLK2 ---> JNK1              | -10,1507069 |
| 65 TAO2 ---MKK6---> p38alp      | 70 TAO2 ---MKK6---> p38al      | -10,1507069 |
| 66 E1 ---/ ErbB3                | 71 E1 ---/ ErbB3               | -10,1507069 |
| 67 MLK2 ---MKK3---> p38alp      | 72 MLK2 ---MKK3---> p38a       | -10,1507069 |
| 68 MLK2 ---MKK6---> p38alp      | 73 MLK2 ---MKK6---> p38a       | -10,1507069 |
| 69 TAK1 ---> p38alpha           | 74 TAK1 ---> p38alpha          | -10,1507069 |
| 70 TAO2 ---MKK3---> p38alp      | 75 TAO2 ---MKK3---> p38al      | -10,1507069 |
| 193 IFNalpha, IFNbeta ---> PI3I | 208 IFNalpha, IFNbeta ---> PI  | -7,54161724 |
| 203 LPS ----> IRF-3:IRF-7:CBP:  | 269 LPS ----> IRF-3:IRF-7:CB   | -12,4158796 |
| 259 BCR ---> ERK                | 259 BCR ---> ERK               | 6,21748444  |
| 230 VEGF-A ---> NO              | 239 VEGF-A ---> NO             | -6,03018935 |
| 231 insulin ---IRS---> PRK2, SF | 240 insulin ---IRS---> PRK2, S | -6,03018935 |
| 91 MEKK3 ---> ATF-2             | 97 MEKK3 ---> ATF-2            | -7,65084169 |
| 92 MEKK2 ---MKK7---> JNK        | 98 MEKK2 ---MKK7---> JN        | -7,65084169 |
| 93 MEKK2 ---> ATF-2             | 99 MEKK2 ---> ATF-2            | -7,65084169 |
| 94 GCK ---> MKK4                | 100 GCK ---> MKK4              | -7,65084169 |
| 95 PDGF A ---> SHP-2            | 101 PDGF A ---> SHP-2          | -7,65084169 |
| 96 MKK4 ---> c-Jun              | 102 MKK4 ---> c-Jun            | -7,65084169 |
| 97 PDGF B ---> PKR              | 103 PDGF B ---> PKR            | -7,65084169 |
| 98 TAK1 ---> c-Jun              | 104 TAK1 ---> c-Jun            | -7,65084169 |
| 99 p38alpha ---> STAT3          | 105 p38alpha ---> STAT3        | -7,65084169 |
| 100 JNK2 ---> doublecortin      | 106 JNK2 ---> doublecortin     | -7,65084169 |
| 101 Epo ---Lyn---> STAT5A       | 107 Epo ---Lyn---> STAT5A      | -7,65084169 |
| 102 MEKK2 ---> ATF-2            | 109 MEKK2 ---> ATF-2           | -7,65084169 |
| 254 mTOR ----> S6, eIF-4E       | 260 mTOR ----> S6, eIF-4E      | -4,87073307 |
| 261 ZAP-70 ---> Elk-1           | 276 ZAP-70 ---> Elk-1          | -12,0651295 |
| 262 PDGF A ---> ERK             | 277 PDGF A ---> ERK            | -12,0651295 |
| 263 AKT, MAPKAPK2 ---/ tube     | 278 AKT, MAPKAPK2 ---/ tu      | -12,0651295 |
| 264 PDGF B ---> ERK             | 279 PDGF B ---> ERK            | -12,0651295 |
| 117 MKP-5 ---/ p53; MKK4 --->   | 121 MKP-5 ---/ p53; MKK4 --    | -6,0660348  |
| 118 VEGF-A ---> Ras             | 122 VEGF-A ---> Ras            | -6,0660348  |
| 119 PRL ---> Jak2               | 123 PRL ---> Jak2              | -6,0660348  |
| 120 PDGF B ---> Src             | 124 PDGF B ---> Src            | -6,0660348  |
| 121 PDGF A ---> Src             | 125 PDGF A ---> Src            | -6,0660348  |
| 122 SHP-1 ---/ ErbB1            | 126 SHP-1 ---/ ErbB1           | -6,0660348  |
| 123 CD148 ---/ PDGFRbeta        | 127 CD148 ---/ PDGFRbeta       | -6,0660348  |
| 124 PRL ---Jak2---> STAT5A      | 128 PRL ---Jak2---> STAT5A     | -6,0660348  |
| 125 Unc18-1 ---/ PLD2           | 129 Unc18-1 ---/ PLD2          | -6,0660348  |

|                                  |                                 |             |
|----------------------------------|---------------------------------|-------------|
| 241 beta-catenin network         | 238 beta-catenin network        | 5,022768484 |
| 134 MLK2 ---> NeuroD             | 142 MLK2 ---> NeuroD            | -4,98757058 |
| 135 PRL ---Src---> STAT5B        | 143 PRL ---Src---> STAT5B       | -4,98757058 |
| 136 Smac ---> Caspase-3          | 144 Smac ---> Caspase-3         | -4,98757058 |
| 137 PTEN ---/ AKT-1              | 145 PTEN ---/ AKT-1             | -4,98757058 |
| 138 Smurf-1 ---/ Smad7, TGFbe    | 146 Smurf-1 ---/ Smad7, TGFt    | -4,98757058 |
| 139 Epo ---> STAT5               | 147 Epo ---> STAT5              | -4,98757058 |
| 140 Htt ---> Ca                  | 148 Htt ---> Ca                 | -4,98757058 |
| 141 EDAR ---> TRAF2              | 149 EDAR ---> TRAF2             | -4,98757058 |
| 142 ASK1 ---MKK4---> JNK1        | 63 ASK1 ---MKK4---> JNK1        | 273,5429397 |
| 143 Fas ---/ Cdc42               | 150 Fas ---/ Cdc42              | -4,98757058 |
| 250 VEGF-A ---/ Caspase-9, Ba    | 253 VEGF-A ---/ Caspase-9, B    | 3,942721258 |
| 251 IL-12 - STAT4 pathway        | 254 IL-12 - STAT4 pathway       | 3,942721258 |
| 252 IL-12 ---> STAT4             | 255 IL-12 ---> STAT4            | 3,942721258 |
| 174 PDGF B ---> STATs            | 182 PDGF B ---> STATs           | -4,20867453 |
| 175 JNK1 ---> Bax                | 183 JNK1 ---> Bax               | -4,20867453 |
| 176 Htt ---> NeuroD              | 184 Htt ---> NeuroD             | -4,20867453 |
| 260 IFNalpha, IFNbeta ---> STA   | 261 IFNalpha, IFNbeta ---> S1   | 3,072845791 |
| 195 PDGF B ---SHP-2---> Ras;     | 132 PDGF B ---SHP-2---> Ras     | 146,2393973 |
| 196 BMP7 ---> Smad1, Smad5,      | 271 BMP7 ---> Smad1, Smad5      | -51,9405303 |
| 197 SLP-65 ---/ Raf-1            | 211 SLP-65 ---/ Raf-1           | -3,20594827 |
| 198 PDGF B---/ Ras               | 134 PDGF B---/ Ras              | 146,2393973 |
| 219 IL-22 ---> STAT1alpha, ST.   | 224 IL-22 ---> STAT1alpha, S    | -2,83691293 |
| 220 Fer ---> beta-cateninp{Tyr1. | 225 Fer ---> beta-cateninp{Tyr1 | -2,83691293 |
| 221 PDGF A ---> AKT-1            | 226 PDGF A ---> AKT-1           | -2,83691293 |
| 222 IL-22 pathway                | 227 IL-22 pathway               | -2,83691293 |
| 223 IFNalpha, IFNbeta ---> STA   | 228 IFNalpha, IFNbeta ---> S1   | -2,83691293 |
| 224 IL-10 pathway                | 229 IL-10 pathway               | -2,83691293 |
| 225 PDK1 ---> 4E-BP1, p70S6K     | 230 PDK1 ---> 4E-BP1, p70S6     | -2,83691293 |
| 226 PDGF B ---> AKT-1            | 231 PDGF B ---> AKT-1           | -2,83691293 |
| 227 EGF ---> PLD2                | 232 EGF ---> PLD2               | -2,83691293 |
| 228 IL-10 ---> STAT1alpha, ST.   | 233 IL-10 ---> STAT1alpha, S    | -2,83691293 |
| 229 CHIP ---/ Pael-R             | 159 CHIP ---/ Pael-R            | 123,1473181 |
| 199 PDGF A ---> DAG, IP3         | 204 PDGF A ---> DAG, IP3        | 3,757247459 |
| 200 PDGF B --> DAG, IP3          | 205 PDGF B --> DAG, IP3         | 3,757247459 |
| 201 PI3K ---/ p53                | 206 PI3K ---/ p53               | 3,757247459 |
| 242 TGFbeta ---> Smad2, Smad.    | 249 TGFbeta ---> Smad2, Sma     | -2,52671405 |
| 243 EGF ---> DAG, IP3            | 250 EGF ---> DAG, IP3           | -2,52671405 |
| 244 Src ---> Rac1                | 251 Src ---> Rac1               | -2,52671405 |
| 245 Rac1 ---> c-Jun, Elk-1       | 252 Rac1 ---> c-Jun, Elk-1      | -2,52671405 |
| 272 G2/M phase (cyclin A:Cdk1    | 270 G2/M phase (cyclin A:Cdl    | 2,374479415 |
| 255 Csk, CD45 ---> Lck           | 262 Csk, CD45 ---> Lck          | -2,31662581 |
| 268 Csk, CD45 ---> Fyn           | 280 Csk, CD45 ---> Fyn          | -7,23213128 |
| 46 Trx ---/ ASK1                 | 48 Trx ---/ ASK1                | -2,69609149 |

|                                  |                                 |             |
|----------------------------------|---------------------------------|-------------|
| 239 IL-4 - STAT6 pathway         | 236 IL-4 - STAT6 pathway        | 2,13850274  |
| 240 IL-4 ---> STAT6              | 237 IL-4 ---> STAT6             | 2,13850274  |
| 131 MKK6 ---> Hsp27              | 138 MKK6 ---> Hsp27             | -1,4877481  |
| 265 Caspase-3 ---/ p53           | 265 Caspase-3 ---/ p53          | 1,163056244 |
| 266 IL-8 ---> ERK2               | 266 IL-8 ---> ERK2              | 1,163056244 |
| 267 Eps15 ---> ErbB internalizat | 267 Eps15 ---> ErbB internaliz  | 1,163056244 |
| 161 MEK-1 ---> HIF-1alpha        | 165 MEK-1 ---> HIF-1alpha       | -1,24880998 |
| 162 MKK6 ---/ MRF4               | 166 MKK6 ---/ MRF4              | -1,24880998 |
| 163 p38alpha ---> CREB           | 167 p38alpha ---> CREB          | -1,24880998 |
| 164 E1 ---/ alpha-tubulin        | 168 E1 ---/ alpha-tubulin       | -1,24880998 |
| 165 MKK6 ---> p53                | 169 MKK6 ---> p53               | -1,24880998 |
| 166 MKK4 ---/ RXR-alpha          | 170 MKK4 ---/ RXR-alpha         | -1,24880998 |
| 167 MKK4 ---p38alpha---> ATF     | 171 MKK4 ---p38alpha---> A      | -1,24880998 |
| 168 E1 ---/ synaptotagmin-11     | 172 E1 ---/ synaptotagmin-11    | -1,24880998 |
| 169 E1 ---/ beta-tubulin         | 173 E1 ---/ beta-tubulin        | -1,24880998 |
| 170 E1 ---/ Septin5              | 174 E1 ---/ Septin5             | -1,24880998 |
| 171 E1 ---dorfin---/ synphilin-1 | 175 E1 ---dorfin---/ synphilin- | -1,24880998 |
| 172 MEKK4 ---> JNK1              | 176 MEKK4 ---> JNK1             | -1,24880998 |
| 173 E1 ---parkin---/ synphilin-1 | 177 E1 ---parkin---/ synphilin- | -1,24880998 |
| 184 inhibitory phosphorylation c | 194 inhibitory phosphorylation  | -1,07801894 |
| 185 MKK7 ---> c-Jun              | 195 MKK7 ---> c-Jun             | -1,07801894 |
| 186 Fas ---> Caspase-8           | 197 Fas ---> Caspase-8          | -1,07801894 |
| 187 PP2Calpha ---/ MKK4          | 198 PP2Calpha ---/ MKK4         | -1,07801894 |
| 188 PP2Calpha ---/ MKK6          | 199 PP2Calpha ---/ MKK6         | -1,07801894 |
| 189 Caspase-6 ---> Caspase-3     | 108 Caspase-6 ---> Caspase-3    | 107,2906629 |
| 190 MEKK4 --MKK6---> ATF-        | 200 MEKK4 --MKK6---> AT         | -1,07801894 |
| 273 IL-2 ---> STAT5              | 272 IL-2 ---> STAT5             | 0,837551705 |
| 274 IL-2 - STAT5 pathway         | 273 IL-2 - STAT5 pathway        | 0,837551705 |
| 275 OSM ---> STAT1               | 274 OSM ---> STAT1              | 0,837551705 |
| 276 c-Kit pathway                | 275 c-Kit pathway               | 0,837551705 |
| 205 Rac1 ---/ cofilin            | 213 Rac1 ---/ cofilin           | -0,9487144  |
| 206 Fas ---> Abl                 | 214 Fas ---> Abl                | -0,9487144  |
| 207 E1 ---/ alpha-synuclein      | 215 E1 ---/ alpha-synuclein     | -0,9487144  |
| 208 PKCdelta ---> GRK2           | 216 PKCdelta ---> GRK2          | -0,9487144  |
| 209 VEGF-A ---> STAT1alpha       | 217 VEGF-A ---> STAT1alph       | -0,9487144  |
| 210 EGF ---> N-WASP              | 218 EGF ---> N-WASP             | -0,9487144  |
| 211 LMW-PTP ---/ VEGFR-1         | 219 LMW-PTP ---/ VEGFR-1        | -0,9487144  |
| 212 Fas ---/ SRF                 | 220 Fas ---/ SRF                | -0,9487144  |
| 213 Fas ---/ NuMA                | 221 Fas ---/ NuMA               | -0,9487144  |
| 215 Rac1 ---> p38                | 222 Rac1 ---> p38               | -0,9487144  |
| 234 Fas ---/ PRK2                | 243 Fas ---/ PRK2               | -1,18930953 |
| 235 E1 ---/ cyclin E             | 244 E1 ---/ cyclin E            | -1,18930953 |
| 236 Rac1 ---> golgin-160         | 245 Rac1 ---> golgin-160        | -1,18930953 |
| 237 MKK4 ---/ PPAR-gamma         | 246 MKK4 ---/ PPAR-gamma        | -1,18930953 |
| 238 PDGF B ---> cortactin        | 247 PDGF B ---> cortactin       | -1,18930953 |

|                            |                            |             |
|----------------------------|----------------------------|-------------|
| 269 Rac1 ---MLK3---> c-Jun | 281 Rac1 ---MLK3---> c-Jun | -3,795199   |
| 270 HB-EGF ---> PI3K       | 282 HB-EGF ---> PI3K       | -3,795199   |
| 271 c-Jun degradation      | 283 c-Jun degradation      | -3,795199   |
| 256 POSH ---> JNK1, JNK2   | 263 POSH ---> JNK1, JNK2   | -0,77884078 |
| 257 Fas ---> Caspase-2     | 185 Fas ---> Caspase-2     | 63,64755366 |
| 258 Ubc9 ---/ p73alpha     | 264 Ubc9 ---/ p73alpha     | -0,77884078 |
|                            |                            | 39486,65487 |

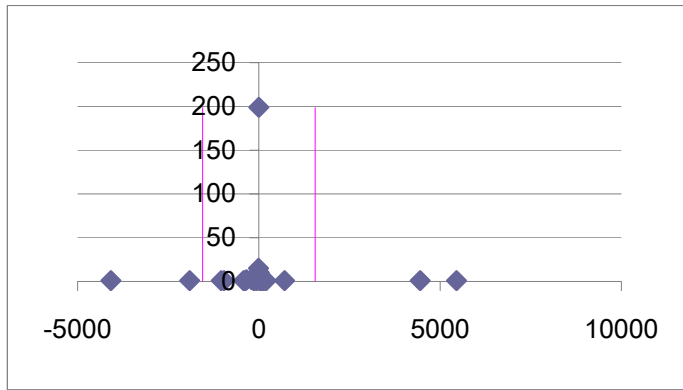

**High vs.control 4 table 10**

| Control Rank | Pathway name                 | Sample Rank | Pathway name                  | Delta Score |
|--------------|------------------------------|-------------|-------------------------------|-------------|
|              | 1 stress-associated pathways |             | 1 stress-associated pathways  | 105191796   |
| 8            | EGF pathway                  | 4           | EGF pathway                   | 462995,894  |
| 2            | p38 pathway                  | 3           | p38 pathway                   | -391151,66  |
| 4            | Epo pathway                  | 8           | Epo pathway                   | -163093,35  |
| 3            | RANKL pathway                | 5           | RANKL pathway                 | -157251,58  |
| 10           | PRL pathway                  | 13          | PRL pathway                   | -102743,87  |
| 9            | Fas pathway                  | 6           | Fas pathway                   | 271210,808  |
| 14           | JNK pathway                  | 2           | JNK pathway                   | 2089743,3   |
| 26           | Caspase network              | 28          | Caspase network               | -15419,937  |
| 5            | BMP2 ---> p38alpha           | 7           | BMP2 ---> p38alpha            | -15411,369  |
| 15           | Apo2L pathway                | 22          | Apo2L pathway                 | -16905,354  |
| 29           | TGFbeta pathway              | 47          | TGFbeta pathway               | -12776,428  |
| 7            | TAK1 ---> ATF-2              | 11          | TAK1 ---> ATF-2               | -7083,3837  |
| 11           | RANKL ---> MITF              | 12          | RANKL ---> MITF               | -4815,5778  |
| 72           | B-cell antigen receptor pat  | 102         | B-cell antigen receptor pathv | -5722,1819  |
| 119          | T-cell antigen receptor pat  | 99          | T-cell antigen receptor pathw | 5918,69113  |
| 13           | Epo ---> ERK1                | 16          | Epo ---> ERK1                 | -3500,3722  |
| 104          | insulin pathway              | 106         | insulin pathway               | 115,535717  |
| 70           | PDGF pathway                 | 50          | PDGF pathway                  | 2073,71427  |
| 6            | EGF ---> PAK1                | 9           | EGF ---> PAK1                 | -2298,629   |
| 23           | IL-8 pathway                 | 17          | IL-8 pathway                  | 4137,65282  |
| 39           | alpha Iib beta3 pathway      | 45          | alpha Iib beta3 pathway       | -2409,425   |
| 40           | alpha Iib beta3 ---> Rac1    | 46          | alpha Iib beta3 ---> Rac1     | -2409,425   |
| 20           | EGF ---> ERK                 | 23          | EGF ---> ERK                  | -1996,0433  |
| 97           | IL-1 pathway                 | 122         | IL-1 pathway                  | -1812,4436  |
| 16           | ZAP-70 ---> c-Jun            | 19          | ZAP-70 ---> c-Jun             | -1570,7673  |
| 28           | IL-1beta ---> c-Jun          | 33          | IL-1beta ---> c-Jun           | -1275,4003  |
| 105          | TLR3 pathway                 | 132         | TLR3 pathway                  | -1249,9803  |
| 183          | E2F network                  | 155         | E2F network                   | 1519,86108  |
| 41           | IL-1beta ---> Elk-1          | 51          | IL-1beta ---> Elk-1           | -1132,9195  |
| 19           | wnt pathway                  | 15          | wnt pathway                   | 1677,34992  |
| 62           | neurotensin pathway          | 18          | neurotensin pathway           | 6788,07184  |
| 17           | EGF ---> PI3K-C2beta         | 20          | EGF ---> PI3K-C2beta          | -905,76402  |
| 18           | RANKL ---> JNK1              | 21          | RANKL ---> JNK1               | -905,76402  |
| 27           | Epo ---> IP3, PtsIns(3,4)P   | 29          | Epo ---> IP3, PtsIns(3,4)P    | -906,48501  |
| 12           | c-Cbl ---/ ErBB1             | 14          | c-Cbl ---/ ErBB1              | -757,76979  |
| 184          | TLR4 pathway                 | 216         | TLR4 pathway                  | -630,42845  |
| 21           | FasL ---> Caspase-3          | 26          | FasL ---> Caspase-3           | -661,43087  |
| 22           | EGF ---> c-Fos               | 27          | EGF ---> c-Fos                | -661,43087  |
| 63           | RhoA ---> stress fiber forr  | 85          | RhoA ---> stress fiber forma  | -556,53785  |
| 64           | RhoA pathway                 | 86          | RhoA pathway                  | -556,53785  |
| 221          | p53 pathway                  | 205         | p53 pathway                   | 78,177674   |
| 68           | fMLP pathway                 | 43          | fMLP pathway                  | 833,066943  |
| 148          | IL-1beta ---> p50:RelA       | 180         | IL-1beta ---> p50:RelA        | -511,03277  |
| 81           | LPS ---> p38                 | 101         | LPS ---> p38                  | -483,00318  |
| 44           | parkin associated pathway    | 30          | parkin associated pathways    | 709,920599  |

|                                 |                                  |            |
|---------------------------------|----------------------------------|------------|
| 115 Rac1 pathway                | 130 Rac1 pathway                 | -456,61182 |
| 94 BCR ---> c-Jun               | 107 BCR ---> c-Jun               | -428,96479 |
| 172 EDAR pathway                | 133 EDAR pathway                 | 550,284665 |
| 30 JNK1 ---> MKK4               | 10 JNK1 ---> MKK4                | 16283,4563 |
| 31 JIP-1 ---> APP               | 34 JIP-1 ---> APP                | -255,35913 |
| 69 LAT ---> cofilin             | 76 LAT ---> cofilin              | -261,15483 |
| 103 BCR ---> p38                | 123 BCR ---> p38                 | -236,62337 |
| 185 IFN pathway                 | 177 IFN pathway                  | 382,714258 |
| 186 LPS ---> NF-kappaB          | 200 LPS ---> NF-kappaB           | -194,1888  |
| 82 IFNgamma ---> STAT1alpha     | 42 IFNgamma ---> STAT1alpha      | 1214,99309 |
| 42 Apo2L ---Caspase-8---> C     | 48 Apo2L ---Caspase-8---> Cas    | -194,70378 |
| 43 PRL ---IRS---> PI3K          | 49 PRL ---IRS---> PI3K           | -194,70378 |
| 173 G2/M phase (cyclin B:Cdk1)  | 184 G2/M phase (cyclin B:Cdk1)   | -184,28236 |
| 222 tuberin pathway             | 244 tuberin pathway              | -151,34719 |
| 130 BCR ---MLK3---> c-Jun       | 152 BCR ---MLK3---> c-Jun        | -179,97632 |
| 131 BCR ---> cytoskeletal reorg | 153 BCR ---> cytoskeletal reorga | -179,97632 |
| 132 insulin ---> glucose uptake | 154 insulin ---> glucose uptake  | -179,97632 |
| 24 EGF ---> STAT1alpha          | 24 EGF ---> STAT1alpha           | -168,57389 |
| 25 ASK1 ---> p38alpha           | 25 ASK1 ---> p38alpha            | -168,57389 |
| 99 PRL ---PI3K---> AKT          | 109 PRL ---PI3K---> AKT          | -173,79699 |
| 146 Htt pathway                 | 156 Htt pathway                  | -158,77313 |
| 100 Aurora-A cell cycle regula  | 73 Aurora-A cell cycle regulatic | 218,289234 |
| 101 PPAR pathway                | 74 PPAR pathway                  | 218,289234 |
| 102 Aurora-A activation, subst  | 75 Aurora-A activation, substrat | 218,289234 |
| 126 HIF-1alpha pathway          | 173 HIF-1alpha pathway           | -124,37914 |
| 195 TNF-alpha pathway           | 127 TNF-alpha pathway            | 1230,37046 |
| 65 TNF-alpha ---> c-Jun         | 70 TNF-alpha ---> c-Jun          | -153,17025 |
| 66 Caspase-9 ---> Caspases      | 71 Caspase-9 ---> Caspases       | -153,17025 |
| 67 PRL ---> PAK1                | 72 PRL ---> PAK1                 | -153,17025 |
| 241 VEGF-A pathway              | 234 VEGF-A pathway               | 279,255296 |
| 187 G1 phase (Cdk2)             | 181 G1 phase (Cdk2)              | 147,923962 |
| 71 G-alpha-q ---> arachidonic a | 110 G-alpha-q ---> arachidonic a | -170,29343 |
| 120 RANKL ---> AKT              | 134 RANKL ---> AKT               | -127,39826 |
| 121 dsRNA ---> IKK-alpha:IKK-   | 135 dsRNA ---> IKK-alpha:IKK-    | -127,39826 |
| 80 EDA-A2 ---> c-Jun            | 31 EDA-A2 ---> c-Jun             | 1037,58962 |
| 236 insulin ---> AKT-1 pathwa   | 253 insulin ---> AKT-1 pathway   | -22,421136 |
| 32 EGF ---> SHIP1               | 35 EGF ---> SHIP1                | -117,61962 |
| 33 Cis ---/ PRLR                | 36 Cis ---/ PRLR                 | -117,61962 |
| 34 EGF ---> STAT3               | 37 EGF ---> STAT3                | -117,61962 |
| 35 SOCS-1 ---/ PRL              | 38 SOCS-1 ---/ PRL               | -117,61962 |
| 36 Htt ---/ Caspase-8           | 39 Htt ---/ Caspase-8            | -117,61962 |
| 37 SOCS-3 ---/ EpoR             | 40 SOCS-3 ---/ EpoR              | -117,61962 |

|                                   |                                   |            |
|-----------------------------------|-----------------------------------|------------|
| 38 SOCS-3 ---/ PRLR               | 41 SOCS-3 ---/ PRLR               | -117,61962 |
| 118 cyclosome regulatory netw     | 100 cyclosome regulatory networ   | 146,559659 |
| 238 S phase (Cdk2)                | 218 S phase (Cdk2)                | 90,8759317 |
| 153 LAT ---> p50:RelA             | 178 LAT ---> p50:RelA             | -103,19565 |
| 154 LPS ---> JNK                  | 179 LPS ---> JNK                  | -103,19565 |
| 98 PRL ---> Raf-1                 | 108 PRL ---> Raf-1                | -107,14357 |
| 123 p73 pathway                   | 105 p73 pathway                   | 119,870269 |
| 45 Smac ---/ cIAP-2               | 52 Smac ---/ cIAP-2               | -86,976546 |
| 46 SHP-2 ---> PRL                 | 53 SHP-2 ---> PRL                 | -86,976546 |
| 47 Smac ---/ cIAP-1               | 54 Smac ---/ cIAP-1               | -86,976546 |
| 48 DLK ---> c-Jun                 | 55 DLK ---> c-Jun                 | -86,976546 |
| 49 beta-arrestin2 ---> c-Jun      | 56 beta-arrestin2 ---> c-Jun      | -86,976546 |
| 50 ASK1 ---DUSP19---> c-Jun       | 58 ASK1 ---DUSP19---> c-Jun       | -86,976546 |
| 51 PRL ---Gab-2---> PI3K          | 59 PRL ---Gab-2---> PI3K          | -86,976546 |
| 52 PDGF B ---> PAK-1              | 60 PDGF B ---> PAK-1              | -86,976546 |
| 116 dsRNA ---> c-Jun              | 129 dsRNA ---> c-Jun              | -85,796732 |
| 143 fMLP ---> superoxide          | 111 fMLP ---> superoxide          | 97,8976699 |
| 124 LAT ---> MLC                  | 137 LAT ---> MLC                  | -73,234051 |
| 125 MHC class I ---> LAT          | 138 MHC class I ---> LAT          | -73,234051 |
| 207 IFNalpha, IFNbeta, IFNgam     | 182 IFNalpha, IFNbeta, IFNgam     | 238,434187 |
| 147 cyclosome regulation          | 128 cyclosome regulation          | 79,8180154 |
| 73 MKK3 ---> HNF-1alpha           | 77 MKK3 ---> HNF-1alpha           | -67,349652 |
| 74 Epo ---> SHP-1                 | 78 Epo ---> SHP-1                 | -67,349652 |
| 75 GH pathway                     | 79 GH pathway                     | -67,349652 |
| 76 PDGF A ---> Crk                | 80 PDGF A ---> Crk                | -67,349652 |
| 77 Apo2L ---> Caspase-10          | 81 Apo2L ---> Caspase-10          | -67,349652 |
| 78 GH ---> Grb-2                  | 82 GH ---> Grb-2                  | -67,349652 |
| 79 Nod1 ---> Caspase-9            | 83 Nod1 ---> Caspase-9            | -67,349652 |
| 249 MHC class II ---> NF-AT       | 217 MHC class II ---> NF-AT       | 161,677336 |
| 95 insulin ---Jak1---> IRS-1, IR  | 103 insulin ---Jak1---> IRS-1, IR | -53,994028 |
| 96 Src ---> Rap2B                 | 104 Src ---> Rap2B                | -53,994028 |
| 240 BCR ---> NF-AT                | 230 BCR ---> NF-AT                | 38,6252246 |
| 194 PRL ---Src,FAK1---> ERK       | 204 PRL ---Src,FAK1---> ERK       | -39,436265 |
| 117 Epo ---> PIP3                 | 125 Epo ---> PIP3                 | -44,489307 |
| 223 insulin ---Shc---> MAPK cas   | 196 insulin ---Shc---> MAPK cas   | 36,8667001 |
| 127 Apaf-1 ---> Caspase-7         | 148 Apaf-1 ---> Caspase-7         | -39,798378 |
| 128 Apaf-1 ---> Caspase-3         | 149 Apaf-1 ---> Caspase-3         | -39,798378 |
| 129 CD19 ---> PLCgamma2           | 150 CD19 ---> PLCgamma2           | -39,798378 |
| 235 OSM pathway                   | 199 OSM pathway                   | 30,2319796 |
| 263 Plk1 activation and substrate | 251 Plk1 activation and substrate | 21,8095729 |
| 264 Plk1 cell cycle regulation    | 252 Plk1 cell cycle regulation    | 21,8095729 |
| 149 activin A ---> Smad2          | 157 activin A ---> Smad2          | -32,277972 |
| 150 activin A ---> Smad3          | 158 activin A ---> Smad3          | -32,277972 |
| 151 PRL ---Fyn---> PI3K           | 159 PRL ---Fyn---> PI3K           | -32,277972 |
| 152 LAT ---> PKCtheta             | 32 LAT ---> PKCtheta              | 1488,73646 |
| 145 VEGF-A ---> PLA2              | 193 VEGF-A ---> PLA2              | -29,228504 |
| 53 ErbB1 ---> endophilin 1        | 61 ErbB1 ---> endophilin 1        | -32,237889 |
| 54 TAO1 ---> p38alpha             | 62 TAO1 ---> p38alpha             | -32,237889 |

|                                 |                                 |            |
|---------------------------------|---------------------------------|------------|
| 55 MLK2 ---> JNK1               | 63 MLK2 ---> JNK1               | -32,237889 |
| 56 TAO2 ---MKK6---> p38al       | 64 TAO2 ---MKK6---> p38alph     | -32,237889 |
| 57 E1 ---/ ErbB3                | 65 E1 ---/ ErbB3                | -32,237889 |
| 58 MLK2 ---MKK3---> p38a        | 66 MLK2 ---MKK3---> p38alpl     | -32,237889 |
| 59 MLK2 ---MKK6---> p38a        | 67 MLK2 ---MKK6---> p38alpl     | -32,237889 |
| 60 TAK1 ---> p38alpha           | 68 TAK1 ---> p38alpha           | -32,237889 |
| 61 TAO2 ---MKK3---> p38al       | 69 TAO2 ---MKK3---> p38alph     | -32,237889 |
| 193 OSM ---> ERK                | 183 OSM ---> ERK                | 27,7370587 |
| 174 IFNalpha, IFNbeta ---> PI   | 194 IFNalpha, IFNbeta ---> PI3K | -24,805287 |
| 192 LAT ---> Ras                | 136 LAT ---> Ras                | 193,366101 |
| 254 dsRNA ---> p50:RelA         | 248 dsRNA ---> p50:RelA         | 16,2372802 |
| 83 MEKK3 ---> ATF-2             | 87 MEKK3 ---> ATF-2             | -24,313416 |
| 84 MEKK2 ---MKK7---> JNK1       | 88 MEKK2 ---MKK7---> JNK1       | -24,313416 |
| 85 MEKK2 ---> ATF-2             | 89 MEKK2 ---> ATF-2             | -24,313416 |
| 86 GCK ---> MKK4                | 90 GCK ---> MKK4                | -24,313416 |
| 87 PDGF A ---> SHP-2            | 91 PDGF A ---> SHP-2            | -24,313416 |
| 88 MKK4 ---> c-Jun              | 92 MKK4 ---> c-Jun              | -24,313416 |
| 89 PDGF B ---> PKR              | 93 PDGF B ---> PKR              | -24,313416 |
| 90 TAK1 ---> c-Jun              | 94 TAK1 ---> c-Jun              | -24,313416 |
| 91 p38alpha ---> STAT3          | 95 p38alpha ---> STAT3          | -24,313416 |
| 92 Epo ---Lyn---> STAT5A        | 97 Epo ---Lyn---> STAT5A        | -24,313416 |
| 93 MEKK2 ---> ATF-2             | 98 MEKK2 ---> ATF-2             | -24,313416 |
| 220 insulin ---IRS---> PRK2, SH | 232 insulin ---IRS---> PRK2, SH | -21,659479 |
| 237 mTOR ----> S6, eIF-4E       | 249 mTOR ----> S6, eIF-4E       | -16,565762 |
| 245 ZAP-70 ---> Elk-1           | 260 ZAP-70 ---> Elk-1           | -15,160344 |
| 246 PDGF A ---> ERK             | 261 PDGF A ---> ERK             | -15,160344 |
| 247 AKT, MAPKAPK2 ---/ tube     | 262 AKT, MAPKAPK2 ---/ tube     | -15,160344 |
| 248 PDGF B ---> ERK             | 263 PDGF B ---> ERK             | -15,160344 |
| 106 MKP-5 ---/ p53; MKK4 --     | 112 MKP-5 ---/ p53; MKK4 --->   | -19,37068  |
| 107 VEGF-A ---> Ras             | 113 VEGF-A ---> Ras             | -19,37068  |
| 108 PRL ----> Jak2              | 115 PRL ---> Jak2               | -19,37068  |
| 109 PDGF B ---> Src             | 116 PDGF B ---> Src             | -19,37068  |
| 110 PDGF A ---> Src             | 117 PDGF A ---> Src             | -19,37068  |
| 111 SHP-1 ---/ ErbB1            | 118 SHP-1 ---/ ErbB1            | -19,37068  |
| 112 CD148 ---/ PDGFRbeta        | 119 CD148 ---/ PDGFRbeta        | -19,37068  |
| 113 PRL ---Jak2---> STAT5A      | 120 PRL ---Jak2---> STAT5A      | -19,37068  |
| 114 Unc18-1 ---/ PLD2           | 121 Unc18-1 ---/ PLD2           | -19,37068  |
| 267 BCR ---> ERK                | 264 BCR ---> ERK                | 10,3950385 |
| 268 TNF-alpha ---> NFkappaE     | 233 TNF-alpha ---> NFkappaB     | 107,963262 |
| 133 MLK2 ---> NeuroD            | 139 MLK2 ---> NeuroD            | -16,009848 |
| 134 PRL ---Src---> STAT5B       | 140 PRL ---Src---> STAT5B       | -16,009848 |
| 135 Smac ---> Caspase-3         | 141 Smac ---> Caspase-3         | -16,009848 |
| 136 PTEN ---/ AKT-1             | 142 PTEN ---/ AKT-1             | -16,009848 |
| 137 Smurf-1 ---/ Smad7, TGFbeta | 143 Smurf-1 ---/ Smad7, TGFbeta | -16,009848 |



|                                |                                  |            |
|--------------------------------|----------------------------------|------------|
| 138 Epo ---> STAT5             | 144 Epo ---> STAT5               | -16,009848 |
| 139 Htt ---> Ca                | 145 Htt ---> Ca                  | -16,009848 |
| 140 EDAR ---> TRAF2            | 146 EDAR ---> TRAF2              | -16,009848 |
| 141 ASK1 ---MKK4---> JNK1      | 57 ASK1 ---MKK4---> JNK1         | 296,396587 |
| 142 Fas ---/ Cdc42             | 147 Fas ---/ Cdc42               | -16,009848 |
| 155 PDGF B ---> STATs          | 174 PDGF B ---> STATs            | -13,603628 |
| 156 JNK1 ---> Bax              | 175 JNK1 ---> Bax                | -13,603628 |
| 157 Htt ---> NeuroD            | 176 Htt ---> NeuroD              | -13,603628 |
| 158 JLP ---> JNK1              | 84 JLP ---> JNK1                 | 230,320418 |
| 253 beta-catenin network       | 247 beta-catenin network         | 8,62837947 |
| 188 PDGF B ---SHP-2---> Ras    | 124 PDGF B ---SHP-2---> Ras; F   | 155,168227 |
| 189 BMP7 ---> Smad1, Smad5     | 197 BMP7 ---> Smad1, Smad5, S    | -10,501545 |
| 190 SLP-65 ---/ Raf-1          | 198 SLP-65 ---/ Raf-1            | -10,501545 |
| 191 PDGF B---/ Ras             | 126 PDGF B---/ Ras               | 155,168227 |
| 260 VEGF-A ---/ Caspase-9, B   | 254 VEGF-A ---/ Caspase-9, Bad   | 6,66609096 |
| 261 IL-12 - STAT4 pathway      | 255 IL-12 - STAT4 pathway        | 6,66609096 |
| 262 IL-12 ---> STAT4           | 256 IL-12 ---> STAT4             | 6,66609096 |
| 208 IL-22 ---> STAT1alpha, S   | 219 IL-22 ---> STAT1alpha, STA   | -9,3989128 |
| 209 Fer ---> beta-cateninp{Tyr | 220 Fer ---> beta-cateninp{Tyr14 | -9,3989128 |
| 210 PDGF A ---> AKT-1          | 221 PDGF A ---> AKT-1            | -9,3989128 |
| 211 IL-22 pathway              | 222 IL-22 pathway                | -9,3989128 |
| 212 IFNalpha, IFNbeta ---> ST  | 223 IFNalpha, IFNbeta ---> STA   | -9,3989128 |
| 213 IL-10 pathway              | 224 IL-10 pathway                | -9,3989128 |
| 214 PDK1 ---> 4E-BP1, p70S6    | 225 PDK1 ---> 4E-BP1, p70S6K     | -9,3989128 |
| 215 PDGF B ---> AKT-1          | 226 PDGF B ---> AKT-1            | -9,3989128 |
| 216 EGF ---> PLD2              | 227 EGF ---> PLD2                | -9,3989128 |
| 217 IL-10 ---> STAT1alpha, S   | 228 IL-10 ---> STAT1alpha, STA   | -9,3989128 |
| 218 CHIP ---/ Pael-R           | 229 CHIP ---/ Pael-R             | -9,3989128 |
| 219 Src ---/ RhoA              | 151 Src ---/ RhoA                | 130,079563 |
| 227 TGFbeta ---> Smad2, Sma    | 240 TGFbeta ---> Smad2, Smad3    | -8,4908958 |
| 228 Src ---> Rac1              | 242 Src ---> Rac1                | -8,4908958 |
| 229 Rac1 ---> c-Jun, Elk-1     | 243 Rac1 ---> c-Jun, Elk-1       | -8,4908958 |
| 239 Csk, CD45 ---> Lck         | 250 Csk, CD45 ---> Lck           | -7,7218166 |
| 252 Csk, CD45 ---> Fyn         | 265 Csk, CD45 ---> Fyn           | -7,2025036 |
| 259 G2/M phase (cyclin A:Cdk1  | 273 G2/M phase (cyclin A:Cdk1)   | -7,2552699 |
| 265 IFNalpha, IFNbeta ---> ST  | 266 IFNalpha, IFNbeta ---> STA   | 5,08483749 |
| 266 VEGF-A ---> NO             | 231 VEGF-A ---> NO               | 73,6059617 |
| 224 PDGF A ---> DAG, IP3       | 201 PDGF A ---> DAG, IP3         | 6,61356684 |
| 225 PDGF B --> DAG, IP3        | 202 PDGF B --> DAG, IP3          | 6,61356684 |
| 226 PI3K ---/ p53              | 203 PI3K ---/ p53                | 6,61356684 |
| 250 IL-4 - STAT6 pathway       | 245 IL-4 - STAT6 pathway         | 3,65170097 |
| 251 IL-4 ---> STAT6            | 246 IL-4 ---> STAT6              | 3,65170097 |
| 122 MKK6 ---> Hsp27            | 131 MKK6 ---> Hsp27              | -4,7672217 |
| 258 EGF ---> DAG, IP3          | 241 EGF ---> DAG, IP3            | 36,5142819 |

|                                  |                                   |            |
|----------------------------------|-----------------------------------|------------|
| 159 MEK-1 ---> HIF-1alpha        | 160 MEK-1 ---> HIF-1alpha         | -4,4370308 |
| 160 MKK6 ---/ MRF4               | 161 MKK6 ---/ MRF4                | -4,4370308 |
| 161 p38alpha ---> CREB           | 162 p38alpha ---> CREB            | -4,4370308 |
| 162 E1 ---/ alpha-tubulin        | 163 E1 ---/ alpha-tubulin         | -4,4370308 |
| 163 MKK6 ---> p53                | 164 MKK6 ---> p53                 | -4,4370308 |
| 164 MKK4 ---/ RXR-alpha          | 165 MKK4 ---/ RXR-alpha           | -4,4370308 |
| 165 MKK4 ---p38alpha---> A1      | 166 MKK4 ---p38alpha---> ATF      | -4,4370308 |
| 166 E1 ---/ synaptotagmin-11     | 167 E1 ---/ synaptotagmin-11      | -4,4370308 |
| 167 E1 ---/ beta-tubulin         | 168 E1 ---/ beta-tubulin          | -4,4370308 |
| 168 E1 ---/ Septin5              | 169 E1 ---/ Septin5               | -4,4370308 |
| 169 E1 ---dorfin---/ synphilin-1 | 170 E1 ---dorfin---/ synphilin-1  | -4,4370308 |
| 170 MEKK4 ---> JNK1              | 171 MEKK4 ---> JNK1               | -4,4370308 |
| 171 E1 ---parkin---/ synphilin-  | 172 E1 ---parkin---/ synphilin-1  | -4,4370308 |
| 175 inhibitory phosphorylation   | 185 inhibitory phosphorylation of | -3,5285167 |
| 176 MKK7 ---> c-Jun              | 186 MKK7 ---> c-Jun               | -3,5285167 |
| 177 Fas ---> Caspase-8           | 188 Fas ---> Caspase-8            | -3,5285167 |
| 178 JNK2 ---> doublecortin       | 96 JNK2 ---> doublecortin         | 116,440801 |
| 179 PP2Calpha ---/ MKK4          | 189 PP2Calpha ---/ MKK4           | -3,5285167 |
| 180 PP2Calpha ---/ MKK6          | 190 PP2Calpha ---/ MKK6           | -3,5285167 |
| 181 Caspase-6 ---> Caspase-3     | 191 Caspase-6 ---> Caspase-3      | -3,5285167 |
| 182 MEKK4 --MKK6---> ATI         | 192 MEKK4 --MKK6---> ATF-2        | -3,5285167 |
| 269 IL-8 ---> ERK2               | 268 IL-8 ---> ERK2                | 1,87059059 |
| 270 Eps15 ---> ErbB internaliz   | 269 Eps15 ---> ErbB internalizati | 1,87059059 |
| 196 Rac1 ---/ cofilin            | 206 Rac1 ---/ cofilin             | -3,156909  |
| 197 Fas ---> Abl                 | 207 Fas ---> Abl                  | -3,156909  |
| 198 E1 ---/ alpha-synuclein      | 208 E1 ---/ alpha-synuclein       | -3,156909  |
| 199 PKCdelta ---> GRK2           | 114 PKCdelta ---> GRK2            | 92,294115  |
| 200 VEGF-A ---> STAT1alph:       | 209 VEGF-A ---> STAT1alpha        | -3,156909  |
| 201 EGF ---> N-WASP              | 210 EGF ---> N-WASP               | -3,156909  |
| 202 LMW-PTP ---/ VEGFR-1         | 211 LMW-PTP ---/ VEGFR-1          | -3,156909  |
| 203 Fas ---/ SRF                 | 212 Fas ---/ SRF                  | -3,156909  |
| 204 Fas ---/ NuMA                | 213 Fas ---/ NuMA                 | -3,156909  |
| 205 xolloid ---> BMP4            | 214 xolloid ---> BMP4             | -3,156909  |
| 206 Rac1 ---> p38                | 215 Rac1 ---> p38                 | -3,156909  |
| 230 Fas ---/ PRK2                | 235 Fas ---/ PRK2                 | -2,8648569 |
| 231 E1 ---/ cyclin E             | 236 E1 ---/ cyclin E              | -2,8648569 |
| 232 Rac1 ---> golgin-160         | 237 Rac1 ---> golgin-160          | -2,8648569 |
| 233 MKK4 ---/ PPAR-gamma         | 238 MKK4 ---/ PPAR-gamma          | -2,8648569 |
| 234 PDGF B ---> cortactin        | 239 PDGF B ---> cortactin         | -2,8648569 |
| 255 Rac1 ---MLK3---> c-Jun       | 270 Rac1 ---MLK3---> c-Jun        | -2,484075  |
| 256 HB-EGF ---> PI3K             | 271 HB-EGF ---> PI3K              | -2,484075  |
| 257 c-Jun degradation            | 272 c-Jun degradation             | -2,484075  |
| 242 Fas ---> Caspase-2           | 258 Fas ---> Caspase-2            | -2,6760645 |
| 243 Ubc9 ---/ p73alpha           | 259 Ubc9 ---/ p73alpha            | -2,6760645 |
| 271 IL-2 ---> STAT5              | 274 IL-2 ---> STAT5               | 1,28127444 |

272 IL-2 - STAT5 pathway  
273 OSM ---> STAT1  
274 c-Kit pathway

275 IL-2 - STAT5 pathway  
276 OSM ---> STAT1  
277 c-Kit pathway

1,28127444  
1,28127444  
1,28127444

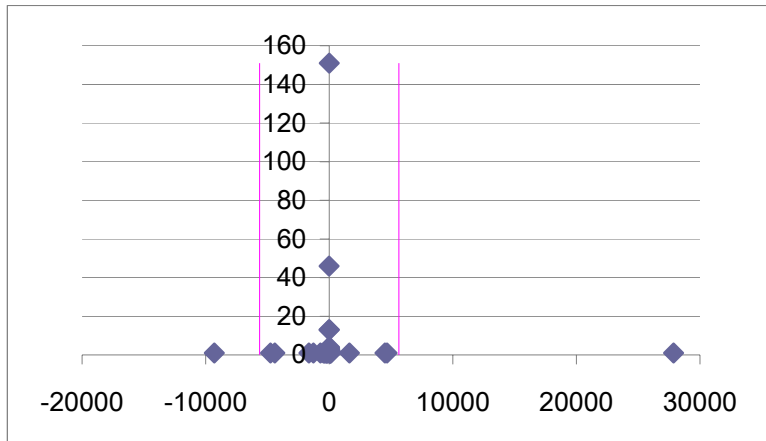

### High vs low 1 table 11

| Control Rank | Pathway name                        | Sample Rank | Pathway name                        | Delta Score |
|--------------|-------------------------------------|-------------|-------------------------------------|-------------|
|              | 1 stress-associated pathways        |             | 1 stress-associated pathways        | 45725058,3  |
|              | 4 JNK pathway                       |             | 2 JNK pathway                       | 561448,091  |
|              | 7 EGF pathway                       |             | 7 EGF pathway                       | 524319,933  |
|              | 3 Epo pathway                       |             | 9 Epo pathway                       | -105398,32  |
|              | 8 PRL pathway                       |             | 19 PRL pathway                      | -65534,718  |
|              | 6 RANKL pathway                     |             | 6 RANKL pathway                     | 50930,7926  |
|              | 2 IFNgamma ---> STAT1alpha          |             | 22 IFNgamma ---> STAT1alpha         | -79734,99   |
|              | 26 TLR3 pathway                     |             | 81 TLR3 pathway                     | -14481,579  |
|              | 18 IFN pathway                      |             | 140 IFN pathway                     | -20173,529  |
|              | 60 insulin pathway                  |             | 130 insulin pathway                 | -12421,94   |
|              | 13 IFNalpha, IFNbeta, IFNgamma ---> |             | 135 IFNalpha, IFNbeta, IFNgamma     | -15830,408  |
|              | 94 T-cell antigen receptor pathway  |             | 115 T-cell antigen receptor pathway | -23,432629  |
|              | 42 PDGF pathway                     |             | 80 PDGF pathway                     | -4225,4099  |
|              | 68 Fas pathway                      |             | 3 Fas pathway                       | 647984,666  |
|              | 11 Epo ---> ERK1                    |             | 20 Epo ---> ERK1                    | -1975,5089  |
|              | 9 BMP2 ---> p38alpha                |             | 5 BMP2 ---> p38alpha                | 18215,9789  |
|              | 87 TLR4 pathway                     |             | 34 TLR4 pathway                     | 19836,848   |
|              | 100 E2F network                     |             | 131 E2F network                     | 23,2697996  |
|              | 5 EGF ---> PAK1                     |             | 8 EGF ---> PAK1                     | -1106,1736  |
|              | 111 B-cell antigen receptor pathway |             | 120 B-cell antigen receptor pathway | 1040,2551   |
|              | 40 alpha Iib beta3 pathway          |             | 53 alpha Iib beta3 pathway          | -1406,7947  |
|              | 41 alpha Iib beta3 ---> Rac1        |             | 54 alpha Iib beta3 ---> Rac1        | -1406,7947  |
|              | 19 EGF ---> ERK                     |             | 27 EGF ---> ERK                     | -1084,3127  |
|              | 99 IL-1 pathway                     |             | 139 IL-1 pathway                    | -965,09918  |
|              | 208 Caspase network                 |             | 21 Caspase network                  | 140621,676  |
|              | 15 ZAP-70 ---> c-Jun                |             | 23 ZAP-70 ---> c-Jun                | -821,79742  |
|              | 43 IL-8 pathway                     |             | 17 IL-8 pathway                     | 12170,4674  |
|              | 74 p38 pathway                      |             | 4 p38 pathway                       | 267706,1    |
|              | 12 TAK1 ---> ATF-2                  |             | 12 TAK1 ---> ATF-2                  | 10378,1529  |
|              | 14 wnt pathway                      |             | 15 wnt pathway                      | 3364,60684  |
|              | 47 neurotensin pathway              |             | 10 neurotensin pathway              | 29087,6033  |
|              | 28 IL-1beta ---> c-Jun              |             | 38 IL-1beta ---> c-Jun              | -678,06087  |
|              | 20 RANKL ---> MITF                  |             | 16 RANKL ---> MITF                  | 5833,58975  |
|              | 21 dsRNA ---> c-Jun                 |             | 30 dsRNA ---> c-Jun                 | -600,24118  |
|              | 178 p53 pathway                     |             | 193 p53 pathway                     | -282,88153  |
|              | 16 EGF ---> PI3K-C2beta             |             | 24 EGF ---> PI3K-C2beta             | -436,4536   |
|              | 17 RANKL ---> JNK1                  |             | 25 RANKL ---> JNK1                  | -436,4536   |
|              | 27 Epo ---> IP3, PtsIns(3,4)P       |             | 35 Epo ---> IP3, PtsIns(3,4)P       | -448,35039  |
|              | 10 c-Cbl ---/ ErBB1                 |             | 18 c-Cbl ---/ ErBB1                 | -336,23052  |
|              | 48 RhoA ---> stress fiber formation |             | 78 RhoA ---> stress fiber formation | 29,0101013  |
|              | 49 RhoA pathway                     |             | 79 RhoA pathway                     | 29,0101013  |
|              | 57 fMLP pathway                     |             | 33 fMLP pathway                     | 1712,57019  |
|              | 22 EGF ---> c-Fos                   |             | 32 EGF ---> c-Fos                   | -307,31861  |
|              | 142 Apo2L pathway                   |             | 26 Apo2L pathway                    | 17865,187   |
|              | 151 IL-1beta ---> p50:RelA          |             | 190 IL-1beta ---> p50:RelA          | -220,78058  |
|              | 196 TGFbeta pathway                 |             | 110 TGFbeta pathway                 | 7515,50746  |

|                                        |                                      |            |
|----------------------------------------|--------------------------------------|------------|
| 89 BCR ---> c-Jun                      | 119 BCR ---> c-Jun                   | -190,40999 |
| 90 IL-1beta ---> Elk-1                 | 77 IL-1beta ---> Elk-1               | 1224,65915 |
| 124 G2/M phase (cyclin B:Cdk1)         | 202 G2/M phase (cyclin B:Cdk1)       | -703,32354 |
| 29 Aurora-A cell cycle regulation      | 55 Aurora-A cell cycle regulation    | -115,96718 |
| 30 Aurora-A activation, substrates and | 57 Aurora-A activation, substrates : | -115,96718 |
| 69 dsRNA ---> IKK-alpha:IKK-beta{f     | 39 dsRNA ---> IKK-alpha:IKK-bet      | 1557,34901 |
| 24 GH pathway                          | 89 GH pathway                        | -986,73164 |
| 25 GH ---> Grb-2                       | 92 GH ---> Grb-2                     | -986,73164 |
| 88 parkin associated pathways          | 76 parkin associated pathways        | 729,023145 |
| 202 VEGF-A pathway                     | 242 VEGF-A pathway                   | -42,754393 |
| 31 JIP-1 ---> APP                      | 40 JIP-1 ---> APP                    | -96,869381 |
| 45 cyclosome regulatory network        | 85 cyclosome regulatory network      | -62,721722 |
| 101 BCR ---> p38                       | 136 BCR ---> p38                     | -93,721959 |
| 180 LPS ---> NF-kappaB                 | 49 LPS ---> NF-kappaB                | 6644,40473 |
| 167 Rac1 pathway                       | 141 Rac1 pathway                     | 540,331277 |
| 120 dsRNA ---> p50:RelA                | 207 dsRNA ---> p50:RelA              | -439,66476 |
| 46 PRL ---IRS---> PI3K                 | 52 PRL ---IRS---> PI3K               | -68,73924  |
| 214 tuberin pathway                    | 258 tuberin pathway                  | -18,761434 |
| 215 insulin ---> AKT-1 pathway         | 241 insulin ---> AKT-1 pathway       | -58,451059 |
| 143 LPS ---> p38                       | 13 LPS ---> p38                      | 50676,3029 |
| 144 BCR ---MLK3---> c-Jun              | 162 BCR ---MLK3---> c-Jun            | -56,196779 |
| 145 insulin ---> glucose uptake        | 164 insulin ---> glucose uptake      | -56,196779 |
| 23 EGF ---> STAT1alpha                 | 28 EGF ---> STAT1alpha               | -52,756915 |
| 98 PRL ---PI3K---> AKT                 | 118 PRL ---PI3K---> AKT              | -57,894603 |
| 189 TNF-alpha pathway                  | 96 TNF-alpha pathway                 | 2589,20275 |
| 61 IL-22 ---> STAT1alpha, STAT3        | 224 IL-22 ---> STAT1alpha, STAT3     | -562,53018 |
| 62 IL-22 pathway                       | 227 IL-22 pathway                    | -562,53018 |
| 63 TNF-alpha ---> c-Jun                | 82 TNF-alpha ---> c-Jun              | -49,661556 |
| 64 IL-10 pathway                       | 229 IL-10 pathway                    | -562,53018 |
| 65 IL-10 ---> STAT1alpha, STAT3        | 233 IL-10 ---> STAT1alpha, STAT3     | -562,53018 |
| 66 PRL ---> PAK1                       | 84 PRL ---> PAK1                     | -49,661556 |
| 206 EDAR pathway                       | 152 EDAR pathway                     | 995,351723 |
| 67 cyclosome regulation                | 116 cyclosome regulation             | -17,035355 |
| 125 RANKL ---> AKT                     | 151 RANKL ---> AKT                   | -34,549688 |
| 229 G1 phase (Cdk2)                    | 161 G1 phase (Cdk2)                  | 490,941548 |
| 72 EDA-A2 ---> c-Jun                   | 36 EDA-A2 ---> c-Jun                 | 953,496669 |
| 73 LAT ---> PKCtheta                   | 37 LAT ---> PKCtheta                 | 953,496669 |
| 243 S phase (Cdk2)                     | 209 S phase (Cdk2)                   | 263,690202 |
| 32 EGF ---> SHIP1                      | 41 EGF ---> SHIP1                    | -32,79562  |
| 33 Cis ---/ PRLR                       | 42 Cis ---/ PRLR                     | -32,79562  |
| 34 VEGF-A ---> Ras                     | 122 VEGF-A ---> Ras                  | -409,79977 |
| 35 EGF ---> STAT3                      | 43 EGF ---> STAT3                    | -32,79562  |

|                                         |                                      |            |
|-----------------------------------------|--------------------------------------|------------|
| 36 PKCdelta ---> GRK2                   | 216 PKCdelta ---> GRK2               | -497,40072 |
| 37 SOCS-1 ---/ PRL                      | 44 SOCS-1 ---/ PRL                   | -32,79562  |
| 38 SOCS-3 ---/ EpoR                     | 46 SOCS-3 ---/ EpoR                  | -32,79562  |
| 39 SOCS-3 ---/ PRLR                     | 47 SOCS-3 ---/ PRLR                  | -32,79562  |
| 149 PPAR pathway                        | 56 PPAR pathway                      | 734,691807 |
| 152 LAT ---> p50:RelA                   | 188 LAT ---> p50:RelA                | -20,57155  |
| 153 LPS ---> JNK                        | 14 LPS ---> JNK                      | 39162,3445 |
| 95 PRL ---> Raf-1                       | 117 PRL ---> Raf-1                   | -31,54253  |
| 96 IL-4 - STAT6 pathway                 | 236 IL-4 - STAT6 pathway             | -405,49001 |
| 97 IL-4 ---> STAT6                      | 237 IL-4 ---> STAT6                  | -405,49001 |
| 122 G-alpha-q ---> arachidonic acid, EI | 111 G-alpha-q ---> arachidonic acid, | 225,383493 |
| 123 fMLP ---> superoxide                | 112 fMLP ---> superoxide             | 225,383493 |
| 218 HIF-1alpha pathway                  | 203 HIF-1alpha pathway               | 184,743173 |
| 50 SHP-2 ---> PRL                       | 59 SHP-2 ---> PRL                    | -21,721713 |
| 51 DLK ---> c-Jun                       | 61 DLK ---> c-Jun                    | -21,721713 |
| 52 beta-arrestin2 ---> c-Jun            | 62 beta-arrestin2 ---> c-Jun         | -21,721713 |
| 53 ASK1 ---MKK4---> JNK1                | 63 ASK1 ---MKK4---> JNK1             | -21,721713 |
| 54 ASK1 ---DUSP19---> c-Jun             | 64 ASK1 ---DUSP19---> c-Jun          | -21,721713 |
| 55 PRL ---Gab-2---> PI3K                | 65 PRL ---Gab-2---> PI3K             | -21,721713 |
| 56 PDGF B ---> PAK-1                    | 66 PDGF B ---> PAK-1                 | -21,721713 |
| 118 IFNalpha, IFNbeta ---> PI3K         | 208 IFNalpha, IFNbeta ---> PI3K      | -241,26753 |
| 179 BCR ---> cytoskeletal reorganizatic | 163 BCR ---> cytoskeletal reorganiz: | 314,665406 |
| 207 OSM pathway                         | 201 OSM pathway                      | -38,781878 |
| 70 Epo ---> SHP-1                       | 88 Epo ---> SHP-1                    | -14,240213 |
| 71 PDGF A ---> Crk                      | 90 PDGF A ---> Crk                   | -14,240213 |
| 146 AhR pathway                         | 50 AhR pathway                       | 440,242927 |
| 147 Plk1 activation and substrates      | 256 Plk1 activation and substrates   | 5,47321379 |
| 148 Plk1 cell cycle regulation          | 257 Plk1 cell cycle regulation       | 5,47321379 |
| 242 MHC class II ---> NF-AT             | 234 MHC class II ---> NF-AT          | 188,926349 |
| 230 BCR ---> NF-AT                      | 210 BCR ---> NF-AT                   | 110,455718 |
| 231 p73 pathway                         | 95 p73 pathway                       | 485,922398 |
| 170 mTOR ----> S6, eIF-4E               | 260 mTOR ----> S6, eIF-4E            | -138,81219 |
| 91 JNK1 ---> MKK4                       | 11 JNK1 ---> MKK4                    | 14161,8518 |
| 92 insulin ---Jak1---> IRS-1, IRS-2     | 113 insulin ---Jak1---> IRS-1, IRS-2 | -9,1331725 |
| 93 Src ---> Rap2B                       | 114 Src ---> Rap2B                   | -9,1331725 |
| 195 insulin ---Shc---> MAPK cascade     | 191 insulin ---Shc---> MAPK cascad   | 103,549441 |
| 169 Htt pathway                         | 186 Htt pathway                      | 399,901996 |
| 188 PRL ---Src,FAK1---> ERK             | 223 PRL ---Src,FAK1---> ERK          | 1,68608298 |
| 112 PDGF B ---SHP-2---> Ras; PDGF       | 132 PDGF B ---SHP-2---> Ras; PDC     | -5,4377873 |
| 113 Epo ---> PIP3                       | 133 Epo ---> PIP3                    | -5,4377873 |
| 114 IL-2 ---> STAT5                     | 272 IL-2 ---> STAT5                  | -203,61771 |
| 115 IL-2 - STAT5 pathway                | 273 IL-2 - STAT5 pathway             | -203,61771 |
| 116 PDGF B---/ Ras                      | 134 PDGF B---/ Ras                   | -5,4377873 |
| 117 OSM ---> STAT1                      | 274 OSM ---> STAT1                   | -203,61771 |
| 234 OSM ---> ERK                        | 181 OSM ---> ERK                     | 44,4534635 |
| 126 IFNalpha, IFNbeta ---> STAT5        | 228 IFNalpha, IFNbeta ---> STAT5     | -131,03591 |
| 127 Apaf-1 ---> Caspase-7               | 156 Apaf-1 ---> Caspase-7            | -5,0516759 |
| 128 PDK1 ---> 4E-BP1, p70S6K1           | 230 PDK1 ---> 4E-BP1, p70S6K1        | -131,03591 |

|                                       |                                    |            |
|---------------------------------------|------------------------------------|------------|
| 129 Apaf-1 ---> Caspase-3             | 157 Apaf-1 ---> Caspase-3          | -5,0516759 |
| 130 Caspase-9 ---> Caspases           | 83 Caspase-9 ---> Caspases         | 381,832717 |
| 131 CD19 ---> PLCgamma2               | 158 CD19 ---> PLCgamma2            | -5,0516759 |
| 132 Src ---/ RhoA                     | 160 Src ---/ RhoA                  | -5,0516759 |
| 150 PRL ---Fyn---> PI3K               | 180 PRL ---Fyn---> PI3K            | -0,9970638 |
| 58 ErbB1 ---> endophilin 1            | 67 ErbB1 ---> endophilin 1         | -2,7491326 |
| 59 MLK2 ---> JNK1                     | 69 MLK2 ---> JNK1                  | -2,7491326 |
| 177 dsRNA ---> IRF-7:IRF-3:CBP:p30    | 212 dsRNA ---> IRF-7:IRF-3:CBP:p   | -88,721794 |
| 183 LAT ---> Ras                      | 153 LAT ---> Ras                   | 194,984406 |
| 184 LAT ---> MLC                      | 154 LAT ---> MLC                   | 194,984406 |
| 185 G2/M phase (cyclin A:Cdk1)        | 270 G2/M phase (cyclin A:Cdk1)     | -71,324102 |
| 186 LAT ---> cofilin                  | 86 LAT ---> cofilin                | 703,753574 |
| 187 MHC class I ---> LAT              | 155 MHC class I ---> LAT           | 194,984406 |
| 203 IFNalpha, IFNbeta ---> STAT1alpha | 261 IFNalpha, IFNbeta ---> STAT1a  | -51,802438 |
| 204 VEGF-A ---> NO                    | 239 VEGF-A ---> NO                 | 2,90626503 |
| 205 insulin ---IRS---> PRK2, SHP-2, M | 240 insulin ---IRS---> PRK2, SHP-2 | 2,90626503 |
| 75 MEKK2 ---MKK7---> JNK1             | 98 MEKK2 ---MKK7---> JNK1          | -2,1965545 |
| 77 MEKK2 ---> ATF-2                   | 99 MEKK2 ---> ATF-2                | -2,1965545 |
| 78 GCK ---> MKK4                      | 100 GCK ---> MKK4                  | -2,1965545 |
| 79 PDGF A ---> SHP-2                  | 101 PDGF A ---> SHP-2              | -2,1965545 |
| 80 MKK4 ---> c-Jun                    | 102 MKK4 ---> c-Jun                | -2,1965545 |
| 81 PDGF B ---> PKR                    | 103 PDGF B ---> PKR                | -2,1965545 |
| 82 TAK1 ---> c-Jun                    | 104 TAK1 ---> c-Jun                | -2,1965545 |
| 83 Epo ---Lyn---> STAT5A              | 107 Epo ---Lyn---> STAT5A          | -2,1965545 |
| 84 Caspase-6 ---> Caspase-3           | 108 Caspase-6 ---> Caspase-3       | -2,1965545 |
| 85 MEKK2 ---> ATF-2                   | 109 MEKK2 ---> ATF-2               | -2,1965545 |
| 86 ASK1 ---> p38alpha                 | 29 ASK1 ---> p38alpha              | 530,228483 |
| 247 VEGF-A ---> PLA2                  | 189 VEGF-A ---> PLA2               | 83,7419762 |
| 219 VEGF-A ---/ Caspase-9, Bad        | 253 VEGF-A ---/ Caspase-9, Bad     | -30,246301 |
| 220 IL-12 - STAT4 pathway             | 254 IL-12 - STAT4 pathway          | -30,246301 |
| 221 IL-12 ---> STAT4                  | 255 IL-12 ---> STAT4               | -30,246301 |
| 235 beta-catenin network              | 238 beta-catenin network           | -9,110268  |
| 240 PDGF A ---> ERK                   | 277 PDGF A ---> ERK                | -0,2337906 |
| 241 PDGF B ---> ERK                   | 279 PDGF B ---> ERK                | -0,2337906 |
| 252 BCR ---> ERK                      | 259 BCR ---> ERK                   | 38,8039114 |
| 253 TNF-alpha ---> NFkappaB           | 187 TNF-alpha ---> NFkappaB        | 321,813715 |
| 216 TBK1:TRIF:IKK-i ---> p50:RelA     | 137 TBK1:TRIF:IKK-i ---> p50:Rel   | 90,7259346 |
| 217 LPS ---> IRF-3:IRF-7:CBP:p300     | 269 LPS ---> IRF-3:IRF-7:CBP:p300  | 22,9471847 |
| 102 MKP-5 ---/ p53; MKK4 ---> p53     | 121 MKP-5 ---/ p53; MKK4 ---> p53  | 0,41061544 |
| 103 VEGF-A ---> STAT1alpha            | 217 VEGF-A ---> STAT1alpha         | -87,190329 |
| 104 PRL ---> Jak2                     | 123 PRL ---> Jak2                  | 0,41061544 |
| 105 PDGF B ---> Src                   | 124 PDGF B ---> Src                | 0,41061544 |
| 106 LMW-PTP ---/ VEGFR-1              | 219 LMW-PTP ---/ VEGFR-1           | -87,190329 |
| 107 PDGF A ---> Src                   | 125 PDGF A ---> Src                | 0,41061544 |

|                                     |                                    |            |
|-------------------------------------|------------------------------------|------------|
| 108 SHP-1 ---/ ErbB1                | 126 SHP-1 ---/ ErbB1               | 0,41061544 |
| 109 CD148 ---/ PDGFRbeta            | 127 CD148 ---/ PDGFRbeta           | 0,41061544 |
| 110 PRL ---Jak2---> STAT5A          | 128 PRL ---Jak2---> STAT5A         | 0,41061544 |
| 232 ZAP-70 ---> Elk-1               | 276 ZAP-70 ---> Elk-1              | 22,2595101 |
| 233 AKT, MAPKAPK2 ---/ tuberlin     | 278 AKT, MAPKAPK2 ---/ tuberlin    | 22,2595101 |
| 133 Smac ---/ cIAP-2                | 58 Smac ---/ cIAP-2                | 279,928006 |
| 134 PRL ---Src---> STAT5B           | 143 PRL ---Src---> STAT5B          | 1,39749603 |
| 135 Smac ---> Caspase-3             | 144 Smac ---> Caspase-3            | 1,39749603 |
| 136 PTEN ---/ AKT-1                 | 145 PTEN ---/ AKT-1                | 1,39749603 |
| 138 Epo ---> STAT5                  | 147 Epo ---> STAT5                 | 1,39749603 |
| 139 Smac ---/ cIAP-1                | 60 Smac ---/ cIAP-1                | 279,928006 |
| 140 EDAR ---> TRAF2                 | 149 EDAR ---> TRAF2                | 1,39749603 |
| 163 PDGF B ---> STATs               | 182 PDGF B ---> STATs              | 2,19846028 |
| 164 JNK1 ---> Bax                   | 183 JNK1 ---> Bax                  | 2,19846028 |
| 165 Nod1 ---> Caspase-9             | 93 Nod1 ---> Caspase-9             | 220,444554 |
| 166 JLP ---> JNK1                   | 94 JLP ---> JNK1                   | 220,444554 |
| 181 SLP-65 ---/ Raf-1               | 211 SLP-65 ---/ Raf-1              | 3,22986519 |
| 182 c-Kit pathway                   | 275 c-Kit pathway                  | -45,504717 |
| 197 Fer ---> beta-cateninp{Tyr142}  | 225 Fer ---> beta-cateninp{Tyr142} | 3,78142273 |
| 198 PDGF A ---> AKT-1               | 226 PDGF A ---> AKT-1              | 3,78142273 |
| 200 PDGF B ---> AKT-1               | 231 PDGF B ---> AKT-1              | 3,78142273 |
| 201 CHIP ---/ Pael-R                | 159 CHIP ---/ Pael-R               | 129,765654 |
| 226 EGF ---> DAG, IP3               | 250 EGF ---> DAG, IP3              | 4,32747126 |
| 227 Src ---> Rac1                   | 251 Src ---> Rac1                  | 4,32747126 |
| 228 Rac1 ---> c-Jun, Elk-1          | 252 Rac1 ---> c-Jun, Elk-1         | 4,32747126 |
| 236 Csk, CD45 ---> Lck              | 262 Csk, CD45 ---> Lck             | 3,99950374 |
| 244 Csk, CD45 ---> Fyn              | 280 Csk, CD45 ---> Fyn             | -0,0297741 |
| 209 PDGF A ---> DAG, IP3            | 204 PDGF A ---> DAG, IP3           | 21,7991272 |
| 212 PDGF B --> DAG, IP3             | 205 PDGF B --> DAG, IP3            | 21,7991272 |
| 213 PI3K ---/ p53                   | 206 PI3K ---/ p53                  | 21,7991272 |
| 44 Trx ---/ ASK1                    | 48 Trx ---/ ASK1                   | 1,56437084 |
| 237 VHL ---> HIF-1alpha degradation | 235 VHL ---> HIF-1alpha degradatic | 14,1141785 |
| 245 activin A ---> Smad2            | 178 activin A ---> Smad2           | 148,741582 |
| 246 activin A ---> Smad3            | 179 activin A ---> Smad3           | 148,741582 |
| 121 MKK6 ---> Hsp27                 | 138 MKK6 ---> Hsp27                | 1,76051139 |
| 154 MEK-1 ---> HIF-1alpha           | 165 MEK-1 ---> HIF-1alpha          | 1,49529836 |
| 155 p38alpha ---> CREB              | 167 p38alpha ---> CREB             | 1,49529836 |
| 156 MKK4 ---/ RXR-alpha             | 170 MKK4 ---/ RXR-alpha            | 1,49529836 |
| 157 MLK2 ---MKK3---> p38alpha       | 72 MLK2 ---MKK3---> p38alpha       | 144,308366 |
| 159 MLK2 ---MKK6---> p38alpha       | 73 MLK2 ---MKK6---> p38alpha       | 144,308366 |
| 160 TAK1 ---> p38alpha              | 74 TAK1 ---> p38alpha              | 144,308366 |
| 161 MEKK4 ---> JNK1                 | 176 MEKK4 ---> JNK1                | 1,49529836 |
| 255 FasL ---> Caspase-3             | 31 FasL ---> Caspase-3             | 1857,8568  |
| 256 Caspase-3 ---/ p53              | 265 Caspase-3 ---/ p53             | 9,08069709 |



|                                      |                                     |            |
|--------------------------------------|-------------------------------------|------------|
| 257 IL-8 ---> ERK2                   | 266 IL-8 ---> ERK2                  | 9,08069709 |
| 258 EGF ---> PLD2                    | 232 EGF ---> PLD2                   | 47,3696495 |
| 260 Eps15 ---> ErbB internalization  | 267 Eps15 ---> ErbB internalization | 9,08069709 |
| 261 Hsp90 ---> AhR                   | 268 Hsp90 ---> AhR                  | 9,08069709 |
| 171 MEKK3 ---> ATF-2                 | 97 MEKK3 ---> ATF-2                 | 110,386743 |
| 172 MKK7 ---> c-Jun                  | 195 MKK7 ---> c-Jun                 | 2,01806138 |
| 173 p38alpha ---> STAT3              | 105 p38alpha ---> STAT3             | 110,386743 |
| 174 JNK2 ---> doublecortin           | 106 JNK2 ---> doublecortin          | 110,386743 |
| 175 PP2Calpha ---/ MKK4              | 198 PP2Calpha ---/ MKK4             | 2,01806138 |
| 176 PP2Calpha ---/ MKK6              | 199 PP2Calpha ---/ MKK6             | 2,01806138 |
| 190 EGF ---> N-WASP                  | 218 EGF ---> N-WASP                 | 2,2207444  |
| 191 Fas ---/ SRF                     | 220 Fas ---/ SRF                    | 2,2207444  |
| 192 Fas ---/ NuMA                    | 221 Fas ---/ NuMA                   | 2,2207444  |
| 193 Unc18-1 ---/ PLD2                | 129 Unc18-1 ---/ PLD2               | 89,8216893 |
| 194 Rac1 ---> p38                    | 222 Rac1 ---> p38                   | 2,2207444  |
| 222 E1 ---/ cyclin E                 | 244 E1 ---/ cyclin E                | 2,10795394 |
| 223 Rac1 ---> golgin-160             | 245 Rac1 ---> golgin-160            | 2,10795394 |
| 224 MKK4 ---/ PPAR-gamma             | 246 MKK4 ---/ PPAR-gamma            | 2,10795394 |
| 225 PDGF B ---> cortactin            | 247 PDGF B ---> cortactin           | 2,10795394 |
| 248 Rac1 ---MLK3---> c-Jun           | 281 Rac1 ---MLK3---> c-Jun          | -0,2674844 |
| 249 HB-EGF ---> PI3K                 | 282 HB-EGF ---> PI3K                | -0,2674844 |
| 250 Hsp90 ---> AhR                   | 284 Hsp90 ---> AhR                  | -0,2674844 |
| 239 POSH ---> JNK1, JNK2             | 263 POSH ---> JNK1, JNK2            | 2,5779047  |
| 262 Apo2L ---Caspase-8---> Caspase-3 | 51 Apo2L ---Caspase-8---> Caspas    | 688,758864 |



### High vs low 3 table 13

| Control Rank | Pathway name                 | Sample Rank | Pathway name                 | Delta Score |
|--------------|------------------------------|-------------|------------------------------|-------------|
|              | 1 stress-associated pathways |             | 1 stress-associated pathway: | 31017723,2  |
| 6            | EGF pathway                  | 7           | EGF pathway                  | -452781,32  |
| 2            | p38 pathway                  | 4           | p38 pathway                  | -283765,24  |
| 10           | JNK pathway                  | 2           | JNK pathway                  | 912668,16   |
| 9            | Fas pathway                  | 3           | Fas pathway                  | 362049,87   |
| 4            | Epo pathway                  | 9           | Epo pathway                  | -122692,81  |
| 3            | RANKL pathway                | 6           | RANKL pathway                | -119830,57  |
| 11           | PRL pathway                  | 19          | PRL pathway                  | -74662,911  |
| 29           | Caspase network              | 21          | Caspase network              | 76117,4736  |
| 5            | BMP2 ---> p38alpha           | 5           | BMP2 ---> p38alpha           | -13346,886  |
| 18           | Apo2L pathway                | 26          | Apo2L pathway                | -13414,263  |
| 39           | TGFbeta pathway              | 110         | TGFbeta pathway              | -15427,815  |
| 8            | TAK1 ---> ATF-2              | 12          | TAK1 ---> ATF-2              | -6114,3767  |
| 104          | T-cell antigen receptor pat  | 115         | T-cell antigen receptor pat  | -1432,2909  |
| 12           | RANKL ---> MITF              | 16          | RANKL ---> MITF              | -4119,7091  |
| 80           | B-cell antigen receptor pat  | 120         | B-cell antigen receptor pa   | -4560,7731  |
| 14           | Epo ---> ERK1                | 20          | Epo ---> ERK1                | -3002,5293  |
| 125          | insulin pathway              | 130         | insulin pathway              | -161,93997  |
| 7            | EGF ---> PAK1                | 8           | EGF ---> PAK1                | -2044,2147  |
| 77           | PDGF pathway                 | 80          | PDGF pathway                 | 1301,63304  |
| 40           | alpha Iib beta3 pathway      | 53          | alpha Iib beta3 pathway      | -2079,6905  |
| 41           | alpha Iib beta3 ---> Rac1    | 54          | alpha Iib beta3 ---> Rac1    | -2079,6905  |
| 21           | EGF ---> ERK                 | 27          | EGF ---> ERK                 | -1720,3506  |
| 106          | IL-1 pathway                 | 139         | IL-1 pathway                 | -1504,5523  |
| 179          | E2F network                  | 131         | E2F network                  | 2401,48046  |
| 17           | ZAP-70 ---> c-Jun            | 23          | ZAP-70 ---> c-Jun            | -1368,6132  |
| 16           | wnt pathway                  | 15          | wnt pathway                  | 2471,89724  |
| 15           | JNK1 ---> MKK4               | 11          | JNK1 ---> MKK4               | 9877,64275  |
| 27           | IL-1beta ---> c-Jun          | 38          | IL-1beta ---> c-Jun          | -1067,0934  |
| 124          | TLR3 pathway                 | 81          | TLR3 pathway                 | 4306,91353  |
| 46           | IL-1beta ---> Elk-1          | 77          | IL-1beta ---> Elk-1          | -973,87927  |
| 19           | EGF ---> PI3K-C2beta         | 24          | EGF ---> PI3K-C2beta         | -799,14232  |
| 20           | RANKL ---> JNK1              | 25          | RANKL ---> JNK1              | -799,14232  |
| 42           | RhoA ---> stress fiber forr  | 78          | RhoA ---> stress fiber forr  | -545,35785  |
| 43           | RhoA pathway                 | 79          | RhoA pathway                 | -545,35785  |
| 26           | Epo ---> IP3, PtsIns(3,4)P   | 35          | Epo ---> IP3, PtsIns(3,4)P   | -792,54536  |
| 78           | IL-8 pathway                 | 17          | IL-8 pathway                 | 13360,3529  |
| 192          | p53 pathway                  | 193         | p53 pathway                  | 223,289628  |
| 13           | c-Cbl ---/ ErBB1             | 18          | c-Cbl ---/ ErBB1             | -675,6487   |
| 98           | neurotensin pathway          | 10          | neurotensin pathway          | 30093,0707  |
| 47           | fMLP pathway                 | 33          | fMLP pathway                 | 1217,5052   |
| 198          | TLR4 pathway                 | 34          | TLR4 pathway                 | 25663,6445  |
| 24           | FasL ---> Caspase-3          | 31          | FasL ---> Caspase-3          | -584,32283  |
| 25           | EGF ---> c-Fos               | 32          | EGF ---> c-Fos               | -584,32283  |
| 38           | parkin associated pathway    | 76          | parkin associated pathway    | -529,18745  |
| 127          | EDAR pathway                 | 152         | EDAR pathway                 | -507,58105  |

|                                 |                                 |            |
|---------------------------------|---------------------------------|------------|
| 158 IL-1beta ---> p50:RelA      | 190 IL-1beta ---> p50:RelA      | -451,03372 |
| 28 EDA-A2 ---> c-Jun            | 36 EDA-A2 ---> c-Jun            | -441,63407 |
| 96 LPS ---> p38                 | 13 LPS ---> p38                 | 49593,0419 |
| 123 Rac1 pathway                | 141 Rac1 pathway                | -394,79993 |
| 154 IFN pathway                 | 140 IFN pathway                 | 542,685263 |
| 101 BCR ---> c-Jun              | 119 BCR ---> c-Jun              | -375,66594 |
| 30 JIP-1 ---> APP               | 40 JIP-1 ---> APP               | -228,08622 |
| 69 LAT ---> cofilin             | 86 LAT ---> cofilin             | -232,34783 |
| 117 BCR ---> p38                | 136 BCR ---> p38                | -216,48606 |
| 197 LPS ---> NF-kappaB          | 49 LPS ---> NF-kappaB           | 6521,49613 |
| 81 Aurora-A cell cycle regula   | 55 Aurora-A cell cycle regul    | 310,08958  |
| 82 PPAR pathway                 | 56 PPAR pathway                 | 310,08958  |
| 83 Aurora-A activation, subst   | 57 Aurora-A activation, subs    | 310,08958  |
| 97 IFNgamma ---> STAT1alp       | 22 IFNgamma ---> STAT1alp       | 4573,35817 |
| 119 HIF-1alpha pathway          | 203 HIF-1alpha pathway          | -307,84543 |
| 44 Apo2L ---Caspase-8---> C     | 51 Apo2L ---Caspase-8---> C     | -173,867   |
| 45 PRL ---IRS---> PI3K          | 52 PRL ---IRS---> PI3K          | -173,867   |
| 181 G2/M phase (cyclin B:Cdk    | 202 G2/M phase (cyclin B:Cdk    | -152,14844 |
| 234 tuberin pathway             | 258 tuberin pathway             | -128,30211 |
| 150 BCR ---MLK3---> c-Jun       | 162 BCR ---MLK3---> c-Jun       | -157,77353 |
| 151 BCR ---> cytoskeletal reor  | 163 BCR ---> cytoskeletal reo   | -157,77353 |
| 152 insulin ---> glucose uptake | 164 insulin ---> glucose uptake | -157,77353 |
| 182 G1 phase (Cdk2)             | 161 G1 phase (Cdk2)             | 212,746885 |
| 65 G-alpha-q ---> arachidonic   | 111 G-alpha-q ---> arachidoni   | -172,72851 |
| 246 VEGF-A pathway              | 242 VEGF-A pathway              | 135,837489 |
| 22 EGF ---> STAT1alpha          | 28 EGF ---> STAT1alpha          | -151,83382 |
| 23 ASK1 ---> p38alpha           | 29 ASK1 ---> p38alpha           | -151,83382 |
| 103 PRL ---PI3K---> AKT         | 118 PRL ---PI3K---> AKT         | -153,76509 |
| 153 Htt pathway                 | 186 Htt pathway                 | -138,93549 |
| 205 TNF-alpha pathway           | 96 TNF-alpha pathway            | 2496,06235 |
| 66 TNF-alpha ---> c-Jun         | 82 TNF-alpha ---> c-Jun         | -136,67972 |
| 67 Caspase-9 ---> Caspases      | 83 Caspase-9 ---> Caspases      | -136,67972 |
| 68 PRL ---> PAK1                | 84 PRL ---> PAK1                | -136,67972 |
| 178 IFNalpha, IFNbeta, IFNg     | 135 IFNalpha, IFNbeta, IFNg     | 410,305023 |
| 233 insulin ---> AKT-1 pathw    | 241 insulin ---> AKT-1 pathw    | -6,5134158 |
| 105 cyclosome regulatory netw   | 85 cyclosome regulatory netv    | 207,224718 |
| 235 S phase (Cdk2)              | 209 S phase (Cdk2)              | 132,435374 |
| 130 RANKL ---> AKT              | 151 RANKL ---> AKT              | -112,36111 |
| 131 dsRNA ---> IKK-alpha:IK     | 39 dsRNA ---> IKK-alpha:IK      | 2266,28994 |
| 79 LAT ---> PKCtheta            | 37 LAT ---> PKCtheta            | 879,471684 |
| 118 p73 pathway                 | 95 p73 pathway                  | 169,196078 |
| 31 EGF ---> SHIP1               | 41 EGF ---> SHIP1               | -105,81122 |

|                                     |                                     |            |
|-------------------------------------|-------------------------------------|------------|
| 32 Cis ---/ PRLR                    | 42 Cis ---/ PRLR                    | -105,81122 |
| 33 EGF ---> STAT3                   | 43 EGF ---> STAT3                   | -105,81122 |
| 34 SOCS-1 ---/ PRL                  | 44 SOCS-1 ---/ PRL                  | -105,81122 |
| 35 Htt ---/ Caspase-8               | 45 Htt ---/ Caspase-8               | -105,81122 |
| 36 SOCS-3 ---/ EpoR                 | 46 SOCS-3 ---/ EpoR                 | -105,81122 |
| 37 SOCS-3 ---/ PRLR                 | 47 SOCS-3 ---/ PRLR                 | -105,81122 |
| 204 MHC class II ---> NF-AT         | 234 MHC class II ---> NF-AT         | -80,755644 |
| 159 LAT ---> p50:RelA               | 188 LAT ---> p50:RelA               | -85,963195 |
| 160 LPS ---> JNK                    | 14 LPS ---> JNK                     | 39096,9528 |
| 102 PRL ---> Raf-1                  | 117 PRL ---> Raf-1                  | -95,996422 |
| 126 fMLP ---> superoxide            | 112 fMLP ---> superoxide            | 138,010397 |
| 48 Smac ---/ cIAP-2                 | 58 Smac ---/ cIAP-2                 | -78,178277 |
| 49 SHP-2 ---> PRL                   | 59 SHP-2 ---> PRL                   | -78,178277 |
| 50 Smac ---/ cIAP-1                 | 60 Smac ---/ cIAP-1                 | -78,178277 |
| 51 DLK ---> c-Jun                   | 61 DLK ---> c-Jun                   | -78,178277 |
| 52 beta-arrestin2 ---> c-Jun        | 62 beta-arrestin2 ---> c-Jun        | -78,178277 |
| 53 ASK1 ---DUSP19---> c-Jun         | 64 ASK1 ---DUSP19---> c-Jun         | -78,178277 |
| 54 PRL ---Gab-2---> PI3K            | 65 PRL ---Gab-2---> PI3K            | -78,178277 |
| 55 PDGF B ---> PAK-1                | 66 PDGF B ---> PAK-1                | -78,178277 |
| 121 IFNalpha, IFNbeta ---> PI       | 208 IFNalpha, IFNbeta ---> PI       | -297,68993 |
| 122 dsRNA ---> c-Jun                | 30 dsRNA ---> c-Jun                 | 2470,77455 |
| 132 cyclosome regulation            | 116 cyclosome regulation            | 112,444851 |
| 133 LAT ---> Ras                    | 153 LAT ---> Ras                    | -64,924593 |
| 134 LAT ---> MLC                    | 154 LAT ---> MLC                    | -64,924593 |
| 135 MHC class I ---> LAT            | 155 MHC class I ---> LAT            | -64,924593 |
| 70 MKK3 ---> HNF-1alpha             | 87 MKK3 ---> HNF-1alpha             | -60,409243 |
| 71 Epo ---> SHP-1                   | 88 Epo ---> SHP-1                   | -60,409243 |
| 72 GH pathway                       | 89 GH pathway                       | -60,409243 |
| 73 PDGF A ---> Crk                  | 90 PDGF A ---> Crk                  | -60,409243 |
| 74 Apo2L ---> Caspase-10            | 91 Apo2L ---> Caspase-10            | -60,409243 |
| 75 GH ---> Grb-2                    | 92 GH ---> Grb-2                    | -60,409243 |
| 76 Nod1 ---> Caspase-9              | 93 Nod1 ---> Caspase-9              | -60,409243 |
| 245 BCR ---> NF-AT                  | 210 BCR ---> NF-AT                  | 56,1698754 |
| 99 insulin ---Jak1---> IRS-1, Shc   | 113 insulin ---Jak1---> IRS-1, Shc  | -48,292914 |
| 100 Src ---> Rap2B                  | 114 Src ---> Rap2B                  | -48,292914 |
| 201 Plk1 activation and substrates  | 256 Plk1 activation and substrates  | 35,3661315 |
| 202 insulin ---Shc---> MAPK cascade | 191 insulin ---Shc---> MAPK cascade | 56,1393576 |
| 203 Plk1 cell cycle regulation      | 257 Plk1 cell cycle regulation      | 35,3661315 |
| 200 PRL ---Src,FAK1---> ERK1/2      | 223 PRL ---Src,FAK1---> ERK1/2      | -34,213946 |
| 120 Epo ---> PIP3                   | 133 Epo ---> PIP3                   | -39,645579 |
| 232 OSM pathway                     | 201 OSM pathway                     | 43,5105476 |
| 129 VEGF-A ---> PLA2                | 189 VEGF-A ---> PLA2                | -27,478189 |
| 136 IFNalpha, IFNbeta ---> STAT1    | 228 IFNalpha, IFNbeta ---> STAT1    | -161,65268 |
| 137 Apaf-1 ---> Caspase-7           | 156 Apaf-1 ---> Caspase-7           | -35,668449 |
| 138 Apaf-1 ---> Caspase-3           | 157 Apaf-1 ---> Caspase-3           | -35,668449 |
| 139 CD19 ---> PLCgamma2             | 158 CD19 ---> PLCgamma2             | -35,668449 |
| 191 OSM ---> ERK                    | 181 OSM ---> ERK                    | 39,4027149 |
| 155 activin A ---> Smad2            | 178 activin A ---> Smad2            | -28,557798 |

|                                  |                                  |            |
|----------------------------------|----------------------------------|------------|
| 156 activin A ---> Smad3         | 179 activin A ---> Smad3         | -28,557798 |
| 157 PRL ---Fyn---> PI3K          | 180 PRL ---Fyn---> PI3K          | -28,557798 |
| 56 ErbB1 ---> endophilin 1       | 67 ErbB1 ---> endophilin 1       | -28,999313 |
| 57 TAO1 ---> p38alpha            | 68 TAO1 ---> p38alpha            | -28,999313 |
| 58 MLK2 ---> JNK1                | 69 MLK2 ---> JNK1                | -28,999313 |
| 59 TAO2 ---MKK6---> p38a         | 70 TAO2 ---MKK6---> p38a         | -28,999313 |
| 60 E1 ---/ ErbB3                 | 71 E1 ---/ ErbB3                 | -28,999313 |
| 61 MLK2 ---MKK3---> p38a         | 72 MLK2 ---MKK3---> p38a         | -28,999313 |
| 62 MLK2 ---MKK6---> p38a         | 73 MLK2 ---MKK6---> p38a         | -28,999313 |
| 63 TAK1 ---> p38alpha            | 74 TAK1 ---> p38alpha            | -28,999313 |
| 64 TAO2 ---MKK3---> p38a         | 75 TAO2 ---MKK3---> p38a         | -28,999313 |
| 252 dsRNA ---> p50:RelA          | 207 dsRNA ---> p50:RelA          | 208,909388 |
| 84 MEKK3 ---> ATF-2              | 97 MEKK3 ---> ATF-2              | -23,30854  |
| 85 MEKK2 ---MKK7---> JNK1        | 98 MEKK2 ---MKK7---> JNK1        | -23,30854  |
| 86 MEKK2 ---> ATF-2              | 99 MEKK2 ---> ATF-2              | -23,30854  |
| 87 GCK ---> MKK4                 | 100 GCK ---> MKK4                | -23,30854  |
| 88 PDGF A ---> SHP-2             | 101 PDGF A ---> SHP-2            | -23,30854  |
| 89 MKK4 ---> c-Jun               | 102 MKK4 ---> c-Jun              | -23,30854  |
| 90 PDGF B ---> PKR               | 103 PDGF B ---> PKR              | -23,30854  |
| 91 TAK1 ---> c-Jun               | 104 TAK1 ---> c-Jun              | -23,30854  |
| 92 p38alpha ---> STAT3           | 105 p38alpha ---> STAT3          | -23,30854  |
| 93 JNK2 ---> doublecortin        | 106 JNK2 ---> doublecortin       | -23,30854  |
| 94 Epo ---Lyn---> STAT5A         | 107 Epo ---Lyn---> STAT5A        | -23,30854  |
| 95 MEKK2 ---> ATF-2              | 109 MEKK2 ---> ATF-2             | -23,30854  |
| 230 IFNalpha, IFNbeta ---> STAT1 | 261 IFNalpha, IFNbeta ---> STAT1 | -71,995231 |
| 231 insulin ---IRS---> PRK2, SHC | 240 insulin ---IRS---> PRK2, SHC | -17,286528 |
| 247 mTOR ----> S6, eIF-4E        | 260 mTOR ----> S6, eIF-4E        | -13,968232 |
| 257 ZAP-70 ---> Elk-1            | 276 ZAP-70 ---> Elk-1            | -20,275344 |
| 258 PDGF A ---> ERK              | 277 PDGF A ---> ERK              | -20,275344 |
| 259 AKT, MAPKAPK2 ---/ tyrosine  | 278 AKT, MAPKAPK2 ---/ tyrosine  | -20,275344 |
| 260 PDGF B ---> ERK              | 279 PDGF B ---> ERK              | -20,275344 |
| 268 BCR ---> ERK                 | 259 BCR ---> ERK                 | 15,8630351 |
| 269 TNF-alpha ---> NFkappaB      | 187 TNF-alpha ---> NFkappaB      | 298,872839 |
| 107 MKP-5 ---/ p53; MKK4 --      | 121 MKP-5 ---/ p53; MKK4 --      | -17,273991 |
| 108 VEGF-A ---> Ras              | 122 VEGF-A ---> Ras              | -17,273991 |
| 109 PKCdelta ---> GRK2           | 216 PKCdelta ---> GRK2           | -104,87494 |
| 110 PRL ---> Jak2                | 123 PRL ---> Jak2                | -17,273991 |
| 111 PDGF B ---> Src              | 124 PDGF B ---> Src              | -17,273991 |
| 112 PDGF A ---> Src              | 125 PDGF A ---> Src              | -17,273991 |
| 113 SHP-1 ---/ ErbB1             | 126 SHP-1 ---/ ErbB1             | -17,273991 |
| 114 CD148 ---/ PDGFRbeta         | 127 CD148 ---/ PDGFRbeta         | -17,273991 |
| 115 PRL ---Jak2---> STAT5A       | 128 PRL ---Jak2---> STAT5A       | -17,273991 |
| 116 Unc18-1 ---/ PLD2            | 129 Unc18-1 ---/ PLD2            | -17,273991 |
| 140 MLK2 ---> NeuroD             | 142 MLK2 ---> NeuroD             | -14,184889 |

|                                     |                                     |            |
|-------------------------------------|-------------------------------------|------------|
| 141 PRL ---Src--> STAT5B            | 143 PRL ---Src--> STAT5B            | -14,184889 |
| 142 Smac ---> Caspase-3             | 144 Smac ---> Caspase-3             | -14,184889 |
| 143 PTEN ---/ AKT-1                 | 145 PTEN ---/ AKT-1                 | -14,184889 |
| 144 Smurf-1 ---/ Smad7, TGF $\beta$ | 146 Smurf-1 ---/ Smad7, TGF $\beta$ | -14,184889 |
| 145 Epo ---> STAT5                  | 147 Epo ---> STAT5                  | -14,184889 |
| 146 Htt ---> Ca                     | 148 Htt ---> Ca                     | -14,184889 |
| 147 EDAR ---> TRAF2                 | 149 EDAR ---> TRAF2                 | -14,184889 |
| 148 ASK1 ---MKK4--> JNK1            | 63 ASK1 ---MKK4--> JNK1             | 264,345621 |
| 149 Fas ---/ Cdc42                  | 150 Fas ---/ Cdc42                  | -14,184889 |
| 251 beta-catenin network            | 238 beta-catenin network            | 12,8523221 |
| 161 PDGF B ---> STATs               | 182 PDGF B ---> STATs               | -11,957761 |
| 162 JNK1 ---> Bax                   | 183 JNK1 ---> Bax                   | -11,957761 |
| 163 Htt ---> NeuroD                 | 184 Htt ---> NeuroD                 | -11,957761 |
| 164 JLP ---> JNK1                   | 94 JLP ---> JNK1                    | 206,288333 |
| 262 VEGF-A ---/ Caspase-9, B        | 253 VEGF-A ---/ Caspase-9, B        | 10,121627  |
| 263 IL-12 - STAT4 pathway           | 254 IL-12 - STAT4 pathway           | 10,121627  |
| 264 IL-12 ---> STAT4                | 255 IL-12 ---> STAT4                | 10,121627  |
| 193 PDGF B ---SHP-2--> Ras          | 132 PDGF B ---SHP-2--> Ras          | 140,356528 |
| 194 BMP7 ---> Smad1, Smad5          | 271 BMP7 ---> Smad1, Smad5          | -57,823399 |
| 195 SLP-65 ---/ Raf-1               | 211 SLP-65 ---/ Raf-1               | -9,0888174 |
| 196 PDGF B---/ Ras                  | 134 PDGF B---/ Ras                  | 140,356528 |
| 199 EDA-A2 ---TRAF3--> N            | 192 EDA-A2 ---TRAF3--> N            | 12,574875  |
| 216 IL-22 ---> STAT1alpha, S        | 224 IL-22 ---> STAT1alpha, S        | -8,0398734 |
| 217 Fer ---> beta-catenin{Ty        | 225 Fer ---> beta-catenin{Ty        | -8,0398734 |
| 218 PDGF A ---> AKT-1               | 226 PDGF A ---> AKT-1               | -8,0398734 |
| 219 IL-22 pathway                   | 227 IL-22 pathway                   | -8,0398734 |
| 220 IL-10 pathway                   | 229 IL-10 pathway                   | -8,0398734 |
| 221 PDK1 ---> 4E-BP1, p70S6         | 230 PDK1 ---> 4E-BP1, p70S6         | -8,0398734 |
| 222 PDGF B ---> AKT-1               | 231 PDGF B ---> AKT-1               | -8,0398734 |
| 223 EGF ---> PLD2                   | 232 EGF ---> PLD2                   | -8,0398734 |
| 224 IL-10 ---> STAT1alpha, S        | 233 IL-10 ---> STAT1alpha, S        | -8,0398734 |
| 225 CHIP ---/ Pael-R                | 159 CHIP ---/ Pael-R                | 117,944358 |
| 226 Src ---/ RhoA                   | 160 Src ---/ RhoA                   | 117,944358 |
| 241 TGFbeta ---> Smad2, Sma         | 249 TGFbeta ---> Smad2, Sma         | -7,1615409 |
| 242 EGF ---> DAG, IP3               | 250 EGF ---> DAG, IP3               | -7,1615409 |
| 243 Src ---> Rac1                   | 251 Src ---> Rac1                   | -7,1615409 |
| 244 Rac1 ---> c-Jun, Elk-1          | 252 Rac1 ---> c-Jun, Elk-1          | -7,1615409 |
| 270 VEGF-A ---> NO                  | 239 VEGF-A ---> NO                  | 62,6233023 |
| 248 Csk, CD45 ---> Lck              | 262 Csk, CD45 ---> Lck              | -7,2872183 |
| 261 Csk, CD45 ---> Fyn              | 280 Csk, CD45 ---> Fyn              | -11,064501 |
| 227 PDGF A ---> DAG, IP3            | 204 PDGF A ---> DAG, IP3            | 9,64088429 |
| 228 PDGF B --> DAG, IP3             | 205 PDGF B --> DAG, IP3             | 9,64088429 |
| 229 PI3K ---/ p53                   | 206 PI3K ---/ p53                   | 9,64088429 |
| 273 G2/M phase (cyclin A:Cd         | 270 G2/M phase (cyclin A:Cd         | 6,13657121 |

|                                 |                                 |            |
|---------------------------------|---------------------------------|------------|
| 249 IL-4 - STAT6 pathway        | 236 IL-4 - STAT6 pathway        | 5,52841541 |
| 250 IL-4 ---> STAT6             | 237 IL-4 ---> STAT6             | 5,52841541 |
| 128 MKK6 ---> Hsp27             | 138 MKK6 ---> Hsp27             | -4,1655423 |
| 165 MEK-1 ---> HIF-1alpha       | 165 MEK-1 ---> HIF-1alpha       | -3,491721  |
| 166 MKK6 ---/ MRF4              | 166 MKK6 ---/ MRF4              | -3,491721  |
| 167 p38alpha ---> CREB          | 167 p38alpha ---> CREB          | -3,491721  |
| 168 E1 ---/ alpha-tubulin       | 168 E1 ---/ alpha-tubulin       | -3,491721  |
| 169 MKK6 ---> p53               | 169 MKK6 ---> p53               | -3,491721  |
| 170 MKK4 ---/ RXR-alpha         | 170 MKK4 ---/ RXR-alpha         | -3,491721  |
| 171 MKK4 ---p38alpha---> A1     | 171 MKK4 ---p38alpha---> A'     | -3,491721  |
| 172 E1 ---/ synaptotagmin-11    | 172 E1 ---/ synaptotagmin-11    | -3,491721  |
| 173 E1 ---/ beta-tubulin        | 173 E1 ---/ beta-tubulin        | -3,491721  |
| 174 E1 ---/ Septin5             | 174 E1 ---/ Septin5             | -3,491721  |
| 175 E1 ---dorfin---/ synphilin- | 175 E1 ---dorfin---/ synphilin- | -3,491721  |
| 176 MEKK4 ---> JNK1             | 176 MEKK4 ---> JNK1             | -3,491721  |
| 177 E1 ---parkin---/ synphilin- | 177 E1 ---parkin---/ synphilin- | -3,491721  |
| 271 IL-8 ---> ERK2              | 266 IL-8 ---> ERK2              | 3,03070947 |
| 272 Eps15 ---> ErbB internaliz  | 267 Eps15 ---> ErbB internaliz  | 3,03070947 |
| 183 inhibitory phosphorylation  | 194 inhibitory phosphorylation  | -3,0116178 |
| 184 MKK7 ---> c-Jun             | 195 MKK7 ---> c-Jun             | -3,0116178 |
| 185 EDA-A2 ---> TRAF6           | 196 EDA-A2 ---> TRAF6           | -3,0116178 |
| 186 Fas ---> Caspase-8          | 197 Fas ---> Caspase-8          | -3,0116178 |
| 187 PP2Calpha ---/ MKK4         | 198 PP2Calpha ---/ MKK4         | -3,0116178 |
| 188 PP2Calpha ---/ MKK6         | 199 PP2Calpha ---/ MKK6         | -3,0116178 |
| 189 Caspase-6 ---> Caspase-3    | 108 Caspase-6 ---> Caspase-3    | 105,357064 |
| 190 MEKK4 --MKK6---> AT1        | 200 MEKK4 --MKK6---> AT         | -3,0116178 |
| 206 Rac1 ---/ cofilin           | 213 Rac1 ---/ cofilin           | -2,6491513 |
| 207 Fas ---> Abl                | 214 Fas ---> Abl                | -2,6491513 |
| 208 E1 ---/ alpha-synuclein     | 215 E1 ---/ alpha-synuclein     | -2,6491513 |
| 209 VEGF-A ---> STAT1alph:      | 217 VEGF-A ---> STAT1alph       | -2,6491513 |
| 210 EGF ---> N-WASP             | 218 EGF ---> N-WASP             | -2,6491513 |
| 211 LMW-PTP ---/ VEGFR-1        | 219 LMW-PTP ---/ VEGFR-1        | -2,6491513 |
| 212 Fas ---/ SRF                | 220 Fas ---/ SRF                | -2,6491513 |
| 213 Fas ---/ NuMA               | 221 Fas ---/ NuMA               | -2,6491513 |
| 215 Rac1 ---> p38               | 222 Rac1 ---> p38               | -2,6491513 |
| 236 Fas ---/ PRK2               | 243 Fas ---/ PRK2               | -2,7004841 |
| 237 E1 ---/ cyclin E            | 244 E1 ---/ cyclin E            | -2,7004841 |
| 238 Rac1 ---> golgin-160        | 245 Rac1 ---> golgin-160        | -2,7004841 |
| 239 MKK4 ---/ PPAR-gamma        | 246 MKK4 ---/ PPAR-gamma        | -2,7004841 |
| 240 PDGF B ---> cortactin       | 247 PDGF B ---> cortactin       | -2,7004841 |
| 265 Rac1 ---MLK3---> c-Jun      | 281 Rac1 ---MLK3---> c-Jun      | -5,056243  |
| 266 HB-EGF ---> PI3K            | 282 HB-EGF ---> PI3K            | -5,056243  |
| 267 c-Jun degradation           | 283 c-Jun degradation           | -5,056243  |
| 253 POSH ---> JNK1, JNK2        | 263 POSH ---> JNK1, JNK2        | -2,1714319 |
| 254 Fas ---> Caspase-2          | 185 Fas ---> Caspase-2          | 62,2549625 |



|                          |                          |            |
|--------------------------|--------------------------|------------|
| 255 Ubc9 ---/ p73alpha   | 264 Ubc9 ---/ p73alpha   | -2,1714319 |
| 274 IL-2 ---> STAT5      | 272 IL-2 ---> STAT5      | 2,19204114 |
| 275 IL-2 - STAT5 pathway | 273 IL-2 - STAT5 pathway | 2,19204114 |
| 276 OSM ---> STAT1       | 274 OSM ---> STAT1       | 2,19204114 |
| 277 c-Kit pathway        | 275 c-Kit pathway        | 2,19204114 |

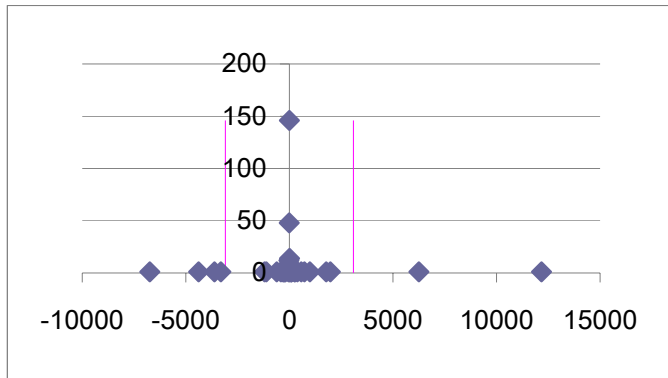

**High vs low 4 table 14**

| Control Rank | Pathway name                 | Sample Rank | Pathway name                 | Delta Score |
|--------------|------------------------------|-------------|------------------------------|-------------|
|              | 1 stress-associated pathways |             | 1 stress-associated pathways | 107840053   |
|              | 4 JNK pathway                |             | 2 JNK pathway                | 1424671,53  |
|              | 7 EGF pathway                |             | 4 EGF pathway                | 1192348,13  |
|              | 3 Epo pathway                |             | 8 Epo pathway                | -78091,12   |
|              | 8 PRL pathway                |             | 13 PRL pathway               | -48899,285  |
|              | 6 RANKL pathway              |             | 5 RANKL pathway              | 95745,0691  |
|              | 2 IFNgamma ---> STAT1alp     |             | 42 IFNgamma ---> STAT1alp    | -93648,662  |
| 26           | TLR3 pathway                 | 132         | TLR3 pathway                 | -22157,332  |
| 18           | IFN pathway                  | 177         | IFN pathway                  | -23691,796  |
| 60           | insulin pathway              | 106         | insulin pathway              | -12606,832  |
| 13           | IFNalpha, IFNbeta, IFNga     | 182         | IFNalpha, IFNbeta, IFNga     | -18424,553  |
| 94           | T-cell antigen receptor pat  | 99          | T-cell antigen receptor pat  | 2932,64189  |
| 42           | PDGF pathway                 | 50          | PDGF pathway                 | -3177,4749  |
|              | 68 Fas pathway               |             | 6 Fas pathway                | 452768,761  |
| 11           | Epo ---> ERK1                | 16          | Epo ---> ERK1                | -1584,8359  |
|              | 9 BMP2 ---> p38alpha         |             | 7 BMP2 ---> p38alpha         | 24021,6487  |
| 87           | TLR4 pathway                 | 216         | TLR4 pathway                 | -7120,6804  |
| 100          | E2F network                  | 155         | E2F network                  | -2434,2321  |
|              | 5 EGF ---> PAK1              |             | 9 EGF ---> PAK1              | -981,45594  |
| 111          | B-cell antigen receptor pat  | 102         | B-cell antigen receptor pat  | 2293,37592  |
| 40           | alpha Iib beta3 pathway      | 45          | alpha Iib beta3 pathway      | -1090,3469  |
|              | 41 alpha Iib beta3 ---> Rac1 |             | 46 alpha Iib beta3 ---> Rac1 | -1090,3469  |
| 19           | EGF ---> ERK                 | 23          | EGF ---> ERK                 | -891,04332  |
| 99           | IL-1 pathway                 | 122         | IL-1 pathway                 | -805,5383   |
| 208          | Caspase network              | 28          | Caspase network              | 76736,688   |
| 15           | ZAP-70 ---> c-Jun            | 19          | ZAP-70 ---> c-Jun            | -691,34781  |
| 43           | IL-8 pathway                 | 17          | IL-8 pathway                 | 7698,85951  |
| 74           | p38 pathway                  | 3           | p38 pathway                  | 397829,934  |
| 12           | TAK1 ---> ATF-2              | 11          | TAK1 ---> ATF-2              | 12984,4226  |
| 14           | wnt pathway                  | 15          | wnt pathway                  | 1358,07488  |
| 47           | neurotensin pathway          | 18          | neurotensin pathway          | 6493,4114   |
| 28           | IL-1beta ---> c-Jun          | 33          | IL-1beta ---> c-Jun          | -581,58895  |
| 20           | RANKL ---> MITF              | 12          | RANKL ---> MITF              | 7479,01448  |
|              | 21 dsRNA ---> c-Jun          |             | 129 dsRNA ---> c-Jun         | -3549,498   |
| 178          | p53 pathway                  | 205         | p53 pathway                  | -1165,0357  |
| 16           | EGF ---> PI3K-C2beta         | 20          | EGF ---> PI3K-C2beta         | -387,23403  |
| 17           | RANKL ---> JNK1              | 21          | RANKL ---> JNK1              | -387,23403  |
| 27           | Epo ---> IP3, PtsIns(3,4)P   | 29          | Epo ---> IP3, PtsIns(3,4)P   | -391,27774  |
| 10           | c-Cbl ---/ ErBB1             | 14          | c-Cbl ---/ ErBB1             | -315,13274  |
| 48           | RhoA ---> stress fiber forr  | 85          | RhoA ---> stress fiber forr  | -733,48178  |
| 49           | RhoA pathway                 | 86          | RhoA pathway                 | -733,48178  |
| 57           | fMLP pathway                 | 43          | fMLP pathway                 | 688,606723  |
| 22           | EGF ---> c-Fos               | 27          | EGF ---> c-Fos               | -279,40627  |
| 142          | Apo2L pathway                | 22          | Apo2L pathway                | 23961,9063  |
| 151          | IL-1beta ---> p50:RelA       | 180         | IL-1beta ---> p50:RelA       | -207,30864  |
| 196          | TGFbeta pathway              | 47          | TGFbeta pathway              | 17700,0518  |

|                                 |                                 |            |
|---------------------------------|---------------------------------|------------|
| 89 BCR ---> c-Jun               | 107 BCR ---> c-Jun              | -185,02177 |
| 90 IL-1beta ---> Elk-1          | 51 IL-1beta ---> Elk-1          | 1540,21023 |
| 124 G2/M phase (cyclin B:Cdk    | 184 G2/M phase (cyclin B:Cdk    | -803,99576 |
| 29 Aurora-A cell cycle regula   | 73 Aurora-A cell cycle regula   | -473,56739 |
| 30 Aurora-A activation, subst   | 75 Aurora-A activation, subst   | -473,56739 |
| 69 dsRNA ---> IKK-alpha:IK      | 135 dsRNA ---> IKK-alpha:IK     | -931,93467 |
| 24 GH pathway                   | 79 GH pathway                   | -1117,7039 |
| 25 GH ---> Grb-2                | 82 GH ---> Grb-2                | -1117,7039 |
| 88 parkin associated pathway    | 30 parkin associated pathway    | 1519,91297 |
| 202 VEGF-A pathway              | 234 VEGF-A pathway              | -74,936232 |
| 31 JIP-1 ---> APP               | 34 JIP-1 ---> APP               | -101,37025 |
| 45 cyclosome regulatory netw    | 100 cyclosome regulatory netw   | -307,94802 |
| 101 BCR ---> p38                | 123 BCR ---> p38                | -92,725291 |
| 180 LPS ---> NF-kappaB          | 200 LPS ---> NF-kappaB          | -68,682794 |
| 167 Rac1 pathway                | 130 Rac1 pathway                | 638,52431  |
| 120 dsRNA ---> p50:RelA         | 248 dsRNA ---> p50:RelA         | -743,17095 |
| 46 PRL ---IRS---> PI3K          | 49 PRL ---IRS---> PI3K          | -75,799787 |
| 214 tuberin pathway             | 244 tuberin pathway             | -49,292249 |
| 215 insulin ---> AKT-1 pathwa   | 253 insulin ---> AKT-1 pathwa   | -214,95399 |
| 143 LPS ---> p38                | 101 LPS ---> p38                | 785,435643 |
| 144 BCR ---MLK3---> c-Jun       | 152 BCR ---MLK3---> c-Jun       | -68,111785 |
| 145 insulin ---> glucose uptake | 154 insulin ---> glucose uptake | -68,111785 |
| 23 EGF ---> STAT1alpha          | 24 EGF ---> STAT1alpha          | -63,569565 |
| 98 PRL ---PI3K---> AKT          | 109 PRL ---PI3K---> AKT         | -66,740741 |
| 189 TNF-alpha pathway           | 127 TNF-alpha pathway           | 1318,19124 |
| 61 IL-22 ---> STAT1alpha, S     | 219 IL-22 ---> STAT1alpha, S'   | -638,84753 |
| 62 IL-22 pathway                | 222 IL-22 pathway               | -638,84753 |
| 63 TNF-alpha ---> c-Jun         | 70 TNF-alpha ---> c-Jun         | -58,348706 |
| 64 IL-10 pathway                | 224 IL-10 pathway               | -638,84753 |
| 65 IL-10 ---> STAT1alpha, S     | 228 IL-10 ---> STAT1alpha, S'   | -638,84753 |
| 66 PRL ---> PAK1                | 72 PRL ---> PAK1                | -58,348706 |
| 206 EDAR pathway                | 133 EDAR pathway                | 1184,99266 |
| 67 cyclosome regulation         | 128 cyclosome regulation        | -156,3986  |
| 125 RANKL ---> AKT              | 134 RANKL ---> AKT              | -46,648781 |
| 229 G1 phase (Cdk2)             | 181 G1 phase (Cdk2)             | 294,122734 |
| 72 EDA-A2 ---> c-Jun            | 31 EDA-A2 ---> c-Jun            | 1115,26891 |
| 73 LAT ---> PKCtheta            | 32 LAT ---> PKCtheta            | 1115,26891 |
| 243 S phase (Cdk2)              | 218 S phase (Cdk2)              | 118,265946 |
| 32 EGF ---> SHIP1               | 35 EGF ---> SHIP1               | -43,190068 |
| 33 Cis ---/ PRLR                | 36 Cis ---/ PRLR                | -43,190068 |
| 34 VEGF-A ---> Ras              | 113 VEGF-A ---> Ras             | -467,00982 |
| 35 EGF ---> STAT3               | 37 EGF ---> STAT3               | -43,190068 |

|                                 |                                  |            |
|---------------------------------|----------------------------------|------------|
| 36 PKCdelta ---> GRK2           | 114 PKCdelta ---> GRK2           | -467,00982 |
| 37 SOCS-1 ---/ PRL              | 38 SOCS-1 ---/ PRL               | -43,190068 |
| 38 SOCS-3 ---/ EpoR             | 40 SOCS-3 ---/ EpoR              | -43,190068 |
| 39 SOCS-3 ---/ PRLR             | 41 SOCS-3 ---/ PRLR              | -43,190068 |
| 149 PPAR pathway                | 74 PPAR pathway                  | 483,62885  |
| 152 LAT ---> p50:RelA           | 178 LAT ---> p50:RelA            | -34,083034 |
| 153 LPS ---> JNK                | 179 LPS ---> JNK                 | -34,083034 |
| 95 PRL ---> Raf-1               | 108 PRL ---> Raf-1               | -42,042471 |
| 96 IL-4 - STAT6 pathway         | 245 IL-4 - STAT6 pathway         | -467,17975 |
| 97 IL-4 ---> STAT6              | 246 IL-4 ---> STAT6              | -467,17975 |
| 122 G-alpha-q ---> arachidonic  | 110 G-alpha-q ---> arachidonic   | 88,9832095 |
| 123 fMLP ---> superoxide        | 111 fMLP ---> superoxide         | 88,9832095 |
| 218 HIF-1alpha pathway          | 173 HIF-1alpha pathway           | 229,45259  |
| 50 SHP-2 ---> PRL               | 53 SHP-2 ---> PRL                | -31,202867 |
| 51 DLK ---> c-Jun               | 55 DLK ---> c-Jun                | -31,202867 |
| 52 beta-arrestin2 ---> c-Jun    | 56 beta-arrestin2 ---> c-Jun     | -31,202867 |
| 53 ASK1 ---MKK4---> JNK1        | 57 ASK1 ---MKK4---> JNK1         | -31,202867 |
| 54 ASK1 ---DUSP19---> c-Jun     | 58 ASK1 ---DUSP19---> c-Jun      | -31,202867 |
| 55 PRL ---Gab-2---> PI3K        | 59 PRL ---Gab-2---> PI3K         | -31,202867 |
| 56 PDGF B ---> PAK-1            | 60 PDGF B ---> PAK-1             | -31,202867 |
| 118 IFNalpha, IFNbeta ---> PI3K | 194 IFNalpha, IFNbeta ---> PI3K  | -280,5322  |
| 179 BCR ---> cytoskeletal reor  | 153 BCR ---> cytoskeletal reor   | 349,197495 |
| 207 OSM pathway                 | 199 OSM pathway                  | -107,59606 |
| 70 Epo ---> SHP-1               | 78 Epo ---> SHP-1                | -23,416846 |
| 71 PDGF A ---> Crk              | 80 PDGF A ---> Crk               | -23,416846 |
| 147 Plk1 activation and substr  | 251 Plk1 activation and substr   | -98,722829 |
| 148 Plk1 cell cycle regulation  | 252 Plk1 cell cycle regulation   | -98,722829 |
| 242 MHC class II ---> NF-AT     | 217 MHC class II ---> NF-AT      | 193,744143 |
| 230 BCR ---> NF-AT              | 230 BCR ---> NF-AT               | 41,3283903 |
| 231 p73 pathway                 | 105 p73 pathway                  | 349,159438 |
| 170 mTOR ----> S6, eIF-4E       | 249 mTOR ----> S6, eIF-4E        | -166,36108 |
| 91 JNK1 ---> MKK4               | 10 JNK1 ---> MKK4                | 17241,9952 |
| 92 insulin ---Jak1---> IRS-1, J | 103 insulin ---Jak1---> IRS-1, J | -18,115956 |
| 93 Src ---> Rap2B               | 104 Src ---> Rap2B               | -18,115956 |
| 195 insulin ---Shc---> MAPK c   | 196 insulin ---Shc---> MAPK c    | 37,9920143 |
| 169 Htt pathway                 | 156 Htt pathway                  | 441,663379 |
| 188 PRL ---Src,FAK1---> ERK     | 204 PRL ---Src,FAK1---> ERK      | -10,870115 |
| 112 PDGF B ---SHP-2---> Ras     | 124 PDGF B ---SHP-2---> Ras      | -14,3277   |
| 113 Epo ---> PIP3               | 125 Epo ---> PIP3                | -14,3277   |
| 114 IL-2 ---> STAT5             | 274 IL-2 ---> STAT5              | -234,88683 |
| 115 IL-2 - STAT5 pathway        | 275 IL-2 - STAT5 pathway         | -234,88683 |
| 116 PDGF B---/ Ras              | 126 PDGF B---/ Ras               | -14,3277   |
| 117 OSM ---> STAT1              | 276 OSM ---> STAT1               | -234,88683 |
| 234 OSM ---> ERK                | 183 OSM ---> ERK                 | -5,7769983 |
| 126 IFNalpha, IFNbeta ---> ST   | 223 IFNalpha, IFNbeta ---> ST    | -153,31255 |
| 127 Apaf-1 ---> Caspase-7       | 148 Apaf-1 ---> Caspase-7        | -13,834076 |
| 128 PDK1 ---> 4E-BP1, p70S6     | 225 PDK1 ---> 4E-BP1, p70S6      | -153,31255 |
| 129 Apaf-1 ---> Caspase-3       | 149 Apaf-1 ---> Caspase-3        | -13,834076 |

|                                |                                |            |
|--------------------------------|--------------------------------|------------|
| 130 Caspase-9 ---> Caspases    | 71 Caspase-9 ---> Caspases     | 427,186276 |
| 131 CD19 ---> PLCgamma2        | 150 CD19 ---> PLCgamma2        | -13,834076 |
| 132 Src ---/ RhoA              | 151 Src ---/ RhoA              | -13,834076 |
| 150 PRL ---Fyn---> PI3K        | 159 PRL ---Fyn---> PI3K        | -9,5485761 |
| 58 ErbB1 ---> endophilin 1     | 61 ErbB1 ---> endophilin 1     | -10,013025 |
| 59 MLK2 ---> JNK1              | 63 MLK2 ---> JNK1              | -10,013025 |
| 183 LAT ---> Ras               | 136 LAT ---> Ras               | 210,157009 |
| 184 LAT ---> MLC               | 137 LAT ---> MLC               | 210,157009 |
| 185 G2/M phase (cyclin A:Cdk   | 273 G2/M phase (cyclin A:Cdk   | -94,032168 |
| 186 LAT ---> cofilin           | 76 LAT ---> cofilin            | 800,441302 |
| 187 MHC class I ---> LAT       | 138 MHC class I ---> LAT       | 210,157009 |
| 203 IFNalpha, IFNbeta ---> ST  | 266 IFNalpha, IFNbeta ---> ST  | -74,648285 |
| 204 VEGF-A ---> NO             | 231 VEGF-A ---> NO             | -6,1271604 |
| 205 insulin ---IRS---> PRK2, S | 232 insulin ---IRS---> PRK2, S | -6,1271604 |
| 75 MEKK2 ---MKK7---> JNK       | 88 MEKK2 ---MKK7---> JNK       | -7,143528  |
| 77 MEKK2 ---> ATF-2            | 89 MEKK2 ---> ATF-2            | -7,143528  |
| 78 GCK ---> MKK4               | 90 GCK ---> MKK4               | -7,143528  |
| 79 PDGF A ---> SHP-2           | 91 PDGF A ---> SHP-2           | -7,143528  |
| 80 MKK4 ---> c-Jun             | 92 MKK4 ---> c-Jun             | -7,143528  |
| 81 PDGF B ---> PKR             | 93 PDGF B ---> PKR             | -7,143528  |
| 82 TAK1 ---> c-Jun             | 94 TAK1 ---> c-Jun             | -7,143528  |
| 83 Epo ---Lyn---> STAT5A       | 97 Epo ---Lyn---> STAT5A       | -7,143528  |
| 84 Caspase-6 ---> Caspase-3    | 191 Caspase-6 ---> Caspase-3   | -127,11285 |
| 85 MEKK2 ---> ATF-2            | 98 MEKK2 ---> ATF-2            | -7,143528  |
| 86 ASK1 ---> p38alpha          | 25 ASK1 ---> p38alpha          | 592,429418 |
| 247 VEGF-A ---> PLA2           | 193 VEGF-A ---> PLA2           | 47,5199502 |
| 219 VEGF-A ---/ Caspase-9, B   | 254 VEGF-A ---/ Caspase-9, B   | -53,476217 |
| 220 IL-12 - STAT4 pathway      | 255 IL-12 - STAT4 pathway      | -53,476217 |
| 221 IL-12 ---> STAT4           | 256 IL-12 ---> STAT4           | -53,476217 |
| 235 beta-catenin network       | 247 beta-catenin network       | -33,378572 |
| 240 PDGF A ---> ERK            | 261 PDGF A ---> ERK            | -2,2362971 |
| 241 PDGF B ---> ERK            | 263 PDGF B ---> ERK            | -2,2362971 |
| 252 BCR ---> ERK               | 264 BCR ---> ERK               | 13,7382247 |
| 253 TNF-alpha ---> NFkappaE    | 233 TNF-alpha ---> NFkappaB    | 111,306448 |
| 102 MKP-5 ---/ p53; MKK4 --    | 112 MKP-5 ---/ p53; MKK4 --    | -5,4243394 |
| 103 VEGF-A ---> STAT1alpha     | 209 VEGF-A ---> STAT1alpha     | -100,87536 |
| 104 PRL ---> Jak2              | 115 PRL ---> Jak2              | -5,4243394 |
| 105 PDGF B ---> Src            | 116 PDGF B ---> Src            | -5,4243394 |
| 106 LMW-PTP ---/ VEGFR-1       | 211 LMW-PTP ---/ VEGFR-1       | -100,87536 |
| 107 PDGF A ---> Src            | 117 PDGF A ---> Src            | -5,4243394 |
| 108 SHP-1 ---/ ErbB1           | 118 SHP-1 ---/ ErbB1           | -5,4243394 |
| 109 CD148 ---/ PDGFRbeta       | 119 CD148 ---/ PDGFRbeta       | -5,4243394 |
| 110 PRL ---Jak2---> STAT5A     | 120 PRL ---Jak2---> STAT5A     | -5,4243394 |
| 232 ZAP-70 ---> Elk-1          | 260 ZAP-70 ---> Elk-1          | 23,0740837 |

|                                |                                |            |
|--------------------------------|--------------------------------|------------|
| 233 AKT, MAPKAPK2 ---/ tul     | 262 AKT, MAPKAPK2 ---/ tul     | 23,0740837 |
| 133 Smac ---/ cIAP-2           | 52 Smac ---/ cIAP-2            | 308,225719 |
| 134 PRL ---Src--> STAT5B       | 140 PRL ---Src--> STAT5B       | -4,1807165 |
| 135 Smac ---> Caspase-3        | 141 Smac ---> Caspase-3        | -4,1807165 |
| 136 PTEN ---/ AKT-1            | 142 PTEN ---/ AKT-1            | -4,1807165 |
| 138 Epo ---> STAT5             | 144 Epo ---> STAT5             | -4,1807165 |
| 139 Smac ---/ cIAP-1           | 54 Smac ---/ cIAP-1            | 308,225719 |
| 140 EDAR ---> TRAF2            | 146 EDAR ---> TRAF2            | -4,1807165 |
| 163 PDGF B ---> STATs          | 174 PDGF B ---> STATs          | -3,2640064 |
| 164 JNK1 ---> Bax              | 175 JNK1 ---> Bax              | -3,2640064 |
| 165 Nod1 ---> Caspase-9        | 83 Nod1 ---> Caspase-9         | 240,66004  |
| 166 JLP ---> JNK1              | 84 JLP ---> JNK1               | 240,66004  |
| 181 SLP-65 ---/ Raf-1          | 198 SLP-65 ---/ Raf-1          | -2,0822685 |
| 182 c-Kit pathway              | 277 c-Kit pathway              | -56,971622 |
| 197 Fer ---> beta-catenin{ Tyr | 220 Fer ---> beta-catenin{ Tyr | -1,610585  |
| 198 PDGF A ---> AKT-1          | 221 PDGF A ---> AKT-1          | -1,610585  |
| 200 PDGF B ---> AKT-1          | 226 PDGF B ---> AKT-1          | -1,610585  |
| 201 CHIP ---/ Pael-R           | 229 CHIP ---/ Pael-R           | -1,610585  |
| 226 EGF ---> DAG, IP3          | 241 EGF ---> DAG, IP3          | -1,1965244 |
| 227 Src ---> Rac1              | 242 Src ---> Rac1              | -1,1965244 |
| 228 Rac1 ---> c-Jun, Elk-1     | 243 Rac1 ---> c-Jun, Elk-1     | -1,1965244 |
| 236 Csk, CD45 ---> Lck         | 250 Csk, CD45 ---> Lck         | -0,819511  |
| 244 Csk, CD45 ---> Fyn         | 265 Csk, CD45 ---> Fyn         | -0,6059081 |
| 209 PDGF A ---> DAG, IP3       | 201 PDGF A ---> DAG, IP3       | 7,93705004 |
| 212 PDGF B --> DAG, IP3        | 202 PDGF B --> DAG, IP3        | 7,93705004 |
| 213 PI3K ---/ p53              | 203 PI3K ---/ p53              | 7,93705004 |
| 44 Trx ---/ ASK1               | 44 Trx ---/ ASK1               | -1,9722661 |
| 245 activin A ---> Smad2       | 157 activin A ---> Smad2       | 158,943465 |
| 246 activin A ---> Smad3       | 158 activin A ---> Smad3       | 158,943465 |
| 121 MKK6 ---> Hsp27            | 131 MKK6 ---> Hsp27            | -0,8554941 |
| 154 MEK-1 ---> HIF-1alpha      | 160 MEK-1 ---> HIF-1alpha      | -1,0156611 |
| 155 p38alpha ---> CREB         | 162 p38alpha ---> CREB         | -1,0156611 |
| 156 MKK4 ---/ RXR-alpha        | 165 MKK4 ---/ RXR-alpha        | -1,0156611 |
| 157 MLK2 ---MKK3--> p38a       | 66 MLK2 ---MKK3--> p38a        | 155,462079 |
| 159 MLK2 ---MKK6--> p38a       | 67 MLK2 ---MKK6--> p38a        | 155,462079 |
| 160 TAK1 ---> p38alpha         | 68 TAK1 ---> p38alpha          | 155,462079 |
| 161 MEKK4 ---> JNK1            | 171 MEKK4 ---> JNK1            | -1,0156611 |
| 255 FasL ---> Caspase-3        | 26 FasL ---> Caspase-3         | 2156,93754 |
| 256 Caspase-3 ---/ p53         | 267 Caspase-3 ---/ p53         | 3,07549309 |
| 257 IL-8 ---> ERK2             | 268 IL-8 ---> ERK2             | 3,07549309 |
| 258 EGF ---> PLD2              | 227 EGF ---> PLD2              | 47,4366683 |
| 260 Eps15 ---> ErbB internaliz | 269 Eps15 ---> ErbB internaliz | 3,07549309 |
| 171 MEKK3 ---> ATF-2           | 87 MEKK3 ---> ATF-2            | 119,539797 |
| 172 MKK7 ---> c-Jun            | 186 MKK7 ---> c-Jun            | -0,4295201 |

|                              |                             |            |
|------------------------------|-----------------------------|------------|
| 173 p38alpha ---> STAT3      | 95 p38alpha ---> STAT3      | 119,539797 |
| 174 JNK2 ---> doublecortin   | 96 JNK2 ---> doublecortin   | 119,539797 |
| 175 PP2Calpha ---/ MKK4      | 189 PP2Calpha ---/ MKK4     | -0,4295201 |
| 176 PP2Calpha ---/ MKK6      | 190 PP2Calpha ---/ MKK6     | -0,4295201 |
| 190 EGF ---> N-WASP          | 210 EGF ---> N-WASP         | -0,2663709 |
| 191 Fas ---/ SRF             | 212 Fas ---/ SRF            | -0,2663709 |
| 192 Fas ---/ NuMA            | 213 Fas ---/ NuMA           | -0,2663709 |
| 193 Unc18-1 ---/ PLD2        | 121 Unc18-1 ---/ PLD2       | 95,1846532 |
| 194 Rac1 ---> p38            | 215 Rac1 ---> p38           | -0,2663709 |
| 222 E1 ---/ cyclin E         | 236 E1 ---/ cyclin E        | -0,1172821 |
| 223 Rac1 ---> golgin-160     | 237 Rac1 ---> golgin-160    | -0,1172821 |
| 224 MKK4 ---/ PPAR-gamma     | 238 MKK4 ---/ PPAR-gamma    | -0,1172821 |
| 225 PDGF B ---> cortactin    | 239 PDGF B ---> cortactin   | -0,1172821 |
| 248 Rac1 ---MLK3---> c-Jun   | 270 Rac1 ---MLK3---> c-Jun  | 0,09568169 |
| 249 HB-EGF ---> PI3K         | 271 HB-EGF ---> PI3K        | 0,09568169 |
| 239 POSH ---> JNK1, JNK2     | 257 POSH ---> JNK1, JNK2    | -0,0281322 |
| 262 Apo2L ---Caspase-8---> C | 48 Apo2L ---Caspase-8---> C | 776,568022 |
|                              |                             | 126115,662 |

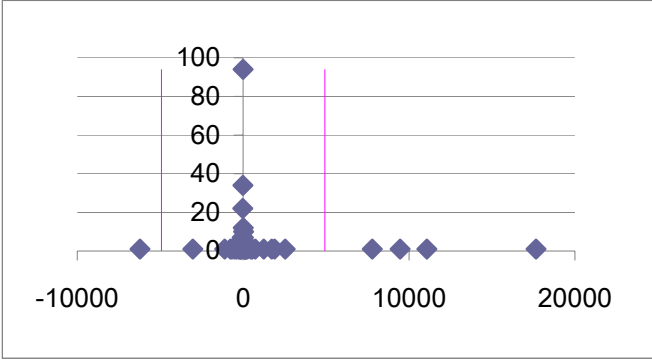



**Low vs control 1 table 15**

| Control Rank | Pathway name                     | Sample Rank | Pathway name                     | Delta Score |
|--------------|----------------------------------|-------------|----------------------------------|-------------|
| 1            | stress-associated pathways       | 1           | stress-associated pathways       | -7676094,7  |
| 2            | Epo pathway                      | 3           | Epo pathway                      | -937979,59  |
| 5            | JNK pathway                      | 4           | JNK pathway                      | -321067,55  |
| 7            | EGF pathway                      | 7           | EGF pathway                      | -430160,82  |
| 6            | PRL pathway                      | 8           | PRL pathway                      | -664745,47  |
| 3            | RANKL pathway                    | 6           | RANKL pathway                    | -258627,31  |
| 33           | insulin pathway                  | 60          | insulin pathway                  | -25157,486  |
| 9            | Epo ---> ERK1                    | 11          | Epo ---> ERK1                    | -13398,042  |
| 34           | PDGF pathway                     | 42          | PDGF pathway                     | -7207,7371  |
| 57           | B-cell antigen receptor pathway  | 111         | B-cell antigen receptor pathway  | -14179,736  |
| 8            | BMP2 ---> p38alpha               | 9           | BMP2 ---> p38alpha               | -11492,62   |
| 88           | T-cell antigen receptor pathway  | 94          | T-cell antigen receptor pathway  | -3410,1091  |
| 12           | IFNgamma ---> STAT1alpha         | 2           | IFNgamma ---> STAT1alpha         | 81524,3241  |
| 22           | alpha Iib beta3 pathway          | 40          | alpha Iib beta3 pathway          | -9787,1438  |
| 23           | alpha Iib beta3 ---> Rac1        | 41          | alpha Iib beta3 ---> Rac1        | -9787,1438  |
| 4            | EGF ---> PAK1                    | 5           | EGF ---> PAK1                    | -7828,1786  |
| 56           | Fas pathway                      | 68          | Fas pathway                      | -4664,7848  |
| 16           | EGF ---> ERK                     | 19          | EGF ---> ERK                     | -7512,1749  |
| 55           | IL-1 pathway                     | 99          | IL-1 pathway                     | -7683,7192  |
| 13           | ZAP-70 ---> c-Jun                | 15          | ZAP-70 ---> c-Jun                | -5709,7202  |
| 42           | p38 pathway                      | 74          | p38 pathway                      | -6241,4128  |
| 11           | TAK1 ---> ATF-2                  | 12          | TAK1 ---> ATF-2                  | -4544,9957  |
| 21           | IL-1beta ---> c-Jun              | 28          | IL-1beta ---> c-Jun              | -4581,3724  |
| 17           | RANKL ---> MITF                  | 20          | RANKL ---> MITF                  | -4249,7591  |
| 14           | RANKL ---> JNK1                  | 17          | RANKL ---> JNK1                  | -3210,4538  |
| 15           | EGF ---> PI3K-C2beta             | 16          | EGF ---> PI3K-C2beta             | -3210,4538  |
| 65           | IFN pathway                      | 18          | IFN pathway                      | 19620,4253  |
| 19           | Epo ---> IP3, PtsIns(3,4)P       | 27          | Epo ---> IP3, PtsIns(3,4)P       | -3245,9518  |
| 189          | Caspase network                  | 208         | Caspase network                  | -448,28074  |
| 10           | c-Cbl ---/ ErBB1                 | 10          | c-Cbl ---/ ErBB1                 | -2544,6952  |
| 135          | TLR4 pathway                     | 87          | TLR4 pathway                     | 4707,39832  |
| 110          | TLR3 pathway                     | 26          | TLR3 pathway                     | 21621,6116  |
| 18           | EGF ---> c-Fos                   | 22          | EGF ---> c-Fos                   | -2287,5835  |
| 89           | Apo2L pathway                    | 142         | Apo2L pathway                    | -2408,4872  |
| 170          | E2F network                      | 100         | E2F network                      | 4309,2346   |
| 111          | IL-1beta ---> p50:RelA           | 151         | IL-1beta ---> p50:RelA           | -1946,5118  |
| 54           | neurotensin pathway              | 47          | neurotensin pathway              | 470,803888  |
| 63           | BCR ---> c-Jun                   | 89          | BCR ---> c-Jun                   | -1475,9317  |
| 64           | IL-1beta ---> Elk-1              | 90          | IL-1beta ---> Elk-1              | -1475,9317  |
| 87           | G2/M phase (cyclin B:Cdk2)       | 124         | G2/M phase (cyclin B:Cdk2)       | -1484,7253  |
| 43           | RhoA ---> stress fiber formation | 48          | RhoA ---> stress fiber formation | 79,7031455  |
| 44           | RhoA pathway                     | 49          | RhoA pathway                     | 79,7031455  |
| 80           | IFNalpha, IFNbeta, IFNgamma      | 13          | IFNalpha, IFNbeta, IFNgamma      | 17032,6069  |
| 209          | p53 pathway                      | 178         | p53 pathway                      | 1383,79166  |
| 91           | IL-8 pathway                     | 43          | IL-8 pathway                     | 2404,12436  |
| 53           | fMLP pathway                     | 57          | fMLP pathway                     | 57,2213329  |

|                                 |                    |            |
|---------------------------------|--------------------|------------|
| 32 wnt pathway                  | 14 wnt pathway     | 2219,2154  |
| 24 JIP-1 ---> APP               | 31 JIP-1 ---> AI   | -861,54428 |
| 84 BCR ---> p38                 | 101 BCR ---> p38   | -813,22692 |
| 145 LPS ---> NF-kappaB          | 180 LPS ---> NF-   | -699,49207 |
| 129 Rac1 pathway                | 167 Rac1 pathwa    | -674,02007 |
| 35 PRL ---IRS---> PI3K          | 46 PRL ---IRS--    | -638,9838  |
| 212 TGFbeta pathway             | 196 TGFbeta patl   | 300,640415 |
| 107 LPS ---> p38                | 143 LPS ---> p38   | -622,08226 |
| 108 insulin ---> glucose uptake | 145 insulin ---> g | -622,08226 |
| 109 BCR ---MLK3---> c-Jun       | 144 BCR ---MLK     | -622,08226 |
| 168 tuberin pathway             | 214 tuberin pathv  | -537,6783  |
| 79 PRL ---PI3K---> AKT          | 98 PRL ---PI3K     | -593,95904 |
| 20 EGF ---> STAT1alpha          | 23 EGF ---> ST.    | -536,64953 |
| 86 parkin associated pathway    | 88 parkin associ   | 20,6686123 |
| 45 IL-22 ---> STAT1alpha, S     | 61 IL-22 ---> S1   | -500,36958 |
| 46 IL-22 pathway                | 62 IL-22 pathwa    | -500,36958 |
| 47 TNF-alpha ---> c-Jun         | 63 TNF-alpha --    | -500,36958 |
| 48 IL-10 ---> STAT1alpha, S     | 65 IL-10 ---> S1   | -500,36958 |
| 49 IL-10 pathway                | 64 IL-10 pathwa    | -500,36958 |
| 50 PRL ---> PAK1                | 66 PRL ---> PA     | -500,36958 |
| 196 VEGF-A pathway              | 202 VEGF-A pat     | -23,057567 |
| 160 EDAR pathway                | 206 EDAR pathw     | -424,02414 |
| 104 RANKL ---> AKT              | 125 RANKL --->     | -423,04912 |
| 62 EDA-A2 ---> c-Jun            | 72 EDA-A2 --->     | -402,30142 |
| 25 EGF ---> SHIP1               | 32 EGF ---> SH     | -372,8499  |
| 26 Cis ---/ PRLR                | 33 Cis ---/ PRLI   | -372,8499  |
| 27 VEGF-A ---> Ras              | 34 VEGF-A --->     | -372,8499  |
| 28 EGF ---> STAT3               | 35 EGF ---> ST.    | -372,8499  |
| 29 SOCS-3 ---/ EpoR             | 38 SOCS-3 ---/.    | -372,8499  |
| 30 SOCS-1 ---/ PRL              | 37 SOCS-1 ---/.    | -372,8499  |
| 31 SOCS-3 ---/ PRLR             | 39 SOCS-3 ---/.    | -372,8499  |
| 66 Aurora-A cell cycle regula   | 29 Aurora-A cel    | 654,562351 |
| 67 Aurora-A activation, subst   | 30 Aurora-A act    | 654,562351 |
| 68 PPAR pathway                 | 149 PPAR pathw     | -339,00735 |
| 203 S phase (Cdk2)              | 243 S phase (Cdk   | -287,03886 |
| 206 insulin ---> AKT-1 pathwa   | 215 insulin ---> A | 27,7599446 |
| 81 PRL ---> Raf-1               | 95 PRL ---> Raf    | -330,7043  |
| 127 LPS ---> JNK                | 153 LPS ---> JNK   | -327,32379 |
| 128 LAT ---> p50:RelA           | 152 LAT ---> p50   | -327,32379 |
| 90 dsRNA ---> c-Jun             | 21 dsRNA ---> c    | 3370,22696 |
| 36 DLK ---> c-Jun               | 51 DLK ---> c-J    | -280,63942 |
| 37 beta-arrestin2 ---> c-Jun    | 52 beta-arrestin.  | -280,63942 |

|                                 |                                     |
|---------------------------------|-------------------------------------|
| 38 ASK1 ---DUSP19---> c-Jun     | 54 ASK1 ---DU -280,63942            |
| 39 PRL ---Gab-2---> PI3K        | 55 PRL ---Gab-2---> PI3K -280,63942 |
| 40 PDGF B ---> PAK-1            | 56 PDGF B ---> PAK-1 -280,63942     |
| 41 SHP-2 ---> PRL               | 50 SHP-2 ---> PRL -280,63942        |
| 85 cyclosome regulatory network | 45 cyclosome re -431,870017         |
| 147 BCR ---> cytoskeletal reor  | 179 BCR ---> cyto -234,92306        |
| 150 HIF-1alpha pathway          | 218 HIF-1alpha p -108,01139         |
| 58 GH pathway                   | 24 GH pathway 923,902417            |
| 59 PDGF A ---> Crk              | 71 PDGF A ---> Crk -211,96757       |
| 60 GH ---> Grb-2                | 25 GH ---> Grb-2 923,902417         |
| 61 Epo ---> SHP-1               | 70 Epo ---> SHP-1 -211,96757        |
| 169 OSM pathway                 | 207 OSM pathwa -187,41846           |
| 229 G1 phase (Cdk2)             | 229 G1 phase (Ck 76,3767772         |
| 105 G-alpha-q ---> arachidonic  | 122 G-alpha-q --- -13,776248        |
| 106 fMLP ---> superoxide        | 123 fMLP ---> su -13,776248         |
| 82 Src ---> Rap2B               | 93 Src ---> Rap2 -169,51428         |
| 83 insulin ---Jak1---> IRS-1, p | 92 insulin ---Jak -169,51428        |
| 144 mTOR ----> S6, eIF-4E       | 170 mTOR ----> S6 -157,18199        |
| 112 cyclosome regulation        | 67 cyclosome re 228,621722          |
| 148 dsRNA ---> IKK-alpha:IK     | 69 dsRNA ---> IK 1135,41289         |
| 230 TNF-alpha pathway           | 189 TNF-alpha p 351,471944          |
| 102 Epo ---> PIP3               | 113 Epo ---> PIP3 -139,44007        |
| 103 OSM ---> STAT1              | 117 OSM ---> STAT1 -139,44007       |
| 159 PRL ---Src,FAK1---> ERK     | 188 PRL ---Src,F -129,65625         |
| 113 Caspase-9 ----> Caspases    | 130 Caspase-9 --- -117,34786        |
| 114 Apaf-1 ---> Caspase-7       | 127 Apaf-1 ---> C -117,34786        |
| 115 CD19 ----> PLCgamma2        | 131 CD19 ---> PLC -117,34786        |
| 116 PDK1 ---> 4E-BP1, p70S6     | 128 PDK1 ---> 4E -117,34786         |
| 117 Apaf-1 ---> Caspase-3       | 129 Apaf-1 ---> C -117,34786        |
| 193 dsRNA ----> p50:RelA        | 120 dsRNA ---> p 626,776833         |
| 194 OSM ---> ERK                | 234 OSM ---> ERK -95,564343         |
| 130 PRL ---Fyn---> PI3K         | 150 PRL ---Fyn--- -103,2628         |
| 205 p73 pathway                 | 231 p73 pathway 15,5522883          |
| 51 ErbB1 ---> endophilin 1      | 58 ErbB1 ---> end -98,167357        |
| 52 MLK2 ---> JNK1               | 59 MLK2 ---> JNK -98,167357         |
| 173 Plk1 activation and substr  | 147 Plk1 activatio 96,0216415       |
| 174 Plk1 cell cycle regulation  | 148 Plk1 cell cyc 96,0216415        |
| 235 MHC class II ---> NF-AT     | 242 MHC class II 66,6732071         |
| 236 BCR ---> NF-AT              | 230 BCR ---> NF 53,6013383          |
| 149 IFNalpha, IFNbeta ---> PI   | 118 IFNalpha, IF 206,842176         |
| 164 G2/M phase (cyclin A:Cdk    | 185 G2/M phase -69,325076           |
| 165 LAT ---> MLC                | 184 LAT ---> MLC -69,325076         |
| 166 LAT ---> cofilin            | 186 LAT ---> cofil -69,325076       |
| 167 MHC class I ---> LAT        | 187 MHC class I -69,325076          |
| 69 TAK1 ---> c-Jun              | 82 TAK1 ---> c-Jun -73,982961       |
| 70 MEKK2 ---MKK7---> JNK        | 75 MEKK2 ---MKK -73,982961          |
| 71 MEKK2 ---> ATF-2             | 77 MEKK2 ---> ATF -73,982961        |
| 72 Epo ---Lyn---> STAT5A        | 83 Epo ---Lyn--- -73,982961         |

|                                |                               |
|--------------------------------|-------------------------------|
| 73 MEKK2 ---> ATF-2            | 85 MEKK2 ---> -73,982961      |
| 74 GCK ---> MKK4               | 78 GCK ---> M: -73,982961     |
| 75 PDGF A ---> SHP-2           | 79 PDGF A ---> -73,982961     |
| 76 MKK4 ---> c-Jun             | 80 MKK4 ---> c -73,982961     |
| 77 PDGF B ---> PKR             | 81 PDGF B ---> -73,982961     |
| 78 ASK1 ---> p38alpha          | 86 ASK1 ---> p: -73,982961    |
| 219 insulin ---Shc---> MAPK c  | 195 insulin ---Shc 53,1387324 |
| 171 insulin ---IRS---> PRK2, S | 205 insulin ---IR: -62,470105 |
| 172 VEGF-A ---> NO             | 204 VEGF-A ---> -62,470105    |
| 195 Htt pathway                | 169 Htt pathway 63,2113627    |
| 187 VEGF-A ---/ Caspase-9, B   | 219 VEGF-A ---/ -58,750655    |
| 92 MKP-5 ---/ p53; MKK4 --     | 102 MKP-5 ---/ p -60,724239   |
| 93 PDGF B ---> Src             | 105 PDGF B ---> -60,724239    |
| 94 LMW-PTP ---/ VEGFR-1        | 106 LMW-PTP -- -60,724239     |
| 95 PDGF A ---> Src             | 107 PDGF A ---> -60,724239    |
| 96 SHP-1 ---/ ErbB1            | 108 SHP-1 ---/ E: -60,724239  |
| 97 CD148 ---/ PDGFRbeta        | 109 CD148 ---/ P -60,724239   |
| 98 PRL ---Jak2---> STAT5A      | 110 PRL ---Jak2- -60,724239   |
| 99 PKCdelta ---> GRK2          | 36 PKCdelta --- 418,401495    |
| 100 VEGF-A ---> STAT1alpha     | 103 VEGF-A ---> -60,724239    |
| 101 PRL ---> Jak2              | 104 PRL ---> Jak -60,724239   |
| 207 PDGF A ---> ERK            | 240 PDGF A ---> -48,266372    |
| 208 PDGF B ---> ERK            | 241 PDGF B ---> -48,266372    |
| 215 BCR ---> ERK               | 252 BCR ---> ER -41,877796    |
| 119 EDAR ---> TRAF2            | 140 EDAR ---> T -48,685582    |
| 120 Smac ---/ cIAP-2           | 133 Smac ---/ cI: -48,685582  |
| 121 PRL ---Src---> STAT5B      | 134 PRL ---Src--- -48,685582  |
| 122 ASK1 ---MKK4---> JNK1      | 53 ASK1 ---MK 303,64129       |
| 123 Smac ---> Caspase-3        | 135 Smac ---> C: -48,685582   |
| 124 PTEN ---/ AKT-1            | 136 PTEN ---/ A: -48,685582   |
| 125 Epo ---> STAT5             | 138 Epo ---> ST: -48,685582   |
| 126 Smac ---/ cIAP-1           | 139 Smac ---/ cI: -48,685582  |
| 213 VEGF-A ---> PLA2           | 247 VEGF-A ---> 7,56272533    |
| 131 Nod1 ---> Caspase-9        | 165 Nod1 ---> C: -41,446066   |
| 132 JLP ---> JNK1              | 166 JLP ---> JNK -41,446066   |
| 133 PDGF B ---> STATs          | 163 PDGF B ---> -41,446066    |
| 134 JNK1 ---> Bax              | 164 JNK1 ---> B: -41,446066   |
| 220 TNF-alpha ---> NFkappaE    | 253 TNF-alpha -- 7,80304799   |
| 175 TBK1:TRIF:IKK-i ---> p5    | 216 TBK1:TRIF: 5,04204197     |
| 146 JNK1 ---> MKK4             | 91 JNK1 ---> M 185,009376     |
| 161 PDGF B ---SHP-2---> Ras    | 112 PDGF B ---S 151,605852    |
| 162 SLP-65 ---/ Raf-1          | 181 SLP-65 ---/ F -33,07013   |
| 163 PDGF B---/ Ras             | 116 PDGF B---/ 1 151,605852   |
| 188 VEGF-A ---> NF-ATc         | 168 VEGF-A ---> 28,6973885    |

|                               |                    |            |
|-------------------------------|--------------------|------------|
| 176 Fer ---> beta-cateninp{Ty | 197 Fer ---> beta- | -28,869757 |
| 177 PDGF A ---> AKT-1         | 198 PDGF A --->    | -28,869757 |
| 178 IFNalpha, IFNbeta ---> ST | 126 IFNalpha, IF   | 128,596884 |
| 179 OSM ---> STAT3            | 199 OSM ---> ST    | -28,869757 |
| 180 PDGF B ---> AKT-1         | 200 PDGF B --->    | -28,869757 |
| 181 Src ---/ RhoA             | 132 Src ---/ RhoA  | 128,596884 |
| 190 Src ---> Rac1             | 227 Src ---> Rac1  | -26,246512 |
| 191 Rac1 ---> c-Jun, Elk-1    | 228 Rac1 ---> c-J  | -26,246512 |
| 192 LAT ---> PKCtheta         | 73 LAT ---> PK     | 519,433446 |
| 233 ZAP-70 ---> Elk-1         | 232 ZAP-70 --->    | 15,4437971 |
| 234 AKT, MAPKAPK2 ---/ tu     | 233 AKT, MAPK      | 15,4437971 |
| 204 Csk, CD45 ---> Lck        | 236 Csk, CD45 --   | -24,068509 |
| 211 Csk, CD45 ---> Fyn        | 244 Csk, CD45 --   | -23,149229 |
| 214 LAT ---> Ras              | 183 LAT ---> Ra    | 74,8558722 |
| 224 IFNalpha, IFNbeta ---> ST | 203 IFNalpha, IF   | 69,0783454 |
| 231 IL-12 - STAT4 pathway     | 220 IL-12 - STA    | 61,7623103 |
| 232 IL-12 ---> STAT4          | 221 IL-12 ---> S   | 61,7623103 |
| 246 beta-catenin network      | 235 beta-catenin   | 57,6195628 |
| 221 PDGF A ---> DAG, IP3      | 209 PDGF A --->    | 9,47110645 |
| 222 PDGF B --> DAG, IP3       | 212 PDGF B -->     | 9,47110645 |
| 223 PI3K ---/ p53             | 213 PI3K ---/ p5   | 9,47110645 |
| 118 MKK6 ---> Hsp27           | 121 MKK6 ---> I    | -14,146139 |
| 136 MEK-1 ---> HIF-1alpha     | 154 MEK-1 --->     | -11,966331 |
| 137 p38alpha ---> CREB        | 155 p38alpha --->  | -11,966331 |
| 138 MLK2 ---MKK6---> p38a     | 159 MLK2 ---MF     | -11,966331 |
| 139 MKK4 ---/ RXR-alpha       | 156 MKK4 ---/ R    | -11,966331 |
| 140 TAK1 ---> p38alpha        | 160 TAK1 ---> p    | -11,966331 |
| 141 MEKK4 ---> JNK1           | 161 MEKK4 --->     | -11,966331 |
| 142 MLK2 ---MKK3---> p38a     | 157 MLK2 ---MF     | -11,966331 |
| 143 ATM ---> p53              | 162 ATM ---> p5    | -11,966331 |
| 237 IL-4 ---> STAT6           | 97 IL-4 ---> ST    | 494,973343 |
| 238 phosphorylation and ubiqu | 238 phosphorylat   | 4,87565063 |
| 239 IL-4 - STAT6 pathway      | 96 IL-4 - STAT     | 494,973343 |
| 151 MEKK3 ---> ATF-2          | 171 MEKK3 --->     | -10,564244 |
| 152 p38alpha ---> STAT3       | 173 p38alpha --->  | -10,564244 |
| 153 JNK2 ---> doublecortin    | 174 JNK2 ---> dc   | -10,564244 |
| 154 Abl ---> p73alpha         | 76 Abl ---> p73:   | 120,933048 |
| 155 MKK7 ---> c-Jun           | 172 MKK7 ---> c    | -10,564244 |
| 156 PP2Calpha ---/ MKK4       | 175 PP2Calpha --   | -10,564244 |
| 157 PP2Calpha ---/ MKK6       | 176 PP2Calpha --   | -10,564244 |
| 158 Caspase-6 ---> Caspase-3  | 84 Caspase-6 ---   | 120,933048 |
| 182 Fas ---/ SRF              | 191 Fas ---/ SRF   | -9,5268572 |
| 183 Fas ---/ NuMA             | 192 Fas ---/ NuM   | -9,5268572 |
| 184 Unc18-1 ---/ PLD2         | 193 Unc18-1 ---/   | -9,5268572 |

|                                |                               |
|--------------------------------|-------------------------------|
| 185 EGF ---> N-WASP            | 190 EGF ---> N-1 -9,5268572   |
| 186 Rac1 ---> p38              | 194 Rac1 ---> p3 -9,5268572   |
| 197 E1 ---/ cyclin E           | 222 E1 ---/ cyclin -8,7355419 |
| 198 Rac1 ---> golgin-160       | 223 Rac1 ---> go -8,7355419   |
| 199 MKK4 ---/ PPAR-gamma       | 224 MKK4 ---/ P -8,7355419    |
| 200 TPO ---> STAT3             | 141 TPO ---> ST. 78,5816708   |
| 201 TPO pathway                | 137 TPO pathwa: 78,5816708    |
| 202 PDGF B ---> cortactin      | 225 PDGF B ---> -8,7355419    |
| 210 POSH ---> JNK1, JNK2       | 239 POSH ---> JI -8,5299793   |
| 247 activin A ---> Smad2       | 245 activin A ---> 3,3205128  |
| 248 activin A ---> Smad3       | 246 activin A ---> 3,3205128  |
| 249 EGF ---> DAG, IP3          | 226 EGF ---> DA 43,7877239    |
| 240 EGF ---> PLD2              | 258 EGF ---> PL -3,5193563    |
| 241 Eps15 ---> ErbB internaliz | 260 Eps15 ---> E -3,5193563   |
| 242 Fam ---> beta-catenin      | 254 Fam ---> bet: -3,5193563  |
| 243 FasL ---> Caspase-3        | 255 FasL ---> Ca -3,5193563   |
| 244 CHIP ---/ Pael-R           | 201 CHIP ---/ Pa: 47,3916925  |
| 245 IL-8 ---> ERK2             | 257 IL-8 ---> ER -3,5193563   |
| 216 Rac1 ---MLK3---> c-Jun     | 248 Rac1 ---MLK -7,6994168    |
| 217 CXCR1 internalization via  | 251 CXCR1 inter -7,6994168    |
| 218 HB-EGF ---> PI3K           | 249 HB-EGF ---> -7,6994168    |
| 225 Apo2L ---Caspase-8---> C   | 262 Apo2L ---Ca -9,434769     |
| 226 IL-2 ---> STAT5            | 114 IL-2 ---> ST. 236,871113  |
| 227 c-Kit pathway              | 182 c-Kit pathwa 52,1951315   |
| 228 IL-2 - STAT5 pathway       | 115 IL-2 - STAT. 236,871113   |

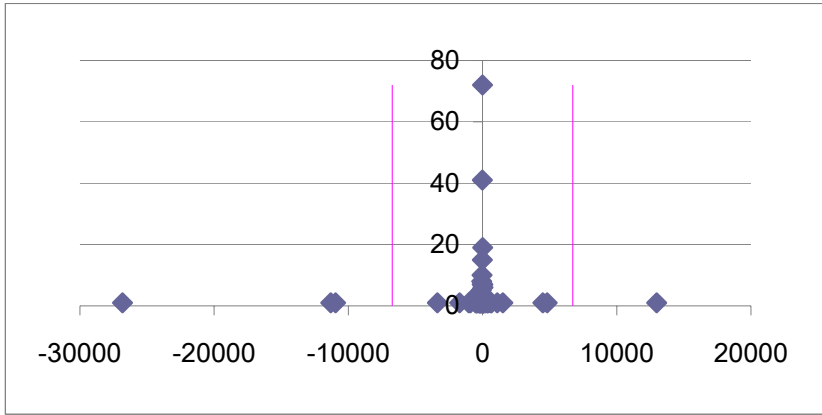

**Low vs control 2 table 16**

| Control Rank | Pathway name                  | Sample Rank | Pathway name              | Delta Score |
|--------------|-------------------------------|-------------|---------------------------|-------------|
| 1            | stress-associated pathways    | 1           | stress-associated pathwa  | -18463122   |
| 3            | EGF pathway                   | 7           | EGF pathway               | -1240074,5  |
| 9            | JNK pathway                   | 4           | JNK pathway               | 312366,741  |
| 5            | Fas pathway                   | 68          | Fas pathway               | -470668,95  |
| 2            | p38 pathway                   | 74          | p38 pathway               | -413551,56  |
| 7            | Epo pathway                   | 3           | Epo pathway               | 80766,4479  |
| 4            | RANKL pathway                 | 6           | RANKL pathway             | -99672,158  |
| 13           | PRL pathway                   | 8           | PRL pathway               | 50590,5866  |
| 28           | Caspase network               | 208         | Caspase network           | -79775,587  |
| 6            | BMP2 ---> p38alpha            | 9           | BMP2 ---> p38alpha        | -24984,741  |
| 22           | Apo2L pathway                 | 142         | Apo2L pathway             | -24911,919  |
| 98           | T-cell antigen receptor pathw | 94          | T-cell antigen receptor p | -3073,3571  |
| 43           | TGFbeta pathway               | 196         | TGFbeta pathway           | -18401,893  |
| 10           | JNK1 ---> MKK4                | 91          | JNK1 ---> MKK4            | -17923,54   |
| 11           | TAK1 ---> ATF-2               | 12          | TAK1 ---> ATF-2           | -13504,18   |
| 17           | IL-8 pathway                  | 43          | IL-8 pathway              | -8010,2188  |
| 105          | insulin pathway               | 60          | insulin pathway           | 13067,6662  |
| 12           | RANKL ---> MITF               | 20          | RANKL ---> MITF           | -7780,4115  |
| 101          | B-cell antigen receptor pathw | 111         | B-cell antigen receptor p | -2396,2436  |
| 16           | Epo ---> ERK1                 | 11          | Epo ---> ERK1             | 1632,14209  |
| 8            | EGF ---> PAK1                 | 5           | EGF ---> PAK1             | 1007,5612   |
| 97           | PDGF pathway                  | 42          | PDGF pathway              | 8933,244    |
| 18           | IFNgamma ---> STAT1alpha      | 2           | IFNgamma ---> STAT1a      | 92648,7759  |
| 154          | E2F network                   | 100         | E2F network               | 2517,71157  |
| 15           | wnt pathway                   | 14          | wnt pathway               | -1418,3267  |
| 41           | alpha Iib beta3 pathway       | 40          | alpha Iib beta3 pathway   | 1123,22356  |
| 42           | alpha Iib beta3 ---> Rac1     | 41          | alpha Iib beta3 ---> Rac1 | 1123,22356  |
| 23           | EGF ---> ERK                  | 19          | EGF ---> ERK              | 917,016777  |
| 121          | IL-1 pathway                  | 99          | IL-1 pathway              | 829,357405  |
| 19           | ZAP-70 ---> c-Jun             | 15          | ZAP-70 ---> c-Jun         | 710,938606  |
| 31           | IL-1beta ---> c-Jun           | 28          | IL-1beta ---> c-Jun       | 598,498705  |
| 130          | TLR3 pathway                  | 26          | TLR3 pathway              | 22994,1472  |
| 72           | neurotensin pathway           | 47          | neurotensin pathway       | 1047,18339  |
| 40           | fMLP pathway                  | 57          | fMLP pathway              | -719,60132  |
| 46           | IL-1beta ---> Elk-1           | 90          | IL-1beta ---> Elk-1       | -1603,4944  |
| 20           | EGF ---> PI3K-C2beta          | 16          | EGF ---> PI3K-C2beta      | 397,608782  |
| 21           | RANKL ---> JNK1               | 17          | RANKL ---> JNK1           | 397,608782  |
| 204          | p53 pathway                   | 178         | p53 pathway               | 1205,13617  |
| 29           | Epo ---> IP3, PtsIns(3,4)P    | 27          | Epo ---> IP3, PtsIns(3,4) | 401,99465   |
| 14           | c-Cbl ---/ ErBB1              | 10          | c-Cbl ---/ ErBB1          | 323,105858  |
| 123          | IFN pathway                   | 18          | IFN pathway               | 23423,9914  |
| 215          | TLR4 pathway                  | 87          | TLR4 pathway              | 7387,86316  |
| 26           | FasL ---> Caspase-3           | 255         | FasL ---> Caspase-3       | -2242,1965  |
| 27           | EGF ---> c-Fos                | 22          | EGF ---> c-Fos            | 286,728346  |
| 82           | RhoA ---> stress fiber format | 48          | RhoA ---> stress fiber fo | 758,09169   |
| 83           | RhoA pathway                  | 49          | RhoA pathway              | 758,09169   |



|                                          |                                          |            |
|------------------------------------------|------------------------------------------|------------|
| 178 IL-1beta ---> p50:RelA               | 151 IL-1beta ---> p50:RelA               | 212,464158 |
| 30 LAT ---> PKCtheta                     | 73 LAT ---> PKCtheta                     | -1160,239  |
| 100 LPS ---> p38                         | 143 LPS ---> p38                         | -817,73304 |
| 128 Rac1 pathway                         | 167 Rac1 pathway                         | -665,16308 |
| 73 parkin associated pathways            | 88 parkin associated pathways            | -305,18865 |
| 106 BCR ---> c-Jun                       | 89 BCR ---> c-Jun                        | 189,886039 |
| 122 IFNalpha, IFNbeta, IFNgamma          | 13 IFNalpha, IFNbeta, IFNgamma           | 18467,9747 |
| 180 TNF-alpha pathway                    | 189 TNF-alpha pathway                    | -429,95955 |
| 182 EDAR pathway                         | 206 EDAR pathway                         | -391,70697 |
| 68 Aurora-A cell cycle regulation        | 29 Aurora-A cell cycle regulation        | 489,956024 |
| 69 PPAR pathway                          | 149 PPAR pathway                         | -503,61367 |
| 70 Aurora-A activation, substrates       | 30 Aurora-A activation, substrates       | 489,956024 |
| 232 VEGF-A pathway                       | 202 VEGF-A pathway                       | 76,1903451 |
| 32 JIP-1 ---> APP                        | 31 JIP-1 ---> APP                        | 103,698855 |
| 71 LAT ---> cofilin                      | 186 LAT ---> cofilin                     | -832,31841 |
| 124 BCR ---> p38                         | 101 BCR ---> p38                         | 94,8232527 |
| 199 LPS ---> NF-kappaB                   | 180 LPS ---> NF-kappaB                   | 69,8904834 |
| 179 G1 phase (Cdk2)                      | 229 G1 phase (Cdk2)                      | -306,6831  |
| 242 tuberin pathway                      | 214 tuberin pathway                      | 49,9290496 |
| 183 G2/M phase (cyclin B:Cdk1)           | 124 G2/M phase (cyclin B:Cdk1)           | 833,327972 |
| 44 Apo2L ---Caspase-8---> Caspase-3      | 262 Apo2L ---Caspase-8---> Caspase-3     | -807,29202 |
| 45 PRL ---IRS---> PI3K                   | 46 PRL ---IRS---> PI3K                   | 77,4657654 |
| 99 cyclosome regulatory network          | 45 cyclosome regulatory network          | 318,470866 |
| 151 BCR ---MLK3---> c-Jun                | 144 BCR ---MLK3---> c-Jun                | 69,5303956 |
| 152 BCR ---> cytoskeletal reorganization | 179 BCR ---> cytoskeletal reorganization | -363,63664 |
| 153 insulin ---> glucose uptake          | 145 insulin ---> glucose uptake          | 69,5303956 |
| 24 EGF ---> STAT1alpha                   | 23 EGF ---> STAT1alpha                   | 64,8505929 |
| 25 ASK1 ---> p38alpha                    | 86 ASK1 ---> p38alpha                    | -616,07635 |
| 108 PRL ---PI3K---> AKT                  | 98 PRL ---PI3K---> AKT                   | 68,1711124 |
| 155 Htt pathway                          | 169 Htt pathway                          | -459,52582 |
| 217 S phase (Cdk2)                       | 243 S phase (Cdk2)                       | -123,83898 |
| 172 HIF-1alpha pathway                   | 218 HIF-1alpha pathway                   | -239,24138 |
| 104 p73 pathway                          | 231 p73 pathway                          | -363,43928 |
| 65 TNF-alpha ---> c-Jun                  | 63 TNF-alpha ---> c-Jun                  | 59,5656843 |
| 66 Caspase-9 ---> Caspases               | 130 Caspase-9 ---> Caspases              | -444,41963 |
| 67 PRL ---> PAK1                         | 66 PRL ---> PAK1                         | 59,5656843 |
| 64 AhR pathway                           | 146 AhR pathway                          | -306,75736 |
| 252 insulin ---> AKT-1 pathway           | 215 insulin ---> AKT-1 pathway           | 222,1346   |
| 131 RANKL ---> AKT                       | 125 RANKL ---> AKT                       | 47,5323697 |
| 132 dsRNA ---> IKK-alpha:IKK-beta        | 69 dsRNA ---> IKK-alpha:IKK-beta         | 966,45912  |
| 109 G-alpha-q ---> arachidonic acid      | 122 G-alpha-q ---> arachidonic acid      | -93,233702 |
| 110 fMLP ---> superoxide                 | 123 fMLP ---> superoxide                 | -93,233702 |

|                                   |                                |            |
|-----------------------------------|--------------------------------|------------|
| 96 EDA-A2 ---> c-Jun              | 72 EDA-A2 ---> c-Jun           | 46,8683803 |
| 33 EGF ---> SHIP1                 | 32 EGF ---> SHIP1              | 43,9991697 |
| 34 Cis ---/ PRLR                  | 33 Cis ---/ PRLR               | 43,9991697 |
| 35 EGF ---> STAT3                 | 35 EGF ---> STAT3              | 43,9991697 |
| 36 SOCS-1 ---/ PRL                | 37 SOCS-1 ---/ PRL             | 43,9991697 |
| 38 SOCS-3 ---/ EpoR               | 38 SOCS-3 ---/ EpoR            | 43,9991697 |
| 39 SOCS-3 ---/ PRLR               | 39 SOCS-3 ---/ PRLR            | 43,9991697 |
| 216 MHC class II ---> NF-AT       | 242 MHC class II ---> NF-A'    | -201,90382 |
| 126 cyclosome regulation          | 67 cyclosome regulation        | 161,594293 |
| 176 LAT ---> p50:RelA             | 152 LAT ---> p50:RelA          | 34,6367644 |
| 177 LPS ---> JNK                  | 153 LPS ---> JNK               | 34,6367644 |
| 107 PRL ---> Raf-1                | 95 PRL ---> Raf-1              | 42,9139548 |
| 47 Smac ---/ cIAP-2               | 133 Smac ---/ cIAP-2           | -320,57927 |
| 48 SHP-2 ---> PRL                 | 50 SHP-2 ---> PRL              | 31,7476032 |
| 49 Smac ---/ cIAP-1               | 139 Smac ---/ cIAP-1           | -320,57927 |
| 50 DLK ---> c-Jun                 | 51 DLK ---> c-Jun              | 31,7476032 |
| 51 beta-arrestin2 ---> c-Jun      | 52 beta-arrestin2 ---> c-Jun   | 31,7476032 |
| 52 ASK1 ---DUSP19---> c-Jun       | 54 ASK1 ---DUSP19---> c-       | 31,7476032 |
| 53 PRL ---Gab-2---> PI3K          | 55 PRL ---Gab-2---> PI3K       | 31,7476032 |
| 54 PDGF B ---> PAK-1              | 56 PDGF B ---> PAK-1           | 31,7476032 |
| 127 dsRNA ---> c-Jun              | 21 dsRNA ---> c-Jun            | 3683,73871 |
| 133 LAT ---> Ras                  | 183 LAT ---> Ras               | -218,71727 |
| 134 LAT ---> MLC                  | 184 LAT ---> MLC               | -218,71727 |
| 135 MHC class I ---> LAT          | 187 MHC class I ---> LAT       | -218,71727 |
| 228 BCR ---> NF-AT                | 230 BCR ---> NF-AT             | -43,448585 |
| 243 Plk1 activation and substrate | 147 Plk1 activation and subst  | 11,6512727 |
| 244 Plk1 cell cycle regulation    | 148 Plk1 cell cycle regulation | 11,6512727 |
| 75 Epo ---> SHP-1                 | 70 Epo ---> SHP-1              | 23,7848013 |
| 76 GH pathway                     | 24 GH pathway                  | 1159,65478 |
| 77 PDGF A ---> Crk                | 71 PDGF A ---> Crk             | 23,7848013 |
| 79 GH ---> Grb-2                  | 25 GH ---> Grb-2               | 1159,65478 |
| 80 Nod1 ---> Caspase-9            | 165 Nod1 ---> Caspase-9        | -250,32701 |
| 81 JLP ---> JNK1                  | 166 JLP ---> JNK1              | -250,32701 |
| 193 insulin ---Shc---> MAPK cas   | 195 insulin ---Shc---> MAPK    | -39,914249 |
| 102 insulin ---Jak1---> IRS-1, IR | 92 insulin ---Jak1---> IRS-1   | 18,3635944 |
| 103 Src ---> Rap2B                | 93 Src ---> Rap2B              | 18,3635944 |
| 198 OSM pathway                   | 207 OSM pathway                | 111,261426 |
| 203 PRL ---Src,FAK1---> ERK       | 188 PRL ---Src,FAK1---> EF     | 10,8849    |
| 125 Epo ---> PIP3                 | 113 Epo ---> PIP3              | 14,4887252 |
| 231 TNF-alpha ---> NFkappaB       | 253 TNF-alpha ---> NFkappa     | -115,91745 |
| 181 OSM ---> ERK                  | 234 OSM ---> ERK               | 5,63840176 |
| 146 Apaf-1 ---> Caspase-7         | 127 Apaf-1 ---> Caspase-7      | 14,0214875 |
| 147 Apaf-1 ---> Caspase-3         | 129 Apaf-1 ---> Caspase-3      | 14,0214875 |
| 148 CD19 ---> PLCgamma2           | 131 CD19 ---> PLCgamma2        | 14,0214875 |
| 149 CHIP ---/ Pael-R              | 201 CHIP ---/ Pael-R           | -143,44515 |
| 150 Src ---/ RhoA                 | 132 Src ---/ RhoA              | 14,0214875 |
| 191 VEGF-A ---> PLA2              | 247 VEGF-A ---> PLA2           | -49,635998 |
| 156 activin A ---> Smad2          | 245 activin A ---> Smad2       | -165,2901  |

|                                  |                              |            |
|----------------------------------|------------------------------|------------|
| 157 activin A ---> Smad3         | 246 activin A ---> Smad3     | -165,2901  |
| 158 PRL ---Fyn---> PI3K          | 150 PRL ---Fyn---> PI3K      | 9,60463526 |
| 249 dsRNA ---> p50:RelA          | 120 dsRNA ---> p50:RelA      | 771,115611 |
| 55 ErbB1 ---> endophilin 1       | 58 ErbB1 ---> endophilin 1   | 10,1005967 |
| 57 MLK2 ---> JNK1                | 59 MLK2 ---> JNK1            | 10,1005967 |
| 60 MLK2 ---MKK3---> p38alph      | 157 MLK2 ---MKK3---> p38     | -161,66256 |
| 61 MLK2 ---MKK6---> p38alph      | 159 MLK2 ---MKK6---> p38     | -161,66256 |
| 62 TAK1 ---> p38alpha            | 160 TAK1 ---> p38alpha       | -161,66256 |
| 192 IFNalpha, IFNbeta ---> PI3K  | 118 IFNalpha, IFNbeta ---> I | 290,927646 |
| 229 VEGF-A ---> NO               | 204 VEGF-A ---> NO           | 6,12239717 |
| 230 insulin ---IRS---> PRK2, SHI | 205 insulin ---IRS---> PRK2, | 6,12239717 |
| 264 BCR ---> ERK                 | 252 BCR ---> ERK             | -14,495184 |
| 84 MEKK3 ---> ATF-2              | 171 MEKK3 ---> ATF-2         | -124,31694 |
| 85 MEKK2 ---MKK7---> JNK1        | 75 MEKK2 ---MKK7---> JI      | 7,18034885 |
| 86 MEKK2 ---> ATF-2              | 77 MEKK2 ---> ATF-2          | 7,18034885 |
| 87 GCK ---> MKK4                 | 78 GCK ---> MKK4             | 7,18034885 |
| 88 PDGF A ---> SHP-2             | 79 PDGF A ---> SHP-2         | 7,18034885 |
| 89 MKK4 ---> c-Jun               | 80 MKK4 ---> c-Jun           | 7,18034885 |
| 90 PDGF B ---> PKR               | 81 PDGF B ---> PKR           | 7,18034885 |
| 91 TAK1 ---> c-Jun               | 82 TAK1 ---> c-Jun           | 7,18034885 |
| 92 p38alpha ---> STAT3           | 173 p38alpha ---> STAT3      | -124,31694 |
| 93 JNK2 ---> doublecortin        | 174 JNK2 ---> doublecortin   | -124,31694 |
| 94 Epo ---Lyn---> STAT5A         | 83 Epo ---Lyn---> STAT5A     | 7,18034885 |
| 95 MEKK2 ---> ATF-2              | 85 MEKK2 ---> ATF-2          | 7,18034885 |
| 250 mTOR ----> S6, eIF-4E        | 170 mTOR ----> S6, eIF-4E    | 172,459989 |
| 260 ZAP-70 ---> Elk-1            | 232 ZAP-70 ---> Elk-1        | -24,169135 |
| 261 PDGF A ---> ERK              | 240 PDGF A ---> ERK          | 2,10304053 |
| 262 AKT, MAPKAPK2 ---/ tuber     | 233 AKT, MAPKAPK2 ---/ t     | -24,169135 |
| 263 PDGF B ---> ERK              | 241 PDGF B ---> ERK          | 2,10304053 |
| 111 MKP-5 ---/ p53; MKK4 --->    | 102 MKP-5 ---/ p53; MKK4     | 5,43451329 |
| 112 VEGF-A ---> Ras              | 34 VEGF-A ---> Ras           | 484,560247 |
| 113 PKCdelta ---> GRK2           | 36 PKCdelta ---> GRK2        | 484,560247 |
| 114 PRL ---> Jak2                | 104 PRL ---> Jak2            | 5,43451329 |
| 115 PDGF B ---> Src              | 105 PDGF B ---> Src          | 5,43451329 |
| 116 PDGF A ---> Src              | 107 PDGF A ---> Src          | 5,43451329 |
| 117 SHP-1 ---/ ErbB1             | 108 SHP-1 ---/ ErbB1         | 5,43451329 |
| 118 CD148 ---/ PDGFRbeta         | 109 CD148 ---/ PDGFRbeta     | 5,43451329 |
| 119 PRL ---Jak2---> STAT5A       | 110 PRL ---Jak2---> STAT5,   | 5,43451329 |
| 120 Unc18-1 ---/ PLD2            | 193 Unc18-1 ---/ PLD2        | -98,997621 |
| 248 beta-catenin network         | 235 beta-catenin network     | 34,4698562 |
| 137 PRL ---Src---> STAT5B        | 134 PRL ---Src---> STAT5B    | 4,16754545 |
| 138 Smac ---> Caspase-3          | 135 Smac ---> Caspase-3      | 4,16754545 |
| 139 PTEN ---/ AKT-1              | 136 PTEN ---/ AKT-1          | 4,16754545 |
| 141 Epo ---> STAT5               | 138 Epo ---> STAT5           | 4,16754545 |

|                                   |                                   |            |
|-----------------------------------|-----------------------------------|------------|
| 143 EDAR ---> TRAF2               | 140 EDAR ---> TRAF2               | 4,16754545 |
| 144 ASK1 ---MKK4---> JNK1         | 53 ASK1 ---MKK4---> JNK1          | 356,494417 |
| 173 PDGF B ---> STATs             | 163 PDGF B ---> STATs             | 3,23229329 |
| 174 JNK1 ---> Bax                 | 164 JNK1 ---> Bax                 | 3,23229329 |
| 253 VEGF-A ---/ Caspase-9, Bad    | 219 VEGF-A ---/ Caspase-9, Bad    | 55,3539163 |
| 254 IL-12 - STAT4 pathway         | 220 IL-12 - STAT4 pathway         | 55,3539163 |
| 255 IL-12 ---> STAT4              | 221 IL-12 ---> STAT4              | 55,3539163 |
| 194 PDGF B ---SHP-2---> Ras; P    | 112 PDGF B ---SHP-2---> Ras; P    | 186,702626 |
| 196 SLP-65 ---/ Raf-1             | 181 SLP-65 ---/ Raf-1             | 2,02664399 |
| 197 PDGF B---/ Ras                | 116 PDGF B---/ Ras                | 186,702626 |
| 266 IFNalpha, IFNbeta ---> STATs  | 203 IFNalpha, IFNbeta ---> STATs  | 77,350177  |
| 218 IL-22 ---> STAT1alpha, STAT4  | 61 IL-22 ---> STAT1alpha, STAT4   | 662,994819 |
| 219 Fer ---> beta-cateninp{Tyr14  | 197 Fer ---> beta-cateninp{Tyr14  | 1,54286672 |
| 220 PDGF A ---> AKT-1             | 198 PDGF A ---> AKT-1             | 1,54286672 |
| 221 IL-22 pathway                 | 62 IL-22 pathway                  | 662,994819 |
| 222 IFNalpha, IFNbeta ---> STATs  | 126 IFNalpha, IFNbeta ---> STATs  | 159,009508 |
| 223 IL-10 pathway                 | 64 IL-10 pathway                  | 662,994819 |
| 224 PDK1 ---> 4E-BP1, p70S6K1     | 128 PDK1 ---> 4E-BP1, p70S6K1     | 159,009508 |
| 225 PDGF B ---> AKT-1             | 200 PDGF B ---> AKT-1             | 1,54286672 |
| 226 EGF ---> PLD2                 | 258 EGF ---> PLD2                 | -49,368182 |
| 227 IL-10 ---> STAT1alpha, STAT4  | 65 IL-10 ---> STAT1alpha, STAT4   | 662,994819 |
| 239 EGF ---> DAG, IP3             | 226 EGF ---> DAG, IP3             | 1,11706283 |
| 240 Src ---> Rac1                 | 227 Src ---> Rac1                 | 1,11706283 |
| 241 Rac1 ---> c-Jun, Elk-1        | 228 Rac1 ---> c-Jun, Elk-1        | 1,11706283 |
| 200 PDGF A ---> DAG, IP3          | 209 PDGF A ---> DAG, IP3          | -8,3625751 |
| 201 PDGF B --> DAG, IP3           | 212 PDGF B --> DAG, IP3           | -8,3625751 |
| 202 PI3K ---/ p53                 | 213 PI3K ---/ p53                 | -8,3625751 |
| 251 Csk, CD45 ---> Lck            | 236 Csk, CD45 ---> Lck            | 0,7282736  |
| 265 Csk, CD45 ---> Fyn            | 244 Csk, CD45 ---> Fyn            | 0,5094916  |
| 275 G2/M phase (cyclin A:Cdk1)    | 185 G2/M phase (cyclin A:Cdk1)    | 97,4876955 |
| 245 VHL ---> HIF-1alpha degrad    | 237 VHL ---> HIF-1alpha degrad    | -5,2530969 |
| 246 IL-4 - STAT6 pathway          | 96 IL-4 - STAT6 pathway           | 484,844596 |
| 247 IL-4 ---> STAT6               | 97 IL-4 ---> STAT6                | 484,844596 |
| 129 MKK6 ---> Hsp27               | 121 MKK6 ---> Hsp27               | 0,8233778  |
| 267 Caspase-3 ---/ p53            | 256 Caspase-3 ---/ p53            | -3,2546944 |
| 268 IL-8 ---> ERK2                | 257 IL-8 ---> ERK2                | -3,2546944 |
| 269 Eps15 ---> ErbB internalizati | 260 Eps15 ---> ErbB internalizati | -3,2546944 |
| 270 Hsp90 ---> AhR                | 261 Hsp90 ---> AhR                | -3,2546944 |
| 159 MEK-1 ---> HIF-1alpha         | 154 MEK-1 ---> HIF-1alpha         | 0,99621226 |
| 161 p38alpha ---> CREB            | 155 p38alpha ---> CREB            | 0,99621226 |
| 164 MKK4 ---/ RXR-alpha           | 156 MKK4 ---/ RXR-alpha           | 0,99621226 |
| 170 MEKK4 ---> JNK1               | 161 MEKK4 ---> JNK1               | 0,99621226 |
| 185 MKK7 ---> c-Jun               | 172 MKK7 ---> c-Jun               | 0,39128725 |
| 187 PP2Calpha ---/ MKK4           | 175 PP2Calpha ---/ MKK4           | 0,39128725 |

|                              |                            |            |
|------------------------------|----------------------------|------------|
| 188 PP2Calpha ---/ MKK6      | 176 PP2Calpha ---/ MKK6    | 0,39128725 |
| 189 Caspase-6 ---> Caspase-3 | 84 Caspase-6 ---> Caspase- | 131,888579 |
| 208 VEGF-A ---> STAT1alpha   | 103 VEGF-A ---> STAT1alp   | 104,655952 |
| 209 EGF ---> N-WASP          | 190 EGF ---> N-WASP        | 0,22381773 |
| 210 LMW-PTP ---/ VEGFR-1     | 106 LMW-PTP ---/ VEGFR-    | 104,655952 |
| 211 Fas ---/ SRF             | 191 Fas ---/ SRF           | 0,22381773 |
| 212 Fas ---/ NuMA            | 192 Fas ---/ NuMA          | 0,22381773 |
| 214 Rac1 ---> p38            | 194 Rac1 ---> p38          | 0,22381773 |
| 276 IL-2 ---> STAT5          | 114 IL-2 ---> STAT5        | 243,760166 |
| 277 IL-2 - STAT5 pathway     | 115 IL-2 - STAT5 pathway   | 243,760166 |
| 278 OSM ---> STAT1           | 117 OSM ---> STAT1         | 243,760166 |
| 279 c-Kit pathway            | 182 c-Kit pathway          | 59,0841844 |
| 234 E1 ---/ cyclin E         | 222 E1 ---/ cyclin E       | 0,06986955 |
| 235 Rac1 ---> golgin-160     | 223 Rac1 ---> golgin-160   | 0,06986955 |
| 236 MKK4 ---/ PPAR-gamma     | 224 MKK4 ---/ PPAR-gamm    | 0,06986955 |
| 237 PDGF B ---> cortactin    | 225 PDGF B ---> cortactin  | 0,06986955 |
| 271 Rac1 ---MLK3---> c-Jun   | 248 Rac1 ---MLK3---> c-Jun | -0,1507663 |
| 272 HB-EGF ---> PI3K         | 249 HB-EGF ---> PI3K       | -0,1507663 |
| 274 Hsp90 ---> AhR           | 250 Hsp90 ---> AhR         | -0,1507663 |
| 256 POSH ---> JNK1, JNK2     | 239 POSH ---> JNK1, JNK2   | -0,0219422 |

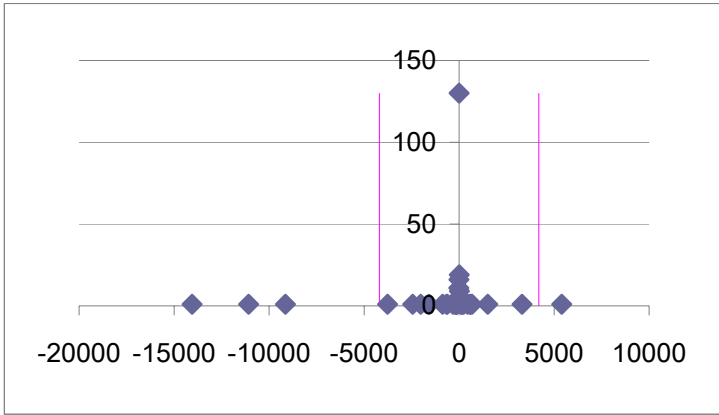

**Low vs control 3 table 17**

| Control Rank | Pathway name                     | Sample Rank | Pathway name                     | Delta Score |
|--------------|----------------------------------|-------------|----------------------------------|-------------|
| 1            | stress-associated pathways       | 1           | stress-associated pathways       | -4225618,1  |
| 3            | EGF pathway                      | 6           | EGF pathway                      | -308515,36  |
| 9            | JNK pathway                      | 10          | JNK pathway                      | -153139,74  |
| 5            | Fas pathway                      | 9           | Fas pathway                      | -181505,26  |
| 2            | p38 pathway                      | 2           | p38 pathway                      | 141663,471  |
| 7            | Epo pathway                      | 4           | Epo pathway                      | 59479,3978  |
| 4            | RANKL pathway                    | 3           | RANKL pathway                    | 58771,1312  |
| 13           | PRL pathway                      | 11          | PRL pathway                      | 37042,6937  |
| 28           | Caspase network                  | 29          | Caspase network                  | -15181,309  |
| 6            | BMP2 ---> p38alpha               | 5           | BMP2 ---> p38alpha               | 5527,16262  |
| 22           | Apo2L pathway                    | 18          | Apo2L pathway                    | 6306,7894   |
| 98           | T-cell antigen receptor pathway  | 104         | T-cell antigen receptor pathway  | -3934,4339  |
| 43           | TGFbeta pathway                  | 39          | TGFbeta pathway                  | 4488,03078  |
| 10           | JNK1 ---> MKK4                   | 15          | JNK1 ---> MKK4                   | -13512,186  |
| 11           | TAK1 ---> ATF-2                  | 8           | TAK1 ---> ATF-2                  | 2495,82516  |
| 17           | IL-8 pathway                     | 78          | IL-8 pathway                     | -9797,0704  |
| 105          | insulin pathway                  | 125         | insulin pathway                  | -2760,6608  |
| 12           | RANKL ---> MITF                  | 12          | RANKL ---> MITF                  | 1703,11352  |
| 101          | B-cell antigen receptor pathway  | 80          | B-cell antigen receptor pathway  | 2097,42062  |
| 16           | Epo ---> ERK1                    | 14          | Epo ---> ERK1                    | 1230,69523  |
| 8            | EGF ---> PAK1                    | 7           | EGF ---> PAK1                    | 766,308817  |
| 97           | PDGF pathway                     | 77          | PDGF pathway                     | 1149,69064  |
| 18           | IFNgamma ---> STAT1alpha         | 97          | IFNgamma ---> STAT1              | -5914,1514  |
| 154          | E2F network                      | 179         | E2F network                      | -1058,2087  |
| 15           | wnt pathway                      | 16          | wnt pathway                      | -1122,4335  |
| 41           | alpha Iib beta3 pathway          | 40          | alpha Iib beta3 pathway          | 843,881616  |
| 42           | alpha Iib beta3 ---> Rac1        | 41          | alpha Iib beta3 ---> Rac         | 843,881616  |
| 23           | EGF ---> ERK                     | 21          | EGF ---> ERK                     | 692,335017  |
| 121          | IL-1 pathway                     | 106         | IL-1 pathway                     | 621,907404  |
| 19           | ZAP-70 ---> c-Jun                | 17          | ZAP-70 ---> c-Jun                | 538,061624  |
| 31           | IL-1beta ---> c-Jun              | 27          | IL-1beta ---> c-Jun              | 421,708908  |
| 130          | TLR3 pathway                     | 124         | TLR3 pathway                     | 421,086088  |
| 72           | neurotensin pathway              | 98          | neurotensin pathway              | -556,78965  |
| 40           | fMLP pathway                     | 47          | fMLP pathway                     | -568,17089  |
| 46           | IL-1beta ---> Elk-1              | 46          | IL-1beta ---> Elk-1              | 386,097588  |
| 20           | EGF ---> PI3K-C2beta             | 19          | EGF ---> PI3K-C2beta             | 301,92456   |
| 21           | RANKL ---> JNK1                  | 20          | RANKL ---> JNK1                  | 301,92456   |
| 204          | p53 pathway                      | 192         | p53 pathway                      | 139,93427   |
| 29           | Epo ---> IP3, PtsIns(3,4)P       | 26          | Epo ---> IP3, PtsIns(3,4)        | 304,625718  |
| 14           | c-Cbl ---/ ErBB1                 | 13          | c-Cbl ---/ ErBB1                 | 246,098176  |
| 123          | IFN pathway                      | 154         | IFN pathway                      | -1028,002   |
| 215          | TLR4 pathway                     | 198         | TLR4 pathway                     | 183,808023  |
| 26           | FasL ---> Caspase-3              | 24          | FasL ---> Caspase-3              | 217,871093  |
| 27           | EGF ---> c-Fos                   | 25          | EGF ---> c-Fos                   | 217,871093  |
| 82           | RhoA ---> stress fiber formation | 42          | RhoA ---> stress fiber formation | 922,553134  |
| 83           | RhoA pathway                     | 43          | RhoA pathway                     | 922,553134  |

|                                 |                              |            |
|---------------------------------|------------------------------|------------|
| 178 IL-1beta ---> p50:RelA      | 158 IL-1beta ---> p50:RelA   | 160,500373 |
| 30 LAT ---> PKCtheta            | 79 LAT ---> PKCtheta         | -1160,0667 |
| 100 LPS ---> p38                | 96 LPS ---> p38              | 156,588364 |
| 128 Rac1 pathway                | 123 Rac1 pathway             | 146,103197 |
| 73 parkin associated pathway    | 38 parkin associated pathw   | 779,818516 |
| 106 BCR ---> c-Jun              | 101 BCR ---> c-Jun           | 147,559821 |
| 122 IFNalpha, IFNbeta, IFNg     | 178 IFNalpha, IFNbeta, IFN   | -610,17537 |
| 180 TNF-alpha pathway           | 205 TNF-alpha pathway        | -436,12489 |
| 182 EDAR pathway                | 127 EDAR pathway             | 1017,42864 |
| 68 Aurora-A cell cycle regula   | 81 Aurora-A cell cycle reg   | -155,37789 |
| 69 PPAR pathway                 | 82 PPAR pathway              | -155,37789 |
| 70 Aurora-A activation, subst   | 83 Aurora-A activation, su   | -155,37789 |
| 232 VEGF-A pathway              | 246 VEGF-A pathway           | -261,02442 |
| 32 JIP-1 ---> APP               | 30 JIP-1 ---> APP            | 79,1515752 |
| 71 LAT ---> cofilin             | 69 LAT ---> cofilin          | 88,5003242 |
| 124 BCR ---> p38                | 117 BCR ---> p38             | 72,1455615 |
| 199 LPS ---> NF-kappaB          | 197 LPS ---> NF-kappaB       | 53,0837473 |
| 179 G1 phase (Cdk2)             | 182 G1 phase (Cdk2)          | -112,48764 |
| 242 tuberin pathway             | 234 tuberin pathway          | 37,9617806 |
| 183 G2/M phase (cyclin B:Cdl    | 181 G2/M phase (cyclin B:C   | 49,51816   |
| 44 Apo2L ---Caspase-8---> C     | 44 Apo2L ---Caspase-8--->    | 59,1711226 |
| 45 PRL ---IRS---> PI3K          | 45 PRL ---IRS---> PI3K       | 59,1711226 |
| 99 cyclosome regulatory netw    | 105 cyclosome regulatory n   | -106,46961 |
| 151 BCR ---MLK3---> c-Jun       | 150 BCR ---MLK3---> c-Ju     | 52,9619467 |
| 152 BCR ---> cytoskeletal reor  | 151 BCR ---> cytoskeletal r  | 52,9619467 |
| 153 insulin ---> glucose uptake | 152 insulin ---> glucose upt | 52,9619467 |
| 24 EGF ---> STAT1alpha          | 22 EGF ---> STAT1alpha       | 49,6917809 |
| 25 ASK1 ---> p38alpha           | 23 ASK1 ---> p38alpha        | 49,6917809 |
| 108 PRL ---PI3K---> AKT         | 103 PRL ---PI3K---> AKT      | 51,9983661 |
| 155 Htt pathway                 | 153 Htt pathway              | 45,6193796 |
| 217 S phase (Cdk2)              | 235 S phase (Cdk2)           | -74,65273  |
| 172 HIF-1alpha pathway          | 119 HIF-1alpha pathway       | 189,005451 |
| 104 p73 pathway                 | 118 p73 pathway              | -88,120329 |
| 65 TNF-alpha ---> c-Jun         | 66 TNF-alpha ---> c-Jun      | 45,531586  |
| 66 Caspase-9 ---> Caspases      | 67 Caspase-9 ---> Caspase    | 45,531586  |
| 67 PRL ---> PAK1                | 68 PRL ---> PAK1             | 45,531586  |
| 252 insulin ---> AKT-1 pathwa   | 233 insulin ---> AKT-1 patf  | 46,931398  |
| 131 RANKL ---> AKT              | 130 RANKL ---> AKT           | 36,3003754 |
| 132 dsRNA ---> IKK-alpha:IK     | 131 dsRNA ---> IKK-alpha:    | 36,3003754 |
| 109 G-alpha-q ---> arachidonic  | 65 G-alpha-q ---> arachido   | 238,127677 |
| 110 fMLP ---> superoxide        | 126 fMLP ---> superoxide     | -72,921965 |
| 96 EDA-A2 ---> c-Jun            | 28 EDA-A2 ---> c-Jun         | 1358,2791  |



|                                     |                                     |            |
|-------------------------------------|-------------------------------------|------------|
| 33 EGF ---> SHIP1                   | 31 EGF ---> SHIP1                   | 33,7445438 |
| 34 Cis ---/ PRLR                    | 32 Cis ---/ PRLR                    | 33,7445438 |
| 35 EGF ---> STAT3                   | 33 EGF ---> STAT3                   | 33,7445438 |
| 36 SOCS-1 ---/ PRL                  | 34 SOCS-1 ---/ PRL                  | 33,7445438 |
| 37 Htt ---/ Caspase-8               | 35 Htt ---/ Caspase-8               | 33,7445438 |
| 38 SOCS-3 ---/ EpoR                 | 36 SOCS-3 ---/ EpoR                 | 33,7445438 |
| 39 SOCS-3 ---/ PRLR                 | 37 SOCS-3 ---/ PRLR                 | 33,7445438 |
| 216 MHC class II ---> NF-AT         | 204 MHC class II ---> NF-AT         | 23,0786688 |
| 126 cyclosome regulation            | 132 cyclosome regulation            | -60,332699 |
| 176 LAT ---> p50:RelA               | 159 LAT ---> p50:RelA               | 26,4874714 |
| 177 LPS ---> JNK                    | 160 LPS ---> JNK                    | 26,4874714 |
| 107 PRL ---> Raf-1                  | 102 PRL ---> Raf-1                  | 34,0587126 |
| 47 Smac ---/ cIAP-2                 | 48 Smac ---/ cIAP-2                 | 24,3689594 |
| 48 SHP-2 ---> PRL                   | 49 SHP-2 ---> PRL                   | 24,3689594 |
| 49 Smac ---/ cIAP-1                 | 50 Smac ---/ cIAP-1                 | 24,3689594 |
| 50 DLK ---> c-Jun                   | 51 DLK ---> c-Jun                   | 24,3689594 |
| 51 beta-arrestin2 ---> c-Jun        | 52 beta-arrestin2 ---> c-Jun        | 24,3689594 |
| 52 ASK1 ---DUSP19---> c-Jun         | 53 ASK1 ---DUSP19---> c-Jun         | 24,3689594 |
| 53 PRL ---Gab-2---> PI3K            | 54 PRL ---Gab-2---> PI3K            | 24,3689594 |
| 54 PDGF B ---> PAK-1                | 55 PDGF B ---> PAK-1                | 24,3689594 |
| 127 dsRNA ---> c-Jun                | 122 dsRNA ---> c-Jun                | 23,6659727 |
| 133 LAT ---> Ras                    | 133 LAT ---> Ras                    | 19,5455229 |
| 134 LAT ---> MLC                    | 134 LAT ---> MLC                    | 19,5455229 |
| 135 MHC class I ---> LAT            | 135 MHC class I ---> LAT            | 19,5455229 |
| 228 BCR ---> NF-AT                  | 245 BCR ---> NF-AT                  | -33,798482 |
| 243 Plk1 activation and substrates  | 201 Plk1 activation and substrates  | -69,426686 |
| 244 Plk1 cell cycle regulation      | 203 Plk1 cell cycle regulation      | -69,426686 |
| 74 MKK3 ---> HNF-1alpha             | 70 MKK3 ---> HNF-1alpha             | 18,2740667 |
| 75 Epo ---> SHP-1                   | 71 Epo ---> SHP-1                   | 18,2740667 |
| 76 GH pathway                       | 72 GH pathway                       | 18,2740667 |
| 77 PDGF A ---> Crk                  | 73 PDGF A ---> Crk                  | 18,2740667 |
| 78 Apo2L ---> Caspase-10            | 74 Apo2L ---> Caspase-10            | 18,2740667 |
| 79 GH ---> Grb-2                    | 75 GH ---> Grb-2                    | 18,2740667 |
| 80 Nod1 ---> Caspase-9              | 76 Nod1 ---> Caspase-9              | 18,2740667 |
| 81 JLP ---> JNK1                    | 164 JLP ---> JNK1                   | -248,69021 |
| 193 insulin ---Shc---> MAPK cascade | 202 insulin ---Shc---> MAPK cascade | -31,06123  |
| 102 insulin ---Jak1---> IRS-1, PI3K | 99 insulin ---Jak1---> IRS-1, PI3K  | 14,1229483 |
| 103 Src ---> Rap2B                  | 100 Src ---> Rap2B                  | 14,1229483 |
| 198 OSM pathway                     | 232 OSM pathway                     | -26,215987 |
| 203 PRL ---Src,FAK1---> ERK         | 200 PRL ---Src,FAK1---> ERK         | 8,38491144 |
| 125 Epo ---> PIP3                   | 120 Epo ---> PIP3                   | 11,1547375 |
| 231 TNF-alpha ---> NFkappaB         | 269 TNF-alpha ---> NFkappaB         | -111,69282 |
| 181 OSM ---> ERK                    | 191 OSM ---> ERK                    | -23,273187 |
| 146 Apaf-1 ---> Caspase-7           | 137 Apaf-1 ---> Caspase-7           | 11,3399484 |
| 147 Apaf-1 ---> Caspase-3           | 138 Apaf-1 ---> Caspase-3           | 11,3399484 |
| 148 CD19 ---> PLCgamma2             | 139 CD19 ---> PLCgamma2             | 11,3399484 |
| 149 CHIP ---/ Pael-R                | 225 CHIP ---/ Pael-R                | -142,42647 |
| 150 Src ---/ RhoA                   | 226 Src ---/ RhoA                   | -142,42647 |

|                                |                             |            |
|--------------------------------|-----------------------------|------------|
| 191 VEGF-A ---> PLA2           | 129 VEGF-A ---> PLA2        | 40,0603004 |
| 156 activin A ---> Smad2       | 155 activin A ---> Smad2    | 7,41200365 |
| 157 activin A ---> Smad3       | 156 activin A ---> Smad3    | 7,41200365 |
| 158 PRL ---Fyn---> PI3K        | 157 PRL ---Fyn---> PI3K     | 7,41200365 |
| 249 dsRNA ----> p50:RelA       | 252 dsRNA ----> p50:RelA    | -15,754259 |
| 55 ErbB1 ---> endophilin 1     | 56 ErbB1 ---> endophilin 1  | 7,80891924 |
| 56 TAO1 ---> p38alpha          | 57 TAO1 ---> p38alpha       | 7,80891924 |
| 57 MLK2 ---> JNK1              | 58 MLK2 ---> JNK1           | 7,80891924 |
| 58 TAO2 ---MKK6---> p38al      | 59 TAO2 ---MKK6---> p3      | 7,80891924 |
| 59 E1 ---/ ErbB3               | 60 E1 ---/ ErbB3            | 7,80891924 |
| 60 MLK2 ---MKK3---> p38a       | 61 MLK2 ---MKK3---> p3      | 7,80891924 |
| 61 MLK2 ---MKK6---> p38a       | 62 MLK2 ---MKK6---> p3      | 7,80891924 |
| 62 TAK1 ---> p38alpha          | 63 TAK1 ---> p38alpha       | 7,80891924 |
| 63 TAO2 ---MKK3---> p38al      | 64 TAO2 ---MKK3---> p3      | 7,80891924 |
| 192 IFNalpha, IFNbeta ---> PI  | 121 IFNalpha, IFNbeta ----> | 281,292408 |
| 229 VEGF-A ---> NO             | 270 VEGF-A ---> NO          | -76,530446 |
| 230 insulin ---IRS---> PRK2, 5 | 231 insulin ---IRS---> PRK  | 3,45929436 |
| 264 BCR ---> ERK               | 268 BCR ---> ERK            | -11,21061  |
| 84 MEKK3 ---> ATF-2            | 84 MEKK3 ---> ATF-2         | 5,56037367 |
| 85 MEKK2 ---MKK7---> JNK       | 85 MEKK2 ---MKK7--->        | 5,56037367 |
| 86 MEKK2 ---> ATF-2            | 86 MEKK2 ---> ATF-2         | 5,56037367 |
| 87 GCK ---> MKK4               | 87 GCK ---> MKK4            | 5,56037367 |
| 88 PDGF A ---> SHP-2           | 88 PDGF A ---> SHP-2        | 5,56037367 |
| 89 MKK4 ---> c-Jun             | 89 MKK4 ---> c-Jun          | 5,56037367 |
| 90 PDGF B ---> PKR             | 90 PDGF B ---> PKR          | 5,56037367 |
| 91 TAK1 ---> c-Jun             | 91 TAK1 ---> c-Jun          | 5,56037367 |
| 92 p38alpha ---> STAT3         | 92 p38alpha ---> STAT3      | 5,56037367 |
| 93 JNK2 ---> doublecortin      | 93 JNK2 ---> doublecortin   | 5,56037367 |
| 94 Epo ---Lyn---> STAT5A       | 94 Epo ---Lyn---> STAT5     | 5,56037367 |
| 95 MEKK2 ---> ATF-2            | 95 MEKK2 ---> ATF-2         | 5,56037367 |
| 250 mTOR ----> S6, eIF-4E      | 247 mTOR ----> S6, eIF-4E   | 2,20082808 |
| 260 ZAP-70 ---> Elk-1          | 257 ZAP-70 ---> Elk-1       | 1,65587112 |
| 261 PDGF A ---> ERK            | 258 PDGF A ---> ERK         | 1,65587112 |
| 262 AKT, MAPKAPK2 ---/ tu      | 259 AKT, MAPKAPK2 ---/      | 1,65587112 |
| 263 PDGF B ---> ERK            | 260 PDGF B ---> ERK         | 1,65587112 |
| 111 MKP-5 ---/ p53; MKK4 --    | 107 MKP-5 ---/ p53; MKK4    | 4,21522834 |
| 112 VEGF-A ---> Ras            | 108 VEGF-A ---> Ras         | 4,21522834 |
| 113 PKCdelta ---> GRK2         | 109 PKCdelta ---> GRK2      | 4,21522834 |
| 114 PRL ---> Jak2              | 110 PRL ---> Jak2           | 4,21522834 |
| 115 PDGF B ---> Src            | 111 PDGF B ---> Src         | 4,21522834 |
| 116 PDGF A ---> Src            | 112 PDGF A ---> Src         | 4,21522834 |
| 117 SHP-1 ---/ ErbB1           | 113 SHP-1 ---/ ErbB1        | 4,21522834 |
| 118 CD148 ---/ PDGFRbeta       | 114 CD148 ---/ PDGFRbeta    | 4,21522834 |
| 119 PRL ---Jak2---> STAT5A     | 115 PRL ---Jak2---> STAT    | 4,21522834 |

|                                     |                                     |            |
|-------------------------------------|-------------------------------------|------------|
| 120 Unc18-1 ---/ PLD2               | 116 Unc18-1 ---/ PLD2               | 4,21522834 |
| 248 beta-catenin network            | 251 beta-catenin network            | -8,8423145 |
| 136 MLK2 ---> NeuroD                | 140 MLK2 ---> NeuroD                | 3,23933989 |
| 137 PRL ---Src---> STAT5B           | 141 PRL ---Src---> STAT5I           | 3,23933989 |
| 138 Smac ---> Caspase-3             | 142 Smac ---> Caspase-3             | 3,23933989 |
| 139 PTEN ---/ AKT-1                 | 143 PTEN ---/ AKT-1                 | 3,23933989 |
| 140 Smurf-1 ---/ Smad7, TGFβ        | 144 Smurf-1 ---/ Smad7, TC          | 3,23933989 |
| 141 Epo ---> STAT5                  | 145 Epo ---> STAT5                  | 3,23933989 |
| 142 Htt ---> Ca                     | 146 Htt ---> Ca                     | 3,23933989 |
| 143 EDAR ---> TRAF2                 | 147 EDAR ---> TRAF2                 | 3,23933989 |
| 144 ASK1 ---MKK4---> JNK1           | 148 ASK1 ---MKK4---> JN             | 3,23933989 |
| 145 Fas ---/ Cdc42                  | 149 Fas ---/ Cdc42                  | 3,23933989 |
| 173 PDGF B ---> STATs               | 161 PDGF B ---> STATs               | 2,5189045  |
| 174 JNK1 ---> Bax                   | 162 JNK1 ---> Bax                   | 2,5189045  |
| 175 Htt ---> NeuroD                 | 163 Htt ---> NeuroD                 | 2,5189045  |
| 253 VEGF-A ---/ Caspase-9, B        | 262 VEGF-A ---/ Caspase-9           | -7,2655744 |
| 254 IL-12 - STAT4 pathway           | 263 IL-12 - STAT4 pathway           | -7,2655744 |
| 255 IL-12 ---> STAT4                | 264 IL-12 ---> STAT4                | -7,2655744 |
| 194 PDGF B ---SHP-2---> Ras         | 193 PDGF B ---SHP-2---> I           | 1,59031354 |
| 195 BMP7 ---> Smad1, Smad5          | 194 BMP7 ---> Smad1, Smad5          | 1,59031354 |
| 196 SLP-65 ---/ Raf-1               | 195 SLP-65 ---/ Raf-1               | 1,59031354 |
| 197 PDGF B---/ Ras                  | 196 PDGF B---/ Ras                  | 1,59031354 |
| 266 IFNalpha, IFNbeta ---> STAT     | 230 IFNalpha, IFNbeta ---> STAT     | 74,0268785 |
| 218 IL-22 ---> STAT1alpha, STAT3    | 216 IL-22 ---> STAT1alpha           | 1,21768551 |
| 219 Fer ---> beta-catenin{Tyrosine} | 217 Fer ---> beta-catenin{Tyrosine} | 1,21768551 |
| 220 PDGF A ---> AKT-1               | 218 PDGF A ---> AKT-1               | 1,21768551 |
| 221 IL-22 pathway                   | 219 IL-22 pathway                   | 1,21768551 |
| 222 IFNalpha, IFNbeta ---> STAT     | 136 IFNalpha, IFNbeta ---> STAT     | 154,984104 |
| 223 IL-10 pathway                   | 220 IL-10 pathway                   | 1,21768551 |
| 224 PDK1 ---> 4E-BP1, p70S6         | 221 PDK1 ---> 4E-BP1, p70S6         | 1,21768551 |
| 225 PDGF B ---> AKT-1               | 222 PDGF B ---> AKT-1               | 1,21768551 |
| 226 EGF ---> PLD2                   | 223 EGF ---> PLD2                   | 1,21768551 |
| 227 IL-10 ---> STAT1alpha, STAT3    | 224 IL-10 ---> STAT1alpha           | 1,21768551 |
| 238 TGFbeta ---> Smad2, Smad3       | 241 TGFbeta ---> Smad2, STAT3       | 0,88970021 |
| 239 EGF ---> DAG, IP3               | 242 EGF ---> DAG, IP3               | 0,88970021 |
| 240 Src ---> Rac1                   | 243 Src ---> Rac1                   | 0,88970021 |
| 241 Rac1 ---> c-Jun, Elk-1          | 244 Rac1 ---> c-Jun, Elk-1          | 0,88970021 |
| 200 PDGF A ---> DAG, IP3            | 227 PDGF A ---> DAG, IP3            | -6,4709086 |
| 201 PDGF B --> DAG, IP3             | 228 PDGF B --> DAG, IP3             | -6,4709086 |
| 202 PI3K ---/ p53                   | 229 PI3K ---/ p53                   | -6,4709086 |
| 251 Csk, CD45 ---> Lck              | 248 Csk, CD45 ---> Lck              | 0,59019364 |
| 265 Csk, CD45 ---> Fyn              | 261 Csk, CD45 ---> Fyn              | 0,42248261 |
| 275 G2/M phase (cyclin A:Cdk2)      | 273 G2/M phase (cyclin A:Cdk2)      | -4,8873924 |
| 246 IL-4 - STAT6 pathway            | 249 IL-4 - STAT6 pathway            | -4,0546009 |

|                                 |                               |            |
|---------------------------------|-------------------------------|------------|
| 247 IL-4 ---> STAT6             | 250 IL-4 ---> STAT6           | -4,0546009 |
| 129 MKK6 ---> Hsp27             | 128 MKK6 ---> Hsp27           | 0,65351849 |
| 268 IL-8 ---> ERK2              | 271 IL-8 ---> ERK2            | -2,5051381 |
| 269 Eps15 ---> ErbB internaliz  | 272 Eps15 ---> ErbB internz   | -2,5051381 |
| 159 MEK-1 ---> HIF-1alpha       | 165 MEK-1 ---> HIF-1alphz     | 0,47106178 |
| 160 MKK6 ---/ MRF4              | 166 MKK6 ---/ MRF4            | 0,47106178 |
| 161 p38alpha ---> CREB          | 167 p38alpha ---> CREB        | 0,47106178 |
| 162 E1 ---/ alpha-tubulin       | 168 E1 ---/ alpha-tubulin     | 0,47106178 |
| 163 MKK6 ---> p53               | 169 MKK6 ---> p53             | 0,47106178 |
| 164 MKK4 ---/ RXR-alpha         | 170 MKK4 ---/ RXR-alpha       | 0,47106178 |
| 165 MKK4 ---p38alpha---> A1     | 171 MKK4 ---p38alpha--->      | 0,47106178 |
| 166 E1 ---/ synaptotagmin-11    | 172 E1 ---/ synaptotagmin-1   | 0,47106178 |
| 167 E1 ---/ beta-tubulin        | 173 E1 ---/ beta-tubulin      | 0,47106178 |
| 168 E1 ---/ Septin5             | 174 E1 ---/ Septin5           | 0,47106178 |
| 169 E1 ---dorfin---/ synphilin- | 175 E1 ---dorfin---/ synphili | 0,47106178 |
| 170 MEKK4 ---> JNK1             | 176 MEKK4 ---> JNK1           | 0,47106178 |
| 171 E1 ---parkin---/ synphilin- | 177 E1 ---parkin---/ synphil  | 0,47106178 |
| 184 inhibitory phosphorylation  | 183 inhibitory phosphorylat   | 0,31843894 |
| 185 MKK7 ---> c-Jun             | 184 MKK7 ---> c-Jun           | 0,31843894 |
| 186 Fas ---> Caspase-8          | 186 Fas ---> Caspase-8        | 0,31843894 |
| 187 PP2Calpha ---/ MKK4         | 187 PP2Calpha ---/ MKK4       | 0,31843894 |
| 188 PP2Calpha ---/ MKK6         | 188 PP2Calpha ---/ MKK6       | 0,31843894 |
| 189 Caspase-6 ---> Caspase-3    | 189 Caspase-6 ---> Caspase    | 0,31843894 |
| 190 MEKK4 --MKK6---> ATI        | 190 MEKK4 --MKK6---> A        | 0,31843894 |
| 205 Rac1 ---/ cofilin           | 206 Rac1 ---/ cofilin         | 0,18899377 |
| 206 Fas ---> Abl                | 207 Fas ---> Abl              | 0,18899377 |
| 207 E1 ---/ alpha-synuclein     | 208 E1 ---/ alpha-synuclein   | 0,18899377 |
| 208 VEGF-A ---> STAT1alph:      | 209 VEGF-A ---> STAT1al       | 0,18899377 |
| 209 EGF ---> N-WASP             | 210 EGF ---> N-WASP           | 0,18899377 |
| 210 LMW-PTP ---/ VEGFR-1        | 211 LMW-PTP ---/ VEGFR        | 0,18899377 |
| 211 Fas ---/ SRF                | 212 Fas ---/ SRF              | 0,18899377 |
| 212 Fas ---/ NuMA               | 213 Fas ---/ NuMA             | 0,18899377 |
| 213 xolloid ---> BMP4           | 214 xolloid ---> BMP4         | 0,18899377 |
| 214 Rac1 ---> p38               | 215 Rac1 ---> p38             | 0,18899377 |
| 276 IL-2 ---> STAT5             | 274 IL-2 ---> STAT5           | -1,9564567 |
| 277 IL-2 - STAT5 pathway        | 275 IL-2 - STAT5 pathway      | -1,9564567 |
| 278 OSM ---> STAT1              | 276 OSM ---> STAT1            | -1,9564567 |
| 279 c-Kit pathway               | 277 c-Kit pathway             | -1,9564567 |
| 233 Fas ---/ PRK2               | 236 Fas ---/ PRK2             | 0,07016549 |
| 234 E1 ---/ cyclin E            | 237 E1 ---/ cyclin E          | 0,07016549 |
| 235 Rac1 ---> golgin-160        | 238 Rac1 ---> golgin-160      | 0,07016549 |
| 236 MKK4 ---/ PPAR-gamma        | 239 MKK4 ---/ PPAR-gamr       | 0,07016549 |
| 237 PDGF B ---> cortactin       | 240 PDGF B ---> cortactin     | 0,07016549 |
| 271 Rac1 ---MLK3---> c-Jun      | 265 Rac1 ---MLK3---> c-Ju     | -0,0996784 |
| 272 HB-EGF ---> PI3K            | 266 HB-EGF ---> PI3K          | -0,0996784 |

|                          |                          |            |
|--------------------------|--------------------------|------------|
| 273 c-Jun degradation    | 267 c-Jun degradation    | -0,0996784 |
| 256 POSH ---> JNK1, JNK2 | 253 POSH ---> JNK1, JNK2 | -0,0004699 |
| 257 Fas ---> Caspase-2   | 254 Fas ---> Caspase-2   | -0,0004699 |
| 258 Ubc9 ---/ p73alpha   | 255 Ubc9 ---/ p73alpha   | -0,0004699 |

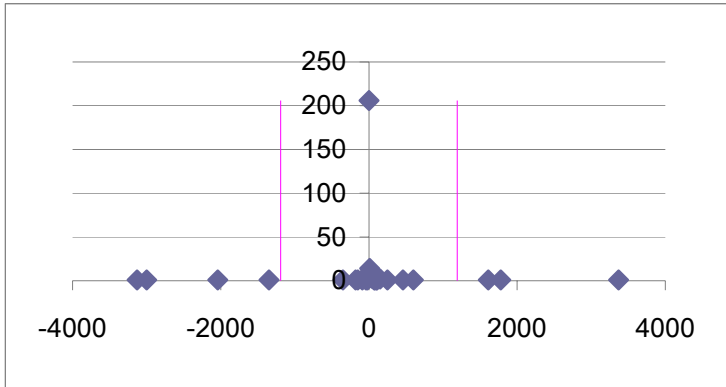

**Low vs control 4 table 18**

| Control Rank | Pathway name                    | Sample Rank | Pathway name                     | Delta Score |
|--------------|---------------------------------|-------------|----------------------------------|-------------|
|              | 1 stress-associated pathways    |             | 1 stress-associated pathways     | -7676094,7  |
|              | 2 Epo pathway                   |             | 3 Epo pathway                    | -937979,59  |
|              | 5 JNK pathway                   |             | 4 JNK pathway                    | -321067,55  |
|              | 7 EGF pathway                   |             | 7 EGF pathway                    | -430160,82  |
|              | 6 PRL pathway                   |             | 8 PRL pathway                    | -664745,47  |
|              | 3 RANKL pathway                 |             | 6 RANKL pathway                  | -258627,31  |
|              | 33 insulin pathway              |             | 60 insulin pathway               | -25157,486  |
|              | 9 Epo ---> ERK1                 |             | 11 Epo ---> ERK1                 | -13398,042  |
|              | 34 PDGF pathway                 |             | 42 PDGF pathway                  | -7207,7371  |
|              | 57 B-cell antigen receptor path |             | 111 B-cell antigen receptor path | -14179,736  |
|              | 8 BMP2 ---> p38alpha            |             | 9 BMP2 ---> p38alpha             | -11492,62   |
|              | 88 T-cell antigen receptor path |             | 94 T-cell antigen receptor path  | -3410,1091  |
|              | 12 IFNgamma ---> STAT1alph      |             | 2 IFNgamma ---> STAT1alpl        | 81524,3241  |
|              | 22 alpha Iib beta3 pathway      |             | 40 alpha Iib beta3 pathway       | -9787,1438  |
|              | 23 alpha Iib beta3 ---> Rac1    |             | 41 alpha Iib beta3 ---> Rac1     | -9787,1438  |
|              | 4 EGF ---> PAK1                 |             | 5 EGF ---> PAK1                  | -7828,1786  |
|              | 56 Fas pathway                  |             | 68 Fas pathway                   | -4664,7848  |
|              | 16 EGF ---> ERK                 |             | 19 EGF ---> ERK                  | -7512,1749  |
|              | 55 IL-1 pathway                 |             | 99 IL-1 pathway                  | -7683,7192  |
|              | 13 ZAP-70 ---> c-Jun            |             | 15 ZAP-70 ---> c-Jun             | -5709,7202  |
|              | 42 p38 pathway                  |             | 74 p38 pathway                   | -6241,4128  |
|              | 11 TAK1 ---> ATF-2              |             | 12 TAK1 ---> ATF-2               | -4544,9957  |
|              | 21 IL-1beta ---> c-Jun          |             | 28 IL-1beta ---> c-Jun           | -4581,3724  |
|              | 17 RANKL ---> MITF              |             | 20 RANKL ---> MITF               | -4249,7591  |
|              | 14 RANKL ---> JNK1              |             | 17 RANKL ---> JNK1               | -3210,4538  |
|              | 15 EGF ---> PI3K-C2beta         |             | 16 EGF ---> PI3K-C2beta          | -3210,4538  |
|              | 65 IFN pathway                  |             | 18 IFN pathway                   | 19620,4253  |
|              | 19 Epo ---> IP3, PtsIns(3,4)P   |             | 27 Epo ---> IP3, PtsIns(3,4)P    | -3245,9518  |
|              | 189 Caspase network             |             | 208 Caspase network              | -448,28074  |
|              | 10 c-Cbl ---/ ErBB1             |             | 10 c-Cbl ---/ ErBB1              | -2544,6952  |
|              | 135 TLR4 pathway                |             | 87 TLR4 pathway                  | 4707,39832  |
|              | 110 TLR3 pathway                |             | 26 TLR3 pathway                  | 21621,6116  |
|              | 18 EGF ---> c-Fos               |             | 22 EGF ---> c-Fos                | -2287,5835  |
|              | 89 Apo2L pathway                |             | 142 Apo2L pathway                | -2408,4872  |
|              | 170 E2F network                 |             | 100 E2F network                  | 4309,2346   |
|              | 111 IL-1beta ---> p50:RelA      |             | 151 IL-1beta ---> p50:RelA       | -1946,5118  |
|              | 54 neurotensin pathway          |             | 47 neurotensin pathway           | 470,803888  |
|              | 63 BCR ---> c-Jun               |             | 89 BCR ---> c-Jun                | -1475,9317  |
|              | 64 IL-1beta ---> Elk-1          |             | 90 IL-1beta ---> Elk-1           | -1475,9317  |
|              | 87 G2/M phase (cyclin B:Cdk1    |             | 124 G2/M phase (cyclin B:Cdk1    | -1484,7253  |
|              | 43 RhoA ---> stress fiber forma |             | 48 RhoA ---> stress fiber form:  | 79,7031455  |
|              | 44 RhoA pathway                 |             | 49 RhoA pathway                  | 79,7031455  |
|              | 80 IFNalpha, IFNbeta, IFNgam    |             | 13 IFNalpha, IFNbeta, IFNgan     | 17032,6069  |
|              | 209 p53 pathway                 |             | 178 p53 pathway                  | 1383,79166  |
|              | 91 IL-8 pathway                 |             | 43 IL-8 pathway                  | 2404,12436  |
|              | 53 fMLP pathway                 |             | 57 fMLP pathway                  | 57,2213329  |

|                                 |                                 |            |
|---------------------------------|---------------------------------|------------|
| 32 wnt pathway                  | 14 wnt pathway                  | 2219,2154  |
| 24 JIP-1 ---> APP               | 31 JIP-1 ---> APP               | -861,54428 |
| 84 BCR ---> p38                 | 101 BCR ---> p38                | -813,22692 |
| 145 LPS ---> NF-kappaB          | 180 LPS ---> NF-kappaB          | -699,49207 |
| 129 Rac1 pathway                | 167 Rac1 pathway                | -674,02007 |
| 35 PRL ---IRS---> PI3K          | 46 PRL ---IRS---> PI3K          | -638,9838  |
| 212 TGFbeta pathway             | 196 TGFbeta pathway             | 300,640415 |
| 107 LPS ---> p38                | 143 LPS ---> p38                | -622,08226 |
| 108 insulin ---> glucose uptake | 145 insulin ---> glucose uptake | -622,08226 |
| 109 BCR ---MLK3---> c-Jun       | 144 BCR ---MLK3---> c-Jun       | -622,08226 |
| 168 tuberin pathway             | 214 tuberin pathway             | -537,6783  |
| 79 PRL ---PI3K---> AKT          | 98 PRL ---PI3K---> AKT          | -593,95904 |
| 20 EGF ---> STAT1alpha          | 23 EGF ---> STAT1alpha          | -536,64953 |
| 86 parkin associated pathways   | 88 parkin associated pathways   | 20,6686123 |
| 45 IL-22 ---> STAT1alpha, ST.   | 61 IL-22 ---> STAT1alpha, ST    | -500,36958 |
| 46 IL-22 pathway                | 62 IL-22 pathway                | -500,36958 |
| 47 TNF-alpha ---> c-Jun         | 63 TNF-alpha ---> c-Jun         | -500,36958 |
| 48 IL-10 ---> STAT1alpha, ST.   | 65 IL-10 ---> STAT1alpha, ST    | -500,36958 |
| 49 IL-10 pathway                | 64 IL-10 pathway                | -500,36958 |
| 50 PRL ---> PAK1                | 66 PRL ---> PAK1                | -500,36958 |
| 196 VEGF-A pathway              | 202 VEGF-A pathway              | -23,057567 |
| 160 EDAR pathway                | 206 EDAR pathway                | -424,02414 |
| 104 RANKL ---> AKT              | 125 RANKL ---> AKT              | -423,04912 |
| 62 EDA-A2 ---> c-Jun            | 72 EDA-A2 ---> c-Jun            | -402,30142 |
| 25 EGF ---> SHIP1               | 32 EGF ---> SHIP1               | -372,8499  |
| 26 Cis ---/ PRLR                | 33 Cis ---/ PRLR                | -372,8499  |
| 27 VEGF-A ---> Ras              | 34 VEGF-A ---> Ras              | -372,8499  |
| 28 EGF ---> STAT3               | 35 EGF ---> STAT3               | -372,8499  |
| 29 SOCS-3 ---/ EpoR             | 38 SOCS-3 ---/ EpoR             | -372,8499  |
| 30 SOCS-1 ---/ PRL              | 37 SOCS-1 ---/ PRL              | -372,8499  |
| 31 SOCS-3 ---/ PRLR             | 39 SOCS-3 ---/ PRLR             | -372,8499  |
| 66 Aurora-A cell cycle regulati | 29 Aurora-A cell cycle regulati | 654,562351 |
| 67 Aurora-A activation, substra | 30 Aurora-A activation, substra | 654,562351 |
| 68 PPAR pathway                 | 149 PPAR pathway                | -339,00735 |
| 203 S phase (Cdk2)              | 243 S phase (Cdk2)              | -287,03886 |
| 206 insulin ---> AKT-1 pathway  | 215 insulin ---> AKT-1 pathway  | 27,7599446 |
| 81 PRL ---> Raf-1               | 95 PRL ---> Raf-1               | -330,7043  |
| 127 LPS ---> JNK                | 153 LPS ---> JNK                | -327,32379 |
| 128 LAT ---> p50:RelA           | 152 LAT ---> p50:RelA           | -327,32379 |
| 90 dsRNA ---> c-Jun             | 21 dsRNA ---> c-Jun             | 3370,22696 |
| 36 DLK ---> c-Jun               | 51 DLK ---> c-Jun               | -280,63942 |
| 37 beta-arrestin2 ---> c-Jun    | 52 beta-arrestin2 ---> c-Jun    | -280,63942 |

|                                   |                                   |            |
|-----------------------------------|-----------------------------------|------------|
| 38 ASK1 ---DUSP19---> c-Jun       | 54 ASK1 ---DUSP19---> c-Jun       | -280,63942 |
| 39 PRL ---Gab-2---> PI3K          | 55 PRL ---Gab-2---> PI3K          | -280,63942 |
| 40 PDGF B ---> PAK-1              | 56 PDGF B ---> PAK-1              | -280,63942 |
| 41 SHP-2 ---> PRL                 | 50 SHP-2 ---> PRL                 | -280,63942 |
| 85 cyclosome regulatory netwo     | 45 cyclosome regulatory netwo     | 431,870017 |
| 147 BCR ---> cytoskeletal reorg   | 179 BCR ---> cytoskeletal reorg   | -234,92306 |
| 150 HIF-1alpha pathway            | 218 HIF-1alpha pathway            | -108,01139 |
| 58 GH pathway                     | 24 GH pathway                     | 923,902417 |
| 59 PDGF A ---> Crk                | 71 PDGF A ---> Crk                | -211,96757 |
| 60 GH ---> Grb-2                  | 25 GH ---> Grb-2                  | 923,902417 |
| 61 Epo ---> SHP-1                 | 70 Epo ---> SHP-1                 | -211,96757 |
| 169 OSM pathway                   | 207 OSM pathway                   | -187,41846 |
| 229 G1 phase (Cdk2)               | 229 G1 phase (Cdk2)               | 76,3767772 |
| 105 G-alpha-q ---> arachidonic a  | 122 G-alpha-q ---> arachidonic a  | -13,776248 |
| 106 fMLP ---> superoxide          | 123 fMLP ---> superoxide          | -13,776248 |
| 82 Src ---> Rap2B                 | 93 Src ---> Rap2B                 | -169,51428 |
| 83 insulin ---Jak1---> IRS-1, IR  | 92 insulin ---Jak1---> IRS-1, IR  | -169,51428 |
| 144 mTOR ----> S6, eIF-4E         | 170 mTOR ----> S6, eIF-4E         | -157,18199 |
| 112 cyclosome regulation          | 67 cyclosome regulation           | 228,621722 |
| 148 dsRNA ---> IKK-alpha:IKK      | 69 dsRNA ---> IKK-alpha:IKK       | 1135,41289 |
| 230 TNF-alpha pathway             | 189 TNF-alpha pathway             | 351,471944 |
| 102 Epo ---> PIP3                 | 113 Epo ---> PIP3                 | -139,44007 |
| 103 OSM ---> STAT1                | 117 OSM ---> STAT1                | -139,44007 |
| 159 PRL ---Src,FAK1---> ERK       | 188 PRL ---Src,FAK1---> ERK       | -129,65625 |
| 113 Caspase-9 ----> Caspases      | 130 Caspase-9 ----> Caspases      | -117,34786 |
| 114 Apaf-1 ---> Caspase-7         | 127 Apaf-1 ---> Caspase-7         | -117,34786 |
| 115 CD19 ----> PLCgamma2          | 131 CD19 ---> PLCgamma2           | -117,34786 |
| 116 PDK1 ---> 4E-BP1, p70S6K      | 128 PDK1 ---> 4E-BP1, p70S6K      | -117,34786 |
| 117 Apaf-1 ---> Caspase-3         | 129 Apaf-1 ---> Caspase-3         | -117,34786 |
| 193 dsRNA ----> p50:RelA          | 120 dsRNA ---> p50:RelA           | 626,776833 |
| 194 OSM ---> ERK                  | 234 OSM ---> ERK                  | -95,564343 |
| 130 PRL ---Fyn---> PI3K           | 150 PRL ---Fyn---> PI3K           | -103,2628  |
| 205 p73 pathway                   | 231 p73 pathway                   | 15,5522883 |
| 51 ErbB1 ---> endophilin 1        | 58 ErbB1 ---> endophilin 1        | -98,167357 |
| 52 MLK2 ---> JNK1                 | 59 MLK2 ---> JNK1                 | -98,167357 |
| 173 Plk1 activation and substrate | 147 Plk1 activation and substrate | 96,0216415 |
| 174 Plk1 cell cycle regulation    | 148 Plk1 cell cycle regulation    | 96,0216415 |
| 235 MHC class II ---> NF-AT       | 242 MHC class II ---> NF-AT       | 66,6732071 |
| 236 BCR ---> NF-AT                | 230 BCR ---> NF-AT                | 53,6013383 |
| 149 IFNalpha, IFNbeta ---> PI3K   | 118 IFNalpha, IFNbeta ---> PI3K   | 206,842176 |
| 164 G2/M phase (cyclin A:Cdk1     | 185 G2/M phase (cyclin A:Cdk1     | -69,325076 |
| 165 LAT ---> MLC                  | 184 LAT ---> MLC                  | -69,325076 |
| 166 LAT ---> cofilin              | 186 LAT ---> cofilin              | -69,325076 |
| 167 MHC class I ---> LAT          | 187 MHC class I ---> LAT          | -69,325076 |
| 69 TAK1 ---> c-Jun                | 82 TAK1 ---> c-Jun                | -73,982961 |
| 70 MEKK2 ---MKK7---> JNK          | 75 MEKK2 ---MKK7---> JNK          | -73,982961 |
| 71 MEKK2 ---> ATF-2               | 77 MEKK2 ---> ATF-2               | -73,982961 |
| 72 Epo ---Lyn---> STAT5A          | 83 Epo ---Lyn---> STAT5A          | -73,982961 |



|                                 |                                 |            |
|---------------------------------|---------------------------------|------------|
| 73 MEKK2 ---> ATF-2             | 85 MEKK2 ---> ATF-2             | -73,982961 |
| 74 GCK ---> MKK4                | 78 GCK ---> MKK4                | -73,982961 |
| 75 PDGF A ---> SHP-2            | 79 PDGF A ---> SHP-2            | -73,982961 |
| 76 MKK4 ---> c-Jun              | 80 MKK4 ---> c-Jun              | -73,982961 |
| 77 PDGF B ---> PKR              | 81 PDGF B ---> PKR              | -73,982961 |
| 78 ASK1 ---> p38alpha           | 86 ASK1 ---> p38alpha           | -73,982961 |
| 219 insulin ---Shc---> MAPK ca  | 195 insulin ---Shc---> MAPK ca  | 53,1387324 |
| 171 insulin ---IRS---> PRK2, SF | 205 insulin ---IRS---> PRK2, SF | -62,470105 |
| 172 VEGF-A ---> NO              | 204 VEGF-A ---> NO              | -62,470105 |
| 195 Htt pathway                 | 169 Htt pathway                 | 63,2113627 |
| 187 VEGF-A ---/ Caspase-9, Bax  | 219 VEGF-A ---/ Caspase-9, Bax  | -58,750655 |
| 92 MKP-5 ---/ p53; MKK4 --->    | 102 MKP-5 ---/ p53; MKK4 --->   | -60,724239 |
| 93 PDGF B ---> Src              | 105 PDGF B ---> Src             | -60,724239 |
| 94 LMW-PTP ---/ VEGFR-1         | 106 LMW-PTP ---/ VEGFR-1        | -60,724239 |
| 95 PDGF A ---> Src              | 107 PDGF A ---> Src             | -60,724239 |
| 96 SHP-1 ---/ ErbB1             | 108 SHP-1 ---/ ErbB1            | -60,724239 |
| 97 CD148 ---/ PDGFRbeta         | 109 CD148 ---/ PDGFRbeta        | -60,724239 |
| 98 PRL ---Jak2---> STAT5A       | 110 PRL ---Jak2---> STAT5A      | -60,724239 |
| 99 PKCdelta ---> GRK2           | 36 PKCdelta ---> GRK2           | 418,401495 |
| 100 VEGF-A ---> STAT1alpha      | 103 VEGF-A ---> STAT1alpha      | -60,724239 |
| 101 PRL ---> Jak2               | 104 PRL ---> Jak2               | -60,724239 |
| 207 PDGF A ---> ERK             | 240 PDGF A ---> ERK             | -48,266372 |
| 208 PDGF B ---> ERK             | 241 PDGF B ---> ERK             | -48,266372 |
| 215 BCR ---> ERK                | 252 BCR ---> ERK                | -41,877796 |
| 119 EDAR ---> TRAF2             | 140 EDAR ---> TRAF2             | -48,685582 |
| 120 Smac ---/ cIAP-2            | 133 Smac ---/ cIAP-2            | -48,685582 |
| 121 PRL ---Src---> STAT5B       | 134 PRL ---Src---> STAT5B       | -48,685582 |
| 122 ASK1 ---MKK4---> JNK1       | 53 ASK1 ---MKK4---> JNK1        | 303,64129  |
| 123 Smac ---> Caspase-3         | 135 Smac ---> Caspase-3         | -48,685582 |
| 124 PTEN ---/ AKT-1             | 136 PTEN ---/ AKT-1             | -48,685582 |
| 125 Epo ---> STAT5              | 138 Epo ---> STAT5              | -48,685582 |
| 126 Smac ---/ cIAP-1            | 139 Smac ---/ cIAP-1            | -48,685582 |
| 213 VEGF-A ---> PLA2            | 247 VEGF-A ---> PLA2            | 7,56272533 |
| 131 Nod1 ---> Caspase-9         | 165 Nod1 ---> Caspase-9         | -41,446066 |
| 132 JLP ---> JNK1               | 166 JLP ---> JNK1               | -41,446066 |
| 133 PDGF B ---> STATs           | 163 PDGF B ---> STATs           | -41,446066 |
| 134 JNK1 ---> Bax               | 164 JNK1 ---> Bax               | -41,446066 |
| 220 TNF-alpha ---> NFkappaB     | 253 TNF-alpha ---> NFkappaB     | 7,80304799 |
| 175 TBK1:TRIF:IKK-i ---> p50:   | 216 TBK1:TRIF:IKK-i ---> p50    | 5,04204197 |
| 146 JNK1 ---> MKK4              | 91 JNK1 ---> MKK4               | 185,009376 |
| 161 PDGF B ---SHP-2---> Ras; 1  | 112 PDGF B ---SHP-2---> Ras;    | 151,605852 |
| 162 SLP-65 ---/ Raf-1           | 181 SLP-65 ---/ Raf-1           | -33,07013  |
| 163 PDGF B---/ Ras              | 116 PDGF B---/ Ras              | 151,605852 |
| 188 VEGF-A ---> NF-ATc          | 168 VEGF-A ---> NF-ATc          | 28,6973885 |

|                                 |                                 |            |
|---------------------------------|---------------------------------|------------|
| 176 Fer ---> beta-catenin{ Tyr1 | 197 Fer ---> beta-catenin{ Tyr1 | -28,869757 |
| 177 PDGF A ---> AKT-1           | 198 PDGF A ---> AKT-1           | -28,869757 |
| 178 IFNalpha, IFNbeta ---> STA  | 126 IFNalpha, IFNbeta ---> ST/  | 128,596884 |
| 179 OSM ---> STAT3              | 199 OSM ---> STAT3              | -28,869757 |
| 180 PDGF B ---> AKT-1           | 200 PDGF B ---> AKT-1           | -28,869757 |
| 181 Src ---/ RhoA               | 132 Src ---/ RhoA               | 128,596884 |
| 190 Src ---> Rac1               | 227 Src ---> Rac1               | -26,246512 |
| 191 Rac1 ---> c-Jun, Elk-1      | 228 Rac1 ---> c-Jun, Elk-1      | -26,246512 |
| 192 LAT ---> PKCtheta           | 73 LAT ---> PKCtheta            | 519,433446 |
| 233 ZAP-70 ---> Elk-1           | 232 ZAP-70 ---> Elk-1           | 15,4437971 |
| 234 AKT, MAPKAPK2 ---/ tube     | 233 AKT, MAPKAPK2 ---/ tubi     | 15,4437971 |
| 204 Csk, CD45 ---> Lck          | 236 Csk, CD45 ---> Lck          | -24,068509 |
| 211 Csk, CD45 ---> Fyn          | 244 Csk, CD45 ---> Fyn          | -23,149229 |
| 214 LAT ---> Ras                | 183 LAT ---> Ras                | 74,8558722 |
| 224 IFNalpha, IFNbeta ---> STA  | 203 IFNalpha, IFNbeta ---> ST/  | 69,0783454 |
| 231 IL-12 - STAT4 pathway       | 220 IL-12 - STAT4 pathway       | 61,7623103 |
| 232 IL-12 ---> STAT4            | 221 IL-12 ---> STAT4            | 61,7623103 |
| 246 beta-catenin network        | 235 beta-catenin network        | 57,6195628 |
| 221 PDGF A ---> DAG, IP3        | 209 PDGF A ---> DAG, IP3        | 9,47110645 |
| 222 PDGF B --> DAG, IP3         | 212 PDGF B --> DAG, IP3         | 9,47110645 |
| 223 PI3K ---/ p53               | 213 PI3K ---/ p53               | 9,47110645 |
| 118 MKK6 ---> Hsp27             | 121 MKK6 ---> Hsp27             | -14,146139 |
| 136 MEK-1 ---> HIF-1alpha       | 154 MEK-1 ---> HIF-1alpha       | -11,966331 |
| 137 p38alpha ---> CREB          | 155 p38alpha ---> CREB          | -11,966331 |
| 138 MLK2 ---MKK6---> p38alp     | 159 MLK2 ---MKK6---> p38alp     | -11,966331 |
| 139 MKK4 ---/ RXR-alpha         | 156 MKK4 ---/ RXR-alpha         | -11,966331 |
| 140 TAK1 ---> p38alpha          | 160 TAK1 ---> p38alpha          | -11,966331 |
| 141 MEKK4 ---> JNK1             | 161 MEKK4 ---> JNK1             | -11,966331 |
| 142 MLK2 ---MKK3---> p38alp     | 157 MLK2 ---MKK3---> p38alp     | -11,966331 |
| 143 ATM ---> p53                | 162 ATM ---> p53                | -11,966331 |
| 237 IL-4 ---> STAT6             | 97 IL-4 ---> STAT6              | 494,973343 |
| 238 phosphorylation and ubiquit | 238 phosphorylation and ubiquit | 4,87565063 |
| 239 IL-4 - STAT6 pathway        | 96 IL-4 - STAT6 pathway         | 494,973343 |
| 151 MEKK3 ---> ATF-2            | 171 MEKK3 ---> ATF-2            | -10,564244 |
| 152 p38alpha ---> STAT3         | 173 p38alpha ---> STAT3         | -10,564244 |
| 153 JNK2 ---> doublecortin      | 174 JNK2 ---> doublecortin      | -10,564244 |
| 154 Abl ---> p73alpha           | 76 Abl ---> p73alpha            | 120,933048 |
| 155 MKK7 ---> c-Jun             | 172 MKK7 ---> c-Jun             | -10,564244 |
| 156 PP2Calpha ---/ MKK4         | 175 PP2Calpha ---/ MKK4         | -10,564244 |
| 157 PP2Calpha ---/ MKK6         | 176 PP2Calpha ---/ MKK6         | -10,564244 |
| 158 Caspase-6 ---> Caspase-3    | 84 Caspase-6 ---> Caspase-3     | 120,933048 |
| 182 Fas ---/ SRF                | 191 Fas ---/ SRF                | -9,5268572 |
| 183 Fas ---/ NuMA               | 192 Fas ---/ NuMA               | -9,5268572 |
| 184 Unc18-1 ---/ PLD2           | 193 Unc18-1 ---/ PLD2           | -9,5268572 |

|                                  |                                 |            |
|----------------------------------|---------------------------------|------------|
| 185 EGF ---> N-WASP              | 190 EGF ---> N-WASP             | -9,5268572 |
| 186 Rac1 ---> p38                | 194 Rac1 ---> p38               | -9,5268572 |
| 197 E1 ---/ cyclin E             | 222 E1 ---/ cyclin E            | -8,7355419 |
| 198 Rac1 ---> golgin-160         | 223 Rac1 ---> golgin-160        | -8,7355419 |
| 199 MKK4 ---/ PPAR-gamma         | 224 MKK4 ---/ PPAR-gamma        | -8,7355419 |
| 200 TPO ---> STAT3               | 141 TPO ---> STAT3              | 78,5816708 |
| 201 TPO pathway                  | 137 TPO pathway                 | 78,5816708 |
| 202 PDGF B ---> cortactin        | 225 PDGF B ---> cortactin       | -8,7355419 |
| 210 POSH ---> JNK1, JNK2         | 239 POSH ---> JNK1, JNK2        | -8,5299793 |
| 247 activin A ---> Smad2         | 245 activin A ---> Smad2        | 3,3205128  |
| 248 activin A ---> Smad3         | 246 activin A ---> Smad3        | 3,3205128  |
| 249 EGF ---> DAG, IP3            | 226 EGF ---> DAG, IP3           | 43,7877239 |
| 240 EGF ---> PLD2                | 258 EGF ---> PLD2               | -3,5193563 |
| 241 Eps15 ---> ErbB internalizat | 260 Eps15 ---> ErbB internaliza | -3,5193563 |
| 242 Fam ---> beta-catenin        | 254 Fam ---> beta-catenin       | -3,5193563 |
| 243 FasL ---> Caspase-3          | 255 FasL ---> Caspase-3         | -3,5193563 |
| 244 CHIP ---/ Pael-R             | 201 CHIP ---/ Pael-R            | 47,3916925 |
| 245 IL-8 ---> ERK2               | 257 IL-8 ---> ERK2              | -3,5193563 |
| 216 Rac1 ---MLK3---> c-Jun       | 248 Rac1 ---MLK3---> c-Jun      | -7,6994168 |
| 217 CXCR1 internalization via c  | 251 CXCR1 internalization via c | -7,6994168 |
| 218 HB-EGF ---> PI3K             | 249 HB-EGF ---> PI3K            | -7,6994168 |
| 225 Apo2L ---Caspase-8---> Cas   | 262 Apo2L ---Caspase-8---> Ca   | -9,434769  |
| 226 IL-2 ---> STAT5              | 114 IL-2 ---> STAT5             | 236,871113 |
| 227 c-Kit pathway                | 182 c-Kit pathway               | 52,1951315 |
| 228 IL-2 - STAT5 pathway         | 115 IL-2 - STAT5 pathway        | 236,871113 |
|                                  |                                 | 81938,3084 |

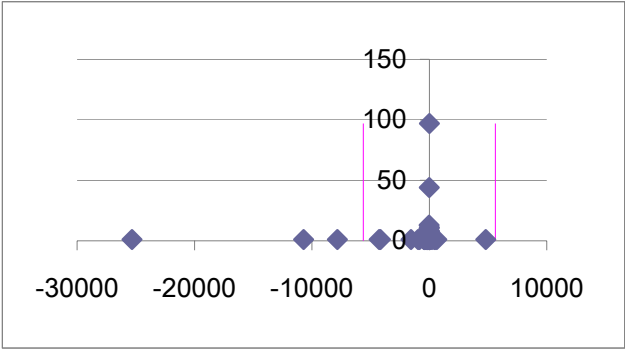

Supplement: M800274-MCP200_4.pdf [file M800274-MCP200_4.pdf]
