# Supplementary material
Source: PubMed Central journal article supplement (PMC2689776)
Supplement: M800274-MCP200_2.pdf [file M800274-MCP200_2.pdf]

C1 L1

| Name of protein                                                  | Id          | abundance | abundance |
|------------------------------------------------------------------|-------------|-----------|-----------|
| Major vault protein                                              | IPI00000105 | 356393    | 1607060   |
| 14-3-3 protein epsilon                                           | IPI00000816 | 306669    | 1165936   |
| Isoform 1 of LIM and SH3 domain protein 1                        | IPI00000861 | 138618    | 22570     |
| Valyl-tRNA synthetase                                            | IPI00000873 | 227341    | 264899    |
| Peroxiredoxin-1                                                  | IPI00000874 | 2082379   | 5494389   |
| Elongation factor 1-gamma                                        | IPI00000875 | 788705    | 3006532   |
| Mitochondrial import inner membrane translocase subunit Tim13    | IPI00001589 | 274943    | 151110    |
| Importin beta-1 subunit                                          | IPI00001639 | 1376591   | 2640838   |
| Isoform 1 of RNA-binding protein 8A                              | IPI00001757 | 77191     | 7725      |
| Chloride intracellular channel protein 4                         | IPI00001960 | 163196    | 811267    |
| Serine hydroxymethyltransferase, mitochondrial precursor         | IPI00002520 | 358567    | 252896    |
| 60S ribosomal protein L14                                        | IPI00002821 | 158561    | 93374     |
| Heat shock 70 kDa protein 4                                      | IPI00002966 | 3418415   | 5561960   |
| Guanine nucleotide-binding protein G(I)/G(S)/G(T) subunit beta 2 | IPI00003348 | 17477     | 160904    |
| HSPA5 protein                                                    | IPI00003362 | 4800506   | 7023888   |
| Isoform 1 of Splicing factor, arginine/serine-rich 7             | IPI00003377 | 552327    | 15319     |
| Drebrin                                                          | IPI00003406 | 93939     | 10423     |
| Rho GDP-dissociation inhibitor 1                                 | IPI00003815 | 89155     | 122417    |
| Isoform 1 of Heat shock cognate 71 kDa protein                   | IPI00003865 | 10291788  | 10566275  |
| 60S ribosomal protein L4                                         | IPI00003918 | 94408     | 1033204   |
| Histone H2B type 2-E                                             | IPI00003935 | 396984    | 126463    |
| Ubiquitin-conjugating enzyme E2 N                                | IPI00003949 | 163873    | 16509     |
| Glycogen phosphorylase, brain form                               | IPI00004358 | 213539    | 1368686   |
| LYSOSOMAL-ASSOCIATED M                                           | IPI00004503 | 8624      | 94856     |
| Beta-2-microglobulin precursor                                   | IPI00004656 | 934799    | 12590     |
| FACT complex subunit SSRP1                                       | IPI00005154 | 53402     | 267324    |
| Lon protease homolog, mitochondrial precursor                    | IPI00005158 | 371617    | 844902    |
| Actin-related protein 2/3 complex subunit 2                      | IPI00005161 | 62157     | 7811      |
| Interleukin enhancer-binding factor 2                            | IPI00005198 | 465110    | 256360    |
| Membrane-associated progesterone receptor component 2            | IPI00005202 | 66018     | 109821    |
| 39S ribosomal protein L12, mitochondrial precursor               | IPI00005537 | 197227    | 321434    |

|                                                                          |             |         |         |
|--------------------------------------------------------------------------|-------------|---------|---------|
| Isoform Long of Spectrin beta chain, brain 1                             | IPI00005614 | 120592  | 244603  |
| RAB1A, member RAS oncogene family                                        | IPI00005719 | 192934  | 1943552 |
| SPLICING FACTOR, ARGININE                                                | IPI00005978 | 447746  | 508158  |
| Prefoldin subunit 2                                                      | IPI00006052 | 497056  | 20165   |
| VAMP-associated protein B/C                                              | IPI00006211 | 131337  | 53792   |
| GUANINE NUCLEOTIDE-BIND                                                  | IPI00006395 | 268699  | 280450  |
| Vesicle-trafficking protein SEC22b                                       | IPI00006865 | 142204  | 41869   |
| EUKARYOTIC TRANSLATION                                                   | IPI00006935 | 448840  | 86877   |
| Tyrosyl-tRNA synthetase, cytoplasmic                                     | IPI00007074 | 175242  | 49053   |
| ADP/ATP translocase 2                                                    | IPI00007188 | 833990  | 441180  |
| 120 kDa protein                                                          | IPI00007402 | 75492   | 31384   |
| ATP synthase O subunit, mitochondrial precursor                          | IPI00007611 | 5382    | 271202  |
| Tubulin beta-2C chain                                                    | IPI00007752 | 666540  | 1006410 |
| Stress-70 protein, mitochondrial precursor                               | IPI00007765 | 3898457 | 2530448 |
| Methionyl-tRNA synthetase, cytoplasmic                                   | IPI00008240 | 139231  | 173199  |
| Adenylyl cyclase-associated protein 1                                    | IPI00008274 | 484859  | 1209798 |
| 40S ribosomal protein S5                                                 | IPI00008433 | 1363228 | 5315215 |
| 40S ribosomal protein S10                                                | IPI00008438 | 164464  | 150760  |
| Intercellular adhesion molecule 1 precursor                              | IPI00008494 | 415878  | 123009  |
| 60S acidic ribosomal protein P1                                          | IPI00008527 | 1907605 | 2382557 |
| 60S acidic ribosomal protein P2                                          | IPI00008529 | 3854934 | 5013619 |
| 60S acidic ribosomal protein P0                                          | IPI00008530 | 1134989 | 1541421 |
| Thioredoxin-like protein 2                                               | IPI00008552 | 437320  | 730567  |
| Isoform Beta of LIM domain and actin-binding protein 1                   | IPI00008918 | 20924   | 11692   |
| Isoform LAMP-2A of Lysosome-associated membrane glycoprotein 2 precursor | IPI00009030 | 207220  | 98557   |
| Lupus La protein                                                         | IPI00009032 | 295206  | 282376  |
| Isoform 3 of FUS-interacting serine-arginine-rich protein 1              | IPI00009071 | 273669  | 999702  |
| RuvB-like 2                                                              | IPI00009104 | 125825  | 219577  |
| caveolin 1                                                               | IPI00009236 | 87714   | 934819  |
| Glucosamine-6-phosphate isomerase                                        | IPI00009305 | 86376   | 218218  |
| Ras GTPase-activating-like protein IQGAP1                                | IPI00009342 | 759536  | 2047978 |
| Sulfide:quinone oxidoreductase, mitochondrial precursor                  | IPI00009634 | 467661  | 158934  |

|                                                                       |             |         |          |
|-----------------------------------------------------------------------|-------------|---------|----------|
| 6-phosphofructokinase type C                                          | IPI00009790 | 444429  | 755728   |
| Keratin, type I cytoskeletal 10                                       | IPI00009865 | 251241  | 80446    |
| Protein disulfide-isomerase A4 precursor                              | IPI00009904 | 592203  | 1487188  |
| Eukaryotic translation initiation factor 6                            | IPI00010105 | 101568  | 36229    |
| 60S ribosomal protein L23                                             | IPI00010153 | 224169  | 465868   |
| Rab GDP dissociation inhibitor alpha                                  | IPI00010154 | 116867  | 443333   |
| S-adenosylmethionine synthetase isoform type-2                        | IPI00010157 | 173830  | 32980    |
| diazepam binding inhibitor isoform 3                                  | IPI00010182 | 99519   | 100551   |
| Hypothetical protein                                                  | IPI00010402 | 259710  | 322776   |
| T-complex protein 1 subunit epsilon                                   | IPI00010720 | 1237415 | 911184   |
| Isoform Long of Splicing factor, proline- and glutamine-rich          | IPI00010740 | 362821  | 887209   |
| Tropomyosin 4                                                         | IPI00010779 | 612212  | 2415642  |
| Protein disulfide-isomerase precursor                                 | IPI00010796 | 444720  | 920018   |
| Electron transfer flavoprotein subunit alpha, mitochondrial precursor | IPI00010810 | 469199  | 542378   |
| Chloride intracellular channel protein 1                              | IPI00010896 | 1312101 | 1649350  |
| D-3-phosphoglycerate dehydrogenase                                    | IPI00011200 | 298052  | 465549   |
| NAD-dependent malic enzyme, mitochondrial precursor                   | IPI00011201 | 134362  | 18110    |
| 40S ribosomal protein S3                                              | IPI00011253 | 1035686 | 996152   |
| heterogeneous nuclear ribonucleoprotein D-like                        | IPI00011274 | 1192108 | 1036423  |
| Isoform 2 of Neutral alpha-glucosidase AB precursor                   | IPI00011454 | 114921  | 198954   |
| Tubulin beta chain                                                    | IPI00011654 | 8188917 | 14146703 |
| Adenosylhomocysteinase                                                | IPI00012007 | 49250   | 68790    |
| Cofilin-1                                                             | IPI00012011 | 3822423 | 4463812  |
| poly(rC)-binding protein 2 isoform b                                  | IPI00012066 | 820705  | 966692   |
| Heterogeneous nuclear ribonucleoprotein R                             | IPI00012074 | 204169  | 465929   |
| EUKARYOTIC TRANSLATION                                                | IPI00012079 | 12392   | 305264   |
| N-acetylglucosamine-6-sulfatase precursor                             | IPI00012102 | 97415   | 285161   |
| Isoform SRP55-1 of Splicing factor, arginine/serine-rich 6            | IPI00012345 | 153790  | 7394     |
| Isoform Sap-mu-0 of Proactivator polypeptide precursor                | IPI00012503 | 561186  | 4477580  |
| 40S ribosomal protein S25                                             | IPI00012750 | 322299  | 235659   |
| Hsp90 co-chaperone Cdc37                                              | IPI00013122 | 85619   | 1588919  |

|                                                                                |             |         |         |
|--------------------------------------------------------------------------------|-------------|---------|---------|
| 40S ribosomal protein S18                                                      | IPI00013296 | 213654  | 49343   |
| 28 kDa heat- and acid-stable phosphoprotein                                    | IPI00013297 | 60458   | 276699  |
| 40S ribosomal protein S7                                                       | IPI00013415 | 1976549 | 5281143 |
| glutamyl-prolyl tRNA synthetase                                                | IPI00013452 | 143001  | 106659  |
| 40S RIBOSOMAL PROTEIN S2                                                       | IPI00013485 | 1555102 | 886531  |
| Alpha-actinin-1                                                                | IPI00013508 | 4994296 | 5127928 |
| Alpha-actinin-4                                                                | IPI00013808 | 993368  | 1873746 |
| Isoform 1 of Heterogeneous nuclear ribonucleoprotein H3                        | IPI00013877 | 491467  | 1323134 |
| heterogeneous nuclear ribonucleoprotein H1                                     | IPI00013881 | 1910527 | 3743011 |
| Stress-induced-phosphoprotein 1                                                | IPI00013894 | 613951  | 6411780 |
| Protein S100-A11                                                               | IPI00013895 | 336832  | 758020  |
| Septin-2                                                                       | IPI00014177 | 396477  | 847754  |
| Complement component 1 Q subcomponent-binding protein, mitochondrial precursor | IPI00014230 | 234798  | 2271652 |
| Lysyl-tRNA synthetase                                                          | IPI00014238 | 169534  | 361562  |
| eukaryotic translation initiation factor 4H isoform 1                          | IPI00014263 | 17024   | 513501  |
| Elongation factor 1-alpha 2                                                    | IPI00014424 | 124118  | 138477  |
| ISOFORM 1 OF DYNEIN HEAVY                                                      | IPI00014845 | 30984   | 64715   |
| Nuclear protein Hcc-1                                                          | IPI00014938 | 112985  | 269563  |
| Prostaglandin E synthase 3                                                     | IPI00015029 | 832174  | 871931  |
| Eukaryotic translation initiation factor 1                                     | IPI00015077 | 43969   | 604755  |
| Ras-related protein Rap-1b precursor                                           | IPI00015148 | 374073  | 339829  |
| Calponin-2                                                                     | IPI00015262 | 548280  | 1008257 |
| Prefoldin subunit 5                                                            | IPI00015361 | 408132  | 616520  |
| tubulin, alpha-like 3                                                          | IPI00015671 | 233648  | 181715  |
| Reticulocalbin-1 precursor                                                     | IPI00015842 | 132503  | 917033  |
| Prefoldin subunit 4                                                            | IPI00015891 | 12309   | 167477  |
| Dihydrolipoyl dehydrogenase, mitochondrial precursor                           | IPI00015911 | 214598  | 654115  |
| Isoform 1 of Nucleolar RNA helicase 2                                          | IPI00015953 | 139982  | 559902  |
| RAS-RELATED PROTEIN RAE1                                                       | IPI00016339 | 203349  | 59056   |
| Ras-related protein Rab-7                                                      | IPI00016342 | 91318   | 314483  |
| Poly(rC)-binding protein 1                                                     | IPI00016610 | 939267  | 1148852 |
| Matrin-3                                                                       | IPI00017297 | 509695  | 998788  |
| Prohibitin                                                                     | IPI00017334 | 2295393 | 2188814 |
| 40S ribosomal protein S21                                                      | IPI00017448 | 350639  | 188242  |
| Microtubule-associated protein RP/EB family member 1                           | IPI00017596 | 225898  | 285789  |
| Probable ATP-dependent RNA helicase DDX5                                       | IPI00017617 | 607378  | 340301  |

|                                                                                      |             |          |          |
|--------------------------------------------------------------------------------------|-------------|----------|----------|
| CDNA FLJ25678 fis, clone TST04067, highly similar to PURINE NUCLEOSIDE PHOSPHORYLASE | IPI00017672 | 162804   | 493602   |
| Coactosin-like protein                                                               | IPI00017704 | 6832     | 151045   |
| hydroxysteroid (17-beta) dehydrogenase 10 isoform 1                                  | IPI00017726 | 129065   | 151427   |
| Aconitate hydratase, mitochondrial precursor                                         | IPI00017855 | 183695   | 107688   |
| Small nuclear ribonucleoprotein Sm D3                                                | IPI00017964 | 349449   | 78086    |
| 14-3-3 protein theta                                                                 | IPI00018146 | 1936373  | 4309446  |
| Aspartate aminotransferase, mitochondrial precursor                                  | IPI00018206 | 522083   | 369611   |
| 26S protease regulatory subunit 6A                                                   | IPI00018398 | 12376    | 78511    |
| COPINE I                                                                             | IPI00018452 | 28659    | 126401   |
| T-complex protein 1 subunit eta                                                      | IPI00018465 | 322273   | 357178   |
| Isoform 1 of Protein arginine N-methyltransferase 1                                  | IPI00018522 | 145902   | 462853   |
| Histone H2B type 1-L                                                                 | IPI00018534 | 7537726  | 3585369  |
| Myosin-9                                                                             | IPI00019502 | 1737728  | 7078871  |
| Glutathione transferase omega-1                                                      | IPI00019755 | 28483    | 524931   |
| ubiquitin-like protein fubi and ribosomal protein S30 precursor                      | IPI00019770 | 482710   | 608095   |
| Isoform 1 of 26S protease regulatory subunit 6B                                      | IPI00020042 | 84866    | 751183   |
| H2B histone family, member A                                                         | IPI00020101 | 4670620  | 11432266 |
| Isoform Short of TATA-binding protein-associated factor 2N                           | IPI00020194 | 46204    | 411663   |
| Calreticulin precursor                                                               | IPI00020599 | 6615     | 120677   |
| Hepatoma-derived growth factor                                                       | IPI00020956 | 231226   | 78581    |
| Calnexin precursor                                                                   | IPI00020984 | 763141   | 1837698  |
| Isoform 1 of RuvB-like 1                                                             | IPI00021187 | 69270    | 43996    |
| 14-3-3 protein zeta/delta                                                            | IPI00021263 | 1471499  | 7427984  |
| ATP-citrate synthase                                                                 | IPI00021290 | 77230    | 887209   |
| Ubiquitin-conjugating enzyme E2 L3                                                   | IPI00021347 | 614307   | 1482396  |
| Isoform A of Lamin-A/C                                                               | IPI00021405 | 4935435  | 6422696  |
| Actin, alpha skeletal muscle                                                         | IPI00021428 | 849973   | 5742926  |
| Actin, cytoplasmic 1                                                                 | IPI00021439 | 34020266 | 20163120 |
| Isoform 1 of Reticulon-4                                                             | IPI00021766 | 26426    | 674480   |
| NEUROBLAST DIFFERENTIATION FACTOR 1                                                  | IPI00021812 | 55348    | 1192050  |
| Cystatin B                                                                           | IPI00021828 | 136180   | 435533   |
| cAMP-dependent protein kinase type I-alpha regulatory subunit                        | IPI00021831 | 11912    | 181376   |
| 40S ribosomal protein S6                                                             | IPI00021840 | 126518   | 13857    |

|                                                                       |             |         |         |
|-----------------------------------------------------------------------|-------------|---------|---------|
| 26S protease regulatory subunit S10B                                  | IPI00021926 | 102296  | 83138   |
| Superoxide dismutase [Mn], mitochondrial precursor                    | IPI00022314 | 201345  | 219729  |
| Acyl carrier protein, mitochondrial precursor                         | IPI00022442 | 62501   | 19793   |
| Isoform 1 of Exportin-2                                               | IPI00022744 | 31610   | 783939  |
| Transitional endoplasmic reticulum ATPase                             | IPI00022774 | 1244802 | 2899246 |
| Trifunctional enzyme beta subunit, mitochondrial precursor            | IPI00022793 | 302992  | 667336  |
| Elongation factor 1-delta                                             | IPI00023048 | 808331  | 2655588 |
| Ubiquitin-like 1-activating enzyme E1B                                | IPI00023234 | 0       | 251944  |
| Nascent polypeptide-associated complex subunit alpha                  | IPI00023748 | 484488  | 853796  |
| Nucleosome assembly protein 1-like 1                                  | IPI00023860 | 939598  | 702422  |
| clathrin heavy chain 1                                                | IPI00024067 | 3029411 | 6112295 |
| Isoform 1 of Voltage-dependent anion-selective channel protein 2      | IPI00024145 | 797312  | 1021129 |
| Isoform 1 of Proteasome subunit alpha type 7                          | IPI00024175 | 328832  | 614665  |
| Transportin 1 (Importin beta-2)                                       | IPI00024364 | 316450  | 690706  |
| Copine-3                                                              | IPI00024403 | 50033   | 102348  |
| Isoform Long of Ubiquitin carboxyl-terminal hydrolase 5               | IPI00024664 | 346046  | 922492  |
| Endoplasmic reticulum protein ERp29 precursor                         | IPI00024911 | 86542   | 5571    |
| Isoform Mitochondrial of Peroxiredoxin-5, mitochondrial precursor     | IPI00024915 | 585893  | 1285469 |
| Thioredoxin-dependent peroxide reductase, mitochondrial precursor     | IPI00024919 | 200562  | 89321   |
| ATP SYNTHASE SUBUNIT DE                                               | IPI00024920 | 0       | 122431  |
| 60S ribosomal protein L12                                             | IPI00024933 | 896408  | 1936797 |
| Enoyl-CoA hydratase, mitochondrial precursor                          | IPI00024993 | 583010  | 1188225 |
| Proteasome subunit beta type 1 precursor                              | IPI00025019 | 210242  | 153731  |
| Protein disulfide-isomerase A3 precursor                              | IPI00025252 | 2769742 | 1985659 |
| Isoform Long of Trifunctional purine biosynthetic protein adenosine-3 | IPI00025273 | 65252   | 177950  |
| Citrate synthase, mitochondrial precursor                             | IPI00025366 | 63226   | 494237  |
| Eukaryotic initiation factor 4A-I                                     | IPI00025491 | 384068  | 430324  |

|                                                                                         |             |         |          |
|-----------------------------------------------------------------------------------------|-------------|---------|----------|
| Heat-shock protein beta-1                                                               | IPI00025512 | 2243007 | 3518277  |
| Acidic leucine-rich nuclear phosphoprotein 32 family member A                           | IPI00025849 | 822818  | 1265016  |
| Barrier-to-autointegration factor                                                       | IPI00026087 | 553903  | 971615   |
| Glucosidase 2 subunit beta precursor                                                    | IPI00026154 | 761155  | 94403    |
| NHP2-like protein 1                                                                     | IPI00026167 | 191482  | 43105    |
| Isoform 1 of F-actin capping protein subunit beta                                       | IPI00026185 | 54051   | 22639    |
| 60S ribosomal protein L18a                                                              | IPI00026202 | 162596  | 414557   |
| Puromycin-sensitive aminopeptidase                                                      | IPI00026216 | 65662   | 126967   |
| HISTONE H2A TYPE 1-B                                                                    | IPI00026272 | 9107951 | 24604795 |
| 60S ribosomal protein L31                                                               | IPI00026302 | 369447  | 43049    |
| THIOREDOXIN DOMAIN-CONTAINING                                                           | IPI00026328 | 166930  | 189482   |
| ATLASTIN-1                                                                              | IPI00026329 | 268279  | 362581   |
| Cytochrome c oxidase polypeptide VIIa-liver/heart, mitochondrial precursor              | IPI00026570 | 130294  | 263688   |
| Fatty acid synthase                                                                     | IPI00026781 | 128025  | 1368145  |
| CYTOCHROME B-C1 COMPLEX                                                                 | IPI00026964 | 50322   | 30400    |
| FACT complex subunit SPT16                                                              | IPI00026970 | 0       | 275783   |
| Tu translation elongation factor, mitochondrial                                         | IPI00027107 | 562906  | 1540930  |
| ISOCITRATE DEHYDROGENASE                                                                | IPI00027223 | 127944  | 146657   |
| Endoplasmic precursor                                                                   | IPI00027230 | 854843  | 3717646  |
| Prohibitin-2                                                                            | IPI00027252 | 121532  | 277531   |
| Isoform 1 of Hematological and neurological expressed 1-like protein                    | IPI00027397 | 62029   | 262040   |
| Alanyl-tRNA synthetase, cytoplasmic                                                     | IPI00027442 | 121852  | 1032693  |
| T-complex protein 1 subunit zeta                                                        | IPI00027626 | 292671  | 1251468  |
| Proteasome subunit beta type 3                                                          | IPI00028004 | 135845  | 296227   |
| ISOFORM 1 OF VERY LONG-CHAIN                                                            | IPI00028031 | 97806   | 41811    |
| Actin-like protein 3                                                                    | IPI00028091 | 601278  | 2487643  |
| Dpy-30-like protein                                                                     | IPI00028109 | 70969   | 115217   |
| Dolichyl-diphosphooligosaccharide--protein glycosyltransferase 63 kDa subunit precursor | IPI00028635 | 34743   | 326023   |
| Isoform 1 of Heterogeneous nuclear ribonucleoprotein D0                                 | IPI00028888 | 1309963 | 1610467  |
| Alpha-centractin                                                                        | IPI00029468 | 161945  | 609357   |
| Src substrate cortactin                                                                 | IPI00029601 | 131983  | 77882    |
| Proteasome subunit alpha type 6                                                         | IPI00029623 | 140185  | 17994    |
| Single-stranded DNA-binding protein, mitochondrial precursor                            | IPI00029744 | 32301   | 270443   |

|                                                                       |             |        |         |
|-----------------------------------------------------------------------|-------------|--------|---------|
| Isoform 1 of 40S ribosomal protein S24                                | IPI00029750 | 4178   | 220892  |
| Proteasome activator complex subunit 1                                | IPI00030154 | 153472 | 12044   |
| 60S ribosomal protein L7                                              | IPI00030179 | 634821 | 680270  |
| PROCOLLAGEN-LYSINE,2-O>                                               | IPI00030255 | 42539  | 95198   |
| Adipocyte plasma membrane-associated protein                          | IPI00031131 | 22018  | 35554   |
| Ras-related protein Rab-2A                                            | IPI00031169 | 63977  | 66294   |
| Rab GDP dissociation inhibitor beta                                   | IPI00031461 | 309702 | 542893  |
| Trifunctional enzyme subunit alpha, mitochondrial precursor           | IPI00031522 | 411256 | 449144  |
| Splicing factor U2AF 65 kDa subunit                                   | IPI00031556 | 153126 | 119000  |
| <a href="#">PROTEIN NOXP20</a>                                        | IPI00031670 | 152046 | 221479  |
| 60S ribosomal protein L9                                              | IPI00031691 | 582538 | 1176571 |
| <a href="#">TRANSMEMBRANE PROTEIN</a>                                 | IPI00031697 | 87227  | 85461   |
| Isoform 1 of DNA-binding protein A                                    | IPI00031801 | 0      | 137776  |
| Isoform 1 of Voltage-dependent anion-selective channel protein 3      | IPI00031804 | 465233 | 250020  |
| NUCLEASE-SENSITIVE ELEM                                               | IPI00031812 | 206028 | 357214  |
| Serpin H1 precursor                                                   | IPI00032140 | 217565 | 59971   |
| U6 snRNA-associated Sm-like protein LSm2                              | IPI00032460 | 11006  | 229757  |
| Hsc70-interacting protein                                             | IPI00032826 | 528834 | 201034  |
| COATOMER SUBUNIT ZETA-1                                               | IPI00032851 | 9949   | 226735  |
| Isoform 1 of Septin-7                                                 | IPI00033025 | 66027  | 77590   |
| Myosin regulatory light chain                                         | IPI00033494 | 189425 | 1117851 |
| <a href="#">ISOFORM 1 OF RNA-BINDING</a>                              | IPI00033561 | 0      | 269270  |
| Isoform A of Protein CutA precursor                                   | IPI00034319 | 123829 | 161139  |
| Glyoxylate reductase/hydroxypyruvate reductase                        | IPI00037448 | 66675  | 35472   |
| Histone H2A type 1-A                                                  | IPI00045109 | 279100 | 0       |
| ISOFORM 1 OF GENERAL TR                                               | IPI00054042 | 36440  | 75245   |
| EF-hand domain-containing protein 2                                   | IPI00060181 | 8692   | 195256  |
| RNA binding motif protein, X-linked-like 1                            | IPI00061178 | 302885 | 187005  |
| UP-REGULATED DURING SKE                                               | IPI00063903 | 108965 | 13862   |
| Isoform 1 of Protein SET                                              | IPI00072377 | 679751 | 3330657 |
| Calmodulin                                                            | IPI00075248 | 743393 | 996206  |
| Succinyl-CoA ligase [GDP-forming] beta-chain, mitochondrial precursor | IPI00096066 | 110842 | 163017  |
| Isoform 1 of Cullin-associated NEDD8-dissociated protein 1            | IPI00100160 | 178851 | 429354  |
| Isoform 1 of NSFL1 cofactor p47                                       | IPI00100197 | 7721   | 255703  |



|                                                                        |             |         |          |
|------------------------------------------------------------------------|-------------|---------|----------|
| paraspeckle protein 1                                                  | IPI00103525 | 5237    | 186926   |
| Leucyl-tRNA synthetase, cytoplasmic                                    | IPI00103994 | 96361   | 192027   |
| Proteasome 26S non-ATPase subunit 11 variant (Fragment)                | IPI00105598 | 84310   | 473011   |
| STAPHYLOCOCCAL NUCLEAS                                                 | IPI00140420 | 189696  | 918130   |
| similar to SMT3 suppressor of mif two 3 homolog 2                      | IPI00140827 | 97423   | 19120    |
| Isoform 1 of Cytoskeleton-associated protein 4                         | IPI00141318 | 221648  | 534046   |
| Fascin                                                                 | IPI00163187 | 161351  | 351092   |
| <a href="#">ISOFORM 1 OF RNA-BINDING</a>                               | IPI00163505 | 4708    | 33491    |
| Acidic leucine-rich nuclear phosphoprotein 32 family member E          | IPI00165393 | 346952  | 515257   |
| Phosphoglycerate kinase 1                                              | IPI00169383 | 1220737 | 1710301  |
| proteasome alpha 3 subunit isoform 2                                   | IPI00171199 | 145147  | 218883   |
| Histone H3.2                                                           | IPI00171611 | 455626  | 4078125  |
| heterogeneous nuclear ribonucleoprotein M isoform a                    | IPI00171903 | 801482  | 495328   |
| Isoform SERCA2A of Sarcoplasmic/endoplasmic reticulum calcium ATPase 2 | IPI00177817 | 25900   | 331024   |
| 29 kDa protein                                                         | IPI00178083 | 19787   | 2057226  |
| Isoform 1 of Filamin-C                                                 | IPI00178352 | 164330  | 293481   |
| Elongation factor 1-beta                                               | IPI00178440 | 1338799 | 1562595  |
| ubiquitin and ribosomal protein S27a precursor                         | IPI00179330 | 6473700 | 3501784  |
| Myotrophin                                                             | IPI00179589 | 5417    | 460564   |
| Isoform 1 of Nuclear autoantigenic sperm protein                       | IPI00179953 | 0       | 126837   |
| Isoform 1 of Polypyrimidine tract-binding protein 1                    | IPI00179964 | 2255638 | 3836788  |
| Tubulin alpha-3 chain                                                  | IPI00180675 | 7359084 | 19768302 |
| Isoform 1 of Protein phosphatase 1 regulatory subunit 12A              | IPI00183002 | 91641   | 12418    |
| tropomyosin 3 isoform 1                                                | IPI00183968 | 388166  | 167639   |
| Elongation factor 2                                                    | IPI00186290 | 5586739 | 15158585 |
| PLECTIN 1 ISOFORM 6                                                    | IPI00186711 | 1151607 | 1808199  |
| 60S ribosomal protein L18                                              | IPI00215719 | 943018  | 750243   |
| ISOFORM 3 OF RIBOSOME-BI                                               | IPI00215743 | 0       | 255971   |
| 40S ribosomal protein S19                                              | IPI00215780 | 437556  | 1610227  |
| 60S ribosomal protein L38                                              | IPI00215790 | 146299  | 60948    |
| splicing factor, arginine/serine-rich 1 isoform 1                      | IPI00215884 | 282051  | 1278943  |
| adenylate kinase 2 isoform a                                           | IPI00215901 | 105576  | 258564   |
| DNA-(apurinic or apyrimidinic site) lyase                              | IPI00215911 | 48033   | 474984   |
| ADP-ribosylation factor 1                                              | IPI00215914 | 526417  | 44067    |
| ADP-ribosylation factor 4                                              | IPI00215918 | 1433220 | 2536797  |

|                                                                                         |             |         |          |
|-----------------------------------------------------------------------------------------|-------------|---------|----------|
| heterogeneous nuclear ribonucleoprotein A1 isoform b                                    | IPI00215965 | 2937412 | 4171162  |
| Isoform 1 of Heterogeneous nuclear ribonucleoprotein K                                  | IPI00216049 | 2564858 | 3119340  |
| Cytochrome c oxidase subunit VIb isoform 1                                              | IPI00216085 | 72755   | 52506    |
| Isoform 3 of Putative GTP-binding protein 9                                             | IPI00216106 | 321682  | 517239   |
| Isoform 2 of Phosphatidylinositol-binding clathrin assembly protein                     | IPI00216184 | 32200   | 503837   |
| 60S ribosomal protein L36                                                               | IPI00216237 | 228550  | 503829   |
| Voltage-dependent anion-selective channel protein 1                                     | IPI00216308 | 1476260 | 316408   |
| tyrosine 3-monooxygenase/tryptophan 5-monooxygenase activation protein, beta polypeptid | IPI00216318 | 9731    | 165410   |
| 14-3-3 protein eta                                                                      | IPI00216319 | 0       | 186672   |
| Histone H2A type 2-A                                                                    | IPI00216457 | 7550121 | 24832589 |
| 40S ribosomal protein S8                                                                | IPI00216587 | 870607  | 87109    |
| Isoform C1 of Heterogeneous nuclear ribonucleoproteins C1/C2                            | IPI00216592 | 2223110 | 3867221  |
| Calponin-3                                                                              | IPI00216682 | 37061   | 104111   |
| Profilin-1                                                                              | IPI00216691 | 5039782 | 8784845  |
| plastin 3                                                                               | IPI00216694 | 117000  | 64333    |
| Aspartyl-tRNA synthetase, cytoplasmic                                                   | IPI00216951 | 93491   | 24513    |
| 40S ribosomal protein S4, X isoform                                                     | IPI00217030 | 344236  | 933992   |
| Multifunctional protein ADE2                                                            | IPI00217223 | 90103   | 66761    |
| Tubulin-specific chaperone A                                                            | IPI00217236 | 146211  | 20714    |
| Histone H1.2                                                                            | IPI00217465 | 1399852 | 2319467  |
| Histone H1.5                                                                            | IPI00217468 | 625118  | 1217571  |
| ISOFORM BETA-1C OF INTEG                                                                | IPI00217561 | 139725  | 83715    |
| lactate dehydrogenase A                                                                 | IPI00217966 | 1713737 | 2679729  |
| Lamin-B1                                                                                | IPI00217975 | 318019  | 800881   |
| Cytochrome c oxidase copper chaperone                                                   | IPI00218144 | 0       | 304799   |
| Serine/threonine-protein phosphatase PP1-beta catalytic subunit                         | IPI00218236 | 815304  | 2559954  |
| C-1-tetrahydrofolate synthase, cytoplasmic                                              | IPI00218342 | 409999  | 419272   |
| 16 kDa protein                                                                          | IPI00218733 | 1077709 | 773932   |
| acid phosphatase 1 isoform b                                                            | IPI00218847 | 6310    | 301015   |
| Annexin A1                                                                              | IPI00218918 | 5145541 | 9554799  |
| FK506-binding protein 4                                                                 | IPI00219005 | 32712   | 849973   |
| Glyceraldehyde-3-phosphate dehydrogenase                                                | IPI00219018 | 3962993 | 9113183  |
| Histone H3.3                                                                            | IPI00219038 | 248208  | 2438025  |
| 60S ribosomal protein L22                                                               | IPI00219153 | 897465  | 1138449  |

|                                                                                         |             |         |          |
|-----------------------------------------------------------------------------------------|-------------|---------|----------|
| 60S ribosomal protein L27                                                               | IPI00219155 | 156016  | 48687    |
| 60S ribosomal protein L30                                                               | IPI00219156 | 4255    | 633797   |
| 60S ribosomal protein L34                                                               | IPI00219160 | 205807  | 390707   |
| L-lactate dehydrogenase B chain                                                         | IPI00219217 | 1992028 | 5921412  |
| Galectin-1                                                                              | IPI00219219 | 2130159 | 3939960  |
| Myristoylated alanine-rich C-kinase substrate                                           | IPI00219301 | 0       | 75178    |
| Isoform 5 of Interleukin enhancer-binding factor 3                                      | IPI00219330 | 87739   | 179070   |
| Phosphatidylethanolamine-binding protein 1                                              | IPI00219446 | 111599  | 382273   |
| 6-phosphogluconate dehydrogenase, decarboxylating                                       | IPI00219525 | 536489  | 1259312  |
| Proteasome subunit alpha type 2                                                         | IPI00219622 | 182337  | 238079   |
| Eukaryotic translation initiation factor 2 subunit 1                                    | IPI00219678 | 180534  | 481071   |
| Glutathione S-transferase P                                                             | IPI00219757 | 391336  | 450604   |
| Peroxiredoxin-6                                                                         | IPI00220301 | 1254925 | 1901656  |
| Keratin, type II cytoskeletal 1                                                         | IPI00220327 | 828866  | 676694   |
| 10 kDa heat shock protein, mitochondrial                                                | IPI00220362 | 735180  | 489791   |
| ATP synthase, H+ transporting, mitochondrial F0 complex, subunit d isoform a            | IPI00220487 | 289505  | 2592421  |
| dynactin 2                                                                              | IPI00220503 | 11310   | 317517   |
| 14-3-3 protein gamma                                                                    | IPI00220642 | 344220  | 95915    |
| Isoform 2 of Tropomyosin beta chain                                                     | IPI00220709 | 34069   | 309461   |
| Isoform 2 of Nucleophosmin                                                              | IPI00220740 | 7867816 | 13519615 |
| ISOFORM 2 OF ALPHA-ENDO                                                                 | IPI00220797 | 94926   | 95164    |
| ATP-dependent DNA helicase 2 subunit 2                                                  | IPI00220834 | 1279050 | 4131126  |
| 40S ribosomal protein S9                                                                | IPI00221088 | 565123  | 817200   |
| 40S ribosomal protein S13                                                               | IPI00221089 | 400642  | 324871   |
| 40S ribosomal protein S15a                                                              | IPI00221091 | 7379    | 778417   |
| 40S ribosomal protein S16                                                               | IPI00221092 | 432822  | 772066   |
| 40S ribosomal protein S17                                                               | IPI00221093 | 965915  | 1533625  |
| Isoform 2 of Tumor protein D54                                                          | IPI00221178 | 69605   | 1002199  |
| Activated RNA polymerase II transcriptional coactivator p15                             | IPI00221222 | 1478400 | 669340   |
| Guanine nucleotide-binding protein G(I)/G(S)/G(O) gamma-12 subunit precursor            | IPI00221232 | 359288  | 835638   |
| similar to eukaryotic translation initiation factor 3, subunit 5 epsilon, 47kDa isoform | IPI00240909 | 0       | 446902   |
| keratin 6L                                                                              | IPI00241841 | 14801   | 203299   |
| Nardilysin                                                                              | IPI00243221 | 120891  | 10212    |

|                                                                      |             |         |          |
|----------------------------------------------------------------------|-------------|---------|----------|
| PDCD6IP protein                                                      | IPI00246058 | 87764   | 149530   |
| SORTING NEXIN 6 ISOFORM                                              | IPI00258833 | 25719   | 28458    |
| Bifunctional purine biosynthesis protein PURH                        | IPI00289499 | 7283    | 120984   |
| CATION-INDEPENDENT MANN                                              | IPI00289819 | 73067   | 0        |
| T-complex protein 1 subunit alpha                                    | IPI00290566 | 335008  | 612829   |
| chaperonin containing TCP1, subunit 3 isoform b                      | IPI00290770 | 709847  | 1532929  |
| Malate dehydrogenase, cytoplasmic                                    | IPI00291005 | 109233  | 333373   |
| Malate dehydrogenase, mitochondrial precursor                        | IPI00291006 | 3427267 | 4521851  |
| vinculin isoform VCL                                                 | IPI00291175 | 1384797 | 3430005  |
| Inosine-5'-monophosphate dehydrogenase 2                             | IPI00291510 | 110635  | 200388   |
| Proteasome subunit alpha type 5                                      | IPI00291922 | 324399  | 597330   |
| Macrophage migration inhibitory factor                               | IPI00293276 | 874113  | 989009   |
| Signal recognition particle 14 kDa protein                           | IPI00293434 | 535076  | 1314270  |
| Nuclear pore glycoprotein p62                                        | IPI00293533 | 0       | 437659   |
| ATP-DEPENDENT RNA HELIC                                              | IPI00293655 | 95374   | 55894    |
| Phosphoenolpyruvate carboxykinase [GTP], mitochondrial precursor     | IPI00294380 | 67497   | 163940   |
| Cathepsin B precursor                                                | IPI00295741 | 184027  | 5705     |
| Isoform Mitochondrial of Fumarate hydratase, mitochondrial precursor | IPI00296053 | 211148  | 344191   |
| Isoform 1 of DNA-dependent protein kinase catalytic subunit          | IPI00296337 | 471868  | 630348   |
| Chromobox protein homolog 3                                          | IPI00297579 | 393544  | 11018    |
| T-complex protein 1 subunit beta                                     | IPI00297779 | 826714  | 4086802  |
| Eukaryotic translation initiation factor 2 subunit 3                 | IPI00297982 | 226598  | 2479     |
| Far upstream element-binding protein 2                               | IPI00298363 | 261566  | 489020   |
| Protein DJ-1                                                         | IPI00298547 | 118811  | 1084837  |
| 271 kDa protein                                                      | IPI00298994 | 260341  | 415235   |
| Proliferation-associated protein 2G4                                 | IPI00299000 | 556328  | 596408   |
| Brain acid soluble protein 1                                         | IPI00299024 | 79622   | 450899   |
| Proteasome subunit alpha type 4                                      | IPI00299155 | 133835  | 144167   |
| Isoform 2 of Protein disulfide-isomerase A6 precursor                | IPI00299571 | 2345978 | 689623   |
| 60S ribosomal protein L7a                                            | IPI00299573 | 1080944 | 660120   |
| ISOFORM 1 OF SPLICING FAC                                            | IPI00301503 | 199038  | 35627    |
| filamin A, alpha                                                     | IPI00302592 | 8206028 | 14787220 |

|                                                                                       |             |          |          |
|---------------------------------------------------------------------------------------|-------------|----------|----------|
| Small nuclear ribonucleoprotein Sm D1                                                 | IPI00302850 | 83376    | 2270234  |
| Chaperonin containing TCP1, subunit 8 (Theta) variant                                 | IPI00302925 | 508437   | 671941   |
| T-complex protein 1 subunit delta                                                     | IPI00302927 | 509536   | 1992215  |
| ATP-binding cassette sub-family E member 1                                            | IPI00303207 | 0        | 242994   |
| ATP synthase subunit beta, mitochondrial precursor                                    | IPI00303476 | 3369126  | 6259158  |
| Isoform B of Mannose-6-phosphate receptor-binding protein 1                           | IPI00303882 | 1475805  | 2118948  |
| Heat shock 70 kDa protein 1                                                           | IPI00304925 | 1986320  | 2514225  |
| Ubiquinol-cytochrome-c reductase complex core protein 2, mitochondrial precursor      | IPI00305383 | 178166   | 12650    |
| NOL1/NOP2/Sun domain family 2 protein                                                 | IPI00306369 | 7666     | 186992   |
| NudC domain containing 1                                                              | IPI00306398 | 0        | 81998    |
| Import inner membrane translocase subunit TIM44, mitochondrial precursor              | IPI00306516 | 70717    | 36185    |
| Isoform 1 of Tumor protein D54                                                        | IPI00306825 | 529660   | 710267   |
| Asparaginyl-tRNA synthetase, cytoplasmic                                              | IPI00306960 | 184848   | 193915   |
| Histone-binding protein RBBP4                                                         | IPI00328319 | 212414   | 19712    |
| <a href="#">ISOFORM 1 OF KINECTIN</a>                                                 | IPI00328753 | 192935   | 377362   |
| <a href="#">ZINC FINGER HOMEODOMAIN</a>                                               | IPI00328754 | 34529    | 103804   |
| 60S ribosomal protein L6                                                              | IPI00329389 | 192462   | 287776   |
| Threonyl-tRNA synthetase, cytoplasmic                                                 | IPI00329633 | 211159   | 269362   |
| CDNA FLJ43793 fis, clone TESTI4000014, highly similar to 130 kDa leucine-rich protein | IPI00329745 | 271970   | 1198458  |
| Annexin A5                                                                            | IPI00329801 | 4362990  | 8412540  |
| Isoform 2 of Heterogeneous nuclear ribonucleoprotein A/B 85 kDa protein               | IPI00334587 | 621785   | 91515    |
|                                                                                       | IPI00334775 | 10639272 | 25620390 |
| Pyrroline-5-carboxylate reductase family, member 2                                    | IPI00335061 | 117934   | 56998    |
| myosin, light chain 6, alkali, smooth muscle and non-muscle isoform 1                 | IPI00335168 | 786147   | 1195052  |
| Isoform 2 of Kinectin                                                                 | IPI00337736 | 192935   | 31005    |
| <a href="#">UNCHARACTERIZED PROTEIN</a>                                               | IPI00374686 | 9407     | 171957   |
| <a href="#">HCLS1-ASSOCIATED PROTEIN</a>                                              | IPI00374687 | 167794   | 266329   |
| Interferon-induced 17 kDa protein precursor                                           | IPI00375631 | 91630    | 79316    |
| ribosomal protein L11                                                                 | IPI00376798 | 1011816  | 1436557  |

|                                                                                         |             |          |          |
|-----------------------------------------------------------------------------------------|-------------|----------|----------|
| Heat shock protein HSP 90-alpha 2                                                       | IPI00382470 | 806863   | 1199276  |
| CALRETICULIN=CALCIUM binding protein (Fragment)                                         | IPI00383751 | 114278   | 627709   |
| Full-length cDNA 5-PRIME end of clone CS0DJ009YL13 of T cells (Jurkat cell line) of Hom | IPI00384016 | 88932    | 514704   |
| Proteasome activator complex subunit 2                                                  | IPI00384051 | 916016   | 1144954  |
| ERO1-like protein alpha precursor                                                       | IPI00386755 | 0        | 419786   |
| Tubulin alpha-ubiquitous chain Isoform 1 of Calcyclin-binding protein                   | IPI00387144 | 7329407  | 13574564 |
| Isoform 1 of Eukaryotic translation initiation factor 3 subunit 9                       | IPI00395627 | 391391   | 275811   |
| Isoform B1 of Heterogeneous nuclear ribonucleoproteins A2/B1                            | IPI00396370 | 109432   | 149349   |
| DEAH (Asp-Glu-Ala-His) box polypeptide 15                                               | IPI00396378 | 4021093  | 8683038  |
| Elongation factor 1-alpha 1 similar to 60S ribosomal protein L27a                       | IPI00396435 | 172613   | 86886    |
| Heat shock protein beta                                                                 | IPI00396485 | 12937775 | 22724331 |
| Hypothetical protein DKFZp781K1356                                                      | IPI00398135 | 984341   | 970365   |
| 60S ribosomal protein L10a                                                              | IPI00411633 | 193349   | 32763    |
| GMFB protein                                                                            | IPI00412545 | 155719   | 334906   |
| Ribosomal protein SA                                                                    | IPI00412579 | 97762    | 26034    |
| Hypothetical protein DKFZp686I04222                                                     | IPI00412987 | 63474    | 1054398  |
| RAN-SPECIFIC GTPASE-ACTIN annexin A2 isoform 1                                          | IPI00413108 | 951757   | 3522048  |
| FRUCTOSE-BISPHOSPHATE / Vimentin                                                        | IPI00413451 | 194312   | 325334   |
| Isoform 1 of Heterogeneous nuclear ribonucleoprotein A3                                 | IPI00414127 | 51336    | 288647   |
| Peptidyl-prolyl cis-trans isomerase A                                                   | IPI00418169 | 5742793  | 14867623 |
| 40S ribosomal protein S3a                                                               | IPI00418262 | 52423    | 236334   |
| Dihydrolipoyllysine-residue succinyltransferase component of 2- oxoglutarate dehydrogen | IPI00418471 | 20736328 | 33738196 |
| ARCN1 protein                                                                           | IPI00419373 | 133889   | 185215   |
| ATP synthase subunit alpha, mitochondrial precursor                                     | IPI00419585 | 5010390  | 8723169  |
| CDNA FLJ16223 fis, clone CTONG3003598                                                   | IPI00419880 | 259088   | 15458    |
| Isoform 1 of MIR-interacting saposin-like protein precursor                             | IPI00420108 | 251961   | 33133    |
|                                                                                         | IPI00439944 | 65052    | 129544   |
|                                                                                         | IPI00440493 | 2577202  | 2635374  |
|                                                                                         | IPI00442278 | 2552542  | 150462   |
|                                                                                         | IPI00443909 | 139823   | 218800   |

|                                                                                         |             |          |          |
|-----------------------------------------------------------------------------------------|-------------|----------|----------|
| CDNA FLJ45706 fis, clone FEBRA2028457, highly similar to Nucleolin                      | IPI00444262 | 2217620  | 7253815  |
| Poly [ADP-ribose] polymerase 1                                                          | IPI00449049 | 15043    | 136541   |
| Histone H4                                                                              | IPI00453473 | 13208503 | 5689196  |
| similar to Phosphoglycerate mutase 1 (Phosphoglycerate mutase isozyme B) (PGAM-B) (BPG- | IPI00453476 | 1559609  | 3587728  |
| 60S ACIDIC RIBOSOMAL PRO                                                                | IPI00455557 | 1907605  | 21095    |
| Scaffold attachment factor A2                                                           | IPI00456887 | 155984   | 7985     |
| similar to ribosomal protein S12                                                        | IPI00456898 | 327004   | 27521    |
| Triosephosphate isomerase 1 variant                                                     | IPI00465028 | 4182345  | 2977764  |
| Histone H3.1                                                                            | IPI00465070 | 1422158  | 4994635  |
| enolase 1                                                                               | IPI00465248 | 6976942  | 9495513  |
| GARS protein                                                                            | IPI00465260 | 726615   | 1377104  |
| Cytochrome c                                                                            | IPI00465315 | 286461   | 1229402  |
| 60S ribosomal protein L13                                                               | IPI00465361 | 519588   | 915921   |
| 70 kDa protein                                                                          | IPI00465430 | 2299465  | 2753825  |
| Galectin-3                                                                              | IPI00465431 | 301537   | 58702    |
| Fructose-bisphosphate aldolase A                                                        | IPI00465439 | 586279   | 1669620  |
| 61 kDa protein                                                                          | IPI00472102 | 9802881  | 12936549 |
| Isoform 1 of Spectrin alpha chain, brain                                                | IPI00478292 | 90132    | 418863   |
| pyruvate kinase 3 isoform 1                                                             | IPI00479186 | 12247623 | 15110813 |
| heterogeneous nuclear ribonucleoprotein U isoform b                                     | IPI00479217 | 928536   | 1278870  |
| Stathmin                                                                                | IPI00479997 | 3824322  | 7390318  |
| 60S ribosomal protein L3                                                                | IPI00550021 | 160329   | 529780   |
| Transgelin-2                                                                            | IPI00550363 | 1177969  | 2303443  |
| Phosphoglucomutase-2                                                                    | IPI00550364 | 169647   | 258239   |
| Nuclear migration protein nudC                                                          | IPI00550746 | 151103   | 284537   |
| Keratin, type II cytoskeletal 8                                                         | IPI00554648 | 1317725  | 4657443  |
| 49 kDa protein                                                                          | IPI00554788 | 1756642  | 1215234  |
| Actin-related protein 2/3 complex subunit 4                                             | IPI00554811 | 311321   | 323126   |
| 4 KDA PROTEIN                                                                           | IPI00556589 | 99780    | 18027    |
| NME1-NME2 protein                                                                       | IPI00604590 | 3531197  | 5997580  |
| BAG family molecular chaperone regulator 3                                              | IPI00641582 | 98112    | 237695   |
| 46 KDA PROTEIN                                                                          | IPI00641706 | 34150    | 494654   |
| PROTEIN.                                                                                | IPI00641707 | 390268   | 217416   |
| Lung cancer oncogene 7                                                                  | IPI00641950 | 758539   | 1575524  |
| Signal recognition particle 9 kDa protein                                               | IPI00642816 | 647741   | 32108    |
| GTP-binding nuclear protein Ran                                                         | IPI00643041 | 2070370  | 3862936  |
| Transketolase                                                                           | IPI00643920 | 294503   | 1149047  |

|                                                        |             |         |         |
|--------------------------------------------------------|-------------|---------|---------|
| Ubiquitin-activating enzyme E1                         | IPI00645078 | 1221061 | 2871473 |
| HIST2H3PS2 protein                                     | IPI00646240 | 121759  | 1009674 |
| peptidylprolyl isomerase B precursor                   | IPI00646304 | 718214  | 1295561 |
| UNCHARACTERIZED PROTEIN                                | IPI00646762 | 88627   | 174702  |
| similar to Splicing factor, arginine/serine-rich, 46kD | IPI00718917 | 447746  | 508158  |
| RELA protein                                           | IPI00719633 | 208121  | 5879    |
| ATP-dependent RNA helicase A                           | IPI00742905 | 110649  | 413634  |
| CONSERVED HYPOTHETICAL                                 | IPI00744848 | 93813   | 0       |
| Ezrin                                                  | IPI00746388 | 722163  | 994374  |
| FK506 binding protein12                                | IPI00759644 | 0       | 365141  |
| 37 KDA PROTEIN                                         | IPI00789310 | 569648  | 1361644 |
| UNCHARACTERIZED PROTEIN                                | IPI00789311 | 568788  | 1245129 |
| 19 kDa protein                                         | IPI00793696 | 167032  | 336480  |
|                                                        | IPI00794404 | 91970   | 84350   |
|                                                        | IPI00794405 | 170778  | 209797  |



| Name of protein                                                        | Id          | C1        | H1        |
|------------------------------------------------------------------------|-------------|-----------|-----------|
|                                                                        |             | abundance | abundance |
| Major vault protein                                                    | IPI00000105 | 174005    | 356478    |
| PNAS-139                                                               | IPI00000477 | 62157     | 33203     |
| 14-3-3 protein epsilon                                                 | IPI00000816 | 78593     | 196175    |
| Isoform 1 of LIM and SH3 domain protein 1                              | IPI00000861 | 138618    | 309180    |
| Valyl-tRNA synthetase                                                  | IPI00000873 | 82059     | 16361     |
| Peroxiredoxin-1                                                        | IPI00000874 | 2881563   | 1850554   |
| Elongation factor 1-gamma                                              | IPI00000875 | 651569    | 490841    |
| MITOCHONDRIAL IMPC                                                     | IPI00001543 | 7090      | 78764     |
| Mitochondrial import inner membrane translocase subunit Tim13          | IPI00001589 | 274943    | 159487    |
| Importin beta-1 subunit                                                | IPI00001639 | 587076    | 839767    |
| Isoform 1 of RNA-binding protein 8A                                    | IPI00001757 | 77191     | 41153     |
| Chloride intracellular channel protein 4                               | IPI00001960 | 73570     | 217280    |
| IMPORTIN SUBUNIT AL                                                    | IPI00002214 | 52502     | 174126    |
| annexin VI isoform 2                                                   | IPI00002459 | 34200     | 131200    |
| Serine hydroxymethyltransferase, mitochondrial precursor               | IPI00002520 | 358567    | 167000    |
| ISOFORM 1 OF COPINE                                                    | IPI00002657 | 50033     | 119241    |
| 60S ribosomal protein L14                                              | IPI00002821 | 158561    | 83373     |
| Heat shock 70 kDa protein 4                                            | IPI00002966 | 3336559   | 5800904   |
| HSPA5 protein                                                          | IPI00003362 | 4800506   | 6403241   |
| Isoform 1 of Splicing factor, arginine/serine-rich 7                   | IPI00003377 | 552327    | 23972     |
| Drebrin                                                                | IPI00003406 | 93939     | 99406     |
| Rho GDP-dissociation inhibitor 1                                       | IPI00003815 | 127194    | 300246    |
| Isoform 1 of Heat shock cognate 71 kDa protein                         | IPI00003865 | 9986767   | 10229251  |
| Histone H2B type 2-E                                                   | IPI00003935 | 396984    | 32373     |
| Ubiquitin-conjugating enzyme E2 N                                      | IPI00003949 | 163873    | 88110     |
| Isoform SERCA3B of Sarcoplasmic/endoplasmic reticulum calcium ATPase 3 | IPI00004092 | 12265     | 95731     |
| Glycogen phosphorylase, brain form                                     | IPI00004358 | 48467     | 788542    |
| Beta-2-microglobulin precursor                                         | IPI00004656 | 934799    | 663558    |
| FACT complex subunit SSRP1                                             | IPI00005154 | 53402     | 42980     |

|                                                                                     |             |         |         |
|-------------------------------------------------------------------------------------|-------------|---------|---------|
| Lon protease homolog, mitochondrial precursor                                       | IPI00005158 | 132518  | 157384  |
| Actin-related protein 2/3 complex subunit 2                                         | IPI00005161 | 62157   | 33203   |
| Interleukin enhancer-binding factor 2                                               | IPI00005198 | 465110  | 319673  |
| Membrane-associated progesterone receptor component 2                               | IPI00005202 | 66018   | 56807   |
| 39S ribosomal protein L12, mitochondrial precursor                                  | IPI00005537 | 197227  | 102035  |
| Isoform Long of Spectrin beta chain, brain 1                                        | IPI00005614 | 120592  | 55953   |
| Scaffold attachment factor B2                                                       | IPI00005648 | 29508   | 181978  |
| Prefoldin subunit 6                                                                 | IPI00005657 | 38677   | 257547  |
| Isoform Gamma-1 of Serine/threonine-protein phosphatase PP1-gamma catalytic subunit | IPI00005705 | 741736  | 1630374 |
| ISOFORM 1 OF SURFEI                                                                 | IPI00005737 | 87954   | 329659  |
| Prefoldin subunit 2                                                                 | IPI00006052 | 497056  | 176532  |
| VAMP-associated protein B/C                                                         | IPI00006211 | 131337  | 46181   |
| GUANINE NUCLEOTIDE                                                                  | IPI00006395 | 268699  | 213845  |
| Vesicle-trafficking protein SEC22b                                                  | IPI00006865 | 142204  | 483577  |
| EUKARYOTIC TRANSLA                                                                  | IPI00006935 | 448840  | 254388  |
| Tyrosyl-tRNA synthetase, cytoplasmic                                                | IPI00007074 | 175242  | 33712   |
| ADP/ATP translocase 2                                                               | IPI00007188 | 833990  | 765299  |
| 120 kDa protein                                                                     | IPI00007402 | 75492   | 0       |
| Tubulin beta-2C chain                                                               | IPI00007752 | 655874  | 617557  |
| Stress-70 protein, mitochondrial precursor                                          | IPI00007765 | 3898457 | 4137950 |
| Methionyl-tRNA synthetase, cytoplasmic                                              | IPI00008240 | 139231  | 175875  |
| Adenylyl cyclase-associated protein 1                                               | IPI00008274 | 662513  | 1538186 |
| 40S ribosomal protein S5                                                            | IPI00008433 | 1363228 | 1708875 |
| 40S ribosomal protein S10                                                           | IPI00008438 | 164464  | 115536  |
| Intercellular adhesion molecule 1 precursor                                         | IPI00008494 | 415878  | 126592  |

|                                                                          |             |         |         |
|--------------------------------------------------------------------------|-------------|---------|---------|
| Isoform 1 of Polyadenylate-binding protein 1                             | IPI00008524 | 83515   | 839246  |
| 60S acidic ribosomal protein P1                                          | IPI00008527 | 2536018 | 3867558 |
| 60S acidic ribosomal protein P2                                          | IPI00008529 | 3854934 | 3865560 |
| 60S acidic ribosomal protein P0                                          | IPI00008530 | 718315  | 633268  |
| Isoform Beta of LIM domain and actin-binding protein 1                   | IPI00008918 | 20924   | 32868   |
| Isoform LAMP-2A of Lysosome-associated membrane glycoprotein 2 precursor | IPI00009030 | 207220  | 102087  |
| Lupus La protein                                                         | IPI00009032 | 332500  | 667077  |
| RuvB-like 2                                                              | IPI00009104 | 106597  | 24217   |
| Glucosamine-6-phosphate isomerase                                        | IPI00009305 | 86376   | 114107  |
| Ras GTPase-activating-like protein IQGAP1                                | IPI00009342 | 629866  | 702596  |
| Sulfide:quinone oxidoreductase, mitochondrial precursor                  | IPI00009634 | 467661  | 42139   |
| 6-phosphofructokinase type C                                             | IPI00009790 | 285321  | 399105  |
| Keratin, type I cytoskeletal 10                                          | IPI00009865 | 251241  | 35266   |
| Protein disulfide-isomerase A4 precursor                                 | IPI00009904 | 566016  | 599806  |
| Eukaryotic translation initiation factor 6                               | IPI00010105 | 101568  | 88704   |
| 60S ribosomal protein L23                                                | IPI00010153 | 224169  | 328295  |
| Rab GDP dissociation inhibitor alpha                                     | IPI00010154 | 116867  | 291756  |
| S-adenosylmethionine synthetase isoform type-2                           | IPI00010157 | 173830  | 12860   |
| diazepam binding inhibitor isoform 3                                     | IPI00010182 | 99519   | 125234  |
| Hypothetical protein                                                     | IPI00010402 | 259710  | 163712  |
| T-complex protein 1 subunit epsilon                                      | IPI00010720 | 1254795 | 1078519 |
| Isoform Long of Splicing factor, proline- and glutamine-rich             | IPI00010740 | 373011  | 1197676 |
| Tropomyosin 4                                                            | IPI00010779 | 603269  | 3281610 |
| NAD-dependent malic enzyme, mitochondrial precursor                      | IPI00010796 | 489346  | 1473471 |

|                                                            |             |         |         |
|------------------------------------------------------------|-------------|---------|---------|
| 40S ribosomal protein S18                                  | IPI00010810 | 325879  | 246352  |
| Chloride intracellular channel protein 1                   | IPI00010896 | 1312101 | 1806454 |
| D-3-phosphoglycerate dehydrogenase                         | IPI00011200 | 109703  | 16322   |
| NAD-dependent malic enzyme, mitochondrial precursor        | IPI00011201 | 134362  | 67057   |
| 40S ribosomal protein S3                                   | IPI00011253 | 938757  | 1206765 |
| heterogeneous nuclear ribonucleoprotein D-like             | IPI00011274 | 915811  | 1066952 |
| 26S proteasome non-ATPase regulatory subunit 3             | IPI00011603 | 60926   | 99818   |
| Tubulin beta chain                                         | IPI00011654 | 6788463 | 6114660 |
| Adenosylhomocysteinase                                     | IPI00012007 | 49250   | 77602   |
| Cofilin-1                                                  | IPI00012011 | 3826118 | 3795997 |
| poly(rC)-binding protein 2 isoform b                       | IPI00012066 | 820705  | 960034  |
| Heterogeneous nuclear ribonucleoprotein R                  | IPI00012074 | 131803  | 218992  |
| N-acetylglucosamine-6-sulfatase precursor                  | IPI00012102 | 97415   | 96740   |
| Isoform SRP55-1 of Splicing factor, arginine/serine-rich 6 | IPI00012345 | 153790  | 126504  |
| Ras GTPase-activating protein-binding protein 1            | IPI00012442 | 8173    | 594098  |
| Isoform Sap-mu-0 of Proactivator polypeptide precursor     | IPI00012503 | 881190  | 3250850 |
| 40S ribosomal protein S25                                  | IPI00012750 | 322299  | 314177  |
| 40S ribosomal protein S18                                  | IPI00013296 | 213654  | 28274   |
| 40S ribosomal protein S7                                   | IPI00013415 | 160574  | 31735   |
| glutamyl-prolyl tRNA synthetase                            | IPI00013452 | 143001  | 96440   |
| TUBULIN BETA-2A CHAIN                                      | IPI00013475 | 133991  | 313872  |
| 40S RIBOSOMAL PROTEIN S18                                  | IPI00013485 | 1555102 | 274854  |
| Alpha-actinin-1                                            | IPI00013508 | 3863470 | 1806610 |
| Alpha-actinin-4                                            | IPI00013808 | 993368  | 378422  |
| heterogeneous nuclear ribonucleoprotein H1                 | IPI00013881 | 1910527 | 4037319 |
| Stress-induced-phosphoprotein 1                            | IPI00013894 | 701737  | 3980061 |
| Protein S100-A11                                           | IPI00013895 | 329473  | 150663  |
| Septin-2                                                   | IPI00014177 | 276826  | 83918   |

|                                                                                      |             |         |         |
|--------------------------------------------------------------------------------------|-------------|---------|---------|
| Complement component 1 Q subcomponent-binding protein, mitochondrial precursor       | IPI00014230 | 151926  | 1742349 |
| Lysyl-tRNA synthetase                                                                | IPI00014238 | 78037   | 13545   |
| Elongation factor 1-alpha 2                                                          | IPI00014424 | 124118  | 149377  |
| ISOFORM 1 OF DYNEIN                                                                  | IPI00014845 | 30984   | 9975    |
| Prostaglandin E synthase 3                                                           | IPI00015029 | 814623  | 323029  |
| Eukaryotic translation initiation factor 1                                           | IPI00015077 | 43969   | 550291  |
| Calponin-2                                                                           | IPI00015262 | 548280  | 520834  |
| Prefoldin subunit 5                                                                  | IPI00015361 | 408132  | 51942   |
| tubulin, alpha-like 3                                                                | IPI00015671 | 233648  | 303769  |
| Reticulocalbin-1 precursor                                                           | IPI00015842 | 128872  | 831006  |
| Dihydrolipoyl dehydrogenase, mitochondrial precursor                                 | IPI00015911 | 214598  | 511570  |
| RAS-RELATED PROTEIN                                                                  | IPI00016339 | 203349  | 71277   |
| Ras-related protein Rab-7                                                            | IPI00016342 | 91318   | 422843  |
| Ras-related protein Rab-10                                                           | IPI00016513 | 15450   | 417043  |
| Poly(rC)-binding protein 1                                                           | IPI00016610 | 939267  | 775560  |
| Matrin-3                                                                             | IPI00017297 | 1164651 | 1850316 |
| Prohibitin                                                                           | IPI00017334 | 2370139 | 2498626 |
| 40S ribosomal protein S21                                                            | IPI00017448 | 329249  | 346418  |
| SPLICING FACTOR 3 SUBUNIT                                                            | IPI00017451 | 3672    | 208580  |
| Probable ATP-dependent RNA helicase DDX5                                             | IPI00017617 | 528311  | 394275  |
| CDNA FLJ25678 fis, clone TST04067, highly similar to PURINE NUCLEOSIDE PHOSPHORYLASE | IPI00017672 | 54892   | 179247  |
| Aconitate hydratase, mitochondrial precursor                                         | IPI00017855 | 101846  | 29600   |
| Small nuclear ribonucleoprotein Sm D3                                                | IPI00017964 | 349449  | 740644  |
| Isoform 1 of Heterogeneous nuclear ribonucleoprotein Q                               | IPI00018140 | 7228    | 73147   |
| 14-3-3 protein theta                                                                 | IPI00018146 | 1899874 | 190232  |

|                                                                 |             |          |          |
|-----------------------------------------------------------------|-------------|----------|----------|
| Aspartate aminotransferase, mitochondrial precursor             | IPI00018206 | 537290   | 935819   |
| Histone H2AV                                                    | IPI00018278 | 0        | 586256   |
| T-complex protein 1 subunit eta                                 | IPI00018465 | 322273   | 418696   |
| Isoform 1 of Protein arginine N-methyltransferase 1             | IPI00018522 | 57962    | 102708   |
| Histone H2B type 1-L                                            | IPI00018534 | 7537726  | 5085379  |
| VACUOLAR PROTEIN S                                              | IPI00018931 | 43972    | 120190   |
| Myosin-9                                                        | IPI00019502 | 1717342  | 3073537  |
| Glutathione transferase omega-1                                 | IPI00019755 | 28483    | 190184   |
| ubiquitin-like protein fubi and ribosomal protein S30 precursor | IPI00019770 | 482710   | 185922   |
| Isoform 1 of 26S protease regulatory subunit 6B                 | IPI00020042 | 120778   | 1024461  |
| H2B histone family, member A                                    | IPI00020101 | 806286   | 5050055  |
| Calreticulin precursor                                          | IPI00020599 | 6615     | 464820   |
| Hepatoma-derived growth factor                                  | IPI00020956 | 231226   | 12527    |
| Calnexin precursor                                              | IPI00020984 | 758461   | 1557712  |
| Isoform 1 of RuvB-like 1                                        | IPI00021187 | 116249   | 73272    |
| 14-3-3 protein zeta/delta                                       | IPI00021263 | 1445039  | 8770107  |
| 60S ribosomal protein L23a                                      | IPI00021266 | 19546    | 313869   |
| ATP-citrate synthase                                            | IPI00021290 | 133972   | 854430   |
| Ubiquitin-conjugating enzyme E2 L3                              | IPI00021347 | 614307   | 1261960  |
| Isoform A of Lamin-A/C                                          | IPI00021405 | 4810069  | 2881707  |
| Actin, alpha skeletal muscle                                    | IPI00021428 | 824992   | 0        |
| Actin, cytoplasmic 1                                            | IPI00021439 | 34095191 | 24630846 |
| PROLIFERATING CELL                                              | IPI00021700 | 0        | 201296   |
| NEUROBLAST DIFFER                                               | IPI00021812 | 53066    | 131042   |
| Cystatin B                                                      | IPI00021828 | 136180   | 183445   |
| 40S ribosomal protein S6                                        | IPI00021840 | 126518   | 10833    |
| 26S protease regulatory subunit S10B                            | IPI00021926 | 102296   | 203297   |
| Superoxide dismutase [Mn], mitochondrial precursor              | IPI00022314 | 201345   | 93980    |
| ALB protein                                                     | IPI00022434 | 80655    | 2092933  |

|                                                                       |             |         |         |
|-----------------------------------------------------------------------|-------------|---------|---------|
| Acyl carrier protein, mitochondrial precursor                         | IPI00022442 | 62501   | 277805  |
| Isoform 1 of Exportin-2                                               | IPI00022744 | 0       | 504615  |
| Transitional endoplasmic reticulum ATPase                             | IPI00022774 | 1270566 | 2671728 |
| Trifunctional enzyme beta subunit, mitochondrial precursor            | IPI00022793 | 302992  | 325796  |
| Elongation factor 1-delta                                             | IPI00023048 | 862539  | 3632817 |
| Tubulin beta-4 chain                                                  | IPI00023598 | 168206  | 271398  |
| Nascent polypeptide-associated complex subunit alpha                  | IPI00023748 | 484488  | 627938  |
| Nucleosome assembly protein 1-like 1                                  | IPI00023860 | 831733  | 420672  |
| clathrin heavy chain 1                                                | IPI00024067 | 2593319 | 2943534 |
| Isoform 1 of Voltage-dependent anion-selective channel protein 2      | IPI00024145 | 797312  | 798747  |
| Isoform 1 of Proteasome subunit alpha type 7                          | IPI00024175 | 376130  | 538578  |
| Endoplasmic reticulum protein ERp29 precursor                         | IPI00024911 | 86542   | 94303   |
| Isoform Mitochondrial of Peroxiredoxin-5, mitochondrial precursor     | IPI00024915 | 291305  | 719616  |
| Thioredoxin-dependent peroxide reductase, mitochondrial precursor     | IPI00024919 | 286870  | 225382  |
| 60S ribosomal protein L12                                             | IPI00024933 | 896408  | 568306  |
| Enoyl-CoA hydratase, mitochondrial precursor                          | IPI00024993 | 275584  | 455410  |
| Proteasome subunit beta type 1 precursor                              | IPI00025019 | 208010  | 40495   |
| Protein disulfide-isomerase A3 precursor                              | IPI00025252 | 2812378 | 5195664 |
| Isoform Long of Trifunctional purine biosynthetic protein adenosine-3 | IPI00025273 | 65252   | 66800   |
| Citrate synthase, mitochondrial precursor                             | IPI00025366 | 63226   | 1771549 |

|                                                                            |             |         |          |
|----------------------------------------------------------------------------|-------------|---------|----------|
| Eukaryotic initiation factor 4A-I                                          | IPI00025491 | 419494  | 377798   |
| Heat-shock protein beta-1                                                  | IPI00025512 | 3100118 | 3515281  |
| Acidic leucine-rich nuclear phosphoprotein 32 family member A              | IPI00025849 | 822818  | 2204236  |
| Barrier-to-autointegration factor                                          | IPI00026087 | 553903  | 1261060  |
| Glucosidase 2 subunit beta precursor                                       | IPI00026154 | 777997  | 229904   |
| NHP2-like protein 1                                                        | IPI00026167 | 191482  | 150320   |
| Isoform 1 of F-actin capping protein subunit beta                          | IPI00026185 | 7340    | 93070    |
| 60S ribosomal protein L18a                                                 | IPI00026202 | 157027  | 20250    |
| Puromycin-sensitive aminopeptidase                                         | IPI00026216 | 65662   | 133840   |
| HISTONE H2A TYPE 1-E                                                       | IPI00026272 | 9107951 | 18131752 |
| 60S ribosomal protein L31                                                  | IPI00026302 | 369447  | 50553    |
| THIOREDOXIN DOMAIN                                                         | IPI00026328 | 166930  | 89767    |
| HLA CLASS I HISTOCOM                                                       | IPI00026569 | 268279  | 151159   |
| Cytochrome c oxidase polypeptide VIIa-liver/heart, mitochondrial precursor | IPI00026570 | 130294  | 203528   |
| Fatty acid synthase                                                        | IPI00026781 | 364092  | 1201435  |
| CYTOCHROME B-C1 C                                                          | IPI00026964 | 50322   | 7586     |
| Tu translation elongation factor, mitochondrial                            | IPI00027107 | 562906  | 828034   |
| ISOCITRATE DEHYDR                                                          | IPI00027223 | 127944  | 165784   |
| Endoplasmic precursor                                                      | IPI00027230 | 1918006 | 2067578  |
| Prohibitin-2                                                               | IPI00027252 | 121532  | 72751    |
| Isoform 1 of Hematological and neurological expressed 1-like protein       | IPI00027397 | 62029   | 97012    |
| Alanyl-tRNA synthetase, cytoplasmic                                        | IPI00027442 | 118103  | 235407   |
| T-complex protein 1 subunit zeta                                           | IPI00027626 | 292671  | 530575   |
| Proteasome subunit beta type 3                                             | IPI00028004 | 135845  | 261590   |
| Proteasome subunit beta type 2                                             | IPI00028006 | 0       | 196651   |
| ISOFORM 1 OF VERY L                                                        | IPI00028031 | 97806   | 33556    |
| Actin-like protein 3                                                       | IPI00028091 | 610683  | 1468056  |
| Dpy-30-like protein                                                        | IPI00028109 | 70969   | 95737    |



|                                                                  |             |         |         |
|------------------------------------------------------------------|-------------|---------|---------|
| Isoform 1 of Heterogeneous nuclear ribonucleoprotein D0          | IPI00028888 | 1734927 | 888510  |
| Alpha-centractin                                                 | IPI00029468 | 161945  | 192680  |
| Src substrate cortactin                                          | IPI00029601 | 235723  | 135404  |
| Proteasome subunit alpha type 6                                  | IPI00029623 | 140185  | 255823  |
| Proteasome activator complex subunit 1                           | IPI00030154 | 161628  | 223066  |
| 60S ribosomal protein L7                                         | IPI00030179 | 201877  | 110697  |
| Isoform 1 of Proteasome activator complex subunit 3              | IPI00030243 | 54974   | 73843   |
| Heat shock protein 75 kDa, mitochondrial precursor               | IPI00030275 | 39744   | 93388   |
| MYOSIN REGULATORY                                                | IPI00030929 | 9955    | 84101   |
| Adipocyte plasma membrane-associated protein                     | IPI00031131 | 22018   | 12965   |
| Ras-related protein Rab-2A                                       | IPI00031169 | 63977   | 10634   |
| Rab GDP dissociation inhibitor beta                              | IPI00031461 | 277932  | 1035239 |
| Trifunctional enzyme subunit alpha, mitochondrial precursor      | IPI00031522 | 508255  | 434082  |
| Splicing factor U2AF 65 kDa subunit                              | IPI00031556 | 153126  | 24279   |
| 60S ribosomal protein L9                                         | IPI00031691 | 582538  | 504468  |
| Isoform 1 of Voltage-dependent anion-selective channel protein 3 | IPI00031804 | 465233  | 369111  |
| NUCLEASE-SENSITIVE                                               | IPI00031812 | 206028  | 307192  |
| Serpin H1 precursor                                              | IPI00032140 | 217565  | 211829  |
| U6 snRNA-associated Sm-like protein LSm2                         | IPI00032460 | 11006   | 279927  |
| Hsc70-interacting protein                                        | IPI00032826 | 528834  | 228613  |
| COATOMER SUBUNIT 2                                               | IPI00032851 | 9949    | 178781  |
| SUCCINYLTRANSFERASE                                              | IPI00033034 | 86327   | 98456   |
| Myosin regulatory light chain                                    | IPI00033494 | 176388  | 139220  |
| Isoform A of Protein CutA precursor                              | IPI00034319 | 123829  | 11799   |
| Glyoxylate reductase/hydroxypyruvate reductase                   | IPI00037448 | 66675   | 50113   |
| Histone H2A type 1-A                                             | IPI00045109 | 279100  | 331445  |
| ISOFORM 1 OF UNCHA                                               | IPI00045660 | 94623   | 73412   |

|                                                               |             |         |         |
|---------------------------------------------------------------|-------------|---------|---------|
| RNA binding motif protein, X-linked-like 1                    | IPI00061178 | 193195  | 289946  |
| UP-REGULATED DURIN                                            | IPI00063903 | 108965  | 11210   |
| Isoform 1 of Protein SET                                      | IPI00072377 | 679751  | 3097379 |
| Calmodulin                                                    | IPI00075248 | 743393  | 1329555 |
| Isoform 1 of Cullin-associated NEDD8-dissociated protein 1    | IPI00100160 | 77443   | 81205   |
| Isoform 1 of NSFL1 cofactor p47                               | IPI00100197 | 114595  | 270275  |
| Leucyl-tRNA synthetase, cytoplasmic                           | IPI00103994 | 96361   | 15153   |
| Proteasome 26S non-ATPase subunit 11 variant (Fragment)       | IPI00105598 | 10054   | 177843  |
| similar to SMT3 suppressor of mif two 3 homolog 2             | IPI00140827 | 97423   | 16805   |
| Isoform 1 of Cytoskeleton-associated protein 4                | IPI00141318 | 198612  | 243236  |
| HIRA interacting protein 5 isoform 1                          | IPI00160021 | 53948   | 72125   |
| Fascin                                                        | IPI00163187 | 161351  | 221327  |
| Acidic leucine-rich nuclear phosphoprotein 32 family member E | IPI00165393 | 346952  | 726909  |
| Phosphoglycerate kinase 1                                     | IPI00169383 | 1220737 | 1288304 |
| proteasome alpha 3 subunit isoform 2                          | IPI00171199 | 145147  | 89331   |
| Histone H3.2                                                  | IPI00171611 | 455626  | 6437630 |
| heterogeneous nuclear ribonucleoprotein M isoform a           | IPI00171903 | 814890  | 1425331 |
| ISOFORM DELTA 6 OF                                            | IPI00172636 | 9705    | 61342   |
| Isoform 1 of Filamin-C                                        | IPI00178352 | 102522  | 310061  |
| Elongation factor 1-beta                                      | IPI00178440 | 1338799 | 2182500 |
| ubiquitin and ribosomal protein S27a precursor                | IPI00179330 | 6399179 | 4878574 |
| Myotrophin                                                    | IPI00179589 | 2732    | 152323  |
| Isoform 1 of Polypyrimidine tract-binding protein 1           | IPI00179964 | 2268308 | 2411338 |
| Tubulin alpha-3 chain                                         | IPI00180675 | 865931  | 850842  |
| Isoform 1 of Protein phosphatase 1 regulatory subunit 12A     | IPI00183002 | 91641   | 8619    |
| tropomyosin 3 isoform 1                                       | IPI00183968 | 388166  | 88977   |
| Elongation factor 2                                           | IPI00186290 | 5675627 | 5712031 |

|                                                              |             |         |         |
|--------------------------------------------------------------|-------------|---------|---------|
| PLECTIN 1 ISOFORM 6                                          | IPI00186711 | 300787  | 370839  |
| ATP-dependent RNA helicase DDX3X                             | IPI00215637 | 28843   | 236726  |
| 60S ribosomal protein L18                                    | IPI00215719 | 943018  | 1057177 |
| ISOFORM 3 OF RIBOSC                                          | IPI00215743 | 0       | 133835  |
| 40S ribosomal protein S19                                    | IPI00215780 | 437556  | 443827  |
| 60S ribosomal protein L38                                    | IPI00215790 | 146299  | 0       |
| splicing factor, arginine/serine-rich 1 isoform 1            | IPI00215884 | 282051  | 760195  |
| ADP-ribosylation factor 1                                    | IPI00215914 | 1935472 | 1798589 |
| heterogeneous nuclear ribonucleoprotein A1 isoform b         | IPI00215965 | 2694637 | 1394163 |
| Isoform 1 of Heterogeneous nuclear ribonucleoprotein K       | IPI00216049 | 2536851 | 2372714 |
| Cytochrome c oxidase subunit VIb isoform 1                   | IPI00216085 | 72755   | 0       |
| Isoform 3 of Putative GTP-binding protein 9                  | IPI00216106 | 321682  | 60888   |
| 60S ribosomal protein L36                                    | IPI00216237 | 228550  | 16497   |
| Thioredoxin                                                  | IPI00216298 | 115963  | 725003  |
| Voltage-dependent anion-selective channel protein 1          | IPI00216308 | 1476260 | 113224  |
| 40S ribosomal protein S8                                     | IPI00216587 | 870607  | 34007   |
| Isoform C1 of Heterogeneous nuclear ribonucleoproteins C1/C2 | IPI00216592 | 2223110 | 1447181 |
| Calponin-3                                                   | IPI00216682 | 45667   | 227696  |
| Profilin-1                                                   | IPI00216691 | 5039782 | 9817520 |
| plastin 3                                                    | IPI00216694 | 117000  | 63722   |
| Aspartyl-tRNA synthetase, cytoplasmic                        | IPI00216951 | 93491   | 11235   |
| 40S ribosomal protein S4, X isoform                          | IPI00217030 | 334425  | 579467  |
| Multifunctional protein ADE2                                 | IPI00217223 | 90103   | 52240   |
| Tubulin-specific chaperone A                                 | IPI00217236 | 146211  | 12330   |
| Histone H1.2                                                 | IPI00217465 | 1393554 | 455430  |
| Histone H1.5                                                 | IPI00217468 | 625118  | 725153  |
| ISOFORM BETA-1C OF                                           | IPI00217561 | 139725  | 111242  |
| lactate dehydrogenase A                                      | IPI00217966 | 1713737 | 744452  |
| Lamin-B1                                                     | IPI00217975 | 318019  | 449933  |

|                                                                              |             |         |          |
|------------------------------------------------------------------------------|-------------|---------|----------|
| Serine/threonine-protein phosphatase PP1-beta catalytic subunit              | IPI00218236 | 68751   | 40013    |
| C-1-tetrahydrofolate synthase, cytoplasmic 16 kDa protein                    | IPI00218342 | 409999  | 240019   |
| ISOFORM 3 OF TROPO                                                           | IPI00218733 | 769769  | 1712950  |
| Annexin A1                                                                   | IPI00218820 | 34069   | 366750   |
| FK506-binding protein 4                                                      | IPI00218918 | 3859578 | 8552462  |
| Glyceraldehyde-3-phosphate dehydrogenase                                     | IPI00219005 | 32712   | 513330   |
| Histone H3.3                                                                 | IPI00219018 | 5791726 | 3252131  |
| 60S ribosomal protein L22                                                    | IPI00219038 | 248208  | 1318379  |
| 60S ribosomal protein L27                                                    | IPI00219153 | 826072  | 518878   |
| 60S ribosomal protein L30                                                    | IPI00219155 | 156016  | 12546    |
| 60S ribosomal protein L34                                                    | IPI00219156 | 4255    | 1180660  |
| L-lactate dehydrogenase B chain                                              | IPI00219160 | 205807  | 19179    |
| Galectin-1                                                                   | IPI00219217 | 1439243 | 2956009  |
| U6 snRNA-associated Sm-like protein LSM3                                     | IPI00219219 | 2232242 | 2787439  |
| Phosphatidylethanolamine-binding protein 1                                   | IPI00219229 | 167548  | 111913   |
| 6-phosphogluconate dehydrogenase, decarboxylating                            | IPI00219446 | 87595   | 187436   |
| Proteasome subunit alpha type 2                                              | IPI00219525 | 536489  | 1091997  |
| Eukaryotic translation initiation factor 2 subunit 1                         | IPI00219622 | 182337  | 269732   |
| Glutathione S-transferase P                                                  | IPI00219678 | 189641  | 116585   |
| Peroxiredoxin-6                                                              | IPI00219757 | 391336  | 301331   |
| Keratin, type II cytoskeletal 1                                              | IPI00220301 | 1254925 | 1123827  |
| 10 kDa heat shock protein, mitochondrial                                     | IPI00220327 | 1087186 | 1090943  |
| ATP synthase, H+ transporting, mitochondrial F0 complex, subunit d isoform a | IPI00220362 | 735180  | 184726   |
| dynactin 2                                                                   | IPI00220487 | 289505  | 20988    |
| 14-3-3 protein gamma                                                         | IPI00220503 | 11444   | 271570   |
| Isoform 2 of Nucleophosmin                                                   | IPI00220642 | 344220  | 273626   |
|                                                                              | IPI00220740 | 7538915 | 14163859 |

|                                                                                         |             |         |         |
|-----------------------------------------------------------------------------------------|-------------|---------|---------|
| ISOFORM 2 OF ALPHA-                                                                     | IPI00220797 | 94926   | 7674    |
| ATP-dependent DNA helicase 2 subunit 2                                                  | IPI00220834 | 1279050 | 2101348 |
| ISOFORM 2 OF CALPAS                                                                     | IPI00220857 | 5615    | 231564  |
| 40S ribosomal protein S9                                                                | IPI00221088 | 307482  | 231556  |
| 40S ribosomal protein S13                                                               | IPI00221089 | 400642  | 306199  |
| 40S ribosomal protein S15a                                                              | IPI00221091 | 7379    | 361620  |
| 40S ribosomal protein S16                                                               | IPI00221092 | 396555  | 279632  |
| 40S ribosomal protein S17                                                               | IPI00221093 | 713336  | 812257  |
| Isoform 2 of Tumor protein D54                                                          | IPI00221178 | 81546   | 666303  |
| Activated RNA polymerase II transcriptional coactivator p15                             | IPI00221222 | 1478400 | 867398  |
| Guanine nucleotide-binding protein G(I)/G(S)/G(O) gamma-12 subunit precursor            | IPI00221232 | 359288  | 187112  |
| similar to eukaryotic translation initiation factor 3, subunit 5 epsilon, 47kDa isoform | IPI00240909 | 0       | 184274  |
| Nardilysin                                                                              | IPI00243221 | 120891  | 6368    |
| PDCD6IP protein                                                                         | IPI00246058 | 87764   | 76159   |
| SORTING NEXIN 6 ISO                                                                     | IPI00258833 | 25719   | 63643   |
| Isoform 1 of Filamin-B                                                                  | IPI00289334 | 89939   | 224549  |
| Bifunctional purine biosynthesis protein PURH                                           | IPI00289499 | 7283    | 157428  |
| CATION-INDEPENDENT                                                                      | IPI00289819 | 73067   | 11963   |
| T-complex protein 1 subunit alpha                                                       | IPI00290566 | 335008  | 451227  |
| chaperonin containing TCP1, subunit 3 isoform b                                         | IPI00290770 | 664063  | 684710  |
| Malate dehydrogenase, mitochondrial precursor                                           | IPI00291006 | 2600850 | 3838512 |
| vinculin isoform VCL                                                                    | IPI00291175 | 903748  | 1219814 |
| Inosine-5'-monophosphate dehydrogenase 2                                                | IPI00291510 | 110635  | 105586  |
| Proteasome subunit alpha type 5                                                         | IPI00291922 | 229315  | 247627  |
| Macrophage migration inhibitory factor                                                  | IPI00293276 | 855046  | 121340  |
| Signal recognition particle 14 kDa protein                                              | IPI00293434 | 535076  | 389731  |

|                                                                                  |             |         |         |
|----------------------------------------------------------------------------------|-------------|---------|---------|
| Nuclear pore glycoprotein p62                                                    | IPI00293533 | 0       | 248562  |
| ATP-DEPENDENT RNA                                                                | IPI00293655 | 95374   | 52925   |
| Phosphoenolpyruvate carboxykinase [GTP], mitochondrial precursor                 | IPI00294380 | 67497   | 78145   |
| Cathepsin B precursor                                                            | IPI00295741 | 184027  | 116398  |
| Ubiquinol-cytochrome c reductase complex 11 kDa protein, mitochondrial precursor | IPI00296022 | 225472  | 540370  |
| Isoform Mitochondrial of Fumarate hydratase, mitochondrial precursor             | IPI00296053 | 211148  | 275491  |
| Isoform 1 of DNA-dependent protein kinase catalytic subunit                      | IPI00296337 | 493978  | 414992  |
| Chromobox protein homolog 3                                                      | IPI00297579 | 393544  | 100808  |
| T-complex protein 1 subunit beta                                                 | IPI00297779 | 800008  | 2683709 |
| Eukaryotic translation initiation factor 2 subunit 3                             | IPI00297982 | 226598  | 10550   |
| Far upstream element-binding protein 2                                           | IPI00298363 | 261566  | 470059  |
| Protein DJ-1                                                                     | IPI00298547 | 130840  | 1728039 |
| 271 kDa protein                                                                  | IPI00298994 | 400730  | 791332  |
| Proliferation-associated protein 2G4                                             | IPI00299000 | 550139  | 32907   |
| Proteasome subunit alpha type 4                                                  | IPI00299155 | 133835  | 112260  |
| Isoform 2 of Protein disulfide-isomerase A6 precursor                            | IPI00299571 | 2366195 | 1997434 |
| 60S ribosomal protein L7a                                                        | IPI00299573 | 1080944 | 589363  |
| ISOFORM 1 OF SPLICIN                                                             | IPI00301503 | 199038  | 38796   |
| filamin A, alpha                                                                 | IPI00302592 | 8190140 | 9254961 |
| Chaperonin containing TCP1, subunit 8 (Theta) variant                            | IPI00302925 | 428574  | 284144  |
| T-complex protein 1 subunit delta                                                | IPI00302927 | 280230  | 434273  |
| ATP synthase subunit beta, mitochondrial precursor                               | IPI00303476 | 2816992 | 4485483 |

|                                                                                       |             |          |          |
|---------------------------------------------------------------------------------------|-------------|----------|----------|
| Isoform B of Mannose-6-phosphate receptor-binding protein 1                           | IPI00303882 | 1475805  | 1147356  |
| Heat shock 70 kDa protein 1                                                           | IPI00304925 | 1986320  | 1832613  |
| Ubiquinol-cytochrome-c reductase complex core protein 2, mitochondrial precursor      | IPI00305383 | 178166   | 73360    |
| EXPORTIN-T                                                                            | IPI00306290 | 40466    | 34226    |
| 60S ribosomal protein L24                                                             | IPI00306332 | 167032   | 160306   |
| NOL1/NOP2/Sun domain family 2 protein                                                 | IPI00306369 | 7666     | 156573   |
| Import inner membrane translocase subunit TIM44, mitochondrial precursor              | IPI00306516 | 70717    | 98874    |
| Isoform 1 of Tumor protein D54                                                        | IPI00306825 | 529660   | 310294   |
| Asparaginyl-tRNA synthetase, cytoplasmic                                              | IPI00306960 | 184848   | 120015   |
| Histone-binding protein RBBP4                                                         | IPI00328319 | 212414   | 71980    |
| 60S ribosomal protein L6                                                              | IPI00329389 | 192462   | 140442   |
| Threonyl-tRNA synthetase, cytoplasmic                                                 | IPI00329633 | 211159   | 217434   |
| CDNA FLJ43793 fis, clone TEST14000014, highly similar to 130 kDa leucine-rich protein | IPI00329745 | 149986   | 167767   |
| Annexin A5                                                                            | IPI00329801 | 4246092  | 5689211  |
| Von Hippel-Lindau binding protein 1                                                   | IPI00334159 | 294755   | 697583   |
| Stomatin-like protein 2                                                               | IPI00334190 | 81545    | 224831   |
| Isoform 2 of Heterogeneous nuclear ribonucleoprotein A/B                              | IPI00334587 | 621785   | 1203769  |
| 85 kDa protein                                                                        | IPI00334775 | 10759702 | 11129620 |
| Pyrroline-5-carboxylate reductase family, member 2                                    | IPI00335061 | 117934   | 85330    |
| myosin, light chain 6, alkali, smooth muscle and non-muscle isoform 1                 | IPI00335168 | 843193   | 724106   |
| Isoform 2 of Kinectin                                                                 | IPI00337736 | 192935   | 258966   |
| 60S RIBOSOMAL PROT                                                                    | IPI00375511 | 167794   | 326398   |

|                                                                    |             |          |          |
|--------------------------------------------------------------------|-------------|----------|----------|
| Interferon-induced 17 kDa protein precursor                        | IPI00375631 | 91630    | 171249   |
| ribosomal protein L11                                              | IPI00376798 | 1011816  | 3457396  |
| Heat shock protein HSP 90-alpha 2                                  | IPI00382470 | 1176793  | 1856954  |
| Proteasome activator complex subunit 2                             | IPI00384051 | 916016   | 474835   |
| COMPLEX 20 KD SUBU                                                 | IPI00386354 | 238065   | 195732   |
| Tubulin alpha-ubiquitous chain                                     | IPI00387144 | 7580185  | 12818234 |
| Isoform 1 of Calcyclin-binding protein                             | IPI00395627 | 250799   | 198837   |
| Isoform 1 of Eukaryotic translation initiation factor 3 subunit 9  | IPI00396370 | 109432   | 16252    |
| Isoform B1 of Heterogeneous nuclear ribonucleoproteins A2/B1       | IPI00396378 | 4021093  | 4058242  |
| DEAH (Asp-Glu-Ala-His) box polypeptide 15                          | IPI00396435 | 172613   | 82992    |
| Elongation factor 1-alpha 1                                        | IPI00396485 | 14104475 | 23219174 |
| similar to 60S ribosomal protein L27a                              | IPI00398135 | 984341   | 345752   |
| Putative 40-9-1 protein                                            | IPI00410034 | 15861    | 95820    |
| Isoform 1 of Plasminogen activator inhibitor 1 RNA-binding protein | IPI00410693 | 122381   | 289897   |
| Heat shock protein beta                                            | IPI00411633 | 193349   | 20637    |
| Hypothetical protein DKFZp781K1356                                 | IPI00412545 | 43249    | 73991    |
| 60S ribosomal protein L10a                                         | IPI00412579 | 97762    | 7615     |
| Ribosomal protein SA                                               | IPI00413108 | 840966   | 2454941  |
| COFILIN-2                                                          | IPI00413344 | 10622    | 189761   |
| Hypothetical protein DKFZp686I04222                                | IPI00413451 | 194312   | 195528   |
| SIMILAR TO 40S RIBOS                                               | IPI00414603 | 713336   | 812257   |
| annexin A2 isoform 1                                               | IPI00418169 | 5712325  | 9035780  |
| Vimentin                                                           | IPI00418471 | 20631435 | 25163786 |
| leucine aminopeptidase 3                                           | IPI00419237 | 85421    | 138964   |
| Isoform 1 of Heterogeneous nuclear ribonucleoprotein A3            | IPI00419373 | 133889   | 11984    |
| Peptidyl-prolyl cis-trans isomerase A                              | IPI00419585 | 5010390  | 8427294  |
| 40S ribosomal protein S3a                                          | IPI00419880 | 259088   | 103633   |



|                                                                                         |             |          |          |
|-----------------------------------------------------------------------------------------|-------------|----------|----------|
| Dihydrolipoyllysine-residue succinyltransferase component of 2-oxoglutarate dehydrogen  | IPI00420108 | 251961   | 46379    |
| ATP synthase subunit alpha, mitochondrial precursor                                     | IPI00440493 | 2473271  | 2803030  |
| CDNA FLJ16223 fis, clone CTONG3003598                                                   | IPI00442278 | 2552542  | 297718   |
| Isoform 1 of MIR-interacting saposin-like protein precursor                             | IPI00443909 | 139823   | 244246   |
| CDNA FLJ45706 fis, clone FEBRA2028457, highly similar to Nucleolin                      | IPI00444262 | 1172795  | 1280718  |
| Histone H4                                                                              | IPI00453473 | 13208503 | 8444630  |
| similar to Phosphoglycerate mutase 1 (Phosphoglycerate mutase isozyme B) (PGAM-B) (BPG- | IPI00453476 | 220322   | 715546   |
| 60S ACIDIC RIBOSOMA                                                                     | IPI00455557 | 1907605  | 2166400  |
| Scaffold attachment factor A2                                                           | IPI00456887 | 155984   | 59101    |
| similar to ribosomal protein S12                                                        | IPI00456898 | 327004   | 38505    |
| Triosephosphate isomerase 1 variant                                                     | IPI00465028 | 4182345  | 11229875 |
| Histone H3.1                                                                            | IPI00465070 | 1422158  | 70537    |
| enolase 1                                                                               | IPI00465248 | 6937801  | 1374031  |
| GARS protein                                                                            | IPI00465260 | 242076   | 507574   |
| Cytochrome c                                                                            | IPI00465315 | 286461   | 773747   |
| 60S ribosomal protein L13                                                               | IPI00465361 | 519588   | 202085   |
| 70 kDa protein                                                                          | IPI00465430 | 2276034  | 1638057  |
| Galectin-3                                                                              | IPI00465431 | 301537   | 6687     |
| Fructose-bisphosphate aldolase A                                                        | IPI00465439 | 575269   | 320607   |
| FBRNP                                                                                   | IPI00470658 | 9407     | 111920   |
| 61 kDa protein                                                                          | IPI00472102 | 9640867  | 6660736  |
| Isoform 1 of Spectrin alpha chain, brain                                                | IPI00478292 | 67649    | 22218    |
| similar to Heterogeneous nuclear ribonucleoprotein A1                                   | IPI00478539 | 2876609  | 2407037  |
| pyruvate kinase 3 isoform 1                                                             | IPI00479186 | 12167516 | 13943457 |
| heterogeneous nuclear ribonucleoprotein U isoform b                                     | IPI00479217 | 928536   | 976059   |
| Stathmin                                                                                | IPI00479997 | 195295   | 418726   |

|                                                        |             |         |         |
|--------------------------------------------------------|-------------|---------|---------|
| Vesicle-associated membrane protein 3                  | IPI00549343 | 61086   | 223740  |
| 60S ribosomal protein L3                               | IPI00550021 | 277058  | 86147   |
| Ribonuclease inhibitor                                 | IPI00550069 | 12156   | 108215  |
| Transgelin-2                                           | IPI00550363 | 1039619 | 502646  |
| Phosphoglucosyltransferase-2                           | IPI00550364 | 169647  | 180778  |
| Nuclear migration protein nudC                         | IPI00550746 | 151103  | 196753  |
| Keratin, type II cytoskeletal 8                        | IPI00554648 | 1132824 | 1394050 |
| 49 kDa protein                                         | IPI00554788 | 1756642 | 2342392 |
| Actin-related protein 2/3 complex subunit 4            | IPI00554811 | 311321  | 244346  |
| 4 KDA PROTEIN                                          | IPI00556589 | 99780   | 1051998 |
| NME1-NME2 protein                                      | IPI00604590 | 2591051 | 1568083 |
| BAG family molecular chaperone regulator 3             | IPI00641582 | 98112   | 204819  |
| Lung cancer oncogene 7                                 | IPI00641950 | 337481  | 35431   |
| Signal recognition particle 9 kDa protein              | IPI00642816 | 647741  | 128012  |
| GTP-binding nuclear protein Ran                        | IPI00643041 | 2070370 | 1061381 |
| Q5SRT2                                                 | IPI00643853 | 820631  | 3644276 |
| Transketolase                                          | IPI00643920 | 294503  | 969812  |
| Ubiquitin-activating enzyme E1                         | IPI00645078 | 1221061 | 2597624 |
| HIST2H3PS2 protein                                     | IPI00646240 | 92177   | 208576  |
| peptidylprolyl isomerase B precursor                   | IPI00646304 | 286756  | 658929  |
| similar to Splicing factor, arginine/serine-rich, 46kD | IPI00718917 | 447746  | 384700  |
| RELA protein                                           | IPI00719633 | 208121  | 442691  |
| CONSERVED HYPOTHE                                      | IPI00744848 | 93813   | 21848   |
| Ezrin                                                  | IPI00746388 | 758366  | 450436  |
| ISOFORM 4 OF HETEROC                                   | IPI00759596 | 743323  | 1240369 |
| UNCHARACTERIZED PRO                                    | IPI00759597 | 194437  | 674614  |
| ISOFORM 3 OF GAMET                                     | IPI00759598 | 569648  | 832003  |
| 40S RIBOSOMAL PROTE                                    | IPI00759599 | 568788  | 103387  |
| 19 kDa protein                                         | IPI00793696 | 167032  | 160306  |
| ATP-citrate synthase                                   | IPI00794404 | 91970   | 58105   |
| 18 kDa protein                                         | IPI00794605 | 209427  | 100897  |

| Id          | Name of protein                                                  | C2        | L2        |
|-------------|------------------------------------------------------------------|-----------|-----------|
|             |                                                                  | abundance | abundance |
| IPI00000051 | Prefoldin subunit 1                                              | 0         | 559424    |
| IPI00000105 | Major vault protein                                              | 344367    | 1075206   |
| IPI00000477 | PNAS-139                                                         | 175864    | 44535     |
| IPI00000494 | 60S ribosomal protein L5                                         | 190318    | 858670    |
| IPI00000495 | PNAS-125                                                         | 127568    | 0         |
| IPI00000684 | Isoform AGX2 of UDP-N-acetylhexosamine pyrophosphorylase         | 0         | 174917    |
| IPI00000816 | 14-3-3 protein epsilon                                           | 1021004   | 2652513   |
| IPI00000861 | Isoform 1 of LIM and SH3 domain protein 1                        | 469164    | 34660     |
| IPI00000874 | Peroxiredoxin-1                                                  | 12834388  | 3147639   |
| IPI00000875 | Elongation factor 1-gamma                                        | 3995552   | 2289820   |
| IPI00001589 | Mitochondrial import inner membrane translocase subunit Tim13    | 436957    | 101066    |
| IPI00001639 | Importin beta-1 subunit                                          | 2392749   | 273620    |
| IPI00001734 | Isoform 1 of Phosphoserine aminotransferase                      | 1126440   | 694130    |
| IPI00001890 | COATOMER SUBUNIT C                                               | 0         | 49418     |
| IPI00001960 | Chloride intracellular channel protein 4                         | 869535    | 2566799   |
| IPI00002459 | annexin VI isoform 2                                             | 64453     | 302241    |
| IPI00002520 | Serine hydroxymethyltransferase, mitochondrial precursor         | 739786    | 298692    |
| IPI00002821 | 60S ribosomal protein L14                                        | 350359    | 845966    |
| IPI00002966 | Heat shock 70 kDa protein 4                                      | 3156427   | 4395500   |
| IPI00003348 | Guanine nucleotide-binding protein G(I)/G(S)/G(T) subunit beta 2 | 14044     | 483288    |
| IPI00003362 | HSPA5 protein                                                    | 15597171  | 4496902   |
| IPI00003377 | Isoform 1 of Splicing factor, arginine/serine-rich 7             | 1741888   | 0         |
| IPI00003406 | Drebrin                                                          | 0         | 484561    |
| IPI00003565 | 26S proteasome non-ATPase regulatory subunit 10                  | 0         | 252610    |
| IPI00003815 | Rho GDP-dissociation inhibitor 1                                 | 129735    | 1287133   |
| IPI00003865 | Isoform 1 of Heat shock cognate 71 kDa protein                   | 25685352  | 15970197  |
| IPI00003918 | 60S ribosomal protein L4                                         | 1815377   | 20737     |

|             |                                                                                        |         |         |
|-------------|----------------------------------------------------------------------------------------|---------|---------|
| IPI00003925 | Isoform 1 of Pyruvate dehydrogenase E1 component subunit beta, mitochondrial precursor | 287979  | 0       |
| IPI00003935 | Histone H2B type 2-E                                                                   | 5319969 | 8650362 |
| IPI00003949 | Ubiquitin-conjugating enzyme E2 N                                                      | 1174956 | 92487   |
| IPI00004358 | Glycogen phosphorylase, brain form                                                     | 177473  | 179083  |
| IPI00004656 | Beta-2-microglobulin precursor                                                         | 898482  | 50648   |
| IPI00004902 | electron-transfer-flavoprotein, beta polypeptide isoform 1                             | 22080   | 546885  |
| IPI00005102 | Spermine synthase                                                                      | 0       | 171450  |
| IPI00005154 | FACT complex subunit SSRP1                                                             | 151572  | 322042  |
| IPI00005158 | Lon protease homolog, mitochondrial precursor                                          | 354051  | 0       |
| IPI00005159 | Actin-like protein 2                                                                   | 470675  | 246828  |
| IPI00005161 | Actin-related protein 2/3 complex subunit 2                                            | 487236  | 660268  |
| IPI00005198 | Interleukin enhancer-binding factor 2                                                  | 1866265 | 41222   |
| IPI00005537 | 39S ribosomal protein L12, mitochondrial precursor                                     | 1072382 | 56911   |
| IPI00005613 | Splicing factor U2AF 35 kDa subunit                                                    | 235484  | 0       |
| IPI00005614 | Isoform Long of Spectrin beta chain, brain 1                                           | 0       | 606975  |
| IPI00005648 | Scaffold attachment factor B2                                                          | 231690  | 0       |
| IPI00005719 | RAB1A, member RAS oncogene family                                                      | 97497   | 2184568 |
| IPI00005969 | F-actin capping protein alpha-1 subunit                                                | 1312390 | 0       |
| IPI00006052 | Prefoldin subunit 2                                                                    | 859760  | 835646  |
| IPI00006181 | Eukaryotic translation initiation factor 3 subunit 7                                   | 348639  | 21276   |
| IPI00006211 | VAMP-associated protein B/C                                                            | 339756  | 0       |
| IPI00006362 | Isoform 2 of Endothelial differentiation-related factor 1                              | 286888  | 58694   |
| IPI00006482 | Isoform Long of Sodium/potassium-transporting ATPase alpha-1 chain precursor           | 371487  | 699263  |
| IPI00006684 | Isoform 4 of Apoptosis inhibitor 5                                                     | 154416  | 0       |
| IPI00006723 | WD repeat protein 57                                                                   | 240818  | 0       |

|             |                                                                            |          |         |
|-------------|----------------------------------------------------------------------------|----------|---------|
| IPI00007052 | Mitochondrial fission 1 protein                                            | 115498   | 28736   |
| IPI00007074 | Tyrosyl-tRNA synthetase, cytoplasmic                                       | 404917   | 324705  |
| IPI00007175 | Isoform 1 of 60S ribosome subunit biogenesis protein NIP7 homolog          | 128452   | 0       |
| IPI00007188 | ADP/ATP translocase 2                                                      | 6066679  | 1280728 |
| IPI00007402 | 120 kDa protein                                                            | 416324   | 0       |
| IPI00007423 | Isoform 1 of Acidic leucine-rich nuclear phosphoprotein 32 family member B | 1799088  | 981491  |
| IPI00007611 | ATP synthase O subunit, mitochondrial precursor                            | 50246    | 505978  |
| IPI00007752 | Tubulin beta-2C chain                                                      | 1488606  | 2966295 |
| IPI00007755 | Ras-related protein Rab-21                                                 | 0        | 114829  |
| IPI00007764 | hematological and neurological expressed 1 isoform 1                       | 213142   | 0       |
| IPI00007765 | Stress-70 protein, mitochondrial precursor                                 | 10811473 | 3165083 |
| IPI00007928 | Pre-mRNA-processing-splicing factor 8                                      | 155164   | 0       |
| IPI00007935 | PDZ and LIM domain protein 5                                               | 201120   | 343114  |
| IPI00008240 | Methionyl-tRNA synthetase, cytoplasmic                                     | 791832   | 0       |
| IPI00008274 | Adenylyl cyclase-associated protein 1                                      | 1677209  | 3339685 |
| IPI00008380 | Serine/threonine-protein phosphatase 2A catalytic subunit alpha isoform    | 233964   | 262659  |
| IPI00008418 | Isoform 1 of Diablo homolog, mitochondrial precursor                       | 245467   | 0       |
| IPI00008433 | 40S ribosomal protein S5                                                   | 669465   | 0       |
| IPI00008438 | 40S ribosomal protein S10                                                  | 484500   | 31973   |
| IPI00008494 | Intercellular adhesion molecule 1 precursor                                | 1089163  | 1757194 |
| IPI00008524 | Isoform 1 of Polyadenylate-binding protein 1                               | 1445901  | 1715586 |
| IPI00008527 | 60S acidic ribosomal protein P1                                            | 4496213  | 12996   |
| IPI00008529 | 60S acidic ribosomal protein P2                                            | 5873147  | 0       |

|             |                                                                                        |         |         |
|-------------|----------------------------------------------------------------------------------------|---------|---------|
| IPI00008530 | 60S acidic ribosomal protein P0                                                        | 5240016 | 225198  |
| IPI00008552 | Thioredoxin-like protein 2                                                             | 30122   | 566754  |
| IPI00008557 | insulin-like growth factor 2 mRNA binding protein 1                                    | 140280  | 0       |
| IPI00008575 | Isoform 1 of KH domain-containing, RNA-binding, signal transduction-associated protein | 883985  | 33675   |
| IPI00008868 | Microtubule-associated protein 1B                                                      | 130297  | 0       |
| IPI00008918 | Isoform Beta of LIM domain and actin-binding protein 1                                 | 54313   | 40332   |
| IPI00008998 | HSPC121                                                                                | 156160  | 43153   |
| IPI00009030 | Isoform LAMP-2A of Lysosome-associated membrane glycoprotein 2 precursor               | 927169  | 0       |
| IPI00009032 | Lupus La protein                                                                       | 1101471 | 1050417 |
| IPI00009071 | Isoform 3 of FUS-interacting serine-arginine-rich protein 1                            | 0       | 352239  |
| IPI00009104 | RuvB-like 2                                                                            | 373726  | 90417   |
| IPI00009236 | caveolin 1                                                                             | 0       | 535383  |
| IPI00009305 | Glucosamine-6-phosphate isomerase                                                      | 814609  | 383076  |
| IPI00009342 | Ras GTPase-activating-like protein IQGAP1                                              | 3428830 | 1081327 |
| IPI00009507 | Isoform 1 of Synaptophysin-like protein 1                                              | 57764   | 195982  |
| IPI00009634 | Sulfide:quinone oxidoreductase, mitochondrial precursor                                | 637998  | 13969   |
| IPI00009771 | Lamin B2                                                                               | 215234  | 63352   |
| IPI00009790 | 6-phosphofructokinase type C                                                           | 1313020 | 729420  |
| IPI00009904 | Protein disulfide-isomerase A4 precursor                                               | 1038877 | 1037987 |
| IPI00009960 | Isoform 1 of Mitochondrial inner membrane protein                                      | 304131  | 0       |
| IPI00010105 | Eukaryotic translation initiation factor 6                                             | 654625  | 729787  |
| IPI00010153 | 60S ribosomal protein L23                                                              | 0       | 1040080 |
| IPI00010157 | S-adenosylmethionine synthetase isoform type-2                                         | 715688  | 0       |
| IPI00010182 | diazepam binding inhibitor isoform 3                                                   | 907609  | 0       |

|             |                                                                         |          |          |
|-------------|-------------------------------------------------------------------------|----------|----------|
| IPI00010201 | PROTEASOME 26S NOI                                                      | 225164   | 0        |
| IPI00010271 | Isoform A of Ras-related C3 botulinum toxin substrate 1 precursor       | 132205   | 297876   |
| IPI00010415 | Isoform 1 of Cytosolic acyl coenzyme A thioester hydrolase              | 533051   | 86049    |
| IPI00010676 | Isoform 1 of Urokinase plasminogen activator surface receptor precursor | 6224     | 136245   |
| IPI00010706 | Glutathione synthetase                                                  | 21814    | 69967    |
| IPI00010720 | T-complex protein 1 subunit epsilon                                     | 1291829  | 90414    |
| IPI00010740 | Isoform Long of Splicing factor, proline- and glutamine-rich            | 1419818  | 1189006  |
| IPI00010779 | Tropomyosin 4                                                           | 72536    | 1821606  |
| IPI00010796 | Protein disulfide-isomerase precursor                                   | 1747788  | 3964480  |
| IPI00010810 | Electron transfer flavoprotein subunit alpha, mitochondrial precursor   | 1149227  | 17373    |
| IPI00010896 | Chloride intracellular channel protein 1                                | 5642700  | 3059257  |
| IPI00011126 | 26S protease regulatory subunit 4                                       | 498746   | 79696    |
| IPI00011200 | D-3-phosphoglycerate dehydrogenase                                      | 329788   | 420472   |
| IPI00011201 | NAD-dependent malic enzyme, mitochondrial precursor                     | 0        | 345163   |
| IPI00011253 | 40S ribosomal protein S3                                                | 4278545  | 936987   |
| IPI00011274 | heterogeneous nuclear ribonucleoprotein D-like                          | 11932    | 2618376  |
| IPI00011284 | Isoform Membrane-bound of Catechol O-methyltransferase                  | 200964   | 0        |
| IPI00011302 | CD59 glycoprotein precursor                                             | 3975     | 289311   |
| IPI00011454 | Isoform 2 of Neutral alpha-glucosidase AB precursor                     | 912580   | 1965552  |
| IPI00011603 | 26S proteasome non-ATPase regulatory subunit 3                          | 97235    | 475472   |
| IPI00011654 | Tubulin beta chain                                                      | 16844412 | 10976338 |
| IPI00012011 | Cofilin-1                                                               | 6328425  | 198062   |
| IPI00012066 | poly(rC)-binding protein 2 isoform b                                    | 1204441  | 2665297  |
| IPI00012074 | Heterogeneous nuclear ribonucleoprotein R                               | 1716705  | 999125   |

|             |                                                            |         |         |
|-------------|------------------------------------------------------------|---------|---------|
| IPI00012102 | N-acetylglucosamine-6-sulfatase precursor                  | 30200   | 238690  |
| IPI00012341 | Isoform SRP40-1 of Splicing factor, arginine/serine-rich 5 | 0       | 141156  |
| IPI00012345 | Isoform SRP55-1 of Splicing factor, arginine/serine-rich 6 | 579577  | 56460   |
| IPI00012382 | U1 small nuclear ribonucleoprotein A                       | 0       | 571456  |
| IPI00012442 | Ras GTPase-activating protein-binding protein 1            | 8387    | 595572  |
| IPI00012493 | 40S RIBOSOMAL PROT                                         | 636290  | 0       |
| IPI00012503 | Isoform Sap-mu-0 of Proactivator polypeptide precursor     | 1174932 | 1717092 |
| IPI00012575 | Pirin                                                      | 0       | 133800  |
| IPI00012750 | 40S ribosomal protein S25                                  | 705267  | 1119587 |
| IPI00012772 | 60S ribosomal protein L8                                   | 416536  | 262266  |
| IPI00012795 | Eukaryotic translation initiation factor 3 subunit 2       | 233675  | 618741  |
| IPI00013122 | Hsp90 co-chaperone Cdc37                                   | 0       | 1083739 |
| IPI00013296 | 40S ribosomal protein S18                                  | 262657  | 1424301 |
| IPI00013297 | 28 kDa heat- and acid-stable phosphoprotein                | 5660    | 572425  |
| IPI00013415 | 40S ribosomal protein S7                                   | 1798804 | 0       |
| IPI00013452 | glutamyl-prolyl tRNA synthetase                            | 584675  | 90549   |
| IPI00013508 | Alpha-actinin-1                                            | 9412755 | 4326922 |
| IPI00013808 | Alpha-actinin-4                                            | 912757  | 1639204 |
| IPI00013877 | Isoform 1 of Heterogeneous nuclear ribonucleoprotein H3    | 503168  | 332782  |
| IPI00013881 | heterogeneous nuclear ribonucleoprotein H1                 | 1624289 | 2393595 |
| IPI00013891 | Isoform Long of Transformer-2 protein homolog              | 225348  | 346148  |
| IPI00013894 | Stress-induced-phosphoprotein 1                            | 631704  | 1738934 |
| IPI00013895 | Protein S100-A11                                           | 314604  | 52055   |
| IPI00013991 | Isoform 1 of Tropomyosin beta chain                        | 1235534 | 0       |
| IPI00014177 | Septin-2                                                   | 455981  | 423364  |



|             |                                                                                |         |         |
|-------------|--------------------------------------------------------------------------------|---------|---------|
| IPI00014230 | Complement component 1 Q subcomponent-binding protein, mitochondrial precursor | 994563  | 1744177 |
| IPI00014238 | Lysyl-tRNA synthetase                                                          | 16954   | 494902  |
| IPI00014263 | eukaryotic translation initiation factor 4H isoform 1                          | 29002   | 807252  |
| IPI00014537 | Isoform 1 of Calumenin precursor                                               | 595793  | 0       |
| IPI00014587 | Isoform Brain of Clathrin light chain A                                        | 396100  | 0       |
| IPI00014850 | Astrocytic phosphoprotein PEA-15                                               | 57412   | 0       |
| IPI00015018 | Inorganic pyrophosphatase                                                      | 287501  | 474245  |
| IPI00015029 | Prostaglandin E synthase 3                                                     | 2967247 | 60208   |
| IPI00015077 | Eukaryotic translation initiation factor 1                                     | 35462   | 1010579 |
| IPI00015148 | Ras-related protein Rap-1b precursor                                           | 405756  | 379902  |
| IPI00015262 | Calponin-2                                                                     | 805838  | 477352  |
| IPI00015361 | Prefoldin subunit 5                                                            | 399378  | 308598  |
| IPI00015671 | tubulin, alpha-like 3                                                          | 682151  | 0       |
| IPI00015842 | Reticulocalbin-1 precursor                                                     | 771987  | 361276  |
| IPI00015911 | Dihydrolipoyl dehydrogenase, mitochondrial precursor                           | 816598  | 1752138 |
| IPI00015953 | Isoform 1 of Nucleolar RNA helicase 2                                          | 1031500 | 1937193 |
| IPI00016342 | Ras-related protein Rab-7                                                      | 106368  | 254846  |
| IPI00016513 | Ras-related protein Rab-10                                                     | 10493   | 207349  |
| IPI00016610 | Poly(rC)-binding protein 1                                                     | 2812881 | 612939  |
| IPI00016613 | CSNK2A1 PROTEIN.                                                               | 101008  | 65918   |
| IPI00016801 | Glutamate dehydrogenase 1, mitochondrial precursor                             | 639288  | 0       |
| IPI00016910 | Eukaryotic translation initiation factor 3 subunit 8                           | 210657  | 0       |
| IPI00017297 | Matrin-3                                                                       | 1861043 | 457966  |
| IPI00017334 | Prohibitin                                                                     | 3111023 | 909656  |
| IPI00017344 | Ras-related protein Rab-5B                                                     | 0       | 540807  |
| IPI00017373 | Replication protein A 14 kDa subunit                                           | 268919  | 33812   |
| IPI00017448 | 40S ribosomal protein S21                                                      | 1069263 | 423634  |

|             |                                                                                      |          |         |
|-------------|--------------------------------------------------------------------------------------|----------|---------|
| IPI00017469 | Sepiapterin reductase                                                                | 128537   | 0       |
| IPI00017510 | Cytochrome c oxidase subunit 2                                                       | 130618   | 0       |
| IPI00017596 | Microtubule-associated protein RP/EB family member 1                                 | 583025   | 47282   |
| IPI00017617 | Probable ATP-dependent RNA helicase DDX5                                             | 1457756  | 420001  |
| IPI00017672 | CDNA FLJ25678 fis, clone TST04067, highly similar to PURINE NUCLEOSIDE PHOSPHORYLASE | 1171197  | 1538450 |
| IPI00017704 | Coactosin-like protein                                                               | 107800   | 0       |
| IPI00017726 | hydroxysteroid (17-beta) dehydrogenase 10 isoform 1                                  | 203561   | 570108  |
| IPI00017799 | Thioredoxin, mitochondrial precursor                                                 | 0        | 100020  |
| IPI00017855 | Aconitate hydratase, mitochondrial precursor                                         | 380688   | 438686  |
| IPI00017964 | Small nuclear ribonucleoprotein Sm D3                                                | 728024   | 0       |
| IPI00018140 | Isoform 1 of Heterogeneous nuclear ribonucleoprotein Q                               | 316207   | 442638  |
| IPI00018146 | 14-3-3 protein theta                                                                 | 12297906 | 1991202 |
| IPI00018206 | Aspartate aminotransferase, mitochondrial precursor                                  | 1555809  | 721295  |
| IPI00018246 | Isoform 1 of Hexokinase-1                                                            | 59390    | 145870  |
| IPI00018352 | Ubiquitin carboxyl-terminal hydrolase isozyme L1                                     | 538260   | 298465  |
| IPI00018398 | 26S protease regulatory subunit 6A                                                   | 0        | 326557  |
| IPI00018452 | COPINE I                                                                             | 129282   | 33407   |
| IPI00018465 | T-complex protein 1 subunit eta                                                      | 1011955  | 537641  |
| IPI00018522 | Isoform 1 of Protein arginine N-methyltransferase 1                                  | 220432   | 69262   |
| IPI00018534 | Histone H2B type 1-L                                                                 | 12303517 | 6941505 |
| IPI00018783 | Inosine triphosphate pyrophosphatase                                                 | 0        | 212021  |
| IPI00018873 | Isoform 1 of Nicotinamide phosphoribosyltransferase                                  | 0        | 852757  |
| IPI00019359 | Keratin, type I cytoskeletal 9                                                       | 849592   | 154105  |

|             |                                                            |          |          |
|-------------|------------------------------------------------------------|----------|----------|
| IPI00019385 | Translocon-associated protein, delta subunit precursor     | 31480    | 299057   |
| IPI00019502 | Myosin-9                                                   | 11268782 | 5332464  |
| IPI00019599 | Isoform 1 of Ubiquitin-conjugating enzyme E2 variant 1     | 300952   | 348558   |
| IPI00019755 | Glutathione transferase omega-1                            | 262687   | 750169   |
| IPI00019932 | ubiquitin-conjugating enzyme E2D 2 isoform 2               | 526544   | 0        |
| IPI00020042 | Isoform 1 of 26S protease regulatory subunit 6B            | 0        | 136845   |
| IPI00020101 | H2B histone family, member A                               | 11041274 | 29176898 |
| IPI00020194 | Isoform Short of TATA-binding protein-associated factor 2N | 8092     | 567674   |
| IPI00020530 | THIOESTERASE SUPERFAMILY                                   | 396668   | 0        |
| IPI00020599 | Calreticulin precursor                                     | 1180549  | 3049429  |
| IPI00020956 | Hepatoma-derived growth factor                             | 1050576  | 34453    |
| IPI00020984 | Calnexin precursor                                         | 2355235  | 1195429  |
| IPI00021048 | Isoform 1 of Myoferlin                                     | 40804    | 0        |
| IPI00021187 | Isoform 1 of RuvB-like 1                                   | 29337    | 499055   |
| IPI00021263 | 14-3-3 protein zeta/delta                                  | 19699    | 27349958 |
| IPI00021266 | 60S ribosomal protein L23a                                 | 1047268  | 3307098  |
| IPI00021290 | ATP-citrate synthase                                       | 472184   | 851427   |
| IPI00021347 | Ubiquitin-conjugating enzyme E2 L3                         | 828601   | 0        |
| IPI00021405 | Isoform A of Lamin-A/C                                     | 6577512  | 15291446 |
| IPI00021416 | 40 kDa protein                                             | 753636   | 33892    |
| IPI00021428 | Actin, alpha skeletal muscle                               | 8465375  | 19964    |
| IPI00021439 | Actin, cytoplasmic 1                                       | 47214885 | 71853297 |
| IPI00021700 | PROLIFERATING CELL                                         | 161735   | 0        |
| IPI00021728 | Eukaryotic translation initiation factor 2 subunit 2       | 414191   | 0        |
| IPI00021766 | Isoform 1 of Reticulon-4                                   | 793430   | 1066643  |
| IPI00021828 | Cystatin B                                                 | 2424987  | 398110   |
| IPI00021840 | 40S ribosomal protein S6                                   | 619460   | 539611   |
| IPI00021926 | 26S protease regulatory subunit S10B                       | 875028   | 557349   |
| IPI00022143 | Isoform 1 of Protein FAM62A                                | 0        | 283727   |
| IPI00022314 | Superoxide dismutase [Mn], mitochondrial precursor         | 617504   | 0        |

|             |                                                                  |          |         |
|-------------|------------------------------------------------------------------|----------|---------|
| IPI00022442 | Acyl carrier protein, mitochondrial precursor                    | 208810   | 661346  |
| IPI00022462 | TRANSFERRIN RECEPTOR                                             | 90423    | 200402  |
| IPI00022608 | Sortilin-related receptor precursor                              | 9938     | 241336  |
| IPI00022694 | Isoform Rpn10A of 26S proteasome non-ATPase regulatory subunit 4 | 158292   | 18862   |
| IPI00022744 | Isoform 1 of Exportin-2                                          | 11176602 | 881182  |
| IPI00022774 | Transitional endoplasmic reticulum ATPase                        | 1796203  | 4724518 |
| IPI00022793 | Trifunctional enzyme beta subunit, mitochondrial precursor       | 1001426  | 1297324 |
| IPI00022830 | Isoform 2 of NSFL1 cofactor p47                                  | 0        | 118352  |
| IPI00022970 | Nucleoprotein TPR                                                | 146366   | 19603   |
| IPI00023048 | Elongation factor 1-delta                                        | 2404247  | 2891347 |
| IPI00023598 | Tubulin beta-4 chain                                             | 0        | 462588  |
| IPI00023640 | Programmed cell death protein 5                                  | 332211   | 420964  |
| IPI00023748 | Nascent polypeptide-associated complex subunit alpha             | 2335120  | 87716   |
| IPI00023785 | Isoform 1 of Probable ATP-dependent RNA helicase DDX17           | 272997   | 3235222 |
| IPI00023860 | Nucleosome assembly protein 1-like 1                             | 3048309  | 1784655 |
| IPI00023919 | 26S protease regulatory subunit 8                                | 328315   | 508573  |
| IPI00024067 | clathrin heavy chain 1                                           | 8173303  | 7342708 |
| IPI00024145 | Isoform 1 of Voltage-dependent anion-selective channel protein 2 | 1576761  | 602778  |
| IPI00024157 | FK506-binding protein 3                                          | 1750267  | 1412430 |
| IPI00024175 | Isoform 1 of Proteasome subunit alpha type 7                     | 920374   | 472882  |
| IPI00024282 | Ras-related protein Rab-8B                                       | 1599467  | 24330   |
| IPI00024320 | Putative RNA-binding protein 3                                   | 9275     | 185130  |
| IPI00024364 | Transportin 1 (Importin beta-2)                                  | 15882    | 551419  |
| IPI00024664 | Isoform Long of Ubiquitin carboxyl-terminal hydrolase 5          | 310122   | 0       |

|             |                                                                                         |          |         |
|-------------|-----------------------------------------------------------------------------------------|----------|---------|
| IPI00024911 | Endoplasmic reticulum protein ERp29 precursor                                           | 84520    | 0       |
| IPI00024915 | Isoform Mitochondrial of Peroxiredoxin-5, mitochondrial precursor                       | 4080635  | 2050875 |
| IPI00024919 | Thioredoxin-dependent peroxide reductase, mitochondrial precursor                       | 2448290  | 2576053 |
| IPI00024933 | 60S ribosomal protein L12                                                               | 2442329  | 3818496 |
| IPI00024989 | Protein-L-isoaspartate (D-aspartate) O-methyltransferase                                | 187794   | 0       |
| IPI00024993 | Enoyl-CoA hydratase, mitochondrial precursor                                            | 38394    | 1942555 |
| IPI00025019 | Proteasome subunit beta type 1 precursor                                                | 575246   | 239437  |
| IPI00025039 | rRNA 2'-O-methyltransferase fibrillarin                                                 | 232900   | 0       |
| IPI00025084 | Calpain small subunit 1                                                                 | 161871   | 256932  |
| IPI00025091 | 40S ribosomal protein S11                                                               | 136132   | 1120961 |
| IPI00025252 | Protein disulfide-isomerase A3 precursor                                                | 3551308  | 3320934 |
| IPI00025273 | Isoform Long of Trifunctional purine biosynthetic protein adenosine-3                   | 464126   | 74871   |
| IPI00025366 | Citrate synthase, mitochondrial precursor                                               | 27390    | 1073038 |
| IPI00025491 | Eukaryotic initiation factor 4A-I                                                       | 3491175  | 4468320 |
| IPI00025512 | Heat-shock protein beta-1                                                               | 10252533 | 1509361 |
| IPI00025698 | LIM domain kinase 2 isoform 1                                                           | 153199   | 15258   |
| IPI00025815 | TAR DNA-binding protein 43                                                              | 258885   | 0       |
| IPI00025849 | Acidic leucine-rich nuclear phosphoprotein 32 family member A                           | 745841   | 4466638 |
| IPI00025874 | Dolichyl-diphosphooligosaccharide--protein glycosyltransferase 67 kDa subunit precursor | 556207   | 298961  |
| IPI00026054 | Isoform 1 of MAP kinase-activated protein kinase 2                                      | 0        | 350271  |
| IPI00026087 | Barrier-to-autointegration factor                                                       | 1398684  | 252937  |
| IPI00026154 | Glucosidase 2 subunit beta precursor                                                    | 2079535  | 1758793 |

|             |                                                                               |         |         |
|-------------|-------------------------------------------------------------------------------|---------|---------|
| IPI00026167 | NHP2-like protein 1                                                           | 304391  | 29245   |
| IPI00026182 | F-actin capping protein alpha-2 subunit                                       | 252825  | 72540   |
| IPI00026185 | Isoform 1 of F-actin capping protein subunit beta                             | 623374  | 35780   |
| IPI00026202 | 60S ribosomal protein L18a                                                    | 693323  | 1165947 |
| IPI00026216 | Puromycin-sensitive aminopeptidase                                            | 196226  | 169857  |
| IPI00026302 | 60S ribosomal protein L31                                                     | 1259504 | 31052   |
| IPI00026570 | Cytochrome c oxidase polypeptide VIIa-liver/heart, mitochondrial precursor    | 371895  | 603576  |
| IPI00026665 | Glutaminyl-tRNA synthetase                                                    | 0       | 292576  |
| IPI00026781 | Fatty acid synthase                                                           | 243609  | 1893812 |
| IPI00026970 | FACT complex subunit SPT16                                                    | 131525  | 269700  |
| IPI00027107 | Tu translation elongation factor, mitochondrial                               | 2385926 | 2773807 |
| IPI00027230 | Endoplasmic precursor                                                         | 6718751 | 5856843 |
| IPI00027252 | Prohibitin-2                                                                  | 1899522 | 382316  |
| IPI00027285 | Isoform SM-B' of Small nuclear ribonucleoprotein-associated proteins B and B' | 223469  | 0       |
| IPI00027442 | Alanyl-tRNA synthetase, cytoplasmic                                           | 561934  | 1217441 |
| IPI00027493 | 4F2 cell-surface antigen heavy chain                                          | 157843  | 230700  |
| IPI00027497 | Glucose-6-phosphate isomerase                                                 | 273748  | 0       |
| IPI00027626 | T-complex protein 1 subunit zeta                                              | 870812  | 972387  |
| IPI00027809 | Protein phosphatase 3 (Formerly 2B), catalytic subunit, beta isoform          | 289179  | 0       |
| IPI00027834 | heterogeneous nuclear ribonucleoprotein L isoform a                           | 1726991 | 1152321 |
| IPI00028004 | Proteasome subunit beta type 3                                                | 463880  | 25732   |
| IPI00028006 | Proteasome subunit beta type 2                                                | 45369   | 559303  |
| IPI00028055 | Transmembrane emp24 domain-containing protein 10 precursor                    | 122625  | 0       |
| IPI00028091 | Actin-like protein 3                                                          | 1768376 | 987709  |
| IPI00028109 | Dpy-30-like protein                                                           | 34318   | 0       |

|             |                                                                                    |         |          |
|-------------|------------------------------------------------------------------------------------|---------|----------|
| IPI00028376 | Mitochondrial import inner membrane translocase subunit Tim8 A                     | 247277  | 0        |
| IPI00028888 | Isoform 1 of Heterogeneous nuclear ribonucleoprotein D0                            | 3210044 | 7449357  |
| IPI00029012 | Eukaryotic translation initiation factor 3 subunit 10                              | 190225  | 365655   |
| IPI00029079 | GMP synthase                                                                       | 0       | 226364   |
| IPI00029133 | ATP SYNTHASE SUBUN                                                                 | 324950  | 419136   |
| IPI00029264 | Cytochrome c1, heme protein, mitochondrial precursor                               | 402332  | 290479   |
| IPI00029444 | UPF0160 protein MYG1                                                               | 193974  | 0        |
| IPI00029468 | Alpha-centractin                                                                   | 758159  | 0        |
| IPI00029601 | Src substrate cortactin                                                            | 822563  | 116516   |
| IPI00029623 | Proteasome subunit alpha type 6                                                    | 878660  | 192319   |
| IPI00029737 | Isoform Long of Long-chain-fatty-acid--CoA ligase 4                                | 854975  | 0        |
| IPI00029740 | sorting nexin 3                                                                    | 308537  | 0        |
| IPI00029750 | Isoform 1 of 40S ribosomal protein S24                                             | 573883  | 0        |
| IPI00030154 | Proteasome activator complex subunit 1                                             | 1282262 | 319032   |
| IPI00030179 | 60S ribosomal protein L7                                                           | 1964473 | 775731   |
| IPI00030243 | Isoform 1 of Proteasome activator complex subunit 3                                | 165076  | 0        |
| IPI00030275 | Heat shock protein 75 kDa, mitochondrial precursor                                 | 1889393 | 15113216 |
| IPI00030304 | Ras-related protein Rab-6C                                                         | 5694    | 191355   |
| IPI00030363 | Acetyl-CoA acetyltransferase, mitochondrial precursor                              | 106356  | 0        |
| IPI00030702 | Isoform 1 of Isocitrate dehydrogenase [NAD] subunit alpha, mitochondrial precursor | 296256  | 473080   |
| IPI00030706 | Activator of 90 kDa heat shock protein ATPase homolog 1                            | 499945  | 621483   |
| IPI00030910 | GPI-anchored membrane protein 1                                                    | 149962  | 16723    |
| IPI00031030 | Isoform 1 of Amyloid-like protein 2 precursor                                      | 0       | 44958    |
| IPI00031045 | destrin isoform b                                                                  | 2880    | 597744   |

|             |                                                                  |         |         |
|-------------|------------------------------------------------------------------|---------|---------|
| IPI00031131 | Adipocyte plasma membrane-associated protein                     | 446666  | 47934   |
| IPI00031169 | Ras-related protein Rab-2A                                       | 50210   | 436003  |
| IPI00031461 | Rab GDP dissociation inhibitor beta                              | 1015677 | 548927  |
| IPI00031522 | Trifunctional enzyme subunit alpha, mitochondrial precursor      | 1939375 | 1215272 |
| IPI00031556 | Splicing factor U2AF 65 kDa subunit                              | 0       | 356508  |
| IPI00031651 | MGC11257 protein                                                 | 0       | 278046  |
| IPI00031691 | 60S ribosomal protein L9                                         | 712311  | 1817684 |
| IPI00031772 | Normal mucosa of esophagus-specific gene 1 protein               | 475654  | 0       |
| IPI00031801 | Isoform 1 of DNA-binding protein A                               | 693276  | 1427538 |
| IPI00031804 | Isoform 1 of Voltage-dependent anion-selective channel protein 3 | 1247850 | 307161  |
| IPI00031836 | Developmentally-regulated GTP-binding protein 1                  | 31371   | 256298  |
| IPI00032140 | Serpin H1 precursor                                              | 1497890 | 685766  |
| IPI00032406 | DnaJ homolog subfamily A member 2                                | 0       | 93134   |
| IPI00032460 | U6 snRNA-associated Sm-like protein LSm2                         | 0       | 455598  |
| IPI00032826 | Hsc70-interacting protein                                        | 1368213 | 893994  |
| IPI00033025 | Isoform 1 of Septin-7                                            | 252803  | 853811  |
| IPI00033494 | Myosin regulatory light chain                                    | 1216275 | 1331171 |
| IPI00034319 | Isoform A of Protein CutA precursor                              | 261320  | 0       |
| IPI00037448 | Glyoxylate reductase/hydroxypyruvate reductase                   | 203478  | 0       |
| IPI00045109 | Histone H2A type 1-A                                             | 317769  | 0       |
| IPI00059292 | Protein mago nashi homolog 2                                     | 174548  | 0       |
| IPI00059366 | H2A histone family, member Y isoform 2                           | 790356  | 75053   |
| IPI00060181 | EF-hand domain-containing protein 2                              | 112256  | 0       |
| IPI00061178 | RNA binding motif protein, X-linked-like 1                       | 808582  | 0       |
| IPI00061525 | Glucosamine 6-phosphate N-acetyltransferase                      | 10664   | 406268  |
| IPI00062814 | Chromosome 5 open reading frame 30                               | 180387  | 16146   |



|             |                                                                                         |         |         |
|-------------|-----------------------------------------------------------------------------------------|---------|---------|
| IPI00063130 | MBC3205                                                                                 | 565177  | 703307  |
| IPI00064328 | protein arginine methyltransferase 5 isoform b                                          | 0       | 152903  |
| IPI00072377 | Isoform 1 of Protein SET                                                                | 0       | 3818163 |
| IPI00074587 | Isoform 1 of FUS-interacting serine-arginine-rich protein 1                             | 135800  | 0       |
| IPI00075248 | Calmodulin                                                                              | 2351247 | 4675294 |
| IPI00100160 | Isoform 1 of Cullin-associated NEDD8-dissociated protein 1                              | 931299  | 630250  |
| IPI00100667 | 39S ribosomal protein L24, mitochondrial precursor                                      | 30453   | 16909   |
| IPI00103525 | paraspeckle protein 1                                                                   | 5374    | 206555  |
| IPI00103994 | Leucyl-tRNA synthetase, cytoplasmic                                                     | 481820  | 840016  |
| IPI00105598 | Proteasome 26S non-ATPase subunit 11 variant (Fragment)                                 | 1391622 | 392464  |
| IPI00140827 | similar to SMT3 suppressor of mif two 3 homolog 2                                       | 232710  | 50666   |
| IPI00141318 | Isoform 1 of Cytoskeleton-associated protein 4                                          | 326783  | 457519  |
| IPI00154451 | Isoform 1 of MMS19-like protein                                                         | 0       | 55201   |
| IPI00160021 | HIRA interacting protein 5 isoform 1                                                    | 128200  | 0       |
| IPI00163187 | Fascin                                                                                  | 432712  | 0       |
| IPI00165393 | Acidic leucine-rich nuclear phosphoprotein 32 family member E                           | 510078  | 788754  |
| IPI00168184 | CDNA FLJ34068 fis, clone FCBBF3001918, highly similar to SERINE/THREONINE PROTEIN PHOSP | 551786  | 0       |
| IPI00168479 | apolipoprotein A-I binding protein precursor                                            | 157911  | 0       |
| IPI00169383 | Phosphoglycerate kinase 1                                                               | 7042190 | 3845838 |
| IPI00170692 | Vesicle-associated membrane protein-associated protein A                                | 37573   | 561372  |
| IPI00171199 | proteasome alpha 3 subunit isoform 2                                                    | 384737  | 755797  |
| IPI00171611 | Histone H3.2                                                                            | 5121131 | 8661947 |
| IPI00171903 | heterogeneous nuclear ribonucleoprotein M isoform a                                     | 2455923 | 2165222 |

|             |                                                                                     |          |          |
|-------------|-------------------------------------------------------------------------------------|----------|----------|
| IPI00175098 | similar to ribosomal protein L10                                                    | 33337    | 1076792  |
| IPI00176662 | 9 kDa protein                                                                       | 1760     | 491634   |
| IPI00177728 | Cytosolic nonspecific dipeptidase                                                   | 104102   | 0        |
| IPI00177817 | Isoform SERCA2A of Sarcoplasmic/endoplasmic reticulum calcium ATPase 2              | 272669   | 0        |
| IPI00178083 | 29 kDa protein                                                                      | 55171    | 7160548  |
| IPI00178352 | Isoform 1 of Filamin-C                                                              | 333903   | 1321199  |
| IPI00178431 | ATP-dependent DNA helicase Q1                                                       | 244091   | 0        |
| IPI00178440 | Elongation factor 1-beta                                                            | 2661565  | 430611   |
| IPI00179330 | ubiquitin and ribosomal protein S27a precursor                                      | 19402155 | 16900808 |
| IPI00179589 | Myotrophin                                                                          | 34202    | 460894   |
| IPI00179953 | Isoform 1 of Nuclear autoantigenic sperm protein                                    | 0        | 913499   |
| IPI00179964 | Isoform 1 of Polypyrimidine tract-binding protein 1                                 | 3086532  | 3141745  |
| IPI00180675 | Tubulin alpha-3 chain                                                               | 2052605  | 0        |
| IPI00181306 | Isoform 3 of Ubiquitin-associated protein 2-like                                    | 99643    | 0        |
| IPI00181469 | CDNA FLJ10326 fis, clone NT2RM2000577, weakly similar to ISOLEUCYL- TRNA SYNTHETASE | 224963   | 0        |
| IPI00182533 | 60S RIBOSOMAL PROTEIN                                                               | 344563   | 193433   |
| IPI00183603 | DC2 protein                                                                         | 28719    | 330810   |
| IPI00183695 | Protein S100-A10                                                                    | 527405   | 0        |
| IPI00183968 | tropomyosin 3 isoform 1                                                             | 764059   | 0        |
| IPI00184848 | Bile salt export pump                                                               | 527010   | 0        |
| IPI00185374 | 26S proteasome non-ATPase regulatory subunit 12                                     | 3336     | 96225    |
| IPI00186290 | Elongation factor 2                                                                 | 9707770  | 5296937  |
| IPI00215637 | ATP-dependent RNA helicase DDX3X                                                    | 274852   | 347668   |
| IPI00215719 | 60S ribosomal protein L18                                                           | 1431915  | 597735   |
| IPI00215777 | Isoform B of Phosphate carrier protein, mitochondrial precursor                     | 925854   | 164279   |
| IPI00215780 | 40S ribosomal protein S19                                                           | 567999   | 39289    |
| IPI00215790 | 60S ribosomal protein L38                                                           | 443299   | 725002   |

|             |                                                              |          |         |
|-------------|--------------------------------------------------------------|----------|---------|
| IPI00215884 | splicing factor, arginine/serine-rich 1 isoform 1            | 593492   | 734459  |
| IPI00215901 | adenylate kinase 2 isoform a                                 | 1371429  | 784144  |
| IPI00215911 | DNA-(apurinic or apyrimidinic site) lyase                    | 603959   | 32715   |
| IPI00215914 | ADP-ribosylation factor 1                                    | 1305378  | 14718   |
| IPI00215965 | heterogeneous nuclear ribonucleoprotein A1 isoform b         | 6125160  | 2676177 |
| IPI00215995 | Isoform Alpha-3A of Integrin alpha-3 precursor               | 199711   | 0       |
| IPI00216008 | Isoform Long of Glucose-6-phosphate 1-dehydrogenase          | 194809   | 403628  |
| IPI00216049 | Isoform 1 of Heterogeneous nuclear ribonucleoprotein K       | 6374222  | 6363087 |
| IPI00216085 | Cytochrome c oxidase subunit VIb isoform 1                   | 763124   | 0       |
| IPI00216088 | Cellular retinoic acid-binding protein 2                     | 106678   | 40756   |
| IPI00216106 | Isoform 3 of Putative GTP-binding protein 9                  | 184451   | 467654  |
| IPI00216237 | 60S ribosomal protein L36                                    | 1012341  | 223809  |
| IPI00216256 | Isoform 2 of WD repeat protein 1                             | 424188   | 908901  |
| IPI00216298 | Thioredoxin                                                  | 288738   | 47555   |
| IPI00216308 | Voltage-dependent anion-selective channel protein 1          | 5845817  | 2076261 |
| IPI00216457 | Histone H2A type 2-A                                         | 12347861 | 65978   |
| IPI00216587 | 40S ribosomal protein S8                                     | 3394421  | 542998  |
| IPI00216592 | Isoform C1 of Heterogeneous nuclear ribonucleoproteins C1/C2 | 5993812  | 2205376 |
| IPI00216659 | Isoform 2 of RNA-binding protein 8A                          | 876152   | 192673  |
| IPI00216682 | Calponin-3                                                   | 416004   | 2640126 |
| IPI00216691 | Profilin-1                                                   | 22474045 | 2315332 |
| IPI00216694 | plastin 3                                                    | 1342878  | 287590  |
| IPI00217030 | 40S ribosomal protein S4, X isoform                          | 150363   | 610221  |
| IPI00217143 | SDHA protein                                                 | 403675   | 716863  |
| IPI00217236 | Tubulin-specific chaperone A                                 | 1807601  | 653660  |
| IPI00217269 | Guanine nucleotide-binding protein G(t), alpha-2 subunit     | 575570   | 0       |
| IPI00217465 | Histone H1.2                                                 | 0        | 5236547 |

|             |                                                                                     |          |         |
|-------------|-------------------------------------------------------------------------------------|----------|---------|
| IPI00217466 | Histone H1.3                                                                        | 3941289  | 92319   |
| IPI00217468 | Histone H1.5                                                                        | 1773436  | 662018  |
| IPI00217966 | lactate dehydrogenase A                                                             | 6503200  | 996530  |
| IPI00217975 | Lamin-B1                                                                            | 533438   | 1624055 |
| IPI00218084 | similar to eukaryotic translation initiation factor 5A                              | 1355830  | 7440118 |
| IPI00218187 | Isoform Gamma-2 of Serine/threonine-protein phosphatase PP1-gamma catalytic subunit | 41234    | 2255681 |
| IPI00218236 | Serine/threonine-protein phosphatase PP1-beta catalytic subunit                     | 1501475  | 0       |
| IPI00218251 | Isoform 2 of Protein-glutamine gamma-glutamyltransferase 2                          | 17191    | 238684  |
| IPI00218342 | C-1-tetrahydrofolate synthase, cytoplasmic                                          | 426718   | 0       |
| IPI00218448 | Histone H2A.Z                                                                       | 28796    | 2357201 |
| IPI00218493 | Hypoxanthine-guanine phosphoribosyltransferase                                      | 40248    | 698231  |
| IPI00218606 | 40S ribosomal protein S23                                                           | 202542   | 0       |
| IPI00218733 | 16 kDa protein                                                                      | 3555605  | 1333846 |
| IPI00218918 | Annexin A1                                                                          | 7756877  | 3022289 |
| IPI00218993 | Isoform Beta of Heat-shock protein 105 kDa                                          | 26923    | 321666  |
| IPI00219005 | FK506-binding protein 4                                                             | 443855   | 2127427 |
| IPI00219018 | Glyceraldehyde-3-phosphate dehydrogenase                                            | 25438618 | 5471972 |
| IPI00219025 | Glutaredoxin-1                                                                      | 208293   | 35312   |
| IPI00219029 | Aspartate aminotransferase, cytoplasmic                                             | 704853   | 944633  |
| IPI00219097 | High mobility group protein B2                                                      | 741026   | 393984  |
| IPI00219153 | 60S ribosomal protein L22                                                           | 1382677  | 2343873 |
| IPI00219155 | 60S ribosomal protein L27                                                           | 1916495  | 0       |
| IPI00219156 | 60S ribosomal protein L30                                                           | 0        | 8889    |
| IPI00219160 | 60S ribosomal protein L34                                                           | 1179707  | 827621  |
| IPI00219217 | L-lactate dehydrogenase B chain                                                     | 9756786  | 7455845 |
| IPI00219219 | Galectin-1                                                                          | 15807191 | 4437902 |
| IPI00219229 | U6 snRNA-associated Sm-like protein LSm3                                            | 473841   | 0       |

|             |                                                                                                      |         |         |
|-------------|------------------------------------------------------------------------------------------------------|---------|---------|
| IPI00219330 | Isoform 5 of Interleukin enhancer-binding factor 3                                                   | 362812  | 1102076 |
| IPI00219365 | Moesin                                                                                               | 1931011 | 659700  |
| IPI00219446 | Phosphatidylethanolamine-binding protein 1                                                           | 280109  | 398393  |
| IPI00219525 | 6-phosphogluconate dehydrogenase, decarboxylating                                                    | 338592  | 1156766 |
| IPI00219575 | Bleomycin hydrolase                                                                                  | 49542   | 129289  |
| IPI00219622 | Proteasome subunit alpha type 2                                                                      | 832834  | 0       |
| IPI00219678 | Eukaryotic translation initiation factor 2 subunit 1                                                 | 812182  | 2228433 |
| IPI00219757 | Glutathione S-transferase P                                                                          | 2196531 | 1710262 |
| IPI00219840 | Isoform 1 of AP-2 complex subunit sigma-1                                                            | 303310  | 31109   |
| IPI00219871 | U6 snRNA-associated Sm-like protein LSm8                                                             | 252091  | 119389  |
| IPI00219913 | Ubiquitin carboxyl-terminal hydrolase 14                                                             | 168211  | 100755  |
| IPI00220301 | Peroxiredoxin-6                                                                                      | 2424605 | 3337723 |
| IPI00220327 | Keratin, type II cytoskeletal 1                                                                      | 2586895 | 132382  |
| IPI00220362 | 10 kDa heat shock protein, mitochondrial                                                             | 8780234 | 8769414 |
| IPI00220487 | ATP synthase, H <sup>+</sup> transporting, mitochondrial F <sub>0</sub> complex, subunit d isoform a | 872035  | 547146  |
| IPI00220503 | dynactin 2                                                                                           | 0       | 322543  |
| IPI00220637 | Seryl-tRNA synthetase, cytoplasmic                                                                   | 62890   | 298994  |
| IPI00220642 | 14-3-3 protein gamma                                                                                 | 7736    | 312493  |
| IPI00220709 | Isoform 2 of Tropomyosin beta chain                                                                  | 0       | 505459  |
| IPI00220740 | Isoform 2 of Nucleophosmin                                                                           | 9502904 | 3591381 |
| IPI00220766 | Lactoylglutathione lyase                                                                             | 322538  | 863230  |
| IPI00220834 | ATP-dependent DNA helicase 2 subunit 2                                                               | 844861  | 1920170 |
| IPI00220991 | Hypothetical protein DKFZp781K0743                                                                   | 597054  | 286991  |
| IPI00221088 | 40S ribosomal protein S9                                                                             | 1404849 | 1221671 |
| IPI00221089 | 40S ribosomal protein S13                                                                            | 2545892 | 881736  |
| IPI00221091 | 40S ribosomal protein S15a                                                                           | 14685   | 2115452 |

|             |                                                                              |         |         |
|-------------|------------------------------------------------------------------------------|---------|---------|
| IPI00221092 | 40S ribosomal protein S16                                                    | 1149397 | 1763354 |
| IPI00221093 | 40S ribosomal protein S17                                                    | 81404   | 1834302 |
| IPI00221178 | Isoform 2 of Tumor protein D54                                               | 414083  | 307161  |
| IPI00221222 | Activated RNA polymerase II transcriptional coactivator p15                  | 2898129 | 300484  |
| IPI00221224 | Aminopeptidase N                                                             | 239620  | 56457   |
| IPI00221232 | Guanine nucleotide-binding protein G(I)/G(S)/G(O) gamma-12 subunit precursor | 155235  | 991813  |
| IPI00246058 | PDCD6IP protein                                                              | 0       | 575976  |
| IPI00247583 | 60S ribosomal protein L21                                                    | 489772  | 49477   |
| IPI00288940 | ISOFORM 1 OF OBSCUR                                                          | 190037  | 0       |
| IPI00289499 | Bifunctional purine biosynthesis protein PURH                                | 182315  | 724782  |
| IPI00289758 | Calpain-2 catalytic subunit precursor                                        | 1031231 | 967552  |
| IPI00290142 | CTP synthase 1                                                               | 0       | 291382  |
| IPI00290566 | T-complex protein 1 subunit alpha                                            | 302022  | 1817377 |
| IPI00290770 | chaperonin containing TCP1, subunit 3 isoform b                              | 915169  | 0       |
| IPI00291005 | Malate dehydrogenase, cytoplasmic                                            | 2160971 | 548407  |
| IPI00291006 | Malate dehydrogenase, mitochondrial precursor                                | 8147594 | 4047769 |
| IPI00291175 | vinculin isoform VCL                                                         | 4040341 | 4538505 |
| IPI00291510 | Inosine-5'-monophosphate dehydrogenase 2                                     | 413675  | 101552  |
| IPI00291669 | Ubiquitin-like domain-containing CTD phosphatase 1                           | 217872  | 0       |
| IPI00291922 | Proteasome subunit alpha type 5                                              | 958558  | 468918  |
| IPI00291928 | Ras-related protein Rab-14                                                   | 0       | 508011  |
| IPI00293276 | Macrophage migration inhibitory factor                                       | 23897   | 1259323 |
| IPI00293350 | TRANSLIN-ASSOCIATED                                                          | 6869    | 615330  |
| IPI00293434 | Signal recognition particle 14 kDa protein                                   | 0       | 1291552 |
| IPI00293464 | DNA damage-binding protein 1                                                 | 157442  | 0       |
| IPI00293665 | Keratin, type II cytoskeletal 6B                                             | 144698  | 64540   |

|             |                                                                                  |         |         |
|-------------|----------------------------------------------------------------------------------|---------|---------|
| IPI00294380 | Phosphoenolpyruvate carboxykinase [GTP], mitochondrial precursor                 | 172155  | 0       |
| IPI00294536 | Serine-threonine kinase receptor-associated protein                              | 151259  | 131603  |
| IPI00295741 | Cathepsin B precursor                                                            | 1182466 | 1036931 |
| IPI00295851 | Coatomer subunit beta                                                            | 0       | 598326  |
| IPI00295857 | Coatomer subunit alpha                                                           | 242109  | 590007  |
| IPI00296022 | Ubiquinol-cytochrome c reductase complex 11 kDa protein, mitochondrial precursor | 1158355 | 0       |
| IPI00296053 | Isoform Mitochondrial of Fumarate hydratase, mitochondrial precursor             | 443663  | 72127   |
| IPI00296337 | Isoform 1 of DNA-dependent protein kinase catalytic subunit                      | 3308703 | 2761602 |
| IPI00296913 | ADP-sugar pyrophosphatase                                                        | 366758  | 0       |
| IPI00297084 | dolichyl-diphosphooligosaccharide-protein glycosyltransferase precursor          | 353757  | 405874  |
| IPI00297160 | CD44 antigen isoform 4 precursor                                                 | 533986  | 0       |
| IPI00297579 | Chromobox protein homolog 3                                                      | 631143  | 1090351 |
| IPI00297779 | T-complex protein 1 subunit beta                                                 | 1961753 | 1608276 |
| IPI00297982 | Eukaryotic translation initiation factor 2 subunit 3                             | 1163020 | 469878  |
| IPI00298363 | Far upstream element-binding protein 2                                           | 168718  | 2147915 |
| IPI00298406 | Isoform 2 of Hydroxyacyl-coenzyme A dehydrogenase, mitochondrial precursor       | 138158  | 60281   |
| IPI00298547 | Protein DJ-1                                                                     | 387291  | 2834597 |
| IPI00298961 | Exportin-1                                                                       | 138991  | 206032  |
| IPI00298994 | 271 kDa protein                                                                  | 877543  | 750634  |
| IPI00299000 | Proliferation-associated protein 2G4                                             | 3500028 | 2346641 |
| IPI00299155 | Proteasome subunit alpha type 4                                                  | 819171  | 947363  |
| IPI00299571 | Isoform 2 of Protein disulfide-isomerase A6 precursor                            | 4943453 | 227800  |
| IPI00299573 | 60S ribosomal protein L7a                                                        | 1059232 | 2819288 |

|             |                                                                                          |          |          |
|-------------|------------------------------------------------------------------------------------------|----------|----------|
| IPI00299608 | Isoform 1 of 26S proteasome non-ATPase regulatory subunit 1                              | 198689   | 498991   |
| IPI00300074 | Phenylalanyl-tRNA synthetase beta chain                                                  | 214296   | 0        |
| IPI00300371 | Splicing factor 3B subunit 3                                                             | 164901   | 310874   |
| IPI00301263 | CAD protein                                                                              | 105344   | 140789   |
| IPI00301311 | Isoform 2 of Protein SET                                                                 | 752331   | 1614822  |
| IPI00301936 | ELAV-like protein 1                                                                      | 671535   | 67803    |
| IPI00302592 | filamin A, alpha                                                                         | 24220058 | 14008605 |
| IPI00302850 | Small nuclear ribonucleoprotein Sm D1                                                    | 0        | 949955   |
| IPI00302925 | Chaperonin containing TCP1, subunit 8 (Theta) variant                                    | 1107603  | 3430947  |
| IPI00302927 | T-complex protein 1 subunit delta                                                        | 2068133  | 2174257  |
| IPI00303207 | ATP-binding cassette sub-family E member 1                                               | 495051   | 178678   |
| IPI00303476 | ATP synthase subunit beta, mitochondrial precursor                                       | 7529590  | 4372529  |
| IPI00303882 | Isoform B of Mannose-6-phosphate receptor-binding protein 1                              | 4098295  | 1268078  |
| IPI00304409 | Calcium-regulated heat stable protein 1                                                  | 313377   | 0        |
| IPI00304596 | Non-POU domain-containing octamer-binding protein                                        | 227139   | 1202308  |
| IPI00304925 | Heat shock 70 kDa protein 1                                                              | 7325892  | 2664885  |
| IPI00305383 | Ubiquinol-cytochrome-c reductase complex core protein 2, mitochondrial precursor         | 577908   | 49170    |
| IPI00305692 | Thioredoxin-like protein 1                                                               | 177392   | 0        |
| IPI00306301 | Pyruvate dehydrogenase E1 component alpha subunit, somatic form, mitochondrial precursor | 181682   | 0        |
| IPI00306332 | 60S ribosomal protein L24                                                                | 600144   | 0        |
| IPI00306369 | NOL1/NOP2/Sun domain family 2 protein                                                    | 75520    | 284465   |
| IPI00306516 | Import inner membrane translocase subunit TIM44, mitochondrial precursor                 | 240251   | 185333   |



|             |                                                                                       |          |          |
|-------------|---------------------------------------------------------------------------------------|----------|----------|
| IPI00306825 | Isoform 1 of Tumor protein D54                                                        | 732565   | 2152535  |
| IPI00306960 | Asparaginyl-tRNA synthetase, cytoplasmic                                              | 1400583  | 358148   |
| IPI00328154 | NEDD8-activating enzyme E1 catalytic subunit                                          | 168909   | 0        |
| IPI00328293 | Serine/arginine repetitive matrix 1                                                   | 142574   | 0        |
| IPI00328319 | Histone-binding protein RBBP4                                                         | 1139582  | 369540   |
| IPI00328350 | Niban protein                                                                         | 107166   | 174009   |
| IPI00328840 | THO complex subunit 4                                                                 | 363303   | 0        |
| IPI00329389 | 60S ribosomal protein L6                                                              | 429289   | 998776   |
| IPI00329633 | Threonyl-tRNA synthetase, cytoplasmic                                                 | 883840   | 898555   |
| IPI00329745 | CDNA FLJ43793 fis, clone TESTI4000014, highly similar to 130 kDa leucine-rich protein | 605037   | 260553   |
| IPI00329801 | Annexin A5                                                                            | 3824180  | 4333522  |
| IPI00333215 | Isoform 1 of Transcription elongation factor A protein 1                              | 230726   | 486611   |
| IPI00334159 | Von Hippel-Lindau binding protein 1                                                   | 187214   | 0        |
| IPI00334190 | Stomatin-like protein 2                                                               | 96599    | 0        |
| IPI00334276 | CDNA FLJ25727 fis, clone TST05479                                                     | 197374   | 30022    |
| IPI00334587 | Isoform 2 of Heterogeneous nuclear ribonucleoprotein A/B                              | 2309924  | 468647   |
| IPI00334775 | 85 kDa protein                                                                        | 21243878 | 10978131 |
| IPI00335061 | Pyrroline-5-carboxylate reductase family, member 2                                    | 73265    | 87752    |
| IPI00335132 | 22 kDa protein                                                                        | 1071331  | 2618633  |
| IPI00335168 | myosin, light chain 6, alkali, smooth muscle and non-muscle isoform 1                 | 1668041  | 35927    |
| IPI00337736 | Isoform 2 of Kinectin                                                                 | 817352   | 34400    |
| IPI00375441 | Isoform 1 of Far upstream element-binding protein 1                                   | 163475   | 594823   |
| IPI00375631 | Interferon-induced 17 kDa protein precursor                                           | 158510   | 0        |
| IPI00375704 | Hypothetical protein DKFZp686I0180 (Fragment)                                         | 127897   | 288965   |

|             |                                                                                         |          |          |
|-------------|-----------------------------------------------------------------------------------------|----------|----------|
| IPI00376005 | Isoform 2 of Eukaryotic translation initiation factor 5A-1                              | 3083209  | 2747203  |
| IPI00376798 | ribosomal protein L11                                                                   | 879949   | 4480419  |
| IPI00382470 | Heat shock protein HSP 90-alpha 2                                                       | 6221915  | 68132    |
| IPI00382869 | Farnesyl pyrophosphate synthetase like-4 protein (Fragment)                             | 360257   | 0        |
| IPI00383531 | PRKCDBP protein (Fragment)                                                              | 339251   | 0        |
| IPI00383539 | citrate synthase precursor, isoform b                                                   | 313518   | 0        |
| IPI00383751 | CALRETICULIN=CALCIUM binding protein (Fragment)                                         | 753953   | 1229705  |
| IPI00384016 | Full-length cDNA 5-PRIME end of clone CS0DJ009YL13 of T cells (Jurkat cell line) of Hom | 325161   | 537138   |
| IPI00384051 | Proteasome activator complex subunit 2                                                  | 355146   | 293952   |
| IPI00385153 | HUMEEP                                                                                  | 0        | 49021    |
| IPI00386119 | Isoform 5 of Splicing factor 1                                                          | 60439    | 0        |
| IPI00386755 | ERO1-like protein alpha precursor                                                       | 51841    | 130223   |
| IPI00387144 | Tubulin alpha-ubiquitous chain                                                          | 22049433 | 5526458  |
| IPI00395627 | Isoform 1 of Calcyclin-binding protein                                                  | 2690001  | 554729   |
| IPI00395769 | Isoform Heart of ATP synthase gamma chain, mitochondrial precursor                      | 654959   | 72679    |
| IPI00396321 | Leucine-rich repeat-containing protein 59                                               | 214533   | 0        |
| IPI00396370 | Isoform 1 of Eukaryotic translation initiation factor 3 subunit 9                       | 720124   | 358747   |
| IPI00396378 | Isoform B1 of Heterogeneous nuclear ribonucleoproteins A2/B1                            | 13324715 | 8869804  |
| IPI00396435 | DEAH (Asp-Glu-Ala-His) box polypeptide 15                                               | 915518   | 453949   |
| IPI00396485 | Elongation factor 1-alpha 1                                                             | 27612503 | 12895496 |
| IPI00397191 | similar to peptidylprolyl isomerase A isoform 1                                         | 4223584  | 0        |
| IPI00398135 | similar to 60S ribosomal protein L27a                                                   | 2445159  | 1424135  |
| IPI00398983 | OTTHUMP00000018470                                                                      | 60752    | 652375   |

|             |                                                                                           |          |          |
|-------------|-------------------------------------------------------------------------------------------|----------|----------|
| IPI00398985 | similar to Fatty acid-binding protein, epidermal                                          | 563429   | 14345    |
| IPI00410693 | Isoform 1 of Plasminogen activator inhibitor 1 RNA-binding protein                        | 955810   | 40107    |
| IPI00411301 | OTTHUMP00000030903                                                                        | 30695    | 337695   |
| IPI00411633 | Heat shock protein beta                                                                   | 601228   | 152628   |
| IPI00411984 | Serine/threonine-protein kinase 3                                                         | 64976    | 0        |
| IPI00412545 | Hypothetical protein DKFZp781K1356                                                        | 297626   | 0        |
| IPI00412579 | 60S ribosomal protein L10a                                                                | 1315736  | 82489    |
| IPI00413108 | Ribosomal protein SA                                                                      | 3905217  | 1055645  |
| IPI00413451 | Hypothetical protein DKFZp686I04222                                                       | 284869   | 0        |
| IPI00413778 | FKBP1A protein                                                                            | 201782   | 326325   |
| IPI00414320 | Annexin A11                                                                               | 137907   | 0        |
| IPI00414860 | 60S RIBOSOMAL PROTEIN                                                                     | 194254   | 147799   |
| IPI00418169 | annexin A2 isoform 1                                                                      | 7828326  | 6047444  |
| IPI00418471 | Vimentin                                                                                  | 46329616 | 44945906 |
| IPI00419373 | Isoform 1 of Heterogeneous nuclear ribonucleoprotein A3                                   | 494370   | 2219357  |
| IPI00419585 | Peptidyl-prolyl cis-trans isomerase A                                                     | 12881319 | 4884650  |
| IPI00419880 | 40S ribosomal protein S3a                                                                 | 1293396  | 1456985  |
| IPI00420014 | U5 small nuclear ribonucleoprotein 200 kDa helicase                                       | 8627     | 406608   |
| IPI00420096 | plectin 1 isoform 3                                                                       | 1283748  | 867043   |
| IPI00420108 | Dihydrolipoyllysine-residue succinyltransferase component of 2-oxoglutarate dehydrogenase | 0        | 281581   |
| IPI00429191 | Eukaryotic peptide chain release factor subunit 1                                         | 142085   | 0        |
| IPI00430812 | Zinc finger protein 9                                                                     | 841424   | 0        |
| IPI00438229 | tripartite motif-containing 28 protein                                                    | 123714   | 1232957  |
| IPI00440493 | ATP synthase subunit alpha, mitochondrial precursor                                       | 3849671  | 3310467  |
| IPI00442278 | CDNA FLJ16223 fis, clone CTONG3003598                                                     | 4834785  | 201028   |

|             |                                                                                         |          |          |
|-------------|-----------------------------------------------------------------------------------------|----------|----------|
| IPI00443909 | Isoform 1 of MIR-interacting saposin-like protein precursor                             | 572164   | 487516   |
| IPI00444262 | CDNA FLJ45706 fis, clone FEBRA2028457, highly similar to Nucleolin                      | 5124525  | 7075401  |
| IPI00449049 | Poly [ADP-ribose] polymerase 1                                                          | 250185   | 1200432  |
| IPI00453473 | Histone H4                                                                              | 21709472 | 191746   |
| IPI00453476 | similar to Phosphoglycerate mutase 1 (Phosphoglycerate mutase isozyme B) (PGAM-B) (BPG- | 2106965  | 1237785  |
| IPI00455457 | Novel protein similar to histone 2, H3c                                                 | 287734   | 0        |
| IPI00456887 | Scaffold attachment factor A2                                                           | 231250   | 0        |
| IPI00456898 | similar to ribosomal protein S12                                                        | 1110030  | 0        |
| IPI00456969 | Dynein heavy chain, cytosolic                                                           | 0        | 176754   |
| IPI00465028 | Triosephosphate isomerase 1 variant                                                     | 10998929 | 8923010  |
| IPI00465044 | PROTEIN RCC2                                                                            | 159110   | 111353   |
| IPI00465070 | Histone H3.1                                                                            | 0        | 615469   |
| IPI00465102 | DNA polymerase epsilon, catalytic subunit A                                             | 4389903  | 4998031  |
| IPI00465121 | Galphai2 protein                                                                        | 275278   | 1258316  |
| IPI00465248 | enolase 1                                                                               | 25934010 | 11103192 |
| IPI00465260 | GARS protein                                                                            | 1710136  | 357532   |
| IPI00465315 | Cytochrome c                                                                            | 463206   | 466086   |
| IPI00465361 | 60S ribosomal protein L13                                                               | 1433899  | 414737   |
| IPI00465430 | 70 kDa protein                                                                          | 5619429  | 3179643  |
| IPI00465431 | Galectin-3                                                                              | 709185   | 0        |
| IPI00465439 | Fructose-bisphosphate aldolase A                                                        | 1363056  | 6452856  |
| IPI00470525 | Glycogen phosphorylase, liver form                                                      | 608028   | 176090   |
| IPI00470528 | 60S ribosomal protein L15                                                               | 527799   | 78910    |
| IPI00472102 | 61 kDa protein                                                                          | 12682678 | 6889228  |
| IPI00472943 | HLA class I histocompatibility antigen, B-73 alpha chain precursor                      | 1216349  | 40756    |
| IPI00473014 | Destrin                                                                                 | 198826   | 323263   |
| IPI00478292 | Isoform 1 of Spectrin alpha chain, brain                                                | 259944   | 0        |
| IPI00479186 | pyruvate kinase 3 isoform 1                                                             | 22549878 | 6363153  |

|             |                                                              |          |          |
|-------------|--------------------------------------------------------------|----------|----------|
| IPI00479217 | heterogeneous nuclear ribonucleoprotein U isoform b          | 7527803  | 1110927  |
| IPI00479366 | 31 kDa protein                                               | 2128430  | 22487    |
| IPI00479786 | KH-type splicing regulatory protein                          | 1132627  | 45956    |
| IPI00479997 | Stathmin                                                     | 0        | 795915   |
| IPI00514053 | Coatomer subunit delta                                       | 34908    | 181155   |
| IPI00549343 | Vesicle-associated membrane protein 3                        | 353837   | 54717    |
| IPI00549672 | HSPC027                                                      | 459759   | 368384   |
| IPI00550021 | 60S ribosomal protein L3                                     | 1867103  | 1822889  |
| IPI00550069 | Ribonuclease inhibitor                                       | 714099   | 873617   |
| IPI00550363 | Transgelin-2                                                 | 3232028  | 935688   |
| IPI00550364 | Phosphoglucomutase-2                                         | 72352    | 16740    |
| IPI00550689 | UPF0027 protein C22orf28                                     | 38789    | 50391    |
| IPI00550917 | Twinfilin-2                                                  | 470328   | 0        |
| IPI00552036 | ATP synthase F0 subunit 6                                    | 176442   | 0        |
| IPI00552715 | chaperonin containing TCP1, subunit 3 isoform c              | 41636    | 3192684  |
| IPI00553169 | Filamin A, alpha                                             | 192148   | 12455    |
| IPI00554648 | Keratin, type II cytoskeletal 8                              | 4574570  | 4460821  |
| IPI00554681 | NADH dehydrogenase [ubiquinone] 1 alpha subcomplex subunit 5 | 0        | 620220   |
| IPI00554788 | 49 kDa protein                                               | 3203100  | 5966094  |
| IPI00554811 | Actin-related protein 2/3 complex subunit 4                  | 762507   | 59089    |
| IPI00555610 | 313 kDa protein                                              | 3200443  | 4105644  |
| IPI00555902 | OCIA domain containing 2 isoform 1                           | 182376   | 0        |
| IPI00555956 | Proteasome subunit beta type 4 precursor                     | 301136   | 831055   |
| IPI00604590 | NME1-NME2 protein                                            | 12158237 | 11815389 |
| IPI00640372 | Copine I                                                     | 0        | 185755   |
| IPI00641582 | BAG family molecular chaperone regulator 3                   | 109116   | 251527   |
| IPI00641829 | BAT1 protein                                                 | 2844775  | 1026054  |
| IPI00641950 | Lung cancer oncogene 7 similar to ribosomal                  | 3347081  | 93222    |
| IPI00642513 | protein S18                                                  | 790133   | 91354    |
| IPI00642542 | DJ639P13.2.2                                                 | 458452   | 18271    |
| IPI00642816 | Signal recognition particle 9 kDa protein                    | 2108094  | 71097    |
| IPI00642982 | Hypothetical protein                                         | 26097    | 657684   |
| IPI00643041 | GTP-binding nuclear protein Ran                              | 6632443  | 3855520  |
| IPI00643368 | Ras homolog gene family, member C                            | 501202   | 1155531  |
| IPI00643920 | Transketolase                                                | 3265217  | 2860834  |

|             |                                                                                        |         |         |
|-------------|----------------------------------------------------------------------------------------|---------|---------|
| IPI00644127 | Isoleucyl-tRNA synthetase, cytoplasmic                                                 | 217281  | 0       |
| IPI00645078 | Ubiquitin-activating enzyme E1                                                         | 1279037 | 0       |
| IPI00645194 | integrin beta 1 isoform 1A precursor                                                   | 40430   | 512409  |
| IPI00646240 | HIST2H3PS2 protein                                                                     | 795359  | 1071439 |
| IPI00646304 | peptidylprolyl isomerase B precursor                                                   | 2073716 | 2547820 |
| IPI00646425 | similar to Valyl-tRNA synthetase (Valine--tRNA ligase) (ValRS) (Protein G7a) isoform 1 | 230651  | 22251   |
| IPI00646689 | Thioredoxin-like protein 5                                                             | 499793  | 0       |
| IPI00646779 | TUBB6 protein                                                                          | 36271   | 904649  |
| IPI00647418 | NPD011                                                                                 | 0       | 340312  |
| IPI00647421 | 16 kDa protein                                                                         | 76931   | 0       |
| IPI00654777 | Eukaryotic translation initiation factor 3 subunit 5                                   | 0       | 1007009 |
| IPI00719622 | 40S ribosomal protein S28                                                              | 8059    | 3150600 |
| IPI00719633 | RELA protein                                                                           | 631514  | 751513  |
| IPI00742805 | 15 kDa protein                                                                         | 505843  | 51223   |
| IPI00742905 | ATP-dependent RNA helicase A                                                           | 544537  | 558076  |
| IPI00744618 | Stathmin 1 variant (Fragment)                                                          | 6037167 | 47556   |
| IPI00745851 | 21 kDa protein                                                                         | 115376  | 3721347 |
| IPI00746388 | Ezrin                                                                                  | 19883   | 2126759 |
| IPI00746655 | Isoform 2 of Protein FAM62A                                                            | 146334  | 0       |
| IPI00746777 | Class III alCohol dehydrogenase 5 Chi subunit                                          | 0       | 519671  |
| IPI00747849 | Isoform 1 of Sodium/potassium-transporting ATPase subunit beta-1                       | 58933   | 0       |
| IPI00759493 | succinate-CoA ligase, GDP-forming, alpha subunit                                       | 351402  | 227394  |
| IPI00759644 | FK506 binding protein12                                                                | 0       | 600635  |
| IPI00759723 | Isoform Monomeric of Arginyl-tRNA synthetase, cytoplasmic                              | 322053  | 16197   |
| IPI00784347 | Keratin, type I cytoskeletal 18                                                        | 2281925 | 2071892 |
| IPI00789627 | 44 kDa protein                                                                         | 388453  | 1006216 |
| IPI00789847 | Protein                                                                                | 729212  | 9327438 |
| IPI00790498 | Protein                                                                                | 444283  | 0       |
| IPI00792538 | Protein                                                                                | 0       | 788469  |

|             |                |         |         |
|-------------|----------------|---------|---------|
| IPI00793205 | 14 kDa protein | 68890   | 257713  |
| IPI00793696 | 19 kDa protein | 16380   | 875958  |
| IPI00794605 | 18 kDa protein | 437261  | 453088  |
| IPI00794894 | Protein        | 1014079 | 1163115 |
| IPI00797321 | 21 kDa protein | 194086  | 49141   |

| Id          | Name of protein                                 | C2        | H2        |
|-------------|-------------------------------------------------|-----------|-----------|
|             |                                                 | abundance | abundance |
| IPI00000051 | Prefoldin subunit 1                             | 152552    | 295868    |
| IPI00000105 | Major vault protein                             | 816251    | 918216    |
| IPI00000477 | PNAS-139                                        | 175864    | 239696    |
| IPI00000494 | 60S ribosomal protein L5                        | 257206    | 548098    |
| IPI00000495 | PNAS-125                                        | 127568    | 201575    |
| IPI00000643 | BAG FAMILY MOLECULAR                            | 103279    | 238242    |
| IPI00000684 | Isoform AGX2 of UDP-N-acetylhexosamine          | 64368     | 169925    |
| IPI00000816 | 14-3-3 protein epsilon                          | 964876    | 1145997   |
| IPI00000846 | Isoform 1 of Chromodomain helicase-             | 23661     | 29611     |
| IPI00000856 | Isoform 1 of Pleckstrin homology domain-        | 13986     | 121308    |
| IPI00000861 | Isoform 1 of LIM and SH3                        | 469164    | 18762     |
| IPI00000874 | Peroxiredoxin-1                                 | 12834388  | 4176139   |
| IPI00000875 | Elongation factor 1-gamma                       | 3944781   | 3017865   |
| IPI00001453 | Alpha-internexin                                | 11221     | 299670    |
| IPI00001589 | Mitochondrial import inner membrane translocase | 436957    | 115266    |
| IPI00001639 | Importin beta-1 subunit                         | 2525573   | 3835989   |
| IPI00001734 | Isoform 1 of                                    | 1126440   | 321133    |
| IPI00001960 | Chloride intracellular                          | 428963    | 860123    |
| IPI00002459 | annexin VI isoform 2                            | 84794     | 199492    |
| IPI00002520 | Serine                                          | 719214    | 614146    |
| IPI00002521 | ATP synthase coupling                           | 436850    | 428348    |
| IPI00002821 | 60S ribosomal protein L14                       | 350359    | 0         |
| IPI00002966 | Heat shock 70 kDa protein                       | 4182245   | 7227807   |
| IPI00003269 | hypothetical protein                            | 13334167  | 15364371  |
| IPI00003362 | HSPA5 protein                                   | 15630667  | 19231827  |
| IPI00003377 | Isoform 1 of Splicing factor,                   | 1754730   | 2142827   |
| IPI00003815 | Rho GDP-dissociation                            | 206904    | 331123    |
| IPI00003833 | Mitochondrial carrier                           | 86804     | 129062    |
| IPI00003865 | Isoform 1 of Heat shock                         | 26704150  | 30348931  |
| IPI00003881 | heterogeneous nuclear                           | 244813    | 270930    |
| IPI00003918 | 60S ribosomal protein L4                        | 2898738   | 3248321   |
| IPI00003925 | Isoform 1 of Pyruvate dehydrogenase E1          | 287979    | 218807    |
| IPI00003935 | Histone H2B type 2-E                            | 3998261   | 21848     |
| IPI00003949 | Ubiquitin-conjugating                           | 1266647   | 1671802   |
| IPI00004092 | Isoform SERCA3B of Sarcoplasmic/endoplasmic     | 272669    | 397034    |
| IPI00004358 | Glycogen phosphorylase,                         | 513379    | 826565    |
| IPI00004656 | Beta-2-microglobulin                            | 898482    | 335873    |
| IPI00004839 | Crk-like protein                                | 117992    | 130783    |
| IPI00004902 | electron-transfer-                              | 213630    | 340313    |
| IPI00005031 | Isoform 7 of Protocadherin-                     | 380347    | 641775    |
| IPI00005154 | FACT complex subunit                            | 151572    | 135343    |
| IPI00005158 | Lon protease homolog,                           | 354051    | 295918    |
| IPI00005159 | Actin-like protein 2                            | 548866    | 1227682   |
| IPI00005161 | Actin-related protein 2/3                       | 175864    | 239696    |
| IPI00005198 | Interleukin enhancer-                           | 2194353   | 2432340   |
| IPI00005202 | Membrane-associated progesterone receptor       | 24483     | 144834    |
| IPI00005537 | 39S ribosomal protein L12,                      | 1072382   | 1404437   |



|             |                                                      |          |         |
|-------------|------------------------------------------------------|----------|---------|
| IPI00005613 | Splicing factor U2AF 35                              | 235484   | 110828  |
| IPI00005614 | Isoform Long of Spectrin                             | 32047    | 184573  |
| IPI00005648 | Scaffold attachment factor                           | 231690   | 287061  |
| IPI00005657 | Prefoldin subunit 6                                  | 38630    | 656014  |
| IPI00005705 | Isoform Gamma-1 of Serine/threonine-protein          | 848977   | 1433369 |
| IPI00005719 | RAB1A, member RAS                                    | 186557   | 1863723 |
| IPI00005969 | F-actin capping protein                              | 1611572  | 1003132 |
| IPI00006052 | Prefoldin subunit 2                                  | 664026   | 248819  |
| IPI00006181 | Eukaryotic translation                               | 348639   | 165664  |
| IPI00006211 | VAMP-associated protein                              | 339756   | 368195  |
| IPI00006252 | Multisynthetase complex                              | 288738   | 306818  |
| IPI00006362 | Isoform 2 of Endothelial                             | 286888   | 256617  |
| IPI00006482 | Isoform Long of Sodium/potassium-                    | 371487   | 527854  |
| IPI00006684 | Isoform 4 of Apoptosis                               | 154416   | 111691  |
| IPI00006723 | WD repeat protein 57                                 | 240818   | 241281  |
| IPI00006980 | Protein C14orf166                                    | 49542    | 568337  |
| IPI00007052 | Mitochondrial fission 1                              | 115498   | 94748   |
| IPI00007074 | Tyrosyl-tRNA synthetase,                             | 677705   | 375137  |
| IPI00007175 | Isoform 1 of 60S ribosome subunit biogenesis protein | 128452   | 125143  |
| IPI00007188 | ADP/ATP translocase 2                                | 6066679  | 3039929 |
| IPI00007402 | 120 kDa protein                                      | 416324   | 478206  |
| IPI00007423 | Isoform 1 of Acidic leucine-rich nuclear             | 1799088  | 3463875 |
| IPI00007752 | Tubulin beta-2C chain                                | 1473778  | 2877561 |
| IPI00007755 | Ras-related protein Rab-21                           | 44151    | 120206  |
| IPI00007764 | hematological and                                    | 213142   | 394685  |
| IPI00007765 | Stress-70 protein,                                   | 11082543 | 7774134 |
| IPI00007928 | Pre-mRNA-processing-                                 | 155164   | 210615  |
| IPI00007935 | PDZ and LIM domain                                   | 721016   | 1078054 |
| IPI00008240 | Methionyl-tRNA                                       | 1034877  | 1157169 |
| IPI00008274 | Adenylyl cyclase-                                    | 1665432  | 4349587 |
| IPI00008380 | Serine/threonine-protein phosphatase 2A catalytic    | 327534   | 570500  |
| IPI00008418 | Isoform 1 of Diablo                                  | 245467   | 299189  |
| IPI00008433 | 40S ribosomal protein S5                             | 669465   | 940813  |
| IPI00008438 | 40S ribosomal protein S10                            | 484500   | 820022  |
| IPI00008494 | Intercellular adhesion                               | 1363297  | 886428  |
| IPI00008524 | Isoform 1 of Polyadenylate-                          | 1539851  | 2921430 |
| IPI00008527 | 60S acidic ribosomal                                 | 4496213  | 1734948 |
| IPI00008529 | 60S acidic ribosomal                                 | 5873147  | 7231855 |
| IPI00008530 | 60S acidic ribosomal                                 | 5218122  | 5232923 |
| IPI00008557 | insulin-like growth factor 2                         | 543028   | 807314  |
| IPI00008575 | Isoform 1 of KH domain-containing, RNA-binding,      | 883985   | 493359  |
| IPI00008868 | Microtubule-associated                               | 130297   | 163319  |
| IPI00008918 | Isoform Beta of LIM                                  | 54313    | 182895  |
| IPI00008982 | Isoform Long of Delta 1-pyrroline-5-carboxylate      | 58177    | 157810  |
| IPI00008998 | HSPC121                                              | 156160   | 110250  |
| IPI00009030 | Isoform LAMP-2A of Lysosome-associated               | 927169   | 535283  |
| IPI00009032 | Lupus La protein                                     | 1087636  | 1922839 |
| IPI00009071 | Isoform 3 of FUS-                                    | 135800   | 190854  |

|             |                                                     |          |          |
|-------------|-----------------------------------------------------|----------|----------|
| IPI00009104 | RuvB-like 2                                         | 402071   | 845370   |
| IPI00009236 | caveolin 1                                          | 184732   | 108406   |
| IPI00009305 | Glucosamine-6-phosphate                             | 498861   | 604229   |
| IPI00009342 | Ras GTPase-activating-like                          | 3581014  | 1927475  |
| IPI00009507 | Isoform 1 of Synaptophysin                          | 24514    | 272631   |
| IPI00009634 | Sulfide:quinone                                     | 637998   | 450270   |
| IPI00009771 | Lamin B2                                            | 215234   | 296331   |
| IPI00009790 | 6-phosphofructokinase                               | 1694620  | 2070163  |
| IPI00009904 | Protein disulfide-isomerase                         | 1421770  | 2035783  |
| IPI00009960 | Isoform 1 of Mitochondrial                          | 518404   | 519068   |
| IPI00010105 | Eukaryotic translation                              | 834574   | 2159675  |
| IPI00010153 | 60S ribosomal protein L23                           | 650103   | 900294   |
| IPI00010157 | S-adenosylmethionine                                | 715688   | 197528   |
| IPI00010182 | diazepam binding inhibitor                          | 1359543  | 2023807  |
| IPI00010201 | PROTEASOME 26S NON-                                 | 225164   | 57452    |
| IPI00010271 | Isoform A of Ras-related<br>C3 botulinum toxin      | 132205   | 281512   |
| IPI00010402 | Hypothetical protein                                | 742077   | 1008323  |
| IPI00010415 | Isoform 1 of Cytosolic acyl<br>coenzyme A thioester | 533051   | 30678    |
| IPI00010706 | Glutathione synthetase                              | 50154    | 323673   |
| IPI00010720 | T-complex protein 1                                 | 1289047  | 591707   |
| IPI00010740 | Isoform Long of Splicing                            | 1414503  | 1303758  |
| IPI00010796 | Protein disulfide-isomerase                         | 2049327  | 2630097  |
| IPI00010810 | Electron transfer<br>flavoprotein subunit alpha,    | 1149227  | 509326   |
| IPI00010865 | Casein kinase II subunit                            | 60814    | 117322   |
| IPI00010896 | Chloride intracellular                              | 5631761  | 7893388  |
| IPI00011126 | 26S protease regulatory                             | 498746   | 462701   |
| IPI00011253 | 40S ribosomal protein S3                            | 4488469  | 2915444  |
| IPI00011268 | RNA binding protein                                 | 255038   | 280962   |
| IPI00011274 | heterogeneous nuclear                               | 408127   | 1978098  |
| IPI00011284 | Isoform Membrane-bound<br>of Catechol O-            | 200964   | 61351    |
| IPI00011454 | Isoform 2 of Neutral alpha-                         | 465820   | 205765   |
| IPI00011603 | 26S proteasome non-                                 | 97235    | 68345    |
| IPI00011654 | Tubulin beta chain                                  | 17801861 | 11660747 |
| IPI00012007 | Adenosylhomocysteinase                              | 334530   | 525444   |
| IPI00012011 | Cofilin-1                                           | 7123761  | 5638677  |
| IPI00012066 | poly(rC)-binding protein 2                          | 2587586  | 3229148  |
| IPI00012074 | Heterogeneous nuclear                               | 1471301  | 1155646  |
| IPI00012340 | Splicing factor,                                    | 20149    | 640202   |
| IPI00012345 | Isoform SRP55-1 of                                  | 579577   | 74674    |
| IPI00012442 | Ras GTPase-activating                               | 0        | 244102   |
| IPI00012493 | 40S RIBOSOMAL PROTEIN                               | 636290   | 881129   |
| IPI00012503 | Isoform Sap-mu-0 of                                 | 1126599  | 947812   |
| IPI00012535 | DNAJ HOMOLOG SUBFAM                                 | 28525    | 383918   |
| IPI00012750 | 40S ribosomal protein S25                           | 705267   | 823736   |
| IPI00012772 | 60S ribosomal protein L8                            | 250266   | 0        |
| IPI00012795 | Eukaryotic translation                              | 233675   | 0        |
| IPI00013415 | 40S ribosomal protein S7                            | 2297729  | 4601345  |
| IPI00013452 | glutamyl-prolyl tRNA                                | 871928   | 492791   |
| IPI00013508 | Alpha-actinin-1                                     | 9034643  | 10185204 |
| IPI00013676 | Phosphotyrosine<br>independent ligand p62B          | 57860    | 290109   |

|             |                                                      |         |          |
|-------------|------------------------------------------------------|---------|----------|
| IPI00013679 | Isoform DUT-M of Deoxyuridine 5'-                    | 37911   | 622642   |
| IPI00013808 | Alpha-actinin-4                                      | 1428552 | 2833033  |
| IPI00013877 | Isoform 1 of                                         | 623737  | 669304   |
| IPI00013881 | heterogeneous nuclear                                | 1671909 | 2153743  |
| IPI00013891 | Isoform Long of                                      | 158320  | 294495   |
| IPI00013894 | Stress-induced-                                      | 620504  | 1934925  |
| IPI00013895 | Protein S100-A11                                     | 314604  | 201828   |
| IPI00013949 | Small glutamine-rich tetratricopeptide repeat-       | 27301   | 193880   |
| IPI00013991 | Isoform 1 of Tropomyosin                             | 1235534 | 5597818  |
| IPI00014151 | 26S proteasome non-                                  | 97446   | 224441   |
| IPI00014177 | Septin-2                                             | 864643  | 803142   |
| IPI00014230 | Complement component 1 Q subcomponent-binding        | 1156868 | 2651952  |
| IPI00014238 | Lysyl-tRNA synthetase                                | 485370  | 430723   |
| IPI00014537 | Isoform 1 of Calumenin                               | 595793  | 452764   |
| IPI00014587 | Isoform Brain of Clathrin                            | 396100  | 0        |
| IPI00014850 | Astrocytic phosphoprotein                            | 172243  | 264039   |
| IPI00014938 | Nuclear protein Hcc-1                                | 12264   | 250171   |
| IPI00015018 | Inorganic pyrophosphatase                            | 287501  | 376432   |
| IPI00015029 | Prostaglandin E synthase 3                           | 2967247 | 1878162  |
| IPI00015077 | Eukaryotic translation                               | 119698  | 1599933  |
| IPI00015148 | Ras-related protein Rap-1b                           | 405756  | 1028857  |
| IPI00015262 | Calponin-2                                           | 805838  | 569129   |
| IPI00015361 | Prefoldin subunit 5                                  | 660349  | 836572   |
| IPI00015671 | tubulin, alpha-like 3                                | 682151  | 965558   |
| IPI00015838 | Cell growth-regulating                               | 10601   | 153468   |
| IPI00015842 | Reticulocalbin-1 precursor                           | 765113  | 626382   |
| IPI00015891 | Prefoldin subunit 4                                  | 15486   | 224921   |
| IPI00015911 | Dihydrolipoyl                                        | 814626  | 1072974  |
| IPI00015953 | Isoform 1 of Nucleolar RNA                           | 955075  | 671675   |
| IPI00016342 | Ras-related protein Rab-7                            | 377021  | 1320527  |
| IPI00016610 | Poly(rC)-binding protein 1                           | 2803166 | 3237353  |
| IPI00016613 | CSNK2A1 PROTEIN.                                     | 101008  | 17397    |
| IPI00016801 | Glutamate dehydrogenase                              | 798518  | 757603   |
| IPI00016910 | Eukaryotic translation                               | 344277  | 281405   |
| IPI00017297 | Matrin-3                                             | 1853828 | 2813777  |
| IPI00017334 | Prohibitin                                           | 3111023 | 1938680  |
| IPI00017373 | Replication protein A 14                             | 268919  | 474832   |
| IPI00017448 | 40S ribosomal protein S21                            | 1064104 | 21804    |
| IPI00017469 | Sepiapterin reductase                                | 128537  | 198641   |
| IPI00017510 | Cytochrome c oxidase                                 | 130618  | 0        |
| IPI00017596 | Microtubule-associated                               | 687345  | 824471   |
| IPI00017617 | Probable ATP-dependent                               | 1322328 | 992654   |
| IPI00017672 | CDNA FLJ25678 fis, clone TST04067, highly similar to | 1847921 | 2362476  |
| IPI00017704 | Coactosin-like protein                               | 300619  | 916902   |
| IPI00017726 | hydroxysteroid (17-beta)                             | 203561  | 72357    |
| IPI00017855 | Aconitate hydratase,                                 | 393993  | 419987   |
| IPI00017964 | Small nuclear                                        | 728024  | 169070   |
| IPI00018140 | Isoform 1 of                                         | 316207  | 718184   |
| IPI00018146 | 14-3-3 protein theta                                 | 9066405 | 15620026 |
| IPI00018206 | Aspartate                                            | 2116326 | 4603476  |
| IPI00018246 | Isoform 1 of Hexokinase-1                            | 59390   | 74687    |

|             |                                                          |          |          |
|-------------|----------------------------------------------------------|----------|----------|
| IPI00018352 | Ubiquitin carboxyl-terminal                              | 538260   | 481562   |
| IPI00018398 | 26S protease regulatory                                  | 49135    | 245995   |
| IPI00018452 | COPINE I                                                 | 129282   | 131099   |
| IPI00018465 | T-complex protein 1                                      | 1378420  | 1582797  |
| IPI00018522 | Isoform 1 of Protein                                     | 220432   | 60266    |
| IPI00018534 | Histone H2B type 1-L                                     | 12303517 | 12052772 |
| IPI00018768 | Translin                                                 | 25717    | 216702   |
| IPI00018873 | Isoform 1 of Nicotinamide                                | 566464   | 617739   |
| IPI00019359 | Keratin, type I cytoskeletal                             | 849592   | 294716   |
| IPI00019385 | Translocon-associated                                    | 76931    | 135403   |
| IPI00019472 | Neutral amino acid                                       | 22735    | 122567   |
| IPI00019502 | Myosin-9                                                 | 12212445 | 12930320 |
| IPI00019755 | Glutathione transferase                                  | 219469   | 290117   |
| IPI00019770 | ubiquitin-like protein fubi<br>and ribosomal protein S30 | 1101836  | 1001440  |
| IPI00019932 | ubiquitin-conjugating                                    | 526544   | 28597    |
| IPI00020042 | Isoform 1 of 26S protease                                | 0        | 83451    |
| IPI00020101 | H2B histone family,                                      | 11195282 | 18252834 |
| IPI00020530 | THIOESTERASE SUPERF                                      | 396668   | 222468   |
| IPI00020599 | Calreticulin precursor                                   | 1110587  | 1184311  |
| IPI00020956 | Hepatoma-derived growth                                  | 1050576  | 236530   |
| IPI00020984 | Calnexin precursor                                       | 2412911  | 2160537  |
| IPI00021048 | Isoform 1 of Myoferlin                                   | 40804    | 98690    |
| IPI00021129 | Isoform 1 of AP-3 complex                                | 64943    | 159893   |
| IPI00021187 | Isoform 1 of RuvB-like 1                                 | 516165   | 731985   |
| IPI00021263 | 14-3-3 protein zeta/delta                                | 15836337 | 31948363 |
| IPI00021290 | ATP-citrate synthase                                     | 534547   | 978187   |
| IPI00021347 | Ubiquitin-conjugating                                    | 828601   | 648632   |
| IPI00021370 | huntingtin interacting                                   | 10824    | 287708   |
| IPI00021405 | Isoform A of Lamin-A/C                                   | 9781212  | 10730705 |
| IPI00021416 | 40 kDa protein                                           | 753636   | 859056   |
| IPI00021428 | Actin, alpha skeletal                                    | 8460931  | 2629643  |
| IPI00021439 | Actin, cytoplasmic 1                                     | 49901330 | 34413536 |
| IPI00021700 | PROLIFERATING CELL N                                     | 161735   | 45702    |
| IPI00021728 | Eukaryotic translation                                   | 414191   | 38683    |
| IPI00021766 | Isoform 1 of Reticulon-4                                 | 918753   | 967110   |
| IPI00021828 | Cystatin B                                               | 2166656  | 2043784  |
| IPI00021831 | cAMP-dependent protein<br>kinase type I-alpha            | 27071    | 281752   |
| IPI00021840 | 40S ribosomal protein S6                                 | 619460   | 34027    |
| IPI00021926 | 26S protease regulatory                                  | 875028   | 1184900  |
| IPI00022143 | Isoform 1 of Protein                                     | 146334   | 205490   |
| IPI00022314 | Superoxide dismutase                                     | 954695   | 306008   |
| IPI00022434 | ALB protein                                              | 311179   | 4135419  |
| IPI00022442 | Acyl carrier protein,                                    | 417406   | 559260   |
| IPI00022694 | Isoform Rpn10A of 26S<br>proteasome non-ATPase           | 196583   | 161489   |
| IPI00022744 | Isoform 1 of Exportin-2                                  | 11146179 | 13169309 |
| IPI00022774 | Transitional endoplasmic                                 | 2106940  | 6487432  |
| IPI00022793 | Trifunctional enzyme beta<br>subunit, mitochondrial      | 968452   | 474911   |
| IPI00022970 | Nucleoprotein TPR                                        | 146366   | 254536   |
| IPI00022977 | Creatine kinase B-type                                   | 27558    | 145548   |
| IPI00023048 | Elongation factor 1-delta                                | 3953268  | 3085335  |
| IPI00023598 | Tubulin beta-4 chain                                     | 126591   | 230055   |

|             |                                                      |          |         |
|-------------|------------------------------------------------------|----------|---------|
| IPI00023640 | Programmed cell death                                | 230267   | 344829  |
| IPI00023748 | Nascent polypeptide-                                 | 2335120  | 2059451 |
| IPI00023785 | Isoform 1 of Probable ATP-dependent RNA helicase     | 769478   | 1652427 |
| IPI00023860 | Nucleosome assembly                                  | 3307835  | 5334790 |
| IPI00023919 | 26S protease regulatory                              | 231941   | 22881   |
| IPI00024067 | clathrin heavy chain 1                               | 8267118  | 9720746 |
| IPI00024145 | Isoform 1 of Voltage-dependent anion-selective       | 2041482  | 2414150 |
| IPI00024157 | FK506-binding protein 3                              | 818711   | 420352  |
| IPI00024175 | Isoform 1 of Proteasome                              | 723494   | 1102443 |
| IPI00024229 | Makorin-3                                            | 73438    | 437778  |
| IPI00024282 | Ras-related protein Rab-8B                           | 1599467  | 1414984 |
| IPI00024320 | Putative RNA-binding                                 | 33561    | 239256  |
| IPI00024364 | Transportin 1 (Importin                              | 33099    | 258623  |
| IPI00024403 | Copine-3                                             | 197374   | 256798  |
| IPI00024664 | Isoform Long of Ubiquitin                            | 466957   | 320913  |
| IPI00024911 | Endoplasmic reticulum                                | 84520    | 263682  |
| IPI00024915 | Isoform Mitochondrial of Peroxiredoxin-5,            | 4244572  | 3073135 |
| IPI00024919 | Thioredoxin-dependent peroxide reductase,            | 3013702  | 3124538 |
| IPI00024933 | 60S ribosomal protein L12                            | 2442329  | 2704628 |
| IPI00024989 | Protein-L-isoaspartate (D-                           | 187794   | 229298  |
| IPI00024993 | Enoyl-CoA hydratase,                                 | 38394    | 0       |
| IPI00025019 | Proteasome subunit beta                              | 575246   | 180720  |
| IPI00025039 | rRNA 2'-O-                                           | 232900   | 21828   |
| IPI00025057 | Isoform 2 of Double-stranded RNA-specific            | 140471   | 171135  |
| IPI00025084 | Calpain small subunit 1                              | 174768   | 400438  |
| IPI00025252 | Protein disulfide-isomerase                          | 3724877  | 2393228 |
| IPI00025273 | Isoform Long of Trifunctional purine                 | 477867   | 433409  |
| IPI00025366 | Citrate synthase,                                    | 70758    | 2274868 |
| IPI00025491 | Eukaryotic initiation factor                         | 2962981  | 4417441 |
| IPI00025512 | Heat-shock protein beta-1                            | 10548742 | 7953018 |
| IPI00025698 | LIM domain kinase 2                                  | 153199   | 121048  |
| IPI00025815 | TAR DNA-binding protein                              | 258885   | 26541   |
| IPI00025849 | Acidic leucine-rich nuclear phosphoprotein 32 family | 1863754  | 3347749 |
| IPI00025874 | Dolichyl-diphosphooligosaccharide--                  | 647183   | 594986  |
| IPI00025974 | Charged multivesicular                               | 126067   | 256687  |
| IPI00026087 | Barrier-to-autointegration                           | 1727778  | 2488550 |
| IPI00026089 | Splicing factor 3B subunit 1                         | 24189    | 91784   |
| IPI00026154 | Glucosidase 2 subunit beta                           | 2079535  | 453750  |
| IPI00026167 | NHP2-like protein 1                                  | 304391   | 29617   |
| IPI00026182 | F-actin capping protein                              | 252825   | 68200   |
| IPI00026185 | Isoform 1 of F-actin                                 | 887678   | 2070017 |
| IPI00026202 | 60S ribosomal protein                                | 693323   | 37206   |
| IPI00026216 | Puromycin-sensitive                                  | 172954   | 324596  |
| IPI00026302 | 60S ribosomal protein L31                            | 1259504  | 39487   |
| IPI00026546 | Platelet-activating factor                           | 57635    | 198723  |
| IPI00026570 | Cytochrome c oxidase polypeptide VIIa-liver/heart,   | 353373   | 174469  |
| IPI00026665 | GlutaminyI-tRNA                                      | 0        | 36624   |

|             |                                                   |         |         |
|-------------|---------------------------------------------------|---------|---------|
| IPI00026781 | Fatty acid synthase                               | 412596  | 1499412 |
| IPI00026970 | FACT complex subunit                              | 131525  | 256422  |
| IPI00027107 | Tu translation elongation                         | 2385926 | 1604125 |
| IPI00027230 | Endoplasmic precursor                             | 6914547 | 6614850 |
| IPI00027252 | Prohibitin-2                                      | 1892043 | 1978346 |
| IPI00027285 | Isoform SM-B' of Small nuclear ribonucleoprotein- | 223469  | 173720  |
| IPI00027434 | Rho-related GTP-binding                           | 47866   | 123070  |
| IPI00027442 | Alanyl-tRNA synthetase,                           | 549444  | 724358  |
| IPI00027493 | 4F2 cell-surface antigen                          | 149033  | 231523  |
| IPI00027497 | Glucose-6-phosphate                               | 370102  | 501593  |
| IPI00027626 | T-complex protein 1                               | 892509  | 2099136 |
| IPI00027809 | Protein phosphatase 3 (Formerly 2B), catalytic    | 289179  | 35044   |
| IPI00027834 | heterogeneous nuclear                             | 2073403 | 1798032 |
| IPI00028004 | Proteasome subunit beta                           | 487148  | 745779  |
| IPI00028006 | Proteasome subunit beta                           | 76394   | 379905  |
| IPI00028055 | Transmembrane emp24 domain-containing protein     | 219784  | 415150  |
| IPI00028091 | Actin-like protein 3                              | 1768376 | 1882161 |
| IPI00028109 | Dpy-30-like protein                               | 34318   | 91296   |
| IPI00028376 | Mitochondrial import inner membrane translocase   | 247277  | 175215  |
| IPI00028888 | Isoform 1 of                                      | 3272801 | 6130348 |
| IPI00029012 | Eukaryotic translation                            | 169114  | 22316   |
| IPI00029091 | Putative nucleoside                               | 239344  | 519210  |
| IPI00029133 | ATP SYNTHASE SUBUNIT                              | 324950  | 424117  |
| IPI00029264 | Cytochrome c1, heme                               | 378169  | 361919  |
| IPI00029444 | UPF0160 protein MYG1                              | 193974  | 0       |
| IPI00029468 | Alpha-centractin                                  | 758159  | 835475  |
| IPI00029601 | Src substrate cortactin                           | 822563  | 746085  |
| IPI00029623 | Proteasome subunit alpha                          | 878660  | 1667199 |
| IPI00029731 | 60S ribosomal protein                             | 13783   | 103198  |
| IPI00029737 | Isoform Long of Long-chain                        | 854975  | 156915  |
| IPI00029740 | sorting nexin 3                                   | 308537  | 453806  |
| IPI00029744 | Single-stranded DNA-binding protein,              | 82113   | 478869  |
| IPI00029750 | Isoform 1 of 40S ribosomal                        | 573883  | 363546  |
| IPI00029997 | 6-PHOSPHOGLUCONOLA                                | 31907   | 304072  |
| IPI00030131 | thymopoietin isoform beta                         | 7839    | 585721  |
| IPI00030154 | Proteasome activator                              | 1282262 | 793509  |
| IPI00030179 | 60S ribosomal protein L7                          | 1964473 | 1175869 |
| IPI00030243 | Isoform 1 of Proteasome                           | 165076  | 328932  |
| IPI00030275 | Heat shock protein 75 kDa,                        | 2075309 | 7133050 |
| IPI00030363 | Acetyl-CoA                                        | 106356  | 196127  |
| IPI00030702 | Isoform 1 of Isocitrate dehydrogenase [NAD]       | 256887  | 17618   |
| IPI00030706 | Activator of 90 kDa heat                          | 427029  | 526599  |
| IPI00030910 | GPI-anchored membrane                             | 149962  | 32446   |
| IPI00031131 | Adipocyte plasma                                  | 446666  | 405383  |
| IPI00031169 | Ras-related protein Rab-2A                        | 407674  | 602194  |
| IPI00031461 | Rab GDP dissociation                              | 1183045 | 1534219 |
| IPI00031522 | Trifunctional enzyme subunit alpha,               | 1939375 | 1293048 |
| IPI00031556 | Splicing factor U2AF 65                           | 689550  | 1130781 |

|             |                                                      |         |         |
|-------------|------------------------------------------------------|---------|---------|
| IPI00031691 | 60S ribosomal protein L9                             | 690322  | 1321649 |
| IPI00031772 | Normal mucosa of                                     | 475654  | 17569   |
| IPI00031801 | Isoform 1 of DNA-binding                             | 675136  | 156332  |
| IPI00031804 | Isoform 1 of Voltage-dependent anion-selective       | 833767  | 897524  |
| IPI00031836 | Developmentally-regulated                            | 31371   | 26885   |
| IPI00032140 | Serpin H1 precursor                                  | 1482860 | 705238  |
| IPI00032406 | DnaJ homolog subfamily A                             | 0       | 21875   |
| IPI00032460 | U6 snRNA-associated Sm-                              | 78112   | 576926  |
| IPI00032826 | Hsc70-interacting protein                            | 1389523 | 1111621 |
| IPI00033025 | Isoform 1 of Septin-7                                | 194587  | 206740  |
| IPI00033494 | Myosin regulatory light                              | 1553251 | 2742256 |
| IPI00034319 | Isoform A of Protein CutA                            | 261320  | 421874  |
| IPI00037448 | Glyoxylate                                           | 203478  | 221356  |
| IPI00045109 | Histone H2A type 1-A                                 | 317769  | 484912  |
| IPI00059292 | Protein mago nashi                                   | 174548  | 225236  |
| IPI00059366 | H2A histone family,                                  | 790356  | 493474  |
| IPI00060181 | EF-hand domain-                                      | 112256  | 221741  |
| IPI00061178 | RNA binding motif protein,                           | 808582  | 999235  |
| IPI00061525 | Glucosamine 6-phosphate                              | 255628  | 348391  |
| IPI00062814 | Chromosome 5 open                                    | 180387  | 211564  |
| IPI00064328 | protein arginine                                     | 96622   | 164134  |
| IPI00068430 | Small nuclear                                        | 254499  | 707041  |
| IPI00074587 | Isoform 1 of FUS-                                    | 135800  | 190854  |
| IPI00075248 | Calmodulin                                           | 1254796 | 3767839 |
| IPI00096066 | Succinyl-CoA ligase [GDP-forming] beta-chain,        | 251911  | 281095  |
| IPI00099463 | SPHINGOSINE-1-PHOSPH                                 | 159110  | 214918  |
| IPI00100160 | Isoform 1 of Cullin-associated NEDD8-                | 931299  | 757015  |
| IPI00100197 | Isoform 1 of NSFL1                                   | 3556    | 407005  |
| IPI00100656 | Isoform 1 of Synaptic                                | 198416  | 159634  |
| IPI00100667 | 39S ribosomal protein L24,                           | 30453   | 13383   |
| IPI00103525 | paraspeckle protein 1                                | 54656   | 506929  |
| IPI00103994 | Leucyl-tRNA synthetase,                              | 494768  | 627371  |
| IPI00105598 | Proteasome 26S non-ATPase subunit 11 variant         | 445160  | 648504  |
| IPI00106509 | Isoform 4 of                                         | 284747  | 678306  |
| IPI00140827 | similar to SMT3 suppressor                           | 232710  | 57527   |
| IPI00141318 | Isoform 1 of Cytoskeleton-                           | 270425  | 521483  |
| IPI00156374 | Isoform 1 of Importin-4                              | 0       | 50089   |
| IPI00157456 | similar to ribosomal protein                         | 33590   | 1765104 |
| IPI00160021 | HIRA interacting protein 5                           | 128200  | 47361   |
| IPI00163187 | Fascin                                               | 436966  | 473370  |
| IPI00165393 | Acidic leucine-rich nuclear phosphoprotein 32 family | 868926  | 1303885 |
| IPI00165467 | 55 kDa protein                                       | 147755  | 250996  |
| IPI00167953 | BTB and kelch domain                                 | 836912  | 1552784 |
| IPI00168184 | CDNA FLJ34068 fis, clone FCBBF3001918, highly        | 551786  | 529736  |
| IPI00168262 | CDNA PSEC0241 fis, clone NT2RP3000234,               | 275591  | 175937  |
| IPI00168479 | apolipoprotein A-I binding                           | 157911  | 0       |
| IPI00169383 | Phosphoglycerate kinase 1                            | 6107797 | 8585033 |
| IPI00171199 | proteasome alpha 3                                   | 384737  | 679858  |

|             |                                               |          |          |
|-------------|-----------------------------------------------|----------|----------|
| IPI00171611 | Histone H3.2                                  | 4976591  | 8412516  |
| IPI00171903 | heterogeneous nuclear                         | 2341049  | 3994962  |
| IPI00176903 | Isoform 1 of Polymerase I                     | 871817   | 1724398  |
| IPI00177728 | Cytosolic nonspecific                         | 104102   | 149163   |
| IPI00177817 | Isoform SERCA2A of Sarcoplasmic/endoplasmic   | 272669   | 397034   |
| IPI00178352 | Isoform 1 of Filamin-C                        | 800427   | 2844336  |
| IPI00178431 | ATP-dependent DNA                             | 254083   | 311996   |
| IPI00178440 | Elongation factor 1-beta                      | 2661565  | 3393095  |
| IPI00179330 | ubiquitin and ribosomal                       | 20222596 | 3137738  |
| IPI00179589 | Myotrophin                                    | 41227    | 625850   |
| IPI00179953 | Isoform 1 of Nuclear                          | 502351   | 895229   |
| IPI00179964 | Isoform 1 of Polypyrimidine                   | 2926305  | 4042596  |
| IPI00180675 | Tubulin alpha-3 chain                         | 2052605  | 303123   |
| IPI00181306 | Isoform 3 of Ubiquitin-                       | 99643    | 245723   |
| IPI00181469 | CDNA FLJ10326 fis, clone NT2RM2000577, weakly | 224963   | 33573    |
| IPI00182533 | 60S RIBOSOMAL PROTEIN                         | 344563   | 83246    |
| IPI00183603 | DC2 protein                                   | 37072    | 210542   |
| IPI00183695 | Protein S100-A10                              | 527405   | 18456    |
| IPI00183968 | tropomyosin 3 isoform 1                       | 808627   | 1397622  |
| IPI00184848 | Bile salt export pump                         | 527010   | 0        |
| IPI00185374 | 26S proteasome non-                           | 205669   | 178612   |
| IPI00186290 | Elongation factor 2                           | 10522488 | 15315094 |
| IPI00215637 | ATP-dependent RNA                             | 393940   | 218146   |
| IPI00215719 | 60S ribosomal protein L18                     | 1417246  | 650751   |
| IPI00215777 | Isoform B of Phosphate carrier protein,       | 1264677  | 907168   |
| IPI00215780 | 40S ribosomal protein S19                     | 2142244  | 1608091  |
| IPI00215790 | 60S ribosomal protein L38                     | 443299   | 634471   |
| IPI00215884 | splicing factor,                              | 809651   | 1688825  |
| IPI00215901 | adenylate kinase 2 isoform                    | 1391988  | 680263   |
| IPI00215911 | DNA-(apurinic or                              | 734332   | 702610   |
| IPI00215914 | ADP-ribosylation factor 1                     | 1388555  | 1548800  |
| IPI00215965 | heterogeneous nuclear                         | 6125160  | 5212965  |
| IPI00215995 | Isoform Alpha-3A of                           | 199711   | 127552   |
| IPI00215998 | CD63 antigen                                  | 84202    | 363134   |
| IPI00216008 | Isoform Long of Glucose-6-                    | 190090   | 283957   |
| IPI00216049 | Isoform 1 of                                  | 5840280  | 8009602  |
| IPI00216085 | Cytochrome c oxidase                          | 763124   | 11201    |
| IPI00216088 | Cellular retinoic acid-                       | 106678   | 15696    |
| IPI00216106 | Isoform 3 of Putative GTP-                    | 184451   | 441469   |
| IPI00216237 | 60S ribosomal protein L36                     | 1012341  | 396059   |
| IPI00216256 | Isoform 2 of WD repeat                        | 408881   | 1047269  |
| IPI00216298 | Thioredoxin                                   | 288738   | 1790026  |
| IPI00216308 | Voltage-dependent anion-                      | 6671215  | 8809900  |
| IPI00216318 | tyrosine 3-monooxygenase/tryptopha            | 0        | 638555   |
| IPI00216319 | 14-3-3 protein eta                            | 30828    | 266914   |
| IPI00216457 | Histone H2A type 2-A                          | 12765455 | 22175666 |
| IPI00216587 | 40S ribosomal protein S8                      | 3388454  | 1156527  |
| IPI00216592 | Isoform C1 of Heterogeneous nuclear           | 5993812  | 6496813  |
| IPI00216659 | Isoform 2 of RNA-binding                      | 876152   | 92436    |
| IPI00216682 | Calponin-3                                    | 341320   | 771746   |



|             |                                                  |          |          |
|-------------|--------------------------------------------------|----------|----------|
| IPI00216691 | Profilin-1                                       | 22474045 | 12216760 |
| IPI00216694 | plastin 3                                        | 1474276  | 1232028  |
| IPI00216951 | Aspartyl-tRNA synthetase,                        | 309685   | 902335   |
| IPI00216975 | Isoform 2 of Tropomyosin                         | 139201   | 858414   |
| IPI00217030 | 40S ribosomal protein S4,                        | 195610   | 709061   |
| IPI00217143 | SDHA protein                                     | 403675   | 303067   |
| IPI00217223 | Multifunctional protein                          | 8693     | 413625   |
| IPI00217236 | Tubulin-specific chaperone                       | 1183341  | 1348281  |
| IPI00217269 | Guanine nucleotide-binding                       | 575570   | 0        |
| IPI00217465 | Histone H1.2                                     | 3530147  | 4103556  |
| IPI00217466 | Histone H1.3                                     | 3589923  | 1432795  |
| IPI00217468 | Histone H1.5                                     | 2873091  | 3470592  |
| IPI00217966 | lactate dehydrogenase A                          | 6484036  | 5829693  |
| IPI00217975 | Lamin-B1                                         | 809665   | 1798347  |
| IPI00218236 | Serine/threonine-protein<br>phosphatase PP1-beta | 1094789  | 1481243  |
| IPI00218342 | C-1-tetrahydrofolate                             | 651315   | 384413   |
| IPI00218493 | Hypoxanthine-guanine                             | 99263    | 328237   |
| IPI00218606 | 40S ribosomal protein S23                        | 202542   | 424844   |
| IPI00218733 | 16 kDa protein                                   | 3541587  | 3262252  |
| IPI00218918 | Annexin A1                                       | 9230399  | 11483885 |
| IPI00219005 | FK506-binding protein 4                          | 743538   | 1723453  |
| IPI00219018 | Glyceraldehyde-3-                                | 35857979 | 44336325 |
| IPI00219025 | Glutaredoxin-1                                   | 208293   | 29777    |
| IPI00219029 | Aspartate                                        | 704853   | 163344   |
| IPI00219034 | NADH DEHYDROGENASE                               | 102011   | 143905   |
| IPI00219097 | High mobility group protein                      | 735307   | 24260    |
| IPI00219153 | 60S ribosomal protein L22                        | 1526431  | 984171   |
| IPI00219155 | 60S ribosomal protein L27                        | 1916495  | 1155806  |
| IPI00219156 | 60S ribosomal protein L30                        | 230421   | 1129217  |
| IPI00219160 | 60S ribosomal protein L34                        | 1179707  | 1396344  |
| IPI00219217 | L-lactate dehydrogenase B                        | 14149886 | 17223758 |
| IPI00219219 | Galectin-1                                       | 16106531 | 11984815 |
| IPI00219229 | U6 snRNA-associated Sm-                          | 473841   | 743019   |
| IPI00219330 | Isoform 5 of Interleukin                         | 423769   | 867795   |
| IPI00219365 | Moesin                                           | 1886001  | 731093   |
| IPI00219446 | Phosphatidylethanolamine-                        | 280109   | 499370   |
| IPI00219483 | ISOFORM 2 OF U1 SMALL                            | 218821   | 265227   |
| IPI00219525 | 6-phosphogluconate                               | 338592   | 40186    |
| IPI00219575 | Bleomycin hydrolase                              | 49542    | 15981    |
| IPI00219622 | Proteasome subunit alpha                         | 832834   | 848632   |
| IPI00219678 | Eukaryotic translation                           | 832379   | 1468339  |
| IPI00219757 | Glutathione S-transferase                        | 2436452  | 3383332  |
| IPI00219840 | Isoform 1 of AP-2 complex                        | 303310   | 40374    |
| IPI00219871 | U6 snRNA-associated Sm-                          | 252091   | 296275   |
| IPI00219913 | Ubiquitin carboxyl-terminal                      | 168211   | 7099     |
| IPI00219953 | cytidylate kinase                                | 47120    | 391706   |
| IPI00220113 | Isoform 2 of Microtubule-                        | 428723   | 530525   |
| IPI00220167 | CDNA FLJ36979 fis, clone                         | 321024   | 127721   |
| IPI00220301 | Peroxiredoxin-6                                  | 3819178  | 4192424  |
| IPI00220327 | Keratin, type II cytoskeletal                    | 2586895  | 1669563  |
| IPI00220362 | 10 kDa heat shock protein,                       | 8780234  | 1876512  |
| IPI00220365 | EIF4G1 variant protein                           | 47750    | 241673   |
| IPI00220487 | ATP synthase, H+<br>transporting, mitochondrial  | 872035   | 422306   |

|             |                                                         |         |         |
|-------------|---------------------------------------------------------|---------|---------|
| IPI00220503 | dynactin 2                                              | 66897   | 382984  |
| IPI00220637 | Seryl-tRNA synthetase,                                  | 40990   | 0       |
| IPI00220709 | Isoform 2 of Tropomyosin                                | 556142  | 6540933 |
| IPI00220740 | Isoform 2 of                                            | 9420305 | 9463373 |
| IPI00220766 | Lactoylglutathione lyase                                | 426311  | 656602  |
| IPI00220834 | ATP-dependent DNA                                       | 1505505 | 2944315 |
| IPI00220991 | Hypothetical protein                                    | 597054  | 485844  |
| IPI00221088 | 40S ribosomal protein S9                                | 731224  | 1210305 |
| IPI00221089 | 40S ribosomal protein S13                               | 2545892 | 1971165 |
| IPI00221091 | 40S ribosomal protein                                   | 22581   | 927018  |
| IPI00221092 | 40S ribosomal protein S16                               | 974305  | 938586  |
| IPI00221093 | 40S ribosomal protein S17                               | 826384  | 915419  |
| IPI00221178 | Isoform 2 of Tumor protein                              | 563535  | 1873313 |
| IPI00221222 | Activated RNA polymerase II transcriptional coactivator | 2898129 | 432396  |
| IPI00221224 | Aminopeptidase N                                        | 239620  | 88793   |
| IPI00221232 | Guanine nucleotide-binding protein G(I)/G(S)/G(O)       | 1077479 | 610078  |
| IPI00221240 | Isoform 2 of Leucyl-cystinyl                            | 13067   | 63379   |
| IPI00247583 | 60S ribosomal protein L21                               | 600338  | 888261  |
| IPI00288940 | ISOFORM 1 OF OBSCURIN                                   | 190037  | 46558   |
| IPI00289334 | Isoform 1 of Filamin-B                                  | 88541   | 882457  |
| IPI00289499 | Bifunctional purine                                     | 497560  | 826815  |
| IPI00289758 | Calpain-2 catalytic subunit                             | 1031231 | 1433453 |
| IPI00290416 | Isoform 1 of Putative GTP-                              | 329901  | 663243  |
| IPI00290460 | Eukaryotic translation                                  | 308599  | 775625  |
| IPI00290566 | T-complex protein 1                                     | 238767  | 927489  |
| IPI00290770 | chaperonin containing                                   | 1003785 | 1423961 |
| IPI00291005 | Malate dehydrogenase,                                   | 2128106 | 1221435 |
| IPI00291006 | Malate dehydrogenase,                                   | 9153684 | 6030680 |
| IPI00291175 | vinculin isoform VCL                                    | 5008672 | 3982693 |
| IPI00291510 | Inosine-5'-monophosphate                                | 457043  | 555596  |
| IPI00291669 | Ubiquitin-like domain-                                  | 217872  | 9365    |
| IPI00291922 | Proteasome subunit alpha                                | 1120669 | 966064  |
| IPI00293276 | Macrophage migration                                    | 2747408 | 4156129 |
| IPI00293434 | Signal recognition particle                             | 790928  | 458445  |
| IPI00293464 | DNA damage-binding                                      | 157442  | 155800  |
| IPI00293533 | Nuclear pore glycoprotein                               | 17810   | 152089  |
| IPI00293665 | Keratin, type II cytoskeletal                           | 144698  | 46806   |
| IPI00294380 | Phosphoenolpyruvate carboxykinase [GTP],                | 172155  | 136687  |
| IPI00294536 | Serine-threonine kinase                                 | 151259  | 86033   |
| IPI00294962 | Isoform 1 of SH3-domain                                 | 115642  | 216678  |
| IPI00295741 | Cathepsin B precursor                                   | 1182466 | 630620  |
| IPI00295813 | hypothetical protein                                    | 395901  | 536624  |
| IPI00295857 | Coatomer subunit alpha                                  | 242109  | 176823  |
| IPI00296022 | Ubiquinol-cytochrome c reductase complex 11 kDa         | 1158355 | 1151009 |
| IPI00296053 | Isoform Mitochondrial of Fumarate hydratase,            | 443663  | 319307  |
| IPI00296337 | Isoform 1 of DNA-dependent protein kinase               | 3324808 | 2865472 |
| IPI00296913 | ADP-sugar                                               | 366758  | 210372  |
| IPI00297084 | dolichyl-diphosphooligosaccharide-                      | 353757  | 365349  |

|             |                                                   |          |          |
|-------------|---------------------------------------------------|----------|----------|
| IPI00297160 | CD44 antigen isoform 4                            | 747665   | 649948   |
| IPI00297779 | T-complex protein 1                               | 3024515  | 3605682  |
| IPI00297982 | Eukaryotic translation                            | 1205045  | 472623   |
| IPI00298363 | Far upstream element-                             | 257822   | 1047058  |
| IPI00298406 | Isoform 2 of Hydroxyacyl-coenzyme A               | 138158   | 78137    |
| IPI00298547 | Protein DJ-1                                      | 911107   | 4323071  |
| IPI00298961 | Exportin-1                                        | 138991   | 167366   |
| IPI00298994 | 271 kDa protein                                   | 895204   | 1026712  |
| IPI00299000 | Proliferation-associated                          | 3497112  | 1716210  |
| IPI00299155 | Proteasome subunit alpha                          | 819171   | 826212   |
| IPI00299571 | Isoform 2 of Protein                              | 5386558  | 3785755  |
| IPI00299573 | 60S ribosomal protein L7a                         | 1813043  | 1761951  |
| IPI00299608 | Isoform 1 of 26S proteasome non-ATPase            | 198689   | 161343   |
| IPI00300074 | Phenylalanyl-tRNA                                 | 214296   | 250942   |
| IPI00300371 | Splicing factor 3B subunit 3                      | 359791   | 401263   |
| IPI00301058 | Vasodilator-stimulated                            | 18373    | 129482   |
| IPI00301311 | Isoform 2 of Protein SET                          | 1004106  | 6513781  |
| IPI00301936 | ELAV-like protein 1                               | 671535   | 543461   |
| IPI00302592 | filamin A, alpha                                  | 26059773 | 26647398 |
| IPI00302840 | Sodium/potassium-                                 | 371487   | 527854   |
| IPI00302925 | Chaperonin containing                             | 1956445  | 2468634  |
| IPI00302927 | T-complex protein 1                               | 2651900  | 2880367  |
| IPI00303207 | ATP-binding cassette sub-                         | 341926   | 236584   |
| IPI00303476 | ATP synthase subunit                              | 9422433  | 14894864 |
| IPI00303882 | Isoform B of Mannose-6-phosphate receptor-binding | 4447549  | 4532583  |
| IPI00304409 | Calcium-regulated heat                            | 313377   | 633187   |
| IPI00304596 | Non-POU domain-                                   | 227139   | 567752   |
| IPI00304925 | Heat shock 70 kDa protein                         | 7464492  | 6493885  |
| IPI00305383 | Ubiquinol-cytochrome-c reductase complex core     | 577908   | 270110   |
| IPI00305692 | Thioredoxin-like protein 1                        | 177392   | 195343   |
| IPI00306301 | Pyruvate dehydrogenase E1 component alpha         | 181682   | 66927    |
| IPI00306332 | 60S ribosomal protein L24                         | 600144   | 498695   |
| IPI00306398 | NudC domain containing 1                          | 242216   | 329106   |
| IPI00306516 | Import inner membrane translocase subunit TIM44,  | 240251   | 0        |
| IPI00306960 | Asparaginyl-tRNA                                  | 1396973  | 1011154  |
| IPI00328154 | NEDD8-activating enzyme                           | 168909   | 10374    |
| IPI00328257 | Isoform A of AP-1 complex                         | 240869   | 252338   |
| IPI00328293 | SerineVarginine repetitive                        | 142574   | 31979    |
| IPI00328319 | Histone-binding protein                           | 1198659  | 839855   |
| IPI00328350 | Niban protein                                     | 107166   | 35293    |
| IPI00328840 | THO complex subunit 4                             | 363303   | 159942   |
| IPI00329389 | 60S ribosomal protein L6                          | 673726   | 1004575  |
| IPI00329633 | Threonyl-tRNA synthetase,                         | 883840   | 1330303  |
| IPI00329745 | CDNA FLJ43793 fis, clone TESTI4000014, highly     | 605037   | 484766   |
| IPI00329801 | Annexin A5                                        | 5177916  | 7959417  |
| IPI00333215 | Isoform 1 of Transcription                        | 230726   | 233226   |
| IPI00334159 | Von Hippel-Lindau binding                         | 187214   | 305983   |
| IPI00334190 | Stomatin-like protein 2                           | 96599    | 77567    |
| IPI00334276 | CDNA FLJ25727 fis, clone                          | 197374   | 14644    |

|             |                                                         |          |          |
|-------------|---------------------------------------------------------|----------|----------|
| IPI00334587 | Isoform 2 of                                            | 2309924  | 3551338  |
| IPI00334775 | 85 kDa protein                                          | 24281394 | 24580878 |
| IPI00335061 | Pyrroline-5-carboxylate                                 | 73265    | 39537    |
| IPI00335132 | 22 kDa protein                                          | 1059415  | 24260    |
| IPI00335168 | myosin, light chain 6, alkali, smooth muscle and non-   | 1674640  | 1639624  |
| IPI00337736 | Isoform 2 of Kinectin                                   | 667646   | 556772   |
| IPI00375441 | Isoform 1 of Far upstream                               | 163475   | 40444    |
| IPI00375631 | Interferon-induced 17 kDa                               | 158510   | 253745   |
| IPI00376005 | Isoform 2 of Eukaryotic                                 | 3637428  | 3908915  |
| IPI00376798 | ribosomal protein L11                                   | 2268646  | 2779420  |
| IPI00382470 | Heat shock protein HSP 90-                              | 6120460  | 6561477  |
| IPI00382869 | Farnesyl pyrophosphate synthetase like-4 protein        | 360257   | 762079   |
| IPI00383531 | PRKCDBP protein                                         | 339251   | 202764   |
| IPI00383539 | citrate synthase precursor,                             | 313518   | 44849    |
| IPI00383680 | OTTHUMP00000030902                                      | 17808    | 292868   |
| IPI00383751 | CALRETICULIN=CALCIU                                     | 753953   | 1440218  |
| IPI00384016 | Full-length cDNA 5-PRIME end of clone                   | 325161   | 247625   |
| IPI00384051 | Proteasome activator                                    | 363801   | 547713   |
| IPI00386119 | Isoform 5 of Splicing factor                            | 60439    | 102929   |
| IPI00387144 | Tubulin alpha-ubiquitous                                | 23553551 | 15464095 |
| IPI00395627 | Isoform 1 of Calcyclin-                                 | 2690001  | 1498333  |
| IPI00395769 | Isoform Heart of ATP synthase gamma chain,              | 654959   | 542454   |
| IPI00395887 | Thioredoxin domain-                                     | 145234   | 158881   |
| IPI00396321 | Leucine-rich repeat-                                    | 221807   | 582310   |
| IPI00396370 | Isoform 1 of Eukaryotic translation initiation factor 3 | 629019   | 756695   |
| IPI00396378 | Isoform B1 of Heterogeneous nuclear                     | 11883430 | 6161355  |
| IPI00396435 | DEAH (Asp-Glu-Ala-His)                                  | 1287848  | 1374015  |
| IPI00396485 | Elongation factor 1-alpha 1                             | 28161045 | 43722379 |
| IPI00397191 | similar to peptidylprolyl                               | 4223584  | 36654    |
| IPI00398135 | similar to 60S ribosomal                                | 2983480  | 1218863  |
| IPI00398985 | similar to Fatty acid-binding                           | 563429   | 100776   |
| IPI00410034 | Putative 40-9-1 protein                                 | 29706    | 134758   |
| IPI00410693 | Isoform 1 of Plasminogen activator inhibitor 1 RNA-     | 955810   | 1154199  |
| IPI00411633 | Heat shock protein beta                                 | 601228   | 92867    |
| IPI00411984 | Serine/threonine-protein                                | 64976    | 52847    |
| IPI00412545 | Hypothetical protein                                    | 297626   | 167362   |
| IPI00412579 | 60S ribosomal protein                                   | 1702392  | 621561   |
| IPI00413108 | Ribosomal protein SA                                    | 3622107  | 5114640  |
| IPI00413451 | Hypothetical protein                                    | 284869   | 287656   |
| IPI00413778 | FKBP1A protein                                          | 201782   | 330099   |
| IPI00414320 | Annexin A11                                             | 245014   | 494144   |
| IPI00414860 | 60S RIBOSOMAL PROTEIN                                   | 194254   | 14600    |
| IPI00418169 | annexin A2 isoform 1                                    | 9801347  | 9485744  |
| IPI00418471 | Vimentin                                                | 49401611 | 54564486 |
| IPI00419373 | Isoform 1 of                                            | 1195550  | 1621678  |
| IPI00419585 | Peptidyl-prolyl cis-trans                               | 12035543 | 14364172 |
| IPI00419880 | 40S ribosomal protein S3a                               | 2151887  | 1712397  |
| IPI00420014 | U5 small nuclear                                        | 0        | 102976   |

|             |                                               |          |          |
|-------------|-----------------------------------------------|----------|----------|
| IPI00420096 | plectin 1 isoform 3                           | 1872421  | 2106716  |
| IPI00429191 | Eukaryotic peptide chain                      | 142085   | 192479   |
| IPI00430812 | Zinc finger protein 9                         | 841424   | 1047223  |
| IPI00439944 | ARCN1 protein                                 | 25213    | 129127   |
| IPI00440493 | ATP synthase subunit                          | 5779946  | 7341435  |
| IPI00442073 | Cysteine and glycine-rich                     | 463253   | 891907   |
| IPI00442168 | CDNA FLJ16632 fis, clone TESTI4024387, highly | 107678   | 354724   |
| IPI00442278 | CDNA FLJ16223 fis, clone                      | 4834785  | 2339108  |
| IPI00443909 | Isoform 1 of MIR-                             | 964669   | 1303624  |
| IPI00444262 | CDNA FLJ45706 fis, clone FEBRA2028457, highly | 7268281  | 10644384 |
| IPI00449049 | Poly [ADP-ribose]                             | 378828   | 739591   |
| IPI00453473 | Histone H4                                    | 21709472 | 28416033 |
| IPI00453476 | similar to Phosphoglycerate mutase            | 2106965  | 3572965  |
| IPI00455033 | ISOFORM 3 OF SEPTIN-9                         | 0        | 66639    |
| IPI00455153 | HIRA interacting protein 5                    | 128200   | 322943   |
| IPI00455457 | Novel protein similar to                      | 287734   | 334641   |
| IPI00456887 | Scaffold attachment factor                    | 231250   | 247953   |
| IPI00456898 | similar to ribosomal protein                  | 1110030  | 197299   |
| IPI00456969 | Dynein heavy chain,                           | 194086   | 172109   |
| IPI00465028 | Triosephosphate                               | 11794089 | 16442846 |
| IPI00465044 | <a href="#">PROTEIN RCC2</a>                  | 159110   | 214918   |
| IPI00465233 | DJ1014D13.1 protein                           | 58596    | 144113   |
| IPI00465248 | enolase 1                                     | 26917869 | 22361820 |
| IPI00465260 | GARS protein                                  | 1710136  | 1560195  |
| IPI00465315 | Cytochrome c                                  | 463206   | 755089   |
| IPI00465361 | 60S ribosomal protein L13                     | 1433899  | 1303996  |
| IPI00465430 | 70 kDa protein                                | 5600949  | 2019242  |
| IPI00465431 | Galectin-3                                    | 719570   | 1577799  |
| IPI00465439 | Fructose-bisphosphate                         | 1247166  | 3658015  |
| IPI00470525 | Glycogen phosphorylase,                       | 608028   | 336091   |
| IPI00470528 | 60S ribosomal protein L15                     | 527799   | 315496   |
| IPI00472102 | 61 kDa protein                                | 15430880 | 13868321 |
| IPI00472943 | HLA class I histocompatibility antigen,       | 2507557  | 4706388  |
| IPI00473014 | Destrin                                       | 198826   | 536963   |
| IPI00477313 | Isoform C2 of Heterogeneous nuclear           | 3770724  | 6434867  |
| IPI00478011 | 21 kDa protein                                | 165501   | 412153   |
| IPI00478292 | Isoform 1 of Spectrin alpha                   | 259944   | 338933   |
| IPI00478539 | similar to Heterogeneous                      | 4433788  | 9279581  |
| IPI00479186 | pyruvate kinase 3 isoform                     | 22591382 | 31669261 |
| IPI00479217 | heterogeneous nuclear                         | 7153969  | 4324431  |
| IPI00479366 | 31 kDa protein                                | 1622867  | 1542319  |
| IPI00479786 | KH-type splicing regulatory                   | 1132627  | 1540895  |
| IPI00479997 | Stathmin                                      | 619363   | 2907640  |
| IPI00549343 | Vesicle-associated                            | 353837   | 421165   |
| IPI00549672 | HSPC027                                       | 459759   | 284216   |
| IPI00550021 | 60S ribosomal protein L3                      | 1858449  | 1539578  |
| IPI00550069 | Ribonuclease inhibitor                        | 869685   | 622602   |
| IPI00550363 | Transgelin-2                                  | 3232028  | 2821493  |
| IPI00550364 | Phosphoglucomutase-2                          | 72352    | 210891   |
| IPI00550689 | UPF0027 protein C22orf28                      | 38789    | 80176    |

|             |                                                   |          |          |
|-------------|---------------------------------------------------|----------|----------|
| IPI00550746 | Nuclear migration protein                         | 7202     | 370676   |
| IPI00550894 | Glucosamine-6-phosphate                           | 498861   | 604229   |
| IPI00550917 | Twinfilin-2                                       | 470328   | 609797   |
| IPI00552036 | ATP synthase F0 subunit 6                         | 176442   | 725328   |
| IPI00553169 | Filamin A, alpha                                  | 192148   | 63957    |
| IPI00554648 | Keratin, type II cytoskeletal                     | 6002607  | 5486068  |
| IPI00554788 | 49 kDa protein                                    | 3640540  | 7318649  |
| IPI00554811 | Actin-related protein 2/3                         | 917256   | 1292557  |
| IPI00555610 | 313 kDa protein                                   | 3458019  | 7267219  |
| IPI00555902 | OCIA domain containing 2                          | 270642   | 135914   |
| IPI00555956 | Proteasome subunit beta                           | 301136   | 640707   |
| IPI00604590 | NME1-NME2 protein                                 | 12158237 | 12353951 |
| IPI00641582 | BAG family molecular                              | 109116   | 312204   |
| IPI00641829 | BAT1 protein                                      | 2868182  | 1908719  |
| IPI00641950 | Lung cancer oncogene 7                            | 3535304  | 900665   |
| IPI00642513 | similar to ribosomal protein                      | 790133   | 168911   |
| IPI00642542 | DJ639P13.2.2                                      | 458452   | 522026   |
| IPI00642816 | Signal recognition particle                       | 2228814  | 1440007  |
| IPI00642982 | Hypothetical protein                              | 567290   | 618229   |
| IPI00643041 | GTP-binding nuclear                               | 6599781  | 6823470  |
| IPI00643920 | Transketolase                                     | 4628220  | 4496273  |
| IPI00644127 | Isoleucyl-tRNA synthetase,                        | 217281   | 0        |
| IPI00645078 | Ubiquitin-activating                              | 1286133  | 1979578  |
| IPI00645194 | integrin beta 1 isoform 1A                        | 118656   | 393380   |
| IPI00646240 | HIST2H3PS2 protein                                | 786410   | 305417   |
| IPI00646304 | peptidylprolyl isomerase B                        | 1419584  | 1286149  |
| IPI00646425 | similar to Valyl-tRNA<br>synthetase (Valine--tRNA | 230651   | 73123    |
| IPI00646689 | Thioredoxin-like protein 5                        | 499793   | 19745    |
| IPI00646779 | TUBB6 protein                                     | 424111   | 614105   |
| IPI00647337 | OTTHUMP00000016411                                | 410819   | 467849   |
| IPI00647421 | 16 kDa protein                                    | 76931    | 135403   |
| IPI00719622 | 40S ribosomal protein S28                         | 381770   | 2224373  |
| IPI00719633 | RELA protein                                      | 631514   | 1772765  |
| IPI00742805 | 15 kDa protein                                    | 505843   | 11246    |
| IPI00742905 | ATP-dependent RNA                                 | 663549   | 740180   |
| IPI00744618 | Stathmin 1 variant                                | 6037167  | 1383921  |
| IPI00746388 | Ezrin                                             | 1291557  | 1221825  |
| IPI00746655 | Isoform 2 of Protein                              | 146334   | 205490   |
| IPI00747533 | 53 kDa protein                                    | 190831   | 680881   |
| IPI00747849 | Isoform 1 of<br>Sodium/potassium-                 | 58933    | 64554    |
| IPI00759493 | succinate-CoA ligase, GDP-                        | 351402   | 366596   |
| IPI00759723 | Isoform Monomeric of<br>Arginyl-tRNA synthetase,  | 322053   | 71279    |
| IPI00784008 | Importin-7                                        | 256457   | 520723   |
| IPI00784347 | Keratin, type I cytoskeletal                      | 2281925  | 2932682  |
| IPI00786968 | similar to Destrin                                | 2880     | 536963   |
| IPI00787396 | similar to Guanine<br>nucleotide-binding protein  | 575570   | 596438   |
| IPI00787885 | similar to 60S ribosomal                          | 318033   | 227037   |
| IPI00790262 | 72 kDa protein                                    | 80776    | 337553   |
| IPI00790498 | Protein                                           | 444283   | 499009   |
| IPI00793199 | annexin IV                                        | 69274    | 179771   |
| IPI00794530 | Isoform 2 of General                              | 104984   | 397769   |
| IPI00794605 | 18 kDa protein                                    | 437261   | 272673   |

|             |                |         |         |
|-------------|----------------|---------|---------|
| IPI00794894 | Protein        | 1047268 | 1610600 |
| IPI00797321 | 21 kDa protein | 194086  | 172109  |
