# Supplementary material
Source: PubMed Central journal article supplement (PMC2689776)
Supplement: M800274-MCP200_3.pdf [file M800274-MCP200_3.pdf]

## Suppl Table 1: August Control Peptides

| Scan# | Rank | IPI0000000# | Score# | Top score | Sequence                | Pep.Lengt | m/z    | Neutral mass (exp) |
|-------|------|-------------|--------|-----------|-------------------------|-----------|--------|--------------------|
| 3650  | 1    | IPI00418471 | 72,6   | 72,6      | FADLSEAANR              | 10        | 547,27 | 1092,519           |
| 7130  | 1    | IPI00418471 | 64,6   | 64,6      | EYQDLLNVK               | 9         | 561,29 | 1120,575           |
| 12602 | 1    | IPI00418471 | 81,7   | 81,7      | ILLAELEQLK              | 10        | 585,36 | 1168,7043          |
| 4090  | 1    | IPI00418471 | 56,3   | 56,3      | LGDLYEEE(M)R            | 10        | 635,78 | 1269,5529          |
| 7068  | 1    | IPI00418471 | 66,9   | 66,9      | NLQEAEWYK               | 10        | 655,31 | 1308,5974          |
| 9834  | 1    | IPI00418471 | 70,2   | 70,2      | (M)ALDIEIATYR           | 11        | 656,33 | 1310,652           |
| 4953  | 1    | IPI00418471 | 62,5   | 62,5      | EEAENTLQSF              | 11        | 662,31 | 1322,6082          |
| 13417 | 1    | IPI00418471 | 92     | 92        | VESLQEEIAFLK            | 12        | 703,38 | 1404,7494          |
| 4943  | 1    | IPI00418471 | 55,6   | 55,6      | SLYASSPGGVYATR          | 14        | 714,86 | 1427,7019          |
| 8123  | 1    | IPI00418471 | 67,2   | 67,2      | QVQSLTCEVDALK           | 13        | 745,88 | 1489,743           |
| 10944 | 1    | IPI00418471 | 97     | 97        | KVESLQEEIAFLK           | 13        | 767,43 | 1532,8438          |
| 16741 | 1    | IPI00418471 | 30,6   | 30,6      | ISLPLPNFSSLNLR          | 14        | 524,30 | 1569,8865          |
| 8073  | 1    | IPI00418471 | 56,3   | 56,3      | ETNLDSLPLVDTHSK         | 15        | 834,93 | 1667,8364          |
| 2720  | 2    | IPI00479186 | 38,9   | 38,9      | PVAVALDTK               | 9         | 457,27 | 912,5268           |
| 8991  | 2    | IPI00479186 | 29,4   | 29,4      | GIFPVLCK                | 8         | 467,26 | 932,5136           |
| 2595  | 2    | IPI00479186 | 49,5   | 49,5      | VNFA(M)NVGK             | 9         | 498,25 | 994,4893           |
| 4573  | 2    | IPI00479186 | 66,3   | 66,3      | GDYPLEAVR               | 9         | 510,26 | 1018,5072          |
| 7773  | 2    | IPI00479186 | 45,7   | 45,7      | GDLGIEIPA EK            | 11        | 571,31 | 1140,6018          |
| 5883  | 2    | IPI00479186 | 38,4   | 38,4      | ITLDNAYMEK              | 10        | 599,29 | 1196,5739          |
| 6973  | 2    | IPI00479186 | 44,5   | 44,5      | LDIDSPITAR              | 11        | 599,33 | 1196,6385          |
| 4015  | 2    | IPI00479186 | 77,4   | 77,4      | ITLDNAY(M)EK            | 10        | 607,29 | 1212,5681          |
| 5703  | 2    | IPI00479186 | 67,8   | 67,8      | NTGIICTIGPASR           | 13        | 680,36 | 1358,6954          |
| 13172 | 2    | IPI00479186 | 81,8   | 81,8      | IYVDDGLISLQVK           | 13        | 731,91 | 1461,8076          |
| 9196  | 2    | IPI00479186 | 62,1   | 62,1      | TATESFASDPILYR          | 14        | 785,89 | 1569,7657          |
| 11312 | 2    | IPI00479186 | 95     | 95        | GVNLPGAAVDLPAVSEK       | 17        | 818,95 | 1635,8823          |
| 12934 | 2    | IPI00479186 | 36,1   | 36,1      | GADFLVTEVENGGSLGSK      | 18        | 890,44 | 1778,8699          |
| 15432 | 2    | IPI00479186 | 83,9   | 83,9      | LAPITSDPTEATAVGAVEASFK  | 22        | 725,71 | 2174,1086          |
| 14807 | 2    | IPI00479186 | 39,9   | 39,9      | TATESFASDPILYRPVAVALDTK | 23        | 822,44 | 2464,2852          |
| 3367  | 3    | IPI00465248 | 40,1   | 40,1      | SCNCLLLK                | 8         | 504,25 | 1006,4922          |

|       |   |             |      |      |                         |    |         |           |
|-------|---|-------------|------|------|-------------------------|----|---------|-----------|
| 2041  | 3 | IPI00465248 | 29,4 | 29,4 | L(M)IE(M)DGTENK         | 11 | 656,79  | 1311,5684 |
| 12372 | 3 | IPI00465248 | 54,2 | 54,2 | YISPDQLADLYK            | 12 | 713,37  | 1424,7172 |
| 12772 | 3 | IPI00465248 | 95,5 | 95,5 | VVIG(M)DVAASEFFR        | 14 | 778,89  | 1555,769  |
| 6898  | 3 | IPI00465248 | 93,5 | 93,5 | VNQIGSVTESLQACK         | 15 | 817,41  | 1632,812  |
| 13287 | 3 | IPI00465248 | 69,5 | 69,5 | AAVPSGASTGIYEALELR      | 18 | 902,97  | 1803,9346 |
| 7318  | 4 | IPI00021439 | 43,9 | 43,9 | AVFPSIVGR               | 9  | 473,28  | 944,5433  |
| 8700  | 4 | IPI00021439 | 34,2 | 34,2 | DLTDYL(M)K              | 8  | 507,74  | 1013,4725 |
| 3365  | 4 | IPI00021439 | 59,4 | 59,4 | GYSFTTTAER              | 10 | 566,77  | 1131,5171 |
| 4905  | 4 | IPI00021439 | 52,1 | 52,1 | EITALAPSTMK             | 11 | 581,31  | 1160,6096 |
| 3115  | 4 | IPI00021439 | 38,8 | 38,8 | EITALAPST(M)K           | 11 | 589,31  | 1176,6033 |
| 4698  | 4 | IPI00021439 | 48,7 | 48,7 | IWHHTFYNELR             | 11 | 758,38  | 1514,743  |
| 12692 | 4 | IPI00021439 | 69,3 | 69,3 | SYELPDGQVITIGNER        | 16 | 895,95  | 1789,8813 |
| 10487 | 4 | IPI00021439 | 37,2 | 37,2 | YPIEHGIVTNWDDMEK        | 16 | 649,64  | 1945,8853 |
| 8153  | 4 | IPI00021439 | 63,5 | 63,5 | VAPEEHPVLLTEAPLNPK      | 18 | 977,53  | 1953,0536 |
| 8420  | 4 | IPI00021439 | 34,9 | 34,9 | YPIEHGIVTNWDD(M)EK      | 16 | 981,95  | 1961,8787 |
| 13297 | 4 | IPI00021439 | 69,4 | 69,4 | DLYANTVLSGGTT(M)YPGIADR | 21 | 1116,03 | 2230,0549 |
| 8293  | 5 | IPI00302592 | 48,6 | 48,6 | LDVQFSGLTK              | 10 | 554,31  | 1106,5955 |
| 7313  | 5 | IPI00302592 | 52,8 | 52,8 | AWGPGLEGGVVGK           | 13 | 613,83  | 1225,644  |
| 16411 | 5 | IPI00302592 | 68,3 | 68,3 | LIALLEVLSQK             | 11 | 613,89  | 1225,7635 |
| 6228  | 5 | IPI00302592 | 52,7 | 52,7 | LTVSSLQESGLK            | 12 | 631,35  | 1260,6912 |
| 5105  | 5 | IPI00302592 | 50,6 | 50,6 | YGGQPVPNFPSK            | 12 | 645,83  | 1289,6384 |
| 9266  | 5 | IPI00302592 | 86,5 | 86,5 | IANLQTDLSDGLR           | 13 | 708,38  | 1414,7408 |
| 6470  | 5 | IPI00302592 | 66,7 | 66,7 | EAGAGGLAIAVEGPSK        | 16 | 713,88  | 1425,7446 |
| 3837  | 5 | IPI00302592 | 39,4 | 39,4 | AFGPGLQGGSAGSPAR        | 16 | 715,36  | 1428,7087 |
| 6123  | 5 | IPI00302592 | 38,8 | 38,8 | ANLPQSFQVDTSK           | 13 | 717,86  | 1433,7139 |
| 12252 | 5 | IPI00302592 | 54,1 | 54,1 | SPFSVAVSPSLDLSK         | 15 | 767,41  | 1532,8073 |
| 6273  | 5 | IPI00302592 | 81,9 | 81,9 | GAGTGGLGLAVEGPSEAK      | 18 | 785,91  | 1569,7983 |
| 6028  | 5 | IPI00302592 | 76   | 76   | VANPSGNLTETYVQDR        | 16 | 882,43  | 1762,8475 |
| 7948  | 5 | IPI00302592 | 92,5 | 92,5 | VQVQDNEGCPVEALVK        | 16 | 892,95  | 1783,876  |
| 5188  | 5 | IPI00302592 | 42,4 | 42,4 | SPYTVTVGQACNPSACR       | 17 | 934,42  | 1866,8342 |

|       |               |      |                                          |    |         |           |
|-------|---------------|------|------------------------------------------|----|---------|-----------|
| 11604 | 5 IPI00302592 | 41,1 | 41,1 VTYCPTEPGNYIINIK                    | 16 | 941,47  | 1880,9315 |
| 8976  | 5 IPI00302592 | 35,6 | 35,6 VHSPSGALEECYVTEIDQDK                | 20 | 759,68  | 2276,0244 |
| 10844 | 5 IPI00302592 | 34,9 | 34,9 YTPVQQGPVGVNVTYGGDPIPK              | 22 | 762,73  | 2285,1658 |
| 8055  | 5 IPI00302592 | 46,9 | 46,9 SAGQGEVLVYVEDPAGHQEEAK              | 22 | 771,70  | 2312,0891 |
| 12967 | 5 IPI00302592 | 45   | 45 FNEEHIPDSPFVVPVASPSGDAR               | 23 | 823,07  | 2466,1812 |
| 13832 | 5 IPI00302592 | 48,2 | 48,2 LQVEPAVDTSQVQCYGPGIEGQGVFR          | 26 | 921,78  | 2762,3296 |
| 14047 | 5 IPI00302592 | 36,6 | 36,6 FGGEHVPNSPFQVTALAGDQPSVQPPLR        | 28 | 982,50  | 2944,4829 |
| 16536 | 5 IPI00302592 | 49,2 | 49,2 EEGPYEVEVTYDGVVPVPGSPFPLEAVAPT KPSK | 33 | 1162,58 | 3484,7295 |
| 10497 | 6 IPI00003865 | 62,5 | 62,5 DAGTIAGLNVL R                       | 12 | 600,34  | 1198,6646 |
| 5280  | 6 IPI00003865 | 76   | 76 SQIHDIVLVGGSTR                        | 14 | 741,41  | 1480,798  |
| 6693  | 6 IPI00003865 | 72,1 | 72,1 TTPSYVAFTDTER                       | 13 | 744,35  | 1486,691  |
| 13207 | 6 IPI00003865 | 29,4 | 29,4 SFYPEEVSSMVLTK                      | 14 | 808,90  | 1615,7784 |
| 10697 | 6 IPI00003865 | 70,6 | 70,6 SFYPEEVSS(M)V LTK                   | 14 | 816,89  | 1631,7742 |
| 7208  | 6 IPI00003865 | 57,9 | 57,9 NQVAMNPTNTV FDAK                    | 15 | 825,40  | 1648,7863 |
| 11532 | 6 IPI00003865 | 99,7 | 99,7 IINEPTAAAIAYGLDK                    | 16 | 830,45  | 1658,8859 |
| 4950  | 6 IPI00003865 | 85,2 | 85,2 NQVA(M)NPTNTV FDAK                  | 15 | 833,40  | 1664,7808 |
| 11187 | 6 IPI00003865 | 36   | 36 TVTNAVVTVPAYFNDSQR                    | 18 | 991,50  | 1980,9904 |
| 12667 | 6 IPI00003865 | 35,8 | 35,8 GPAVGIDLGT TYSCVGVFQH GK            | 22 | 755,04  | 2262,1023 |
| 14387 | 6 IPI00003865 | 32,4 | 32,4 QTQTFTTYSDNQP GVLIQVYEGER           | 24 | 925,45  | 2773,3191 |
| 9854  | 7 IPI00011654 | 40,5 | 40,5 YLTVA AVFR                          | 9  | 520,30  | 1038,5846 |
| 6483  | 7 IPI00011654 | 45,6 | 45,6 FPGQLNADLR                          | 10 | 565,80  | 1129,5863 |
| 7033  | 7 IPI00011654 | 48,3 | 48,3 ISEQFTA(M)FR                        | 10 | 623,30  | 1244,5842 |
| 4136  | 7 IPI00011654 | 65,7 | 65,7 ISVYYNEATGGK                        | 12 | 651,32  | 1300,6277 |
| 6500  | 7 IPI00011654 | 37,3 | 37,3 I(M)NTFSVVPSPK                      | 12 | 668,35  | 1334,689  |
| 9946  | 7 IPI00011654 | 41,3 | 41,3 AILVDLEPGT(M)DSVR                   | 15 | 816,42  | 1630,8224 |
| 14617 | 7 IPI00011654 | 58,6 | 58,6 ALTVPELTQQV FDAK                    | 15 | 830,45  | 1658,8879 |
| 13777 | 7 IPI00011654 | 49,8 | 49,8 NSSYFVEWIPNNVK                      | 14 | 848,92  | 1695,8247 |
| 16531 | 7 IPI00011654 | 46,5 | 46,5 (M)AVTFIGNSTAIQELFK                 | 17 | 943,49  | 1884,9646 |
| 16345 | 7 IPI00011654 | 72,1 | 72,1 GHYTEGAELVDSVLDVVR                  | 18 | 653,66  | 1957,9727 |
| 15730 | 7 IPI00011654 | 64,5 | 64,5 LTTPTYGDLNHLVSAT(M)SGVTTCLR         | 25 | 908,78  | 2723,3269 |

|       |                |      |                                   |    |        |           |
|-------|----------------|------|-----------------------------------|----|--------|-----------|
| 6393  | 8 IPI00472102  | 36,7 | 36,7 IGIEIHK                      | 7  | 393,26 | 784,5044  |
| 4588  | 8 IPI00472102  | 69,7 | 69,7 VGLQVVAVK                    | 9  | 456,80 | 911,5793  |
| 4406  | 8 IPI00472102  | 49,4 | 49,4 NAGVEGSLIVEK                 | 12 | 608,33 | 1214,6492 |
| 6888  | 8 IPI00472102  | 61,6 | 61,6 TVIIQSWGSPK                  | 12 | 672,86 | 1343,7065 |
| 12454 | 8 IPI00472102  | 73,3 | 73,3 AAVEEGIVLGGGCALLR            | 17 | 842,95 | 1683,895  |
| 13577 | 8 IPI00472102  | 54,4 | 54,4 ISSIQSIVPALEIANAHR           | 18 | 640,36 | 1918,0614 |
| 17781 | 8 IPI00472102  | 69,4 | 69,4 AL(M)LQGVDLLADAVAVTMGPK      | 21 | 710,38 | 2128,1206 |
| 17324 | 8 IPI00472102  | 51,6 | 51,6 AL(M)LQGVDLLADAVAVT(M)GPK    | 21 | 715,71 | 2144,114  |
| 8043  | 8 IPI00472102  | 49,1 | 49,1 LVQDVANNTNEEAGDGTATTATVLAR   | 25 | 854,09 | 2559,2397 |
| 18324 | 8 IPI00472102  | 43,9 | 43,9 TALLDAAGVASLLTTAEVVVTEIPKEEK | 28 | 956,86 | 2867,562  |
| 5978  | 9 IPI00003362  | 40,9 | 40,9 DAGTIAGLNV(M)R               | 12 | 617,32 | 1232,6169 |
| 8718  | 9 IPI00003362  | 50,3 | 50,3 NELESYAYSLK                  | 11 | 658,82 | 1315,6281 |
| 11107 | 9 IPI00003362  | 69,6 | 69,6 ELEEIVQPIISK                 | 12 | 699,40 | 1396,7805 |
| 5263  | 9 IPI00003362  | 48,5 | 48,5 TWNDPSVQQDIK                 | 12 | 715,85 | 1429,6824 |
| 8298  | 9 IPI00003362  | 70,1 | 70,1 ITPSYVAFTPEGER               | 14 | 783,89 | 1565,7716 |
| 6743  | 9 IPI00003362  | 92,1 | 92,1 NQLTSNPENTVFDK               | 15 | 839,41 | 1676,8003 |
| 7933  | 9 IPI00003362  | 75   | 75 SQIFSTASDNQPTVTIK              | 17 | 918,97 | 1835,9249 |
| 8018  | 9 IPI00003362  | 40,8 | 40,8 VTHAVVTVPAYFNDAQR            | 17 | 629,99 | 1886,9625 |
| 8598  | 10 IPI00453473 | 64,3 | 64,3 VFLENVIR                     | 8  | 495,29 | 988,569   |
| 5543  | 10 IPI00453473 | 67,8 | 67,8 ISGLIYEETR                   | 10 | 590,81 | 1179,6116 |
| 13227 | 10 IPI00453473 | 84,5 | 84,5 TVTAMDVVYALK                 | 12 | 655,85 | 1309,6935 |
| 9994  | 10 IPI00453473 | 90,4 | 90,4 TVTA(M)DVVYALK               | 12 | 663,85 | 1325,6869 |
| 10352 | 11 IPI00334775 | 33,7 | 33,7 APFDLFENK                    | 9  | 540,77 | 1079,5273 |
| 4528  | 11 IPI00334775 | 53,6 | 53,6 SIYYITGESK                   | 10 | 580,79 | 1159,5742 |
| 6855  | 11 IPI00334775 | 31,7 | 31,7 IDIIPNPQER                   | 10 | 597,83 | 1193,6387 |
| 8580  | 11 IPI00334775 | 39,1 | 39,1 RAPFDLFENK                   | 10 | 618,82 | 1235,6282 |
| 9514  | 11 IPI00334775 | 77,1 | 77,1 ADLNNLGTIAK                  | 12 | 621,86 | 1241,6962 |
| 10269 | 11 IPI00334775 | 47,6 | 47,6 TLTIVDTGIGMTK                | 13 | 675,37 | 1348,7258 |
| 10269 | 11 IPI00334775 | 47,6 | 47,6 TLTLVDTGIGMTK                | 13 | 675,37 | 1348,7258 |
| 7928  | 11 IPI00334775 | 88,1 | 88,1 TLTIVDTGIG(M)TK              | 13 | 683,37 | 1364,72   |

|       |    |             |      |      |                          |    |         |           |
|-------|----|-------------|------|------|--------------------------|----|---------|-----------|
| 7928  | 11 | IPI00334775 | 88,1 | 88,1 | TLTLVDTGIG(M)TK          | 13 | 683,37  | 1364,72   |
| 10762 | 11 | IPI00334775 | 60,5 | 60,5 | GVVDEDLPLNISR            | 14 | 757,40  | 1512,7772 |
| 7510  | 11 | IPI00334775 | 46,5 | 46,5 | HLEINPDHPIVETLR          | 15 | 594,99  | 1781,9399 |
| 13827 | 11 | IPI00334775 | 59,7 | 59,7 | HSQFIGYPITLYLEK          | 15 | 904,98  | 1807,951  |
| 8413  | 11 | IPI00334775 | 52,7 | 52,7 | YHTSQSGDEMTSLSEYVSR      | 19 | 726,32  | 2175,9353 |
| 5423  | 11 | IPI00334775 | 34,9 | 34,9 | YHTSQSGDE(M)TSLSEYVSR    | 19 | 731,65  | 2191,928  |
| 13347 | 13 | IPI00387144 | 57,4 | 57,4 | EIIDLVLDLDR              | 9  | 543,31  | 1084,6113 |
| 14262 | 13 | IPI00387144 | 71,8 | 71,8 | SIQFVDWCPTGFK            | 13 | 792,88  | 1583,7427 |
| 15177 | 13 | IPI00387144 | 88,1 | 88,1 | AVFVDLEPTVIDEVR          | 15 | 851,46  | 1700,8972 |
| 6835  | 13 | IPI00387144 | 34,2 | 34,2 | NLDIERPTYTNLNR           | 14 | 859,94  | 1717,8704 |
| 12419 | 13 | IPI00387144 | 49,1 | 49,1 | IHFPLATYAPVISA EK        | 16 | 878,99  | 1755,9557 |
| 10757 | 13 | IPI00387144 | 37,9 | 37,9 | VGINYQPPTVVPGGDLAK       | 18 | 913,00  | 1823,9774 |
| 13597 | 13 | IPI00387144 | 82,8 | 82,8 | TIGGGDDSFNTFFSETGAGK     | 20 | 1004,45 | 2006,8839 |
| 10547 | 14 | IPI00021428 | 30   | 30   | YPIEHGIITNWDDMEK         | 16 | 654,31  | 1959,9008 |
| 7913  | 15 | IPI00418169 | 69,3 | 69,3 | DALNIETAIK               | 10 | 544,30  | 1086,5905 |
| 8098  | 15 | IPI00418169 | 78,1 | 78,1 | SLYYYYIQQDTK             | 11 | 711,35  | 1420,6849 |
| 9686  | 15 | IPI00418169 | 46,7 | 46,7 | SYSPYD(M)LESIR           | 12 | 738,84  | 1475,6591 |
| 16160 | 15 | IPI00418169 | 56,5 | 56,5 | GVDEVTIVNILTNR           | 14 | 514,95  | 1541,8401 |
| 17004 | 15 | IPI00418169 | 33,3 | 33,3 | SALSGHLETVILGLLK         | 16 | 551,00  | 1649,9678 |
| 16491 | 15 | IPI00418169 | 62,8 | 62,8 | GLGTDEDSLIEIICSR         | 16 | 889,43  | 1776,8546 |
| 17694 | 15 | IPI00418169 | 48   | 48   | GDLENAFLNLVQCIQNK        | 17 | 988,50  | 1974,9764 |
| 17844 | 15 | IPI00418169 | 68   | 68   | GDLENAFLNLVQCIQNKPLYFADR | 24 | 946,81  | 2837,4063 |
| 14407 | 16 | IPI00180675 | 70,7 | 70,7 | TIQFVDWCPTGFK            | 13 | 799,89  | 1597,7588 |
| 5508  | 17 | IPI00396485 | 44,9 | 44,9 | LPLQDVYK                 | 8  | 488,28  | 974,5417  |
| 4795  | 17 | IPI00396485 | 47,6 | 47,6 | IGGIGTVPVGR              | 11 | 513,31  | 1024,601  |
| 7478  | 17 | IPI00396485 | 42,1 | 42,1 | SGDAAIVDMVPGK            | 13 | 630,32  | 1258,6215 |
| 4151  | 17 | IPI00396485 | 43,3 | 43,3 | SGDAAIVD(M)VPGK          | 13 | 638,32  | 1274,6154 |
| 7998  | 17 | IPI00396485 | 32,3 | 32,3 | EHALLAYTLGVK             | 12 | 657,87  | 1313,7325 |
| 6498  | 17 | IPI00396485 | 73,7 | 73,7 | YYVTIIDAPGHR             | 12 | 702,87  | 1403,7174 |
| 9746  | 17 | IPI00396485 | 64,5 | 64,5 | P(M)CVESFSDYPPLGR        | 15 | 885,89  | 1769,7737 |

|       |    |             |      |      |                                  |    |         |           |
|-------|----|-------------|------|------|----------------------------------|----|---------|-----------|
| 17304 | 17 | IPI00396485 | 32,7 | 32,7 | DGNASGTTLLEALDCILPPTRPTDK        | 25 | 885,78  | 2654,3125 |
| 4206  | 18 | IPI00007752 | 43,2 | 43,2 | INVYYNEATGGK                     | 12 | 664,83  | 1327,6385 |
| 15737 | 18 | IPI00007752 | 36,2 | 36,2 | (M)SATFIGNSTAIQELFK              | 17 | 937,47  | 1872,9276 |
| 9096  | 19 | IPI00007765 | 44,5 | 44,5 | DAGQISGLNVLR                     | 12 | 621,84  | 1241,6711 |
| 7733  | 19 | IPI00007765 | 88,7 | 88,7 | VQQTVDLDFGR                      | 11 | 645,84  | 1289,6708 |
| 14412 | 19 | IPI00007765 | 83,5 | 83,5 | AQFEGIVTDLIR                     | 12 | 681,37  | 1360,7334 |
| 6713  | 19 | IPI00007765 | 58,5 | 58,5 | TTPSVVAFTADGER                   | 14 | 725,86  | 1449,7074 |
| 3752  | 19 | IPI00007765 | 31,3 | 31,3 | QAVTNPNTFYATK                    | 14 | 784,89  | 1567,7618 |
| 15817 | 19 | IPI00007765 | 30   | 30   | LLGQFTLIGIPPAPR                  | 15 | 796,98  | 1591,9438 |
| 11137 | 19 | IPI00007765 | 99,2 | 99,2 | VINEPTAAALAYGLDK                 | 16 | 823,44  | 1644,8712 |
| 10747 | 19 | IPI00007765 | 38,6 | 38,6 | NAVITVPAYFNDSQR                  | 15 | 847,93  | 1693,8417 |
| 10879 | 21 | IPI00382470 | 33,1 | 33,1 | APFDLFENR                        | 9  | 554,77  | 1107,5337 |
| 15402 | 21 | IPI00382470 | 46,9 | 46,9 | HGLEVIY(M)IEPIDEYCVQQLK          | 21 | 865,09  | 2592,2593 |
| 6815  | 22 | IPI00303476 | 48   | 48   | IGLFGGAGVGK                      | 11 | 488,28  | 974,5528  |
| 9026  | 22 | IPI00303476 | 37,3 | 37,3 | VVDLLAPYAK                       | 10 | 544,82  | 1087,6267 |
| 6165  | 22 | IPI00303476 | 49,8 | 49,8 | I(M)NVIGEPIDER                   | 12 | 701,35  | 1400,6952 |
| 10607 | 22 | IPI00303476 | 81,3 | 81,3 | FTQAGSEVSALLGR                   | 14 | 718,38  | 1434,7444 |
| 14724 | 22 | IPI00303476 | 80,1 | 80,1 | VALTGLTVAEYFR                    | 13 | 720,40  | 1438,7814 |
| 15384 | 22 | IPI00303476 | 75,1 | 75,1 | TVLI(M)ELINNVAK                  | 13 | 737,42  | 1472,8268 |
| 15084 | 22 | IPI00303476 | 30,4 | 30,4 | AIAELGIYPAVDPLDSTSR              | 19 | 994,52  | 1987,0254 |
| 15474 | 22 | IPI00303476 | 38,1 | 38,1 | EGNDLYHEMIESGVINLK               | 18 | 687,67  | 2059,9849 |
| 17086 | 22 | IPI00303476 | 30,2 | 30,2 | GFQQILAGEYDHLPEQAFY(M)VGPIEEAVAK | 30 | 1122,88 | 3365,6262 |
| 6905  | 23 | IPI00215965 | 62,1 | 62,1 | IEVIEI(M)TDR                     | 10 | 617,82  | 1233,6259 |
| 3995  | 23 | IPI00215965 | 48,6 | 48,6 | SSGPYGGGGQYFAK                   | 14 | 688,32  | 1374,6187 |
| 11057 | 23 | IPI00215965 | 53,9 | 53,9 | GFAFVTFDDHDSVDK                  | 15 | 850,38  | 1698,7535 |
| 15715 | 23 | IPI00215965 | 80,2 | 80,2 | LFIGGLSFETTDESLR                 | 16 | 892,96  | 1783,8994 |
| 12222 | 24 | IPI00304925 | 64,3 | 64,3 | DAGVIAGLNVLR                     | 12 | 599,35  | 1196,6863 |
| 7755  | 24 | IPI00304925 | 50   | 50   | NQVALNPQNTVFDAK                  | 15 | 829,93  | 1657,8418 |
| 12017 | 24 | IPI00304925 | 46,7 | 46,7 | IINEPTAAAIAYGLDR                 | 16 | 844,45  | 1686,8929 |
| 13402 | 24 | IPI00304925 | 37,9 | 37,9 | AAAIGIDLGTTYSCVGVFQHGK           | 22 | 755,72  | 2264,1265 |

|       |    |             |      |      |                                  |    |         |           |
|-------|----|-------------|------|------|----------------------------------|----|---------|-----------|
| 16240 | 24 | IPI00304925 | 44,2 | 44,2 | ELEQVCNPIISGLYQGAGGPGPGGFGAQQGPK | 31 | 1019,17 | 3054,4832 |
| 10144 | 25 | IPI00021405 | 31,3 | 31,3 | DLEALLNSK                        | 9  | 501,78  | 1001,5389 |
| 3690  | 25 | IPI00021405 | 32,7 | 32,7 | NIYSEELR                         | 8  | 512,26  | 1022,5017 |
| 5398  | 25 | IPI00021405 | 35,2 | 35,2 | TLEGELHDLR                       | 10 | 591,81  | 1181,6027 |
| 9624  | 25 | IPI00021405 | 49,7 | 49,7 | IDSLSAQLSQLQK                    | 13 | 715,90  | 1429,777  |
| 6225  | 25 | IPI00021405 | 44,8 | 44,8 | TALINSTGEEVAMR                   | 14 | 746,38  | 1490,7369 |
| 4408  | 25 | IPI00021405 | 55,5 | 55,5 | TALINSTGEEVA(M)R                 | 14 | 754,37  | 1506,731  |
| 3335  | 25 | IPI00021405 | 53,7 | 53,7 | SNEDQS(M)GNWQIK                  | 13 | 776,84  | 1551,6602 |
| 5783  | 25 | IPI00021405 | 88,9 | 88,9 | SVGGSGGGSFGDNLVTR                | 17 | 783,88  | 1565,7416 |
| 14562 | 25 | IPI00021405 | 53,3 | 53,3 | AGQVVTIWAAGAGATHSPPTDLVWK        | 25 | 845,11  | 2532,3118 |
| 5723  | 27 | IPI00440493 | 39,9 | 39,9 | VLSIGDGIAR                       | 10 | 500,79  | 999,5695  |
| 6680  | 27 | IPI00440493 | 43,7 | 43,7 | AVDSLVPIGR                       | 10 | 513,80  | 1025,5851 |
| 7013  | 27 | IPI00440493 | 64,5 | 64,5 | HALIYDDLK                        | 11 | 644,35  | 1286,6853 |
| 9449  | 27 | IPI00440493 | 51,5 | 51,5 | TSIAIDTIINQK                     | 12 | 658,87  | 1315,7323 |
| 7760  | 27 | IPI00440493 | 93,6 | 93,6 | TGTAEMSSILEER                    | 13 | 712,34  | 1422,6642 |
| 3645  | 27 | IPI00440493 | 81,7 | 81,7 | TGTAE(M)SSILEER                  | 13 | 720,34  | 1438,66   |
| 13872 | 27 | IPI00440493 | 79,3 | 79,3 | TGAIVDVPVGEELLGR                 | 16 | 812,95  | 1623,882  |
| 4613  | 29 | IPI00291006 | 35,8 | 35,8 | ANTFVAELK                        | 9  | 496,77  | 991,5322  |
| 13607 | 29 | IPI00291006 | 69,9 | 69,9 | IFGVTTLDIVR                      | 11 | 617,36  | 1232,7112 |
| 8625  | 29 | IPI00291006 | 68,7 | 68,7 | GCDVVVIPAGVPR                    | 13 | 669,86  | 1337,7109 |
| 3827  | 29 | IPI00291006 | 69,3 | 69,3 | AGAGSATLS(M)AYAGAR               | 16 | 735,85  | 1469,691  |
| 16811 | 29 | IPI00291006 | 93,9 | 93,9 | VAVLGASGGIGQPLSLLK               | 19 | 897,05  | 1792,0806 |
| 13702 | 29 | IPI00291006 | 67,3 | 67,3 | SQETECTYFSTPLLLGK                | 17 | 987,48  | 1972,9449 |
| 2880  | 30 | IPI00013508 | 41,2 | 41,2 | I(M)SIVDPNR                      | 9  | 530,78  | 1059,5372 |
| 10837 | 30 | IPI00013508 | 35   | 35   | EGLLLWCQR                        | 9  | 587,80  | 1173,5946 |
| 15915 | 30 | IPI00013508 | 46,1 | 46,1 | LASDLLEWIR                       | 10 | 608,34  | 1214,6655 |
| 2615  | 30 | IPI00013508 | 46,3 | 46,3 | GISQEQ(M)NEFR                    | 11 | 677,81  | 1353,5962 |
| 16773 | 30 | IPI00013508 | 72,5 | 72,5 | VGWEQLLTTIAR                     | 12 | 693,89  | 1385,7646 |
| 15960 | 30 | IPI00013508 | 60,5 | 60,5 | GYEEWLLNEIR                      | 11 | 711,36  | 1420,6976 |
| 8375  | 30 | IPI00013508 | 55,1 | 55,1 | TINEVENQILTR                     | 12 | 715,38  | 1428,7545 |



|       |    |             |      |      |                            |    |         |           |
|-------|----|-------------|------|------|----------------------------|----|---------|-----------|
| 9794  | 30 | IPI00013508 | 61   | 61   | FAIQDISVEETSAK             | 14 | 769,39  | 1536,7664 |
| 11277 | 30 | IPI00013508 | 73,8 | 73,8 | ICDQWDNLGALTQK             | 14 | 831,40  | 1660,788  |
| 15522 | 30 | IPI00013508 | 31,3 | 31,3 | IDQLEGDHQLIQEALIFDNK       | 20 | 780,40  | 2338,1777 |
| 9656  | 34 | IPI00411633 | 39,3 | 39,3 | SLIINTFYNSNK               | 11 | 650,35  | 1298,6855 |
| 3075  | 35 | IPI00419585 | 45,3 | 45,3 | TEWLDGK                    | 7  | 424,71  | 847,4061  |
| 10542 | 35 | IPI00419585 | 70,7 | 70,7 | VSFELFADK                  | 9  | 528,27  | 1054,5319 |
| 5090  | 35 | IPI00419585 | 57,4 | 57,4 | KITIADCGQLE                | 11 | 624,32  | 1246,6212 |
| 9404  | 35 | IPI00419585 | 30,8 | 30,8 | EGMNIVEAMER                | 11 | 639,79  | 1277,573  |
| 4193  | 35 | IPI00419585 | 29,6 | 29,6 | EGMNIVEA(M)ER              | 11 | 647,79  | 1293,5669 |
| 5888  | 35 | IPI00419585 | 36,4 | 36,4 | EG(M)NIVEAMER              | 11 | 647,79  | 1293,5684 |
| 2066  | 35 | IPI00419585 | 37,2 | 37,2 | EG(M)NIVEA(M)ER            | 11 | 655,79  | 1309,5627 |
| 17046 | 35 | IPI00419585 | 56,1 | 56,1 | VNPTVFFDIAVDGEPLGR         | 18 | 973,50  | 1944,9913 |
| 6750  | 36 | IPI00013808 | 30,8 | 30,8 | NFITAEELR                  | 9  | 546,79  | 1091,5591 |
| 2610  | 36 | IPI00013808 | 36   | 36   | GISQEQ(M)QEFR              | 11 | 684,81  | 1367,6125 |
| 16633 | 36 | IPI00013808 | 59,1 | 59,1 | VEQIAAIAQELNELDYYDSHNVNTR  | 25 | 969,14  | 2904,3894 |
| 4211  | 37 | IPI00396378 | 33,5 | 33,5 | NYEQWGK                    | 8  | 544,25  | 1086,4756 |
| 3935  | 37 | IPI00396378 | 37,8 | 37,8 | GGGGNFGPGPGSNFR            | 15 | 689,32  | 1376,62   |
| 11592 | 37 | IPI00396378 | 56,5 | 56,5 | GFGFVTFDDHDPVDK            | 15 | 848,39  | 1694,7559 |
| 15790 | 37 | IPI00396378 | 99,6 | 99,6 | LFIGGLSFETTEESLR           | 16 | 899,96  | 1797,9149 |
| 3945  | 37 | IPI00396378 | 63,5 | 63,5 | N(M)GGPYGGNYGPGGSGGSGGYGGR | 25 | 1103,45 | 2204,8892 |
| 4455  | 39 | IPI00465430 | 35,3 | 35,3 | PLVLLK                     | 6  | 341,75  | 681,4776  |
| 8946  | 39 | IPI00465430 | 40,6 | 40,6 | ILELDQFK                   | 8  | 503,28  | 1004,5525 |
| 8113  | 39 | IPI00465430 | 64,7 | 64,7 | LGSLVDEFK                  | 9  | 504,27  | 1006,5319 |
| 5135  | 39 | IPI00465430 | 76,3 | 76,3 | KQELLEALTK                 | 10 | 586,85  | 1171,6792 |
| 11444 | 39 | IPI00465430 | 67,6 | 67,6 | NIYVLQELDNPGAK             | 14 | 787,41  | 1572,8135 |
| 9484  | 39 | IPI00465430 | 60,2 | 60,2 | TFNTSTGGLLLPSDTK           | 16 | 826,43  | 1650,8461 |
| 17616 | 39 | IPI00465430 | 29,1 | 29,1 | IQVTPPGFQLVFLPFADDK        | 19 | 1066,57 | 2131,1267 |
| 2097  | 40 | IPI00179330 | 39,3 | 39,3 | (M)QIFVK                   | 6  | 391,22  | 780,4196  |
| 4805  | 40 | IPI00179330 | 79,8 | 79,8 | ESTLHLVLR                  | 9  | 534,31  | 1066,6113 |
| 10622 | 40 | IPI00179330 | 71,8 | 71,8 | TITLEVEPSDTIENVK           | 16 | 894,47  | 1786,9182 |

|       |    |             |      |      |                               |    |         |           |
|-------|----|-------------|------|------|-------------------------------|----|---------|-----------|
| 13534 | 41 | IPI00465028 | 59,5 | 59,5 | QSLGELIGTLNAAK                | 14 | 707,90  | 1413,7815 |
| 5348  | 41 | IPI00465028 | 48,1 | 48,1 | HVFGESDELIGQK                 | 13 | 729,86  | 1457,7152 |
| 7378  | 41 | IPI00465028 | 70,5 | 70,5 | DCGATWVVLGHSER                | 14 | 793,87  | 1585,7299 |
| 14212 | 41 | IPI00465028 | 81,4 | 81,4 | VVLAYEPVWAIGTGK               | 15 | 801,95  | 1601,8806 |
| 17074 | 41 | IPI00465028 | 48,9 | 48,9 | ELASQPDVDGFLVGGASLKPEFVDIINAK | 29 | 1010,53 | 3028,5713 |
| 8886  | 42 | IPI00219018 | 85   | 85   | VPTANVSVVDLTCR                | 14 | 765,90  | 1529,7863 |
| 14512 | 42 | IPI00219018 | 53,5 | 53,5 | LVINGNPITIFQER                | 14 | 807,45  | 1612,8932 |
| 12892 | 42 | IPI00219018 | 74,4 | 74,4 | LISWYDNEFGYSNR                | 14 | 882,40  | 1762,7935 |
| 7925  | 43 | IPI00007188 | 49,5 | 49,5 | AAYFGIYDTAK                   | 11 | 610,30  | 1218,5909 |
| 11674 | 43 | IPI00007188 | 97,6 | 97,6 | DFLAGGVAAAISK                 | 13 | 610,34  | 1218,6598 |
| 14834 | 43 | IPI00007188 | 43,1 | 43,1 | YFPTQALNFAFK                  | 12 | 723,87  | 1445,7334 |
| 10334 | 43 | IPI00007188 | 54,3 | 54,3 | GTDI(M)YTGTLDCWR              | 14 | 852,87  | 1703,7295 |
| 4416  | 45 | IPI00186290 | 34,5 | 34,5 | FSVSPVVR                      | 8  | 445,76  | 889,5009  |
| 5063  | 45 | IPI00186290 | 45,8 | 45,8 | GVQYLNEIK                     | 9  | 532,29  | 1062,5691 |
| 6403  | 45 | IPI00186290 | 47,8 | 47,8 | VNFTVDQIR                     | 9  | 546,29  | 1090,5752 |
| 8068  | 45 | IPI00186290 | 30,4 | 30,4 | VFDAI(M)NFK                   | 9  | 550,78  | 1099,5356 |
| 7558  | 45 | IPI00186290 | 41   | 41   | VFSGLVSTGLK                   | 11 | 554,32  | 1106,6322 |
| 16723 | 45 | IPI00186290 | 86,5 | 86,5 | TFCQLILDPIFK                  | 12 | 747,90  | 1493,7937 |
| 7270  | 45 | IPI00186290 | 83,9 | 83,9 | ETVSEESNVLCLSK                | 14 | 797,88  | 1593,754  |
| 16904 | 45 | IPI00186290 | 40,5 | 40,5 | IWCFGPDGTGPNILTDITK           | 19 | 1053,02 | 2104,0303 |
| 17194 | 45 | IPI00186290 | 45,4 | 45,4 | ALLELQLEPEELYQTFQR            | 18 | 740,72  | 2219,1416 |
| 3400  | 46 | IPI00218918 | 47,4 | 47,4 | PAFFAEK                       | 7  | 405,21  | 808,4103  |
| 5468  | 46 | IPI00218918 | 75,8 | 75,8 | TPAQFDADELRL                  | 11 | 631,80  | 1261,5923 |
| 14042 | 46 | IPI00218918 | 60,6 | 60,6 | GTDVNVFNTILTTR                | 14 | 775,91  | 1549,8083 |
| 14014 | 46 | IPI00218918 | 50,5 | 50,5 | (M)YGISLCQAILDETK             | 15 | 879,43  | 1756,8372 |
| 4248  | 47 | IPI00217966 | 42,6 | 42,6 | LVIITAGAR                     | 9  | 457,29  | 912,5741  |
| 6430  | 47 | IPI00217966 | 60,5 | 60,5 | SADTLWGIQK                    | 10 | 559,79  | 1117,5751 |
| 12957 | 47 | IPI00217966 | 53   | 53   | DQLIYNLLK                     | 9  | 560,32  | 1118,6327 |
| 6468  | 47 | IPI00217966 | 43,1 | 43,1 | QVVESAYEVIK                   | 11 | 632,84  | 1263,6691 |
| 17794 | 47 | IPI00217966 | 45,2 | 45,2 | LLIVSNPVDILTIVAWK             | 17 | 648,71  | 1943,1064 |

|       |    |             |      |      |                    |    |        |           |
|-------|----|-------------|------|------|--------------------|----|--------|-----------|
| 11584 | 48 | IPI00299571 | 61,2 | 61,2 | NSYLEVLLK          | 9  | 539,81 | 1077,6053 |
| 16498 | 48 | IPI00299571 | 61,5 | 61,5 | TGEAIVDAALSALR     | 14 | 693,88 | 1385,7498 |
| 12097 | 48 | IPI00299571 | 72,8 | 72,8 | LAAVDATVNQVLASR    | 15 | 764,43 | 1526,8408 |
| 8888  | 48 | IPI00299571 | 75,2 | 75,2 | GSTAPVGGGAFPTIVER  | 17 | 808,43 | 1614,8361 |
| 3265  | 49 | IPI00303882 | 79,3 | 79,3 | SVVTGGVQSV(M)GSR   | 14 | 690,35 | 1378,6847 |
| 7880  | 49 | IPI00303882 | 67,9 | 67,9 | TLTAAAVSGAQPILSK   | 16 | 764,44 | 1526,8651 |
| 11737 | 49 | IPI00303882 | 38,2 | 38,2 | LGQ(M)VLSGVDTVLGK  | 15 | 766,92 | 1531,8267 |
| 9634  | 49 | IPI00303882 | 63,3 | 63,3 | LEENLPILQQPTEK     | 14 | 826,45 | 1650,8824 |
| 11012 | 49 | IPI00303882 | 46,1 | 46,1 | IATSLDGFVDVASVQQQR | 17 | 917,97 | 1833,9211 |
| 5855  | 51 | IPI00012011 | 57,6 | 57,6 | LGGSAVISLEGK       | 12 | 565,82 | 1129,6338 |
| 8218  | 51 | IPI00012011 | 39,4 | 39,4 | AVLFCLSEDK         | 10 | 591,30 | 1180,5769 |
| 5445  | 51 | IPI00012011 | 29,7 | 29,7 | AVLFCLSEDKK        | 11 | 655,34 | 1308,6721 |
| 6173  | 51 | IPI00012011 | 66,3 | 66,3 | YALYDATYETK        | 11 | 669,32 | 1336,6183 |
| 9869  | 51 | IPI00012011 | 37,7 | 37,7 | LGGSAVISLEGKPL     | 14 | 670,89 | 1339,7699 |
| 16746 | 51 | IPI00012011 | 32,5 | 32,5 | KEDLVFIFWAPESAPLK  | 17 | 664,03 | 1989,0597 |
| 5678  | 52 | IPI00329801 | 52,4 | 52,4 | VLTEIIASR          | 9  | 501,30 | 1000,5903 |
| 11812 | 52 | IPI00329801 | 48,5 | 48,5 | SEIDLFNIR          | 9  | 553,79 | 1105,5752 |
| 17334 | 52 | IPI00329801 | 47,6 | 47,6 | ETSGNLEQLLLAVVK    | 15 | 538,64 | 1612,8979 |
| 17154 | 52 | IPI00329801 | 81,3 | 81,3 | GLGTDEESILTLLTSR   | 16 | 852,95 | 1703,887  |
| 3832  | 53 | IPI00215719 | 49,4 | 49,4 | GCGTVLLSGPR        | 11 | 558,80 | 1115,5754 |
| 4708  | 53 | IPI00215719 | 53,7 | 53,7 | TNSTFNQVVVK        | 11 | 625,84 | 1249,6658 |
| 7223  | 53 | IPI00215719 | 82,3 | 82,3 | TAVVVGTTITDDVR     | 13 | 673,37 | 1344,7236 |
| 13364 | 53 | IPI00215719 | 65,2 | 65,2 | ILTFDQLALDSPK      | 13 | 730,90 | 1459,7906 |
| 7798  | 54 | IPI00216691 | 54,2 | 54,2 | DSPSVWAAVPGK       | 12 | 607,31 | 1212,613  |
| 5413  | 54 | IPI00216691 | 46,2 | 46,2 | STGGAPTFNVTVTK     | 14 | 690,36 | 1378,7061 |
| 15312 | 54 | IPI00216691 | 81,4 | 81,4 | TFVNITPAEVGVLVGK   | 16 | 822,47 | 1642,9286 |
| 7743  | 55 | IPI00169383 | 29,5 | 29,5 | DVLFLK             | 6  | 367,73 | 733,4362  |
| 3910  | 55 | IPI00169383 | 38,6 | 38,6 | VDFNVP(M)K         | 8  | 483,24 | 964,4674  |
| 13042 | 55 | IPI00169383 | 37,2 | 37,2 | ITLPVDFVTADK       | 12 | 659,87 | 1317,7172 |
| 5720  | 55 | IPI00169383 | 46,9 | 46,9 | GCITHGGGDTATCCA    | 17 | 877,90 | 1753,7773 |

|       |    |             |      |      |                    |    |        |           |
|-------|----|-------------|------|------|--------------------|----|--------|-----------|
| 13892 | 55 | IPI00169383 | 91,9 | 91,9 | ACANPAAGSVILLENLR  | 17 | 884,97 | 1767,929  |
| 6308  | 56 | IPI00178440 | 55,9 | 55,9 | LQIQCVVEDDK        | 11 | 673,83 | 1345,6536 |
| 7958  | 56 | IPI00178440 | 49,9 | 49,9 | SIQADGLVWGSSK      | 13 | 674,35 | 1346,6805 |
| 14037 | 56 | IPI00178440 | 99,9 | 99,9 | SPAGLQVLNDYLADK    | 15 | 802,42 | 1602,8239 |
| 13302 | 58 | IPI00028888 | 42,5 | 42,5 | GFGFVLFK           | 8  | 457,76 | 913,505   |
| 11742 | 58 | IPI00028888 | 40,2 | 40,2 | GFCFITFK           | 8  | 510,25 | 1018,4929 |
| 7723  | 58 | IPI00028888 | 75,6 | 75,6 | IFVGGLSPDTPEEK     | 14 | 744,88 | 1487,749  |
| 2860  | 59 | IPI00019502 | 33,1 | 33,1 | ADEWL(M)K          | 7  | 454,71 | 907,4091  |
| 7658  | 59 | IPI00019502 | 34,3 | 34,3 | TDLLEPYNK          | 10 | 603,32 | 1204,6331 |
| 5815  | 59 | IPI00019502 | 62   | 62   | VEAQLQELQVK        | 11 | 642,86 | 1283,7073 |
| 7140  | 59 | IPI00019502 | 29,6 | 29,6 | ADFCIIHYAGK        | 11 | 432,21 | 1293,6154 |
| 11347 | 59 | IPI00019502 | 29,2 | 29,2 | LDPHLVLDQLR        | 11 | 440,25 | 1317,7386 |
| 16428 | 59 | IPI00019502 | 68,5 | 68,5 | VISGVLQLGNIVFK     | 14 | 743,95 | 1485,8906 |
| 13187 | 59 | IPI00019502 | 68,2 | 68,2 | NFINNPLAQADWAAK    | 15 | 836,93 | 1671,8372 |
| 10147 | 59 | IPI00019502 | 32,8 | 32,8 | HSQAVEELAEQLEQTK   | 16 | 613,97 | 1838,8993 |
| 14182 | 60 | IPI00013881 | 92,9 | 92,9 | STGEAFVQFASQEIAEK  | 17 | 921,45 | 1840,8833 |
| 16909 | 60 | IPI00013881 | 69,1 | 69,1 | ATENDIYNFFSPLNPVR  | 17 | 998,99 | 1995,9677 |
| 5943  | 61 | IPI00216592 | 29,3 | 29,3 | SDVEAIFSK          | 9  | 498,26 | 994,4955  |
| 9001  | 61 | IPI00216592 | 64,4 | 64,4 | VDSLLENLEK         | 10 | 580,31 | 1158,6118 |
| 11984 | 61 | IPI00216592 | 30,7 | 30,7 | VFIGNLNTLVVK       | 12 | 658,90 | 1315,7854 |
| 10729 | 61 | IPI00216592 | 75,4 | 75,4 | GFAFVQYVNER        | 11 | 665,33 | 1328,6493 |
| 11652 | 61 | IPI00216592 | 44,6 | 44,6 | (M)IAGQVLDINLAAEPK | 16 | 849,96 | 1697,9017 |
| 8140  | 62 | IPI00291175 | 32,1 | 32,1 | SLLDASEEAIK        | 11 | 588,31 | 1174,6058 |
| 6893  | 62 | IPI00291175 | 83,4 | 83,4 | AQQVSQGLDVLTA      | 14 | 729,40 | 1456,7869 |
| 5995  | 62 | IPI00291175 | 58,2 | 58,2 | LLAVAATAPPDAPNR    | 15 | 738,91 | 1475,8063 |
| 13844 | 62 | IPI00291175 | 36,6 | 36,6 | VLQLTSWDEDWASK     | 15 | 874,93 | 1747,8397 |
| 7508  | 64 | IPI00018534 | 29,4 | 29,4 | LLLPGELAK          | 9  | 477,30 | 952,5939  |
| 5128  | 64 | IPI00018534 | 31,8 | 31,8 | ESYSVYVYK          | 9  | 569,28 | 1136,5371 |
| 3482  | 64 | IPI00018534 | 34,9 | 34,9 | KESYSVYVYK         | 10 | 633,32 | 1264,6316 |
| 16708 | 64 | IPI00018534 | 71,5 | 71,5 | A(M)GIMNSFVNDIFER  | 15 | 880,41 | 1758,8068 |

|       |    |             |      |      |                                |    |         |           |
|-------|----|-------------|------|------|--------------------------------|----|---------|-----------|
| 14027 | 64 | IPI00018534 | 65,8 | 65,8 | A(M)GI(M)NSFVNDIFER            | 15 | 888,41  | 1774,7999 |
| 11852 | 65 | IPI00216308 | 75,8 | 75,8 | LTLSALIDGK                     | 10 | 515,81  | 1029,6053 |
| 11852 | 65 | IPI00216308 | 75,8 | 75,8 | LTLSALLDGK                     | 10 | 515,81  | 1029,6053 |
| 3750  | 65 | IPI00216308 | 60,2 | 60,2 | VTQSNFAVGYK                    | 11 | 607,31  | 1212,6124 |
| 10614 | 65 | IPI00216308 | 49,1 | 49,1 | WTEYGLTFTEK                    | 11 | 687,83  | 1373,6489 |
| 7703  | 65 | IPI00216308 | 72,5 | 72,5 | LTFDSSFSPNTGK                  | 13 | 700,84  | 1399,66   |
| 15277 | 66 | IPI00216049 | 74,8 | 74,8 | IILDLISESPIK                   | 12 | 670,90  | 1339,795  |
| 13122 | 66 | IPI00216049 | 53   | 53   | GSYGDLDGGPIITTQVTIPK           | 19 | 959,02  | 1916,0248 |
| 16511 | 66 | IPI00216049 | 40,8 | 40,8 | IITITGTQDQIQNAQYLLQNSVK        | 23 | 863,80  | 2588,3813 |
| 11847 | 67 | IPI00023048 | 69,1 | 69,1 | GVVQELQQAISK                   | 12 | 650,37  | 1298,718  |
| 5775  | 67 | IPI00023048 | 60,7 | 60,7 | IASLEVENQSLR                   | 12 | 679,87  | 1357,7177 |
| 13002 | 67 | IPI00023048 | 52,4 | 52,4 | SIQLDGLVWGASK                  | 13 | 687,37  | 1372,7338 |
| 16418 | 67 | IPI00023048 | 31   | 31   | LQIQCVVEDDKVGTDLLEEEITK        | 23 | 892,12  | 2673,3384 |
| 4233  | 69 | IPI00003935 | 35,1 | 35,1 | KESYSIYVYK                     | 10 | 640,33  | 1278,6479 |
| 4753  | 70 | IPI00554788 | 39,8 | 39,8 | IVLQIDNAR                      | 9  | 521,31  | 1040,5956 |
| 4236  | 70 | IPI00554788 | 56,3 | 56,3 | LEAEIATYR                      | 9  | 533,28  | 1064,5487 |
| 2525  | 70 | IPI00554788 | 30,1 | 30,1 | VKYETELA(M)R                   | 10 | 419,22  | 1254,6255 |
| 4336  | 70 | IPI00554788 | 98   | 98   | AQIFANTVDNAR                   | 12 | 660,34  | 1318,6616 |
| 9344  | 70 | IPI00554788 | 64,7 | 64,7 | GG(M)GSGGLATGIAGGLAG(M)GGIQNEK | 26 | 765,03  | 2292,0813 |
| 13712 | 71 | IPI00220740 | 54,3 | 54,3 | DELHIVEAEA(M)NYEGSPIK          | 19 | 721,01  | 2160,0034 |
| 16758 | 71 | IPI00220740 | 85,6 | 85,6 | (M)SVQPTVSLGGFEITPPVVL         | 21 | 1122,11 | 2242,2014 |
| 15995 | 72 | IPI00021263 | 42,4 | 42,4 | DSTLIMQLLR                     | 10 | 595,33  | 1188,6521 |
| 14062 | 72 | IPI00021263 | 46,5 | 46,5 | DSTLI(M)QLLR                   | 10 | 603,33  | 1204,6471 |
| 13917 | 72 | IPI00021263 | 78,9 | 78,9 | GIVDQSQQAYQEAFEISK             | 18 | 1021,00 | 2039,9788 |
| 6078  | 73 | IPI00026272 | 54,6 | 54,6 | AGLQFPVGR                      | 9  | 472,77  | 943,5223  |
| 16711 | 73 | IPI00026272 | 60,8 | 60,8 | VTIAQGGVLPNIQAVLLPK            | 19 | 966,09  | 1930,1599 |
| 4052  | 74 | IPI00024067 | 29,3 | 29,3 | HELIEFR                        | 7  | 472,25  | 942,4909  |
| 6175  | 74 | IPI00024067 | 30,7 | 30,7 | HDVVFLITK                      | 9  | 536,31  | 1070,6112 |
| 4378  | 74 | IPI00024067 | 38,9 | 38,9 | EVCFACVDGK                     | 10 | 592,76  | 1183,4987 |
| 9364  | 74 | IPI00024067 | 35,2 | 35,2 | NNLAGAEELFAR                   | 12 | 652,83  | 1303,6501 |

|       |    |             |      |      |                           |    |        |           |
|-------|----|-------------|------|------|---------------------------|----|--------|-----------|
| 15860 | 74 | IPI00024067 | 32,9 | 32,9 | NLQNLLILTAIK              | 12 | 677,43 | 1352,8381 |
| 10329 | 74 | IPI00024067 | 30,9 | 30,9 | ALEHFTDLYDIK              | 12 | 488,92 | 1463,7281 |
| 17151 | 74 | IPI00024067 | 60,6 | 60,6 | VGYPDWIFLLR               | 12 | 740,40 | 1478,7855 |
| 4218  | 74 | IPI00024067 | 63,8 | 63,8 | VIQCFAETGQVQK             | 13 | 754,38 | 1506,7485 |
| 17674 | 74 | IPI00024067 | 30,8 | 30,8 | AF(M)TADLPNELIELLEK       | 17 | 982,01 | 1961,996  |
| 13032 | 74 | IPI00024067 | 32,9 | 32,9 | ISGETIFVTAPHEATAGIIGVNR   | 23 | 785,09 | 2352,2427 |
| 14492 | 75 | IPI00024919 | 44,4 | 44,4 | GLFIIDPNGVIK              | 12 | 643,38 | 1284,7426 |
| 14877 | 75 | IPI00024919 | 68,1 | 68,1 | DYGVLLLEGSGLALR           | 14 | 731,90 | 1461,783  |
| 5383  | 76 | IPI00220642 | 80   | 80   | NVTELNEPLSNEER            | 14 | 822,40 | 1642,7806 |
| 8983  | 77 | IPI00479217 | 53,5 | 53,5 | GYFEYIEENK                | 10 | 646,29 | 1290,5743 |
| 9003  | 77 | IPI00479217 | 91,3 | 91,3 | NFILDQTNVSAQAQR           | 15 | 824,43 | 1646,8374 |
| 16751 | 78 | IPI00018146 | 86,6 | 86,6 | SICTTVLELLDK              | 12 | 696,38 | 1390,736  |
| 6448  | 79 | IPI00010896 | 95,4 | 95,4 | GVTFNVTVDTK               | 12 | 641,34 | 1280,6602 |
| 16377 | 79 | IPI00010896 | 31,5 | 31,5 | IEEFLEAVLCPFR             | 13 | 524,94 | 1571,8002 |
| 13952 | 79 | IPI00010896 | 56,4 | 56,4 | LAALNPESNTAGLDIFAK        | 18 | 922,99 | 1843,9667 |
| 16077 | 79 | IPI00010896 | 33,9 | 33,9 | FLDGNELTLADCNLLPK         | 17 | 966,99 | 1931,9657 |
| 5430  | 81 | IPI00025252 | 49,2 | 49,2 | YGVSGYPTLK                | 10 | 542,79 | 1083,5587 |
| 12054 | 81 | IPI00025252 | 33,2 | 33,2 | FLQDYFDGNLK               | 11 | 680,33 | 1358,6499 |
| 16040 | 81 | IPI00025252 | 65,1 | 65,1 | ELSDFISYLQR               | 11 | 685,85 | 1369,6864 |
| 17404 | 81 | IPI00025252 | 30,5 | 30,5 | DASIVGFFDDSFSEAHSEFLK     | 21 | 783,36 | 2347,0535 |
| 16461 | 81 | IPI00025252 | 43,1 | 43,1 | TFSHELSDFGLESTAGEIPVVAIR  | 24 | 859,11 | 2574,2932 |
| 16566 | 81 | IPI00025252 | 52,5 | 52,5 | FAHTNVESLVNEYDDNGEGHILFR  | 24 | 918,11 | 2751,3152 |
| 8815  | 82 | IPI00002966 | 42,4 | 42,4 | VLATAFDTTLGGR             | 13 | 661,36 | 1320,7017 |
| 7588  | 82 | IPI00002966 | 53,6 | 53,6 | AGGIETIANEYSR             | 14 | 748,35 | 1494,6926 |
| 11219 | 82 | IPI00002966 | 37,5 | 37,5 | GCALQCAILSPAFK            | 14 | 768,39 | 1534,7649 |
| 17064 | 82 | IPI00002966 | 45,5 | 45,5 | EFSDTDVVPYISLR            | 15 | 868,47 | 1734,9178 |
| 16656 | 82 | IPI00002966 | 59   | 59   | SNLAYDIVQLPTGLTGIK        | 18 | 952,03 | 1902,0449 |
| 17376 | 83 | IPI00014424 | 35,7 | 35,7 | EGNASGVSLLEALDTILPPTRPTDK | 25 | 865,46 | 2593,3545 |
| 5940  | 84 | IPI00011274 | 55,6 | 55,6 | FGEVVDCTIK                | 10 | 584,29 | 1166,5627 |
| 5940  | 84 | IPI00011274 | 55,6 | 55,6 | FGEVVDCTLK                | 10 | 584,29 | 1166,5627 |

|       |    |             |      |      |                                  |    |        |           |
|-------|----|-------------|------|------|----------------------------------|----|--------|-----------|
| 12239 | 84 | IPI00011274 | 46,6 | 46,6 | GFCFITYTDEEPVK                   | 14 | 853,39 | 1704,7704 |
| 8673  | 84 | IPI00011274 | 57,4 | 57,4 | VFVGGLSPDTSEEQIK                 | 16 | 853,44 | 1704,8562 |
| 9221  | 85 | IPI00024145 | 56,4 | 56,4 | LTLSALVDGK                       | 10 | 508,80 | 1015,59   |
| 8723  | 85 | IPI00024145 | 66,3 | 66,3 | LTFDITTFSPNTGK                   | 13 | 714,85 | 1427,6915 |
| 9173  | 86 | IPI00216587 | 68,6 | 68,6 | NCIVLIDSTPYR                     | 12 | 725,87 | 1449,7264 |
| 8210  | 86 | IPI00216587 | 66,3 | 66,3 | ISSLLEEQFQQGK                    | 13 | 753,89 | 1505,7694 |
| 16022 | 87 | IPI00000816 | 59,6 | 59,6 | LICCDILDVLDK                     | 12 | 738,88 | 1475,7373 |
| 7868  | 88 | IPI00290770 | 55,3 | 55,3 | AVAQALEVIPR                      | 11 | 583,85 | 1165,6812 |
| 13372 | 88 | IPI00290770 | 36,9 | 36,9 | ELGIWEPLAVK                      | 11 | 627,86 | 1253,7004 |
| 12337 | 88 | IPI00290770 | 69,4 | 69,4 | WSSLACNIALDAVK                   | 14 | 774,40 | 1546,7808 |
| 9163  | 91 | IPI00000874 | 48,8 | 48,8 | GLFIIDDK                         | 8  | 460,76 | 919,5002  |
| 5803  | 91 | IPI00000874 | 29,8 | 29,8 | TIAQDYGVVK                       | 10 | 554,31 | 1106,5956 |
| 2330  | 91 | IPI00000874 | 45   | 45   | ATAV(M)PDGQFK                    | 11 | 590,79 | 1179,5576 |
| 7098  | 91 | IPI00000874 | 52,6 | 52,6 | QITVNDLPVGR                      | 11 | 606,34 | 1210,665  |
| 12197 | 92 | IPI00008529 | 90   | 90   | NIEDVIAQGIGK                     | 12 | 628,85 | 1255,6757 |
| 8238  | 92 | IPI00008529 | 34   | 34   | LASVPAGGAVAVSAAPGSAAPAAGSAPAAAEK | 33 | 925,48 | 2773,4238 |
| 8845  | 93 | IPI00002520 | 90   | 90   | VLELVSITANK                      | 11 | 593,86 | 1185,6956 |
| 12279 | 93 | IPI00002520 | 62,7 | 62,7 | TGLIDYNQLALTAR                   | 14 | 774,92 | 1547,8311 |
| 4810  | 94 | IPI00221222 | 38,5 | 38,5 | VLIDIR                           | 6  | 364,74 | 727,4576  |
| 12807 | 94 | IPI00221222 | 59,9 | 59,9 | GISLNPEQWSQLK                    | 13 | 750,40 | 1498,7762 |
| 9314  | 95 | IPI00027107 | 44,7 | 44,7 | ELLTEFGYK                        | 9  | 550,29 | 1098,5583 |
| 13767 | 95 | IPI00027107 | 68   | 68   | LLDAVDITYIPVPR                   | 14 | 771,93 | 1541,8441 |
| 16252 | 95 | IPI00027107 | 58,3 | 58,3 | GEETPVIVGSALCALEGR               | 18 | 929,47 | 1856,9297 |
| 3520  | 96 | IPI00299573 | 32,1 | 32,1 | KVVNPLFEK                        | 9  | 537,32 | 1072,6265 |
| 5968  | 96 | IPI00299573 | 40,2 | 40,2 | NFGIGQDIQPK                      | 11 | 608,82 | 1215,6233 |
| 6633  | 96 | IPI00299573 | 57,9 | 57,9 | AGVNTVTTLVENK                    | 13 | 673,37 | 1344,7227 |
| 12282 | 96 | IPI00299573 | 37,2 | 37,2 | VPPAINQFTQALDR                   | 14 | 785,42 | 1568,8282 |
| 4668  | 96 | IPI00299573 | 66,7 | 66,7 | TCTTVAFTQVNSEDK                  | 15 | 850,89 | 1699,7712 |
| 12862 | 97 | IPI00031804 | 53   | 53   | LTLDTIFVPNTGK                    | 13 | 709,90 | 1417,7798 |
| 6890  | 98 | IPI00554648 | 59,3 | 59,3 | LSELEAALQR                       | 10 | 565,31 | 1128,6104 |

|       |     |             |      |      |                         |    |        |           |
|-------|-----|-------------|------|------|-------------------------|----|--------|-----------|
| 4618  | 98  | IPI00554648 | 33,9 | 33,9 | YEELQSLAGK              | 10 | 569,29 | 1136,5698 |
| 2777  | 98  | IPI00554648 | 29,1 | 29,1 | EYQEL(M)NVK             | 9  | 585,28 | 1168,5417 |
| 9056  | 98  | IPI00554648 | 50,9 | 50,9 | ASLEAAIADAEQR           | 13 | 672,84 | 1343,6664 |
| 14787 | 98  | IPI00554648 | 38,1 | 38,1 | LEGLTDEINFLR            | 12 | 710,38 | 1418,7395 |
| 12537 | 99  | IPI00746388 | 46,2 | 46,2 | IGFPWSEIR               | 9  | 552,79 | 1103,5747 |
| 10307 | 99  | IPI00746388 | 56,3 | 56,3 | APDFVIFYAPR             | 10 | 591,80 | 1181,5854 |
| 11334 | 99  | IPI00746388 | 56,5 | 56,5 | SQEQLAAELAEYTAK         | 15 | 826,41 | 1650,8091 |
| 11292 | 100 | IPI00642816 | 59,9 | 59,9 | VTDDLVLCLVYK            | 11 | 662,84 | 1323,6736 |
| 8148  | 100 | IPI00642816 | 86,1 | 86,1 | PQYQTWEEFSR             | 11 | 735,83 | 1469,6552 |
| 5340  | 102 | IPI00025849 | 62,5 | 62,5 | VSGGLEVLAEK             | 11 | 551,31 | 1100,6071 |
| 13747 | 102 | IPI00025849 | 55,9 | 55,9 | LLPQLTYLDGYDR           | 13 | 783,91 | 1565,8073 |
| 15237 | 102 | IPI00025849 | 39,1 | 39,1 | SLDLFNCEVTNLNDYR        | 16 | 986,96 | 1971,8981 |
| 6593  | 103 | IPI00026154 | 48,5 | 48,5 | LWEEQLAAAK              | 10 | 579,81 | 1157,6067 |
| 2822  | 103 | IPI00026154 | 34,4 | 34,4 | ESLQQ(M)AEVTR           | 11 | 654,32 | 1306,6177 |
| 5685  | 103 | IPI00026154 | 58,5 | 58,5 | AQQEQELAADAFK           | 13 | 724,85 | 1447,6923 |
| 3080  | 103 | IPI00026154 | 64,8 | 64,8 | YEQGTGCWQGNR            | 13 | 776,83 | 1551,6512 |
| 8911  | 104 | IPI00009342 | 54,9 | 54,9 | FLSAIVSSVDK             | 11 | 583,33 | 1164,6371 |
| 6765  | 104 | IPI00009342 | 53,2 | 53,2 | GLQQQNSDWYLK            | 12 | 740,36 | 1478,7134 |
| 11384 | 104 | IPI00009342 | 69,7 | 69,7 | VDQIQEIVTGNPTVIK        | 16 | 877,49 | 1752,9631 |
| 16157 | 104 | IPI00009342 | 29,2 | 29,2 | LEGVLAEVAQHYQDTLIR      | 18 | 685,70 | 2054,0759 |
| 5658  | 105 | IPI00296337 | 39,1 | 39,1 | LNESTFDTQITK            | 12 | 698,85 | 1395,6871 |
| 17409 | 105 | IPI00296337 | 59,1 | 59,1 | NLLIFENLIDLK            | 12 | 722,92 | 1443,8273 |
| 6580  | 105 | IPI00296337 | 51,8 | 51,8 | SQGCSEQVLTVLK           | 13 | 724,87 | 1447,7317 |
| 9281  | 105 | IPI00296337 | 52,3 | 52,3 | NLSSNEAISLEEIR          | 14 | 787,90 | 1573,7871 |
| 7083  | 106 | IPI00171903 | 40,7 | 40,7 | INEILSNALK              | 10 | 557,83 | 1113,6377 |
| 13077 | 106 | IPI00171903 | 48,5 | 48,5 | AFITNIPFDVK             | 11 | 632,85 | 1263,6857 |
| 10437 | 106 | IPI00171903 | 39,2 | 39,2 | LGSTVFFVANLDYK          | 13 | 713,88 | 1425,7474 |
| 4371  | 106 | IPI00171903 | 48,4 | 48,4 | (M)GPA(M)GPALGAGIER     | 15 | 730,35 | 1458,6952 |
| 8005  | 106 | IPI00171903 | 32,4 | 32,4 | GNFGGSFAGSFGGAGGHAPGVAR | 23 | 678,99 | 2033,9429 |
| 8338  | 107 | IPI00017334 | 50,3 | 50,3 | FDAGELITQR              | 10 | 575,30 | 1148,5813 |



|       |     |             |      |      |                                    |    |        |           |
|-------|-----|-------------|------|------|------------------------------------|----|--------|-----------|
| 8060  | 107 | IPI00017334 | 71,4 | 71,4 | DLQNVNITLR                         | 10 | 593,33 | 1184,6498 |
| 16809 | 107 | IPI00017334 | 65,3 | 65,3 | NITYLPAGQSVLLQLPQ                  | 17 | 928,02 | 1854,0229 |
| 16986 | 107 | IPI00017334 | 32,6 | 32,6 | GVQDIVVGEGTHFLIPWVQK               | 20 | 741,40 | 2221,1809 |
| 3500  | 108 | IPI00171611 | 41,2 | 41,2 | STEILLR                            | 7  | 416,25 | 830,4846  |
| 3500  | 108 | IPI00171611 | 41,2 | 41,2 | STELLIR                            | 7  | 416,25 | 830,4846  |
| 4107  | 108 | IPI00171611 | 30,4 | 30,4 | KSDVEAIFSK                         | 10 | 562,30 | 1122,5903 |
| 17974 | 108 | IPI00171611 | 69,2 | 69,2 | FQSSAV(M)ALQEASEAYLVGLFEDTNLCAIHAK | 32 | 883,18 | 3528,6729 |
| 4888  | 110 | IPI00220327 | 54,8 | 54,8 | YEELQITAGR                         | 10 | 590,30 | 1178,5909 |
| 5020  | 110 | IPI00220327 | 55,4 | 55,4 | TNAENEFVTIK                        | 11 | 633,32 | 1264,6274 |
| 10767 | 110 | IPI00220327 | 30,4 | 30,4 | WELLQQVDTSTR                       | 12 | 738,38 | 1474,7402 |
| 5360  | 110 | IPI00220327 | 67,6 | 67,6 | FLEQQNQVLQTK                       | 12 | 738,40 | 1474,7765 |
| 10752 | 111 | IPI00179964 | 49,3 | 49,3 | LSLDGQNIYNACCTLR                   | 16 | 949,45 | 1896,8802 |
| 17299 | 111 | IPI00179964 | 79   | 79   | LPIDVTEGEVISLGLPFGK                | 19 | 992,55 | 1983,0886 |
| 16874 | 111 | IPI00179964 | 42,3 | 42,3 | KLPIDVTEGEVISLGLPFGK               | 20 | 704,74 | 2111,1863 |
| 14022 | 111 | IPI00179964 | 39,3 | 39,3 | NNQFQALLQYADPVSAQHAK               | 20 | 748,38 | 2242,1094 |
| 5633  | 112 | IPI00643041 | 42,1 | 42,1 | NLQYYDISAK                         | 10 | 607,81 | 1213,5963 |
| 7055  | 112 | IPI00643041 | 37,3 | 37,3 | FNVWDTAGQEK                        | 11 | 647,81 | 1293,5978 |
| 8508  | 112 | IPI00643041 | 71,7 | 71,7 | VCENIPIVLCGNK                      | 13 | 758,39 | 1514,7565 |
| 13744 | 113 | IPI00005198 | 63,4 | 63,4 | ILPTLEAVAALGNK                     | 14 | 705,42 | 1408,8278 |
| 4548  | 113 | IPI00005198 | 65,9 | 65,9 | WFEENASQSTVK                       | 12 | 713,34 | 1424,6569 |
| 7600  | 114 | IPI00010720 | 31,3 | 31,3 | ISDSVLVDIK                         | 10 | 544,81 | 1087,6112 |
| 16854 | 114 | IPI00010720 | 89,5 | 89,5 | LGFAGLVQEISFGTTK                   | 16 | 834,45 | 1666,8916 |
| 17256 | 114 | IPI00010720 | 68,4 | 68,4 | WVGGPEIELIAIATGGR                  | 17 | 869,98 | 1737,9373 |
| 3667  | 115 | IPI00001639 | 42   | 42   | DTAAWTVGR                          | 9  | 488,75 | 975,4758  |
| 2930  | 115 | IPI00001639 | 29,9 | 29,9 | TTLVI(M)ER                         | 8  | 489,77 | 977,5203  |
| 14652 | 115 | IPI00001639 | 46   | 46   | LAATNALLNSLEFTK                    | 15 | 803,45 | 1604,8761 |
| 13697 | 115 | IPI00001639 | 49,9 | 49,9 | ESCLEAYTGIVQGLK                    | 15 | 834,42 | 1666,8235 |
| 17511 | 115 | IPI00001639 | 43,2 | 43,2 | GALQYLVPILTQTLTK                   | 16 | 587,02 | 1758,024  |
| 10056 | 116 | IPI00000875 | 39   | 39   | STFVLDEFK                          | 9  | 543,28 | 1084,5425 |
| 16190 | 116 | IPI00000875 | 61,9 | 61,9 | ILGLLDAYLK                         | 10 | 559,84 | 1117,6732 |

|       |     |             |      |      |                             |    |         |           |
|-------|-----|-------------|------|------|-----------------------------|----|---------|-----------|
| 4178  | 117 | IPI00217465 | 32,2 | 32,2 | SGVSLAALK                   | 9  | 423,26  | 844,5008  |
| 5793  | 117 | IPI00217465 | 55,8 | 55,8 | ASGPPVSELITK                | 12 | 599,84  | 1197,657  |
| 7090  | 118 | IPI00018465 | 41   | 41   | TFSYAGFE(M)QPK              | 12 | 711,32  | 1420,6328 |
| 13222 | 118 | IPI00018465 | 62,5 | 62,5 | LPIGDVATQYFADR              | 14 | 783,40  | 1564,7887 |
| 5845  | 119 | IPI00008530 | 35,3 | 35,3 | GNVGFVFTK                   | 9  | 484,76  | 967,5121  |
| 10227 | 119 | IPI00008530 | 29,9 | 29,9 | IIQLLDDYPK                  | 10 | 609,34  | 1216,6688 |
| 14197 | 119 | IPI00008530 | 70,1 | 70,1 | TSFFQALGITTK                | 12 | 657,36  | 1312,7004 |
| 14947 | 119 | IPI00008530 | 53,1 | 53,1 | GTIEILSDVQLIK               | 13 | 714,92  | 1427,8221 |
| 8753  | 124 | IPI00023748 | 76,8 | 76,8 | SPASDTYIVFGEAK              | 14 | 742,87  | 1483,7188 |
| 11657 | 125 | IPI00413108 | 55,2 | 55,2 | AIVAIENPADVSVISSR           | 17 | 870,98  | 1739,941  |
| 15765 | 125 | IPI00413108 | 59,4 | 59,4 | ADHQPLTEASYVNLPTIALCNTDSPLR | 27 | 999,50  | 2995,4683 |
| 15242 | 126 | IPI00031461 | 44,3 | 44,3 | FVSISDLLVPK                 | 11 | 609,36  | 1216,7052 |
| 13794 | 126 | IPI00031461 | 60,5 | 60,5 | NPYYGGESASITPLEDLYK         | 19 | 1059,01 | 2115,9958 |
| 5533  | 127 | IPI00604590 | 37,8 | 37,8 | GDFCIQVGR                   | 9  | 526,25  | 1050,4904 |
| 8891  | 127 | IPI00604590 | 41,4 | 41,4 | DRPFFAGLVK                  | 10 | 383,88  | 1148,6324 |
| 8285  | 127 | IPI00604590 | 30,4 | 30,4 | DRPFFPGLVK                  | 10 | 588,33  | 1174,6481 |
| 5058  | 127 | IPI00604590 | 37,1 | 37,1 | TFIAIKPDGVQR                | 12 | 672,88  | 1343,7537 |
| 5953  | 128 | IPI00215914 | 52,5 | 52,5 | IL(M)VGLDAAGK               | 11 | 552,31  | 1102,6039 |
| 13147 | 128 | IPI00215914 | 58,8 | 58,8 | NISFTVWDVGGQDK              | 14 | 783,38  | 1564,7502 |
| 11229 | 129 | IPI00024915 | 53,9 | 53,9 | VNLAELFK                    | 8  | 467,27  | 932,5314  |
| 5155  | 129 | IPI00024915 | 44,9 | 44,9 | FS(M)VVQDGIVK               | 11 | 619,83  | 1237,6361 |
| 8715  | 130 | IPI00290566 | 44,4 | 44,4 | EQLAIAEFAR                  | 10 | 574,31  | 1146,6028 |
| 7840  | 130 | IPI00290566 | 34,6 | 34,6 | VLCELADLQDK                 | 11 | 652,33  | 1302,6476 |
| 11282 | 130 | IPI00290566 | 70,7 | 70,7 | YINENLIVNTDELGR             | 15 | 881,95  | 1761,8872 |
| 5580  | 131 | IPI00465439 | 50,2 | 50,2 | PYQYPALTPEQK                | 12 | 717,87  | 1433,7166 |
| 10407 | 131 | IPI00465439 | 39,6 | 39,6 | YTPSGQAGAAASESLFVSNHAY      | 22 | 1114,52 | 2227,0161 |
| 4705  | 133 | IPI00018206 | 61,4 | 61,4 | IGASFLQR                    | 8  | 446,26  | 890,4958  |
| 2947  | 133 | IPI00018206 | 37,9 | 37,9 | (M)NLGVGAYR                 | 9  | 498,75  | 995,4846  |
| 9036  | 133 | IPI00018206 | 62,5 | 62,5 | IAAAILNTPDLR                | 12 | 634,37  | 1266,7278 |
| 13282 | 134 | IPI00645078 | 41,6 | 41,6 | LAGTQPLEVLEAVQR             | 15 | 812,46  | 1622,8989 |

|       |     |             |      |      |                    |    |        |           |
|-------|-----|-------------|------|------|--------------------|----|--------|-----------|
| 16481 | 134 | IPI00645078 | 48,3 | 48,3 | AAVATFLQSVQVPEFTPK | 18 | 967,02 | 1932,0331 |
| 5068  | 135 | IPI00219219 | 41,4 | 41,4 | LPDGYEFK           | 8  | 484,74 | 967,4628  |
| 6025  | 135 | IPI00219219 | 53,9 | 53,9 | DSNNLCLHFNPR       | 12 | 743,85 | 1485,6759 |
| 6645  | 136 | IPI00398135 | 45,1 | 45,1 | TGAAPIIDVVR        | 11 | 556,33 | 1110,6385 |
| 8020  | 136 | IPI00398135 | 34,4 | 34,4 | LWTLVSEQTR         | 10 | 616,83 | 1231,6544 |
| 5898  | 136 | IPI00398135 | 44   | 44   | NQSF CPTVNLDK      | 12 | 711,84 | 1421,6589 |
| 7653  | 137 | IPI00334587 | 68,5 | 68,5 | IFVGGLNPEATEEK     | 14 | 752,39 | 1502,7604 |
| 6988  | 138 | IPI00298363 | 48,2 | 48,2 | IGGGIDVPVPR        | 11 | 540,31 | 1078,6116 |
| 12074 | 138 | IPI00298363 | 54   | 54   | IINDLLQSLR         | 10 | 592,85 | 1183,6908 |
| 15047 | 139 | IPI00009032 | 49,3 | 49,3 | ETDLLILFK          | 9  | 546,32 | 1090,6263 |
| 16382 | 139 | IPI00009032 | 54,3 | 54,3 | GSIFVVFDSIESAK     | 14 | 749,89 | 1497,7725 |
| 8818  | 140 | IPI00025512 | 35,3 | 35,3 | GPSWDPFR           | 8  | 481,23 | 960,444   |
| 11749 | 140 | IPI00025512 | 55,1 | 55,1 | LFDQAFGLPR         | 10 | 582,31 | 1162,6121 |
| 11947 | 140 | IPI00025512 | 40,7 | 40,7 | LATQSNEITIPVTFESR  | 17 | 953,50 | 1904,9818 |
| 7610  | 141 | IPI00219217 | 36,6 | 36,6 | SADTLWDIQR         | 10 | 588,80 | 1175,5809 |
| 8240  | 141 | IPI00219217 | 55,7 | 55,7 | MVVESAYEVIK        | 11 | 634,33 | 1266,6516 |
| 6663  | 141 | IPI00219217 | 44,1 | 44,1 | LIAPVAEEEEATVPNNK  | 16 | 847,95 | 1693,8861 |
| 6993  | 142 | IPI00302927 | 84,7 | 84,7 | ETLLNSATTSLNSK     | 14 | 739,89 | 1477,7607 |
| 13342 | 142 | IPI00302927 | 33,4 | 33,4 | ALIAGGGAPEIELALR   | 16 | 775,95 | 1549,8813 |
| 7618  | 143 | IPI00022774 | 37,5 | 37,5 | GILLYGPPGTGK       | 12 | 586,84 | 1171,6587 |
| 9103  | 143 | IPI00022774 | 54,6 | 54,6 | LGDVISIQPCPDVK     | 14 | 770,90 | 1539,7952 |
| 17576 | 143 | IPI00022774 | 44,3 | 44,3 | NAPAIIFIDELDAIAPK  | 17 | 906,00 | 1809,9812 |
| 4630  | 144 | IPI00012066 | 75,6 | 75,6 | PSSSPVIFAGGQDR     | 14 | 709,36 | 1416,698  |
| 16235 | 144 | IPI00012066 | 42,9 | 42,9 | AITIAGIPQSIIECVK   | 16 | 856,98 | 1711,954  |
| 7253  | 145 | IPI00219153 | 55,5 | 55,5 | ITVTSEVPFSK        | 11 | 604,33 | 1206,6482 |
| 5050  | 145 | IPI00219153 | 46,1 | 46,1 | AGNLGGGVVTIER      | 13 | 621,84 | 1241,6708 |
| 5443  | 146 | IPI00009904 | 55,9 | 55,9 | LPLQDVYK           | 8  | 488,28 | 974,5419  |
| 7820  | 146 | IPI00009904 | 30,5 | 30,5 | FDVSGYPTIK         | 10 | 563,79 | 1125,5695 |
| 3250  | 146 | IPI00009904 | 51,5 | 51,5 | VSQGQLVV(M)QPEK    | 13 | 729,88 | 1457,7529 |
| 13329 | 146 | IPI00009904 | 46,1 | 46,1 | VEGFPTIYFAPSGDK    | 15 | 814,40 | 1626,79   |

|       |     |             |      |      |                         |    |        |           |
|-------|-----|-------------|------|------|-------------------------|----|--------|-----------|
| 6128  | 147 | IPI00444262 | 42,6 | 42,6 | TGISDVFAK               | 9  | 469,25 | 936,4901  |
| 5525  | 147 | IPI00444262 | 33,7 | 33,7 | SISLYYTGEK              | 10 | 580,79 | 1159,5742 |
| 13177 | 147 | IPI00444262 | 41   | 41   | FGYVDFESAEDLEK          | 14 | 824,87 | 1647,7286 |
| 17321 | 148 | IPI00045109 | 30,9 | 30,9 | LLGGVTIAQGGVLPNIQAVLLPK | 23 | 757,79 | 2270,3618 |
| 8913  | 149 | IPI00219525 | 53   | 53   | GILFVGSGVSGGEEGAR       | 17 | 796,41 | 1590,7979 |
| 17366 | 149 | IPI00219525 | 73,6 | 73,6 | NPELQNLLLDFFK           | 14 | 853,44 | 1704,8656 |
| 6343  | 150 | IPI00376798 | 29,3 | 29,3 | YDGILPGK                | 9  | 488,28 | 974,5424  |
| 10127 | 150 | IPI00376798 | 72,2 | 72,2 | VLEQLTGQTPVFSK          | 14 | 773,93 | 1545,8398 |
| 2957  | 151 | IPI00025491 | 33,8 | 33,8 | VFD(M)LNR               | 7  | 455,73 | 909,4363  |
| 10377 | 151 | IPI00025491 | 64,2 | 64,2 | VLITTDLLAR              | 10 | 557,84 | 1113,6746 |
| 10647 | 152 | IPI00032140 | 45,3 | 45,3 | DTQSGSLLFIGR            | 12 | 647,34 | 1292,6719 |
| 13454 | 152 | IPI00032140 | 63,7 | 63,7 | LYGPSSVSFADDFVR         | 15 | 830,40 | 1658,7926 |
| 15272 | 153 | IPI00021926 | 67,6 | 67,6 | ALQSVGQIVGEVLK          | 14 | 720,92 | 1439,8333 |
| 6900  | 154 | IPI00012750 | 61   | 61   | AALQELLSK               | 9  | 486,79 | 971,5634  |
| 8678  | 154 | IPI00012750 | 45,8 | 45,8 | LNNLVLFDK               | 9  | 538,31 | 1074,6057 |
| 14597 | 155 | IPI00215884 | 44,1 | 44,1 | GGPPFAFVEFEDPR          | 14 | 782,88 | 1563,7356 |
| 9178  | 156 | IPI00306825 | 71   | 71   | LGLSTLGELK              | 10 | 515,81 | 1029,6053 |
| 5358  | 156 | IPI00306825 | 34,1 | 34,1 | VEEEIVTLR               | 9  | 544,30 | 1086,5908 |
| 11937 | 157 | IPI00396370 | 78,7 | 78,7 | GTQGVVTNFEIFR           | 13 | 734,38 | 1466,7487 |
| 14067 | 158 | IPI00003377 | 70,4 | 70,4 | NPPGFAFVEFEDPR          | 14 | 811,39 | 1620,7563 |
| 8230  | 160 | IPI00550363 | 29   | 29   | ENFQNWLK                | 8  | 539,77 | 1077,5227 |
| 3020  | 160 | IPI00550363 | 51,5 | 51,5 | NVIGLQ(M)GTNR           | 11 | 609,82 | 1217,6171 |
| 7128  | 160 | IPI00550363 | 48,8 | 48,8 | TL(M)NLGGLAVAR          | 12 | 616,34 | 1230,674  |
| 14157 | 161 | IPI00178352 | 37,3 | 37,3 | SPFVVNVAPPLDLSK         | 15 | 791,94 | 1581,8746 |
| 13802 | 162 | IPI00010796 | 41,3 | 41,3 | ILEFFGLK                | 8  | 483,79 | 965,5573  |
| 13907 | 162 | IPI00010796 | 37,7 | 37,7 | ENLLDFIK                | 8  | 496,28 | 990,5373  |
| 4127  | 162 | IPI00010796 | 46,9 | 46,9 | LITLLEE(M)TK            | 10 | 611,81 | 1221,6144 |
| 10987 | 163 | IPI00001589 | 65,4 | 65,4 | VQIAVANAQELLQR          | 14 | 776,94 | 1551,8723 |
| 3205  | 164 | IPI00335168 | 66,8 | 66,8 | ILYSQCGDV(M)R           | 11 | 679,31 | 1356,615  |
| 8978  | 165 | IPI00302925 | 44,9 | 44,9 | FAEAFEAI PR             | 10 | 575,80 | 1149,5795 |

|       |     |             |      |      |                                    |    |         |           |
|-------|-----|-------------|------|------|------------------------------------|----|---------|-----------|
| 10894 | 165 | IPI00302925 | 32,1 | 32,1 | LFVTNDAATILR                       | 12 | 667,38  | 1332,7375 |
| 11477 | 165 | IPI00302925 | 56,3 | 56,3 | NVGLDIEAEVPAVK                     | 14 | 727,40  | 1452,7811 |
| 8108  | 166 | IPI00006052 | 62,7 | 62,7 | IETLTQQLQAK                        | 12 | 693,40  | 1384,7906 |
| 6313  | 167 | IPI00215780 | 46,7 | 46,7 | VLQALEGLK                          | 9  | 485,80  | 969,5843  |
| 6210  | 167 | IPI00215780 | 45,1 | 45,1 | VPEWVDTVK                          | 9  | 536,79  | 1071,5585 |
| 17764 | 168 | IPI00465070 | 55,5 | 55,5 | FQSSAV(M)ALQEACEAYLVGLFEDTNLCAIHAK | 32 | 901,43  | 3601,6777 |
| 7763  | 169 | IPI00011253 | 45,7 | 45,7 | GLCAIAQAESLR                       | 12 | 644,84  | 1287,6583 |
| 12359 | 169 | IPI00011253 | 52,9 | 52,9 | FGFPEGSVELYAEK                     | 14 | 786,88  | 1571,7499 |
| 3502  | 169 | IPI00011253 | 40,3 | 40,3 | GGKPEPPA(M)PQPVPPTA                | 16 | 795,40  | 1588,7902 |
| 13922 | 169 | IPI00011253 | 39,5 | 39,5 | FVDGL(M)IHSGDPVNYVDTAVR            | 22 | 828,73  | 2483,1799 |
| 11784 | 172 | IPI00010402 | 58,5 | 58,5 | IQYQLVDISQDNALR                    | 15 | 888,47  | 1774,92   |
| 6073  | 173 | IPI00011200 | 71,3 | 71,3 | ILQDGGLQVVEK                       | 12 | 649,87  | 1297,7225 |
| 5125  | 174 | IPI00009634 | 68,1 | 68,1 | TAAAVAAQSGILDR                     | 14 | 672,37  | 1342,7181 |
| 12304 | 174 | IPI00009634 | 33,7 | 33,7 | YADALQEIIQER                       | 12 | 724,87  | 1447,7281 |
| 11534 | 174 | IPI00009634 | 34,2 | 34,2 | EGNAIFTFPNTPVK                     | 14 | 767,90  | 1533,7816 |
| 7175  | 175 | IPI00017617 | 40,5 | 40,5 | APILIATDVASR                       | 12 | 613,86  | 1225,701  |
| 7665  | 175 | IPI00017617 | 43   | 43   | TTYLVLDEADR                        | 11 | 648,33  | 1294,6406 |
| 10997 | 175 | IPI00017617 | 39,3 | 39,3 | GDGPICLVLAPTR                      | 13 | 684,87  | 1367,7205 |
| 5518  | 176 | IPI00028091 | 54,1 | 54,1 | LPACVVDCGTGYTK                     | 14 | 770,86  | 1539,7043 |
| 16581 | 176 | IPI00028091 | 42,4 | 42,4 | TLTGTVIDSGDGVTHVIPVAEGYVIGSCIK     | 30 | 1020,20 | 3057,5659 |
| 7728  | 177 | IPI00456898 | 58,5 | 58,5 | LGEWVGLCK                          | 9  | 531,28  | 1060,536  |
| 5265  | 178 | IPI00297779 | 39   | 39   | GSGNLEAIHIIK                       | 12 | 626,36  | 1250,6962 |
| 5648  | 178 | IPI00297779 | 54   | 54   | GATQQILDEAER                       | 12 | 665,83  | 1329,6508 |
| 5040  | 179 | IPI00024933 | 38,3 | 38,3 | IGPLGLSPK                          | 9  | 441,28  | 880,5367  |
| 6325  | 179 | IPI00024933 | 48,9 | 48,9 | EILGTAQSVGCNVDGR                   | 16 | 838,41  | 1674,7976 |
| 9614  | 179 | IPI00024933 | 29,8 | 29,8 | HPHDIIDDINSGAVECPAS                | 19 | 682,98  | 2045,9088 |
| 9156  | 180 | IPI00010779 | 64,4 | 64,4 | LVILEGELER                         | 10 | 585,84  | 1169,6635 |
| 7613  | 180 | IPI00010779 | 32,1 | 32,1 | IQLVEEELDR                         | 10 | 622,33  | 1242,6444 |
| 10482 | 181 | IPI00218733 | 60   | 60   | GDGPVQGIINFEQK                     | 14 | 751,38  | 1500,7545 |
| 11907 | 182 | IPI00006935 | 70,5 | 70,5 | VHLVGIDIFTGK                       | 12 | 649,88  | 1297,7374 |

|       |     |             |      |      |                       |    |         |           |
|-------|-----|-------------|------|------|-----------------------|----|---------|-----------|
| 10177 | 183 | IPI00218342 | 53,1 | 53,1 | YVVVTGITPTPLGEGK      | 16 | 815,96  | 1629,8981 |
| 5285  | 184 | IPI00328319 | 53,5 | 53,5 | GEFGGFGSVSGK          | 12 | 564,77  | 1127,5226 |
| 10382 | 184 | IPI00328319 | 52,6 | 52,6 | TPSSDVLVFDYTK         | 13 | 736,37  | 1470,7218 |
| 11447 | 185 | IPI00032826 | 30,3 | 30,3 | AIDLFTDAIK            | 10 | 553,81  | 1105,6006 |
| 5788  | 185 | IPI00032826 | 32,5 | 32,5 | AIEINPDSAQPYK         | 13 | 723,37  | 1444,7181 |
| 7633  | 185 | IPI00032826 | 66,4 | 66,4 | VAAIEALNDGELQK        | 14 | 735,89  | 1469,7708 |
| 12504 | 186 | IPI00013485 | 33,7 | 33,7 | TYSYLTPDLWK           | 11 | 693,85  | 1385,6851 |
| 8550  | 186 | IPI00013485 | 35   | 35   | SPYQEFTDHLVK          | 12 | 488,58  | 1462,7072 |
| 17034 | 186 | IPI00013485 | 60,5 | 60,5 | SLEEIYLFSLPIK         | 13 | 776,44  | 1550,8583 |
| 4540  | 187 | IPI00219757 | 33,1 | 33,1 | ASCLYGQLPK            | 10 | 568,79  | 1135,5688 |
| 4885  | 187 | IPI00219757 | 49,9 | 49,9 | (M)LLADQGQSWK         | 11 | 646,82  | 1291,6208 |
| 11259 | 187 | IPI00219757 | 55,5 | 55,5 | PPYTVVYFPVR           | 11 | 669,37  | 1336,7177 |
| 13332 | 188 | IPI00221092 | 39   | 39   | LLEPVLLLK             | 10 | 547,86  | 1093,7092 |
| 7073  | 189 | IPI00020984 | 40   | 40   | TPELNLDQFHDK          | 12 | 728,86  | 1455,6981 |
| 12267 | 189 | IPI00020984 | 48,3 | 48,3 | APVPTGEVYFADSFDR      | 16 | 885,92  | 1769,8254 |
| 12142 | 190 | IPI00306960 | 79,6 | 79,6 | IFDSEEILAGYK          | 12 | 692,85  | 1383,691  |
| 7225  | 191 | IPI00031522 | 51   | 51   | TLQEVTQLSQAQR         | 14 | 815,92  | 1629,8314 |
| 15977 | 191 | IPI00031522 | 42,6 | 42,6 | TVLGTPEVLLGALPGAGGTQR | 21 | 1004,06 | 2006,1144 |
| 5935  | 192 | IPI00465260 | 51,5 | 51,5 | TVNVVQFEPK            | 11 | 624,33  | 1246,6542 |
| 12032 | 193 | IPI00016610 | 43,3 | 43,3 | IITLTGPTNAIFK         | 13 | 694,91  | 1387,8051 |
| 7640  | 193 | IPI00016610 | 31,5 | 31,5 | LVVPATQCGSLIGK        | 14 | 721,90  | 1441,7936 |
| 10289 | 193 | IPI00016610 | 36,8 | 36,8 | AITIAGVPQSVTECVK      | 16 | 836,95  | 1671,8864 |
| 11752 | 194 | IPI00793696 | 55,5 | 55,5 | TAVETAVLLLR           | 11 | 593,36  | 1184,7107 |
| 6768  | 194 | IPI00793696 | 76,7 | 76,7 | AITGASLADI(M)AK       | 13 | 639,34  | 1276,6672 |
| 7350  | 195 | IPI00395627 | 37   | 37   | SFDLLVK               | 7  | 411,24  | 820,4682  |
| 3830  | 195 | IPI00395627 | 54,7 | 54,7 | ISNYGWDQSDK           | 11 | 656,79  | 1311,573  |
| 11497 | 196 | IPI00301503 | 75   | 75   | YGPIADVSIYDQQR        | 16 | 905,95  | 1809,8889 |
| 12842 | 197 | IPI00005158 | 39,2 | 39,2 | DIIALNPLYR            | 10 | 594,34  | 1186,6693 |
| 15344 | 197 | IPI00005158 | 56,2 | 56,2 | LSSDVLTLLIK           | 11 | 601,37  | 1200,7317 |
| 10672 | 198 | IPI00646304 | 48,6 | 48,6 | TVDNFVALATGEK         | 13 | 682,86  | 1363,6965 |

|       |     |             |      |      |                            |    |         |           |
|-------|-----|-------------|------|------|----------------------------|----|---------|-----------|
| 3445  | 198 | IPI00646304 | 45,1 | 45,1 | HYGPGWVS(M)ANAGK           | 14 | 497,57  | 1489,6752 |
| 17456 | 199 | IPI00329389 | 73,8 | 73,8 | ASITPGTILILTGR             | 15 | 763,46  | 1524,915  |
| 3000  | 201 | IPI00027230 | 39,9 | 39,9 | IYF(M)AGSSR                | 9  | 524,25  | 1046,4847 |
| 9008  | 201 | IPI00027230 | 33   | 33   | SILFVPTSAPR                | 11 | 594,34  | 1186,6705 |
| 9419  | 201 | IPI00027230 | 32,8 | 32,8 | GVVDSDDLPLNVS              | 14 | 743,38  | 1484,7432 |
| 16686 | 201 | IPI00027230 | 45   | 45   | KGYEVIYLTEPVDEYCIQALPEFDGK | 26 | 1026,17 | 3075,4751 |
| 3280  | 202 | IPI00029601 | 50,9 | 50,9 | SAVGFEYQGK                 | 10 | 543,27  | 1084,5175 |
| 5053  | 202 | IPI00029601 | 45,4 | 45,4 | VDQSAVGFEYQGK              | 13 | 714,34  | 1426,67   |
| 16300 | 206 | IPI00293434 | 58,8 | 58,8 | VLLESEQFLTELTR             | 14 | 839,46  | 1676,8977 |
| 11902 | 207 | IPI00017964 | 31,6 | 31,6 | FLILPD(M)LK                | 9  | 553,32  | 1104,6246 |
| 6318  | 207 | IPI00017964 | 64,1 | 64,1 | VAQLEQVYIR                 | 10 | 609,85  | 1217,6754 |
| 14312 | 208 | IPI00008240 | 61,5 | 61,5 | ITQDIFQQLK                 | 11 | 673,89  | 1345,7589 |
| 12157 | 208 | IPI00008240 | 29,1 | 29,1 | GFVLQDTVEQLR               | 12 | 702,88  | 1403,7404 |
| 11549 | 209 | IPI00013296 | 47,2 | 47,2 | IPDWFLNR                   | 8  | 530,78  | 1059,5482 |
| 4975  | 210 | IPI00291922 | 29,5 | 29,5 | SSLILK                     | 7  | 387,26  | 772,5047  |
| 14644 | 210 | IPI00291922 | 62,4 | 62,4 | LFQVEYAIEAIK               | 12 | 712,40  | 1422,776  |
| 4035  | 211 | IPI00220301 | 31,2 | 31,2 | VATPVDWK                   | 8  | 458,25  | 914,4847  |
| 8373  | 211 | IPI00220301 | 30,2 | 30,2 | VVFVFGPDK                  | 9  | 504,28  | 1006,5477 |
| 11352 | 211 | IPI00220301 | 37,5 | 37,5 | LPFPIIDDR                  | 9  | 543,30  | 1084,5902 |
| 14719 | 211 | IPI00220301 | 31,5 | 31,5 | PGLLLLGDVAPNFEANTTVGR      | 21 | 1049,55 | 2097,084  |
| 11864 | 212 | IPI00298994 | 54,5 | 54,5 | GLAGAVSELLR                | 11 | 543,32  | 1084,6219 |
| 16543 | 213 | IPI00337736 | 69,5 | 69,5 | SVEELLEAELLK               | 12 | 686,88  | 1371,7489 |
| 16718 | 213 | IPI00337736 | 68,1 | 68,1 | GVDEATIIDILTK              | 13 | 694,39  | 1386,7582 |
| 9181  | 214 | IPI00022793 | 43,8 | 43,8 | DQLLLGPTYATPK              | 13 | 708,89  | 1415,7635 |
| 7930  | 217 | IPI00031169 | 67,3 | 67,3 | TASNVEEAFINTAK             | 14 | 747,87  | 1493,7313 |
| 9289  | 218 | IPI00025019 | 67,3 | 67,3 | GAVYSFDPVGSYQR             | 14 | 773,37  | 1544,7246 |
| 8435  | 219 | IPI00006865 | 67   | 67   | NLGSINTELQDVQR             | 14 | 793,91  | 1585,8051 |
| 6138  | 220 | IPI00217468 | 50,2 | 50,2 | ATGPPVSELITK               | 12 | 606,84  | 1211,6746 |
| 7918  | 221 | IPI00010157 | 67   | 67   | FVIGGPQGDAGLTGR            | 15 | 722,88  | 1443,7456 |
| 15787 | 222 | IPI00221232 | 48   | 48   | SDPLLIQIPTSSENPFK          | 16 | 864,46  | 1726,9128 |

|       |     |             |      |      |                        |    |         |           |
|-------|-----|-------------|------|------|------------------------|----|---------|-----------|
| 17354 | 224 | IPI00023860 | 48,1 | 48,1 | GIPEFWLTVFK            | 11 | 668,87  | 1335,7178 |
| 11957 | 224 | IPI00023860 | 36,9 | 36,9 | YAVLYQPLFDK            | 11 | 678,86  | 1355,7103 |
| 14667 | 224 | IPI00023860 | 30,6 | 30,6 | LDGLVETPTGYIESLPR      | 17 | 930,49  | 1858,9666 |
| 3722  | 225 | IPI00015262 | 34,9 | 34,9 | GPSYGLSAEVK            | 11 | 554,29  | 1106,5597 |
| 16861 | 225 | IPI00015262 | 58,4 | 58,4 | TWIEGLTGLSIGPDFQK      | 17 | 931,49  | 1860,9598 |
| 6588  | 226 | IPI00026569 | 40,9 | 40,9 | WAAVVVPSGEEQR          | 13 | 714,37  | 1426,7189 |
| 12937 | 226 | IPI00026569 | 43,1 | 43,1 | FIAVGYVDDTQFVR         | 14 | 815,42  | 1628,8217 |
| 2665  | 227 | IPI00012503 | 36,9 | 36,9 | LGPG(M)ADICK           | 10 | 539,26  | 1076,4983 |
| 15534 | 227 | IPI00012503 | 37,5 | 37,5 | SDVYCEVCEFLVK          | 13 | 824,37  | 1646,7327 |
| 11677 | 228 | IPI00024175 | 40,5 | 40,5 | LTVEDPVTVEYITR         | 14 | 817,94  | 1633,8571 |
| 14977 | 228 | IPI00024175 | 36,4 | 36,4 | AITVFSPDGHLFQVEYAQEAVK | 22 | 817,09  | 2448,2336 |
| 8948  | 229 | IPI00031691 | 36,6 | 36,6 | FLDGIYVSEK             | 10 | 585,80  | 1169,5952 |
| 13982 | 229 | IPI00031691 | 36,5 | 36,5 | DFNHINVELSLLGK         | 14 | 533,62  | 1597,8441 |
| 14532 | 229 | IPI00031691 | 31,8 | 31,8 | TILSNQTVDIPENV DITLK   | 19 | 1057,07 | 2112,1301 |
| 2967  | 230 | IPI00017297 | 32   | 32   | SQAFIE(M)ETR           | 10 | 614,29  | 1226,5583 |
| 14867 | 230 | IPI00017297 | 41,4 | 41,4 | IGPYQPNVPVGIDYVIPK     | 18 | 985,04  | 1968,0713 |
| 17464 | 230 | IPI00017297 | 40,7 | 40,7 | YQLLQLVEPFGVISNHLILNK  | 21 | 813,46  | 2437,3618 |
| 4331  | 231 | IPI00221089 | 43,7 | 43,7 | GLSQSALPYR             | 10 | 546,29  | 1090,5753 |
| 10797 | 231 | IPI00221089 | 46,1 | 46,1 | GLTPSQIGVILR           | 12 | 627,38  | 1252,7487 |
| 12784 | 232 | IPI00186711 | 41,3 | 41,3 | GIYQSLEGAVQAGQLK       | 16 | 831,45  | 1660,8795 |
| 17779 | 232 | IPI00186711 | 43,5 | 43,5 | DGHNLISLLEVLSGDSLPR    | 19 | 679,03  | 2034,0676 |
| 7460  | 233 | IPI00026202 | 29,2 | 29,2 | SSGEIVYCGQVFEK         | 14 | 801,88  | 1601,738  |
| 15930 | 234 | IPI00100160 | 41,4 | 41,4 | LGTLSALDILIK           | 12 | 628,89  | 1255,7737 |
| 9426  | 235 | IPI00033494 | 45,4 | 45,4 | GNFNYIEFTR             | 10 | 630,80  | 1259,5913 |
| 7825  | 236 | IPI00443909 | 63,7 | 63,7 | INPDGSQSVEVPYAR        | 16 | 865,94  | 1729,8617 |
| 8213  | 237 | IPI00465361 | 42,9 | 42,9 | GFSLEELR               | 8  | 475,75  | 949,4847  |
| 9068  | 237 | IPI00465361 | 35,7 | 35,7 | DAGQISGLNVLR           | 12 | 621,84  | 1241,6711 |
| 5903  | 237 | IPI00465361 | 47,6 | 47,6 | LATQLTGVP(M)PVR        | 13 | 699,89  | 1397,7697 |
| 16631 | 241 | IPI00455557 | 63,1 | 63,1 | AAGVNVEPFWPGLFAK       | 16 | 851,95  | 1701,8872 |
| 6283  | 242 | IPI00014177 | 40,4 | 40,4 | VNIVPVIK               | 9  | 476,81  | 951,6102  |



|       |     |             |      |      |                     |    |        |           |
|-------|-----|-------------|------|------|---------------------|----|--------|-----------|
| 15094 | 242 | IPI00014177 | 41,5 | 41,5 | TIISYIDEQFER        | 12 | 757,38 | 1512,7461 |
| 11154 | 244 | IPI00030154 | 44,4 | 44,4 | APLDIPVPDPVK        | 12 | 630,86 | 1259,7104 |
| 6133  | 245 | IPI00015361 | 56,7 | 56,7 | IQQLTALGAAQATAK     | 15 | 742,92 | 1483,8333 |
| 17534 | 245 | IPI00015361 | 33,3 | 33,3 | NQLDQEVFLSTSIAQLK   | 18 | 688,36 | 2062,0498 |
| 11582 | 246 | IPI00479997 | 43,4 | 43,4 | ASGQAFELILSPR       | 13 | 694,88 | 1387,745  |
| 10724 | 247 | IPI00329633 | 42   | 42   | IYGISFPDPK          | 10 | 568,80 | 1135,5898 |
| 8685  | 247 | IPI00329633 | 37,8 | 37,8 | NELSGALTGLTR        | 12 | 616,33 | 1230,6552 |
| 3915  | 248 | IPI00220487 | 45,8 | 45,8 | SWNETLTSR           | 9  | 547,27 | 1092,5186 |
| 12212 | 248 | IPI00220487 | 45,8 | 45,8 | YPYWPHQPIENL        | 12 | 778,88 | 1555,7446 |
| 14942 | 249 | IPI00026302 | 49,7 | 49,7 | LYTLVTYVPVTTFK      | 14 | 822,97 | 1643,9172 |
| 8548  | 250 | IPI00293276 | 45,6 | 45,6 | LLCGLLAER           | 9  | 522,80 | 1043,5779 |
| 7953  | 251 | IPI00297982 | 61,2 | 61,2 | IVLTNPVCTEVGEK      | 14 | 779,91 | 1557,8064 |
| 3070  | 252 | IPI00000873 | 60,9 | 60,9 | YGEAGEGPGWGGAHPR    | 16 | 533,24 | 1596,7048 |
| 8943  | 253 | IPI00456887 | 60,5 | 60,5 | DLLVQQASQCLSK       | 13 | 745,39 | 1488,7592 |
| 4570  | 254 | IPI00163187 | 56,7 | 56,7 | LSCFAQTVSPA EK      | 13 | 719,35 | 1436,6949 |
| 10299 | 255 | IPI00009030 | 45,2 | 45,2 | IPLNDLFR            | 8  | 494,28 | 986,5537  |
| 11152 | 256 | IPI00220362 | 32,6 | 32,6 | DYFLFR              | 6  | 430,72 | 859,4218  |
| 3050  | 256 | IPI00220362 | 41,4 | 41,4 | GGI(M)LPEK          | 8  | 430,73 | 859,4456  |
| 12687 | 256 | IPI00220362 | 29,7 | 29,7 | VVLDDKDYFLFR        | 12 | 510,60 | 1528,7896 |
| 3492  | 257 | IPI00013895 | 46,6 | 46,6 | DGYNYTL SK          | 9  | 530,75 | 1059,4858 |
| 16322 | 257 | IPI00013895 | 42,7 | 42,7 | TEFLSF(M)NTELA AFTK | 16 | 933,45 | 1864,8914 |
| 7848  | 258 | IPI00183968 | 39,5 | 39,5 | MELQEIQLK           | 9  | 566,31 | 1130,5992 |
| 7848  | 258 | IPI00183968 | 39,5 | 39,5 | MELQELQLK           | 9  | 566,31 | 1130,5992 |
| 8155  | 258 | IPI00183968 | 34,2 | 34,2 | LVIIEGDLER          | 10 | 578,83 | 1155,6484 |
| 9429  | 260 | IPI00006211 | 58,2 | 58,2 | GPFTDVVTTNLK        | 12 | 646,35 | 1290,6825 |
| 16994 | 261 | IPI00008433 | 57,8 | 57,8 | TIAECLADELINA AK    | 15 | 544,61 | 1630,8203 |
| 4660  | 262 | IPI00465431 | 48,6 | 48,6 | GNDVAFHFNPR         | 11 | 637,31 | 1272,5981 |
| 6300  | 263 | IPI00335061 | 57,5 | 57,5 | LESPTVSTLTPSSPGK    | 16 | 800,93 | 1599,8354 |
| 9504  | 264 | IPI00015029 | 44,8 | 44,8 | LTFSCLOGGSDNFK      | 13 | 723,34 | 1444,665  |
| 6508  | 265 | IPI00014230 | 55,6 | 55,6 | EVSFQSTGESEWK       | 13 | 757,34 | 1512,6699 |

|       |     |             |      |      |                             |    |        |           |
|-------|-----|-------------|------|------|-----------------------------|----|--------|-----------|
| 4000  | 267 | IPI00003815 | 55,5 | 55,5 | TDY(M)VGSYGPR               | 11 | 631,28 | 1260,5426 |
| 3635  | 268 | IPI00419880 | 29,9 | 29,9 | VVDPFSK                     | 7  | 396,22 | 790,4213  |
| 3420  | 268 | IPI00419880 | 47,1 | 47,1 | TTDGYLLR                    | 8  | 469,75 | 937,4855  |
| 3800  | 269 | IPI00140827 | 55,4 | 55,4 | VAGQDGSVVQFK                | 12 | 617,82 | 1233,6338 |
| 12242 | 270 | IPI00412579 | 55   | 55   | YDAFLASESLIK                | 12 | 678,86 | 1355,6959 |
| 10014 | 271 | IPI00554811 | 43,2 | 43,2 | AENFFILR                    | 8  | 505,28 | 1008,5382 |
| 10297 | 271 | IPI00554811 | 36,9 | 36,9 | ELLQPVTISR                  | 11 | 634,88 | 1267,748  |
| 8085  | 272 | IPI00026167 | 54,5 | 54,5 | LLDLVQQSCNYK                | 12 | 740,88 | 1479,7361 |
| 14997 | 273 | IPI00010810 | 33,8 | 33,8 | LEVAPISDIIAIK               | 13 | 691,42 | 1380,8215 |
| 13192 | 273 | IPI00010810 | 36,6 | 36,6 | ASSTSPVEISEWLDQK            | 16 | 888,94 | 1775,8569 |
| 3665  | 274 | IPI00295741 | 42,1 | 42,1 | ICEPGYSPTYK                 | 11 | 657,80 | 1313,5939 |
| 16591 | 275 | IPI00221093 | 29,9 | 29,9 | LLDFGSLSNLQVTQPTVG(M)NFK    | 22 | 809,09 | 2424,2361 |
| 14194 | 276 | IPI00005154 | 54,2 | 54,2 | FDEISFVNFR                  | 11 | 672,83 | 1343,6501 |
| 12119 | 278 | IPI00002821 | 53,9 | 53,9 | LVAIVDVIDQNR                | 12 | 677,89 | 1353,7611 |
| 5260  | 280 | IPI00007074 | 29,4 | 29,4 | VSYYENVIK                   | 9  | 557,79 | 1113,5688 |
| 14237 | 280 | IPI00007074 | 40,2 | 40,2 | APWELLELR                   | 9  | 563,82 | 1125,6169 |
| 8170  | 281 | IPI00030179 | 40,3 | 40,3 | IALTDNALIAR                 | 11 | 585,84 | 1169,6749 |
| 13944 | 282 | IPI00646240 | 41,8 | 41,8 | (M)GI(M)NSFVNDIFER          | 14 | 852,89 | 1703,7637 |
| 9321  | 283 | IPI00009865 | 53,1 | 53,1 | GSLGGGFSSGGFSGGSFSR         | 19 | 854,39 | 1706,764  |
| 8553  | 284 | IPI00299000 | 41   | 41   | ITSGPFEPDLYK                | 12 | 683,85 | 1365,6812 |
| 10834 | 285 | IPI00219446 | 52,1 | 52,1 | LYTLVLTDPDAPSR              | 14 | 780,92 | 1559,8185 |
| 9023  | 286 | IPI00014238 | 52   | 52   | LPETNLFETEETR               | 13 | 789,89 | 1577,7559 |
| 10142 | 288 | IPI00008494 | 31,1 | 31,1 | LLGIETPLPK                  | 10 | 540,84 | 1079,6584 |
| 12487 | 288 | IPI00008494 | 44,2 | 44,2 | VELAPLPSWQPVGK              | 14 | 760,93 | 1519,8384 |
| 6163  | 289 | IPI00010740 | 29,1 | 29,1 | YGEPGEVFINK                 | 11 | 626,81 | 1251,6124 |
| 15542 | 289 | IPI00010740 | 49,9 | 49,9 | LFVGNLPADITEDEFK            | 16 | 904,46 | 1806,9023 |
| 5575  | 290 | IPI00026964 | 51,5 | 51,5 | VPDFSEYR                    | 8  | 506,74 | 1011,4642 |
| 17189 | 291 | IPI00792029 | 51,4 | 51,4 | YYALCGFGGVLSCGLTHTAVVPLDLVK | 27 | 970,83 | 2909,468  |
| 3767  | 292 | IPI00219678 | 47   | 47   | GVFNVQ(M)EPK                | 10 | 582,79 | 1163,5627 |
| 11442 | 293 | IPI00026087 | 33,5 | 33,5 | PVGLAGIGEVLGK               | 14 | 648,88 | 1295,7433 |

|       |     |             |      |      |                            |    |         |           |
|-------|-----|-------------|------|------|----------------------------|----|---------|-----------|
| 14392 | 293 | IPI00026087 | 44,8 | 44,8 | DFVAEP(M)GEKPVGSLAGIGEVLGK | 24 | 806,09  | 2415,2339 |
| 17434 | 294 | IPI00329745 | 51,1 | 51,1 | PVTDFFLQLVDAGK             | 14 | 775,41  | 1548,8112 |
| 11344 | 295 | IPI00291510 | 51   | 51   | NLIDAGVDALR                | 11 | 578,82  | 1155,6234 |
| 7303  | 296 | IPI00011201 | 50,5 | 50,5 | ALTSQLTDEELAQGR            | 15 | 816,42  | 1630,816  |
| 14124 | 297 | IPI00306516 | 50,5 | 50,5 | VTDLLGGLFSK                | 11 | 575,33  | 1148,6436 |
| 4333  | 299 | IPI00420108 | 29,5 | 29,5 | EAVTFLR                    | 7  | 418,24  | 834,4587  |
| 6475  | 299 | IPI00420108 | 48   | 48   | TPAFAESVTEGDVR             | 14 | 739,86  | 1477,705  |
| 12317 | 300 | IPI00299155 | 43,8 | 43,8 | LLDEVFFSEK                 | 10 | 613,82  | 1225,6213 |
| 8560  | 302 | IPI00396435 | 49,3 | 49,3 | VESLLVTAISK                | 11 | 580,35  | 1158,6842 |
| 14574 | 303 | IPI00026216 | 48,3 | 48,3 | VLGATLLPDLIQK              | 13 | 690,93  | 1379,8376 |
| 14602 | 304 | IPI00012074 | 43   | 43   | NLATTVTEEILEK              | 13 | 730,90  | 1459,7761 |
| 13557 | 306 | IPI00010154 | 47,8 | 47,8 | NPYYGGESSITPLEELYK         | 19 | 1074,01 | 2146,0073 |
| 13284 | 307 | IPI00478292 | 47,6 | 47,6 | DLIGVQNLLK                 | 10 | 556,84  | 1111,6584 |
| 12977 | 308 | IPI00218236 | 46,3 | 46,3 | YPENFFLLR                  | 9  | 599,82  | 1197,6172 |
| 7650  | 310 | IPI00009104 | 47,3 | 47,3 | LLIVSTTPYSEK               | 12 | 675,88  | 1349,7437 |
| 16272 | 311 | IPI00013415 | 43,2 | 43,2 | AHIFVPVPQLK                | 12 | 669,43  | 1336,8481 |
| 14829 | 312 | IPI00296053 | 35,6 | 35,6 | THTQDAVPLTLGQEFSGYVQQVK    | 23 | 849,43  | 2545,2822 |
| 4158  | 313 | IPI00297579 | 43,5 | 43,5 | LTWHSCPEDEAQ               | 12 | 736,81  | 1471,6003 |
| 5123  | 313 | IPI00297579 | 32,8 | 32,8 | KVEEAEPEEFVVEK             | 14 | 554,61  | 1660,8169 |
| 14967 | 314 | IPI00219622 | 43,8 | 43,8 | LAQQYYLVYQEPIPTAQLVQR      | 21 | 841,12  | 2520,3396 |
| 4163  | 315 | IPI00550021 | 36,9 | 36,9 | HGSLGFLPR                  | 9  | 492,27  | 982,5334  |
| 3802  | 316 | IPI00217030 | 44,8 | 44,8 | LTGVFAPR                   | 8  | 430,75  | 859,4899  |
| 15087 | 317 | IPI00012102 | 42   | 42   | WQTLLSVDDLVEK              | 13 | 773,41  | 1544,8081 |
| 16859 | 318 | IPI00004656 | 44,8 | 44,8 | SNFLNCYVSGFHPSDIEVDLLK     | 22 | 852,08  | 2553,2195 |
| 8275  | 319 | IPI00217975 | 38,2 | 38,2 | IESLSSQLSNLQK              | 13 | 723,89  | 1445,7692 |
| 6055  | 320 | IPI00005537 | 31,5 | 31,5 | LVESLPQEIK                 | 10 | 578,33  | 1154,6522 |
| 17714 | 321 | IPI00027442 | 44,3 | 44,3 | NVGCLQEALQLATSFAQLR        | 19 | 707,03  | 2118,0825 |
| 8785  | 322 | IPI00375511 | 44,1 | 44,1 | VLNSYWVGEDSTYK             | 14 | 830,90  | 1659,7764 |
| 7685  | 323 | IPI00061178 | 43,9 | 43,9 | LFIGGLNTETNEK              | 13 | 718,37  | 1434,7344 |
| 7158  | 324 | IPI00063903 | 43,3 | 43,3 | AGPESDAQYQFTGIK            | 15 | 806,39  | 1610,7562 |

|       |     |             |      |      |                         |    |        |           |
|-------|-----|-------------|------|------|-------------------------|----|--------|-----------|
| 4488  | 325 | IPI00012345 | 43,3 | 43,3 | TNEGVIEFR               | 9  | 532,77 | 1063,5284 |
| 14984 | 328 | IPI00103994 | 43   | 43   | SFITTDVNPYYDSFVR        | 16 | 962,46 | 1922,9023 |
| 4316  | 329 | IPI00219160 | 40,3 | 40,3 | AFLIEEQK                | 8  | 489,27 | 976,5215  |
| 6963  | 330 | IPI00027252 | 42,4 | 42,4 | FNASQLITQR              | 10 | 589,32 | 1176,6249 |
| 12819 | 331 | IPI00020956 | 42,1 | 42,1 | GFSEGLWEIENNPTVK        | 16 | 910,45 | 1818,8767 |
| 8610  | 333 | IPI00000861 | 41,9 | 41,9 | GFSVVADTPELQR           | 13 | 709,87 | 1417,7175 |
| 9058  | 334 | IPI00027626 | 41,8 | 41,8 | ALQFLEEVK               | 9  | 538,80 | 1075,5902 |
| 12674 | 335 | IPI00008274 | 36,3 | 36,3 | LSDLLAPISEQIK           | 13 | 713,91 | 1425,8048 |
| 15514 | 336 | IPI00289819 | 41,6 | 41,6 | YSDNWEAITGTGDPEHYLINVCK | 23 | 894,74 | 2681,209  |
| 8520  | 337 | IPI00305383 | 41,6 | 41,6 | NALANPLYCPDYR           | 13 | 783,87 | 1565,7273 |
| 7320  | 338 | IPI00183002 | 41,2 | 41,2 | STQGVTLTDLQEAEK         | 15 | 810,41 | 1618,8054 |
| 15532 | 339 | IPI00025273 | 41,1 | 41,1 | FGDPECQVILPLLK          | 14 | 814,94 | 1627,8613 |
| 14454 | 340 | IPI00294380 | 40,9 | 40,9 | LGTPVLQALGDGDFVK        | 16 | 815,44 | 1628,875  |
| 16483 | 341 | IPI00008438 | 40,5 | 40,5 | IAIYELLFK               | 9  | 555,33 | 1108,6521 |
| 10899 | 342 | IPI00031556 | 40,5 | 40,5 | ELLTSFGPLK              | 10 | 552,82 | 1103,6207 |
| 14937 | 343 | IPI00293655 | 40,4 | 40,4 | GHVDILAPTVQELAALEK      | 18 | 635,35 | 1903,0397 |
| 5663  | 344 | IPI00005202 | 40,3 | 40,3 | GLGAGAGAGEESPATSLPR     | 19 | 849,43 | 1696,8386 |
| 17444 | 347 | IPI00216106 | 39,3 | 39,3 | IPAFLNVVDIAGLVK         | 15 | 523,65 | 1567,925  |
| 4725  | 351 | IPI00027223 | 38,9 | 38,9 | ATDFVVPGPGK             | 11 | 544,29 | 1086,5693 |
| 8630  | 353 | IPI00216085 | 38,5 | 38,5 | GGDISVCEWYQR            | 12 | 735,33 | 1468,6387 |
| 7133  | 354 | IPI00016339 | 38,5 | 38,5 | LVLLGESAVGK             | 11 | 543,33 | 1084,6476 |
| 4533  | 355 | IPI00217223 | 38,5 | 38,5 | VELLLK                  | 6  | 357,74 | 713,4669  |
| 15294 | 356 | IPI00258833 | 38,5 | 38,5 | NVELAELELK              | 11 | 635,87 | 1269,7179 |
| 10051 | 357 | IPI00550746 | 38,5 | 38,5 | GQPAIIDGELYNEVK         | 15 | 823,42 | 1644,8348 |
| 10887 | 358 | IPI00013894 | 34   | 34   | LAYINPDLALEEK           | 13 | 744,90 | 1487,7867 |
| 17774 | 359 | IPI00028109 | 38   | 38   | ERPPNPIEFLASYLLK        | 16 | 629,68 | 1886,0225 |
| 6613  | 360 | IPI00442278 | 33,1 | 33,1 | FINEVLR                 | 7  | 445,76 | 889,5007  |
| 2445  | 361 | IPI00008918 | 33,3 | 33,3 | VGVLAAAS(M)EAK          | 11 | 546,29 | 1090,5682 |
| 3840  | 362 | IPI00719633 | 37,7 | 37,7 | FSSVQLR                 | 7  | 418,73 | 835,4539  |
| 9253  | 363 | IPI00792971 | 34,4 | 34,4 | TPYTDVNIVTIR            | 12 | 696,38 | 1390,7452 |

|       |     |             |      |      |                          |    |         |           |
|-------|-----|-------------|------|------|--------------------------|----|---------|-----------|
| 16726 | 363 | IPI00792971 | 32,3 | 32,3 | ENTEGEYSGIEHVIVDGVVQSIK  | 23 | 834,75  | 2501,2275 |
| 13784 | 364 | IPI00037448 | 37,6 | 37,6 | IAAAGLDVTSPEPLPTNHPLLTLK | 24 | 823,46  | 2467,3687 |
| 7598  | 368 | IPI00419373 | 32,7 | 32,7 | WGTLTDCVV(M)R            | 11 | 677,32  | 1352,6206 |
| 8398  | 369 | IPI00789310 | 29,7 | 29,7 | SVPTSTVFYPSDGVATEK       | 18 | 942,96  | 1883,9132 |
| 7395  | 369 | IPI00789310 | 37,3 | 37,3 | TSRPENAIYNNNEDFQVGQAK    | 22 | 836,74  | 2507,2    |
| 7730  | 370 | IPI00026570 | 37,1 | 37,1 | GGVADALLYR               | 10 | 517,78  | 1033,5544 |
| 14202 | 371 | IPI00216694 | 37,6 | 37,6 | YPALTKPENQDIDWTLLEGETR   | 22 | 863,77  | 2588,2776 |
| 14687 | 372 | IPI00034319 | 35,5 | 35,5 | TQSSLVPALTDVFR           | 14 | 767,42  | 1532,8186 |
| 6520  | 374 | IPI00027397 | 36,7 | 36,7 | GSGIFDESTPVQTR           | 14 | 747,36  | 1492,7139 |
| 14319 | 376 | IPI00010153 | 36,5 | 36,5 | ISLGLPVGAVINCADNTGAK     | 20 | 985,52  | 1969,0291 |
| 5248  | 378 | IPI00243221 | 31,4 | 31,4 | IFEEIR                   | 6  | 403,72  | 805,4323  |
| 7893  | 380 | IPI00641950 | 36,9 | 36,9 | LWDLTTGTTTR              | 11 | 632,83  | 1263,6444 |
| 14924 | 382 | IPI00018522 | 36,3 | 36,3 | WLAPDGLIFPDR             | 12 | 700,37  | 1398,7286 |
| 16125 | 383 | IPI00009790 | 36,2 | 36,2 | EIGWTDVGGWTGQGGSSILGTK   | 21 | 1060,03 | 2118,0381 |
| 3917  | 384 | IPI00219155 | 53,3 | 53,3 | VTAIDFR                  | 7  | 411,23  | 820,4431  |
| 7528  | 384 | IPI00219155 | 34,4 | 34,4 | YSVDIPLDK                | 9  | 525,28  | 1048,5421 |
| 10902 | 385 | IPI00007402 | 35,9 | 35,9 | FAVGVQQVLLK              | 12 | 636,89  | 1271,7582 |
| 4328  | 387 | IPI00017448 | 34,2 | 34,2 | TYAICGAIR                | 9  | 512,77  | 1023,5156 |
| 6425  | 388 | IPI00017855 | 35,3 | 35,3 | SQFTITPGSEQIR            | 13 | 732,38  | 1462,7385 |
| 13587 | 390 | IPI00022442 | 39,7 | 39,7 | L(M)CPQEIVDYIADK         | 14 | 855,91  | 1709,7999 |
| 3507  | 391 | IPI00001757 | 35,2 | 35,2 | FAEYGEIK                 | 8  | 478,74  | 955,4635  |
| 11664 | 392 | IPI00220834 | 30,5 | 30,5 | SQLDIIIHSLK              | 11 | 422,92  | 1265,7328 |
| 13444 | 393 | IPI00744848 | 34   | 34   | APFLEVAER                | 9  | 516,28  | 1030,5435 |
| 7485  | 395 | IPI00021840 | 34,9 | 34,9 | LNISFPATGCQK             | 12 | 668,34  | 1334,6625 |
| 14164 | 396 | IPI00029468 | 34,9 | 34,9 | DQLQTFSEEHPVLLTEAPLNPR   | 22 | 845,43  | 2533,2808 |
| 5560  | 397 | IPI00141318 | 30   | 30   | LALQALTEK                | 9  | 493,80  | 985,5797  |
| 7813  | 397 | IPI00141318 | 29,4 | 29,4 | SVGELPSTVESLQK           | 14 | 737,39  | 1472,7693 |
| 14894 | 398 | IPI00794404 | 34,8 | 34,8 | TIAIIAEGIPEALTR          | 15 | 784,46  | 1566,8967 |
| 4065  | 399 | IPI00718917 | 34,7 | 34,7 | VGDVYIPR                 | 8  | 459,76  | 917,4954  |
| 17539 | 400 | IPI00550364 | 34,7 | 34,7 | ELNELVSAIEEHFFQPQK       | 18 | 720,03  | 2157,0664 |

|       |     |             |      |      |                             |    |        |           |
|-------|-----|-------------|------|------|-----------------------------|----|--------|-----------|
| 2755  | 401 | IPI00031131 | 34,5 | 34,5 | LFSQETV(M)K                 | 9  | 549,78 | 1097,5426 |
| 13632 | 402 | IPI00028004 | 32,9 | 32,9 | FGPYYTEPVIAGLDPK            | 16 | 883,95 | 1765,8907 |
| 7835  | 403 | IPI00221088 | 34,2 | 34,2 | LFEGNALLR                   | 9  | 516,80 | 1031,5764 |
| 8838  | 404 | IPI00015911 | 34   | 34   | NETLGGTCLNVGCIPSK           | 17 | 910,44 | 1818,861  |
| 4393  | 406 | IPI00072377 | 33,9 | 33,9 | LNEQASEEILK                 | 11 | 637,33 | 1272,6548 |
| 17374 | 407 | IPI00643920 | 30,5 | 30,5 | N(M)AEQIIQEIYSQIQSK         | 17 | 680,34 | 2037,9988 |
| 4338  | 408 | IPI00029623 | 33,5 | 33,5 | HITIFSPEGR                  | 10 | 578,81 | 1155,6024 |
| 2800  | 409 | IPI00220797 | 33,3 | 33,3 | PGGSDFL(M)K                 | 9  | 484,23 | 966,4462  |
| 3697  | 410 | IPI00010182 | 33,3 | 33,3 | PG(M)LDFTGK                 | 9  | 491,24 | 980,4624  |
| 8603  | 411 | IPI00075248 | 32,2 | 32,2 | EAFSLFDK                    | 8  | 478,74 | 955,4636  |
| 10587 | 412 | IPI00215790 | 33,1 | 33,1 | YLYTLVITDK                  | 10 | 614,84 | 1227,674  |
| 2805  | 413 | IPI00005161 | 33   | 33   | VF(M)QEFK                   | 7  | 472,73 | 943,4463  |
| 7945  | 414 | IPI00171199 | 32,5 | 32,5 | SNFGYNIPLK                  | 10 | 576,81 | 1151,5959 |
| 2997  | 415 | IPI00453476 | 32,4 | 32,4 | HGESAWNLENR                 | 11 | 438,21 | 1311,5944 |
| 3862  | 416 | IPI00014845 | 32   | 32   | LLFPR                       | 5  | 323,21 | 644,4001  |
| 15967 | 416 | IPI00014845 | 56   | 56   | YFLVGAGAIGCELLK             | 15 | 805,93 | 1609,8531 |
| 16526 | 418 | IPI00165393 | 32   | 32   | KLELSDNIISGGLEVLAEK         | 19 | 676,71 | 2027,1136 |
| 13204 | 421 | IPI00028031 | 31,6 | 31,6 | AGLGSGLSLSGLVHPELSR         | 19 | 617,34 | 1849,0034 |
| 9706  | 422 | IPI00026328 | 31,5 | 31,5 | ILFLDPSGK                   | 9  | 495,29 | 988,5581  |
| 6340  | 423 | IPI00006395 | 29,5 | 29,5 | LLLLGAGESGK                 | 11 | 529,32 | 1056,6165 |
| 2985  | 425 | IPI00010105 | 31,4 | 31,4 | LNEAQPSTIATS(M)R            | 14 | 767,88 | 1533,7439 |
| 8695  | 426 | IPI00003406 | 31,4 | 31,4 | LAASGEGGLQELSGHFENQK        | 20 | 691,34 | 2070,9956 |
| 4391  | 427 | IPI00024282 | 35,8 | 35,8 | FEVIEKPQA                   | 9  | 530,79 | 1059,5585 |
| 4985  | 430 | IPI00216237 | 31,2 | 31,2 | EVCGFAPYER                  | 10 | 614,28 | 1226,5371 |
| 13072 | 431 | IPI00246058 | 31,2 | 31,2 | SVIEQGGIQTVDQLIK            | 16 | 864,48 | 1726,947  |
| 5270  | 432 | IPI00031812 | 31,1 | 31,1 | RPQYSNPPVQGEVMEGADNQGAGEQGR | 27 | 957,77 | 2870,2976 |
| 16315 | 433 | IPI00013452 | 31,1 | 31,1 | LSSCDSFTSTINELNHCLSLR       | 21 | 818,72 | 2453,1335 |
| 16966 | 434 | IPI00384051 | 30,7 | 30,7 | AFYAELYHISSNLEK             | 16 | 633,33 | 1896,958  |
| 14932 | 435 | IPI00009305 | 30,7 | 30,7 | YFTLGLPTGSTPLGKYK           | 17 | 937,97 | 1873,9265 |
| 7710  | 436 | IPI00217236 | 30,6 | 30,6 | LEAAYLDLQR                  | 10 | 596,32 | 1190,6277 |

|       |     |             |      |      |                      |    |        |           |
|-------|-----|-------------|------|------|----------------------|----|--------|-----------|
| 5273  | 437 | IPI00216951 | 30,5 | 30,5 | GFVEIQTPK            | 9  | 509,78 | 1017,5481 |
| 13604 | 438 | IPI00412545 | 30,4 | 30,4 | ILDVLEEIPK           | 10 | 584,84 | 1167,6737 |
| 16426 | 439 | IPI00022314 | 30,3 | 30,3 | AIWNVINWENVTER       | 14 | 872,44 | 1742,8724 |
| 10907 | 441 | IPI00021187 | 30,3 | 30,3 | EACGVIVELIK          | 11 | 615,84 | 1229,6674 |
| 3315  | 446 | IPI00015842 | 29,8 | 29,8 | EQFNEFR              | 7  | 485,22 | 968,4332  |
| 7955  | 449 | IPI00217561 | 29,5 | 29,5 | IGFGSFVEK            | 9  | 492,26 | 982,5113  |
| 4273  | 451 | IPI00024911 | 29,1 | 29,1 | FDTQYPYGEK           | 10 | 624,28 | 1246,5494 |
| 3177  | 501 | IPI00023283 | 40,2 | 40,2 | TPEFLR               | 6  | 381,71 | 761,4058  |
| 5498  | 501 | IPI00023283 | 51,2 | 51,2 | GDFCIQVGR            | 9  | 526,25 | 1050,4897 |
| 12227 | 501 | IPI00023283 | 90,1 | 90,1 | NIEDVIAQGIGK         | 12 | 628,85 | 1255,6761 |
| 12512 | 510 | IPI00386119 | 91,1 | 91,1 | AAVEEGIVLGGGCALLR    | 17 | 842,96 | 1683,8973 |
| 5773  | 519 | IPI00025091 | 49,5 | 49,5 | TIAQDYGVLK           | 10 | 554,30 | 1106,5952 |
| 4770  | 520 | IPI00745518 | 80   | 80   | ESTLHLVLR            | 9  | 534,31 | 1066,6115 |
| 13247 | 542 | IPI00003949 | 29   | 29   | YFHVVIAGPQDSPFEGGTFK | 20 | 732,70 | 2195,0654 |
| 2620  | 544 | IPI00005614 | 37,6 | 37,6 | VNFA(M)NVGK          | 9  | 498,25 | 994,489   |
| 15557 | 544 | IPI00005614 | 30   | 30   | HQILEQAVEDYAETVHQLSK | 20 | 780,06 | 2337,1587 |
| 2585  | 545 | IPI00307684 | 30,9 | 30,9 | HFVG(M)LPEK          | 9  | 537,28 | 1072,5363 |
| 13654 | 555 | IPI00556589 | 29,1 | 29,1 | EGDVLTLLESER         | 12 | 680,85 | 1359,6863 |
| 6373  | 561 | IPI00167762 | 62,6 | 62,6 | LADALQELR            | 9  | 514,79 | 1027,5647 |
| 15907 | 566 | IPI00220167 | 42,1 | 42,1 | LGTLSALDILIK         | 12 | 628,89 | 1255,7743 |
| 5955  | 571 | IPI00247295 | 64,6 | 64,6 | DLTTAGAVTQCYR        | 13 | 728,35 | 1454,6803 |

## Suppl Table 2: August High LET Peptides



| Scan# | IPI000000#  | Score# | Top score Sequence         | Pep.Lengt | m/z     | Neutral mass (exp) |
|-------|-------------|--------|----------------------------|-----------|---------|--------------------|
| 3792  | IPI00418471 | 56,8   | 56,8 TYSLGSALR             | 9         | 484,26  | 966,51             |
| 3443  | IPI00418471 | 53,7   | 53,7 DNLAEDI(M)R           | 9         | 546,75  | 1091,49            |
| 2820  | IPI00418471 | 46,1   | 46,1 FADLSEAANR            | 10        | 547,27  | 1092,52            |
| 6323  | IPI00418471 | 64,8   | 64,8 EYQDLLNVK             | 9         | 561,30  | 1120,58            |
| 12336 | IPI00418471 | 90,9   | 90,9 ILLAELEQLK            | 10        | 585,36  | 1168,71            |
| 3198  | IPI00418471 | 60,3   | 60,3 LGDLYEEE(M)R          | 10        | 635,78  | 1269,55            |
| 6210  | IPI00418471 | 62     | 62 NLQEAEWYK               | 10        | 655,31  | 1308,60            |
| 9286  | IPI00418471 | 74,1   | 74,1 (M)ALDIEIATYR         | 11        | 656,33  | 1310,65            |
| 4090  | IPI00418471 | 60,3   | 60,3 EEAENTLQSF            | 11        | 662,31  | 1322,61            |
| 13149 | IPI00418471 | 96,7   | 96,7 VESLQEEIAFLK          | 12        | 703,38  | 1404,75            |
| 4188  | IPI00418471 | 44,3   | 44,3 SLYASSPGGVYATR        | 14        | 714,86  | 1427,71            |
| 7343  | IPI00418471 | 66,8   | 66,8 QVQSLTCEVDALK         | 13        | 745,88  | 1489,74            |
| 10156 | IPI00418471 | 76,1   | 76,1 KVESLQEEIAFLK         | 13        | 767,43  | 1532,85            |
| 17591 | IPI00418471 | 37,5   | 37,5 ISLPLPNFSSLNLR        | 14        | 524,30  | 1569,89            |
| 7213  | IPI00418471 | 52     | 52 ETNLDSLPLVDTHSK         | 15        | 834,93  | 1667,84            |
| 11249 | IPI00418471 | 70,6   | 70,6 E(M)EENFAVEAANYQDTIGR | 19        | 1101,98 | 2201,95            |
| 4388  | IPI00465248 | 31,4   | 31,4 YDLDFK                | 6         | 400,69  | 799,38             |
| 2510  | IPI00465248 | 43,8   | 43,8 SCNCLLLK              | 8         | 504,25  | 1006,49            |
| 9149  | IPI00465248 | 65,6   | 65,6 GNPTVEVDLFTSK         | 13        | 703,86  | 1405,71            |
| 12124 | IPI00465248 | 53,5   | 53,5 YISPDQLADLYK          | 12        | 713,37  | 1424,72            |
| 12604 | IPI00465248 | 91,2   | 91,2 VVIG(M)DVAASEFFR      | 14        | 778,89  | 1555,77            |
| 5993  | IPI00465248 | 90,9   | 90,9 VNQIGSVTESLQACK       | 15        | 817,41  | 1632,81            |
| 13094 | IPI00465248 | 75,5   | 75,5 AAVPSGASTGIYEALR      | 18        | 902,98  | 1803,94            |
| 14476 | IPI00465248 | 30,3   | 30,3 FTASAGIQVVGDDLTVTNPK  | 20        | 1017,03 | 2032,05            |
| 8074  | IPI00479186 | 32,2   | 32,2 GIFPVLCK              | 8         | 467,26  | 932,51             |
| 3692  | IPI00479186 | 47,8   | 47,8 GDYPLEAVR             | 9         | 510,26  | 1018,51            |
| 7002  | IPI00479186 | 50,5   | 50,5 GDLGIEIPA EK          | 11        | 571,31  | 1140,60            |
| 6153  | IPI00479186 | 64,8   | 64,8 LDIDSPITAR            | 11        | 599,33  | 1196,64            |
| 3178  | IPI00479186 | 58,5   | 58,5 ITLDNAY(M)EK          | 10        | 607,29  | 1212,57            |
| 4806  | IPI00479186 | 64,4   | 64,4 NTGIICTIGPASR         | 13        | 680,36  | 1358,70            |
| 13229 | IPI00479186 | 63,5   | 63,5 IYVDDGLISLQVK         | 13        | 731,91  | 1461,81            |

|                   |      |                                   |    |         |         |
|-------------------|------|-----------------------------------|----|---------|---------|
| 8504 IPI00479186  | 55,3 | 55,3 TATESFASDPILYR               | 14 | 785,89  | 1569,77 |
| 10944 IPI00479186 | 80,2 | 80,2 GVNLPGAAVDLPAVSEK            | 17 | 818,95  | 1635,88 |
| 8319 IPI00479186  | 66,8 | 66,8 KGVNLPGAAVDLPAVSEK           | 18 | 883,00  | 1763,98 |
| 12829 IPI00479186 | 33   | 33 GADFLVTEVENGGSLGSK             | 18 | 890,44  | 1778,87 |
| 15899 IPI00479186 | 91,6 | 91,6 LAPITSDPTEATAVGAVEASFK       | 22 | 1088,06 | 2174,11 |
| 2908 IPI00021439  | 32,4 | 32,4 GILTLK                       | 6  | 322,72  | 643,43  |
| 6418 IPI00021439  | 49,6 | 49,6 AVFPSIVGR                    | 9  | 473,28  | 944,54  |
| 8164 IPI00021439  | 34,2 | 34,2 DLTDYL(M)K                   | 8  | 507,74  | 1013,47 |
| 2628 IPI00021439  | 55,5 | 55,5 GYSFTTTAER                   | 10 | 566,77  | 1131,52 |
| 2333 IPI00021439  | 46,9 | 46,9 EITALAPST(M)K                | 11 | 589,31  | 1176,60 |
| 12479 IPI00021439 | 69   | 69 SYELPDGQVITIGNER               | 16 | 895,95  | 1789,89 |
| 7453 IPI00021439  | 62,9 | 62,9 VAPEEHPVLLTEAPLNPK           | 18 | 977,54  | 1953,06 |
| 13424 IPI00021439 | 96,1 | 96,1 DLYANTVLSGGTT(M)YPGIADR      | 21 | 1116,04 | 2230,06 |
| 4248 IPI00478539  | 40,7 | 40,7 DYFEQYGK                     | 8  | 525,23  | 1048,45 |
| 2713 IPI00478539  | 46,6 | 46,6 GTLTDCVV(M)R                 | 10 | 584,28  | 1166,54 |
| 6230 IPI00478539  | 49,6 | 49,6 IEVIEI(M)TDR                 | 10 | 617,82  | 1233,63 |
| 3138 IPI00478539  | 65   | 65 SSGPYGGGGQYFAK                 | 14 | 688,32  | 1374,62 |
| 10589 IPI00478539 | 49,3 | 49,3 GFAFVTFDDHDSVDK              | 15 | 850,38  | 1698,75 |
| 16359 IPI00478539 | 85,8 | 85,8 LFIGGLSFETTDESLR             | 16 | 892,96  | 1783,90 |
| 3707 IPI00472102  | 64,1 | 64,1 VGLQVVAVK                    | 9  | 456,80  | 911,58  |
| 5299 IPI00472102  | 39,9 | 39,9 EIGNIISDA(M)K                | 11 | 603,81  | 1205,60 |
| 12629 IPI00472102 | 85,1 | 85,1 TLNDELEIIEG(M)K              | 13 | 760,88  | 1519,74 |
| 12226 IPI00472102 | 72   | 72 AAVEEGIVLGGGCALLR              | 17 | 842,96  | 1683,90 |
| 13084 IPI00472102 | 38,5 | 38,5 ISSIQSIVPALEIANAHR           | 18 | 640,36  | 1918,06 |
| 18354 IPI00472102 | 48,1 | 48,1 AL(M)LQGVDLLADAVAVT(M)GPK    | 21 | 715,71  | 2144,11 |
| 20116 IPI00472102 | 45,3 | 45,3 TALLDAAGVASLLTTAEVVVTEIPK    | 25 | 828,14  | 2481,39 |
| 7654 IPI00472102  | 97,2 | 97,2 LVQDVANNTNEEAGDGTTTATVLR     | 25 | 1280,63 | 2559,24 |
| 19669 IPI00472102 | 54,3 | 54,3 TALLDAAGVASLLTTAEVVVTEIPKEEK | 28 | 956,86  | 2867,57 |
| 7586 IPI00302592  | 58,9 | 58,9 LDVQFSGLTK                   | 10 | 554,31  | 1106,60 |
| 17071 IPI00302592 | 71,5 | 71,5 LIALLEVLSQK                  | 11 | 613,89  | 1225,76 |
| 5362 IPI00302592  | 63,8 | 63,8 LTVSSLQESGLK                 | 12 | 631,35  | 1260,69 |
| 2983 IPI00302592  | 82,8 | 82,8 AFGPGLQGGASAGSPAR            | 16 | 715,36  | 1428,71 |

|                   |      |      |                                  |    |         |         |
|-------------------|------|------|----------------------------------|----|---------|---------|
| 8726 IPI00302592  | 30,7 | 30,7 | DAGEGGLSLAIEGPSK                 | 16 | 750,88  | 1499,75 |
| 5377 IPI00302592  | 80,8 | 80,8 | GAGTGGLGLAVEGPSEAK               | 18 | 785,91  | 1569,80 |
| 5224 IPI00302592  | 83,7 | 83,7 | VANPSGNLTETYVQDR                 | 16 | 882,43  | 1762,85 |
| 7268 IPI00302592  | 94,4 | 94,4 | VQVQDNEGCPVEALVK                 | 16 | 892,94  | 1783,87 |
| 11114 IPI00302592 | 37,6 | 37,6 | VTYCPTEPGNYIINIK                 | 16 | 941,48  | 1880,94 |
| 12876 IPI00302592 | 36,3 | 36,3 | EGPYSISVLYGDEEVPR                | 17 | 955,46  | 1908,91 |
| 8856 IPI00302592  | 44,5 | 44,5 | IPEISIQD(M)TAQVTSPSGK            | 19 | 1009,51 | 2017,01 |
| 10436 IPI00302592 | 56,6 | 56,6 | YTPVQQGPVGVNVTYGGDPIPK           | 22 | 1143,59 | 2285,17 |
| 7258 IPI00302592  | 29,8 | 29,8 | SAGQGEVLVYVEDPAGHQEEAK           | 22 | 771,71  | 2312,09 |
| 15849 IPI00302592 | 69,8 | 69,8 | ASGPGLNTTGVPASLPVEFTIDAK         | 24 | 1171,61 | 2341,21 |
| 10316 IPI00302592 | 40   | 40   | VSGQGLHEGHTFEPAEFIIDTR           | 22 | 814,07  | 2439,18 |
| 14054 IPI00302592 | 37,1 | 37,1 | LQVEPAVDTSQVQCYGPGIEGQGVFR       | 26 | 921,78  | 2762,33 |
| 13994 IPI00302592 | 29,4 | 29,4 | FGGEHVPNSPFQVTALAGDQPSVQPPLR     | 28 | 982,50  | 2944,49 |
| 17379 IPI00302592 | 60,9 | 60,9 | EEGPYEVEVTYDGVVPGSPFPLEAVAPTKPSK | 33 | 1162,58 | 3484,72 |
| 8826 IPI00003865  | 38,2 | 38,2 | FELTGIPPAPR                      | 11 | 599,34  | 1196,66 |
| 9954 IPI00003865  | 61,8 | 61,8 | DAGTIAGLNVLR                     | 12 | 600,34  | 1198,67 |
| 11136 IPI00003865 | 61,5 | 61,5 | FEELNADLFR                       | 10 | 627,31  | 1252,61 |
| 4451 IPI00003865  | 65,4 | 65,4 | SQIHDIIVLVGGSTR                  | 14 | 741,41  | 1480,80 |
| 5805 IPI00003865  | 86,3 | 86,3 | TTPSYVAFTDTER                    | 13 | 744,35  | 1486,69 |
| 10111 IPI00003865 | 65,1 | 65,1 | SFYPEEVSS(M)VLTK                 | 14 | 816,90  | 1631,78 |
| 11074 IPI00003865 | 87,7 | 87,7 | IINEPTAAAIAYGLDK                 | 16 | 830,45  | 1658,89 |
| 4125 IPI00003865  | 70,1 | 70,1 | NQVA(M)NPTNTVFDK                 | 15 | 833,40  | 1664,78 |
| 10734 IPI00003865 | 44,3 | 44,3 | TVTNAVVTVPAYFNDSQR               | 18 | 991,50  | 1980,99 |
| 18016 IPI00003865 | 72,4 | 72,4 | SINPDEAVAYGAAVQAAILSGDK          | 23 | 1130,58 | 2259,14 |
| 4581 IPI00396485  | 58,9 | 58,9 | LPLQDVYK                         | 8  | 488,28  | 974,54  |
| 3997 IPI00396485  | 55   | 55   | IGGIGTVPVGR                      | 11 | 513,31  | 1024,60 |
| 3438 IPI00396485  | 66   | 66   | SGDAAIVD(M)VPGK                  | 13 | 638,32  | 1274,62 |
| 5614 IPI00396485  | 73,8 | 73,8 | YYVTIIDAPGHR                     | 12 | 702,87  | 1403,72 |
| 9154 IPI00396485  | 72,2 | 72,2 | P(M)CVESFSDYPPLGR                | 15 | 885,90  | 1769,78 |
| 12514 IPI00396485 | 31   | 31   | VETGVLKPG(M)VVTFAPVNVTTTEVK      | 24 | 844,46  | 2530,37 |
| 18314 IPI00396485 | 51,7 | 51,7 | DGNASGTTLLEALDCILPPTTRPTDK       | 25 | 885,78  | 2654,31 |
| 17306 IPI00396485 | 32,7 | 32,7 | KDGNASGTTLLEALDCILPPTTRPTDK      | 26 | 928,48  | 2782,41 |

|                   |      |                                       |    |         |         |
|-------------------|------|---------------------------------------|----|---------|---------|
| 19954 IPI00396485 | 31,2 | 31,2 N(M)ITGTSQADCAVLIVAAGVGEFEAGISK  | 29 | 975,81  | 2924,42 |
| 17936 IPI00396485 | 96,9 | 96,9 DGNASGTTLLEALDCILPPTTRPTDKPLR    | 28 | 1007,86 | 3020,56 |
| 12931 IPI00396485 | 39,3 | 39,3 SGDAAIVD(M)VPGKP(M)CVESFSDYPPLGR | 28 | 1009,80 | 3026,38 |
| 5845 IPI00011654  | 29,8 | 29,8 FPGQLNADLR                       | 10 | 565,80  | 1129,59 |
| 3273 IPI00011654  | 52,9 | 52,9 ISVYYNEATGGK                     | 12 | 651,32  | 1300,63 |
| 9424 IPI00011654  | 32,3 | 32,3 AILVDLEPGT(M)DSVR                | 15 | 816,42  | 1630,82 |
| 14839 IPI00011654 | 45,1 | 45,1 ALTVPELTQQVFDK                   | 15 | 830,45  | 1658,89 |
| 13669 IPI00011654 | 52   | 52 NSSYFVEWIPNNVK                     | 14 | 848,92  | 1695,82 |
| 17294 IPI00011654 | 51,6 | 51,6 (M)AVTFIGNSTAIQELFK              | 17 | 943,49  | 1884,96 |
| 16901 IPI00011654 | 93,4 | 93,4 GHYTEGAELVDSVLDVVR               | 18 | 980,00  | 1957,98 |
| 16441 IPI00011654 | 48,6 | 48,6 LTTPTYGDLNHLVSAT(M)SGVTTCLR      | 25 | 908,78  | 2723,33 |
| 7844 IPI00334775  | 31,4 | 31,4 ALLFIPR                          | 7  | 415,27  | 828,52  |
| 9714 IPI00334775  | 58,8 | 58,8 APFDLFENK                        | 9  | 540,77  | 1079,53 |
| 3617 IPI00334775  | 62,5 | 62,5 SIYYITGESK                       | 10 | 580,79  | 1159,58 |
| 5933 IPI00334775  | 33,8 | 33,8 IDIIPNPQER                       | 10 | 597,83  | 1193,64 |
| 7646 IPI00334775  | 42,1 | 42,1 RAPFDLFENK                       | 10 | 618,82  | 1235,63 |
| 8819 IPI00334775  | 79,5 | 79,5 ADLNNLGTIAK                      | 12 | 621,86  | 1241,70 |
| 10434 IPI00334775 | 66   | 66 GVVDESEDIPLNLSR                    | 14 | 757,40  | 1512,78 |
| 10434 IPI00334775 | 66   | 66 GVVDESEDLPLNISR                    | 14 | 757,40  | 1512,78 |
| 6603 IPI00334775  | 54,7 | 54,7 HLEINPDHPIVETLR                  | 15 | 594,99  | 1781,94 |
| 13609 IPI00334775 | 36,1 | 36,1 HSQFIGYPITLYLEK                  | 15 | 603,66  | 1807,95 |
| 9384 IPI00334775  | 68,3 | 68,3 NPDDITQEEYGEFYK                  | 15 | 924,40  | 1846,79 |
| 14791 IPI00334775 | 69,1 | 69,1 GFEVVY(M)TEPIDEYCVQQLK           | 20 | 1232,57 | 2463,13 |
| 3772 IPI00387144  | 35,4 | 35,4 FDL(M)YAK                        | 7  | 452,22  | 902,42  |
| 13404 IPI00387144 | 61,2 | 61,2 EIIDLVLDR                        | 9  | 543,31  | 1084,61 |
| 14379 IPI00387144 | 57,2 | 57,2 SIQFVDWCPTGFK                    | 13 | 792,88  | 1583,74 |
| 15489 IPI00387144 | 97,5 | 97,5 AVFVDLEPTVIDEVR                  | 15 | 851,46  | 1700,90 |
| 11984 IPI00387144 | 48,2 | 48,2 IHFPLATYAPVISA EK                | 16 | 878,99  | 1755,96 |
| 13584 IPI00387144 | 69,7 | 69,7 TIGGGDDSFNTFFSETGAGK             | 20 | 1004,45 | 2006,88 |
| 14459 IPI00180675 | 59,2 | 59,2 TIQFVDWCPTGFK                    | 13 | 799,89  | 1597,76 |
| 16064 IPI00013475 | 43,1 | 43,1 (M)ASTFIGNSTAIQELFK              | 17 | 937,47  | 1872,93 |
| 16064 IPI00013475 | 43,1 | 43,1 (M)SATFIGNSTAIQELFK              | 17 | 937,47  | 1872,93 |

|                   |      |                               |    |        |         |
|-------------------|------|-------------------------------|----|--------|---------|
| 16064 IPI00013475 | 43,1 | 43,1 MSSTFIGNSTAIQELFK        | 17 | 937,47 | 1872,93 |
| 7859 IPI00453473  | 46,4 | 46,4 VFLENVIR                 | 8  | 495,29 | 988,57  |
| 4706 IPI00453473  | 77,4 | 77,4 ISGLIYEETR               | 10 | 590,81 | 1179,61 |
| 13031 IPI00453473 | 31,9 | 31,9 TVTAMDVVYALK             | 12 | 655,85 | 1309,70 |
| 9354 IPI00453473  | 90,6 | 90,6 TVTA(M)DVVYALK           | 12 | 663,85 | 1325,69 |
| 6897 IPI00007765  | 84,5 | 84,5 VQQTVDLFR                | 11 | 645,84 | 1289,67 |
| 14479 IPI00007765 | 82,9 | 82,9 AQFEGIVTDLIR             | 12 | 681,37 | 1360,73 |
| 9374 IPI00007765  | 51,9 | 51,9 SDIGEVILVGG(M)TR         | 14 | 731,88 | 1461,75 |
| 10644 IPI00007765 | 83,9 | 83,9 VINEPTAAALAYGLDK         | 16 | 823,44 | 1644,87 |
| 5838 IPI00303476  | 48,9 | 48,9 IGLFGGAGVGK              | 11 | 488,28 | 974,55  |
| 5319 IPI00303476  | 35,8 | 35,8 I(M)NVIGEPIDER           | 12 | 701,36 | 1400,70 |
| 10054 IPI00303476 | 72,3 | 72,3 FTQAGSEVSALLGR           | 14 | 718,38 | 1434,75 |
| 14841 IPI00303476 | 76,3 | 76,3 VALTGLTVAEYFR            | 13 | 720,40 | 1438,78 |
| 15514 IPI00303476 | 62,3 | 62,3 TVLI(M)ELINNVAK          | 13 | 737,42 | 1472,82 |
| 15456 IPI00303476 | 55,5 | 55,5 AIAELGIYPAVDPLDSTSR      | 19 | 994,52 | 1987,02 |
| 7165 IPI00418169  | 75,3 | 75,3 DALNIETAIK               | 10 | 544,30 | 1086,59 |
| 11344 IPI00418169 | 33,6 | 33,6 SEIDLFNIR                | 9  | 553,80 | 1105,58 |
| 7323 IPI00418169  | 69,9 | 69,9 SLYYYIQQDTK              | 11 | 711,35 | 1420,69 |
| 9056 IPI00418169  | 42,3 | 42,3 SYSPYD(M)LESIR           | 12 | 738,84 | 1475,66 |
| 16724 IPI00418169 | 73,7 | 73,7 GVDEVTIVNILTNR           | 14 | 771,93 | 1541,84 |
| 17971 IPI00418169 | 61,4 | 61,4 SALSGHLETVILGLLK         | 16 | 825,99 | 1649,97 |
| 17311 IPI00418169 | 63   | 63 GLGTDEDSLIEIICSR           | 16 | 889,44 | 1776,86 |
| 18786 IPI00418169 | 51,2 | 51,2 GDLENAFLNLVQCIQNK        | 17 | 659,33 | 1974,98 |
| 9539 IPI00418169  | 40,4 | 40,4 RAEDGSVIDYELIDQDAR       | 18 | 689,00 | 2063,98 |
| 18969 IPI00418169 | 65,8 | 65,8 GDLENAFLNLVQCIQNKPLYFADR | 24 | 946,81 | 2837,41 |
| 5122 IPI00003362  | 64,5 | 64,5 DAGTIAGLNV(M)R           | 12 | 617,32 | 1232,62 |
| 10214 IPI00003362 | 46   | 46 FEELN(M)DLFR               | 10 | 665,31 | 1328,61 |
| 10754 IPI00003362 | 72,2 | 72,2 ELEEIVQPIISK             | 12 | 699,40 | 1396,78 |
| 7574 IPI00003362  | 72   | 72 ITPSYVAFTPEGER             | 14 | 783,89 | 1565,77 |
| 5918 IPI00003362  | 91,5 | 91,5 NQLTSNPENTVFDK           | 15 | 839,41 | 1676,80 |
| 7208 IPI00003362  | 64,7 | 64,7 SQIFSTASDNQPTVTIK        | 17 | 918,97 | 1835,93 |
| 5487 IPI00021405  | 78,6 | 78,6 LADALQELR                | 9  | 514,79 | 1027,57 |

|                   |      |                                  |    |         |         |
|-------------------|------|----------------------------------|----|---------|---------|
| 4551 IPI00021405  | 39,6 | 39,6 TLEGELHDLR                  | 10 | 591,81  | 1181,60 |
| 9064 IPI00021405  | 39   | 39 IDLSAQLSQLQK                  | 13 | 715,90  | 1429,78 |
| 3622 IPI00021405  | 85,3 | 85,3 TALINSTGEEVA(M)R            | 14 | 754,37  | 1506,73 |
| 2473 IPI00021405  | 40,7 | 40,7 SNEDQS(M)GNWQIK             | 13 | 776,84  | 1551,66 |
| 4917 IPI00021405  | 43,8 | 43,8 SVGGSGGGSFGDNLVTR           | 17 | 783,88  | 1565,74 |
| 13766 IPI00021405 | 87,6 | 87,6 (M)QQQLDEYQELLDIK           | 15 | 955,46  | 1908,91 |
| 6020 IPI00554648  | 61,8 | 61,8 LSELEAALQR                  | 10 | 565,31  | 1128,61 |
| 3757 IPI00554648  | 50,3 | 50,3 YEELQSLAGK                  | 10 | 569,29  | 1136,57 |
| 8286 IPI00554648  | 57,9 | 57,9 SLD(M)DSIIAEVK              | 12 | 668,84  | 1335,66 |
| 8344 IPI00554648  | 93,8 | 93,8 ASLEAAIADAEQR               | 13 | 672,84  | 1343,67 |
| 7042 IPI00554648  | 49   | 49 TE(M)ENEFVLIK                 | 11 | 684,84  | 1367,66 |
| 15074 IPI00554648 | 88,5 | 88,5 LEGLTDEINFLR                | 12 | 710,38  | 1418,74 |
| 8571 IPI00019502  | 33,3 | 33,3 GDLPFVVPR                   | 9  | 500,28  | 998,55  |
| 2730 IPI00019502  | 35,7 | 35,7 LEVNLQA(M)K                 | 9  | 531,29  | 1060,56 |
| 3699 IPI00019502  | 36,2 | 36,2 FDQLLAEEK                   | 9  | 546,78  | 1091,55 |
| 11686 IPI00019502 | 53,8 | 53,8 DLGEELEALK                  | 10 | 558,79  | 1115,57 |
| 6924 IPI00019502  | 37,9 | 37,9 ALELDSNLYR                  | 10 | 597,31  | 1192,61 |
| 4904 IPI00019502  | 36,5 | 36,5 VEAQLQELQVK                 | 11 | 642,86  | 1283,71 |
| 17096 IPI00019502 | 63,4 | 63,4 VISGVLQLGNIVFK              | 14 | 743,95  | 1485,89 |
| 5324 IPI00019502  | 85,7 | 85,7 IAQLEEQLDNETK               | 13 | 765,89  | 1529,76 |
| 6959 IPI00019502  | 51,6 | 51,6 IAEFTTNLTETEEEK             | 14 | 827,40  | 1652,78 |
| 5259 IPI00019502  | 34,6 | 34,6 (M)EDSVGCLETAEEVK           | 15 | 856,87  | 1711,73 |
| 15566 IPI00019502 | 59,8 | 59,8 LQVELDNVTGLLSQSOSK          | 18 | 973,51  | 1945,00 |
| 15309 IPI00019502 | 32,5 | 32,5 TQLEEELEDELQATEDAK          | 17 | 981,46  | 1960,91 |
| 15584 IPI00019502 | 40,4 | 40,4 IIGLDQVAG(M)SETALPGAFK      | 20 | 1017,53 | 2033,05 |
| 11684 IPI00019502 | 41,7 | 41,7 VED(M)AELTCLNEASVLHNLK      | 20 | 768,04  | 2301,10 |
| 2458 IPI00396378  | 40,2 | 40,2 GGNFGFGDSR                  | 10 | 507,22  | 1012,44 |
| 8906 IPI00396378  | 52,3 | 52,3 IDTIEIITDR                  | 10 | 594,83  | 1187,64 |
| 11216 IPI00396378 | 47,9 | 47,9 GFGFVTFDDHDPVVK             | 15 | 848,39  | 1694,76 |
| 16599 IPI00396378 | 66,2 | 66,2 LFIGGLSFETTEESLR            | 16 | 899,97  | 1797,92 |
| 3128 IPI00396378  | 49,3 | 49,3 N(M)GGPYGGGNYGPGGSGGSGGYGGR | 25 | 1103,45 | 2204,89 |
| 3547 IPI00186290  | 31,3 | 31,3 FSVSPVVR                    | 8  | 445,76  | 889,50  |

|                   |      |                                    |    |         |         |
|-------------------|------|------------------------------------|----|---------|---------|
| 4213 IPI00186290  | 40,8 | 40,8 GVQYLNEIK                     | 9  | 532,29  | 1062,57 |
| 5542 IPI00186290  | 53   | 53 VNFTVDQIR                       | 9  | 546,30  | 1090,58 |
| 3799 IPI00186290  | 39,5 | 39,5 STLTDSLVC                     | 10 | 562,29  | 1122,56 |
| 14851 IPI00186290 | 50,2 | 50,2 EGIPALDNFLDK                  | 12 | 666,35  | 1330,68 |
| 4844 IPI00186290  | 31,3 | 31,3 DLEEDHACIPIK                  | 12 | 720,34  | 1438,67 |
| 17559 IPI00186290 | 85,7 | 85,7 TFCQLILDPIFK                  | 12 | 747,90  | 1493,79 |
| 6463 IPI00186290  | 81,5 | 81,5 ETVSEESNVLCLSK                | 14 | 797,89  | 1593,76 |
| 15691 IPI00186290 | 34,9 | 34,9 AYLPVNESFGFTADLR              | 16 | 900,45  | 1798,89 |
| 18211 IPI00186290 | 33,4 | 33,4 ALLELQLEPEELYQTFQR            | 18 | 740,72  | 2219,14 |
| 18776 IPI00186290 | 62,5 | 62,5 L(M)EPIYLV EIQCPQVVGGIYGV LNR | 26 | 1002,52 | 3004,54 |
| 7122 IPI00382470  | 87,8 | 87,8 TLTIVDTGIG(M)TK               | 13 | 683,37  | 1364,72 |
| 7122 IPI00382470  | 87,8 | 87,8 TLTLVDTGIG(M)TK               | 13 | 683,37  | 1364,72 |
| 15804 IPI00382470 | 38,4 | 38,4 HGLEVIY(M)IEPIDEYCVQQLK       | 21 | 865,09  | 2592,26 |
| 16491 IPI00021263 | 40,7 | 40,7 DSTLIMQLLR                    | 10 | 595,33  | 1188,65 |
| 14049 IPI00021263 | 45,5 | 45,5 DSTLI(M)QLLR                  | 10 | 603,33  | 1204,65 |
| 18304 IPI00021263 | 56,4 | 56,4 DICNDVLSLLEK                  | 12 | 709,86  | 1417,71 |
| 14026 IPI00021263 | 87,5 | 87,5 GIVDQSQQAYQEAFEISK            | 18 | 1021,00 | 2039,98 |
| 13344 IPI00465028 | 44,1 | 44,1 QSLGELIGTLNAAK                | 14 | 707,90  | 1413,78 |
| 4441 IPI00465028  | 39,5 | 39,5 HVFGESDELIGQK                 | 13 | 729,86  | 1457,71 |
| 14274 IPI00465028 | 93,2 | 93,2 VVLAYEPVWAIGTGK               | 15 | 801,95  | 1601,88 |
| 14319 IPI00465028 | 74,1 | 74,1 VPADTEVVCAPPTAYIDFAR          | 20 | 1096,54 | 2191,07 |
| 5547 IPI00291175  | 45,6 | 45,6 SLGEISALTSK                   | 11 | 553,31  | 1104,60 |
| 3627 IPI00291175  | 30,6 | 30,6 TNLLQVCER                     | 9  | 566,79  | 1131,57 |
| 5955 IPI00291175  | 86,3 | 86,3 AQQVSQGLDVLTA                 | 14 | 729,40  | 1456,79 |
| 5197 IPI00291175  | 47,5 | 47,5 LLAVAATAPPDAPNR               | 15 | 738,91  | 1475,81 |
| 12764 IPI00291175 | 61,4 | 61,4 VDQLTAQLADLAAR                | 14 | 742,91  | 1483,80 |
| 2073 IPI00013508  | 45,6 | 45,6 I(M)SIVDPNR                   | 9  | 530,78  | 1059,54 |
| 7300 IPI00013508  | 56,5 | 56,5 DYETATLSEIK                   | 11 | 635,31  | 1268,61 |
| 17619 IPI00013508 | 73   | 73 VGWEQLLTTIAR                    | 12 | 693,89  | 1385,77 |
| 16536 IPI00013508 | 40,6 | 40,6 GYEEWLLNEIR                   | 11 | 711,36  | 1420,70 |
| 7764 IPI00013508  | 69,3 | 69,3 TINEVENQILTR                  | 12 | 715,39  | 1428,76 |
| 9684 IPI00013508  | 61,6 | 61,6 AGTQIENIEEDFR                 | 13 | 761,36  | 1520,71 |

|                   |      |                                     |    |         |         |
|-------------------|------|-------------------------------------|----|---------|---------|
| 15914 IPI00013508 | 63   | 63 IDQLEGDHQLIQEALIFDNK             | 20 | 780,40  | 2338,18 |
| 6523 IPI00219018  | 41,3 | 41,3 GALQNIIPASTGAAK                | 15 | 706,40  | 1410,78 |
| 8244 IPI00219018  | 83   | 83 VPTANVSVDLTCR                    | 14 | 765,90  | 1529,79 |
| 14619 IPI00219018 | 74,8 | 74,8 LVINGNPITIFQER                 | 14 | 807,45  | 1612,89 |
| 12774 IPI00219018 | 58,3 | 58,3 LISWYDNEFGYSNR                 | 14 | 882,41  | 1762,80 |
| 4268 IPI00020101  | 31,1 | 31,1 ESYSVYVYK                      | 9  | 569,28  | 1136,54 |
| 2733 IPI00020101  | 47,5 | 47,5 KESYSVYVYK                     | 10 | 633,32  | 1264,63 |
| 17534 IPI00020101 | 59,2 | 59,2 A(M)GIMNSFVNDIFER              | 15 | 880,41  | 1758,81 |
| 14024 IPI00020101 | 82,6 | 82,6 A(M)GI(M)NSFVNDIFER            | 15 | 888,41  | 1774,80 |
| 11974 IPI00304925 | 43,7 | 43,7 DAGVIAGLNVLK                   | 12 | 599,35  | 1196,69 |
| 2153 IPI00304925  | 47,2 | 47,2 FGDPVVQSD(M)K                  | 11 | 619,79  | 1237,56 |
| 6904 IPI00304925  | 45,6 | 45,6 NQVALNPQNTVFDK                 | 15 | 829,93  | 1657,84 |
| 11694 IPI00304925 | 71,4 | 71,4 IINEPTAAAIAYGLDR               | 16 | 844,45  | 1686,89 |
| 16899 IPI00304925 | 51,1 | 51,1 ELEQVCNPIISGLYQGAGGPGGGFGAQQPK | 31 | 1019,17 | 3054,49 |
| 16034 IPI00220740 | 46,8 | 46,8 (M)TDQEAIQDLWQWR               | 14 | 918,42  | 1834,83 |
| 13656 IPI00220740 | 86,7 | 86,7 DELHIVEAEA(M)NYEGSPIK          | 19 | 1081,01 | 2160,00 |
| 17644 IPI00220740 | 98,7 | 98,7 (M)SVQPTVSLGGFEITPPVLR         | 21 | 1122,11 | 2242,20 |
| 2600 IPI00218918  | 34,7 | 34,7 PAFFAEK                        | 7  | 405,21  | 808,41  |
| 4548 IPI00218918  | 50,1 | 50,1 TPAQFDADELK                    | 11 | 631,80  | 1261,59 |
| 17576 IPI00218918 | 53,5 | 53,5 GVDEATHIDILTK                  | 13 | 463,26  | 1386,76 |
| 14039 IPI00218918 | 68,6 | 68,6 GTDVNVFNTILTTR                 | 14 | 775,91  | 1549,81 |
| 18256 IPI00218918 | 58   | 58 ALTGHLEEVVLALLK                  | 15 | 535,99  | 1604,95 |
| 17954 IPI00218918 | 35,4 | 35,4 GLGTDEDTLIEILASR               | 16 | 568,30  | 1701,88 |
| 9984 IPI00218918  | 36,1 | 36,1 GGPGSAVSPYPTFNPSSDVAALHK       | 24 | 786,06  | 2355,15 |
| 3899 IPI00216691  | 30,4 | 30,4 TLVLL(M)GK                     | 8  | 445,77  | 889,53  |
| 4511 IPI00216691  | 39   | 39 STGGAPTFNVTVTK                   | 14 | 690,36  | 1378,71 |
| 15434 IPI00216691 | 67,9 | 67,9 TFDNITPAEVLVGVK                | 16 | 822,47  | 1642,93 |
| 3173 IPI00169383  | 38,5 | 38,5 VDFNVP(M)K                     | 8  | 483,24  | 964,47  |
| 14761 IPI00169383 | 49,2 | 49,2 VLPQVDALSNI                    | 11 | 549,31  | 1096,61 |
| 9124 IPI00169383  | 29,7 | 29,7 YSLEPVAVELK                    | 11 | 624,35  | 1246,68 |
| 13644 IPI00169383 | 66,5 | 66,5 ACANPAAGSVILLENLR              | 17 | 884,97  | 1767,93 |
| 15494 IPI00014230 | 89,8 | 89,8 AFVDFLSDEIK                    | 11 | 642,33  | 1282,64 |



|       |             |      |      |                             |    |         |         |
|-------|-------------|------|------|-----------------------------|----|---------|---------|
| 16709 | IPI00014230 | 67,7 | 67,7 | ALVLDCHYPEDEVGQEDEAESDIFSIR | 27 | 1046,14 | 3135,40 |
| 3153  | IPI00024067 | 41,4 | 41,4 | HELIEFR                     | 7  | 472,25  | 942,49  |
| 3470  | IPI00024067 | 29,6 | 29,6 | EVCFACVDGK                  | 10 | 592,76  | 1183,50 |
| 8656  | IPI00024067 | 51,4 | 51,4 | NNLAGAEELFAR                | 12 | 652,83  | 1303,65 |
| 16096 | IPI00024067 | 65,7 | 65,7 | NLQNLLILTAIK                | 12 | 677,43  | 1352,84 |
| 3390  | IPI00024067 | 46   | 46   | VIQCFAETGQVQK               | 13 | 754,38  | 1506,75 |
| 13924 | IPI00024067 | 37,2 | 37,2 | LTDQLPLIIVCDR               | 13 | 778,43  | 1554,84 |
| 18774 | IPI00024067 | 40,1 | 40,1 | AF(M)TADLPNELIELLEK         | 17 | 982,01  | 1962,00 |
| 17824 | IPI00024067 | 40,1 | 40,1 | LPVVIGGLLDVDCSESVIK         | 19 | 1021,05 | 2040,09 |
| 15209 | IPI00024067 | 46,5 | 46,5 | GQCDLELINVCNENSLFK          | 18 | 1077,00 | 2151,99 |
| 12834 | IPI00024067 | 37,9 | 37,9 | ISGETIFVTAPHEATAGIIGVNR     | 23 | 785,09  | 2352,24 |
| 17914 | IPI00024067 | 29,6 | 29,6 | KFDVNTSAVQVLIHIGNLDR        | 21 | 592,82  | 2367,25 |
| 3872  | IPI00179330 | 65,2 | 65,2 | ESTLHLVLR                   | 9  | 534,31  | 1066,61 |
| 10124 | IPI00179330 | 75,3 | 75,3 | TITLEVEPSDTIENVK            | 16 | 894,47  | 1786,92 |
| 5127  | IPI00444262 | 41,3 | 41,3 | TGISDVFAK                   | 9  | 469,25  | 936,49  |
| 3849  | IPI00444262 | 38,3 | 38,3 | NDLAVVDVR                   | 9  | 500,77  | 999,53  |
| 5397  | IPI00444262 | 50   | 50   | EVFEDAAEIR                  | 10 | 589,79  | 1177,56 |
| 13216 | IPI00444262 | 91,4 | 91,4 | FGYVDFESAEDLEK              | 14 | 824,87  | 1647,73 |
| 4458  | IPI00025849 | 46,3 | 46,3 | VSGGLEVLAEK                 | 11 | 551,31  | 1100,61 |
| 13736 | IPI00025849 | 83   | 83   | LLPQLTYLDGYDR               | 13 | 783,91  | 1565,81 |
| 15664 | IPI00025849 | 76,5 | 76,5 | SLDLFNCEVTNLNDYR            | 16 | 986,96  | 1971,90 |
| 16574 | IPI00000816 | 94,3 | 94,3 | LICCDILDVLDK                | 12 | 738,87  | 1475,74 |
| 5007  | IPI00759596 | 57,8 | 57,8 | SDVEAIFSK                   | 9  | 498,26  | 994,50  |
| 8274  | IPI00759596 | 53,9 | 53,9 | VDSLLENLEK                  | 10 | 580,31  | 1158,61 |
| 10139 | IPI00759596 | 79,9 | 79,9 | GFAFVQYVNER                 | 11 | 665,33  | 1328,65 |
| 10004 | IPI00419585 | 65,8 | 65,8 | VSFELFADK                   | 9  | 528,27  | 1054,53 |
| 8064  | IPI00419585 | 45,2 | 45,2 | FEDENFILK                   | 9  | 577,79  | 1153,57 |
| 4325  | IPI00419585 | 39,3 | 39,3 | KITIADCGQLE                 | 11 | 624,32  | 1246,62 |
| 3310  | IPI00419585 | 35   | 35   | EGMNIVEA(M)ER               | 11 | 647,79  | 1293,57 |
| 18096 | IPI00419585 | 72   | 72   | VNPTVFFDIAVDGEPLGR          | 18 | 973,50  | 1944,99 |
| 5132  | IPI00026272 | 40,8 | 40,8 | AGLQFPVGR                   | 9  | 472,77  | 943,52  |
| 17554 | IPI00026272 | 72,2 | 72,2 | VTIAQGGVLPNIQAVLLPK         | 19 | 966,09  | 1930,16 |

|                   |      |                                      |    |         |         |
|-------------------|------|--------------------------------------|----|---------|---------|
| 8619 IPI00010779  | 57,4 | 57,4 LVILEGELER                      | 10 | 585,84  | 1169,67 |
| 6902 IPI00010779  | 71,4 | 71,4 IQLVEEELDR                      | 10 | 622,33  | 1242,65 |
| 17714 IPI00010779 | 68,3 | 68,3 EENVGLHQTLDQTLNELNCI            | 20 | 1170,56 | 2339,11 |
| 17269 IPI00299571 | 61,6 | 61,6 TGEAIVDAALSALR                  | 14 | 693,88  | 1385,75 |
| 11076 IPI00299571 | 61,8 | 61,8 GSFSEQGINEFLR                   | 13 | 742,36  | 1482,71 |
| 7064 IPI00299571  | 46,8 | 46,8 KDVIELTDDSFDK                   | 13 | 762,88  | 1523,74 |
| 11799 IPI00299571 | 87,4 | 87,4 LAAVDATVNQVLASR                 | 15 | 764,43  | 1526,84 |
| 8144 IPI00299571  | 47,7 | 47,7 GSTAPVGGGAFPTIVER               | 17 | 808,43  | 1614,84 |
| 5878 IPI00013808  | 31,1 | 31,1 NFITAEELR                       | 9  | 546,79  | 1091,56 |
| 7448 IPI00013808  | 57,1 | 57,1 AGTQIENIDEDFR                   | 13 | 754,36  | 1506,70 |
| 17461 IPI00013808 | 42,9 | 42,9 VEQIAAIAQELNELDYYDSHNVNTR       | 25 | 969,14  | 2904,39 |
| 11456 IPI00025512 | 49,5 | 49,5 LFDQAFGLPR                      | 10 | 582,31  | 1162,61 |
| 11164 IPI00025512 | 50,9 | 50,9 VSLDVNHFAPDELTVK                | 16 | 892,47  | 1782,92 |
| 9206 IPI00025512  | 54,4 | 54,4 PLPPAAIESPAVAAPAYSR             | 19 | 939,51  | 1877,00 |
| 11614 IPI00025512 | 33,9 | 33,9 LATQSNEITIPVTFESR               | 17 | 953,50  | 1904,99 |
| 16489 IPI00025512 | 59,8 | 59,8 YTLPPGVDPTQVSSSLSPGTLTVEAP(M)PK | 30 | 1038,86 | 3113,55 |
| 14526 IPI00025512 | 48   | 48 KYTLPPGVDPTQVSSSLSPGTLTVEAP(M)PK  | 31 | 1081,55 | 3241,64 |
| 2998 IPI00215719  | 82,6 | 82,6 GCGTVLLSGPR                     | 11 | 558,80  | 1115,58 |
| 3824 IPI00215719  | 32,2 | 32,2 TNSTFNQVVVK                     | 11 | 625,84  | 1249,67 |
| 6510 IPI00215719  | 32,9 | 32,9 TAVVVGTTITDDVR                  | 13 | 673,37  | 1344,73 |
| 13304 IPI00215719 | 80,1 | 80,1 ILTFDQLALDSPK                   | 13 | 730,90  | 1459,79 |
| 10864 IPI00218820 | 53,8 | 53,8 TIDDLEETLASAK                   | 13 | 703,36  | 1404,70 |
| 5297 IPI00012011  | 66,6 | 66,6 YALYDATYETK                     | 11 | 669,32  | 1336,62 |
| 16004 IPI00012011 | 97,3 | 97,3 EILVGDVGTQVDDPYATFVK            | 20 | 1083,55 | 2165,09 |
| 14241 IPI00013881 | 92,6 | 92,6 STGEAFVQFASQEIAEK               | 17 | 921,45  | 1840,89 |
| 14154 IPI00003377 | 82,8 | 82,8 NPPGFVFEFEDPR                   | 14 | 811,39  | 1620,76 |
| 11549 IPI00023860 | 61,3 | 61,3 YAVLYQPLFDK                     | 11 | 678,86  | 1355,71 |
| 14939 IPI00023860 | 81,8 | 81,8 LDGLVETPTGYIESLPR               | 17 | 930,49  | 1858,97 |
| 5537 IPI00643853  | 73,4 | 73,4 GVTFNVTTVDTK                    | 12 | 641,34  | 1280,66 |
| 17089 IPI00643853 | 39,5 | 39,5 IEEFLEAVLCPPR                   | 13 | 786,91  | 1571,80 |
| 13984 IPI00643853 | 59,5 | 59,5 LAALNPESNTAGLDIFAK              | 18 | 922,99  | 1843,97 |
| 16689 IPI00643853 | 50,8 | 50,8 FLDGNELTLADCNLLPK               | 17 | 966,99  | 1931,96 |

|       |             |      |      |                                |    |         |         |
|-------|-------------|------|------|--------------------------------|----|---------|---------|
| 13014 | IPI00028888 | 53,6 | 53,6 | GFGFVLFK                       | 8  | 457,76  | 913,51  |
| 4678  | IPI00028888 | 50,9 | 50,9 | FGEVVDCTIK                     | 10 | 584,29  | 1166,56 |
| 4678  | IPI00028888 | 50,9 | 50,9 | FGEVVDCTLK                     | 10 | 584,29  | 1166,56 |
| 7022  | IPI00028888 | 76,2 | 76,2 | IFVGGGLSPDTPEEK                | 14 | 744,88  | 1487,75 |
| 16191 | IPI00028888 | 37,3 | 37,3 | EYFGGFGEVESIELP(M)DNK          | 19 | 1088,99 | 2175,97 |
| 3887  | IPI00554788 | 46,8 | 46,8 | IVLQIDNAR                      | 9  | 521,31  | 1040,60 |
| 3378  | IPI00554788 | 53,6 | 53,6 | LEAEIATYR                      | 9  | 533,28  | 1064,55 |
| 3487  | IPI00554788 | 72,5 | 72,5 | AQIFANTVDNAR                   | 12 | 660,34  | 1318,66 |
| 8676  | IPI00554788 | 44,9 | 44,9 | GG(M)GSGGLATGIAGGLAG(M)GGIQNEK | 26 | 1147,05 | 2292,09 |
| 2273  | IPI00303882 | 51,3 | 51,3 | GGI(M)LPEK                     | 8  | 430,73  | 859,45  |
| 2400  | IPI00303882 | 64,6 | 64,6 | SVVTGGVQSV(M)GSR               | 14 | 690,35  | 1378,69 |
| 7188  | IPI00303882 | 46,5 | 46,5 | TLTAAAVSGAQPILSK               | 16 | 764,44  | 1526,87 |
| 8984  | IPI00303882 | 61,3 | 61,3 | LEENLPILQQPTEK                 | 14 | 826,45  | 1650,89 |
| 10626 | IPI00303882 | 42   | 42   | IATSLDGFVDVASVQQQR             | 17 | 917,97  | 1833,92 |
| 8044  | IPI00023748 | 84,7 | 84,7 | SPASDTYIVFGEAK                 | 14 | 742,87  | 1483,72 |
| 5913  | IPI00023748 | 89,6 | 89,6 | IEDLSQQAQLAAAEK                | 15 | 807,92  | 1613,83 |
| 12394 | IPI00008274 | 55,9 | 55,9 | LSDLLAPISEQIK                  | 13 | 713,91  | 1425,81 |
| 11286 | IPI00008274 | 82,7 | 82,7 | VENQENVSNLVIEDTELK             | 18 | 1037,02 | 2072,03 |
| 18966 | IPI00008274 | 44   | 44   | AGAAPYVQAFDSLLAGPVAEYLK        | 23 | 1176,11 | 2350,21 |
| 14214 | IPI00783128 | 43   | 43   | SPFVVNVAPPLDLSK                | 15 | 791,94  | 1581,87 |
| 6889  | IPI00783128 | 35,4 | 35,4 | GAGTGGLGLAIEGPSEAK             | 18 | 792,92  | 1583,82 |
| 15629 | IPI00783128 | 30,8 | 30,8 | FNDEHIPDSPFVVPVASLSDDAR        | 23 | 843,08  | 2526,20 |
| 2690  | IPI00216049 | 32,3 | 32,3 | GSDFDCELR                      | 9  | 549,73  | 1097,44 |
| 15626 | IPI00216049 | 65,3 | 65,3 | IILDLISESPIK                   | 12 | 670,91  | 1339,80 |
| 12979 | IPI00216049 | 35,1 | 35,1 | GSYGDLGGPIITTQVTIPK            | 19 | 959,02  | 1916,03 |
| 17316 | IPI00216049 | 29,6 | 29,6 | IITITGTQDQIQNAQYLLQNSVK        | 23 | 863,80  | 2588,38 |
| 4533  | IPI00220642 | 67,1 | 67,1 | NVTELNEPLSNEER                 | 14 | 822,40  | 1642,78 |
| 4847  | IPI00329801 | 36,5 | 36,5 | VLTEIIASR                      | 9  | 501,30  | 1000,59 |
| 18344 | IPI00329801 | 86,7 | 86,7 | ETSGNLEQLLLAVVK                | 15 | 807,46  | 1612,90 |
| 18154 | IPI00329801 | 72   | 72   | GLGTDEESILTLTISR               | 16 | 852,95  | 1703,89 |
| 4323  | IPI00024919 | 40,5 | 40,5 | HLSVNDLPVGR                    | 11 | 603,83  | 1205,65 |
| 14656 | IPI00024919 | 43,3 | 43,3 | GLFIIDPNGVIK                   | 12 | 643,38  | 1284,74 |

|                   |      |                                         |    |         |         |
|-------------------|------|-----------------------------------------|----|---------|---------|
| 15314 IPI00024919 | 89,7 | 89,7 DYGVLLLEGSGLALR                    | 14 | 731,90  | 1461,78 |
| 17869 IPI00289334 | 54,6 | 54,6 DGTCTVTYLPTLPGDYSILVK              | 21 | 1157,09 | 2312,16 |
| 17894 IPI00023598 | 37,8 | 37,8 GHYTEGAELVDAVLDDVVR                | 18 | 648,33  | 1941,98 |
| 13559 IPI00291006 | 50   | 50 IFGVTTLDIVR                          | 11 | 617,36  | 1232,71 |
| 7984 IPI00291006  | 53,1 | 53,1 GCDVVVIPAGVPR                      | 13 | 669,86  | 1337,71 |
| 3013 IPI00291006  | 68,8 | 68,8 AGAGSATLS(M)AYAGAR                 | 16 | 735,85  | 1469,69 |
| 13006 IPI00291006 | 33,5 | 33,5 VDFPQDQLTALTGR                     | 14 | 780,91  | 1559,80 |
| 13586 IPI00291006 | 32,1 | 32,1 SQETECTYFSTPLLLGK                  | 17 | 987,48  | 1972,95 |
| 17564 IPI00018146 | 53,7 | 53,7 SICTTVLELLDK                       | 12 | 696,38  | 1390,74 |
| 6553 IPI00011253  | 37,6 | 37,6 AELNEFLTR                          | 9  | 546,79  | 1091,56 |
| 6984 IPI00011253  | 66,5 | 66,5 GLCAIAQAESLR                       | 12 | 644,84  | 1287,66 |
| 4713 IPI00011253  | 55,1 | 55,1 ELAEDGYSGVEVR                      | 13 | 712,34  | 1422,66 |
| 12096 IPI00011253 | 36,9 | 36,9 FGFPEGSVELYAEK                     | 14 | 786,88  | 1571,75 |
| 2695 IPI00011253  | 51   | 51 GGKPEPPA(M)PQPVPPTA                  | 16 | 795,40  | 1588,79 |
| 13944 IPI00011253 | 32,3 | 32,3 FVDGL(M)IHSGDPVNYVDTAVR            | 22 | 828,73  | 2483,18 |
| 5750 IPI00440493  | 29,7 | 29,7 AVDSLVPGR                          | 10 | 513,80  | 1025,59 |
| 8756 IPI00440493  | 44,2 | 44,2 TSIAIDTIINQK                       | 12 | 658,87  | 1315,73 |
| 2853 IPI00440493  | 78,3 | 78,3 TGTAE(M)SSILEER                    | 13 | 720,34  | 1438,66 |
| 13914 IPI00440493 | 34,6 | 34,6 TGAIVDVPVGEELLGR                   | 16 | 812,95  | 1623,88 |
| 11294 IPI00023048 | 75,2 | 75,2 GVVQELQQAISK                       | 12 | 650,37  | 1298,72 |
| 5457 IPI00023048  | 55,4 | 55,4 LQIQCVVEDDK                        | 11 | 673,83  | 1345,65 |
| 9399 IPI00023048  | 37,8 | 37,8 VGTDLLEEEITK                       | 12 | 673,86  | 1345,70 |
| 4897 IPI00023048  | 39,3 | 39,3 IASLEVENQSLR                       | 12 | 679,87  | 1357,72 |
| 17141 IPI00023048 | 29,9 | 29,9 LQIQCVVEDDKVGTDLLEEEITK            | 23 | 892,12  | 2673,34 |
| 3183 IPI00171611  | 37,7 | 37,7 KSDVEAIFSK                         | 10 | 562,30  | 1122,59 |
| 19119 IPI00171611 | 80,5 | 80,5 FQSSAV(M)ALQEASEAYLVGLFEDTNLCAIHAK | 32 | 883,18  | 3528,68 |
| 8154 IPI00002966  | 45,9 | 45,9 VLATAFDTTLGGR                      | 13 | 661,36  | 1320,70 |
| 18074 IPI00002966 | 41   | 41 EFSITDVVPYPISLR                      | 15 | 868,47  | 1734,92 |
| 17504 IPI00002966 | 58,7 | 58,7 SNLAYDIVQLPTGLTGK                  | 18 | 952,03  | 1902,05 |
| 17826 IPI00002966 | 66,6 | 66,6 TSTVDLPIENQLLWQIDR                 | 18 | 1071,06 | 2140,12 |
| 6290 IPI00219219  | 39,3 | 39,3 SFVLNLGK                           | 8  | 439,26  | 876,51  |
| 4193 IPI00219219  | 34,8 | 34,8 LPDGYEFK                           | 8  | 484,74  | 967,46  |

|                   |      |                                       |    |         |         |
|-------------------|------|---------------------------------------|----|---------|---------|
| 5022 IPI00219219  | 38,5 | 38,5 DSNNLCLHFNPR                     | 12 | 743,85  | 1485,68 |
| 12154 IPI00219219 | 64,5 | 64,5 LNLEAINY(M)AADGDFK               | 16 | 900,93  | 1799,84 |
| 3829 IPI00018206  | 66,5 | 66,5 IGASFLQR                         | 8  | 446,26  | 890,50  |
| 2118 IPI00018206  | 32,9 | 32,9 (M)NLGVGAYR                      | 9  | 498,75  | 995,49  |
| 8364 IPI00018206  | 47,5 | 47,5 IAAAILNTPDLR                     | 12 | 634,37  | 1266,73 |
| 14171 IPI00018206 | 56   | 56 EYLPIGGLAEFCK                      | 13 | 748,88  | 1495,74 |
| 6912 IPI00216308  | 52,7 | 52,7 LTFDSSFSPNTGK                    | 13 | 700,84  | 1399,66 |
| 19086 IPI00219038 | 69,5 | 69,5 FQSAAIGALQEASEAYLVGLFEDTNLCAIHAK | 32 | 1146,57 | 3436,69 |
| 7569 IPI00220301  | 30,2 | 30,2 VVFVFGPDK                        | 9  | 504,28  | 1006,55 |
| 10904 IPI00220301 | 57,1 | 57,1 LPFPIIDDR                        | 9  | 543,30  | 1084,59 |
| 14954 IPI00220301 | 72,1 | 72,1 PGLLLLGDVAPNFEANTTVGR            | 21 | 1049,55 | 2097,09 |
| 15549 IPI00031461 | 43,8 | 43,8 FVSISDLLVPK                      | 11 | 609,36  | 1216,70 |
| 13851 IPI00031461 | 62,2 | 62,2 NPYYGGESASITPLEDLYK              | 19 | 1059,01 | 2116,00 |
| 11364 IPI00031804 | 70,1 | 70,1 LTLSALIDGK                       | 10 | 515,81  | 1029,61 |
| 11364 IPI00031804 | 70,1 | 70,1 LTLSALLDGK                       | 10 | 515,81  | 1029,61 |
| 12644 IPI00031804 | 53,1 | 53,1 LTLDTIFVPNTGK                    | 13 | 709,90  | 1417,78 |
| 11956 IPI00011274 | 35,4 | 35,4 GFCFITYTDEEPVK                   | 14 | 853,39  | 1704,77 |
| 8024 IPI00011274  | 61,2 | 61,2 VFVGGLSPDTSEEQIK                 | 16 | 853,44  | 1704,86 |
| 3445 IPI00217966  | 45,2 | 45,2 LVIITAGAR                        | 9  | 457,29  | 912,57  |
| 12754 IPI00217966 | 53,2 | 53,2 DQLIYNLLK                        | 9  | 560,32  | 1118,63 |
| 8521 IPI00216587  | 66,4 | 66,4 NCIVLIDSTPYR                     | 12 | 725,87  | 1449,73 |
| 7554 IPI00216587  | 65,8 | 65,8 ISSLLEEQFQQGK                    | 13 | 753,89  | 1505,77 |
| 2665 IPI00221222  | 60,1 | 60,1 DDN(M)FQIGK                      | 9  | 542,24  | 1082,47 |
| 18316 IPI00219217 | 80,2 | 80,2 SLADELALVDVLEDK                  | 15 | 815,43  | 1628,84 |
| 5883 IPI00219217  | 63,6 | 63,6 LIAPVAEEEEATVPNNK                | 16 | 847,95  | 1693,89 |
| 2643 IPI00794605  | 37,3 | 37,3 YDNEFGYSNR                       | 10 | 632,76  | 1263,51 |
| 2635 IPI00025252  | 37,4 | 37,4 FV(M)QEEFSR                      | 9  | 594,77  | 1187,53 |
| 11824 IPI00025252 | 31,6 | 31,6 FLQDYFDGNLK                      | 11 | 680,33  | 1358,65 |
| 16699 IPI00025252 | 57,5 | 57,5 ELSDFISYLQR                      | 11 | 685,85  | 1369,69 |
| 17244 IPI00025252 | 29,8 | 29,8 TFSHELSDFGLESTAGEIPVVAIR         | 24 | 859,11  | 2574,30 |
| 17389 IPI00025252 | 51   | 51 FAHTNVESLVNEYDDNGEGILFR            | 24 | 918,11  | 2751,31 |
| 7636 IPI00015077  | 78,4 | 78,4 TLTTVQGIADDYDK                   | 14 | 770,38  | 1538,75 |

|                   |      |                                                    |    |         |         |
|-------------------|------|----------------------------------------------------|----|---------|---------|
| 8094 IPI00335168  | 56,8 | 56,8 EAFQLFDR                                      | 8  | 513,26  | 1024,50 |
| 3218 IPI00335168  | 40,6 | 40,6 ALGQNPTNAEVLK                                 | 13 | 677,87  | 1353,73 |
| 2365 IPI00335168  | 65,3 | 65,3 ILYSQCGDV(M)R                                 | 11 | 679,32  | 1356,62 |
| 18874 IPI00465070 | 60,2 | 60,2 FQSSAV(M)ALQEACEAYLVGLFEDTNLCAIHAK            | 32 | 1201,57 | 3601,68 |
| 16014 IPI00010740 | 71,1 | 71,1 LFVGNLPADITEDEFK                              | 16 | 904,46  | 1806,91 |
| 14604 IPI00010740 | 51,8 | 51,8 PVIVEPLEQLDDEDGLPEK                           | 19 | 1068,04 | 2134,07 |
| 3270 IPI00027230  | 35   | 35 SGYLLPDTK                                       | 9  | 497,27  | 992,52  |
| 5404 IPI00027230  | 29,5 | 29,5 GLFDEYGSK                                     | 9  | 508,24  | 1014,46 |
| 8271 IPI00027230  | 38,4 | 38,4 SILFVPTSAPR                                   | 11 | 594,34  | 1186,67 |
| 8934 IPI00027230  | 61,3 | 61,3 GVVDSDDLPLNVS                                 | 14 | 743,38  | 1484,75 |
| 7614 IPI00027230  | 57,7 | 57,7 FQSSHPTDITSLDQYVER                            | 19 | 754,03  | 2259,06 |
| 12844 IPI00171903 | 55,3 | 55,3 AFITNIPFDVK                                   | 11 | 632,85  | 1263,69 |
| 15681 IPI00171903 | 39,8 | 39,8 VGEVTVVELL(M)DAEGK                            | 16 | 884,94  | 1767,86 |
| 7205 IPI00171903  | 31,4 | 31,4 GNFGGSFAGSFGGAGGHAPGVAR                       | 23 | 678,99  | 2033,95 |
| 3223 IPI00031812  | 65   | 65 RPQYSNPPVQGEV(M)EGADNQGAGEQGR                   | 27 | 963,11  | 2886,29 |
| 14221 IPI00024993 | 44,7 | 44,7 AQFAQPEILIGTIPGAGGTQR                         | 21 | 1063,07 | 2124,13 |
| 17944 IPI00008433 | 85,9 | 85,9 TIAECLADELINA                                 | 15 | 816,42  | 1630,82 |
| 14304 IPI00334587 | 45,8 | 45,8 GFGFILFK                                      | 8  | 464,77  | 927,52  |
| 6907 IPI00334587  | 62,6 | 62,6 IFVGGLNPEATEEK                                | 14 | 752,39  | 1502,76 |
| 16939 IPI00293434 | 74,8 | 74,8 VLESEQFLTELTR                                 | 14 | 839,46  | 1676,90 |
| 17459 IPI00008527 | 55,5 | 55,5 AAGVNVEPFWPGLFAK                              | 16 | 851,95  | 1701,89 |
| 16264 IPI00008527 | 69,2 | 69,2 ALANVNIGSLICNVGAGGPAPAAGAAGGAPAGGPAPSTAAAPAEK | 43 | 1270,31 | 3807,92 |
| 9136 IPI00030275  | 32,9 | 32,9 AQLLQPTLEINPR                                 | 13 | 746,93  | 1491,84 |
| 3507 IPI00413108  | 33,1 | 33,1 LLVVTDPR                                      | 8  | 456,78  | 911,54  |
| 11354 IPI00413108 | 78,2 | 78,2 AIVAIENPADVSVISSR                             | 17 | 870,98  | 1739,94 |
| 16206 IPI00413108 | 45,5 | 45,5 ADHQPLTEASYVNLPTIALCNTDSPLR                   | 27 | 999,50  | 2995,47 |
| 6598 IPI00013894  | 38,2 | 38,2 AAALFLNR                                      | 9  | 502,78  | 1003,54 |
| 10384 IPI00013894 | 37,8 | 37,8 LAYINPDLALEEK                                 | 13 | 744,90  | 1487,79 |
| 12536 IPI00013894 | 45,5 | 45,5 DCEECIQLEPTFIK                                | 14 | 891,41  | 1780,80 |
| 17396 IPI00013894 | 65,4 | 65,4 ALSVGNIDDALQCYSEAIK                           | 19 | 1034,01 | 2066,00 |
| 7671 IPI00017334  | 49,7 | 49,7 FDAGELITQR                                    | 10 | 575,30  | 1148,58 |
| 6796 IPI00017334  | 54,3 | 54,3 IFTSIGEDYDER                                  | 12 | 722,83  | 1443,65 |

|                   |      |                             |    |         |         |
|-------------------|------|-----------------------------|----|---------|---------|
| 17736 IPI00017334 | 35,9 | 35,9 NITYLPAGQSVLLQLPQ      | 17 | 928,02  | 1854,02 |
| 7102 IPI00290770  | 44,8 | 44,8 AVAQALEVIPR            | 11 | 583,85  | 1165,68 |
| 11296 IPI00290770 | 49,4 | 49,4 TAVETAVLLLR            | 11 | 593,36  | 1184,71 |
| 14754 IPI00290770 | 48,5 | 48,5 IGDEYFTFITDCK          | 13 | 804,87  | 1607,72 |
| 13694 IPI00556589 | 58   | 58 EGDVLTLLSER              | 12 | 680,85  | 1359,69 |
| 3335 IPI00217465  | 31,2 | 31,2 SGVSLAALK              | 9  | 423,26  | 844,50  |
| 4857 IPI00217465  | 64   | 64 ASGPPVSELITK             | 12 | 599,84  | 1197,66 |
| 2415 IPI00000875  | 31,1 | 31,1 TPEFLR                 | 6  | 381,71  | 761,41  |
| 9386 IPI00000875  | 36,8 | 36,8 STFVLDEFK              | 9  | 543,28  | 1084,54 |
| 16766 IPI00000875 | 60,8 | 60,8 ILGLLDAYLK             | 10 | 559,84  | 1117,67 |
| 7834 IPI00026154  | 38,1 | 38,1 SLEDQVE(M)LR           | 10 | 618,30  | 1234,59 |
| 4817 IPI00026154  | 70,6 | 70,6 AQQEQLAADAFAK          | 13 | 724,85  | 1447,69 |
| 7228 IPI00072377  | 50,2 | 50,2 VEVTEFEDIK             | 10 | 604,81  | 1207,60 |
| 3549 IPI00072377  | 32,9 | 32,9 LNEQASEEILK            | 11 | 637,33  | 1272,65 |
| 16134 IPI00072377 | 44,3 | 44,3 IDFYFDENPYFENK         | 14 | 920,91  | 1839,80 |
| 8974 IPI00072377  | 30,4 | 30,4 EQQEAIHIDEVQNEIDR      | 18 | 732,34  | 2194,01 |
| 13819 IPI00219156 | 58,4 | 58,4 VCTLAIIDPGDSDIIR       | 16 | 879,46  | 1756,90 |
| 3103 IPI00022774  | 43,2 | 43,2 KGDIFLVR               | 8  | 474,29  | 946,56  |
| 15479 IPI00022774 | 48,7 | 48,7 LDQLIYIPLPDEK          | 13 | 778,93  | 1555,85 |
| 18664 IPI00022774 | 52,6 | 52,6 NAPAIIFIDELDAIAPK      | 17 | 906,00  | 1809,98 |
| 13294 IPI00022774 | 38,1 | 38,1 LIVDEAINEDNSVVSLSQPK   | 20 | 1085,57 | 2169,12 |
| 7370 IPI00465430  | 64,4 | 64,4 LGSLVDEFK              | 9  | 504,27  | 1006,53 |
| 11016 IPI00465430 | 48,8 | 48,8 NIYVLQELDNPGAK         | 14 | 787,41  | 1572,81 |
| 8794 IPI00465430  | 44,7 | 44,7 TFNTSTGGLLLPSDTK       | 16 | 826,43  | 1650,85 |
| 4721 IPI00028091  | 36,2 | 36,2 LPACVVDCGTGYTK         | 14 | 770,86  | 1539,71 |
| 16304 IPI00028091 | 47,9 | 47,9 GVDDLDFFIGDEAIEKPTYATK | 22 | 815,40  | 2443,18 |
| 7368 IPI00216298  | 75,1 | 75,1 TAFQEALDAAGDK          | 13 | 668,82  | 1335,63 |
| 8564 IPI00022793  | 64,5 | 64,5 DQLLLGPTYATPK          | 13 | 708,89  | 1415,77 |
| 14564 IPI00022793 | 64,1 | 64,1 AQDEGLLSDVVPFK         | 14 | 759,40  | 1516,78 |
| 6133 IPI00020984  | 37,1 | 37,1 TPELNLDQFHDK           | 12 | 486,24  | 1455,70 |
| 17986 IPI00020984 | 54,8 | 54,8 IPNPdffEDLEPFR         | 14 | 868,42  | 1734,82 |
| 12034 IPI00020984 | 41,1 | 41,1 APVPTGEVYFADSFDR       | 16 | 885,92  | 1769,83 |

|                   |      |                                 |    |         |         |
|-------------------|------|---------------------------------|----|---------|---------|
| 14186 IPI00020599 | 71,9 | 71,9 FYALSASFEPFSNK             | 14 | 804,39  | 1606,77 |
| 14186 IPI00020599 | 71,9 | 71,9 FYALSAXFEPFSNK             | 14 | 804,39  | 1606,77 |
| 9514 IPI00221178  | 98   | 98 TPAVEGLTEAEEEEELR            | 16 | 886,93  | 1771,85 |
| 9516 IPI00221178  | 35,7 | 35,7 GLLSDS(M)TDVPVDTGVAAR      | 19 | 960,47  | 1918,93 |
| 4591 IPI00465439  | 60,7 | 60,7 PYQYPALTPEQK               | 12 | 717,87  | 1433,72 |
| 9566 IPI00218342  | 78,7 | 78,7 YVVVTGITPTPLGEGK           | 16 | 815,96  | 1629,90 |
| 6385 IPI00219153  | 42,3 | 42,3 ITVTSEVPFSK                | 11 | 604,33  | 1206,65 |
| 4215 IPI00219153  | 44,9 | 44,9 AGNLGGGVVTIER              | 13 | 621,84  | 1241,67 |
| 17046 IPI00413344 | 45,4 | 45,4 QILVGDIGDTVEDPYTSFVK       | 20 | 1098,56 | 2195,10 |
| 10684 IPI00024915 | 53,9 | 53,9 VNLAELFK                   | 8  | 467,27  | 932,53  |
| 4405 IPI00024915  | 29   | 29 FS(M)VVQDGIVK                | 11 | 619,83  | 1237,64 |
| 12144 IPI00024915 | 39,8 | 39,8 VGDAIPAVEVFEGEPGNK         | 18 | 914,46  | 1826,91 |
| 10969 IPI00026087 | 43,1 | 43,1 PVGSLAGIGEVLGK             | 14 | 648,88  | 1295,74 |
| 14529 IPI00026087 | 53,7 | 53,7 DFVAEP(M)GEKPVGSLAGIGEVLGK | 24 | 806,09  | 2415,23 |
| 2150 IPI00017297  | 41,5 | 41,5 SQAIE(M)ETR                | 10 | 614,29  | 1226,56 |
| 17844 IPI00017297 | 33,3 | 33,3 ITPENLPQILLQLK             | 14 | 540,66  | 1618,96 |
| 15094 IPI00017297 | 48   | 48 IGPYQPNVPVGIDYVIPK           | 18 | 985,04  | 1968,07 |
| 5943 IPI00012750  | 65,7 | 65,7 AALQELLSK                  | 9  | 486,79  | 971,57  |
| 3724 IPI00012066  | 75,5 | 75,5 PSSSPVIFAGGQDR             | 14 | 709,36  | 1416,70 |
| 16729 IPI00012066 | 39,1 | 39,1 AITIAGIPQSIIECVK           | 16 | 856,98  | 1711,95 |
| 8394 IPI00000874  | 42,9 | 42,9 GLFIIDDK                   | 8  | 460,76  | 919,50  |
| 4902 IPI00000874  | 38,8 | 38,8 TIAQDYGVLK                 | 10 | 554,31  | 1106,60 |
| 6228 IPI00000874  | 51,1 | 51,1 QITVNDLPVGR                | 11 | 606,34  | 1210,67 |
| 3964 IPI00000874  | 29,1 | 29,1 HGEVCPAGWKPGSDTIKPDVQK     | 22 | 602,30  | 2405,18 |
| 7160 IPI00018278  | 32,3 | 32,3 GDEELDSLK                  | 10 | 559,78  | 1117,55 |
| 6769 IPI00298547  | 34,1 | 34,1 GAEE(M)ETVIPVDV(M)R        | 15 | 854,40  | 1706,79 |
| 15034 IPI00298547 | 47,5 | 47,5 EGPYDVVVLPGGNLGAQNLSESAVK  | 26 | 1292,67 | 2583,32 |
| 16124 IPI00219005 | 54,7 | 54,7 FEIGEGENLDLPYGLER          | 17 | 975,98  | 1949,94 |
| 15229 IPI00016342 | 50,4 | 50,4 DPENFPFVVLGNK              | 13 | 738,38  | 1474,75 |
| 13921 IPI00016342 | 64   | 64 EAINVEQAFQTIAR               | 14 | 795,42  | 1588,82 |
| 17194 IPI00008438 | 59,7 | 59,7 IAIYELLFK                  | 9  | 555,33  | 1108,65 |
| 5187 IPI00217468  | 59,5 | 59,5 ATGPPVSELITK               | 12 | 606,85  | 1211,68 |



|                   |      |                                       |    |         |         |
|-------------------|------|---------------------------------------|----|---------|---------|
| 5772 IPI00299573  | 45,6 | 45,6 AGVNTVTTLVENK                    | 13 | 673,37  | 1344,72 |
| 3814 IPI00299573  | 74   | 74 TCTTVAFTQVNSEDK                    | 15 | 850,89  | 1699,77 |
| 4688 IPI00010796  | 36,6 | 36,6 DGVVLFK                          | 7  | 389,23  | 776,44  |
| 8256 IPI00010796  | 66   | 66 VDATEESDLAQQYGVR                   | 16 | 890,92  | 1779,83 |
| 9699 IPI00376798  | 65,5 | 65,5 VLEQLTGQTPVFSK                   | 14 | 773,93  | 1545,84 |
| 6869 IPI00032826  | 57,7 | 57,7 VAAIEALNDGELQK                   | 14 | 735,89  | 1469,77 |
| 6300 IPI00010720  | 33,1 | 33,1 LDVTSVEDYK                       | 10 | 584,79  | 1167,56 |
| 17766 IPI00010720 | 78,7 | 78,7 LGFAGLVQEISFGTTK                 | 16 | 834,45  | 1666,89 |
| 18871 IPI00021290 | 61   | 61 DLVSSLTSGLLTIGDR                   | 16 | 823,95  | 1645,88 |
| 13894 IPI00021290 | 56,4 | 56,4 GQELIYAG(M)PITEVFK               | 16 | 906,47  | 1810,92 |
| 9664 IPI00746388  | 53,6 | 53,6 APDFVIFYAPR                      | 10 | 591,80  | 1181,59 |
| 16216 IPI00746388 | 35,8 | 35,8 IAQDLE(M)YGINYFEIK               | 16 | 981,98  | 1961,94 |
| 17191 IPI00220327 | 79,1 | 79,1 SLDLDSIIAEVK                     | 12 | 651,86  | 1301,71 |
| 17256 IPI00220327 | 34   | 34 THNLEPYFESFINNLR                   | 16 | 665,33  | 1992,97 |
| 7109 IPI00012503  | 31,8 | 31,8 GCSFLPDPYQK                      | 11 | 656,31  | 1310,60 |
| 19014 IPI00012503 | 57,9 | 57,9 EIVDSYLPVILDIK                   | 15 | 865,50  | 1728,99 |
| 7734 IPI00022434  | 48,7 | 48,7 VPQVSTPTLVEVSR                   | 14 | 756,43  | 1510,84 |
| 5802 IPI00022434  | 37,9 | 37,9 KVPQVSTPTLVEVSR                  | 15 | 820,47  | 1638,93 |
| 2408 IPI00009904  | 64,4 | 64,4 VSQGQLVV(M)QPEK                  | 13 | 729,88  | 1457,75 |
| 7916 IPI00009904  | 29,8 | 29,8 FA(M)EPEEFDSDTLR                 | 14 | 851,87  | 1701,72 |
| 11954 IPI00008529 | 80,3 | 80,3 NIEDVIAQGIGK                     | 12 | 628,85  | 1255,68 |
| 7739 IPI00008529  | 33,5 | 33,5 LASVPAGGAVAVSAAPGSAAPAAGSAPAAAEK | 33 | 925,48  | 2773,42 |
| 4200 IPI00604590  | 39,7 | 39,7 TFIAIKPDGVQR                     | 12 | 672,88  | 1343,75 |
| 3123 IPI00604590  | 30,4 | 30,4 V(M)LGETNPADSKPGTIR              | 17 | 901,46  | 1800,90 |
| 16194 IPI00643920 | 47,4 | 47,4 LDNLVAILDINR                     | 12 | 684,90  | 1367,78 |
| 11274 IPI00643920 | 52,8 | 52,8 ILATPPQEDAPSVDIANIR              | 19 | 1010,54 | 2019,07 |
| 18994 IPI00026781 | 33,7 | 33,7 ALGLGVEQLPVVFEDVVLHQATILPK       | 26 | 929,20  | 2784,57 |
| 16324 IPI00026781 | 58,9 | 58,9 LFDHPESPTPNPTEPLFLAQAEVYK        | 25 | 947,48  | 2839,40 |
| 17404 IPI00015842 | 80,8 | 80,8 EIVVLETLEDIDK                    | 13 | 758,41  | 1514,81 |
| 2250 IPI00220362  | 30,1 | 30,1 GGI(M)LPEK                       | 8  | 430,73  | 859,45  |
| 12346 IPI00220362 | 37,8 | 37,8 VVLDDKDYFLFR                     | 12 | 765,40  | 1528,79 |
| 17156 IPI00009790 | 82,8 | 82,8 GITNLCVIGGDGSLTGANLFR            | 21 | 1068,05 | 2134,08 |

|                   |      |                            |    |         |         |
|-------------------|------|----------------------------|----|---------|---------|
| 9044 IPI00221088  | 53,7 | 53,7 LDYILGLK              | 8  | 467,78  | 933,55  |
| 15359 IPI00010154 | 46,2 | 46,2 EVEPALELLEPIDQK       | 15 | 861,96  | 1721,91 |
| 13456 IPI00010154 | 65,1 | 65,1 NPYYGGESSITPLEELYK    | 19 | 1074,01 | 2146,02 |
| 5893 IPI00215884  | 31,1 | 31,1 DGTGVVEFVR            | 10 | 539,78  | 1077,54 |
| 4812 IPI00215884  | 30,5 | 30,5 EAGDVCYADVYR          | 12 | 709,31  | 1416,60 |
| 14764 IPI00215884 | 34   | 34 GGPPFAFVEFEDPR          | 14 | 782,88  | 1563,74 |
| 2213 IPI00550363  | 50,8 | 50,8 NVIGLQ(M)GTNR         | 11 | 609,82  | 1217,62 |
| 2900 IPI00216682  | 38,3 | 38,3 GPSYGLSAEVK           | 11 | 554,29  | 1106,56 |
| 14334 IPI00216682 | 43   | 43 DGIILCELINK             | 11 | 644,35  | 1286,69 |
| 17446 IPI00016513 | 75,8 | 75,8 AFLTLAEDILR           | 11 | 631,36  | 1260,71 |
| 3562 IPI00027442  | 36,7 | 36,7 AVYTQDCPLAAAK         | 13 | 704,35  | 1406,69 |
| 14131 IPI00027442 | 58,1 | 58,1 DIINEEEVQFLK          | 12 | 738,88  | 1475,75 |
| 18814 IPI00027442 | 30,6 | 30,6 NVGCLQEALQLATSFAQLR   | 19 | 707,03  | 2118,08 |
| 8616 IPI00025019  | 52,9 | 52,9 GAVYSFDPVGSYQR        | 14 | 773,37  | 1544,73 |
| 10986 IPI00009342 | 36,7 | 36,7 VDQIQEIVTGNPTVIK      | 16 | 877,49  | 1752,96 |
| 7218 IPI00009342  | 66,3 | 66,3 EELQSGVDAANSAAQQYQR   | 19 | 1032,98 | 2063,95 |
| 5532 IPI00024145  | 36,5 | 36,5 YQLDPTASISAK          | 12 | 647,34  | 1292,66 |
| 8084 IPI00024145  | 68,2 | 68,2 LTFDITFSPNTGK         | 13 | 714,85  | 1427,69 |
| 6128 IPI00479997  | 47,3 | 47,3 DLSLEEIQK             | 9  | 537,79  | 1073,56 |
| 11064 IPI00479997 | 42,6 | 42,6 ASGQAFELILSPR         | 13 | 694,88  | 1387,75 |
| 13506 IPI00022442 | 40,2 | 40,2 L(M)CPQEIVDYIADK      | 14 | 855,91  | 1709,80 |
| 8104 IPI00646304  | 30,2 | 30,2 DF(M)IQGGDFTR         | 11 | 651,79  | 1301,57 |
| 10114 IPI00646304 | 69,8 | 69,8 TVDNFVALATGEK         | 13 | 682,86  | 1363,70 |
| 17324 IPI00297779 | 71,1 | 71,1 LGGSLADSYLDEGFLLDK    | 18 | 956,98  | 1911,94 |
| 13996 IPI00178440 | 48,3 | 48,3 SPAGLQVLNDYLADK       | 15 | 802,42  | 1602,83 |
| 18976 IPI00020042 | 31,9 | 31,9 ENAPAIIFIDEIDAIATK    | 18 | 972,52  | 1943,02 |
| 17706 IPI00020042 | 71,4 | 71,4 PQTGLSFLGPEPEDLEDLYSR | 21 | 1182,08 | 2362,14 |
| 3999 IPI00100197  | 73,3 | 73,3 LGAAPPEESAYVAGEK      | 16 | 810,89  | 1619,77 |
| 2445 IPI00029601  | 37   | 37 SAVGFEYQ GK             | 10 | 543,27  | 1084,52 |
| 8004 IPI00029601  | 65   | 65 NASTFEDVTQVSSAYQK       | 17 | 937,94  | 1873,87 |
| 7104 IPI00007188  | 38,6 | 38,6 AAYFGIYDTAK           | 11 | 610,30  | 1218,59 |
| 11706 IPI00007188 | 52,6 | 52,6 DFLAGGVAAAISK         | 13 | 610,34  | 1218,66 |

|                   |      |                                     |    |         |         |
|-------------------|------|-------------------------------------|----|---------|---------|
| 14994 IPI00007188 | 36,7 | 36,7 YFPTQALNFAFK                   | 12 | 723,87  | 1445,73 |
| 15916 IPI00025366 | 45,6 | 45,6 DILADLIPK                      | 9  | 499,30  | 996,58  |
| 11649 IPI00025366 | 36,1 | 36,1 GLVYETSVLDPDEGIR               | 16 | 881,95  | 1761,88 |
| 14654 IPI00296337 | 54   | 54 AALSALESFLK                      | 11 | 575,33  | 1148,64 |
| 14801 IPI00296337 | 38,3 | 38,3 TVGALQVLGTEAQSSLLK             | 18 | 908,02  | 1814,02 |
| 2975 IPI00217030  | 52,6 | 52,6 LTGVFAPR                       | 8  | 430,75  | 859,49  |
| 9454 IPI00217030  | 40,9 | 40,9 FDTGNLC(M)VTGGANLGR            | 17 | 899,91  | 1797,81 |
| 15179 IPI00217030 | 31,8 | 31,8 TDITYPAGF(M)DVISIDK            | 17 | 951,46  | 1900,91 |
| 9936 IPI00218733  | 57,4 | 57,4 GDGPVQGIINFEQK                 | 14 | 751,39  | 1500,76 |
| 17391 IPI00218733 | 29,2 | 29,2 DGVADVSIEDSVISLSGDHCIIGR       | 24 | 838,74  | 2513,20 |
| 16834 IPI00013415 | 39,8 | 39,8 AIIIFVPVQQLK                   | 12 | 669,43  | 1336,85 |
| 6328 IPI00017617  | 33,9 | 33,9 APILIATDVASR                   | 12 | 613,86  | 1225,70 |
| 10489 IPI00017617 | 40,2 | 40,2 GDGPICLVLAPTR                  | 13 | 684,87  | 1367,72 |
| 2693 IPI00798360  | 41,3 | 41,3 STEILLR                        | 7  | 416,25  | 830,48  |
| 2693 IPI00798360  | 41,3 | 41,3 STELLIR                        | 7  | 416,25  | 830,48  |
| 3113 IPI00003815  | 42,9 | 42,9 TDY(M)VGSYGPR                  | 11 | 631,28  | 1260,54 |
| 7509 IPI00003815  | 48,4 | 48,4 SIQEIQELDKDDESLR               | 16 | 959,47  | 1916,93 |
| 7278 IPI00021266  | 64,9 | 64,9 LAPDYDALDVANK                  | 13 | 702,85  | 1403,69 |
| 4473 IPI00001960  | 48,1 | 48,1 EVEIAYS DVAK                   | 11 | 612,31  | 1222,61 |
| 13264 IPI00001960 | 41,4 | 41,4 FLDGNE(M)TLADCNLLPK            | 17 | 983,96  | 1965,91 |
| 8784 IPI00015029  | 44,3 | 44,3 LTFSCLOGSDNFK                  | 13 | 723,34  | 1444,66 |
| 13646 IPI00001639 | 63,8 | 63,8 ESCLEAYTGIVQGLK                | 15 | 834,42  | 1666,82 |
| 5895 IPI00306332  | 63,1 | 63,1 AITGASLADI(M)AK                | 13 | 639,34  | 1276,67 |
| 14889 IPI00000105 | 48,6 | 48,6 LAQDPFPLYPGEVLEK               | 16 | 908,48  | 1814,95 |
| 12184 IPI00220834 | 43   | 43 TDTLEDLFPTTK                     | 12 | 690,85  | 1379,68 |
| 17921 IPI00220834 | 34,8 | 34,8 HL(M)LPDFDLLEDIESK             | 16 | 644,32  | 1929,94 |
| 19114 IPI00220834 | 38,3 | 38,3 ASFEEASNQLINHIEQFLDTNETPYF(M)K | 28 | 833,89  | 3331,52 |
| 18036 IPI00215637 | 62,8 | 62,8 SFLLDLLNATGK                   | 12 | 646,37  | 1290,72 |
| 2515 IPI00025491  | 30,1 | 30,1 KVDWLTEK                       | 8  | 509,78  | 1017,55 |
| 10906 IPI00025491 | 42,8 | 42,8 DQIYDIFQK                      | 9  | 585,30  | 1168,58 |
| 8671 IPI00465315  | 44,9 | 44,9 ADLIAYLK                       | 8  | 453,77  | 905,52  |
| 17876 IPI00465315 | 44,1 | 44,1 GIIWGEDTL(M)EYLENPK            | 17 | 1012,49 | 2022,96 |

|                   |      |                             |    |         |         |
|-------------------|------|-----------------------------|----|---------|---------|
| 16374 IPI00105598 | 45,8 | 45,8 EQSILELGSLAK           | 13 | 700,90  | 1399,79 |
| 7596 IPI00006052  | 61,4 | 61,4 IETLTQQLQAK            | 12 | 693,40  | 1384,79 |
| 14689 IPI00005158 | 59,7 | 59,7 TENPLILIDEVDK          | 13 | 749,90  | 1497,79 |
| 5037 IPI00215914  | 42   | 42 IL(M)VGLDAAGK            | 11 | 552,31  | 1102,61 |
| 17804 IPI00215914 | 38,2 | 38,2 LGEIVTTIPTIGFNVETVEYK  | 21 | 1162,13 | 2322,24 |
| 17526 IPI00219525 | 59   | 59 LVPLLDGTGDHIDGGNSEYR     | 20 | 1080,56 | 2159,11 |
| 4285 IPI00297579  | 58,8 | 58,8 KVEEAPEEFVVEK          | 14 | 831,42  | 1660,82 |
| 8574 IPI00179589  | 58,8 | 58,8 GPDGLTAFEATDNQAIK      | 17 | 874,43  | 1746,84 |
| 2910 IPI00024175  | 34,8 | 34,8 NIELAV(M)R             | 8  | 481,26  | 960,51  |
| 11326 IPI00024175 | 32,5 | 32,5 LTVEDPVTVEYITR         | 14 | 817,94  | 1633,86 |
| 15189 IPI00024175 | 41,2 | 41,2 AITVFSPDGHLFQVEYAQEAVK | 22 | 817,08  | 2448,23 |
| 10166 IPI00004092 | 58,4 | 58,4 VGEATETALTCLVEK        | 15 | 810,91  | 1619,81 |
| 8346 IPI00019755  | 49,8 | 49,8 EDPTVSALLTSEK          | 13 | 695,36  | 1388,70 |
| 17234 IPI00004358 | 47,8 | 47,8 IGEEFLTDLSQLK          | 13 | 746,90  | 1491,78 |
| 18794 IPI00004358 | 37,9 | 37,9 LQDFNVGDYIEAVLDR       | 16 | 933,96  | 1865,91 |
| 16319 IPI00221232 | 46,5 | 46,5 SDPLLIPTSENPFK         | 16 | 864,46  | 1726,91 |
| 5452 IPI00215780  | 42,9 | 42,9 VLQALEGLK              | 9  | 485,80  | 969,58  |
| 14586 IPI00012074 | 46,9 | 46,9 NLATTVTEEILEK          | 13 | 730,90  | 1459,78 |
| 2685 IPI00015262  | 34,2 | 34,2 AGQCVIGLQ(M)GTNK       | 14 | 746,87  | 1491,72 |
| 17726 IPI00465260 | 45   | 45 TFFSFPAVVAPFK            | 13 | 729,40  | 1456,78 |
| 12084 IPI00024933 | 31,7 | 31,7 QAQIEVVPSASALIK        | 16 | 833,99  | 1665,97 |
| 5617 IPI00024933  | 50,2 | 50,2 EILGTAQSVGCNVDGR       | 16 | 838,41  | 1674,80 |
| 15689 IPI00289499 | 56   | 56 (M)SSFGDFVALSDVCDVPTAK   | 20 | 1081,49 | 2160,97 |
| 18496 IPI00329389 | 55,7 | 55,7 ASITPGTILILTGR         | 15 | 763,47  | 1524,92 |
| 17374 IPI00298994 | 50,1 | 50,1 TLAESALQLLYTAK         | 14 | 761,43  | 1520,84 |
| 18686 IPI00298994 | 30,3 | 30,3 GVGAAATAVTQALNELLQHVK  | 21 | 697,72  | 2090,14 |
| 8314 IPI00302925  | 37,8 | 37,8 FAEAFEAIPIR            | 10 | 575,80  | 1149,58 |
| 14519 IPI00032460 | 54,7 | 54,7 YVQLPADEVDTQLLQDAAR    | 19 | 1073,04 | 2144,07 |
| 9676 IPI00009030  | 54,7 | 54,7 IPLNDLFR               | 8  | 494,28  | 986,55  |
| 17669 IPI00005737 | 53,7 | 53,7 LCLISTFLEDGIR          | 13 | 768,91  | 1535,80 |
| 13836 IPI00021700 | 53   | 53 AEDNADTLALVFEAPNQEK      | 19 | 1038,00 | 2073,98 |
| 10246 IPI00217975 | 33,8 | 33,8 IQELEDLLAK             | 10 | 586,33  | 1170,65 |

|                   |      |                               |    |         |         |
|-------------------|------|-------------------------------|----|---------|---------|
| 19156 IPI00217975 | 47,3 | 47,3 SLEGDLEDLKDQIAQLEASLAAAK | 24 | 843,44  | 2527,30 |
| 10484 IPI00001589 | 52,3 | 52,3 VQIAVANAQELLQR           | 14 | 776,94  | 1551,87 |
| 8324 IPI00479217  | 42,8 | 42,8 GYFEYIEENK               | 10 | 646,30  | 1290,58 |
| 15109 IPI00026302 | 47,9 | 47,9 LYTLVTYVPVTTFK           | 14 | 822,97  | 1643,92 |
| 2603 IPI00013895  | 51,5 | 51,5 DGYNYTLSK                | 9  | 530,75  | 1059,49 |
| 15374 IPI00021926 | 44,7 | 44,7 ALQSVGQIVGEVLK           | 14 | 720,92  | 1439,83 |
| 19726 IPI00240909 | 48,4 | 48,4 IQDALSTVLQYAEDVLSGK      | 19 | 1025,54 | 2049,06 |
| 7170 IPI00443909  | 50,7 | 50,7 INPDGSQSVVEVPYAR         | 16 | 865,94  | 1729,86 |
| 3734 IPI00163187  | 50,7 | 50,7 LSCFAQTVSPA EK           | 13 | 719,36  | 1436,70 |
| 3213 IPI00718917  | 35,3 | 35,3 VGDVYIPR                 | 8  | 459,76  | 917,50  |
| 8321 IPI00027626  | 31,6 | 31,6 ALQFLEEVK                | 9  | 538,80  | 1075,59 |
| 19414 IPI00027626 | 31,6 | 31,6 VHAELADVLTEAVVDSILAIK    | 21 | 736,08  | 2205,22 |
| 2948 IPI00140827  | 49,7 | 49,7 VAGQDGSVVQFK             | 12 | 617,82  | 1233,63 |
| 2245 IPI00009032  | 33,1 | 33,1 GQVLNIQ(M)R              | 9  | 537,79  | 1073,56 |
| 14444 IPI00009032 | 30,1 | 30,1 ICHQIEYYFGDFNLPR         | 16 | 691,33  | 2070,96 |
| 9529 IPI00550746  | 49,5 | 49,5 GQPAIIDGELYNEVK          | 15 | 823,43  | 1644,84 |
| 3684 IPI00219757  | 49,4 | 49,4 ASCLYGQLPK               | 10 | 568,79  | 1135,57 |
| 2403 IPI00008530  | 29   | 29 SNYFLK                     | 6  | 386,20  | 770,40  |
| 9486 IPI00410034  | 49,2 | 49,2 TANEGGSLLYEQLGYK         | 16 | 871,93  | 1741,85 |
| 10476 IPI00219446 | 48,7 | 48,7 GNDISSGTVLSDYVGSPPK      | 20 | 975,48  | 1948,94 |
| 16841 IPI00027107 | 48,4 | 48,4 GEETPVIVGSALCALEGR       | 18 | 929,47  | 1856,93 |
| 4593 IPI00045660  | 48   | 48 FEAGQFEPSETTAK             | 14 | 771,36  | 1540,70 |
| 12486 IPI00018140 | 48   | 48 NLANTVTEEILEK              | 13 | 737,39  | 1472,77 |
| 17696 IPI00375511 | 47,9 | 47,9 FFEVILIDPFHK             | 12 | 502,28  | 1503,81 |
| 14901 IPI00030243 | 47,8 | 47,8 LLELDSFLK                | 9  | 539,31  | 1076,61 |
| 5737 IPI00398135  | 46,5 | 46,5 TGAAPIIDVVR              | 11 | 556,33  | 1110,64 |
| 6163 IPI00298363  | 44,4 | 44,4 IGGIDVPVPR               | 11 | 540,31  | 1078,61 |
| 6123 IPI00021828  | 42,9 | 42,9 SQVVAGTNYFIK             | 12 | 663,86  | 1325,70 |
| 9864 IPI00017672  | 46,3 | 46,3 LGADAVG(M)STVPEVIVAR     | 18 | 900,98  | 1799,95 |
| 6771 IPI00550069  | 46,1 | 46,1 ELSLAGNELGDEGAR          | 15 | 765,87  | 1529,73 |
| 3265 IPI00031691  | 31,2 | 31,2 GVTLGFR                  | 7  | 375,22  | 748,42  |
| 14776 IPI00031691 | 36,1 | 36,1 TILSNQTVDIPENV DITLK     | 19 | 1057,07 | 2112,13 |

|                   |      |                                 |    |         |         |
|-------------------|------|---------------------------------|----|---------|---------|
| 11026 IPI00291510 | 45,6 | 45,6 NLIDAGVDALR                | 11 | 578,82  | 1155,62 |
| 3502 IPI00029623  | 45,4 | 45,4 HITIFSPEGR                 | 10 | 578,81  | 1155,60 |
| 13974 IPI00220503 | 45,3 | 45,3 LLGPDAAINLTDPDGALAK        | 19 | 933,00  | 1863,99 |
| 17814 IPI00179964 | 37,9 | 37,9 KLPIDVTEGEVISLGLPFGK       | 20 | 704,74  | 2111,19 |
| 19364 IPI00179964 | 29,7 | 29,7 IIVENLFYPVTLVDLHQIFSK      | 21 | 830,13  | 2487,37 |
| 2430 IPI00031522  | 38,8 | 38,8 FGELV(M)TK                 | 8  | 470,74  | 939,47  |
| 16469 IPI00031522 | 31,6 | 31,6 TVLGTPEVLLGALPGAGGTQR      | 21 | 1004,06 | 2006,11 |
| 10594 IPI00030154 | 44,2 | 44,2 TENLLGSYFPK                | 11 | 634,83  | 1267,64 |
| 14326 IPI00002214 | 44,1 | 44,1 LLGASELPIVTPALR            | 15 | 775,47  | 1548,92 |
| 16389 IPI00220857 | 44,1 | 44,1 GTVPDDAVEALADSLGK          | 17 | 829,42  | 1656,82 |
| 6570 IPI00026185  | 43,9 | 43,9 STLNEIYFGK                 | 10 | 586,30  | 1170,59 |
| 7789 IPI00075248  | 43,8 | 43,8 EAFSLFDK                   | 8  | 478,74  | 955,46  |
| 9876 IPI00328319  | 43,8 | 43,8 TPSSDVLVFDYTK              | 13 | 736,37  | 1470,72 |
| 17806 IPI00022744 | 40,1 | 40,1 LLQTDDEEEAGLLELLK          | 17 | 965,01  | 1928,00 |
| 8419 IPI00005648  | 43,3 | 43,3 SEPVKEESSELEQPFAQDTSSVGPDR | 26 | 950,11  | 2847,31 |
| 6280 IPI00017451  | 43,1 | 43,1 VQAQVIQETIVPK              | 13 | 726,92  | 1451,83 |
| 7132 IPI00290566  | 44,4 | 44,4 VLCELADLQDK                | 11 | 652,33  | 1302,65 |
| 13151 IPI00290566 | 50,4 | 50,4 LPIGDVATQYFADR             | 14 | 783,40  | 1564,79 |
| 6340 IPI00549343  | 42,9 | 42,9 ADALQAGASQFETSAAK          | 17 | 833,41  | 1664,80 |
| 15366 IPI00012442 | 29,8 | 29,8 DFFQSYGNVVELR              | 13 | 787,39  | 1572,76 |
| 12986 IPI00012442 | 33,1 | 33,1 SSSPAPADIAQTVQEDLR         | 18 | 942,97  | 1883,93 |
| 5417 IPI00017964  | 42,6 | 42,6 VAQLEQVYIR                 | 10 | 609,85  | 1217,68 |
| 17496 IPI00334159 | 42,2 | 42,2 LHLGIPEAVFVEDVDSF(M)K      | 19 | 721,37  | 2161,08 |
| 11096 IPI00009634 | 41,8 | 41,8 EGNAIFTFPNTPVK             | 14 | 767,90  | 1533,79 |
| 14699 IPI00005657 | 41,5 | 41,5 EELALLDGSNVVFK             | 14 | 767,41  | 1532,81 |
| 8924 IPI00453476  | 33,6 | 33,6 YADLTEDQLPSCESLK           | 16 | 934,93  | 1867,85 |
| 17614 IPI00645078 | 40,4 | 40,4 SLVASLAEPDFVVTDFAK         | 18 | 955,00  | 1907,99 |
| 11936 IPI00306960 | 40,2 | 40,2 IFDSEEILAGYK               | 12 | 692,85  | 1383,69 |
| 2065 IPI00000477  | 39,5 | 39,5 VF(M)QEFK                  | 7  | 472,73  | 943,45  |
| 9896 IPI00641582  | 39,1 | 39,1 VQGLEQAVDNFEGK             | 14 | 767,38  | 1532,75 |
| 13834 IPI00002657 | 39   | 39 DIVQFVPPFR                   | 9  | 560,81  | 1119,61 |
| 7062 IPI00011603  | 38,8 | 38,8 FNQVLDQFGEK                | 11 | 662,83  | 1323,64 |

|                   |      |                             |    |        |         |
|-------------------|------|-----------------------------|----|--------|---------|
| 3717 IPI00001543  | 38,5 | 38,5 LTELS(M)QDEEL(M)K      | 13 | 799,87 | 1597,72 |
| 16851 IPI00015911 | 38,1 | 38,1 NLGLEELGIELDPR         | 14 | 784,42 | 1566,83 |
| 5084 IPI00465361  | 38   | 38 LATQLTGVPV(M)PVR         | 13 | 699,89 | 1397,77 |
| 9706 IPI00386354  | 38   | 38 ELLLPVTISR               | 11 | 634,88 | 1267,75 |
| 14611 IPI00375631 | 37,9 | 37,9 VPLASQGLGPGSTVLLVVDK   | 20 | 975,57 | 1949,12 |
| 5242 IPI00021812  | 31,3 | 31,3 GEGPDVDVNLPK           | 12 | 620,31 | 1238,61 |
| 18044 IPI00021347 | 37,8 | 37,8 TDQVIQSLIALVNDPQPEHPLR | 22 | 621,59 | 2482,32 |
| 14831 IPI00034319 | 33,4 | 33,4 TQSSLVPALTDVFR         | 14 | 767,42 | 1532,82 |
| 11849 IPI00015671 | 30,6 | 30,6 SFGGGTGSFSTLL(M)ER     | 17 | 860,41 | 1718,80 |
| 12996 IPI00003949 | 42,5 | 42,5 YFHVVIAGPQDSPFEGGTFK   | 20 | 732,70 | 2195,07 |
| 7245 IPI00010157  | 37,1 | 37,1 FVIGGPQGDAGLTGR        | 15 | 722,88 | 1443,75 |
| 3428 IPI00021187  | 36,9 | 36,9 AVLLAGPPGTGK           | 12 | 540,82 | 1079,63 |
| 15354 IPI00160021 | 36,9 | 36,9 SVFFGPDFITVTK          | 13 | 729,39 | 1456,76 |
| 7976 IPI00329633  | 36,8 | 36,8 NELSGALTGLTR           | 12 | 616,34 | 1230,66 |
| 18824 IPI00293533 | 36,6 | 36,6 ELEDLLSPLEELVK         | 14 | 813,94 | 1625,87 |
| 15446 IPI00018931 | 36,6 | 36,6 IPVDTYNNILTVLK         | 14 | 801,96 | 1601,90 |
| 13871 IPI00646240 | 33,2 | 33,2 (M)GI(M)NSFVNDIFER     | 14 | 852,89 | 1703,76 |
| 2085 IPI00030929  | 36,1 | 36,1 EAFN(M)IDQNR           | 10 | 627,28 | 1252,55 |
| 8386 IPI00014238  | 35,6 | 35,6 LPETNLFETEETR          | 13 | 789,89 | 1577,76 |
| 2700 IPI00001757  | 35,5 | 35,5 FAEYGEIK               | 8  | 478,74 | 955,46  |
| 15411 IPI00306369 | 35,1 | 35,1 SEGALELADVSNELPGLK     | 18 | 921,48 | 1840,94 |
| 2545 IPI00419880  | 33,2 | 33,2 TTDGYLLR               | 8  | 469,75 | 937,49  |
| 7676 IPI00221091  | 34,6 | 34,6 HGYIGEFEIIDDHR         | 14 | 567,61 | 1699,80 |
| 7876 IPI00033034  | 34,5 | 34,5 VEGGTPLFTLR            | 11 | 595,33 | 1188,65 |
| 14366 IPI00008240 | 34,4 | 34,4 ITQDIFQQLLK            | 11 | 673,89 | 1345,76 |
| 7889 IPI00299000  | 34,4 | 34,4 ITSGPFEPDLYK           | 12 | 683,85 | 1365,68 |
| 3085 IPI00550021  | 34,3 | 34,3 IGQGYLIK               | 8  | 446,27 | 890,52  |
| 3465 IPI00550021  | 64,5 | 64,5 GEATVSFDDPPSAK         | 14 | 710,83 | 1419,65 |
| 2760 IPI00010182  | 34,2 | 34,2 PG(M)LDFTGK            | 9  | 491,24 | 980,46  |
| 7616 IPI00334190  | 34,1 | 34,1 AEQINQAAGEASAVLAK      | 17 | 835,94 | 1669,86 |
| 15219 IPI00219622 | 34   | 34 LAQQYYLVYQEPIPTAQLVQR    | 21 | 841,12 | 2520,34 |
| 6756 IPI00302927  | 34   | 34 VIDPATATSVDLR            | 13 | 679,37 | 1356,72 |

|                   |      |                                      |    |         |         |
|-------------------|------|--------------------------------------|----|---------|---------|
| 18021 IPI00013485 | 33,9 | 33,9 SLEEIYLFSLPIK                   | 13 | 776,44  | 1550,86 |
| 2703 IPI00012007  | 33,8 | 33,8 FDNLYGCR                        | 8  | 522,73  | 1043,45 |
| 17076 IPI00028006 | 33,6 | 33,6 FILNLP TFSVR                    | 11 | 653,88  | 1305,74 |
| 3448 IPI00017448  | 33,5 | 33,5 TYAICGAIR                       | 9  | 512,77  | 1023,52 |
| 14269 IPI00296022 | 33,5 | 33,5 SHTEEDCTEELFDLHAR               | 18 | 745,99  | 2234,95 |
| 6238 IPI00016339  | 33,3 | 33,3 LVLLGESAVGK                     | 11 | 543,33  | 1084,65 |
| 11044 IPI00165393 | 33,2 | 33,2 DLSTVEALQNLK                    | 12 | 665,86  | 1329,72 |
| 5724 IPI00442278  | 33   | 33 FINEVLR                           | 7  | 445,76  | 889,50  |
| 11446 IPI00219678 | 35,1 | 35,1 DIDEVSSLLR                      | 10 | 573,80  | 1145,59 |
| 10671 IPI00219678 | 31,4 | 31,4 DEQLES LFQR                     | 10 | 632,81  | 1263,61 |
| 9884 IPI00008524  | 29,1 | 29,1 GFGFVS FER                      | 9  | 523,26  | 1044,50 |
| 17654 IPI00008524 | 32,5 | 32,5 ITG(M) LLEIDNSELLH(M) LESPE SLR | 24 | 924,80  | 2771,37 |
| 7581 IPI00215743  | 32,5 | 32,5 SHVEDGDIAGAPASSPEAPP AEQDPVQLK  | 29 | 971,47  | 2911,38 |
| 2875 IPI00295741  | 32,4 | 32,4 ICEPGYSPTYK                     | 11 | 657,80  | 1313,59 |
| 16716 IPI00419237 | 32,3 | 32,3 TFYGLHQDFPSVVLVGLGK             | 19 | 693,04  | 2076,10 |
| 15111 IPI00172636 | 32,2 | 32,2 FTDEYQLFEELGK                   | 13 | 809,89  | 1617,76 |
| 8746 IPI00006211  | 31,9 | 31,9 GPFTDVVTTNLK                    | 12 | 646,35  | 1290,68 |
| 11436 IPI00396370 | 31,8 | 31,8 GTQGVVTNFEIFR                   | 13 | 734,38  | 1466,75 |
| 18594 IPI00005705 | 31,7 | 31,7 EIFLSQPILLELEAPLK               | 17 | 651,71  | 1952,12 |
| 14686 IPI00032851 | 31,3 | 31,3 GEDVPLTEQTVS QVLQSAK            | 19 | 1015,03 | 2028,04 |
| 8576 IPI00019770  | 31,2 | 31,2 FVNVP TFGK                      | 10 | 554,31  | 1106,61 |
| 6098 IPI00027252  | 31,2 | 31,2 FNASQLITQR                      | 10 | 589,32  | 1176,63 |
| 2970 IPI00395627  | 31,1 | 31,1 ISNYGWDQSDK                     | 11 | 656,79  | 1311,57 |
| 2818 IPI00470658  | 30,1 | 30,1 IETIEV(M) EDR                   | 10 | 625,80  | 1249,59 |
| 12116 IPI00299155 | 30,5 | 30,5 LLDEVFFSEK                      | 10 | 613,82  | 1225,62 |
| 4195 IPI00410693  | 30,4 | 30,4 PGHLQEGFGCVVTNR                 | 15 | 557,61  | 1669,80 |
| 14371 IPI00026570 | 30,4 | 30,4 LFQEDDEIPLYLK                   | 13 | 811,92  | 1621,82 |
| 5262 IPI00186711  | 30,1 | 30,1 AQVEQELTTLR                     | 11 | 644,35  | 1286,68 |
| 17454 IPI00414603 | 30   | 30 LLDFGSLSNLQVTQPTVG(M) NFK         | 22 | 809,08  | 2424,23 |
| 3365 IPI00219160  | 29,6 | 29,6 AFLIEEQK                        | 8  | 489,27  | 976,52  |
| 14986 IPI00306290 | 29,6 | 29,6 LAQVSP ELLASVR                  | 14 | 748,44  | 1494,88 |
| 8014 IPI00219229  | 29,5 | 29,5 GDGVVLVAPPLR                    | 12 | 596,86  | 1191,70 |



|                   |      |                                |    |        |         |
|-------------------|------|--------------------------------|----|--------|---------|
| 12296 IPI00413451 | 29,4 | 29,4 IAELLSPGSVDPLTR           | 15 | 784,44 | 1566,86 |
| 3584 IPI00012345  | 29,1 | 29,1 TNEGVIEFR                 | 9  | 532,77 | 1063,53 |
| 18219 IPI00100160 | 55,2 | 55,2 KLEGDSTDLSAQIAELQAQIAELK  | 24 | 872,45 | 2614,33 |
| 3657 IPI00026216  | 61,3 | 61,3 GDYPLEAVR                 | 9  | 510,26 | 1018,51 |
| 13816 IPI00002459 | 29,9 | 29,9 GSIHDFPGFDPNQDAEALYTA(M)K | 23 | 847,38 | 2539,13 |
| 5482 IPI00003918  | 34,2 | 34,2 IGIEIHK                   | 7  | 393,26 | 784,51  |
| 10074 IPI00012340 | 38   | 38 DVIEEYFK                    | 8  | 521,76 | 1041,50 |
| 17341 IPI00247295 | 57,4 | 57,4 SVEELLEAELLK              | 12 | 686,88 | 1371,75 |
| 15329 IPI00020557 | 32,7 | 32,7 TIISYIDEQFER              | 12 | 757,38 | 1512,75 |
| 8519 IPI00010951  | 49,6 | 49,6 DAGQISGLNVLR              | 12 | 621,84 | 1241,67 |

## Suppl Table 3: August Low LET Peptides

| Scan# | IPI000000#  | Score# | Top score | Sequence              | Pep.Length | m/z     | Neutral mass (exp) |
|-------|-------------|--------|-----------|-----------------------|------------|---------|--------------------|
| 4360  | IPI00418471 | 58,5   | 58,5      | TYSLGSALR             | 9          | 484,26  | 966,51             |
| 2499  | IPI00418471 | 52,4   | 52,4      | LQEEMLQR              | 8          | 523,77  | 1045,52            |
| 9083  | IPI00418471 | 29,3   | 29,3      | DNLAEDIMR             | 9          | 538,76  | 1075,50            |
| 3997  | IPI00418471 | 33,5   | 33,5      | DNLAEDI(M)R           | 9          | 546,75  | 1091,49            |
| 3229  | IPI00418471 | 95,3   | 95,3      | FADLSEAANR            | 10         | 547,27  | 1092,52            |
| 3564  | IPI00418471 | 72     | 72        | VELQELNDR             | 9          | 558,29  | 1114,56            |
| 2479  | IPI00418471 | 67,8   | 67,8      | LQDEIQNMK             | 9          | 559,78  | 1117,54            |
| 7265  | IPI00418471 | 64,7   | 64,7      | EYQDLLNVK             | 9          | 561,30  | 1120,58            |
| 13135 | IPI00418471 | 81,5   | 81,5      | ILLAELEQLK            | 10         | 585,36  | 1168,71            |
| 3712  | IPI00418471 | 57,3   | 57,3      | LGDLYEEE(M)R          | 10         | 635,78  | 1269,55            |
| 10268 | IPI00418471 | 42     | 42        | (M)ALDIEIATYR         | 11         | 656,33  | 1310,65            |
| 4705  | IPI00418471 | 55,9   | 55,9      | EEAENTLQSFR           | 11         | 662,31  | 1322,61            |
| 4785  | IPI00418471 | 58,7   | 58,7      | SLYASSPGGVYATR        | 14         | 714,86  | 1427,70            |
| 8096  | IPI00418471 | 46,5   | 46,5      | QVQSLTCEVDALK         | 13         | 745,88  | 1489,75            |
| 11117 | IPI00418471 | 91     | 91        | KVESLQEEIAFLK         | 13         | 767,43  | 1532,85            |
| 8015  | IPI00418471 | 53,7   | 53,7      | ETNLDSLPLVDTHSK       | 15         | 834,93  | 1667,84            |
| 2774  | IPI00418471 | 31     | 31        | DGQVINETSQHDDLE       | 16         | 918,90  | 1835,79            |
| 20295 | IPI00418471 | 70,4   | 70,4      | LLQDSVDFSLADAINTEFK   | 19         | 1063,53 | 2125,05            |
| 12114 | IPI00418471 | 66,5   | 66,5      | E(M)EENFAVEAANYQDTIGR | 19         | 1101,99 | 2201,96            |
| 5070  | IPI00465248 | 35,2   | 35,2      | YDLDFK                | 6          | 400,69  | 799,37             |
| 2884  | IPI00465248 | 43,5   | 43,5      | SCNCLLLK              | 8          | 504,25  | 1006,49            |
| 2234  | IPI00465248 | 42,4   | 42,4      | LMIE(M)DGTENK         | 11         | 648,79  | 1295,57            |
| 10111 | IPI00465248 | 64,1   | 64,1      | GNPTVEVDLFTSK         | 13         | 703,86  | 1405,71            |
| 13045 | IPI00465248 | 77,8   | 77,8      | YISPDQLADLYK          | 12         | 713,37  | 1424,72            |
| 13545 | IPI00465248 | 84,5   | 84,5      | VVIG(M)DVAASEFFR      | 14         | 778,89  | 1555,77            |
| 6934  | IPI00465248 | 97,8   | 97,8      | VNQIGSVTESLQACK       | 15         | 817,41  | 1632,81            |
| 14040 | IPI00465248 | 98,2   | 98,2      | AAVPSGASTGIYEALRLR    | 18         | 902,98  | 1803,94            |
| 16045 | IPI00465248 | 52,7   | 52,7      | FTASAGIQVVGDDLTVTNPK  | 20         | 1017,03 | 2032,05            |
| 6276  | IPI00472102 | 61     | 61        | IGIEIHK               | 7          | 393,26  | 784,50             |

|                   |      |                                   |    |         |         |
|-------------------|------|-----------------------------------|----|---------|---------|
| 4275 IPI00472102  | 42,5 | 42,5 VGLQVVAVK                    | 9  | 456,80  | 911,58  |
| 6174 IPI00472102  | 49,1 | 49,1 EIGNIISDA(M)K                | 11 | 603,80  | 1205,59 |
| 4107 IPI00472102  | 44,7 | 44,7 NAGVEGSLIVEK                 | 12 | 608,33  | 1214,65 |
| 6979 IPI00472102  | 61,6 | 61,6 TVIIEQSWGSPK                 | 12 | 672,86  | 1343,71 |
| 16703 IPI00472102 | 85,5 | 85,5 TLNDELEIIEGMK                | 13 | 752,88  | 1503,75 |
| 13587 IPI00472102 | 85,1 | 85,1 TLNDELEIIEG(M)K              | 13 | 760,88  | 1519,74 |
| 13172 IPI00472102 | 63,9 | 63,9 AAVEEGIVLGGGCALLR            | 17 | 842,96  | 1683,90 |
| 14050 IPI00472102 | 56,8 | 56,8 ISSIQSIVPALEIANAHR           | 18 | 640,36  | 1918,06 |
| 19738 IPI00472102 | 57,8 | 57,8 AL(M)LQGVDLLADAVAVT(M)GPK    | 21 | 715,71  | 2144,11 |
| 21713 IPI00472102 | 39   | 39 TALLDAAGVASLLTTAEVVVTEIPK      | 25 | 828,14  | 2481,39 |
| 8436 IPI00472102  | 55   | 55 LVQDVANNTNEEAGDGTATVTLAR       | 25 | 854,09  | 2559,24 |
| 20923 IPI00472102 | 83,8 | 83,8 TALLDAAGVASLLTTAEVVVTEIPKEEK | 28 | 956,86  | 2867,57 |
| 7349 IPI00021439  | 37,3 | 37,3 AVFPSIVGR                    | 9  | 473,28  | 944,54  |
| 12457 IPI00021439 | 35,7 | 35,7 DLT DYL(M)K                  | 8  | 507,74  | 1013,47 |
| 2869 IPI00021439  | 51,4 | 51,4 GYSFTTTAER                   | 10 | 566,77  | 1131,52 |
| 4635 IPI00021439  | 49,3 | 49,3 EITALAPSTMK                  | 11 | 581,31  | 1160,61 |
| 2634 IPI00021439  | 47,9 | 47,9 EITALAPST(M)K                | 11 | 589,31  | 1176,60 |
| 4685 IPI00021439  | 51,2 | 51,2 IWHHTFYNELR                  | 11 | 505,92  | 1514,74 |
| 2636 IPI00021439  | 61,4 | 61,4 QEYDESGPSIVHR                | 13 | 758,85  | 1515,69 |
| 13200 IPI00021439 | 66,7 | 66,7 SYELPDGQVITIGNER             | 16 | 895,95  | 1789,89 |
| 8241 IPI00021439  | 58,9 | 58,9 VAPEEHPVLLTEAPLNPK           | 18 | 977,53  | 1953,05 |
| 8488 IPI00021439  | 41,9 | 41,9 YPIEHGIVTNWDD(M)EK           | 16 | 981,95  | 1961,88 |
| 16527 IPI00021439 | 61,2 | 61,2 DLYANTVLSGGTTMYPGIADR        | 21 | 1108,04 | 2214,07 |
| 14515 IPI00021439 | 95,8 | 95,8 DLYANTVLSGGTT(M)YPGIADR      | 21 | 1116,04 | 2230,06 |
| 8946 IPI00479186  | 30,6 | 30,6 GIFPVLCK                     | 8  | 467,26  | 932,51  |
| 7801 IPI00479186  | 53,1 | 53,1 GDLGIEIPA EK                 | 11 | 571,31  | 1140,60 |
| 5753 IPI00479186  | 53,6 | 53,6 ITLDNAYMEK                   | 10 | 599,29  | 1196,57 |
| 7169 IPI00479186  | 56,6 | 56,6 LDIDSPITAR                   | 11 | 599,33  | 1196,64 |
| 3584 IPI00479186  | 52,8 | 52,8 ITLDNAY(M)EK                 | 10 | 607,29  | 1212,57 |
| 5585 IPI00479186  | 49,2 | 49,2 NTGHICTIGPASR                | 13 | 680,35  | 1358,70 |

|                   |      |                              |    |         |         |
|-------------------|------|------------------------------|----|---------|---------|
| 9406 IPI00479186  | 60,8 | 60,8 TATESFASDPILYR          | 14 | 785,89  | 1569,77 |
| 11854 IPI00479186 | 90,1 | 90,1 GVNLPGAAVDLPAVSEK       | 17 | 818,95  | 1635,88 |
| 9183 IPI00479186  | 46   | 46 KGVNLPGAAVDLPAVSEK        | 18 | 883,00  | 1763,98 |
| 13787 IPI00479186 | 51,2 | 51,2 GADFLVTEVENGGSLGSK      | 18 | 890,44  | 1778,87 |
| 20073 IPI00479186 | 61,1 | 61,1 FGVEQDVD(M)VFASFIR      | 16 | 938,45  | 1874,88 |
| 17168 IPI00479186 | 89,9 | 89,9 LAPITSDPTEATAVGAVEASFK  | 22 | 1088,06 | 2174,11 |
| 15775 IPI00479186 | 40,3 | 40,3 TATESFASDPILYRPVAVALDTK | 23 | 822,44  | 2464,28 |
| 4307 IPI00180675  | 34,6 | 34,6 FDL(M)YAK               | 7  | 452,22  | 902,42  |
| 5493 IPI00180675  | 56,3 | 56,3 DVNAAIATIK              | 10 | 508,29  | 1014,57 |
| 14435 IPI00180675 | 68,2 | 68,2 EIIDLVLDR               | 9  | 543,31  | 1084,61 |
| 15405 IPI00180675 | 70,8 | 70,8 TIQFVDWCPTGFK           | 13 | 799,89  | 1597,76 |
| 16540 IPI00180675 | 64,4 | 64,4 AVFVDLEPTVIDEVR         | 15 | 851,46  | 1700,90 |
| 6869 IPI00180675  | 42,4 | 42,4 NLDIERPTYTNLNR          | 14 | 859,94  | 1717,87 |
| 12817 IPI00180675 | 59,5 | 59,5 IHFPLATYAPVISA EK       | 16 | 878,99  | 1755,96 |
| 11368 IPI00180675 | 43,8 | 43,8 VGINYQPPTVVPGGDLAK      | 18 | 913,00  | 1823,98 |
| 14750 IPI00180675 | 93,4 | 93,4 TIGGGDDSFNTFFSETGAGK    | 20 | 1004,45 | 2006,89 |
| 19555 IPI00180675 | 73   | 73 FDGALNVDLTEFQTNLVPYPR     | 21 | 1205,10 | 2408,19 |
| 15260 IPI00387144 | 52,3 | 52,3 SIQFVDWCPTGFK           | 13 | 792,88  | 1583,74 |
| 6391 IPI00302592  | 31,3 | 31,3 SPFEVYVDK               | 9  | 542,27  | 1082,53 |
| 8341 IPI00302592  | 47,8 | 47,8 LDVQFSGLTK              | 10 | 554,31  | 1106,60 |
| 3284 IPI00302592  | 54,3 | 54,3 EATTEFSVDAR             | 11 | 613,29  | 1224,56 |
| 18093 IPI00302592 | 75,7 | 75,7 LIALLEVLSQK             | 11 | 613,89  | 1225,76 |
| 6184 IPI00302592  | 32,8 | 32,8 LTVSSLQESGLK            | 12 | 631,35  | 1260,69 |
| 10396 IPI00302592 | 38,1 | 38,1 YGGDEIPFSPYR            | 12 | 700,83  | 1399,64 |
| 9581 IPI00302592  | 67,9 | 67,9 IANLQTDLS DGLR          | 13 | 708,38  | 1414,74 |
| 6524 IPI00302592  | 55,1 | 55,1 EAGAGGLAIAVEGPSK        | 16 | 713,88  | 1425,75 |
| 3456 IPI00302592  | 59,6 | 59,6 AFGPGLQGGSAGSPAR        | 16 | 715,36  | 1428,71 |
| 6036 IPI00302592  | 64,2 | 64,2 ANLPQSFQVDTSK           | 13 | 717,86  | 1433,72 |
| 9743 IPI00302592  | 38,2 | 38,2 DAGEGGLSLAIEGPSK        | 16 | 750,88  | 1499,74 |
| 12895 IPI00302592 | 36,2 | 36,2 SPFSVAVSPSLDLSK         | 15 | 767,41  | 1532,81 |

|                   |      |                                            |    |         |         |
|-------------------|------|--------------------------------------------|----|---------|---------|
| 6224 IPI00302592  | 58,7 | 58,7 GAGTGGLGLAVEGPSEAK                    | 18 | 785,91  | 1569,80 |
| 6044 IPI00302592  | 76,3 | 76,3 VANPSGNLTETYVQDR                      | 16 | 882,43  | 1762,85 |
| 8040 IPI00302592  | 42,3 | 42,3 VQVQDNEGCPVEALVK                      | 16 | 892,95  | 1783,88 |
| 13810 IPI00302592 | 40,9 | 40,9 EGPYSISVLYGDEEVPR                     | 17 | 955,46  | 1908,91 |
| 9828 IPI00302592  | 61,1 | 61,1 IPEISIQD(M)TAQVTSPSGK                 | 19 | 1009,51 | 2017,00 |
| 9126 IPI00302592  | 31,6 | 31,6 VHSPSGALEECYVTEIDQDK                  | 20 | 759,68  | 2276,03 |
| 16908 IPI00302592 | 33,7 | 33,7 ASGPGLNTTGVPASLPVEFTIDAK              | 24 | 1171,62 | 2341,22 |
| 13660 IPI00302592 | 38,3 | 38,3 FNEEHIPDSPFVVPVASPSGDAR               | 23 | 823,07  | 2466,18 |
| 15007 IPI00302592 | 39,7 | 39,7 LQVEPAVDTSGVQCYGPGIEGQGVFR            | 26 | 921,79  | 2762,34 |
| 14940 IPI00302592 | 42   | 42 FGGEHVPNSPFQVTALAGDQPSVQPPLR            | 28 | 982,50  | 2944,48 |
| 17190 IPI00302592 | 37,2 | 37,2 ALGALVDSCAPGLCPDWDSWDASKPVTNAR        | 30 | 1077,17 | 3228,49 |
| 18750 IPI00302592 | 51   | 51 EEGPYEVEVTDGVPVPGSPFPLEAVAPTKPSK        | 33 | 1162,58 | 3484,73 |
| 18550 IPI00302592 | 42,6 | 42,6 DGSCSVEYIPYEAGTYSLNVTYGGHQVPGSPFK     | 33 | 1193,89 | 3578,63 |
| 18593 IPI00302592 | 39,7 | 39,7 VEYTPYEGLHSVDVTDGSPVPSSPFQVPVTEGCDPSR | 39 | 1432,99 | 4295,95 |
| 3892 IPI00003865  | 30,5 | 30,5 EIAEAYLGK                             | 9  | 497,27  | 992,52  |
| 10997 IPI00003865 | 88   | 88 DAGTIAGLNVLRL                           | 12 | 600,34  | 1198,67 |
| 12084 IPI00003865 | 39,6 | 39,6 FEELNADLFR                            | 10 | 627,31  | 1252,61 |
| 2249 IPI00003865  | 66   | 66 FDDAVVQSD(M)K                           | 11 | 635,78  | 1269,55 |
| 5097 IPI00003865  | 98,7 | 98,7 SQIHDIIVLVGGSTR                       | 14 | 741,41  | 1480,80 |
| 6639 IPI00003865  | 68   | 68 TTPSYVAFTDTER                           | 13 | 744,35  | 1486,69 |
| 10948 IPI00003865 | 44,7 | 44,7 SFYPEEVSS(M)VLTK                      | 14 | 816,90  | 1631,78 |
| 11997 IPI00003865 | 88,4 | 88,4 IINEPTAAAIAYGLDK                      | 16 | 830,45  | 1658,89 |
| 4715 IPI00003865  | 76,5 | 76,5 NQVA(M)NPTNTVFDK                      | 15 | 833,40  | 1664,78 |
| 11671 IPI00003865 | 38,6 | 38,6 TVTNAVVTVPAYFNDSQR                    | 18 | 991,50  | 1980,99 |
| 19363 IPI00003865 | 58,2 | 58,2 SINPDEAVAYGAAVQAAILSGDK               | 23 | 1130,58 | 2259,14 |
| 8806 IPI00453473  | 64,3 | 64,3 VFLENVIR                              | 8  | 495,29  | 988,57  |
| 5458 IPI00453473  | 60,5 | 60,5 ISGLIYEETR                            | 10 | 590,81  | 1179,61 |
| 13887 IPI00453473 | 49,3 | 49,3 TVTAMDVVYALK                          | 12 | 655,85  | 1309,69 |
| 10391 IPI00453473 | 87,2 | 87,2 TVTA(M)DVVYALK                        | 12 | 663,85  | 1325,69 |
| 10166 IPI00011654 | 48,4 | 48,4 YLTVAAVFR                             | 9  | 520,30  | 1038,59 |

|                   |      |                                  |    |         |         |
|-------------------|------|----------------------------------|----|---------|---------|
| 6514 IPI00011654  | 35,1 | 35,1 FPGQLNADLR                  | 10 | 565,80  | 1129,59 |
| 3749 IPI00011654  | 45,4 | 45,4 ISVYYNEATGGK                | 12 | 651,32  | 1300,63 |
| 4592 IPI00011654  | 38   | 38 EVDEQMLNVQNK                  | 12 | 723,85  | 1445,68 |
| 10456 IPI00011654 | 39,1 | 39,1 AILVDLEPGT(M)DSVR           | 15 | 816,42  | 1630,82 |
| 15735 IPI00011654 | 55,3 | 55,3 ALTVPELTQQVFDK              | 15 | 830,45  | 1658,89 |
| 18480 IPI00011654 | 41   | 41 (M)AVTFIGNSTAIQELFK           | 17 | 943,49  | 1884,97 |
| 18025 IPI00011654 | 69,6 | 69,6 GHYTEGAELVDSVLDVVR          | 18 | 979,99  | 1957,97 |
| 19413 IPI00011654 | 33,5 | 33,5 LTTPTYGDLNHLVSATMSGVTTCLR   | 25 | 903,45  | 2707,33 |
| 17513 IPI00011654 | 52,9 | 52,9 LTTPTYGDLNHLVSAT(M)SGVTTCLR | 25 | 908,78  | 2723,33 |
| 18598 IPI00011654 | 37,7 | 37,7 SGPFQIFRPDNFVFGQSGAGNNWAK   | 26 | 933,45  | 2797,34 |
| 10720 IPI00334775 | 46,8 | 46,8 APFDLFENK                   | 9  | 540,77  | 1079,53 |
| 2366 IPI00334775  | 53   | 53 YLAEVAAGDDK                   | 11 | 576,28  | 1150,55 |
| 4165 IPI00334775  | 57,2 | 57,2 SIYYITGESK                  | 10 | 580,79  | 1159,57 |
| 5343 IPI00334775  | 47,3 | 47,3 SISLYYTGEK                  | 10 | 580,79  | 1159,57 |
| 6906 IPI00334775  | 39,6 | 39,6 IDIIPNPQER                  | 10 | 597,83  | 1193,64 |
| 9786 IPI00334775  | 57,7 | 57,7 ADLNNLGTIAK                 | 12 | 621,86  | 1241,70 |
| 2614 IPI00334775  | 46,1 | 46,1 EQVANSASFVER                | 11 | 625,31  | 1248,61 |
| 5713 IPI00334775  | 87,7 | 87,7 ELISNASDALDK                | 12 | 638,32  | 1274,63 |
| 7939 IPI00334775  | 65,4 | 65,4 TLTIVDTGIG(M)TK             | 13 | 683,37  | 1364,72 |
| 7939 IPI00334775  | 65,4 | 65,4 TLTLVDTGIG(M)TK             | 13 | 683,37  | 1364,72 |
| 11393 IPI00334775 | 74,3 | 74,3 GVVDSEDLPLNISR              | 14 | 757,40  | 1512,78 |
| 8618 IPI00334775  | 69,5 | 69,5 SLTNDWEDHLAVK               | 13 | 764,38  | 1526,74 |
| 10451 IPI00334775 | 86,5 | 86,5 NPDDITQEEYGEFYK             | 15 | 924,40  | 1846,79 |
| 8421 IPI00334775  | 43   | 43 YHTSQSGDEMTSLSEYVSR           | 19 | 726,32  | 2175,94 |
| 5293 IPI00334775  | 44,5 | 44,5 YHTSQSGDE(M)TSLSEYVSR       | 19 | 731,65  | 2191,93 |
| 18373 IPI00334775 | 68   | 68 GFEVVYMTEPIDEYCVQQLK          | 20 | 1224,58 | 2447,14 |
| 15857 IPI00334775 | 69   | 69 GFEVVY(M)TEPIDEYCVQQLK        | 20 | 1232,57 | 2463,13 |
| 4860 IPI00215965  | 42,4 | 42,4 DYFEQYGK                    | 8  | 525,23  | 1048,45 |
| 3639 IPI00215965  | 66   | 66 SSGPYGGGGQYFAK                | 14 | 688,31  | 1374,62 |
| 11563 IPI00215965 | 60   | 60 GFAFVTFDDHDSVVK               | 15 | 850,38  | 1698,75 |

|       |             |      |      |                                  |    |         |         |
|-------|-------------|------|------|----------------------------------|----|---------|---------|
| 17615 | IPI00215965 | 90,6 | 90,6 | LFIGGLSFETTDESLR                 | 16 | 892,96  | 1783,90 |
| 5353  | IPI00396485 | 45,6 | 45,6 | LPLQDVYK                         | 8  | 488,28  | 974,54  |
| 4565  | IPI00396485 | 59,7 | 59,7 | IGGIGTVPVGR                      | 11 | 513,31  | 1024,60 |
| 3975  | IPI00396485 | 53   | 53   | SGDAAIVD(M)VPGK                  | 13 | 638,32  | 1274,62 |
| 6474  | IPI00396485 | 67,9 | 67,9 | YYVTIIDAPGHR                     | 12 | 702,87  | 1403,72 |
| 10131 | IPI00396485 | 69,5 | 69,5 | P(M)CVESFSDYPPLGR                | 15 | 885,89  | 1769,77 |
| 13405 | IPI00396485 | 37,2 | 37,2 | VETGVLKPG(M)VVTFAPVNVTTTEVK      | 24 | 844,46  | 2530,37 |
| 19695 | IPI00396485 | 57,8 | 57,8 | DGNASGTTLLEALDCILPPTTRPTDK       | 25 | 885,78  | 2654,31 |
| 16230 | IPI00396485 | 46,5 | 46,5 | SGDAAIVDMVPGKP(M)CVESFSDYPPLGR   | 28 | 1004,47 | 3010,39 |
| 19253 | IPI00396485 | 93,9 | 93,9 | DGNASGTTLLEALDCILPPTTRPTDKPLR    | 28 | 1007,86 | 3020,56 |
| 13867 | IPI00396485 | 51   | 51   | SGDAAIVD(M)VPGKP(M)CVESFSDYPPLGR | 28 | 1009,80 | 3026,38 |
| 9066  | IPI00007752 | 31,2 | 31,2 | AVLVDLEPGT(M)DSVR                | 15 | 809,41  | 1616,81 |
| 10628 | IPI00021405 | 38   | 38   | DLEALLNSK                        | 9  | 501,78  | 1001,54 |
| 6424  | IPI00021405 | 54,2 | 54,2 | LADALQELR                        | 9  | 514,79  | 1027,57 |
| 3484  | IPI00021405 | 30,9 | 30,9 | EAALSTALSEK                      | 11 | 560,30  | 1118,58 |
| 2876  | IPI00021405 | 61,1 | 61,1 | AAEAEELGDAR                      | 11 | 583,28  | 1164,54 |
| 9981  | IPI00021405 | 48,7 | 48,7 | IDSLSAQLSQLQK                    | 13 | 715,90  | 1429,78 |
| 4155  | IPI00021405 | 85   | 85   | TALINSTGEEVA(M)R                 | 14 | 754,37  | 1506,73 |
| 5795  | IPI00021405 | 54,3 | 54,3 | SNEDQSMGNWQIK                    | 13 | 768,84  | 1535,67 |
| 2809  | IPI00021405 | 62,4 | 62,4 | SNEDQS(M)GNWQIK                  | 13 | 776,84  | 1551,66 |
| 5708  | IPI00021405 | 88,8 | 88,8 | SVGGSGGGSFGDNLVTR                | 17 | 783,88  | 1565,74 |
| 4577  | IPI00021405 | 49   | 49   | NSNLVGAAHEELQQR                  | 16 | 876,93  | 1751,85 |
| 14707 | IPI00021405 | 53,6 | 53,6 | (M)QQQLDEYQELLDIK                | 15 | 955,46  | 1908,91 |
| 2321  | IPI00418169 | 38,3 | 38,3 | AYTNFDAER                        | 9  | 543,75  | 1085,48 |
| 7979  | IPI00418169 | 49,2 | 49,2 | DALNIETAIK                       | 10 | 544,30  | 1086,59 |
| 12287 | IPI00418169 | 56,8 | 56,8 | SEIDLFNIR                        | 9  | 553,80  | 1105,58 |
| 2396  | IPI00418169 | 44,1 | 44,1 | TPAQYDASELK                      | 11 | 611,80  | 1221,59 |
| 1976  | IPI00418169 | 74   | 74   | TNQELQEINR                       | 10 | 622,81  | 1243,61 |
| 8118  | IPI00418169 | 38,8 | 38,8 | SLYYYIQQDTK                      | 11 | 711,35  | 1420,69 |
| 9988  | IPI00418169 | 38,3 | 38,3 | SYSYD(M)LESIR                    | 12 | 738,84  | 1475,66 |



|       |             |      |      |                       |    |         |         |
|-------|-------------|------|------|-----------------------|----|---------|---------|
| 17858 | IPI00418169 | 63,6 | 63,6 | GVDEVTIVNILTNR        | 14 | 771,93  | 1541,84 |
| 19235 | IPI00418169 | 64   | 64   | SALSGHLETVILGLLK      | 16 | 825,99  | 1649,97 |
| 18578 | IPI00418169 | 63   | 63   | GLGTDEDSLIEIICSR      | 16 | 889,44  | 1776,86 |
| 20230 | IPI00418169 | 85,9 | 85,9 | GDLENAFLNLVQCIQNK     | 17 | 988,50  | 1974,98 |
| 10546 | IPI00418169 | 43,1 | 43,1 | RAEDGSVIDYELIDQDAR    | 18 | 689,00  | 2063,98 |
| 5900  | IPI00444262 | 34,7 | 34,7 | TGISDVFAK             | 9  | 469,25  | 936,49  |
| 4452  | IPI00444262 | 54,9 | 54,9 | NDLAVVDVR             | 9  | 500,77  | 999,53  |
| 5310  | IPI00444262 | 38,7 | 38,7 | SISLYYTGEK            | 10 | 580,79  | 1159,57 |
| 6264  | IPI00444262 | 59,1 | 59,1 | EVFEDAAEIR            | 10 | 589,79  | 1177,56 |
| 2989  | IPI00444262 | 66,6 | 66,6 | GLSEDTTEETLK          | 12 | 661,82  | 1321,62 |
| 12497 | IPI00444262 | 87,9 | 87,9 | GFGFVDFNSEEDAK        | 14 | 781,35  | 1560,68 |
| 14210 | IPI00444262 | 94,9 | 94,9 | FGYVDFESAEDLEK        | 14 | 824,87  | 1647,73 |
| 19460 | IPI00444262 | 65,7 | 65,7 | VEGTEPTTAFNLFVGNLNFNK | 21 | 1156,58 | 2311,14 |
| 8653  | IPI00021428 | 31,9 | 31,9 | YPIEHGIITNWDD(M)EK    | 16 | 988,96  | 1975,90 |
| 5931  | IPI00003362 | 44,8 | 44,8 | DAGTIAGLNV(M)R        | 12 | 617,32  | 1232,62 |
| 8883  | IPI00003362 | 58,3 | 58,3 | NELESYAYSLK           | 11 | 658,82  | 1315,63 |
| 11204 | IPI00003362 | 50,8 | 50,8 | FEELN(M)DLFR          | 10 | 665,31  | 1328,61 |
| 11741 | IPI00003362 | 61,4 | 61,4 | ELEEIVQPIISK          | 12 | 699,40  | 1396,78 |
| 5050  | IPI00003362 | 50   | 50   | TWNDPSVQQDIK          | 12 | 715,85  | 1429,68 |
| 8371  | IPI00003362 | 61,8 | 61,8 | ITPSYVAFTPEGER        | 14 | 783,89  | 1565,77 |
| 6819  | IPI00003362 | 66,6 | 66,6 | NQLTSNPENTVFDK        | 15 | 839,41  | 1676,80 |
| 5583  | IPI00021263 | 32,5 | 32,5 | NLLSVAYK              | 8  | 454,27  | 906,52  |
| 2394  | IPI00021263 | 39   | 39   | YLAEVAAGDDK           | 11 | 576,28  | 1150,55 |
| 17508 | IPI00021263 | 55,8 | 55,8 | DSTLIMQLLR            | 10 | 595,33  | 1188,65 |
| 17493 | IPI00021263 | 48,7 | 48,7 | DSTLI(M)QLLR          | 10 | 603,33  | 1204,65 |
| 19700 | IPI00021263 | 44,1 | 44,1 | DICNDVLSLLEK          | 12 | 709,86  | 1417,71 |
| 2286  | IPI00021263 | 88,7 | 88,7 | SVTEQGAELSNEER        | 14 | 774,86  | 1547,71 |
| 15075 | IPI00021263 | 97,1 | 97,1 | GIVDQSQQAYQEAFEISK    | 18 | 1021,00 | 2039,98 |
| 5080  | IPI00019502 | 43,6 | 43,6 | VVFQEFR               | 7  | 462,75  | 923,49  |
| 9447  | IPI00019502 | 41,5 | 41,5 | GDLPFVVPR             | 9  | 500,28  | 998,55  |

|                   |      |                             |    |         |         |
|-------------------|------|-----------------------------|----|---------|---------|
| 3136 IPI00019502  | 45,9 | 45,9 LEVNLQA(M)K            | 9  | 531,29  | 1060,56 |
| 4262 IPI00019502  | 51,5 | 51,5 FDQLLAEEK              | 9  | 546,78  | 1091,55 |
| 3935 IPI00019502  | 57   | 57 KFDQLLAEEK               | 10 | 610,83  | 1219,64 |
| 5695 IPI00019502  | 55,2 | 55,2 VEAQLQELQVK            | 11 | 642,86  | 1283,71 |
| 18160 IPI00019502 | 77   | 77 VISGVLQLGNIVFK           | 14 | 743,95  | 1485,89 |
| 6214 IPI00019502  | 73,6 | 73,6 IAQLEEQLDNETK          | 13 | 765,89  | 1529,76 |
| 3171 IPI00019502  | 64,5 | 64,5 EDQSILCTGESGAGK        | 15 | 776,35  | 1550,69 |
| 7762 IPI00019502  | 40,9 | 40,9 IAEFTTNLTETEEEK        | 14 | 827,40  | 1652,78 |
| 6084 IPI00019502  | 61,4 | 61,4 (M)EDSVGCLETAEVK       | 15 | 856,87  | 1711,73 |
| 19130 IPI00019502 | 29,3 | 29,3 IIGLDQVAGMSETALPGAFK   | 20 | 1009,53 | 2017,05 |
| 16683 IPI00019502 | 33,9 | 33,9 IIGLDQVAG(M)SETALPGAFK | 20 | 1017,53 | 2033,05 |
| 12599 IPI00019502 | 40,2 | 40,2 VED(M)AELTCLNEASVLHNLK | 20 | 768,04  | 2301,10 |
| 14042 IPI00019502 | 58,3 | 58,3 (M)QQNIQELEEQLLEEEESAR | 19 | 1175,03 | 2348,05 |
| 2504 IPI00419585  | 39,7 | 39,7 TEWLDGK                | 7  | 424,71  | 847,41  |
| 10896 IPI00419585 | 65,5 | 65,5 VSFELFADK              | 9  | 528,27  | 1054,53 |
| 8911 IPI00419585  | 39,8 | 39,8 FEDENFILK              | 9  | 577,79  | 1153,56 |
| 4940 IPI00419585  | 57   | 57 KITIADCGQLE              | 11 | 624,32  | 1246,62 |
| 5825 IPI00419585  | 63,1 | 63,1 EG(M)NIVEAMER          | 11 | 647,79  | 1293,57 |
| 19453 IPI00419585 | 82   | 82 VNPTVFFDIAVDGEPLGR       | 18 | 973,50  | 1944,99 |
| 4172 IPI00554648  | 38   | 38 LQAEIEGLK                | 9  | 500,79  | 999,56  |
| 5290 IPI00554648  | 31,5 | 31,5 WSLQQQK                | 8  | 515,79  | 1029,56 |
| 7004 IPI00554648  | 54,1 | 54,1 LSELEAALQR             | 10 | 565,31  | 1128,61 |
| 2246 IPI00554648  | 36,7 | 36,7 EYQEL(M)NVK            | 9  | 585,28  | 1168,54 |
| 3920 IPI00554648  | 37,2 | 37,2 LVSESSDVLPK            | 11 | 587,32  | 1172,63 |
| 9163 IPI00554648  | 64,6 | 64,6 SLD(M)DSIIAEVK         | 12 | 668,84  | 1335,66 |
| 9281 IPI00554648  | 82,3 | 82,3 ASLEAAIADAEQR          | 13 | 672,84  | 1343,67 |
| 16085 IPI00554648 | 88,4 | 88,4 LEGLTDEINFLR           | 12 | 710,38  | 1418,74 |
| 12992 IPI00554648 | 51   | 51 SN(M)DN(M)FESYINNLR      | 15 | 940,40  | 1878,79 |
| 2859 IPI00396378  | 35,2 | 35,2 GGNFGFGDSR             | 10 | 507,22  | 1012,43 |
| 9971 IPI00396378  | 86,3 | 86,3 IDTIEIITDR             | 10 | 594,83  | 1187,64 |

|                   |      |                                  |    |         |         |
|-------------------|------|----------------------------------|----|---------|---------|
| 12162 IPI00396378 | 67,5 | 67,5 GFGFVTFDDHDPVDK             | 15 | 848,39  | 1694,76 |
| 17633 IPI00396378 | 80,5 | 80,5 LFIGGLSFETTEESLR            | 16 | 899,96  | 1797,91 |
| 3659 IPI00396378  | 74,9 | 74,9 N(M)GGPYGGGNYGPGGSGGSGGYGGR | 25 | 1103,45 | 2204,89 |
| 17470 IPI00013508 | 51,6 | 51,6 LASDLLEWIR                  | 10 | 608,34  | 1214,66 |
| 3024 IPI00013508  | 31,7 | 31,7 DHSGLTGPEEFK                | 12 | 658,81  | 1315,60 |
| 17638 IPI00013508 | 69   | 69 GYEEWLLNEIR                   | 11 | 711,36  | 1420,70 |
| 8533 IPI00013508  | 66,8 | 66,8 TINEVENQILTR                | 12 | 715,39  | 1428,76 |
| 19490 IPI00013508 | 73,5 | 73,5 VGYTPDWIFLLR                | 12 | 740,40  | 1478,79 |
| 10707 IPI00013508 | 65,9 | 65,9 AGTQIENIEEDFR               | 13 | 761,36  | 1520,71 |
| 10231 IPI00013508 | 77,3 | 77,3 FAIQDISVEETSAK              | 14 | 769,39  | 1536,77 |
| 19198 IPI00013508 | 83,2 | 83,2 LLETIDQLYLEYAK              | 14 | 856,46  | 1710,91 |
| 16938 IPI00013508 | 65,9 | 65,9 IDQLEGDHQLIQEALIFDNK        | 20 | 780,40  | 2338,18 |
| 17163 IPI00220740 | 61,1 | 61,1 (M)TDQEAIQDLWQWR            | 14 | 918,42  | 1834,83 |
| 14477 IPI00220740 | 76   | 76 DELHIVEAEA(M)NYEGSPIK         | 19 | 1081,01 | 2160,01 |
| 19240 IPI00220740 | 63,5 | 63,5 MSVQPTVSLGGFEITPPVVLR       | 21 | 1114,11 | 2226,21 |
| 19018 IPI00220740 | 80,1 | 80,1 (M)SVQPTVSLGGFEITPPVVLR     | 21 | 1122,11 | 2242,20 |
| 7752 IPI00007765  | 50,6 | 50,6 VQQTVDLDFGR                 | 11 | 645,84  | 1289,67 |
| 15460 IPI00007765 | 63   | 63 AQFEGIVTDLIR                  | 12 | 681,37  | 1360,73 |
| 6761 IPI00007765  | 41,4 | 41,4 TTPSVVAFTADGER              | 14 | 725,86  | 1449,71 |
| 10428 IPI00007765 | 53,1 | 53,1 SDIGEVILVGG(M)TR            | 14 | 731,88  | 1461,75 |
| 17465 IPI00007765 | 35,6 | 35,6 LLGQFTLIGIPPAPR             | 15 | 796,98  | 1591,94 |
| 11593 IPI00007765 | 91,1 | 91,1 VINEPTAAALAYGLDK            | 16 | 823,44  | 1644,87 |
| 4062 IPI00186290  | 40,6 | 40,6 FSVSPVVR                    | 8  | 445,76  | 889,50  |
| 4840 IPI00186290  | 35,3 | 35,3 GVQYLNEIK                   | 9  | 532,29  | 1062,57 |
| 6389 IPI00186290  | 60,6 | 60,6 VNFTVDQIR                   | 9  | 546,30  | 1090,58 |
| 15787 IPI00186290 | 33,9 | 33,9 EGIPALDNFLDK                | 12 | 666,34  | 1330,67 |
| 5600 IPI00186290  | 53,9 | 53,9 DLEEDHACIPIK                | 12 | 720,34  | 1438,67 |
| 18875 IPI00186290 | 72,8 | 72,8 TFCQLILDPIFK                | 12 | 747,90  | 1493,79 |
| 7359 IPI00186290  | 44,9 | 44,9 ETVSEESNVLCLSK              | 14 | 797,89  | 1593,76 |
| 19193 IPI00186290 | 63,1 | 63,1 IWCFGPDGTGPNILTDITK         | 19 | 1053,02 | 2104,03 |

|                   |      |                                       |    |         |         |
|-------------------|------|---------------------------------------|----|---------|---------|
| 19583 IPI00186290 | 70,6 | 70,6 ALLELQLEPEELYQTFQR               | 18 | 1110,58 | 2219,14 |
| 20218 IPI00186290 | 46,2 | 46,2 L(M)EPIYLVEIQCPVGGIYGVLR         | 26 | 1002,52 | 3004,53 |
| 11300 IPI00382470 | 40   | 40 APFDLFENR                          | 9  | 554,78  | 1107,54 |
| 3021 IPI00382470  | 55,3 | 55,3 DQVANSFAVER                      | 11 | 618,30  | 1234,59 |
| 9041 IPI00382470  | 33,3 | 33,3 HLEINPDHSIETLR                   | 15 | 596,32  | 1785,94 |
| 2944 IPI00218918  | 39,2 | 39,2 PAFFAEK                          | 7  | 405,21  | 808,41  |
| 5273 IPI00218918  | 75,7 | 75,7 TPAQFDADEL                       | 11 | 631,80  | 1261,59 |
| 18888 IPI00218918 | 48   | 48 GVDEATHIDILTK                      | 13 | 463,26  | 1386,76 |
| 14995 IPI00218918 | 64,1 | 64,1 GTDVNVFNTILTTR                   | 14 | 775,91  | 1549,81 |
| 19578 IPI00218918 | 54,7 | 54,7 ALTGHLEEVVLALLK                  | 15 | 535,99  | 1604,95 |
| 19288 IPI00218918 | 75   | 75 GLGTDEDTLIEILASR                   | 16 | 851,95  | 1701,88 |
| 16365 IPI00218918 | 47,2 | 47,2 MYGISLCQAILDETK                  | 15 | 871,43  | 1740,84 |
| 10916 IPI00218918 | 51,5 | 51,5 GPGSAVSPYPTFNPSSDVAALHK          | 24 | 786,06  | 2355,15 |
| 12920 IPI00304925 | 29,9 | 29,9 DAGVIAGLNVL                      | 12 | 599,35  | 1196,69 |
| 2444 IPI00304925  | 49,2 | 49,2 FGDPVVQSD(M)K                    | 11 | 619,79  | 1237,56 |
| 7750 IPI00304925  | 58,9 | 58,9 NQVALNPQNTVFDK                   | 15 | 829,93  | 1657,84 |
| 12574 IPI00304925 | 87,2 | 87,2 IINEPTAAAIAYGLDR                 | 16 | 844,46  | 1686,90 |
| 18073 IPI00304925 | 59,1 | 59,1 ELEQVCNPIISGLYQGAGGPGGFGAQGPK    | 31 | 1019,17 | 3054,48 |
| 6811 IPI00303476  | 50,7 | 50,7 IGLFGGAGVGK                      | 11 | 488,28  | 974,55  |
| 9061 IPI00303476  | 34,5 | 34,5 VVDLLAPYAK                       | 10 | 544,82  | 1087,63 |
| 6161 IPI00303476  | 47,7 | 47,7 I(M)NVIGEPIDER                   | 12 | 701,35  | 1400,69 |
| 11012 IPI00303476 | 65,3 | 65,3 FTQAGSEVSALLGR                   | 14 | 718,38  | 1434,75 |
| 16502 IPI00303476 | 35,2 | 35,2 TVLI(M)ELINNVAK                  | 13 | 737,42  | 1472,83 |
| 10423 IPI00303476 | 58,3 | 58,3 LVLEVAQHLGESTVR                  | 15 | 825,96  | 1649,91 |
| 16593 IPI00303476 | 60,5 | 60,5 AIAELGIYPAVDPLDSTSR              | 19 | 994,52  | 1987,03 |
| 20135 IPI00303476 | 30,1 | 30,1 SLQDIHAILG(M)DELSEEDKLTVSR       | 24 | 897,79  | 2690,36 |
| 19443 IPI00303476 | 29,5 | 29,5 GFQQILAGEYDHLPEQAFY(M)VGPIEEAVAK | 30 | 1122,88 | 3365,63 |
| 2336 IPI00220642  | 30   | 30 YLAEVATGEK                         | 10 | 540,78  | 1079,55 |
| 5210 IPI00220642  | 82,7 | 82,7 NVTELNEPLSNEER                   | 14 | 822,40  | 1642,78 |
| 15812 IPI00169383 | 49,2 | 49,2 VLPGVDALSNI                      | 11 | 549,31  | 1096,61 |

|       |             |      |      |                            |    |         |         |
|-------|-------------|------|------|----------------------------|----|---------|---------|
| 10078 | IPI00169383 | 36,4 | 36,4 | YSLEPVAVELK                | 11 | 624,35  | 1246,68 |
| 13820 | IPI00169383 | 70,4 | 70,4 | ITLPVDFVTADK               | 12 | 659,87  | 1317,72 |
| 5615  | IPI00169383 | 97,2 | 97,2 | GCITHGGGDTATCCAK           | 17 | 877,90  | 1753,78 |
| 14630 | IPI00169383 | 68,4 | 68,4 | ACANPAAGSVILLENLR          | 17 | 884,97  | 1767,93 |
| 8858  | IPI00023748 | 91,5 | 91,5 | SPASDTYIVFGGEAK            | 14 | 742,87  | 1483,72 |
| 6844  | IPI00023748 | 90,1 | 90,1 | IEDLSQQAQLAAAEK            | 15 | 807,92  | 1613,83 |
| 3081  | IPI00000816 | 35,7 | 35,7 | EAAENSLVAYK                | 11 | 597,80  | 1193,59 |
| 4920  | IPI00000816 | 33,7 | 33,7 | YLAEFATGNDR                | 11 | 628,80  | 1255,58 |
| 17713 | IPI00000816 | 85,9 | 85,9 | LICCDILDVLDK               | 12 | 738,88  | 1475,74 |
| 9116  | IPI00219018 | 86   | 86   | VPTANVSVDLTCR              | 14 | 765,90  | 1529,79 |
| 15575 | IPI00219018 | 54,5 | 54,5 | LVINGNPITIFQER             | 14 | 807,45  | 1612,89 |
| 8203  | IPI00013808 | 40,6 | 40,6 | AGTQIENIDEDFR              | 13 | 754,35  | 1506,70 |
| 2889  | IPI00291175 | 49,1 | 49,1 | TDAGFTLR                   | 8  | 440,73  | 879,44  |
| 6446  | IPI00291175 | 45,2 | 45,2 | SLGEISALTSK                | 11 | 553,31  | 1104,60 |
| 4387  | IPI00291175 | 32,3 | 32,3 | NQWIDNVEK                  | 9  | 573,28  | 1144,55 |
| 5025  | IPI00291175 | 43,6 | 43,6 | ETVQTTEDQILK               | 12 | 702,86  | 1403,71 |
| 13715 | IPI00291175 | 78,6 | 78,6 | VDQLTAQLADLAAR             | 14 | 742,91  | 1483,80 |
| 20598 | IPI00291175 | 38,9 | 38,9 | AIPDLTAPVAAVQAAVSNLVR      | 21 | 1038,59 | 2075,17 |
| 9556  | IPI00024067 | 52   | 52   | NNLAGAEELFAR               | 12 | 652,83  | 1303,65 |
| 17023 | IPI00024067 | 48   | 48   | NLQNLLILTAIK               | 12 | 677,43  | 1352,84 |
| 8603  | IPI00024067 | 56,9 | 56,9 | LECSEELGDLVK               | 12 | 696,34  | 1390,66 |
| 12277 | IPI00024067 | 53,4 | 53,4 | GQFSTDELVAEVEK             | 14 | 776,38  | 1550,75 |
| 20210 | IPI00024067 | 47   | 47   | AF(M)TADLPNELIELLEK        | 17 | 982,01  | 1962,00 |
| 16242 | IPI00024067 | 38,8 | 38,8 | GQCDLELINVCNENSLFK         | 18 | 1077,00 | 2151,99 |
| 19103 | IPI00024067 | 55,8 | 55,8 | RPLIDQVVQTALSETQDPEEVSVTVK | 26 | 961,18  | 2880,50 |
| 6399  | IPI00010896 | 47,6 | 47,6 | GVTFNVTTVDTK               | 12 | 641,34  | 1280,66 |
| 18310 | IPI00010896 | 36,2 | 36,2 | IEEFLEAVLCPPR              | 13 | 524,94  | 1571,80 |
| 14972 | IPI00010896 | 53,7 | 53,7 | LAALNPESNTAGLDIFAK         | 18 | 922,99  | 1843,97 |
| 17838 | IPI00010896 | 61,5 | 61,5 | FLDGNELTLADCNLLPK          | 17 | 966,99  | 1931,96 |
| 14505 | IPI00291006 | 60,1 | 60,1 | IFGVTTLDIVR                | 11 | 617,36  | 1232,71 |

|                   |      |                                      |    |         |         |
|-------------------|------|--------------------------------------|----|---------|---------|
| 8786 IPI00291006  | 45,4 | 45,4 GCDVVVIPAGVPR                   | 13 | 669,86  | 1337,71 |
| 3479 IPI00291006  | 85,9 | 85,9 AGAGSATLS(M)AYAGAR              | 16 | 735,85  | 1469,69 |
| 10805 IPI00291006 | 60,6 | 60,6 GYLGPEQLPDCLK                   | 13 | 745,37  | 1488,73 |
| 14022 IPI00291006 | 38,3 | 38,3 VDFPQDQLTALTGR                  | 14 | 780,90  | 1559,79 |
| 18993 IPI00291006 | 45,8 | 45,8 VAVLGASGGIGQPLSLLK              | 19 | 897,05  | 1792,08 |
| 14597 IPI00291006 | 47   | 47 SQETECTYFSTPLLLGK                 | 17 | 987,48  | 1972,94 |
| 16265 IPI00291006 | 46,7 | 46,7 LTLYDIAHTPGVAADLSHIETK          | 22 | 789,08  | 2364,23 |
| 18483 IPI00299571 | 53,4 | 53,4 TGEAIVDAALSALR                  | 14 | 693,88  | 1385,75 |
| 12004 IPI00299571 | 79,4 | 79,4 GSFSEQGINEFLR                   | 13 | 742,36  | 1482,71 |
| 12717 IPI00299571 | 58,7 | 58,7 LAAVDATVNQVLASR                 | 15 | 764,43  | 1526,84 |
| 8988 IPI00299571  | 81,1 | 81,1 GSTAPVGGGAFPTIVER               | 17 | 808,43  | 1614,84 |
| 4450 IPI00179330  | 59,9 | 59,9 ESTLHLVLR                       | 9  | 534,31  | 1066,61 |
| 2539 IPI00179330  | 30,1 | 30,1 TLSDYNIQK                       | 9  | 541,28  | 1080,54 |
| 11122 IPI00179330 | 88,2 | 88,2 TITLEVEPSDTIENVK                | 16 | 894,47  | 1786,92 |
| 2836 IPI00018146  | 49,8 | 49,8 YLAEVACGDDR                     | 11 | 634,78  | 1267,55 |
| 18835 IPI00018146 | 80   | 80 SICTTVLELLDK                      | 12 | 696,37  | 1390,74 |
| 10001 IPI00018146 | 36,5 | 36,5 QTIDNSQGAYQEAFDISK              | 18 | 1007,97 | 2013,93 |
| 8836 IPI00025512  | 33,3 | 33,3 GPSWDPFR                        | 8  | 481,23  | 960,44  |
| 12454 IPI00025512 | 56,6 | 56,6 LFDQAFGLPR                      | 10 | 582,31  | 1162,61 |
| 12542 IPI00025512 | 57,8 | 57,8 LATQSNEITIPVTFESR               | 17 | 953,50  | 1904,99 |
| 19398 IPI00025512 | 73,7 | 73,7 LPEEWSQWLGGSSWPGYVR             | 19 | 1117,54 | 2233,06 |
| 17620 IPI00025512 | 51,5 | 51,5 YTLPPGVDPTQVSSSLSPGTLTVEAP(M)PK | 30 | 1038,86 | 3113,55 |
| 15467 IPI00025512 | 51   | 51 KYTLPPGVDPTQVSSSLSPGTLTVEAP(M)PK  | 31 | 1081,55 | 3241,64 |
| 16555 IPI00014230 | 63,6 | 63,6 AFVDFLSDEIK                     | 11 | 642,33  | 1282,64 |
| 15590 IPI00014230 | 45,3 | 45,3 AFVDFLSDEIKEER                  | 14 | 849,42  | 1696,83 |
| 16878 IPI00014230 | 40,7 | 40,7 VEEQEPELTSTPNFVVEVIK            | 20 | 1144,09 | 2286,16 |
| 17835 IPI00014230 | 68,3 | 68,3 ALVLDCHYPEDEVGQEDEAESDIFSIR     | 27 | 1046,14 | 3135,39 |
| 3627 IPI00008274  | 31,8 | 31,8 KEPAVLELEGK                     | 11 | 404,90  | 1211,67 |
| 13260 IPI00008274 | 41,7 | 41,7 LSDLLAPISEQIK                   | 13 | 713,91  | 1425,81 |
| 3444 IPI00008274  | 38,9 | 38,9 E(M)NDAA(M)FYTNR                | 12 | 747,80  | 1493,59 |

|                   |      |                              |    |         |         |
|-------------------|------|------------------------------|----|---------|---------|
| 12257 IPI00008274 | 91,2 | 91,2 VENQENVSNLVIEDTELK      | 18 | 1037,02 | 2072,03 |
| 5148 IPI00465028  | 62,9 | 62,9 HVFGESDELIGQK           | 13 | 729,86  | 1457,71 |
| 15170 IPI00465028 | 61   | 61 VVLAYEPVWAIGTGK           | 15 | 801,95  | 1601,88 |
| 15400 IPI00465028 | 65   | 65 VPADTEVVCAPPTAYIDFAR      | 20 | 1096,54 | 2191,06 |
| 13847 IPI00011274 | 49,4 | 49,4 GFGFVLFK                | 8  | 457,76  | 913,51  |
| 12877 IPI00011274 | 58,5 | 58,5 GFCFITYTDEEPVK          | 14 | 853,39  | 1704,77 |
| 8863 IPI00011274  | 50,6 | 50,6 VFVGGLSPDTSEEQIK        | 16 | 853,44  | 1704,86 |
| 18925 IPI00011274 | 52,8 | 52,8 EYFGAFGEIENIELP(M)DTK   | 19 | 1110,01 | 2218,01 |
| 12044 IPI00028888 | 41,4 | 41,4 GFCFITFK                | 8  | 510,25  | 1018,50 |
| 5929 IPI00028888  | 43,3 | 43,3 FGEVVDCTIK              | 10 | 584,29  | 1166,56 |
| 5929 IPI00028888  | 43,3 | 43,3 FGEVVDCTLK              | 10 | 584,29  | 1166,56 |
| 7821 IPI00028888  | 75,9 | 75,9 IFVGGLSPDTPEEK          | 14 | 744,89  | 1487,76 |
| 5315 IPI00440493  | 37   | 37 VVDALGNAIDGK              | 12 | 586,32  | 1170,62 |
| 9713 IPI00440493  | 42,6 | 42,6 TSIAIDTIINQK            | 12 | 658,87  | 1315,73 |
| 3289 IPI00440493  | 74,1 | 74,1 TGTAE(M)SSILEER         | 13 | 720,34  | 1438,66 |
| 8931 IPI00440493  | 43,3 | 43,3 ILGADTSVDLEETGR         | 15 | 788,40  | 1574,78 |
| 14910 IPI00440493 | 58,5 | 58,5 TGAIVDVPVGEELLGR        | 16 | 812,95  | 1623,88 |
| 15707 IPI00440493 | 50,7 | 50,7 G(M)SLNLEPDNVGVVVFNDK   | 20 | 1060,52 | 2119,03 |
| 2466 IPI00297779  | 56,6 | 56,6 ILIANTG(M)DTDK          | 12 | 654,33  | 1306,64 |
| 5668 IPI00297779  | 70,7 | 70,7 GATQQILDEAER            | 12 | 665,83  | 1329,65 |
| 5770 IPI00297779  | 46,3 | 46,3 EALLSSAVDHGSDEVK        | 16 | 828,91  | 1655,80 |
| 18615 IPI00297779 | 68,1 | 68,1 LGGSLADSYLDEGFLLDK      | 18 | 956,98  | 1911,94 |
| 9001 IPI00329801  | 40,5 | 40,5 GTVTDFPGFDER            | 12 | 670,81  | 1339,60 |
| 19510 IPI00329801 | 65,4 | 65,4 GLGTDEESILTLTSTR        | 16 | 852,95  | 1703,89 |
| 3084 IPI00216049  | 41,4 | 41,4 GSDFDCELR               | 9  | 549,73  | 1097,44 |
| 16705 IPI00216049 | 68,8 | 68,8 IILD LISESPIK           | 12 | 670,90  | 1339,79 |
| 4970 IPI00216049  | 44,3 | 44,3 TDYNASVSVPDSSGPER       | 17 | 890,90  | 1779,79 |
| 13945 IPI00216049 | 58,8 | 58,8 GSYGDLGGPIITTQVTIPK     | 19 | 959,02  | 1916,03 |
| 18608 IPI00216049 | 31,1 | 31,1 IITITGTQDQIQNAQYLLQNSVK | 23 | 863,80  | 2588,38 |
| 2731 IPI00013881  | 53,2 | 53,2 VHIEIGPDGR              | 10 | 546,79  | 1091,57 |

|       |             |      |      |                            |    |         |         |
|-------|-------------|------|------|----------------------------|----|---------|---------|
| 15150 | IPI00013881 | 80   | 80   | STGEAFVQFASQEIAEK          | 17 | 921,45  | 1840,89 |
| 19203 | IPI00013881 | 68,5 | 68,5 | ATENDIYNFFSPLNPVR          | 17 | 998,99  | 1995,97 |
| 9136  | IPI00027230 | 45,5 | 45,5 | SILFVPTSAPR                | 11 | 594,34  | 1186,67 |
| 9956  | IPI00027230 | 51,9 | 51,9 | GVVDSDDLPLNVSR             | 14 | 743,38  | 1484,75 |
| 11293 | IPI00027230 | 54,5 | 54,5 | EEEAIQLDGLNASQIR           | 16 | 893,45  | 1784,89 |
| 18913 | IPI00027230 | 40,9 | 40,9 | KGYEVIYLTEPVDEYCIQALPEFDGK | 26 | 1026,17 | 3075,48 |
| 7717  | IPI00178083 | 34,2 | 34,2 | IQLVEEELDR                 | 10 | 622,33  | 1242,65 |
| 3226  | IPI00178083 | 68,1 | 68,1 | EQAEAEVASLNR               | 12 | 658,82  | 1315,64 |
| 4147  | IPI00178083 | 88,6 | 88,6 | IQVLQQQADDAEER             | 14 | 821,90  | 1641,79 |
| 9613  | IPI00010779 | 42,3 | 42,3 | LVILEGELER                 | 10 | 585,84  | 1169,67 |
| 3359  | IPI00010779 | 75,7 | 75,7 | IQALQQQADEAEDR             | 14 | 807,89  | 1613,76 |
| 19068 | IPI00010779 | 59,8 | 59,8 | EENVGLHQTLDQTLNELNCI       | 20 | 1170,56 | 2339,11 |
| 6179  | IPI00465084 | 43,8 | 43,8 | KLEVNEAELLR                | 11 | 438,58  | 1312,73 |
| 14150 | IPI00465084 | 83,7 | 83,7 | VESLQEEIAFLK               | 12 | 703,38  | 1404,75 |
| 7564  | IPI00020101 | 31,7 | 31,7 | LLLPGELAK                  | 9  | 477,30  | 952,59  |
| 4900  | IPI00020101 | 32   | 32   | ESYSVYVYK                  | 9  | 569,28  | 1136,54 |
| 3104  | IPI00020101 | 44,6 | 44,6 | KESYSVYVYK                 | 10 | 633,32  | 1264,63 |
| 18818 | IPI00020101 | 66,8 | 66,8 | A(M)GIMNSFVNDIFER          | 15 | 880,41  | 1758,80 |
| 14880 | IPI00020101 | 72,4 | 72,4 | A(M)GI(M)NSFVNDIFER        | 15 | 888,41  | 1774,80 |
| 8361  | IPI00026154 | 44,4 | 44,4 | SLEDQVE(M)LR               | 10 | 618,30  | 1234,59 |
| 2301  | IPI00026154 | 44,8 | 44,8 | ESLQQ(M)AEVTR              | 11 | 654,32  | 1306,62 |
| 5553  | IPI00026154 | 85,2 | 85,2 | AQQEQELAADAFK              | 13 | 724,85  | 1447,69 |
| 2581  | IPI00026154 | 63,9 | 63,9 | YEQGTGCWQGPNR              | 13 | 776,83  | 1551,65 |
| 9266  | IPI00479217 | 57,1 | 57,1 | GYFEYIEENK                 | 10 | 646,30  | 1290,58 |
| 9341  | IPI00479217 | 77,5 | 77,5 | NFIELDQTNVSAQAQR           | 15 | 824,43  | 1646,84 |
| 18693 | IPI00008527 | 37,8 | 37,8 | AAGVNVEPFWPGLFAK           | 16 | 851,95  | 1701,89 |
| 20708 | IPI00216318 | 59,9 | 59,9 | EKIEAELQDICNDVLELLDK       | 20 | 796,40  | 2386,19 |
| 2766  | IPI00303882 | 56,2 | 56,2 | SVVTGGVQSV(M)GSR           | 14 | 690,35  | 1378,69 |
| 9921  | IPI00303882 | 67,8 | 67,8 | LEENLPILQQPTEK             | 14 | 826,45  | 1650,88 |
| 11643 | IPI00303882 | 57,3 | 57,3 | IATSLDGFVDVASVQQQR         | 17 | 917,97  | 1833,92 |



|                   |      |                                      |    |         |         |
|-------------------|------|--------------------------------------|----|---------|---------|
| 5994 IPI00216457  | 31,2 | 31,2 AGLQFPVGR                       | 9  | 472,77  | 943,52  |
| 18828 IPI00216457 | 68,3 | 68,3 VTIAQGGVLPNIQAVLLPK             | 19 | 966,09  | 1930,16 |
| 21508 IPI00216457 | 36,6 | 36,6 VGAGAPVY(M)AAVLEYLTAEILELAGNAAR | 29 | 983,85  | 2948,53 |
| 16430 IPI00024919 | 91,5 | 91,5 DYGVLLLEGSGLALR                 | 14 | 731,90  | 1461,78 |
| 2921 IPI00217465  | 51,8 | 51,8 ALAAAGYDVEK                     | 11 | 554,29  | 1106,56 |
| 5558 IPI00217465  | 59   | 59 ASGPPVSELITK                      | 12 | 599,84  | 1197,66 |
| 15187 IPI00178352 | 42   | 42 SPFVVNVAPPLDLSK                   | 15 | 791,95  | 1581,88 |
| 13802 IPI00178352 | 49,5 | 49,5 APLQVAVLGPTGVAEPVEVR            | 20 | 1001,57 | 2001,13 |
| 5233 IPI00025252  | 56,1 | 56,1 YGVSGYPTLK                      | 10 | 542,79  | 1083,56 |
| 12815 IPI00025252 | 48,2 | 48,2 FLQDYFDGNLK                     | 11 | 680,33  | 1358,65 |
| 17863 IPI00025252 | 77,2 | 77,2 ELSDFISYLQR                     | 11 | 685,85  | 1369,69 |
| 18553 IPI00025252 | 35,5 | 35,5 TFSHELSDFGLESTAGEIPVVAIR        | 24 | 859,11  | 2574,29 |
| 6176 IPI00413108  | 41   | 41 YVDIAIPCNNK                       | 11 | 653,83  | 1305,64 |
| 4347 IPI00413108  | 42,5 | 42,5 DPEEIEKEEQAAAEK                 | 15 | 858,40  | 1714,79 |
| 12312 IPI00413108 | 67,3 | 67,3 AIVAIENPADVSVISSR               | 17 | 870,98  | 1739,94 |
| 17283 IPI00413108 | 68,7 | 68,7 ADHQPLTEASYVNLPTIALCNTDSPLR     | 27 | 999,50  | 2995,47 |
| 7898 IPI00290770  | 53,5 | 53,5 AVAQALEVIPR                     | 11 | 583,85  | 1165,68 |
| 10093 IPI00290770 | 54,9 | 54,9 IPGGHIEDSCVLR                   | 13 | 714,88  | 1427,74 |
| 15825 IPI00290770 | 97,2 | 97,2 IGDEYFTFITDCK                   | 13 | 804,87  | 1607,72 |
| 12234 IPI00023048 | 72,5 | 72,5 GVVQELQQAISK                    | 12 | 650,37  | 1298,72 |
| 6296 IPI00023048  | 43,4 | 43,4 LQIQCVVEDDK                     | 11 | 673,83  | 1345,65 |
| 5663 IPI00023048  | 55,2 | 55,2 IASLEVENQSLR                    | 12 | 679,87  | 1357,72 |
| 18363 IPI00023048 | 37,4 | 37,4 LQIQCVVEDDKVGTDLLEEEITK         | 23 | 892,12  | 2673,34 |
| 8316 IPI00220301  | 37,3 | 37,3 VVVFVGPDK                       | 9  | 504,28  | 1006,55 |
| 11864 IPI00220301 | 54,7 | 54,7 LPFPIIDDR                       | 9  | 543,30  | 1084,59 |
| 2891 IPI00220301  | 51,2 | 51,2 DINAYNCEEPTEK                   | 13 | 791,84  | 1581,66 |
| 15962 IPI00220301 | 60,8 | 60,8 PGGLLLGDVAPNFEANTTVGR           | 21 | 1049,55 | 2097,09 |
| 2579 IPI00000874  | 72,7 | 72,7 ADEGISFR                        | 8  | 447,72  | 893,42  |
| 9346 IPI00000874  | 55,5 | 55,5 GLFIIDDK                        | 8  | 460,76  | 919,50  |
| 4152 IPI00465430  | 38,1 | 38,1 PLVLLK                          | 6  | 341,75  | 681,48  |

|                   |      |                           |    |        |         |
|-------------------|------|---------------------------|----|--------|---------|
| 3576 IPI00465430  | 33,2 | 33,2 LEDLLR               | 6  | 379,72 | 757,43  |
| 8126 IPI00465430  | 64,7 | 64,7 LGSLVDEFK            | 9  | 504,27 | 1006,53 |
| 4852 IPI00465430  | 31,5 | 31,5 KQELLEALTK           | 10 | 391,57 | 1171,68 |
| 11896 IPI00465430 | 48,5 | 48,5 NIYVLQELDNPGAK       | 14 | 787,41 | 1572,81 |
| 9731 IPI00465430  | 53,3 | 53,3 TFNTSTGGLLLPSDTK     | 16 | 826,43 | 1650,85 |
| 4542 IPI00216691  | 29,9 | 29,9 TLVLL(M)GK           | 8  | 445,77 | 889,53  |
| 7876 IPI00216691  | 46,9 | 46,9 DSPSVWAAVPGK         | 12 | 607,32 | 1212,62 |
| 5223 IPI00216691  | 60,5 | 60,5 STGGAPTFNVTVTK       | 14 | 690,36 | 1378,71 |
| 16495 IPI00216691 | 70,4 | 70,4 TFVNITPAEVGVLVGK     | 16 | 822,47 | 1642,93 |
| 2594 IPI00186711  | 29,8 | 29,8 GGELVYTDSEAR         | 12 | 648,81 | 1295,60 |
| 5525 IPI00186711  | 54,1 | 54,1 AQAEAQQPTFDALR       | 14 | 773,39 | 1544,76 |
| 9278 IPI00186711  | 52,1 | 52,1 LQEAGILSAEELQR       | 14 | 778,92 | 1555,82 |
| 12860 IPI00186711 | 63,8 | 63,8 APVPASELLASGVLSR     | 16 | 783,95 | 1565,88 |
| 20348 IPI00186711 | 53   | 53 DGHNLISLLEVLSGDSLPR    | 19 | 679,03 | 2034,07 |
| 18643 IPI00186711 | 33,1 | 33,1 GFFDPNTHENLTYLQLLR   | 19 | 769,72 | 2306,13 |
| 18493 IPI00004358 | 86,5 | 86,5 IGEEFLTDLSQLK        | 13 | 746,90 | 1491,78 |
| 18420 IPI00004358 | 58,1 | 58,1 WLLLCNPGLADTIVEK     | 16 | 921,50 | 1840,98 |
| 20238 IPI00004358 | 80,8 | 80,8 LQDFNVGDYIEAVLDR     | 16 | 933,96 | 1865,91 |
| 4420 IPI00215719  | 62,9 | 62,9 TNSTFNQVVVK          | 11 | 625,84 | 1249,66 |
| 14290 IPI00215719 | 72,4 | 72,4 ILTFDQLALDSPK        | 13 | 730,90 | 1459,79 |
| 4897 IPI00216319  | 31,3 | 31,3 AVTELNEPLSNEDR       | 14 | 793,89 | 1585,76 |
| 2759 IPI00000875  | 45,9 | 45,9 TPEFLR               | 6  | 381,71 | 761,41  |
| 10376 IPI00000875 | 31,4 | 31,4 STFVLDEFK            | 9  | 543,28 | 1084,54 |
| 17910 IPI00000875 | 59,8 | 59,8 ILGLLDAYLK           | 10 | 559,84 | 1117,67 |
| 5057 IPI00000875  | 61,2 | 61,2 ALIAAQYSGAQVR        | 13 | 674,37 | 1346,73 |
| 5020 IPI00000875  | 32,7 | 32,7 LDPGSEETQTLVR        | 13 | 722,87 | 1443,72 |
| 19470 IPI00000875 | 42,5 | 42,5 YSNEDTLSVALPYFWEHFDK | 20 | 821,05 | 2460,12 |
| 5115 IPI00025849  | 56,6 | 56,6 VSGGLEVLAEK          | 11 | 551,31 | 1100,61 |
| 14730 IPI00025849 | 70,5 | 70,5 LLPQLTYLDGYDR        | 13 | 783,91 | 1565,81 |
| 16723 IPI00025849 | 56   | 56 SLDLFNCEVTNLNDYR       | 16 | 986,96 | 1971,90 |

|                   |      |                                         |    |         |         |
|-------------------|------|-----------------------------------------|----|---------|---------|
| 3004 IPI00015029  | 42,5 | 42,5 DVNVNFEK                           | 8  | 482,74  | 963,46  |
| 9718 IPI00015029  | 65,9 | 65,9 LTFSCCLGGSDNFK                     | 13 | 723,34  | 1444,67 |
| 5415 IPI00028091  | 64,1 | 64,1 LPACVVDCGTGYTK                     | 14 | 770,86  | 1539,70 |
| 17438 IPI00028091 | 62,9 | 62,9 GVDDLDFFIGDEAIEKPTYATK             | 22 | 815,40  | 2443,18 |
| 18760 IPI00028091 | 38,8 | 38,8 TLTGTVIDSGDGVTHVIPVAEGYVIGSCK      | 30 | 1020,20 | 3057,57 |
| 5780 IPI00216592  | 52,5 | 52,5 SDVEAIFSK                          | 9  | 498,26  | 994,50  |
| 9146 IPI00216592  | 58,7 | 58,7 VDSLLENLEK                         | 10 | 580,31  | 1158,61 |
| 11067 IPI00216592 | 59,5 | 59,5 GFAFVQYVNER                        | 11 | 665,33  | 1328,65 |
| 4447 IPI00554788  | 35,1 | 35,1 IVLQIDNAR                          | 9  | 521,31  | 1040,60 |
| 3884 IPI00554788  | 66,5 | 66,5 LEAEIATYR                          | 9  | 533,28  | 1064,55 |
| 4012 IPI00554788  | 46,8 | 46,8 AQIFANTVDNAR                       | 12 | 660,34  | 1318,66 |
| 3179 IPI00001639  | 44,2 | 44,2 DTAAWTVGR                          | 9  | 488,75  | 975,48  |
| 4177 IPI00001639  | 31,4 | 31,4 P(M)IHELLTEGR                      | 11 | 437,90  | 1310,66 |
| 19088 IPI00001639 | 64   | 64 AAVENLPTFLVELSR                      | 15 | 829,96  | 1657,90 |
| 14617 IPI00001639 | 52,9 | 52,9 ESCLEAYTGIVQGLK                    | 15 | 834,42  | 1666,82 |
| 21698 IPI00001639 | 48   | 48 (M)FQSTAGSGGVQEDAL(M)AVSTLVEVLGGEFLK | 32 | 1101,87 | 3302,59 |
| 6334 IPI00217966  | 50,5 | 50,5 SADTLWGIQK                         | 10 | 559,79  | 1117,58 |
| 13710 IPI00217966 | 63,1 | 63,1 DQLIYNLLK                          | 9  | 560,32  | 1118,63 |
| 6539 IPI00217966  | 42,9 | 42,9 QVVESAYEVIK                        | 11 | 632,84  | 1263,67 |
| 20390 IPI00217966 | 32,7 | 32,7 LLIVSNPVDILTYVAWK                  | 17 | 972,56  | 1943,11 |
| 2506 IPI00550363  | 71,4 | 71,4 NVIGLQ(M)GTNR                      | 11 | 609,82  | 1217,62 |
| 19773 IPI00550363 | 60,1 | 60,1 YGINTTDIFQTVDLWEGK                 | 18 | 1050,51 | 2099,01 |
| 20508 IPI00550363 | 30,3 | 30,3 DGTVLCCELINALYPEGQAPVK             | 21 | 1144,08 | 2286,15 |
| 6299 IPI00022774  | 35,1 | 35,1 GDDLSTAILK                         | 10 | 516,78  | 1031,55 |
| 6781 IPI00022774  | 39,4 | 39,4 WALSQSNPSALR                       | 12 | 665,35  | 1328,68 |
| 9421 IPI00022774  | 53,9 | 53,9 LGDVISIQPCPDVK                     | 14 | 770,90  | 1539,79 |
| 16588 IPI00022774 | 42,7 | 42,7 LDQLIYIPLPDEK                      | 13 | 778,93  | 1555,85 |
| 20083 IPI00022774 | 43,6 | 43,6 NAPAIIFIDELDAIAPK                  | 17 | 604,34  | 1809,99 |
| 4797 IPI00024933  | 62,4 | 62,4 IGPLGLSPK                          | 9  | 441,28  | 880,54  |
| 12982 IPI00024933 | 29,1 | 29,1 QAQIEVVPSASALIHK                   | 16 | 833,99  | 1665,97 |

|                   |      |                                     |    |         |         |
|-------------------|------|-------------------------------------|----|---------|---------|
| 6536 IPI00024933  | 77,2 | 77,2 EILGTAQSVGCNVDGR               | 16 | 838,41  | 1674,80 |
| 4590 IPI00465439  | 58,4 | 58,4 GILAADESTGSIK                  | 14 | 666,85  | 1331,69 |
| 5275 IPI00465439  | 49,5 | 49,5 PYQYPALTPEQK                   | 12 | 717,87  | 1433,72 |
| 15180 IPI00334587 | 45,6 | 45,6 GFGFILFK                       | 8  | 464,77  | 927,52  |
| 7735 IPI00334587  | 42,6 | 42,6 IFVGGLNPEATEEK                 | 14 | 752,39  | 1502,76 |
| 4707 IPI00302925  | 54,4 | 54,4 YNI(M)LVR                      | 7  | 462,75  | 923,49  |
| 9206 IPI00302925  | 63,2 | 63,2 FAEAFEAI PR                    | 10 | 575,80  | 1149,58 |
| 11388 IPI00302925 | 60,2 | 60,2 LFVTNDAATILR                   | 12 | 667,38  | 1332,74 |
| 11967 IPI00165393 | 55,9 | 55,9 DLSTVEALQNLK                   | 12 | 665,86  | 1329,71 |
| 18510 IPI00165393 | 34,8 | 34,8 KLELSDNIISGGLEVLAEK            | 19 | 676,71  | 2027,11 |
| 18448 IPI00220327 | 98,5 | 98,5 SLDLDSIIAEVK                   | 12 | 651,86  | 1301,71 |
| 5160 IPI00221178  | 49,9 | 49,9 VEEIVTLR                       | 9  | 544,30  | 1086,59 |
| 10516 IPI00221178 | 70,7 | 70,7 TPAVEGLTEAE EEEELR             | 16 | 886,93  | 1771,85 |
| 8711 IPI00293276  | 56,7 | 56,7 LLCGLLAER                      | 9  | 522,80  | 1043,58 |
| 6914 IPI00293276  | 52,8 | 52,8 P(M)FIVNTNVPR                  | 11 | 652,34  | 1302,67 |
| 15085 IPI00003377 | 76,4 | 76,4 NPPGF AFVEFEDPR                | 14 | 811,39  | 1620,76 |
| 5398 IPI00643041  | 41,5 | 41,5 NLQYYDISAK                     | 10 | 607,81  | 1213,60 |
| 7171 IPI00643041  | 40,3 | 40,3 FNVWDTAGQEK                    | 11 | 647,81  | 1293,60 |
| 8526 IPI00643041  | 70,1 | 70,1 VCENIPIVLCGNK                  | 13 | 758,39  | 1514,76 |
| 12870 IPI00008529 | 42,6 | 42,6 NIEDVIAQGIGK                   | 12 | 628,85  | 1255,68 |
| 8561 IPI00008529  | 37   | 37 LASVPAGGAVAVSAAPGSAAPAAGSAPAAAEK | 33 | 925,48  | 2773,42 |
| 13125 IPI00220834 | 45,5 | 45,5 TDTLEDLFPTTK                   | 12 | 690,85  | 1379,68 |
| 19245 IPI00220834 | 41,7 | 41,7 HL(M)LPDFDLLEDIESK             | 16 | 644,32  | 1929,94 |
| 20615 IPI00220834 | 66,4 | 66,4 ASFEEASNQLINHIEQFLDTNETPYF(M)K | 28 | 1111,52 | 3331,53 |
| 5170 IPI00012011  | 37,2 | 37,2 AVLFCLSEDKK                    | 11 | 655,34  | 1308,67 |
| 6159 IPI00012011  | 70,8 | 70,8 YALYDATYETK                    | 11 | 669,32  | 1336,62 |
| 18950 IPI00012011 | 39,2 | 39,2 KEDLVFIFWAPESAPLK              | 17 | 995,54  | 1989,06 |
| 2559 IPI00020984  | 33,1 | 33,1 AEDEILNR                       | 9  | 544,76  | 1087,51 |
| 7104 IPI00020984  | 76,1 | 76,1 TPELNLDQFHDK                   | 12 | 728,86  | 1455,70 |
| 19385 IPI00020984 | 38,9 | 38,9 IPNPdffedLEPFR                 | 14 | 868,42  | 1734,83 |

|                   |      |                                         |    |         |         |
|-------------------|------|-----------------------------------------|----|---------|---------|
| 13002 IPI00020984 | 42,4 | 42,4 APVPTGEVYFADSFDR                   | 16 | 885,92  | 1769,83 |
| 3049 IPI00171611  | 41,3 | 41,3 STELLIR                            | 7  | 416,25  | 830,48  |
| 3664 IPI00171611  | 34,7 | 34,7 KSDVEAIFSK                         | 10 | 562,30  | 1122,59 |
| 20613 IPI00171611 | 75,2 | 75,2 FQSSAV(M)ALQEASEAYLVGLFEDTNLCAIHAK | 32 | 883,18  | 3528,69 |
| 4145 IPI00013894  | 31,1 | 31,1 ELIEQLR                            | 7  | 450,76  | 899,51  |
| 11378 IPI00013894 | 50,3 | 50,3 LAYINPDLALEEK                      | 13 | 744,90  | 1487,79 |
| 13482 IPI00013894 | 41,2 | 41,2 DCEECIQLEPTFIK                     | 14 | 891,41  | 1780,80 |
| 18688 IPI00013894 | 67,9 | 67,9 ALSVGNIDDALQCYSEAIK                | 19 | 1034,01 | 2066,00 |
| 10648 IPI00746388 | 76,8 | 76,8 APDFVIFYAPR                        | 10 | 591,80  | 1181,59 |
| 20643 IPI00746388 | 53,7 | 53,7 FYPEDVAEELIQDITQK                  | 17 | 680,00  | 2036,99 |
| 15677 IPI00005158 | 53,3 | 53,3 TENPLILIDEVDK                      | 13 | 749,90  | 1497,79 |
| 18473 IPI00005158 | 50,6 | 50,6 IVSGEAESEVEVTPENLQDFVGKPVFTVER     | 29 | 1059,21 | 3174,60 |
| 20580 IPI00219038 | 58,1 | 58,1 FQSAAIGALQEASEAYLVGLFEDTNLCAIHAK   | 32 | 1146,57 | 3436,69 |
| 6114 IPI00604590  | 60,6 | 60,6 GLVGEIHK                           | 8  | 414,76  | 827,51  |
| 8811 IPI00604590  | 39,2 | 39,2 DRPFFAGLVK                         | 10 | 383,88  | 1148,63 |
| 3566 IPI00604590  | 35,8 | 35,8 V(M)LGETNPADSKPGTIR                | 17 | 601,31  | 1800,90 |
| 4775 IPI00219219  | 36,4 | 36,4 LPDGYEFK                           | 8  | 484,74  | 967,46  |
| 5820 IPI00219219  | 53,5 | 53,5 DSNLCLHFNPR                        | 12 | 743,85  | 1485,68 |
| 9071 IPI00002966  | 45,1 | 45,1 VLATAFDTTLGGR                      | 13 | 661,36  | 1320,70 |
| 8676 IPI00002966  | 32,4 | 32,4 FLE(M)CNDLLAR                      | 11 | 699,33  | 1396,65 |
| 19438 IPI00002966 | 35,8 | 35,8 EFSITDVVPYISLR                     | 15 | 868,47  | 1734,92 |
| 18810 IPI00002966 | 31   | 31 SNLAYDIVQLPTGLTGIK                   | 18 | 952,03  | 1902,04 |
| 19160 IPI00002966 | 49,1 | 49,1 TSTVDLPIENQLLWQIDR                 | 18 | 1071,07 | 2140,12 |
| 4667 IPI00023860  | 29,9 | 29,9 FYEEVHDLER                         | 10 | 668,81  | 1335,61 |
| 12399 IPI00023860 | 41,9 | 41,9 YAVLYQPLFDK                        | 11 | 678,86  | 1355,71 |
| 15925 IPI00023860 | 62,6 | 62,6 LDGLVETPTGYIESLPR                  | 17 | 930,49  | 1858,97 |
| 19268 IPI00008433 | 78,3 | 78,3 TIAECLADELINA AK                   | 15 | 816,42  | 1630,82 |
| 3131 IPI00009342  | 40,8 | 40,8 LTELGTVDPK                         | 10 | 536,80  | 1071,58 |
| 10046 IPI00009342 | 41,8 | 41,8 FFQTACDVPELQDK                     | 14 | 849,40  | 1696,78 |
| 11944 IPI00009342 | 45,7 | 45,7 VDQIQEIVTGNPTVIK                   | 16 | 877,49  | 1752,97 |

|       |             |      |      |                                    |    |         |         |
|-------|-------------|------|------|------------------------------------|----|---------|---------|
| 19040 | IPI00009342 | 48,2 | 48,2 | ILAIGLINEALDEGDAQK                 | 18 | 942,01  | 1882,00 |
| 21053 | IPI00009342 | 30,9 | 30,9 | IGGILANELSVDEAALHAAVIAINEAIDR      | 29 | 986,87  | 2957,58 |
| 14682 | IPI00556589 | 61,1 | 61,1 | EGDVLTLLESER                       | 12 | 680,85  | 1359,69 |
| 18138 | IPI00293434 | 74,6 | 74,6 | VLESEQFLTELTR                      | 14 | 839,46  | 1676,90 |
| 14000 | IPI00221092 | 29,1 | 29,1 | LLEPVLLL GK                        | 10 | 547,86  | 1093,71 |
| 8286  | IPI00221092 | 73,3 | 73,3 | GPLQSVQVFGR                        | 11 | 594,33  | 1186,65 |
| 3499  | IPI00013415 | 32,1 | 32,1 | VETFSGVYK                          | 9  | 515,27  | 1028,52 |
| 17878 | IPI00013415 | 38,3 | 38,3 | AHIFVPVPQLK                        | 12 | 669,43  | 1336,85 |
| 19480 | IPI00013415 | 82,8 | 82,8 | TLTAVHDAILEDLVFPSEIVGK             | 22 | 1184,14 | 2366,27 |
| 16598 | IPI00031461 | 35,5 | 35,5 | FVSISDLLVPK                        | 11 | 609,36  | 1216,71 |
| 14795 | IPI00031461 | 79,9 | 79,9 | NPYYGGESASITPLEDLYK                | 19 | 1059,01 | 2116,00 |
| 20173 | IPI00031461 | 42,9 | 42,9 | FDLGQDVIDFTGHALALYR                | 19 | 717,70  | 2150,08 |
| 10755 | IPI00219217 | 29,3 | 29,3 | FIIPQIVK                           | 8  | 479,31  | 956,61  |
| 6849  | IPI00219217 | 61,5 | 61,5 | LIAPVAEEEEATVPNNK                  | 16 | 847,95  | 1693,89 |
| 5388  | IPI00009904 | 55,9 | 55,9 | LPLQDVYK                           | 8  | 488,28  | 974,54  |
| 2771  | IPI00009904 | 54,8 | 54,8 | VSQGQLVV(M)QPEK                    | 13 | 729,88  | 1457,75 |
| 14177 | IPI00009904 | 48   | 48   | VEGFPTIYFAPSGDK                    | 15 | 814,40  | 1626,79 |
| 8753  | IPI00009904 | 37,2 | 37,2 | FA(M)EPEEFDSDTLR                   | 14 | 851,87  | 1701,72 |
| 17783 | IPI00009904 | 36,2 | 36,2 | EVSQPDWTPPEVTLVLT K                | 19 | 1068,56 | 2135,11 |
| 20320 | IPI00465070 | 71,1 | 71,1 | FQSSAV(M)ALQEACEAYLVGLFEDTNLCAIHAK | 32 | 1201,57 | 3601,69 |
| 6254  | IPI00376798 | 32,3 | 32,3 | YDGIILPGK                          | 9  | 488,28  | 974,54  |
| 10672 | IPI00376798 | 64,9 | 64,9 | VLEQLTGQTPVFSK                     | 14 | 773,93  | 1545,84 |
| 6324  | IPI00215780 | 53,5 | 53,5 | VLQALEGLK                          | 9  | 485,80  | 969,58  |
| 6111  | IPI00215780 | 39,9 | 39,9 | VPEWVDTVK                          | 9  | 536,79  | 1071,56 |
| 4295  | IPI00012066 | 89   | 89   | PSSSPVIFAGGQDR                     | 14 | 709,36  | 1416,70 |
| 17743 | IPI00012066 | 31,4 | 31,4 | AITIAGIPQSIIECVK                   | 16 | 856,99  | 1711,96 |
| 2494  | IPI00453476 | 46,2 | 46,2 | HGESAWNLENR                        | 11 | 656,80  | 1311,59 |
| 18283 | IPI00453476 | 34,7 | 34,7 | ALPFWNEEIVPQIK                     | 14 | 842,46  | 1682,90 |
| 9913  | IPI00453476 | 37,1 | 37,1 | YADLTEDQLPSCESLK                   | 16 | 934,93  | 1867,85 |
| 9308  | IPI00453476 | 38,4 | 38,4 | FSGWYDADLSPAGHEEAK                 | 18 | 990,44  | 1978,87 |

|       |             |      |      |                               |    |         |         |
|-------|-------------|------|------|-------------------------------|----|---------|---------|
| 16980 | IPI00025366 | 49,3 | 49,3 | DILADLIPK                     | 9  | 499,30  | 996,59  |
| 12614 | IPI00025366 | 31   | 31   | GLVYETSVLDPDEGIR              | 16 | 881,95  | 1761,88 |
| 11600 | IPI00024915 | 53,8 | 53,8 | VNLAELFK                      | 8  | 467,27  | 932,53  |
| 13717 | IPI00024915 | 40,8 | 40,8 | GVLFGVPGAFTPGCSK              | 16 | 797,41  | 1592,80 |
| 13085 | IPI00024915 | 56,8 | 56,8 | VGDAIPAVEVFEGEPGNK            | 18 | 914,46  | 1826,91 |
| 18293 | IPI00011200 | 43,3 | 43,3 | DLPLLLFR                      | 8  | 493,80  | 985,60  |
| 5495  | IPI00011200 | 80,5 | 80,5 | AGTGVDNVDLEAATR               | 15 | 744,87  | 1487,72 |
| 6884  | IPI00215884 | 40,3 | 40,3 | DGTGVVEFVR                    | 10 | 539,78  | 1077,54 |
| 5563  | IPI00215884 | 31,5 | 31,5 | EAGDVCYADVYR                  | 12 | 709,31  | 1416,60 |
| 15660 | IPI00215884 | 38,2 | 38,2 | GGPPFAFVEFEDPR                | 14 | 782,87  | 1563,74 |
| 19165 | IPI00022744 | 53   | 53   | LLQTDDEEEAGLLELLK             | 17 | 965,01  | 1928,00 |
| 20608 | IPI00022744 | 58,4 | 58,4 | FLESVEGNQNYPLLLTLLEK          | 21 | 1217,16 | 2432,31 |
| 8493  | IPI00017334 | 50,5 | 50,5 | FDAGELITQR                    | 10 | 575,30  | 1148,58 |
| 19083 | IPI00017334 | 42,1 | 42,1 | NITYLPAGQSVLLQLPQ             | 17 | 928,02  | 1854,03 |
| 6414  | IPI00024145 | 33,7 | 33,7 | YQLDPTASISAK                  | 12 | 647,34  | 1292,66 |
| 8916  | IPI00024145 | 48,9 | 48,9 | LTFDITTFSPNTGK                | 13 | 714,85  | 1427,69 |
| 2256  | IPI00024145 | 46   | 46   | SCSGVEFSTSGSSNTDTGK           | 19 | 954,40  | 1906,78 |
| 2376  | IPI00033494 | 47,4 | 47,4 | EAFN(M)IDQNR                  | 10 | 627,28  | 1252,55 |
| 9598  | IPI00033494 | 52,6 | 52,6 | GNFNYIEFTR                    | 10 | 630,80  | 1259,59 |
| 8808  | IPI00033494 | 31,2 | 31,2 | FTDEEVDELYR                   | 11 | 708,32  | 1414,63 |
| 15042 | IPI00033494 | 51,2 | 51,2 | ATSNVFA(M)FDQSQIQEFK          | 18 | 1053,99 | 2105,98 |
| 20538 | IPI00012503 | 60,9 | 60,9 | EIVDSYLPVILDIK                | 15 | 865,50  | 1728,99 |
| 3714  | IPI00031812 | 59,7 | 59,7 | RPQYSNPPVQGEV(M)EGADNQGAGEQGR | 27 | 963,10  | 2886,29 |
| 4325  | IPI00241841 | 63,6 | 63,6 | YEELQSLAGK                    | 10 | 569,29  | 1136,57 |
| 18465 | IPI00241841 | 72,8 | 72,8 | NLDLDSIIAEVK                  | 12 | 665,37  | 1328,72 |
| 17378 | IPI00221232 | 44,8 | 44,8 | SDPLLIGIPTSSENPFK             | 16 | 864,46  | 1726,91 |
| 18813 | IPI00646240 | 72,1 | 72,1 | GIMNSFVNDIFER                 | 13 | 771,37  | 1540,73 |
| 14642 | IPI00646240 | 31,4 | 31,4 | GI(M)NSFVNDIFER               | 13 | 779,37  | 1556,73 |
| 14815 | IPI00646240 | 40,6 | 40,6 | (M)GI(M)NSFVNDIFER            | 14 | 852,89  | 1703,77 |
| 6654  | IPI00398135 | 51,1 | 51,1 | TGAAPIIDVVR                   | 11 | 556,33  | 1110,64 |

|                   |      |                                  |    |         |         |
|-------------------|------|----------------------------------|----|---------|---------|
| 5828 IPI00398135  | 43,7 | 43,7 NQSF CPTVNLDK               | 12 | 711,84  | 1421,66 |
| 6124 IPI00010740  | 38,1 | 38,1 YGEPGEVFINK                 | 11 | 626,81  | 1251,61 |
| 17038 IPI00010740 | 46   | 46 LFGVGNLPADITEDEFK             | 16 | 904,46  | 1806,91 |
| 18545 IPI00641706 | 31,8 | 31,8 FWEVISDEHGIDPAGGYVGDSALQLER | 27 | 987,47  | 2959,40 |
| 7803 IPI00011253  | 46,7 | 46,7 GLCAIAQAESLR                | 12 | 644,84  | 1287,66 |
| 5445 IPI00011253  | 41,4 | 41,4 ELAEDGYSGVEVR               | 13 | 712,34  | 1422,66 |
| 8076 IPI00011253  | 29,4 | 29,4 DEILPTTPISEQK               | 13 | 735,89  | 1469,76 |
| 3089 IPI00011253  | 52,1 | 52,1 GGKPEPPA(M)PQPVPPTA         | 16 | 795,40  | 1588,79 |
| 14890 IPI00011253 | 35,8 | 35,8 FVDGL(M)IHSGDPVNYVDTAVR     | 22 | 828,73  | 2483,18 |
| 16412 IPI00010154 | 32,9 | 32,9 EVEPALELLEPIDQK             | 15 | 861,96  | 1721,91 |
| 14405 IPI00010154 | 77,3 | 77,3 NPYYGGESSITPLEELYK          | 19 | 1074,01 | 2146,01 |
| 14882 IPI00027107 | 37,7 | 37,7 LLDAVDTYIPVPAR              | 14 | 771,93  | 1541,85 |
| 17860 IPI00027107 | 49,8 | 49,8 GEETPVIVGSALCALEGR          | 18 | 929,47  | 1856,93 |
| 3041 IPI00015262  | 36,2 | 36,2 AGQCVIGLQ(M)GTNK            | 14 | 746,87  | 1491,72 |
| 19153 IPI00015262 | 78   | 78 TWIEGLTGLSIGPDFQK             | 17 | 931,49  | 1860,96 |
| 4235 IPI00302927  | 38,4 | 38,4 TGCNVLLIQK                  | 10 | 573,32  | 1144,63 |
| 19318 IPI00302927 | 79   | 79 DALSDLALHFLNK                 | 13 | 728,89  | 1455,77 |
| 3459 IPI00219678  | 31,9 | 31,9 GVFNVQ(M)EPK                | 10 | 582,79  | 1163,56 |
| 2666 IPI00219678  | 87,8 | 87,8 VVTDTDETELAR                | 12 | 674,83  | 1347,65 |
| 4377 IPI00386755  | 66   | 66 LGAVDESLSEETQK                | 14 | 753,37  | 1504,73 |
| 8733 IPI00386755  | 46,5 | 46,5 YSEEANNLIEECEQAER           | 17 | 1042,45 | 2082,88 |
| 19728 IPI00179964 | 86,4 | 86,4 LPIDVTEGEVISLGLPFGK         | 19 | 992,55  | 1983,08 |
| 8158 IPI00465361  | 31,3 | 31,3 GFSLEELR                    | 8  | 475,75  | 949,49  |
| 9408 IPI00465361  | 50,3 | 50,3 DAGQISGLNVLR                | 12 | 621,84  | 1241,67 |
| 5868 IPI00465361  | 52,3 | 52,3 LATQLTGVPV(M)PVR            | 13 | 699,89  | 1397,77 |
| 3469 IPI00218236  | 34,3 | 34,3 HDLDLICR                    | 8  | 521,26  | 1040,51 |
| 20010 IPI00218236 | 58,4 | 58,4 EIFLSQPILLELEAPLK           | 17 | 977,06  | 1952,11 |
| 21283 IPI00240909 | 86,5 | 86,5 IQDALSTVLQYAEDVLSGK         | 19 | 1025,54 | 2049,06 |
| 8002 IPI00072377  | 29   | 29 VEVTEFEDIK                    | 10 | 604,81  | 1207,60 |
| 4085 IPI00072377  | 32,2 | 32,2 LNEQASEEILK                 | 11 | 637,33  | 1272,65 |



|       |             |      |      |                            |    |         |         |
|-------|-------------|------|------|----------------------------|----|---------|---------|
| 17245 | IPI00072377 | 41,3 | 41,3 | IDFYFDENPYFENK             | 14 | 920,91  | 1839,80 |
| 9976  | IPI00072377 | 31,9 | 31,9 | EQQEAIHIDEVQNEIDR          | 18 | 732,35  | 2194,01 |
| 11849 | IPI00220709 | 33,9 | 33,9 | TIDDLEETLASAK              | 13 | 703,36  | 1404,70 |
| 8623  | IPI00100160 | 47,6 | 47,6 | ALTLIAGSPLK                | 11 | 542,34  | 1082,67 |
| 20013 | IPI00100160 | 56,2 | 56,2 | ISGSILNELIGLVR             | 14 | 742,44  | 1482,87 |
| 19593 | IPI00100160 | 40,2 | 40,2 | KLEGDSTDLSAQIAELQAQIAELK   | 24 | 872,45  | 2614,32 |
| 17225 | IPI00643920 | 42,7 | 42,7 | LDNLVAILDINR               | 12 | 684,89  | 1367,77 |
| 12232 | IPI00643920 | 52,7 | 52,7 | ILATPPQEDAPSVDIANIR        | 19 | 1010,54 | 2019,07 |
| 5710  | IPI00032826 | 42,4 | 42,4 | AIEINPDSAQPYK              | 13 | 723,37  | 1444,72 |
| 7725  | IPI00032826 | 41,7 | 41,7 | VAAIEALNDGELQK             | 14 | 735,89  | 1469,77 |
| 5875  | IPI00029744 | 85,2 | 85,2 | SGDSEVYQLGDVSQK            | 15 | 806,38  | 1610,74 |
| 4257  | IPI00219757 | 62,2 | 62,2 | ASCLYGQLPK                 | 10 | 568,79  | 1135,57 |
| 11580 | IPI00219757 | 41,6 | 41,6 | PPYTVVYFPVR                | 11 | 669,37  | 1336,72 |
| 6966  | IPI00291005 | 60   | 60   | VIVVGNPANTNCLTASK          | 17 | 879,46  | 1756,91 |
| 5873  | IPI00215918 | 39,4 | 39,4 | IL(M)VGLDAAGK              | 11 | 552,31  | 1102,61 |
| 3029  | IPI00215918 | 42,2 | 42,2 | IQEVADDELQK                | 10 | 586,81  | 1171,61 |
| 19158 | IPI00215918 | 44,5 | 44,5 | LGEIVTTIPTIGFNVETVEYK      | 21 | 1162,13 | 2322,24 |
| 10675 | IPI00008530 | 30,6 | 30,6 | IIQLDDYPK                  | 10 | 609,34  | 1216,67 |
| 15105 | IPI00008530 | 48,9 | 48,9 | TSFFQALGITTK               | 12 | 657,36  | 1312,70 |
| 8976  | IPI00008530 | 38,5 | 38,5 | AGAIAPCEVTVPAQNTGLGPEK     | 22 | 1090,55 | 2179,09 |
| 16072 | IPI00298547 | 55,6 | 55,6 | EGPYDVVVLPGGNLGAQNLSESAAVK | 26 | 1292,67 | 2583,33 |
| 12374 | IPI00646304 | 29,7 | 29,7 | VIFGLFGK                   | 8  | 440,77  | 879,52  |
| 5520  | IPI00646304 | 29   | 29   | IEVEKPFAlAK                | 11 | 622,86  | 1243,71 |
| 11082 | IPI00646304 | 73,7 | 73,7 | TVDNFVALATGEK              | 13 | 682,86  | 1363,70 |
| 13807 | IPI00015953 | 33,8 | 33,8 | GVTFLFPIQAK                | 11 | 610,86  | 1219,70 |
| 12512 | IPI00015953 | 64,2 | 64,2 | EGAFSNFPISEETIK            | 15 | 834,91  | 1667,81 |
| 9418  | IPI00216587 | 46,9 | 46,9 | NCIVLIDSTPYR               | 12 | 725,87  | 1449,73 |
| 8281  | IPI00216587 | 41,1 | 41,1 | ISSLLEEQFQQGK              | 13 | 753,89  | 1505,77 |
| 15005 | IPI00178440 | 49,3 | 49,3 | SPAGLQVLNDYLADK            | 15 | 802,42  | 1602,83 |
| 9161  | IPI00010796 | 78,1 | 78,1 | VDATEESDLAQQYGVR           | 16 | 890,92  | 1779,83 |

|                   |      |                                    |    |         |         |
|-------------------|------|------------------------------------|----|---------|---------|
| 6194 IPI00014177  | 40,5 | 40,5 VNIVPVI AK                    | 9  | 476,81  | 951,61  |
| 16327 IPI00014177 | 38   | 38 TIISYIDEQFER                    | 12 | 757,38  | 1512,75 |
| 8803 IPI00014177  | 45,2 | 45,2 LTVVDTPGYGDAINCR              | 16 | 875,92  | 1749,84 |
| 4515 IPI00221222  | 38,5 | 38,5 VLIDIR                        | 6  | 364,74  | 727,46  |
| 3026 IPI00221222  | 52,7 | 52,7 DDN(M)FQIGK                   | 9  | 542,24  | 1082,47 |
| 13327 IPI00221222 | 40,4 | 40,4 GISLNPEQWSQLK                 | 13 | 750,40  | 1498,78 |
| 4432 IPI00012074  | 35,1 | 35,1 TGYTLDVTTGQR                  | 12 | 656,33  | 1310,64 |
| 15510 IPI00012074 | 51,8 | 51,8 NLATTVTEEILEK                 | 13 | 730,90  | 1459,78 |
| 20333 IPI00021290 | 78,5 | 78,5 DLVSSLTSGLLTIGDR              | 16 | 823,95  | 1645,89 |
| 6959 IPI00012750  | 43,9 | 43,9 AALQELLSK                     | 9  | 486,79  | 971,56  |
| 8678 IPI00012750  | 55,5 | 55,5 LNNLVLFDK                     | 9  | 538,31  | 1074,61 |
| 3551 IPI00000105  | 32   | 32 ALQPLEEGEDEEK                   | 13 | 743,85  | 1485,68 |
| 15870 IPI00000105 | 45,2 | 45,2 LAQDPFPLYPGEVLEK              | 16 | 908,48  | 1814,95 |
| 18393 IPI00000105 | 30,7 | 30,7 VVAGDEWLFEGPGTYIPR            | 18 | 1003,50 | 2004,99 |
| 20798 IPI00000105 | 32,7 | 32,7 SFFLQPGEQLEQGIQDVYVLSEQQGLLLR | 29 | 1112,25 | 3333,72 |
| 12247 IPI00418262 | 76,8 | 76,8 GVVPLAGTDGETTTQGLDGLSER       | 23 | 1137,07 | 2272,12 |
| 13722 IPI00171903 | 53   | 53 AFITNIPFDVK                     | 11 | 632,85  | 1263,68 |
| 3970 IPI00296337  | 38,8 | 38,8 SLGPPQGEEDSVPR                | 14 | 734,36  | 1466,70 |
| 9518 IPI00296337  | 35   | 35 NLSSNEAISLEEIR                  | 14 | 787,90  | 1573,79 |
| 15667 IPI00296337 | 47   | 47 TVGALQVLGTEAQSSLLK              | 18 | 908,02  | 1814,02 |
| 4957 IPI00329745  | 31,9 | 31,9 VIEEQLEPAVEK                  | 12 | 692,37  | 1382,73 |
| 13970 IPI00329745 | 91,8 | 91,8 AAVPSGASTGIYEALRLR            | 18 | 902,98  | 1803,94 |
| 16465 IPI00329745 | 66,1 | 66,1 TVQLTSSELESTLETLLK            | 17 | 940,00  | 1877,98 |
| 12492 IPI00010402 | 75,8 | 75,8 IQYQLVDISQDNALR               | 15 | 888,47  | 1774,92 |
| 2264 IPI00001960  | 35,1 | 35,1 HPESNTAG(M)DIFAK              | 14 | 767,35  | 1532,69 |
| 17888 IPI00001960 | 44,2 | 44,2 IEEFLEEVLCPPK                 | 13 | 801,91  | 1601,80 |
| 14267 IPI00001960 | 45,4 | 45,4 FLDGNE(M)TLADCNLLPK           | 17 | 983,97  | 1965,92 |
| 2754 IPI00299000  | 40,6 | 40,6 SDQDYILK                      | 8  | 491,25  | 980,48  |
| 8721 IPI00299000  | 42,5 | 42,5 ITSGBPFEPPDLYK                | 12 | 683,85  | 1365,68 |
| 9138 IPI00027626  | 51,4 | 51,4 ALQFLEEVK                     | 9  | 538,80  | 1075,59 |

|       |             |      |      |                          |    |         |         |
|-------|-------------|------|------|--------------------------|----|---------|---------|
| 20928 | IPI00027626 | 44,1 | 44,1 | VHAELADVLTEAVVDSILAIK    | 21 | 736,08  | 2205,22 |
| 13175 | IPI00015891 | 73,5 | 73,5 | NLQEEIDALESR             | 12 | 708,85  | 1415,69 |
| 4422  | IPI00018206 | 40,7 | 40,7 | IGASFLQR                 | 8  | 446,26  | 890,50  |
| 9291  | IPI00018206 | 56,8 | 56,8 | IAAAILNTPDLR             | 12 | 634,37  | 1266,73 |
| 3965  | IPI00020194 | 54,2 | 54,2 | GEATVSFDDPPSAK           | 14 | 710,83  | 1419,65 |
| 3649  | IPI00015842 | 38,1 | 38,1 | TFDQLTPDESK              | 11 | 640,80  | 1279,59 |
| 18708 | IPI00015842 | 56,1 | 56,1 | EIVVLETLEDIDK            | 13 | 758,41  | 1514,81 |
| 6094  | IPI00021812 | 54,1 | 54,1 | GEGPDVDVNLPK             | 12 | 620,31  | 1238,61 |
| 6294  | IPI00021812 | 43,7 | 43,7 | AEGPEVDVNLPK             | 12 | 634,33  | 1266,64 |
| 4127  | IPI00027442 | 30,4 | 30,4 | AVYTQDCPLAAAK            | 13 | 704,35  | 1406,68 |
| 8853  | IPI00027442 | 36,7 | 36,7 | AVFDETYDPDVR             | 12 | 704,84  | 1407,67 |
| 15132 | IPI00027442 | 53,6 | 53,6 | DIINEEEVQFLK             | 12 | 738,88  | 1475,75 |
| 20255 | IPI00027442 | 32,3 | 32,3 | NVGCLQEALQLATSFAQLR      | 19 | 707,04  | 2118,09 |
| 9588  | IPI00465315 | 32,7 | 32,7 | ADLIAYLK                 | 8  | 453,77  | 905,52  |
| 19225 | IPI00465315 | 56,7 | 56,7 | GIIWGEDTL(M)EYLENPK      | 17 | 1012,49 | 2022,96 |
| 19915 | IPI00028635 | 68,6 | 68,6 | SIVVEIEDLVAR             | 12 | 686,87  | 1371,72 |
| 8568  | IPI00006865 | 68,3 | 68,3 | NLGSINTELQDVQR           | 14 | 793,91  | 1585,81 |
| 8438  | IPI00221091 | 42   | 42   | HGYIGEFEIIDDHR           | 14 | 567,60  | 1699,79 |
| 16770 | IPI00289499 | 60,2 | 60,2 | (M)SSFGDFVALSDVCDVPTAK   | 20 | 1081,49 | 2160,97 |
| 5513  | IPI00221088 | 35,6 | 35,6 | IEDFLER                  | 7  | 461,24  | 920,46  |
| 9986  | IPI00221088 | 53,5 | 53,5 | LDYILGLK                 | 8  | 467,78  | 933,55  |
| 16340 | IPI00439944 | 66,7 | 66,7 | NSNILEDLETLR             | 12 | 708,87  | 1415,72 |
| 11696 | IPI00030154 | 42,1 | 42,1 | APLDIPVPDPVK             | 12 | 630,86  | 1259,71 |
| 19605 | IPI00015148 | 66,3 | 66,3 | INVNEIFYDLVR             | 12 | 747,90  | 1493,78 |
| 11194 | IPI00217975 | 39,9 | 39,9 | IQELEDLLAK               | 10 | 586,33  | 1170,65 |
| 20668 | IPI00217975 | 54,3 | 54,3 | SLEGDLEDLKDQIAQLEASLAAAK | 24 | 843,44  | 2527,30 |
| 7159  | IPI00479997 | 46,9 | 46,9 | DLSLEEIQK                | 9  | 537,79  | 1073,56 |
| 10146 | IPI00479997 | 33,5 | 33,5 | ESVPEFPLSPPK             | 12 | 663,85  | 1325,69 |
| 10031 | IPI00479997 | 51,7 | 51,7 | TVTA(M)DVVYALK           | 12 | 663,85  | 1325,69 |
| 3985  | IPI00017448 | 34,2 | 34,2 | TYAICGAIR                | 9  | 512,77  | 1023,52 |

|                   |      |                                |    |         |         |
|-------------------|------|--------------------------------|----|---------|---------|
| 2564 IPI00017448  | 48,7 | 48,7 DHASIQ(M)NVAEVDK          | 14 | 786,87  | 1571,72 |
| 8416 IPI00015077  | 65,8 | 65,8 TLTTVQGIADDYDK            | 14 | 770,38  | 1538,75 |
| 15375 IPI00026570 | 59,8 | 59,8 LfqEDDEIPLYLK             | 13 | 811,92  | 1621,83 |
| 20855 IPI00742905 | 64,7 | 64,7 ETPFELIEALLK              | 12 | 701,89  | 1401,77 |
| 11798 IPI00449049 | 64,3 | 64,3 VVSEDFLQDVSASTK           | 15 | 812,91  | 1623,80 |
| 19373 IPI00026781 | 51,4 | 51,4 LPEDPLLSGLLDSPALK         | 17 | 889,50  | 1776,99 |
| 17318 IPI00026781 | 43,7 | 43,7 LFDHPESPTPNPTEPLFLAQAEVYK | 25 | 947,47  | 2839,40 |
| 2981 IPI00024920  | 64,2 | 64,2 AQAELVGTADATR             | 14 | 716,36  | 1430,70 |
| 3031 IPI00025019  | 39   | 39 DVYTG DALR                  | 9  | 505,25  | 1008,49 |
| 9546 IPI00025019  | 53,7 | 53,7 GAVYSFDPVGSYQR            | 14 | 773,37  | 1544,72 |
| 4537 IPI00100197  | 63,3 | 63,3 LGAAPEEESAYVAGEK          | 16 | 810,89  | 1619,77 |
| 7308 IPI00017617  | 37,9 | 37,9 APILIATDVASR              | 12 | 613,86  | 1225,70 |
| 11498 IPI00017617 | 30,1 | 30,1 GDGPICLV LAPTR            | 13 | 684,87  | 1367,72 |
| 11994 IPI00017617 | 35,9 | 35,9 ELAQVQVQVAAEYCR           | 15 | 896,94  | 1791,86 |
| 10026 IPI00009790 | 37,8 | 37,8 NVIFQPVAELK               | 11 | 629,36  | 1256,71 |
| 18395 IPI00009790 | 44,9 | 44,9 GITNLCVIGGDGSLTGANLFR     | 21 | 1068,05 | 2134,08 |
| 3376 IPI00216308  | 36,2 | 36,2 VTQSNFAVGYK               | 11 | 607,31  | 1212,61 |
| 7770 IPI00216308  | 39,7 | 39,7 LTFDSSFSPNTGK             | 13 | 700,84  | 1399,66 |
| 17300 IPI00012079 | 62,7 | 62,7 TISLTDFLAEDGGTGGGSTYVSK   | 23 | 1138,55 | 2275,09 |
| 9846 IPI00000873  | 62,5 | 62,5 SSAQDPQAVLGALGR           | 15 | 735,39  | 1468,76 |
| 20008 IPI00024993 | 45,6 | 45,6 ICPVETLVEEAIQCAEK         | 17 | 663,66  | 1987,96 |
| 15142 IPI00024993 | 39,8 | 39,8 AQFAQPEILIGTIPGAGGTQR     | 21 | 1063,07 | 2124,13 |
| 9506 IPI00022793  | 46,7 | 46,7 DQLLLGPTYATPK             | 13 | 708,89  | 1415,77 |
| 15545 IPI00022793 | 39,7 | 39,7 AQDEGLLSDVVPFK            | 14 | 759,40  | 1516,78 |
| 5976 IPI00026202  | 62,2 | 62,2 DLTTAGAVTQCYR             | 13 | 728,35  | 1454,68 |
| 17178 IPI00219005 | 51   | 51 FEIGEGENLDLPYGLER           | 17 | 975,98  | 1949,94 |
| 14352 IPI00032140 | 59,3 | 59,3 LYGSSVSFADDFVR            | 15 | 830,41  | 1658,80 |
| 8010 IPI00297982  | 61,2 | 61,2 IVLTNPVCTEVGEK            | 14 | 779,91  | 1557,81 |
| 7354 IPI00219153  | 37,4 | 37,4 ITVTSEVPFSK               | 11 | 604,33  | 1206,65 |
| 4802 IPI00219153  | 34,5 | 34,5 AGNLGGGVVTIER             | 13 | 621,84  | 1241,67 |

|       |             |      |      |                                     |    |         |         |
|-------|-------------|------|------|-------------------------------------|----|---------|---------|
| 19640 | IPI00219153 | 39,7 | 39,7 | FTLDCTHPVEDGI(M)DAANFEQFLQER        | 26 | 1033,79 | 3098,36 |
| 9306  | IPI00014238 | 57,6 | 57,6 | LPETNLFETEETR                       | 13 | 789,89  | 1577,76 |
| 13340 | IPI00014238 | 33,9 | 33,9 | VTYHPDGPEGQAYDVDFTPPFR              | 22 | 836,72  | 2507,14 |
| 10893 | IPI00218733 | 39,7 | 39,7 | GDGPVQGIINFEQK                      | 14 | 751,39  | 1500,76 |
| 17335 | IPI00218733 | 46,4 | 46,4 | HVGDLGNVTADKDGADVSIEDSVISLSGDHCIIGR | 36 | 930,96  | 3719,81 |
| 18943 | IPI00645078 | 39   | 39   | SLVASLAEPDFVVTDFAK                  | 18 | 955,00  | 1907,99 |
| 18425 | IPI00645078 | 49   | 49   | AAVATFLQSVQVPEFTPK                  | 18 | 967,03  | 1932,04 |
| 6046  | IPI00005537 | 41,8 | 41,8 | LVESLPQEIK                          | 10 | 578,33  | 1154,65 |
| 21693 | IPI00005537 | 38,1 | 38,1 | IQQLVQDIASLTLLEISDLNELLK            | 24 | 903,85  | 2708,52 |
| 10847 | IPI00017672 | 49,2 | 49,2 | LGADAVG(M)STVPEVIVAR                | 18 | 900,98  | 1799,95 |
| 17080 | IPI00017672 | 38,4 | 38,4 | LTQAQIFDYGEIPNFPR                   | 17 | 1005,01 | 2008,01 |
| 5278  | IPI00018522 | 59,1 | 59,1 | GQLCELS CSTDYR                      | 13 | 794,84  | 1587,66 |
| 10471 | IPI00550746 | 49,2 | 49,2 | GQPAIDGELYNEVK                      | 15 | 823,43  | 1644,84 |
| 19885 | IPI00216106 | 58,5 | 58,5 | IPAFLNVVDIAGLVK                     | 15 | 784,97  | 1567,93 |
| 13062 | IPI00299155 | 45,8 | 45,8 | LLDEVFFSEK                          | 10 | 613,82  | 1225,62 |
| 8368  | IPI00006052 | 51,4 | 51,4 | IETLTQQLQAK                         | 12 | 693,40  | 1384,79 |
| 5072  | IPI00014938 | 57   | 57   | FGIVTSSAGTGTTEDTEAK                 | 19 | 936,45  | 1870,88 |
| 7176  | IPI00018465 | 33,9 | 33,9 | TFSYAGFE(M)QPK                      | 12 | 711,32  | 1420,63 |
| 14085 | IPI00018465 | 40   | 40   | LPIGDVATQYFADR                      | 14 | 783,40  | 1564,79 |
| 4722  | IPI00141318 | 40,9 | 40,9 | QDIAFAYQR                           | 9  | 556,28  | 1110,54 |
| 8388  | IPI00141318 | 56,9 | 56,9 | LEGLGSSEADQDGLASTVR                 | 19 | 952,96  | 1903,91 |
| 12307 | IPI00031804 | 33,8 | 33,8 | LTL SALIDGK                         | 10 | 515,81  | 1029,61 |
| 12307 | IPI00031804 | 33,8 | 33,8 | LTL SALLDGK                         | 10 | 515,81  | 1029,61 |
| 13597 | IPI00031804 | 46,1 | 46,1 | LTLDTIFVPNTGK                       | 13 | 709,90  | 1417,78 |
| 8698  | IPI00384016 | 45   | 45   | VEGGTPLFTLR                         | 11 | 595,33  | 1188,65 |
| 6544  | IPI00384016 | 32,6 | 32,6 | TPAFAESVTEGDVR                      | 14 | 739,86  | 1477,70 |
| 9231  | IPI00019755 | 56,3 | 56,3 | EDPTVSALLTSEK                       | 13 | 695,36  | 1388,70 |
| 15505 | IPI00026087 | 56,1 | 56,1 | DFVAEP(M)GEKPVGSLAGIGEV LGK         | 24 | 806,09  | 2415,24 |
| 14997 | IPI00220503 | 50,3 | 50,3 | LLGPDAAINLTD PDGALAK                | 19 | 933,00  | 1863,99 |
| 9611  | IPI00014263 | 42,7 | 42,7 | EALTYDGALLGDR                       | 13 | 697,35  | 1392,69 |

|                   |      |                             |    |         |         |
|-------------------|------|-----------------------------|----|---------|---------|
| 5850 IPI00299573  | 39,3 | 39,3 NFGIGQDIQPK            | 11 | 608,82  | 1215,62 |
| 19290 IPI00013122 | 54,9 | 54,9 LGPGGLDPVEVYESLPEELQK  | 21 | 1135,08 | 2268,15 |
| 3411 IPI00140827  | 54,9 | 54,9 VAGQDGSVVQFK           | 12 | 617,82  | 1233,63 |
| 9736 IPI00006211  | 43,7 | 43,7 GPFTDVVTTNLK           | 12 | 646,35  | 1290,68 |
| 9501 IPI00179589  | 42,3 | 42,3 GPDGLTAFEATDNQAIK      | 17 | 874,43  | 1746,84 |
| 5798 IPI00465260  | 32,1 | 32,1 TVNVVQFEPK             | 11 | 624,33  | 1246,65 |
| 19028 IPI00465260 | 39,5 | 39,5 TFFSFPAVVAPFK          | 13 | 729,39  | 1456,77 |
| 19320 IPI00465260 | 32,7 | 32,7 TLYVEEVVVPNVIEPSFGLGR  | 20 | 1109,59 | 2217,17 |
| 15350 IPI00216682 | 41,1 | 41,1 DGIILCELINK            | 11 | 644,35  | 1286,69 |
| 4385 IPI00031801  | 54   | 54 GAEAAANVTGPDGVPVEGSR     | 19 | 891,93  | 1781,85 |
| 2464 IPI00217030  | 35   | 35 YALTGDEVK                | 9  | 498,26  | 994,50  |
| 10478 IPI00217030 | 38,6 | 38,6 FDTGNLC(M)VTGGANLGR    | 17 | 899,91  | 1797,81 |
| 16240 IPI00217030 | 34,7 | 34,7 TDITYPAGF(M)DVISIDK    | 17 | 951,46  | 1900,91 |
| 19005 IPI00375511 | 36,2 | 36,2 FFEVILIDPFHK           | 12 | 502,28  | 1503,81 |
| 8981 IPI00375511  | 45,9 | 45,9 VLNSYWVGEDSTYK         | 14 | 830,90  | 1659,78 |
| 10591 IPI00218342 | 47,6 | 47,6 YVVVTGITPTPLGEGK       | 16 | 815,96  | 1629,90 |
| 8748 IPI00000861  | 42,4 | 42,4 GFSVVADTPELQR          | 13 | 709,87  | 1417,72 |
| 19173 IPI00017596 | 53,1 | 53,1 FQDNFEFVQWFK           | 12 | 817,89  | 1633,76 |
| 16040 IPI00026302 | 53   | 53 LYTLVTYVPVTTFK           | 14 | 822,97  | 1643,92 |
| 14897 IPI00003348 | 53   | 53 ACGDSTLTQITAGLDPVGR      | 19 | 966,48  | 1930,94 |
| 18880 IPI00219525 | 52,8 | 52,8 LVPLLDTGDIIDGGNSEYR    | 20 | 1080,56 | 2159,11 |
| 13442 IPI00061178 | 52,4 | 52,4 GFAFVTFESPADAK         | 14 | 743,87  | 1485,72 |
| 8716 IPI00290566  | 52,3 | 52,3 EQLAIAEFAR             | 10 | 574,31  | 1146,60 |
| 6081 IPI00015361  | 43,5 | 43,5 IQQLTALGAAQATAK        | 15 | 742,93  | 1483,84 |
| 20018 IPI00015361 | 30,1 | 30,1 NQLDQEVEFLSTSIAQLK     | 18 | 688,36  | 2062,05 |
| 3144 IPI00550021  | 47,9 | 47,9 TVFAEHISDECK           | 12 | 718,33  | 1434,64 |
| 15037 IPI00007611 | 54,9 | 54,9 GEVPCTVTSASPLEEATLSELK | 22 | 1159,58 | 2317,14 |
| 16237 IPI00005154 | 51,5 | 51,5 ADVIQATGDAICIFR        | 15 | 825,42  | 1648,82 |
| 20350 IPI00028109 | 51,2 | 51,2 ERPPNPIEFLASYLLK       | 16 | 629,68  | 1886,03 |
| 17370 IPI00105598 | 35,7 | 35,7 EQSILELGSLAK           | 13 | 700,90  | 1399,79 |

|       |             |      |      |                                   |    |         |         |
|-------|-------------|------|------|-----------------------------------|----|---------|---------|
| 14187 | IPI00105598 | 29,2 | 29,2 | LYDNLLEQNLIR                      | 12 | 752,41  | 1502,81 |
| 3286  | IPI00060181 | 50,4 | 50,4 | ADLNQGIGEPQSPSR                   | 15 | 784,89  | 1567,76 |
| 2961  | IPI00419880 | 40,3 | 40,3 | TTDGYLLR                          | 8  | 469,75  | 937,49  |
| 3699  | IPI00005978 | 35,1 | 35,1 | VGDVYIPR                          | 8  | 459,76  | 917,50  |
| 8816  | IPI00329633 | 40,6 | 40,6 | NELSGALTGLTR                      | 12 | 616,34  | 1230,66 |
| 6531  | IPI00010810 | 50,1 | 50,1 | LGGEVSCLVAGTK                     | 13 | 645,84  | 1289,66 |
| 15552 | IPI00032460 | 49,8 | 49,8 | YVQLPADEVDTQLLQDAAR               | 19 | 1073,05 | 2144,08 |
| 19118 | IPI00004656 | 48,9 | 48,9 | SNFLNCYVSGFHPSDIEVDLLK            | 22 | 852,08  | 2553,22 |
| 11751 | IPI00642816 | 48,8 | 48,8 | VTDDLVLVYK                        | 11 | 662,84  | 1323,67 |
| 18063 | IPI00015911 | 39,7 | 39,7 | NLGLEELGIELDPR                    | 14 | 784,42  | 1566,82 |
| 9031  | IPI00015911 | 33   | 33   | NETLGGTCLNVGCIPSK                 | 17 | 910,44  | 1818,86 |
| 13490 | IPI00029750 | 48,6 | 48,6 | TTGFG(M)IYDSL DYAK                | 15 | 849,39  | 1696,77 |
| 8998  | IPI00002520 | 48,1 | 48,1 | VLELVSITANK                       | 11 | 593,86  | 1185,70 |
| 14805 | IPI00219156 | 39,6 | 39,6 | VCTLAIIDPGDSDIIR                  | 16 | 879,46  | 1756,91 |
| 10845 | IPI00328319 | 47,8 | 47,8 | TPSSDVLVFDYTK                     | 13 | 736,37  | 1470,73 |
| 9293  | IPI00383751 | 29   | 29   | EQFLDGDGWTSR                      | 12 | 705,82  | 1409,62 |
| 8978  | IPI00033561 | 47,6 | 47,6 | GYAYVEFENPDEAEK                   | 15 | 880,89  | 1759,76 |
| 10281 | IPI00025491 | 31,7 | 31,7 | (M)FVLDEADE(M)LSR                 | 13 | 794,35  | 1586,69 |
| 3311  | IPI00218144 | 47,5 | 47,5 | PGLVDSNPAPPESQEK                  | 16 | 832,91  | 1663,80 |
| 4112  | IPI00219330 | 47,5 | 47,5 | VLQD(M)GLPTGAEGR                  | 14 | 730,36  | 1458,71 |
| 18370 | IPI00303207 | 47   | 47   | ADIF(M)FDEPSSYLDVK                | 16 | 946,93  | 1891,85 |
| 3001  | IPI00013895 | 39   | 39   | DGYNYTLSK                         | 9  | 530,75  | 1059,49 |
| 20710 | IPI00013895 | 33,3 | 33,3 | KLDTNSDGLDFSEFLNLIGGLA(M)ACHDSFLK | 32 | 893,93  | 3571,69 |
| 15100 | IPI00020599 | 47,1 | 47,1 | FYALSASFEPFSNK                    | 14 | 804,39  | 1606,76 |
| 15100 | IPI00020599 | 47,1 | 47,1 | FYALSAXFEPFSNK                    | 14 | 804,39  | 1606,76 |
| 3439  | IPI00306398 | 46,3 | 46,3 | LPTDLTACDNR                       | 11 | 638,30  | 1274,59 |
| 16442 | IPI00012102 | 46,2 | 46,2 | WQTLLSVDDLVEK                     | 13 | 773,41  | 1544,81 |
| 5002  | IPI00641950 | 37,4 | 37,4 | IWDLEGK                           | 7  | 430,73  | 859,44  |
| 18453 | IPI00641950 | 30,5 | 30,5 | HLYTL DGGDIINALCFSPNR             | 20 | 759,38  | 2275,11 |
| 4855  | IPI00299024 | 45,5 | 45,5 | AQGPAASAEPPKPVEAPAANS DQTVTVK     | 28 | 921,80  | 2762,37 |

|       |             |      |      |                       |    |         |         |
|-------|-------------|------|------|-----------------------|----|---------|---------|
| 18753 | IPI00140420 | 45,3 | 45,3 | NLPGLVQEGEPFSEEATLFTK | 21 | 1153,58 | 2305,15 |
| 9493  | IPI00792971 | 45,3 | 45,3 | TPYTDVNIIVTIR         | 12 | 696,38  | 1390,75 |
| 7021  | IPI00005719 | 29,8 | 29,8 | LQIWDTAGQER           | 11 | 658,83  | 1315,65 |
| 19093 | IPI00005719 | 33,8 | 33,8 | EFADSLGIPFLETSAK      | 16 | 862,94  | 1723,87 |
| 4050  | IPI00029623 | 45,1 | 45,1 | HITIFSPEGR            | 10 | 578,81  | 1155,60 |
| 4300  | IPI00030179 | 29,3 | 29,3 | VLQLLR                | 6  | 371,25  | 740,49  |
| 3559  | IPI00030179 | 34,9 | 34,9 | SVNELIYK              | 8  | 483,27  | 964,52  |
| 8921  | IPI00335168 | 44,5 | 44,5 | EAFQLFDR              | 8  | 513,26  | 1024,50 |
| 15672 | IPI00032851 | 44,3 | 44,3 | GEDVPLTEQTVSQVLQSAK   | 19 | 1015,02 | 2028,04 |
| 16510 | IPI00306369 | 40,9 | 40,9 | SEGALELADVSNELPGLK    | 18 | 921,48  | 1840,94 |
| 3281  | IPI00374686 | 44   | 44   | IETIEV(M)EDR          | 10 | 625,80  | 1249,58 |
| 16457 | IPI00478292 | 44   | 44   | ELPTAFDYVEFTR         | 13 | 794,39  | 1586,76 |
| 19205 | IPI00013877 | 43,9 | 43,9 | ATENDIANFFSPLNPIR     | 17 | 959,99  | 1917,96 |
| 11463 | IPI00219446 | 43,8 | 43,8 | GNDISSGTVLSDYVGSPPK   | 20 | 975,48  | 1948,94 |
| 5648  | IPI00021766 | 43,6 | 43,6 | GPLPAAPPVAPER         | 13 | 636,36  | 1270,70 |
| 12732 | IPI00008240 | 43,4 | 43,4 | GFVLQDTVEQLR          | 12 | 702,88  | 1403,74 |
| 6236  | IPI00030255 | 43,3 | 43,3 | LVGPEEALSPGEAR        | 14 | 712,87  | 1423,73 |
| 18315 | IPI00008438 | 43,1 | 43,1 | IAIYELLFK             | 9  | 555,33  | 1108,65 |
| 13210 | IPI00413451 | 43   | 43   | IAELLSPGSVDPLTR       | 15 | 784,44  | 1566,86 |
| 13582 | IPI00018398 | 42,8 | 42,8 | VDILDPALLR            | 10 | 562,84  | 1123,66 |
| 9823  | IPI00018398 | 35,5 | 35,5 | (M)ATEVAADALGEEWK     | 15 | 818,88  | 1635,74 |
| 7009  | IPI00395627 | 42,5 | 42,5 | TDTVLILCR             | 9  | 545,80  | 1089,58 |
| 6266  | IPI00816809 | 42,5 | 42,5 | DLEGTYLICR            | 9  | 563,76  | 1125,51 |
| 8393  | IPI00218847 | 42,4 | 42,4 | IELLGSYDPQK           | 11 | 631,83  | 1261,65 |
| 7059  | IPI00027252 | 31,2 | 31,2 | FNASQLITQR            | 10 | 589,32  | 1176,62 |
| 19078 | IPI00009236 | 42,1 | 42,1 | IDFEDVIAEPEGTHSFDGIWK | 21 | 802,38  | 2404,12 |
| 20128 | IPI00298994 | 42,1 | 42,1 | GVGAAATAVTQALNELLQHVK | 21 | 697,72  | 2090,14 |
| 7069  | IPI00221093 | 42   | 42   | VCEEIAIIPSK           | 11 | 629,84  | 1257,66 |
| 12770 | IPI00015671 | 35,8 | 35,8 | SFGGGTGSFGFTSLL(M)ER  | 17 | 860,41  | 1718,80 |
| 9813  | IPI00215911 | 41,9 | 41,9 | EEAPDILCLQETK         | 13 | 773,38  | 1544,74 |



|                   |      |                                    |    |         |         |
|-------------------|------|------------------------------------|----|---------|---------|
| 18620 IPI00328753 | 41,9 | 41,9 SVEELLEAELLK                  | 12 | 686,88  | 1371,75 |
| 11004 IPI00646762 | 37,1 | 37,1 EQTADGVAVIPVLQR               | 15 | 798,44  | 1594,87 |
| 14825 IPI00024403 | 41,8 | 41,8 DIVQFVPPFR                    | 9  | 560,81  | 1119,61 |
| 6386 IPI00302850  | 60,1 | 60,1 LADALQELR                     | 9  | 514,79  | 1027,56 |
| 20670 IPI00302850 | 35,1 | 35,1 YFILPDSLPLDTLLVDVEPK          | 20 | 763,09  | 2286,24 |
| 12197 IPI00031697 | 41,3 | 41,3 EAPVDVLTQIGR                  | 12 | 649,36  | 1296,71 |
| 16160 IPI00024175 | 36   | 36 AITVFSPDGHLFQVEYAQEAVK          | 22 | 817,09  | 2448,23 |
| 6704 IPI00442278  | 33,9 | 33,9 FINEVLR                       | 7  | 445,76  | 889,50  |
| 8338 IPI00215743  | 39,8 | 39,8 SHVEDGDIAGAPASSPEAPPAEQDPVQLK | 29 | 971,47  | 2911,38 |
| 10583 IPI00013297 | 29,7 | 29,7 GVEGLIDIENPNR                 | 13 | 713,37  | 1424,72 |
| 17553 IPI00031522 | 38   | 38 TVLGTPEVLLGALPGAGGTQR           | 21 | 1004,07 | 2006,12 |
| 8298 IPI00177817  | 39   | 39 IGIFGQDEDVTSK                   | 13 | 704,85  | 1407,69 |
| 16925 IPI00163505 | 38,6 | 38,6 DLEEFFSTVGK                   | 11 | 636,31  | 1270,61 |
| 8643 IPI00009104  | 38,3 | 38,3 GLGLDDALEPR                   | 11 | 578,30  | 1154,59 |
| 6019 IPI00217468  | 38   | 38 ATGPPVSELITK                    | 12 | 606,84  | 1211,68 |
| 2351 IPI00384051  | 38   | 38 DEAAYGELR                       | 9  | 512,24  | 1022,47 |
| 4090 IPI00215901  | 37,5 | 37,5 APSVPAAEPEYPK                 | 13 | 678,34  | 1354,67 |
| 3264 IPI00759644  | 37,5 | 37,5 GVQVETISPGDGR                 | 13 | 657,83  | 1313,66 |
| 10888 IPI00641582 | 37,5 | 37,5 VQGLEQAVDNFEGK                | 14 | 767,38  | 1532,75 |
| 17155 IPI00018452 | 37,4 | 37,4 SDPFLEFFR                     | 9  | 579,28  | 1156,55 |
| 4315 IPI00163187  | 37,2 | 37,2 LSCFAQTVSPA EK                | 13 | 719,36  | 1436,70 |
| 9476 IPI00019770  | 31,6 | 31,6 FVNVVPTFGK                    | 10 | 554,31  | 1106,61 |
| 4220 IPI00026216  | 61,1 | 61,1 GDYPLEAVR                     | 9  | 510,26  | 1018,51 |
| 15680 IPI00026216 | 37   | 37 VLGATLLPDLIQK                   | 13 | 690,93  | 1379,84 |
| 12812 IPI00017726 | 36,9 | 36,9 LVGQGASAVLLDL PNSGGEAQAK      | 23 | 1098,09 | 2194,16 |
| 4890 IPI00297579  | 36,8 | 36,8 KVEEAEP EEFVVEK               | 14 | 831,42  | 1660,82 |
| 15310 IPI00033025 | 38,5 | 38,5 NLEGYVGFANLPNQVYR             | 17 | 977,49  | 1952,97 |
| 14310 IPI00003918 | 36,5 | 36,5 IEEVPELPLVVEDK                | 14 | 804,94  | 1607,87 |
| 3351 IPI00027223  | 36,4 | 36,4 VEITYTPSDGTQK                 | 13 | 719,86  | 1437,70 |
| 12477 IPI00016610 | 30,4 | 30,4 IITLTGPTNAIFK                 | 13 | 694,91  | 1387,81 |

|                   |      |                                   |    |         |         |
|-------------------|------|-----------------------------------|----|---------|---------|
| 20280 IPI00293533 | 36,2 | 36,2 ELEDLLSPLEELVK               | 14 | 813,94  | 1625,87 |
| 2529 IPI00219301  | 36,1 | 36,1 GEPAAAAAPEAGASPVEK           | 18 | 811,90  | 1621,79 |
| 16658 IPI00103525 | 36   | 36 LFVGNLPTDITEEDFK               | 16 | 919,46  | 1836,91 |
| 7111 IPI00021828  | 35,6 | 35,6 SQVVAGTNYFIK                 | 12 | 663,86  | 1325,70 |
| 11698 IPI00220362 | 32,5 | 32,5 DYFLFR                       | 6  | 430,72  | 859,42  |
| 16322 IPI00016342 | 32,5 | 32,5 DPENFPFVVLGNK                | 13 | 738,38  | 1474,74 |
| 14852 IPI00016342 | 31,9 | 31,9 EAINVEQAFQTIAR               | 14 | 795,42  | 1588,82 |
| 2966 IPI00017704  | 32,9 | 32,9 EFVISDR                      | 7  | 433,22  | 864,43  |
| 11403 IPI00414127 | 35,4 | 35,4 TLEEDDEELFK                  | 11 | 691,32  | 1380,63 |
| 20760 IPI00026970 | 35,3 | 35,3 TL(M)VDPSQEVQENYNFLLQLQEELLK | 26 | 1046,53 | 3136,56 |
| 19053 IPI00020042 | 35,2 | 35,2 PQTGLSFLGPEPEDLEDLYSR        | 21 | 1182,08 | 2362,14 |
| 19428 IPI00024664 | 35,1 | 35,1 IGEWELIQESGVPLKPLFGPGYTGIR   | 26 | 952,85  | 2855,52 |
| 20590 IPI00216184 | 34,4 | 34,4 GDIPDLSQAPSSLLDALEQHLASLEGK  | 27 | 935,48  | 2803,42 |
| 14687 IPI00021831 | 34,1 | 34,1 LTVADALEPVQFEDGQK            | 17 | 930,47  | 1858,93 |
| 3099 IPI00012007  | 34   | 34 FDNLYGCR                       | 8  | 522,73  | 1043,45 |
| 19365 IPI00009071 | 33,9 | 33,9 YGPIVDVYVPLDFYTR             | 16 | 958,99  | 1915,97 |
| 6829 IPI00793696  | 33,8 | 33,8 AITGASLADI(M)AK              | 13 | 639,34  | 1276,67 |
| 19295 IPI00008552 | 33,2 | 33,2 YEISSVPTFLFFK                | 13 | 789,42  | 1576,82 |
| 16235 IPI00219622 | 33,1 | 33,1 LAQQYYLVYQEPIPTAQLVQR        | 21 | 841,12  | 2520,34 |
| 9376 IPI00010951  | 42,7 | 42,7 DAGQISGLNVLR                 | 12 | 621,84  | 1241,67 |
| 19090 IPI00010720 | 32,8 | 32,8 LGFAGLVQEISFGTTK             | 16 | 834,45  | 1666,89 |
| 3784 IPI00031691  | 31,2 | 31,2 GVTLGFR                      | 7  | 375,22  | 748,42  |
| 18635 IPI00024364 | 32,6 | 32,6 ICEDSAEILDSDVLDLDRPLNI(M)IPK | 24 | 924,80  | 2771,37 |
| 14545 IPI00005198 | 29,1 | 29,1 ILPTLEAVAALGNK               | 14 | 705,42  | 1408,83 |
| 4652 IPI00216237  | 32,4 | 32,4 EVCGFAPYER                   | 10 | 614,28  | 1226,54 |
| 6259 IPI00017964  | 32,2 | 32,2 VAQLEQVYIR                   | 10 | 609,84  | 1217,68 |
| 13637 IPI00054042 | 31,9 | 31,9 DQSAVVVQGLPEGVAFK            | 17 | 872,47  | 1742,92 |
| 9358 IPI00175098  | 31,7 | 31,7 FNADEFED(M)VAEK              | 13 | 780,83  | 1559,64 |
| 8593 IPI00075248  | 31,7 | 31,7 EAFSLFDK                     | 8  | 478,74  | 955,46  |
| 19880 IPI00412545 | 31,6 | 31,6 KLEDQLQGGQLEEVILQAEHELNLAR   | 26 | 744,14  | 2972,54 |

|                   |      |                              |    |        |         |
|-------------------|------|------------------------------|----|--------|---------|
| 19383 IPI00021347 | 31,4 | 31,4 TDQVIQSLIALVNDPQPEHPLR  | 22 | 828,45 | 2482,32 |
| 8663 IPI00329200  | 31,2 | 31,2 SLVEIADTVPK             | 11 | 586,33 | 1170,65 |
| 6331 IPI00335061  | 31,1 | 31,1 LESPTVSTLTPSSPGK        | 16 | 800,92 | 1599,83 |
| 7441 IPI00017855  | 31,1 | 31,1 NAVTQEFQVVPDTAR         | 15 | 801,40 | 1600,78 |
| 18775 IPI00412987 | 31   | 31 LVVLDEELEGISPDELKDELPER   | 23 | 879,79 | 2636,34 |
| 18995 IPI00031670 | 30,9 | 30,9 SVLTGGLDALEFIGK         | 15 | 760,42 | 1518,83 |
| 4662 IPI00291922  | 30,7 | 30,7 SSLIHLK                 | 7  | 387,26 | 772,50  |
| 6039 IPI00291922  | 29,5 | 29,5 ITSPL(M)EPSSIEK         | 13 | 724,37 | 1446,73 |
| 20690 IPI00023234 | 30,7 | 30,7 LQADDFLQDYTLINILHSEDLGK | 24 | 925,48 | 2773,41 |
| 13392 IPI00096066 | 30,6 | 30,6 FFVADTANEALEAAK         | 15 | 798,90 | 1595,78 |
| 7516 IPI00026185  | 30,5 | 30,5 STLNEIYFGK              | 10 | 586,30 | 1170,59 |
| 12875 IPI00002821 | 31,6 | 31,6 LVAVDVIDQNR             | 12 | 677,89 | 1353,76 |
| 4770 IPI00011454  | 30,3 | 30,3 NPEPELLVR               | 9  | 533,80 | 1065,58 |
| 4072 IPI00004503  | 29,7 | 29,7 TVESITDIR               | 9  | 517,28 | 1032,54 |
| 12562 IPI00641926 | 29,6 | 29,6 DFLKPELLR               | 10 | 622,37 | 1242,73 |
| 9688 IPI00794449  | 29,6 | 29,6 AVLYQVLEMK              | 10 | 597,33 | 1192,65 |
| 15567 IPI00375631 | 29,3 | 29,3 VPLASQGLGPGSTVLLVVDK    | 20 | 975,57 | 1949,12 |
| 3506 IPI00719633  | 29,1 | 29,1 FSSVQLR                 | 7  | 418,73 | 835,45  |
| 13862 IPI00003949 | 31   | 31 YFHVVIAGPQDSPFEGGTFK      | 20 | 732,70 | 2195,07 |
| 8030 IPI00220365  | 48,8 | 48,8 VEVTEFEDIK              | 10 | 604,81 | 1207,60 |
| 6444 IPI00220365  | 58,3 | 58,3 LGDLYEEEMR              | 10 | 627,79 | 1253,56 |
| 4490 IPI00745518  | 74,4 | 74,4 ESTLHLVLR               | 9  | 534,31 | 1066,61 |
| 3922 IPI00375498  | 55,8 | 55,8 VDAQFGGIDQR             | 11 | 603,30 | 1204,58 |
| 12905 IPI00375498 | 80,5 | 80,5 NIEDVIAQGIGK            | 12 | 628,85 | 1255,68 |
| 12872 IPI00375498 | 56,2 | 56,2 IFDSEEILAGYK            | 12 | 692,85 | 1383,69 |
| 5062 IPI00179953  | 29,4 | 29,4 EVSEEQPVVTLEK           | 13 | 743,89 | 1485,76 |
| 5678 IPI00025091  | 58   | 58 TIAQDYGVLK                | 10 | 554,31 | 1106,60 |

## Suppl Table 4: May Control Peptides

| Scan# | IPI0000000# | Score# | Top score | Sequence                           | Pep.Lengt | m/z    | Neutral mass (exp) |
|-------|-------------|--------|-----------|------------------------------------|-----------|--------|--------------------|
| 6207  | IPI00418471 | 44,8   | 44,8      | FANYIDK                            | 7         | 435,72 | 869,43             |
| 6282  | IPI00418471 | 42,4   | 42,4      | LQEEMLQR                           | 8         | 523,77 | 1045,52            |
| 7282  | IPI00418471 | 85,1   | 85,1      | FADLSEAANR                         | 10        | 547,27 | 1092,52            |
| 12057 | IPI00418471 | 74,3   | 74,3      | EYQDLLNVK                          | 9         | 561,30 | 1120,58            |
| 3846  | IPI00418471 | 39,8   | 39,8      | LQDEIQN(M)K                        | 9         | 567,78 | 1133,54            |
| 18397 | IPI00418471 | 95,8   | 95,8      | ILLAELEQLK                         | 10        | 585,36 | 1168,71            |
| 7954  | IPI00418471 | 90,2   | 90,2      | LGDLYEEE(M)R                       | 10        | 635,78 | 1269,55            |
| 15072 | IPI00418471 | 85,1   | 85,1      | (M)ALDIEIATYR                      | 11        | 656,33 | 1310,65            |
| 9054  | IPI00418471 | 88,7   | 88,7      | EEAENTLQSFR                        | 11        | 662,31 | 1322,61            |
| 19192 | IPI00418471 | 80,7   | 80,7      | VESLQEEIAFLK                       | 12        | 469,26 | 1404,75            |
| 8686  | IPI00418471 | 96,4   | 96,4      | SLYASSPGGVYATR                     | 14        | 714,86 | 1427,70            |
| 16394 | IPI00418471 | 99,7   | 99,7      | KVESLQEEIAFLK                      | 13        | 767,43 | 1532,84            |
| 23242 | IPI00418471 | 76     | 76        | ISLPLPNFSSLNLR                     | 14        | 785,95 | 1569,89            |
| 24184 | IPI00418471 | 57,6   | 57,6      | ISLPLP(N)FSSLNLR                   | 14        | 786,44 | 1570,87            |
| 12724 | IPI00418471 | 97,5   | 97,5      | ETNLDSLPLVDTHSK                    | 15        | 834,92 | 1667,83            |
| 22357 | IPI00418471 | 52,3   | 52,3      | LHEEEIQELQAQIQEQHVQIDVDVSKPDLTAALR | 34        | 785,41 | 3922,01            |
| 11892 | IPI00302592 | 47,9   | 47,9      | LLGWIQNK                           | 8         | 486,29 | 970,56             |
| 11062 | IPI00302592 | 71,4   | 71,4      | SPFEVYVDK                          | 9         | 542,27 | 1082,53            |
| 10016 | IPI00302592 | 39,8   | 39,8      | (N)GHVGISFVPK                      | 11        | 578,31 | 1154,61            |
| 11949 | IPI00302592 | 79,5   | 79,5      | AWGPGLEGGVVGK                      | 13        | 613,83 | 1225,64            |
| 22742 | IPI00302592 | 89,6   | 89,6      | LIALLEVLSQK                        | 11        | 613,89 | 1225,76            |
| 10484 | IPI00302592 | 76,7   | 76,7      | LTVSSLQESGLK                       | 12        | 631,35 | 1260,69            |
| 8989  | IPI00302592 | 55     | 55        | YGGQPVPNFPSK                       | 12        | 645,83 | 1289,64            |
| 9911  | IPI00302592 | 39,1   | 39,1      | YGGPYHIGGSPFK                      | 13        | 460,56 | 1378,67            |
| 15217 | IPI00302592 | 35     | 35        | YGGDEIPFSPYR                       | 12        | 700,83 | 1399,64            |
| 14367 | IPI00302592 | 92,7   | 92,7      | IANLQTDLSDGLR                      | 13        | 708,38 | 1414,74            |
| 10967 | IPI00302592 | 83,2   | 83,2      | EAGAGGLAIAVEGPSK                   | 16        | 713,88 | 1425,74            |
| 10381 | IPI00302592 | 64,2   | 64,2      | ANLPQSFQVDTSK                      | 13        | 717,86 | 1433,71            |
| 10717 | IPI00302592 | 58,7   | 58,7      | FADQHVPGPSFVSK                     | 14        | 505,92 | 1514,75            |

|       |             |      |      |                                    |    |         |         |
|-------|-------------|------|------|------------------------------------|----|---------|---------|
| 6007  | IPI00302592 | 60,8 | 60,8 | FVPAE(M)GTHTVSVK                   | 14 | 759,88  | 1517,75 |
| 10492 | IPI00302592 | 90,4 | 90,4 | GAGTGGLGLAVEGPSEAK                 | 18 | 785,91  | 1569,80 |
| 8544  | IPI00302592 | 68,8 | 68,8 | TGVAVNKPAEFTVDAK                   | 16 | 549,63  | 1645,87 |
| 17289 | IPI00302592 | 37,2 | 37,2 | TFSVWYVPEVTGTHK                    | 15 | 584,30  | 1749,87 |
| 17414 | IPI00302592 | 32,1 | 32,1 | VTYTP(M)APGSYLISIK                 | 16 | 878,96  | 1755,91 |
| 16912 | IPI00302592 | 83,2 | 83,2 | VTYCPTEPGNYIINIK                   | 16 | 941,47  | 1880,93 |
| 13587 | IPI00302592 | 67,2 | 67,2 | VHSPSGALEECYVTEIDQDK               | 20 | 759,68  | 2276,03 |
| 14782 | IPI00302592 | 59,3 | 59,3 | GQHVPGSPFQFTVGPLGEGGAHK            | 23 | 576,79  | 2303,14 |
| 12814 | IPI00302592 | 32,7 | 32,7 | SAGQGEVLVYVEDPAGHQEEAK             | 22 | 771,70  | 2312,09 |
| 21117 | IPI00302592 | 93,6 | 93,6 | ASGPGLNTTGVPASLPVEFTIDAK           | 24 | 1171,61 | 2341,21 |
| 16047 | IPI00302592 | 99,4 | 99,4 | VSGQGLHEGHTFEPAEFIIDTR             | 22 | 814,07  | 2439,18 |
| 12069 | IPI00302592 | 46,2 | 46,2 | THIQDNHDGTYTVAYVPDVTGR             | 22 | 820,39  | 2458,15 |
| 18347 | IPI00302592 | 58,2 | 58,2 | FNEEHIPDSPFVVPVASPSGDAR            | 23 | 823,07  | 2466,18 |
| 19312 | IPI00302592 | 90,2 | 90,2 | LQVEPAVDTSQVQCYGPGIEGQGVFR         | 26 | 921,78  | 2762,33 |
| 19352 | IPI00302592 | 75,1 | 75,1 | FGGEHVPNSPFQVTALAGDQPSVQPPLR       | 28 | 982,50  | 2944,48 |
| 21272 | IPI00302592 | 83,8 | 83,8 | ALGALVDSCAPGLCPDWDSWDASKPVTNAR     | 30 | 1077,17 | 3228,49 |
| 22647 | IPI00302592 | 81,2 | 81,2 | EEGPYEVEVTYDGVVPVPGSPFPLEAVAPTKPSK | 33 | 1162,58 | 3484,73 |
| 15222 | IPI00011654 | 71   | 71   | YLTVAAVFR                          | 9  | 520,30  | 1038,59 |
| 10844 | IPI00011654 | 62,5 | 62,5 | FPGQLNADLR                         | 10 | 565,80  | 1129,59 |
| 11634 | IPI00011654 | 56,9 | 56,9 | ISEQFTA(M)FR                       | 10 | 623,30  | 1244,59 |
| 17859 | IPI00011654 | 56,7 | 56,7 | AILVDLEPGTMDSVR                    | 15 | 808,42  | 1614,83 |
| 15144 | IPI00011654 | 57,7 | 57,7 | AILVDLEPGT(M)DSVR                  | 15 | 816,42  | 1630,82 |
| 20442 | IPI00011654 | 98,3 | 98,3 | ALTVPELTQQVFDK                     | 15 | 830,45  | 1658,89 |
| 19552 | IPI00011654 | 79,4 | 79,4 | NSSYFVEWIPNNVK                     | 14 | 848,92  | 1695,82 |
| 20432 | IPI00011654 | 45,8 | 45,8 | NSSYFVEWIP(N)NVK                   | 14 | 849,41  | 1696,81 |
| 20432 | IPI00011654 | 45,8 | 45,8 | NSSYFVEWIP(N)VK                    | 14 | 849,41  | 1696,81 |
| 22767 | IPI00011654 | 93,9 | 93,9 | (M)AVTFIGNSTAIQELFK                | 17 | 943,49  | 1884,97 |
| 24792 | IPI00011654 | 48,7 | 48,7 | (M)AVTFIGNSTAIQELFK                | 17 | 943,98  | 1885,95 |
| 22337 | IPI00011654 | 98   | 98   | GHYTEGAELVDSVLDVVR                 | 18 | 653,67  | 1957,97 |
| 24902 | IPI00011654 | 58,1 | 58,1 | LTTPTYGDLNHLVSATMSGVTTCLR          | 25 | 903,45  | 2707,33 |

|       |             |      |      |                                    |    |         |         |
|-------|-------------|------|------|------------------------------------|----|---------|---------|
| 21224 | IPI00011654 | 83,1 | 83,1 | LTTPTYGDLNHLVSAT(M)SGVTTCLR        | 25 | 908,78  | 2723,32 |
| 22582 | IPI00011654 | 40,5 | 40,5 | SGPFGQIFRPDNFVFGQSGAGNNWAK         | 26 | 933,45  | 2797,33 |
| 22864 | IPI00011654 | 43,3 | 43,3 | SGPFGQIFRPD(N)FVFGQSGAGNNWAK       | 26 | 933,78  | 2798,32 |
| 23317 | IPI00011654 | 94,8 | 94,8 | SGPFGQIFRPDNFVFGQSGAG(N)NWAK       | 26 | 933,78  | 2798,32 |
| 21294 | IPI00011654 | 83,9 | 83,9 | EAESCDLQGFQLTHSLGGGTGSGMGTTLLISK   | 32 | 1104,51 | 3310,52 |
| 6610  | IPI00465248 | 45,9 | 45,9 | SCNCLLLK                           | 8  | 504,25  | 1006,49 |
| 7654  | IPI00465248 | 36,8 | 36,8 | SC(N)CLLLK                         | 8  | 504,75  | 1007,48 |
| 6050  | IPI00465248 | 88,8 | 88,8 | LMIE(M)DGTENK                      | 11 | 648,79  | 1295,57 |
| 5120  | IPI00465248 | 53,4 | 53,4 | L(M)IE(M)DGTENK                    | 11 | 656,79  | 1311,57 |
| 15012 | IPI00465248 | 90,5 | 90,5 | GNPTVEVDLFTSK                      | 13 | 703,86  | 1405,71 |
| 17937 | IPI00465248 | 52,4 | 52,4 | YISPDQLADLYK                       | 12 | 713,37  | 1424,72 |
| 8336  | IPI00465248 | 33,7 | 33,7 | LAQA(N)GWGV(M)VSHR                 | 14 | 514,92  | 1541,74 |
| 11287 | IPI00465248 | 99,5 | 99,5 | VNQIGSVTESLQACK                    | 15 | 817,41  | 1632,81 |
| 12902 | IPI00465248 | 92,2 | 92,2 | V(N)QIGSVTESLQACK                  | 15 | 817,91  | 1633,80 |
| 12902 | IPI00465248 | 92,2 | 92,2 | VN(Q)IGSVTESLQACK                  | 15 | 817,91  | 1633,80 |
| 18949 | IPI00465248 | 85,8 | 85,8 | AAVPSGASTGIYEALRL                  | 18 | 902,98  | 1803,94 |
| 18754 | IPI00465248 | 69,3 | 69,3 | FTASAGIQVVGDDTLVTNPK               | 20 | 1017,03 | 2032,05 |
| 21147 | IPI00465248 | 55,9 | 55,9 | HIADLAGNSEVILPVPAF(N)VINGGSHAGNK   | 30 | 753,89  | 3011,54 |
| 21162 | IPI00465248 | 65,6 | 65,6 | HIADLAGNSEVILPVPAFNVI(N)GGSHAGNK   | 30 | 1004,86 | 3011,54 |
| 21987 | IPI00465248 | 64,8 | 64,8 | HIADLAG(N)SEVILPVPAF(N)VINGGSHAGNK | 30 | 754,14  | 3012,53 |
| 21987 | IPI00465248 | 64,8 | 64,8 | HIADLAG(N)SEVILPVPAFNVI(N)GGSHAGNK | 30 | 754,14  | 3012,53 |
| 4510  | IPI00021439 | 75,1 | 75,1 | AGFAGDDAPR                         | 10 | 488,73  | 975,44  |
| 14152 | IPI00021439 | 61,8 | 61,8 | DLTDYL(M)K                         | 8  | 507,74  | 1013,47 |
| 6730  | IPI00021439 | 73,3 | 73,3 | GYSFTTTAER                         | 10 | 566,77  | 1131,52 |
| 8854  | IPI00021439 | 46,7 | 46,7 | EITALAPSTMK                        | 11 | 581,31  | 1160,61 |
| 6505  | IPI00021439 | 73,2 | 73,2 | EITALAPST(M)K                      | 11 | 589,31  | 1176,60 |
| 8121  | IPI00021439 | 74   | 74   | IWHHTFYNELR                        | 11 | 758,38  | 1514,74 |
| 9419  | IPI00021439 | 74   | 74   | IWHHTFY(N)ELR                      | 11 | 506,25  | 1515,72 |
| 18147 | IPI00021439 | 97,7 | 97,7 | SYELPDGQVITIGNER                   | 16 | 895,95  | 1789,88 |
| 15542 | IPI00021439 | 62,1 | 62,1 | YPIEHGIVTNWDDMEK                   | 16 | 649,64  | 1945,89 |

|       |             |      |      |                                  |    |         |         |
|-------|-------------|------|------|----------------------------------|----|---------|---------|
| 13167 | IPI00021439 | 59,7 | 59,7 | YPIEHGIVTNWDD(M)EK               | 16 | 654,97  | 1961,88 |
| 15064 | IPI00021439 | 70,7 | 70,7 | KDLYANTVLSGGTT(M)YPGIADR         | 22 | 787,06  | 2358,15 |
| 19332 | IPI00021439 | 37,7 | 37,7 | TTGIV(M)DSGDGVTHTVPIYEGYALPHAILR | 30 | 800,66  | 3198,60 |
| 8249  | IPI00472102 | 83,4 | 83,4 | VGLQVVAVK                        | 9  | 456,80  | 911,58  |
| 15477 | IPI00472102 | 86,1 | 86,1 | EIGNIISDAMK                      | 11 | 595,81  | 1189,60 |
| 8074  | IPI00472102 | 31,9 | 31,9 | NAGVEGSLIVEK                     | 12 | 608,33  | 1214,65 |
| 11392 | IPI00472102 | 79,5 | 79,5 | TVIIQSWGSPK                      | 12 | 672,86  | 1343,71 |
| 23057 | IPI00472102 | 87,3 | 87,3 | GV(M)LAVDAVIAELK                 | 14 | 482,27  | 1443,80 |
| 18364 | IPI00472102 | 61,2 | 61,2 | TLNDELEIIEG(M)K                  | 13 | 760,88  | 1519,74 |
| 18109 | IPI00472102 | 59,4 | 59,4 | AAVEEGIVLGGGCALLR                | 17 | 842,96  | 1683,90 |
| 29677 | IPI00472102 | 45,9 | 45,9 | ALMLQGVDLLADAVAVTMGPK            | 21 | 705,05  | 2112,13 |
| 28132 | IPI00472102 | 45,1 | 45,1 | AL(M)LQGVDLLADAVAVTMGPK          | 21 | 710,38  | 2128,13 |
| 27104 | IPI00472102 | 71,1 | 71,1 | ALMLQGVDLLADAVAVT(M)GPK          | 21 | 1065,07 | 2128,13 |
| 25527 | IPI00472102 | 98   | 98   | AL(M)LQGVDLLADAVAVT(M)GPK        | 21 | 715,71  | 2144,12 |
| 30932 | IPI00472102 | 63,5 | 63,5 | TALLDAAGVASLLTTAEVVVTEIPKEEK     | 28 | 956,86  | 2867,57 |
| 14162 | IPI00479186 | 56,4 | 56,4 | GIFPVLCK                         | 8  | 467,26  | 932,52  |
| 8416  | IPI00479186 | 41,8 | 41,8 | VNFAMNVGK                        | 9  | 490,25  | 978,49  |
| 5705  | IPI00479186 | 70   | 70   | VNFA(M)NVGK                      | 9  | 498,25  | 994,49  |
| 8484  | IPI00479186 | 80,9 | 80,9 | GDYPLEAVR                        | 9  | 510,26  | 1018,51 |
| 11552 | IPI00479186 | 65,8 | 65,8 | LDIDSPITAR                       | 11 | 599,33  | 1196,64 |
| 7639  | IPI00479186 | 91,6 | 91,6 | ITLDNAY(M)EK                     | 10 | 607,29  | 1212,57 |
| 9326  | IPI00479186 | 52   | 52   | CCSGAIIVLTK                      | 11 | 611,32  | 1220,62 |
| 9699  | IPI00479186 | 96,5 | 96,5 | NTGIICTIGPASR                    | 13 | 680,36  | 1358,70 |
| 18872 | IPI00479186 | 95,7 | 95,7 | IYVDDGLISLQVK                    | 13 | 731,91  | 1461,81 |
| 16662 | IPI00479186 | 96,2 | 96,2 | GVNLPGAAVDLPAVSEK                | 17 | 818,95  | 1635,88 |
| 13762 | IPI00479186 | 80,2 | 80,2 | KGVNLPGAAVDLPAVSEK               | 18 | 589,00  | 1763,98 |
| 18937 | IPI00479186 | 38,7 | 38,7 | RFDEILEASDGIMVAR                 | 16 | 607,98  | 1820,91 |
| 21174 | IPI00479186 | 30,6 | 30,6 | EAEAAIYHLQLFEELR                 | 16 | 644,67  | 1930,98 |
| 21322 | IPI00479186 | 99,4 | 99,4 | LAPITSDPTEATAVGAVEASFK           | 22 | 1088,06 | 2174,11 |
| 20352 | IPI00479186 | 70,1 | 70,1 | TATESFASDPILYRPVAVALDTK          | 23 | 822,44  | 2464,28 |



|                   |      |                                |    |        |         |
|-------------------|------|--------------------------------|----|--------|---------|
| 15714 IPI00003865 | 39,9 | 39,9 LLQDFENGK                 | 9  | 541,29 | 1080,56 |
| 16867 IPI00003865 | 56,3 | 56,3 LLQDF(N)GK                | 9  | 541,78 | 1081,54 |
| 15942 IPI00003865 | 95,5 | 95,5 DAGTIAGLNVLR              | 12 | 600,34 | 1198,67 |
| 5482 IPI00003865  | 55,9 | 55,9 VEIANDQGNR                | 11 | 614,82 | 1227,62 |
| 17694 IPI00003865 | 40,2 | 40,2 CNEIINWLDK                | 10 | 652,82 | 1303,62 |
| 9094 IPI00003865  | 57,6 | 57,6 SQIHDIVLVGGSTR            | 14 | 494,61 | 1480,80 |
| 11172 IPI00003865 | 91,8 | 91,8 TTPSYVAFTDTER             | 13 | 744,35 | 1486,69 |
| 18889 IPI00003865 | 77,1 | 77,1 SFYPEEVSSMVLTK            | 14 | 808,90 | 1615,78 |
| 15904 IPI00003865 | 90,3 | 90,3 SFYPEEVSS(M)VLTk          | 14 | 816,90 | 1631,78 |
| 11574 IPI00003865 | 70,8 | 70,8 NQVAMNPTNTVFDK            | 15 | 825,40 | 1648,79 |
| 16907 IPI00003865 | 88,3 | 88,3 IINEPTAAAIA YGLDK         | 16 | 553,97 | 1658,89 |
| 16447 IPI00003865 | 67,5 | 67,5 TVTNAVVTVPAYFNDSQR        | 18 | 991,50 | 1980,99 |
| 24562 IPI00003865 | 48,8 | 48,8 SINPDEAVAYGAAVQAAILSGDK   | 23 | 754,05 | 2259,14 |
| 17917 IPI00003865 | 69,1 | 69,1 GPAVGIDLGTTYSCVGVFQH GK   | 22 | 755,04 | 2262,11 |
| 23822 IPI00007752 | 60,3 | 60,3 (M)SATFIG(N)STAIQELFK     | 17 | 937,96 | 1873,91 |
| 6257 IPI00219018  | 42,6 | 42,6 VGV(N)GFGR                | 8  | 403,71 | 805,41  |
| 4157 IPI00219018  | 51,2 | 51,2 LTG(M)AFR                 | 7  | 406,21 | 810,41  |
| 11757 IPI00219018 | 40   | 40 GALQNIIPASTGAAK             | 15 | 706,40 | 1410,78 |
| 13734 IPI00219018 | 91,8 | 91,8 VPTANVSVVDLTCR            | 14 | 765,90 | 1529,79 |
| 20329 IPI00219018 | 81,1 | 81,1 LVINGNPITIFQER            | 14 | 807,45 | 1612,89 |
| 21027 IPI00219018 | 98,7 | 98,7 LVI(N)GNPITIFQER          | 14 | 807,95 | 1613,88 |
| 21004 IPI00219018 | 88,5 | 88,5 LVING(N)PITIFQER          | 14 | 538,97 | 1613,88 |
| 18604 IPI00219018 | 97,1 | 97,1 LISWYDNEFGYSNR            | 14 | 882,40 | 1762,79 |
| 11484 IPI00219018 | 74,5 | 74,5 IISNASCTT(N)CLAPLAK       | 17 | 917,96 | 1833,90 |
| 15879 IPI00219018 | 29,5 | 29,5 VIISAPSADAP(M)FVMGVNHEK   | 21 | 743,71 | 2228,10 |
| 15879 IPI00219018 | 29,5 | 29,5 VIISAPSADAPMFV(M)GVNHEK   | 21 | 743,71 | 2228,10 |
| 13922 IPI00219018 | 37,7 | 37,7 VIISAPSADAP(M)FV(M)GVNHEK | 21 | 749,04 | 2244,09 |
| 25639 IPI00219018 | 65,4 | 65,4 VIHDNFGIVEGLMTTVHAITATQK  | 24 | 649,59 | 2594,35 |
| 13927 IPI00334775 | 34,6 | 34,6 ALLFIPR                   | 7  | 415,27 | 828,52  |
| 5127 IPI00334775  | 44,5 | 44,5 YESLTDPSK                 | 9  | 520,25 | 1038,49 |

|                   |      |                            |    |        |         |
|-------------------|------|----------------------------|----|--------|---------|
| 16057 IPI00334775 | 74,4 | 74,4 APFDLFENK             | 9  | 540,77 | 1079,53 |
| 11442 IPI00334775 | 56,5 | 56,5 IDIIPNPQER            | 10 | 597,83 | 1193,64 |
| 13679 IPI00334775 | 31,4 | 31,4 RAPFDLFENK            | 10 | 618,82 | 1235,63 |
| 14657 IPI00334775 | 90,8 | 90,8 ADLNNLGTIAK           | 12 | 621,86 | 1241,70 |
| 17127 IPI00334775 | 50,5 | 50,5 ADLI(N)NLGTIAK        | 12 | 622,35 | 1242,68 |
| 13452 IPI00334775 | 71   | 71 SLTNDWEDHLAVK           | 13 | 764,37 | 1526,74 |
| 11734 IPI00334775 | 94,2 | 94,2 HLEINPDHPIVETLR       | 15 | 594,99 | 1781,94 |
| 19482 IPI00334775 | 89,5 | 89,5 HSQFIGYPITLYLEK       | 15 | 603,66 | 1807,95 |
| 9016 IPI00334775  | 34,9 | 34,9 KHLEINPDHPIVETLR      | 16 | 478,52 | 1910,04 |
| 18172 IPI00334775 | 60,1 | 60,1 CLELFSELAEDKENYK      | 16 | 663,32 | 1986,93 |
| 13177 IPI00334775 | 48,8 | 48,8 YHTSQSGDEMTSLSEYVSR   | 19 | 726,32 | 2175,94 |
| 9404 IPI00334775  | 38,3 | 38,3 YHTSQSGDE(M)TSLSEYVSR | 19 | 731,65 | 2191,93 |
| 10439 IPI00003362 | 81,4 | 81,4 DAGTIAGLNV(M)R        | 12 | 617,32 | 1232,62 |
| 20189 IPI00003362 | 50,2 | 50,2 FEELNMDLFR            | 10 | 657,31 | 1312,61 |
| 13674 IPI00003362 | 49,3 | 49,3 NELESYAYSLK           | 11 | 658,82 | 1315,63 |
| 16452 IPI00003362 | 75,5 | 75,5 ELEEIVQPIISK          | 12 | 699,40 | 1396,78 |
| 9251 IPI00003362  | 75   | 75 TWNDPSVQQDIK            | 12 | 715,85 | 1429,68 |
| 17749 IPI00003362 | 36,2 | 36,2 AKFEELNMDLFR          | 12 | 504,92 | 1511,74 |
| 20364 IPI00003362 | 48,1 | 48,1 TFAPEEISAMVLTK        | 14 | 768,90 | 1535,79 |
| 13207 IPI00003362 | 80,5 | 80,5 ITPSYVAFTPEGER        | 14 | 783,89 | 1565,77 |
| 8486 IPI00003362  | 97,8 | 97,8 TKPYIQVDIGGGQTK       | 15 | 802,94 | 1603,86 |
| 11204 IPI00003362 | 50,7 | 50,7 NQLTSNPENTVFDK        | 15 | 839,41 | 1676,80 |
| 12539 IPI00003362 | 89,8 | 89,8 SQIFSTASDNQPTVTIK     | 17 | 918,97 | 1835,93 |
| 12482 IPI00003362 | 62,8 | 62,8 VTHAVVTVPAYFNDAQR     | 17 | 629,99 | 1886,96 |
| 15584 IPI00021428 | 43,7 | 43,7 YPIEHGIITNWDDMEK      | 16 | 654,31 | 1959,90 |
| 13212 IPI00021428 | 64,8 | 64,8 YPIEHGIITNWDD(M)EK    | 16 | 659,64 | 1975,90 |
| 9574 IPI00396485  | 66,4 | 66,4 LPLQDVYK              | 8  | 488,28 | 974,54  |
| 8614 IPI00396485  | 42   | 42 IGGIGTVPVGR             | 11 | 513,31 | 1024,60 |
| 12687 IPI00396485 | 54,3 | 54,3 EHALLAYTLGVK          | 12 | 438,92 | 1313,73 |
| 10707 IPI00396485 | 97,2 | 97,2 YYVTIIDAPGHR          | 12 | 468,91 | 1403,72 |

|                   |      |                                      |    |         |         |
|-------------------|------|--------------------------------------|----|---------|---------|
| 19682 IPI00396485 | 96,7 | 96,7 VETGVLKPGMVVTFAPVNVTTTEVK       | 24 | 839,13  | 2514,38 |
| 27314 IPI00396485 | 34,9 | 34,9 IYLNQLLQEDSLNVADLTSR            | 22 | 844,46  | 2530,37 |
| 17897 IPI00396485 | 88,4 | 88,4 VETGVLKPG(M)VVTFAPVNVTTTEVK     | 24 | 844,46  | 2530,37 |
| 20434 IPI00396485 | 61,3 | 61,3 SGDAAIVDMVPGKP(M)CVESFSDYPPLGR  | 28 | 1004,47 | 3010,39 |
| 24162 IPI00396485 | 93,2 | 93,2 DGNASGTTLLEALDCILPPTRPTDKPLR    | 28 | 1007,86 | 3020,56 |
| 21777 IPI00396485 | 71,9 | 71,9 KDGNASGTTLLEALDCILPPTRPTDKPLR   | 29 | 788,17  | 3148,65 |
| 23114 IPI00396485 | 54,9 | 54,9 KDG(N)ASGTTLLEALDCILPPTRPTDKPLR | 29 | 788,42  | 3149,64 |
| 19292 IPI00387144 | 75,5 | 75,5 EIIDLVLDR                       | 9  | 543,31  | 1084,61 |
| 13787 IPI00387144 | 47,1 | 47,1 QLFHPEQLITGK                    | 12 | 470,93  | 1409,77 |
| 24059 IPI00387144 | 52,3 | 52,3 LISQIVSSITASLR                  | 14 | 496,63  | 1486,87 |
| 20147 IPI00387144 | 96,4 | 96,4 SIQFVDWCPTGFK                   | 13 | 792,88  | 1583,74 |
| 20964 IPI00387144 | 49,5 | 49,5 AVFVDLEPTVIDEVR                 | 15 | 851,46  | 1700,90 |
| 11067 IPI00387144 | 65,8 | 65,8 NLDIERPTYTNLNR                  | 14 | 859,94  | 1717,87 |
| 17794 IPI00387144 | 92,7 | 92,7 IHFPLATYAPVISA EK               | 16 | 878,98  | 1755,95 |
| 15852 IPI00387144 | 75,9 | 75,9 VGINYQPPTVVPGGDLAK              | 18 | 913,00  | 1823,98 |
| 16367 IPI00387144 | 98,7 | 98,7 AYHEQLSVAEITNACFEPANQ(M)VK      | 24 | 922,76  | 2765,27 |
| 9256 IPI00418169  | 38,9 | 38,9 QDIAFAYQR                       | 9  | 556,28  | 1110,54 |
| 13012 IPI00418169 | 88,1 | 88,1 SLYYYIQQDTK                     | 11 | 711,35  | 1420,69 |
| 20217 IPI00418169 | 81,4 | 81,4 SYSPYDMLESIR                    | 12 | 730,84  | 1459,67 |
| 22249 IPI00418169 | 73,4 | 73,4 GVDEVTIVNILTNR                  | 14 | 514,95  | 1541,84 |
| 24387 IPI00418169 | 99,4 | 99,4 SALSGHLETVILGLLK                | 16 | 551,00  | 1649,97 |
| 22662 IPI00418169 | 63,9 | 63,9 GLGTDEDSLIEIICSR                | 16 | 889,44  | 1776,86 |
| 9236 IPI00418169  | 71,9 | 71,9 LSLEGDHSTPPSAYGSVK              | 18 | 615,64  | 1843,89 |
| 15184 IPI00418169 | 48,7 | 48,7 RAEDGSVIDYELIDQDAR              | 18 | 689,00  | 2063,97 |
| 28822 IPI00418169 | 77,6 | 77,6 GDLENAFLNLVQCIQNKPLYFADR        | 24 | 946,81  | 2837,40 |
| 28827 IPI00418169 | 38,6 | 38,6 GDLENAFLNLV(Q)CIQNKPLYFADR      | 24 | 710,61  | 2838,41 |
| 20257 IPI00180675 | 98,9 | 98,9 TIQFVDWCPTGFK                   | 13 | 799,89  | 1597,76 |
| 16167 IPI00419585 | 71,1 | 71,1 VSFELFADK                       | 9  | 528,27  | 1054,53 |
| 13942 IPI00419585 | 68,1 | 68,1 FEDENFILK                       | 9  | 577,79  | 1153,56 |
| 14747 IPI00419585 | 58,2 | 58,2 EGMNIVEAMER                     | 11 | 639,79  | 1277,57 |

|                   |      |                                      |    |         |         |
|-------------------|------|--------------------------------------|----|---------|---------|
| 7916 IPI00419585  | 76,5 | 76,5 EGMNIVEA(M)ER                   | 11 | 647,79  | 1293,57 |
| 10442 IPI00419585 | 71,7 | 71,7 EG(M)NIVEAMER                   | 11 | 647,79  | 1293,57 |
| 5275 IPI00419585  | 63,4 | 63,4 EG(M)NIVEA(M)ER                 | 11 | 655,79  | 1309,56 |
| 16609 IPI00419585 | 32,5 | 32,5 IIPGFMCQGGDFTR                  | 14 | 799,88  | 1597,74 |
| 13902 IPI00419585 | 76,7 | 76,7 IIPGF(M)CQGGDFTR                | 14 | 807,87  | 1613,73 |
| 24472 IPI00419585 | 93,9 | 93,9 VNPTVFFDIAVDGEPLGR              | 18 | 973,51  | 1945,00 |
| 17082 IPI00419585 | 93,3 | 93,3 HTGPGILS(M)ANAGPNT(N)GSQFFICTAK | 27 | 936,77  | 2807,30 |
| 6117 IPI00013508  | 66,3 | 66,3 I(M)SIVDPNR                     | 9  | 530,78  | 1059,54 |
| 22087 IPI00013508 | 73,5 | 73,5 LASDLLEWIR                      | 10 | 608,34  | 1214,67 |
| 10249 IPI00013508 | 33,4 | 33,4 LAILGIHNEVSK                    | 12 | 431,92  | 1292,74 |
| 23497 IPI00013508 | 97,2 | 97,2 VGWEQLLTTIAR                    | 12 | 693,89  | 1385,77 |
| 22012 IPI00013508 | 78,9 | 78,9 GYEEWLLNEIR                     | 11 | 711,36  | 1420,70 |
| 13319 IPI00013508 | 85,3 | 85,3 TINEVENQILTR                    | 12 | 715,39  | 1428,76 |
| 5315 IPI00013508  | 68,8 | 68,8 LSNRPAF(M)PSEGR                 | 13 | 493,25  | 1476,71 |
| 15594 IPI00013508 | 46,2 | 46,2 AGTQIENIEEDFR                   | 13 | 761,36  | 1520,71 |
| 14987 IPI00013508 | 67,8 | 67,8 FAIQDISVEETSAK                  | 14 | 769,39  | 1536,77 |
| 23839 IPI00013508 | 80,6 | 80,6 LLETIDQLYLEYAK                  | 14 | 571,31  | 1710,91 |
| 19444 IPI00013508 | 73,6 | 73,6 MVSDINNAWGCLEQVEK               | 17 | 996,96  | 1991,91 |
| 18354 IPI00013508 | 81,8 | 81,8 (M)VSDINNAWGCLEQVEK             | 17 | 1004,96 | 2007,90 |
| 21289 IPI00013508 | 44,5 | 44,5 IDQLEGDHQLIQEALIFDNK            | 20 | 780,40  | 2338,18 |
| 4236 IPI00220740  | 49,2 | 49,2 GPSSVEDIK                       | 9  | 466,24  | 930,47  |
| 23202 IPI00220740 | 57,6 | 57,6 MTDQEAIQDLWQWR                  | 14 | 910,43  | 1818,84 |
| 21649 IPI00220740 | 85,8 | 85,8 (M)TDQEAIQDLWQWR                | 14 | 918,42  | 1834,83 |
| 20492 IPI00220740 | 91,5 | 91,5 DELHIVEAEAMNYEGSPIK             | 19 | 715,68  | 2144,01 |
| 19222 IPI00220740 | 87   | 87 DELHIVEAEA(M)NYEGSPIK             | 19 | 721,01  | 2160,01 |
| 24004 IPI00220740 | 99,5 | 99,5 MSVQPTVSLGGFEITPPVVLR           | 21 | 1114,11 | 2226,21 |
| 23427 IPI00220740 | 91   | 91 (M)SVQPTVSLGGFEITPPVVLR           | 21 | 1122,11 | 2242,20 |
| 13807 IPI00453473 | 70,3 | 70,3 VFLENVIR                        | 8  | 495,29  | 988,57  |
| 18982 IPI00453473 | 98,1 | 98,1 TVTAMDVVYALK                    | 12 | 655,85  | 1309,69 |
| 15272 IPI00453473 | 99,8 | 99,8 TVTA(M)DVVYALK                  | 12 | 663,85  | 1325,69 |

|       |             |      |      |                                  |    |         |         |
|-------|-------------|------|------|----------------------------------|----|---------|---------|
| 4862  | IPI00396378 | 35,9 | 35,9 | LTDCVV(M)R                       | 8  | 505,24  | 1008,47 |
| 6875  | IPI00396378 | 71,2 | 71,2 | GGNFGFGDSR                       | 10 | 507,23  | 1012,44 |
| 7986  | IPI00396378 | 37,3 | 37,3 | NYYEQWGK                         | 8  | 544,25  | 1086,48 |
| 14834 | IPI00396378 | 71,6 | 71,6 | IDTIEIITDR                       | 10 | 594,83  | 1187,64 |
| 7436  | IPI00396378 | 84,7 | 84,7 | GGGGNFGPGPGSNFR                  | 15 | 689,32  | 1376,62 |
| 17084 | IPI00396378 | 96,7 | 96,7 | GFGFVTFDDHDPVDK                  | 15 | 848,39  | 1694,76 |
| 11377 | IPI00303476 | 56,2 | 56,2 | IGLFGGAGVGK                      | 11 | 488,28  | 974,55  |
| 11032 | IPI00303476 | 54,3 | 54,3 | TIAMDGTEGLVR                     | 12 | 631,82  | 1261,63 |
| 7641  | IPI00303476 | 76,7 | 76,7 | TIA(M)DGTEGLVR                   | 12 | 639,82  | 1277,63 |
| 13184 | IPI00303476 | 45,1 | 45,1 | IMNVIGEPIDER                     | 12 | 693,36  | 1384,70 |
| 10419 | IPI00303476 | 88,3 | 88,3 | I(M)NVIGEPIDER                   | 12 | 701,36  | 1400,70 |
| 15967 | IPI00303476 | 99,6 | 99,6 | FTQAGSEVSALLGR                   | 14 | 718,38  | 1434,75 |
| 25512 | IPI00303476 | 77,8 | 77,8 | TVLIMELI(N)NVAK                  | 13 | 729,92  | 1457,82 |
| 21614 | IPI00303476 | 80,5 | 80,5 | TVLI(M)ELINNVAK                  | 13 | 737,42  | 1472,83 |
| 14822 | IPI00303476 | 93,3 | 93,3 | LVLEVAQHLGESTVR                  | 15 | 550,98  | 1649,91 |
| 10159 | IPI00303476 | 58,6 | 58,6 | I(M)DPNIVGSEHYDVAR               | 16 | 611,29  | 1830,86 |
| 20862 | IPI00303476 | 54,8 | 54,8 | AIAELGIYPAVDPLDSTSR              | 19 | 994,52  | 1987,02 |
| 21302 | IPI00303476 | 65,4 | 65,4 | EGNDLYHEMIESGVINLK               | 18 | 687,67  | 2059,99 |
| 25124 | IPI00303476 | 44,9 | 44,9 | GQQILAGEYDHLPEQAFY(M)VGPIDEEAVAK | 30 | 1122,88 | 3365,62 |
| 17947 | IPI00304925 | 83,9 | 83,9 | DAGVIAGLNVLR                     | 12 | 599,35  | 1196,69 |
| 6302  | IPI00304925 | 40,5 | 40,5 | FGDPVVQSD(M)K                    | 11 | 619,79  | 1237,56 |
| 10079 | IPI00304925 | 34,8 | 34,8 | LVNHFVEEFK                       | 10 | 421,22  | 1260,65 |
| 10186 | IPI00304925 | 99,5 | 99,5 | AQIHDLVLVGGSTR                   | 14 | 733,41  | 1464,81 |
| 12309 | IPI00304925 | 96,3 | 96,3 | NQVALNPQNTVFDK                   | 15 | 829,93  | 1657,84 |
| 11274 | IPI00304925 | 70,4 | 70,4 | HWPFQVINDGDKPK                   | 14 | 560,95  | 1679,84 |
| 17512 | IPI00304925 | 51,3 | 51,3 | IINEPTAAAIA YGLDR                | 16 | 563,31  | 1686,89 |
| 18779 | IPI00304925 | 48,6 | 48,6 | AAAIGIDLGTTYSCVGVFQHGK           | 22 | 755,72  | 2264,13 |
| 22007 | IPI00304925 | 91   | 91   | ELEQVCNPIISGLYQGAGGPGPGGFGAQQPK  | 31 | 1019,17 | 3054,48 |
| 15872 | IPI00021405 | 54,2 | 54,2 | DLEALLNSK                        | 9  | 501,78  | 1001,54 |
| 10892 | IPI00021405 | 85,5 | 85,5 | LADALQELR                        | 9  | 514,79  | 1027,57 |

|                   |      |                                  |    |         |         |
|-------------------|------|----------------------------------|----|---------|---------|
| 9314 IPI00021405  | 76,7 | 76,7 TLEGELHDLR                  | 10 | 591,81  | 1181,60 |
| 6837 IPI00021405  | 83,2 | 83,2 SNEDQS(M)GNWQIK             | 13 | 776,84  | 1551,66 |
| 20022 IPI00021405 | 77,6 | 77,6 AGQVVTIWAAGAGATHSPPTDLVWK   | 25 | 845,11  | 2532,31 |
| 8606 IPI00216691  | 29,2 | 29,2 TLVLL(M)GK                  | 8  | 445,77  | 889,53  |
| 12712 IPI00216691 | 85,4 | 85,4 DSPSVWAAVPGK                | 12 | 607,31  | 1212,61 |
| 9319 IPI00216691  | 62,7 | 62,7 STGGAPTFNVTVTK              | 14 | 690,36  | 1378,71 |
| 15912 IPI00216691 | 96,1 | 96,1 SSFYV(N)GLTLGGQK            | 14 | 736,37  | 1470,73 |
| 21119 IPI00216691 | 97,7 | 97,7 TFDNITPAEVLVVGK             | 16 | 548,65  | 1642,93 |
| 9249 IPI00018534  | 54,6 | 54,6 ESYSVYVYK                   | 9  | 569,28  | 1136,54 |
| 6705 IPI00018534  | 46,2 | 46,2 KESYSVYVYK                  | 10 | 422,55  | 1264,63 |
| 24604 IPI00018534 | 72,6 | 72,6 AMGIMNSFVNDIFER             | 15 | 872,41  | 1742,81 |
| 23197 IPI00018534 | 93,1 | 93,1 A(M)GIMNSFVNDIFER           | 15 | 880,41  | 1758,81 |
| 21594 IPI00018534 | 86,8 | 86,8 AMGI(M)NSFVNDIFER           | 15 | 880,41  | 1758,81 |
| 23969 IPI00018534 | 70,8 | 70,8 A(M)GIMNSFV(N)DIFER         | 15 | 880,90  | 1759,79 |
| 19874 IPI00018534 | 89,8 | 89,8 A(M)GI(M)NSFVNDIFER         | 15 | 888,41  | 1774,80 |
| 12184 IPI00465028 | 29,6 | 29,6 FFVGGNWK                    | 8  | 477,75  | 953,48  |
| 19404 IPI00465028 | 89,9 | 89,9 QSLGELIGTLNAAK              | 14 | 707,90  | 1413,78 |
| 9294 IPI00465028  | 82,8 | 82,8 HVFGESDELIGQK               | 13 | 729,86  | 1457,71 |
| 12169 IPI00465028 | 88,8 | 88,8 DCGATWVVLGHSEK              | 14 | 793,87  | 1585,73 |
| 20067 IPI00465028 | 99,5 | 99,5 VVLAYEPVWAIGTGK             | 15 | 801,95  | 1601,88 |
| 15552 IPI00465028 | 97,9 | 97,9 VT(N)GAFTGEISPGMIK          | 16 | 811,91  | 1621,80 |
| 24912 IPI00465028 | 56   | 56 ELASQPDVDGFLVGGASLKPEFVDIINAK | 29 | 1010,53 | 3028,57 |
| 9306 IPI00019502  | 33,1 | 33,1 VVFQEFR                     | 7  | 462,75  | 923,49  |
| 6827 IPI00019502  | 32   | 32 SGFEPASLK                     | 9  | 468,24  | 934,47  |
| 9554 IPI00019502  | 37   | 37 LVWVPSDK                      | 8  | 472,27  | 942,52  |
| 6987 IPI00019502  | 53,7 | 53,7 LEVNLQA(M)K                 | 9  | 531,29  | 1060,56 |
| 10847 IPI00019502 | 47,9 | 47,9 RGDLPFVVPR                  | 10 | 578,34  | 1154,66 |
| 12607 IPI00019502 | 59,4 | 59,4 ALELDSNLYR                  | 10 | 597,31  | 1192,61 |
| 9981 IPI00019502  | 99,7 | 99,7 VEAQLQELQVK                 | 11 | 642,86  | 1283,71 |
| 11707 IPI00019502 | 42,5 | 42,5 ADFCIIHYAGK                 | 11 | 432,21  | 1293,62 |

|                   |      |                                  |    |         |         |
|-------------------|------|----------------------------------|----|---------|---------|
| 16797 IPI00019502 | 57   | 57 LDPHLVLDQLR                   | 11 | 440,25  | 1317,74 |
| 22559 IPI00019502 | 57,6 | 57,6 VISGVLQLGNIVFK              | 14 | 743,95  | 1485,89 |
| 16844 IPI00019502 | 47,7 | 47,7 VSHLLGINVTDFTTR             | 14 | 524,62  | 1570,85 |
| 7846 IPI00019502  | 44   | 44 YNEQHVPGPSFTAR                | 14 | 534,93  | 1601,76 |
| 21859 IPI00019502 | 85   | 85 QLLQANPILEAFGNAK              | 16 | 863,98  | 1725,94 |
| 15597 IPI00019502 | 91,6 | 91,6 LSFQHDPETSVLVLR             | 15 | 580,98  | 1739,92 |
| 18152 IPI00019502 | 30,5 | 30,5 NLPIYSEEIVE(M)YK            | 14 | 872,43  | 1742,84 |
| 11629 IPI00019502 | 58,4 | 58,4 KQELEEICHDLEAR              | 14 | 590,62  | 1768,84 |
| 15167 IPI00019502 | 69,9 | 69,9 HSQAVEELAEQLEQTK            | 16 | 613,97  | 1838,90 |
| 23609 IPI00019502 | 98   | 98 IIGLDQVAGMSETALPGAFK          | 20 | 1009,53 | 2017,06 |
| 20819 IPI00019502 | 89,7 | 89,7 IIGLDQVAG(M)SETALPGAFK      | 20 | 1017,53 | 2033,05 |
| 20047 IPI00019502 | 46,3 | 46,3 VEDMAELTCLNEASVLHNLK        | 20 | 762,71  | 2285,10 |
| 7117 IPI00794605  | 85,4 | 85,4 YDNEFGYSNR                  | 10 | 632,76  | 1263,51 |
| 3861 IPI00186290  | 29   | 29 TIL(M)(M)GR                   | 7  | 427,22  | 852,42  |
| 8979 IPI00186290  | 57,4 | 57,4 GVQYLNEIK                   | 9  | 532,29  | 1062,57 |
| 10899 IPI00186290 | 85,9 | 85,9 VNFTVDQIR                   | 9  | 546,30  | 1090,58 |
| 13057 IPI00186290 | 38   | 38 VFDAI(M)NFK                   | 9  | 550,78  | 1099,54 |
| 12192 IPI00186290 | 73,5 | 73,5 VFSGLVSTGLK                 | 11 | 554,32  | 1106,63 |
| 10602 IPI00186290 | 59,3 | 59,3 EIGNIISDA(M)K               | 11 | 603,81  | 1205,60 |
| 8799 IPI00186290  | 37,5 | 37,5 EDLYLKPIQR                  | 10 | 637,86  | 1273,70 |
| 9836 IPI00186290  | 74,3 | 74,3 DLEEDHACIPIK                | 12 | 720,34  | 1438,67 |
| 23247 IPI00186290 | 85,6 | 85,6 TFCQLILDPIFK                | 12 | 747,90  | 1493,79 |
| 27622 IPI00186290 | 32   | 32 STAISLFYELSENDLNFIK           | 19 | 735,38  | 2203,11 |
| 25112 IPI00186290 | 76,2 | 76,2 ALLELQLEPEELYQTFQR          | 18 | 740,72  | 2219,15 |
| 27977 IPI00186290 | 94,4 | 94,4 L(M)EPIYLVEIQCPQVVGGIYGVNLR | 26 | 1002,52 | 3004,54 |
| 9656 IPI00218918  | 60,5 | 60,5 TPAQFDADELK                 | 11 | 631,80  | 1261,59 |
| 19937 IPI00218918 | 99,1 | 99,1 GTDVNVFNTILTTR              | 14 | 775,91  | 1549,81 |
| 25262 IPI00218918 | 99,3 | 99,3 ALTGHLEEVVLALLK             | 15 | 535,99  | 1604,95 |
| 24127 IPI00218918 | 76,4 | 76,4 GLGTDEDTLIEILASR            | 16 | 851,95  | 1701,88 |
| 20937 IPI00218918 | 92,4 | 92,4 MYGISLCQAILDETK             | 15 | 871,43  | 1740,84 |

|                   |      |                               |    |        |         |
|-------------------|------|-------------------------------|----|--------|---------|
| 19764 IPI00218918 | 61   | 61 (M)YGISLCQAILDETK          | 15 | 879,43 | 1756,84 |
| 10822 IPI00218918 | 56,2 | 56,2 AAYLQETGKPLDETLK         | 16 | 592,98 | 1775,93 |
| 15522 IPI00218918 | 67,9 | 67,9 GGPGSAVSPYPTFNPSSDVAALHK | 24 | 786,06 | 2355,15 |
| 9579 IPI00215965  | 57,9 | 57,9 DYFEQYGK                 | 8  | 525,23 | 1048,45 |
| 10286 IPI00215965 | 36,7 | 36,7 DYFE(Q)YGK               | 8  | 525,72 | 1049,43 |
| 10286 IPI00215965 | 36,7 | 36,7 DYFEEYGK                 | 8  | 525,72 | 1049,43 |
| 16927 IPI00215965 | 64,6 | 64,6 IEVIEIMTDR               | 10 | 609,82 | 1217,63 |
| 16542 IPI00215965 | 54,2 | 54,2 GFAFVTFDDHDSVDK          | 15 | 567,26 | 1698,75 |
| 21682 IPI00215965 | 91,3 | 91,3 LFIGGLSFETTDESLR         | 16 | 892,96 | 1783,90 |
| 15169 IPI00215965 | 99,5 | 99,5 SHFEQWGTLTDCVV(M)R       | 16 | 661,30 | 1980,88 |
| 12819 IPI00003269 | 99,6 | 99,6 VAPEEHPVLLTEAPLNPK       | 18 | 977,53 | 1953,05 |
| 10947 IPI00003935 | 42,5 | 42,5 ESYSIYVYK                | 9  | 576,28 | 1150,55 |
| 7609 IPI00024067  | 53,1 | 53,1 HELIEFR                  | 7  | 472,25 | 942,49  |
| 9514 IPI00024067  | 32,9 | 32,9 YIEIYVQK                 | 8  | 528,29 | 1054,57 |
| 10376 IPI00024067 | 56,6 | 56,6 HDVVFLITK                | 9  | 536,31 | 1070,61 |
| 9496 IPI00024067  | 46   | 46 VANVELYYR                  | 9  | 563,80 | 1125,58 |
| 14699 IPI00024067 | 39   | 39 EHLELFWSR                  | 9  | 608,81 | 1215,60 |
| 21922 IPI00024067 | 83,6 | 83,6 NLQNLLILTAIK             | 12 | 677,43 | 1352,84 |
| 15549 IPI00024067 | 43,4 | 43,4 ALEHFTDLYDIK             | 12 | 488,92 | 1463,73 |
| 24672 IPI00024067 | 86,7 | 86,7 VGYTPDWIFLLR             | 12 | 740,40 | 1478,79 |
| 18712 IPI00024067 | 48,9 | 48,9 WLLLTGISAQQNR            | 13 | 750,42 | 1498,83 |
| 8174 IPI00024067  | 29,6 | 29,6 HSSLAGCQIINYR            | 13 | 506,92 | 1517,74 |
| 19722 IPI00024067 | 51,7 | 51,7 LTDQLPLIIVCDR            | 13 | 778,43 | 1554,84 |
| 13312 IPI00024067 | 96   | 96 FNALFAQGNYSEAAK            | 15 | 815,90 | 1629,78 |
| 14284 IPI00024067 | 49,4 | 49,4 LHIIEVGTPPTGNQPFPK       | 18 | 649,02 | 1944,04 |
| 27502 IPI00024067 | 50,6 | 50,6 AF(M)TADLPNELIELLEK      | 17 | 982,01 | 1962,00 |
| 15037 IPI00024067 | 60,2 | 60,2 LASTLVHLGEYQAAVDGAR      | 19 | 657,68 | 1970,02 |
| 20167 IPI00024067 | 37,3 | 37,3 KDPELWGSVLLESNPYR        | 17 | 668,35 | 2002,02 |
| 26344 IPI00024067 | 47,6 | 47,6 FDVNTSAVQVLIHIGNLDR      | 20 | 747,39 | 2239,15 |
| 24262 IPI00024067 | 79,8 | 79,8 KFDVNTSAVQVLIHIGNLDR     | 21 | 592,82 | 2367,25 |



|                   |      |                            |    |        |         |
|-------------------|------|----------------------------|----|--------|---------|
| 8364 IPI00291006  | 66,6 | 66,6 ANTFVAELK             | 9  | 496,77 | 991,53  |
| 8399 IPI00291006  | 35,1 | 35,1 EGVVECSFVK            | 10 | 577,28 | 1152,55 |
| 19464 IPI00291006 | 80,9 | 80,9 IFGVTTLDIVR           | 11 | 617,36 | 1232,71 |
| 13507 IPI00291006 | 73,8 | 73,8 GCDVVVIPAGVPR         | 13 | 669,86 | 1337,71 |
| 23487 IPI00291006 | 97,9 | 97,9 VAVLGASGGIGQPLSLLK    | 19 | 897,05 | 1792,08 |
| 19472 IPI00291006 | 98,2 | 98,2 SQETECTYFSTPLLLGK     | 17 | 987,48 | 1972,94 |
| 20732 IPI00291006 | 99   | 99 LTLYDIAHTPGVAADLSHIETK  | 22 | 789,08 | 2364,23 |
| 7287 IPI00440493  | 43,6 | 43,6 LELAQYR               | 7  | 446,75 | 891,48  |
| 11247 IPI00440493 | 37,2 | 37,2 AVDSLVPIGR            | 10 | 513,80 | 1025,59 |
| 14562 IPI00440493 | 57,3 | 57,3 TSIAIDTIINQK          | 12 | 658,87 | 1315,73 |
| 12557 IPI00440493 | 87,8 | 87,8 TGTAEMSSILEER         | 13 | 712,34 | 1422,66 |
| 19869 IPI00440493 | 83,6 | 83,6 FENAFLSHVVSQHQALLGTIR | 21 | 592,57 | 2366,25 |
| 16617 IPI00382470 | 44,8 | 44,8 APFDLFENR             | 9  | 554,77 | 1107,53 |
| 6077 IPI00382470  | 48,6 | 48,6 HIYYITGETK            | 10 | 612,82 | 1223,62 |
| 12702 IPI00382470 | 95   | 95 TLTIVDTGIG(M)TK         | 13 | 683,37 | 1364,72 |
| 12702 IPI00382470 | 95   | 95 TLTLVDTGIG(M)TK         | 13 | 683,37 | 1364,72 |
| 20447 IPI00382470 | 39,2 | 39,2 HSQFIGYPITLFVEK       | 15 | 593,65 | 1777,94 |
| 13602 IPI00382470 | 90,8 | 90,8 HLEINPDHSIETLR        | 15 | 596,32 | 1785,94 |
| 22917 IPI00382470 | 62,5 | 62,5 HGLEVIYMIEPIDEYCVQQLK | 21 | 859,76 | 2576,27 |
| 6862 IPI00007765  | 35,5 | 35,5 LFE(M)AYK             | 7  | 459,23 | 916,44  |
| 14292 IPI00007765 | 80,9 | 80,9 DAGQISGLNVLR          | 12 | 621,84 | 1241,67 |
| 12604 IPI00007765 | 55,7 | 55,7 VQQTVDLDFGR           | 11 | 645,84 | 1289,67 |
| 20302 IPI00007765 | 86,8 | 86,8 AQFEGIVTDLIR          | 12 | 681,37 | 1360,74 |
| 18214 IPI00007765 | 57,8 | 57,8 SDIGEVILVGGMTR        | 14 | 723,88 | 1445,75 |
| 11149 IPI00007765 | 91,6 | 91,6 TTPSVVAFTADGER        | 14 | 725,86 | 1449,71 |
| 7197 IPI00007765  | 92,6 | 92,6 QAVTNPNNTFYATK        | 14 | 784,89 | 1567,76 |
| 21737 IPI00007765 | 36   | 36 LLGQFTLIGIPPAPR         | 15 | 796,98 | 1591,94 |
| 16437 IPI00007765 | 48,7 | 48,7 VINEPTAAALAYGLDK      | 16 | 549,30 | 1644,87 |
| 16122 IPI00007765 | 65,1 | 65,1 NAVITVPAYFNDSQR       | 15 | 847,93 | 1693,84 |
| 12997 IPI00007765 | 35,5 | 35,5 VEAVN(M)AEGIIHDTETK   | 17 | 624,97 | 1871,89 |

|                   |      |                                  |    |         |         |
|-------------------|------|----------------------------------|----|---------|---------|
| 5710 IPI00216457  | 37,9 | 37,9 HLQLAIR                     | 7  | 425,77  | 849,52  |
| 10437 IPI00216457 | 63,6 | 63,6 AGLQFPVGR                   | 9  | 472,77  | 943,52  |
| 23082 IPI00216457 | 94,9 | 94,9 VTIAQGGVLPNIQAVLLPK         | 19 | 644,39  | 1930,16 |
| 5765 IPI00013808  | 75,4 | 75,4 GISQEQ(M)NEFR               | 11 | 677,81  | 1353,60 |
| 5750 IPI00013808  | 89   | 89 GISQEQ(M)QEFR                 | 11 | 684,81  | 1367,61 |
| 22927 IPI00013808 | 77,9 | 77,9 VEQIAAIAQELNELDYYDSHNVNTR   | 25 | 969,14  | 2904,39 |
| 14557 IPI00000874 | 56,4 | 56,4 GLFIIDDK                    | 8  | 460,76  | 919,50  |
| 10094 IPI00000874 | 71,9 | 71,9 TIAQDYGVVK                  | 10 | 554,31  | 1106,60 |
| 7549 IPI00000874  | 47,4 | 47,4 ATAVMPDGQFK                 | 11 | 582,79  | 1163,56 |
| 5365 IPI00000874  | 72,9 | 72,9 ATAV(M)PDGQFK               | 11 | 590,79  | 1179,56 |
| 12327 IPI00000874 | 73,3 | 73,3 LVQAFQFTDK                  | 10 | 598,82  | 1195,62 |
| 11659 IPI00000874 | 58,3 | 58,3 QITVNDLPVGR                 | 11 | 606,34  | 1210,67 |
| 8049 IPI00000874  | 71,5 | 71,5 HGEVCPAGWKPGSDTIKPDVQK      | 22 | 602,30  | 2405,18 |
| 17847 IPI00000874 | 56,5 | 56,5 LNCQVIGASVDSHFCHLAWVNTPK    | 24 | 689,09  | 2752,32 |
| 9739 IPI00018146  | 59,8 | 59,8 NLLSVAYK                    | 8  | 454,27  | 906,52  |
| 14362 IPI00018146 | 42   | 42 (N)LLSVAYK                    | 8  | 454,76  | 907,50  |
| 22272 IPI00018146 | 83,9 | 83,9 DSTLIMQLLR                  | 10 | 595,33  | 1188,65 |
| 20237 IPI00018146 | 87,7 | 87,7 DSTLI(M)QLLR                | 10 | 603,33  | 1204,65 |
| 11827 IPI00018146 | 37,2 | 37,2 KQTIDNSQGAYQEAFDISK         | 19 | 715,01  | 2142,02 |
| 10319 IPI00179964 | 53   | 53 VTNLL(M)LK                    | 8  | 474,28  | 946,55  |
| 15982 IPI00179964 | 99   | 99 LSLDGQNIYNACCTLR              | 16 | 949,45  | 1896,88 |
| 25377 IPI00179964 | 65,6 | 65,6 LPIDVTEGEVISLGLPFGK         | 19 | 662,04  | 1983,09 |
| 23792 IPI00179964 | 49,6 | 49,6 KLPIDVTEGEVISLGLPFGK        | 20 | 704,74  | 2111,19 |
| 22072 IPI00179964 | 95,7 | 95,7 N(N)QFQALLQYADPVSAQHAK      | 20 | 748,71  | 2243,10 |
| 23554 IPI00179964 | 65,5 | 65,5 IAIPGLAGAGNSVLLVSNLNPER     | 23 | 1138,14 | 2274,27 |
| 24272 IPI00179964 | 33,2 | 33,2 IAIPGLAGAG(N)SVLLVSNLNPER   | 23 | 759,43  | 2275,25 |
| 21959 IPI00179964 | 32,9 | 32,9 NFQNIFFPSATLHLSNIPPSVSEEDLK | 27 | 998,84  | 2993,51 |
| 15407 IPI00329801 | 52,5 | 52,5 FITIFGTR                    | 8  | 477,77  | 953,53  |
| 9844 IPI00329801  | 75,6 | 75,6 VLTEIIASR                   | 9  | 501,30  | 1000,59 |
| 25387 IPI00329801 | 84,8 | 84,8 ETSGNLEQLLLAVVK             | 15 | 807,46  | 1612,90 |

|       |             |      |      |                             |    |         |         |
|-------|-------------|------|------|-----------------------------|----|---------|---------|
| 24789 | IPI00329801 | 96,7 | 96,7 | GLGTDEESILTLLTSR            | 16 | 852,95  | 1703,89 |
| 8966  | IPI00220327 | 43,9 | 43,9 | YEELQITAGR                  | 10 | 590,30  | 1178,59 |
| 9304  | IPI00220327 | 78,7 | 78,7 | FLEQQNQVLQTK                | 12 | 738,40  | 1474,78 |
| 17864 | IPI00220327 | 85,8 | 85,8 | SLNNQFASFIDKVR              | 14 | 546,96  | 1637,85 |
| 22737 | IPI00220327 | 81,6 | 81,6 | THNLEPYFESFINNLR            | 16 | 665,33  | 1992,97 |
| 21469 | IPI00220327 | 43,8 | 43,8 | THNLEPYFESFINNLR            | 17 | 538,27  | 2149,07 |
| 20989 | IPI00220327 | 67,2 | 67,2 | FLEQQNQVLQTKWELLQQVDTSTR    | 24 | 978,18  | 2931,51 |
| 5790  | IPI00002966 | 32,9 | 32,9 | QSLT(M)DPVVK                | 10 | 567,30  | 1132,58 |
| 13382 | IPI00002966 | 48   | 48   | AFSDPFVEAEK                 | 11 | 620,30  | 1238,58 |
| 13842 | IPI00002966 | 84   | 84   | VLATAFDTTLGGR               | 13 | 661,36  | 1320,70 |
| 17139 | IPI00002966 | 93,8 | 93,8 | KFDEVLVNHFCEEFGK            | 16 | 666,65  | 1996,93 |
| 23782 | IPI00002966 | 62,5 | 62,5 | TSTVDLPIENQLLWQIDR          | 18 | 1071,06 | 2140,11 |
| 17017 | IPI00002966 | 41,4 | 41,4 | KPVVDCVVSVPFCFYTDAER        | 19 | 747,69  | 2240,06 |
| 13334 | IPI00012011 | 61,2 | 61,2 | AVLFCLSEDK                  | 10 | 591,30  | 1180,58 |
| 9489  | IPI00012011 | 48,3 | 48,3 | AVLFCLSEDKK                 | 11 | 655,34  | 1308,67 |
| 10617 | IPI00012011 | 96,6 | 96,6 | YALYDATYETK                 | 11 | 669,32  | 1336,62 |
| 15082 | IPI00012011 | 70,8 | 70,8 | LGGSAVISLEGKPL              | 14 | 670,89  | 1339,77 |
| 23279 | IPI00012011 | 77,4 | 77,4 | KEDLVFIFWAPESAPLK           | 17 | 995,54  | 1989,06 |
| 11522 | IPI00784347 | 40,8 | 40,8 | DWSHYFK                     | 7  | 491,72  | 981,43  |
| 7864  | IPI00784347 | 67,1 | 67,1 | LEAEIATYR                   | 9  | 533,28  | 1064,55 |
| 5500  | IPI00784347 | 53,6 | 53,6 | VKYETELA(M)R                | 10 | 628,32  | 1254,63 |
| 15667 | IPI00784347 | 67,4 | 67,4 | QAQYEALLNIK                 | 12 | 710,38  | 1418,74 |
| 27247 | IPI00784347 | 63,4 | 63,4 | YALQ(M)EQL(N)GILLHLESELAQTR | 23 | 896,46  | 2686,36 |
| 17409 | IPI00299571 | 61,5 | 61,5 | NSYLEVLLK                   | 9  | 539,81  | 1077,61 |
| 22732 | IPI00299571 | 65,3 | 65,3 | TGEAIVDAALSALR              | 14 | 462,92  | 1385,75 |
| 17152 | IPI00299571 | 94,8 | 94,8 | GSFSEQGINEFLR               | 13 | 742,36  | 1482,71 |
| 17599 | IPI00299571 | 98,6 | 98,6 | LAAVDATVNQVLASR             | 15 | 764,43  | 1526,84 |
| 13757 | IPI00299571 | 67,5 | 67,5 | GSTAPVGGGAFPTIVER           | 17 | 808,43  | 1614,84 |
| 7806  | IPI00169383 | 40,9 | 40,9 | VDFNVP(M)K                  | 8  | 483,24  | 964,47  |
| 14897 | IPI00169383 | 65,1 | 65,1 | YSLEPVAVELK                 | 11 | 624,35  | 1246,68 |

|                   |      |                                           |    |         |         |
|-------------------|------|-------------------------------------------|----|---------|---------|
| 18777 IPI00169383 | 66,1 | 66,1 ITLPVDFVTADK                         | 12 | 659,87  | 1317,72 |
| 12447 IPI00169383 | 46,2 | 46,2 LGDVYVNDAFGTAHR                      | 15 | 545,60  | 1633,78 |
| 12187 IPI00169383 | 47,3 | 47,3 LGDVYV(N)DAFGTAHR                    | 15 | 545,93  | 1634,77 |
| 19699 IPI00169383 | 38,7 | 38,7 ACANPAAGSVILLENLR                    | 17 | 590,32  | 1767,93 |
| 19532 IPI00169383 | 61,8 | 61,8 ALESPERPFLAILGGAK                    | 17 | 590,34  | 1767,99 |
| 17099 IPI00169383 | 65,5 | 65,5 YGPQYGHPPPPPPPEYGPHADSPVL(M)VYGLDQSK | 35 | 950,96  | 3799,79 |
| 6065 IPI00001639  | 37,8 | 37,8 TTLVI(M)ER                           | 8  | 489,77  | 977,52  |
| 19592 IPI00001639 | 71   | 71 SSAYESLMEIVK                           | 12 | 678,84  | 1355,66 |
| 20499 IPI00001639 | 91,7 | 91,7 LAATNALLNSLEFTK                      | 15 | 803,45  | 1604,88 |
| 18189 IPI00001639 | 54,6 | 54,6 Y(M)EAFKPFLGIGLK                     | 14 | 543,96  | 1628,86 |
| 23769 IPI00001639 | 81   | 81 AAVENLPTFLVELSR                        | 15 | 829,96  | 1657,90 |
| 19407 IPI00001639 | 93,3 | 93,3 ESCLEAYTGIVQGLK                      | 15 | 834,42  | 1666,82 |
| 26327 IPI00001639 | 99,9 | 99,9 GALQYLVPILTQTLTK                     | 16 | 587,02  | 1758,03 |
| 22814 IPI00001639 | 39,7 | 39,7 YLEVVLNNTLQQASQAQVDK                 | 19 | 716,38  | 2146,13 |
| 16024 IPI00219217 | 44,3 | 44,3 FIIPQIVK                             | 8  | 479,31  | 956,61  |
| 12652 IPI00219217 | 87,8 | 87,8 SADTLWDIQQ                           | 10 | 588,80  | 1175,58 |
| 5665 IPI00219217  | 61,1 | 61,1 VIGSGCNLDSAR                         | 12 | 624,80  | 1247,59 |
| 13157 IPI00219217 | 64,9 | 64,9 MVVESAYEVIK                          | 11 | 634,33  | 1266,65 |
| 10542 IPI00219217 | 52,8 | 52,8 (M)VVESAYEVIK                        | 11 | 642,33  | 1282,65 |
| 17612 IPI00219217 | 44   | 44 GEMMDLQHGSFLQTPK                       | 17 | 644,65  | 1930,93 |
| 15319 IPI00219217 | 87   | 87 GE(M)MDLQHGSFLQTPK                     | 17 | 649,98  | 1946,92 |
| 4855 IPI00216049  | 38,3 | 38,3 GGDL(M)AYDR                          | 9  | 507,22  | 1012,43 |
| 21172 IPI00216049 | 92,3 | 92,3 IILDISESPIK                          | 12 | 670,90  | 1339,80 |
| 27109 IPI00216049 | 58,8 | 58,8 ILSISADIETIGEILK                     | 16 | 858,00  | 1713,98 |
| 18634 IPI00216049 | 96,9 | 96,9 GSYGDLGGPIITTQVTIPK                  | 19 | 959,02  | 1916,02 |
| 22587 IPI00216049 | 59,2 | 59,2 IITITGTQDQIQNAQYLLQNSVK              | 23 | 863,80  | 2588,38 |
| 24252 IPI00216049 | 44,5 | 44,5 IPTLEEGQLPSPTATSQLPLESDAVECLNYQHYK   | 36 | 1014,51 | 4054,02 |
| 19559 IPI00303882 | 67,2 | 67,2 LGQMVLSGVDTVLGK                      | 15 | 758,92  | 1515,83 |
| 12427 IPI00303882 | 79,9 | 79,9 TLTAAAVSGAQPILSK                     | 16 | 764,44  | 1526,86 |
| 17077 IPI00303882 | 85   | 85 LGQ(M)VLSGVDTVLGK                      | 15 | 766,92  | 1531,83 |

|                   |      |                                           |    |        |         |
|-------------------|------|-------------------------------------------|----|--------|---------|
| 14722 IPI00303882 | 69,9 | 69,9 LEENLPILQQPTEK                       | 14 | 826,45 | 1650,88 |
| 16352 IPI00303882 | 95,4 | 95,4 IATSLDGFVDVASVQQQR                   | 17 | 917,97 | 1833,92 |
| 9716 IPI00554648  | 52,6 | 52,6 WSLLOQQK                             | 8  | 515,79 | 1029,56 |
| 7130 IPI00554648  | 51,8 | 51,8 QLYEEEIR                             | 8  | 540,27 | 1078,53 |
| 11597 IPI00554648 | 72,4 | 72,4 LSELEAALQR                           | 10 | 565,31 | 1128,61 |
| 8579 IPI00554648  | 81,5 | 81,5 YEELQSLAGK                           | 10 | 569,29 | 1136,57 |
| 6012 IPI00554648  | 68   | 68 EYQEL(M)NVK                            | 9  | 585,28 | 1168,54 |
| 4975 IPI00554648  | 51,9 | 51,9 AEAES(M)YQIK                         | 10 | 593,28 | 1184,54 |
| 12834 IPI00554648 | 71,3 | 71,3 TE(M)ENEFVLIK                        | 11 | 684,84 | 1367,66 |
| 20714 IPI00554648 | 80,1 | 80,1 LEGLTDEINFLR                         | 12 | 710,38 | 1418,74 |
| 22344 IPI00554648 | 30,1 | 30,1 LKLEAELGNMQGLVEDFK                   | 18 | 678,69 | 2033,05 |
| 10497 IPI00216592 | 63,7 | 63,7 SDVEAIFSK                            | 9  | 498,26 | 994,50  |
| 7664 IPI00216592  | 50,9 | 50,9 KSDVEAIFSK                           | 10 | 562,30 | 1122,59 |
| 14372 IPI00216592 | 61   | 61 VDSLLENLEK                             | 10 | 580,31 | 1158,61 |
| 16192 IPI00216592 | 81,2 | 81,2 GFAFVQYVNER                          | 11 | 665,33 | 1328,65 |
| 18719 IPI00216592 | 89,8 | 89,8 MIAGQVLDINLAAEPK                     | 16 | 841,96 | 1681,91 |
| 17042 IPI00216592 | 93,7 | 93,7 (M)IAGQVLDINLAAEPK                   | 16 | 849,96 | 1697,90 |
| 28272 IPI00013890 | 46,5 | 46,5 VETELQGVCDTVLGLLDShLIK               | 22 | 813,76 | 2438,27 |
| 12799 IPI00643920 | 38,3 | 38,3 NSTFSEIFK                            | 9  | 536,77 | 1071,52 |
| 13117 IPI00643920 | 70,6 | 70,6 SVPTSTVFYPSDGVATEK                   | 18 | 942,96 | 1883,91 |
| 25739 IPI00643920 | 72   | 72 N(M)AEQIIQEIYSQIQSK                    | 17 | 680,34 | 2038,00 |
| 11519 IPI00643920 | 59,5 | 59,5 LGQSDPAPLQHQMdiyQK                   | 18 | 690,34 | 2068,00 |
| 24442 IPI00643920 | 78,7 | 78,7 SKDDQVTVIGAGVTLHEALAAAELLK           | 26 | 663,12 | 2648,44 |
| 22534 IPI00643920 | 29,2 | 29,2 ILTVEDHYYEGGIGEAVSSAVVGEPGITVTHLAVNR | 36 | 938,98 | 3751,90 |
| 14884 IPI00411633 | 38,5 | 38,5 SLIINTFYsNK                          | 11 | 650,35 | 1298,69 |
| 14239 IPI00465430 | 36,5 | 36,5 ILELDQFK                             | 8  | 503,28 | 1004,55 |
| 13232 IPI00465430 | 66,4 | 66,4 LGSLVDEFK                            | 9  | 504,27 | 1006,53 |
| 8969 IPI00465430  | 32,4 | 32,4 KQELLEALTK                           | 10 | 391,57 | 1171,68 |
| 17719 IPI00465430 | 33,4 | 33,4 KPGGFDISLFYR                         | 12 | 467,25 | 1398,73 |
| 22829 IPI00465430 | 62,4 | 62,4 DTGIFLDLMHLK                         | 12 | 468,25 | 1401,73 |

|                   |      |                            |    |        |         |
|-------------------|------|----------------------------|----|--------|---------|
| 14484 IPI00465430 | 88,9 | 88,9 TFNTSTGGLLLPSDTK      | 16 | 826,43 | 1650,85 |
| 12599 IPI00465430 | 87,8 | 87,8 SDSFENPVLQQHFR        | 14 | 852,41 | 1702,81 |
| 27062 IPI00465430 | 61,6 | 61,6 IQVTPPGFQLVFLPFADDK   | 19 | 711,39 | 2131,14 |
| 6495 IPI00000875  | 34,1 | 34,1 TPEFLR                | 6  | 381,71 | 761,41  |
| 7571 IPI00000875  | 29,9 | 29,9 DPFAHLPK              | 8  | 462,75 | 923,49  |
| 15547 IPI00000875 | 58,6 | 58,6 STFVLDEFK             | 9  | 543,28 | 1084,54 |
| 22274 IPI00000875 | 76,6 | 76,6 ILGLLDAYLK            | 10 | 559,84 | 1117,67 |
| 9036 IPI00000875  | 78,6 | 78,6 ALIAAQYSGAQVR         | 13 | 674,37 | 1346,73 |
| 20709 IPI00000875 | 72,7 | 72,7 DGWSLWYSEYR           | 11 | 731,33 | 1460,64 |
| 17877 IPI00000875 | 29,6 | 29,6 EYFSWEGAFQHVGK        | 14 | 562,26 | 1683,77 |
| 24907 IPI00000875 | 99   | 99 YSNEDTLSVALPYFWEHFDK    | 20 | 821,05 | 2460,13 |
| 9064 IPI00007188  | 61,7 | 61,7 GAWSNVLR              | 8  | 451,75 | 901,48  |
| 17377 IPI00007188 | 73,6 | 73,6 EQGVLSFWR             | 9  | 561,29 | 1120,57 |
| 12844 IPI00007188 | 61,8 | 61,8 AAYFGIYDTAK           | 11 | 610,30 | 1218,59 |
| 17324 IPI00007188 | 97,9 | 97,9 DFLAGGVAAAISK         | 13 | 610,34 | 1218,66 |
| 20802 IPI00007188 | 83,9 | 83,9 YFPTQALNFAFK          | 12 | 723,87 | 1445,73 |
| 17829 IPI00007188 | 79,7 | 79,7 GTDIMYTGTLDCWR        | 14 | 844,87 | 1687,73 |
| 15567 IPI00007188 | 75,7 | 75,7 GTDI(M)YTGTLDLDCWR    | 14 | 852,87 | 1703,73 |
| 17734 IPI00216308 | 90,2 | 90,2 LTLSALIDGK            | 10 | 515,81 | 1029,61 |
| 17734 IPI00216308 | 90,2 | 90,2 LTLSALLDGK            | 10 | 515,81 | 1029,61 |
| 7220 IPI00216308  | 71,7 | 71,7 VTQSNFAVGYK           | 11 | 607,31 | 1212,61 |
| 16044 IPI00216308 | 65,2 | 65,2 WTEYGLTFTEK           | 11 | 687,83 | 1373,65 |
| 12537 IPI00216308 | 62,3 | 62,3 LTFDSSFSPNTGK         | 13 | 700,84 | 1399,66 |
| 12059 IPI00216308 | 92,3 | 92,3 YQIDPDACFSAK          | 12 | 707,82 | 1413,62 |
| 16787 IPI00216308 | 74   | 74 VN(N)SSLIGLGYTQTLKPGIK  | 20 | 702,06 | 2103,16 |
| 18927 IPI00218236 | 59,1 | 59,1 YPENFFLLR             | 9  | 599,82 | 1197,62 |
| 16782 IPI00218236 | 77,1 | 77,1 ICDQWDNLGALTQK        | 14 | 831,40 | 1660,79 |
| 26559 IPI00218236 | 78,6 | 78,6 EIFLSQPILLELEAPLK     | 17 | 977,07 | 1952,12 |
| 16374 IPI00218236 | 53,8 | 53,8 IFCCHGGLSPDLQSMEQIR   | 19 | 750,02 | 2247,02 |
| 12289 IPI00218236 | 87,4 | 87,4 IFCCHGGLSPDLQS(M)EQIR | 19 | 755,35 | 2263,02 |

|       |             |      |      |                                    |    |         |         |
|-------|-------------|------|------|------------------------------------|----|---------|---------|
| 13952 | IPI00397191 | 96,4 | 96,4 | AGPNT(N)GSQFFICTAK                 | 16 | 857,40  | 1712,78 |
| 5055  | IPI00550363 | 36,8 | 36,8 | IQAST(M)AFK                        | 9  | 506,76  | 1011,51 |
| 13484 | IPI00550363 | 52,6 | 52,6 | ENFQNWLK                           | 8  | 539,77  | 1077,52 |
| 6255  | IPI00550363 | 86,4 | 86,4 | NVIGLQ(M)GTNR                      | 11 | 609,82  | 1217,62 |
| 11787 | IPI00550363 | 91   | 91   | TL(M)NLGGLAVAR                     | 12 | 616,34  | 1230,67 |
| 25557 | IPI00550363 | 90,7 | 90,7 | YGINTTDIFQTVDLWEGK                 | 18 | 1050,52 | 2099,02 |
| 12534 | IPI00444262 | 63,6 | 63,6 | GIA YIEFK                          | 8  | 470,76  | 939,51  |
| 9684  | IPI00444262 | 46,4 | 46,4 | SISLYYTGEK                         | 10 | 580,79  | 1159,57 |
| 8324  | IPI00444262 | 72,6 | 72,6 | SIYYITGESK                         | 10 | 580,79  | 1159,58 |
| 10727 | IPI00444262 | 46,4 | 46,4 | EVFEDAAEIR                         | 10 | 589,79  | 1177,56 |
| 16207 | IPI00444262 | 38,8 | 38,8 | KFGYVDFESAEDLEK                    | 15 | 592,95  | 1775,82 |
| 24637 | IPI00444262 | 74,9 | 74,9 | VEGTEPTTAFNLFVGNLNFNK              | 21 | 1156,58 | 2311,15 |
| 9604  | IPI00296337 | 29,1 | 29,1 | FIVCLNK                            | 7  | 447,25  | 892,48  |
| 11242 | IPI00296337 | 40,1 | 40,1 | YAWVLDK                            | 7  | 447,74  | 893,46  |
| 12992 | IPI00296337 | 33,8 | 33,8 | LLEEALLR                           | 8  | 478,79  | 955,57  |
| 19399 | IPI00296337 | 53,9 | 53,9 | IPALDLLIK                          | 9  | 498,33  | 994,64  |
| 5617  | IPI00296337 | 47,5 | 47,5 | FNNYVDC(M)K                        | 9  | 603,75  | 1205,48 |
| 17939 | IPI00296337 | 67,3 | 67,3 | TVVSGLVQFVPK                       | 12 | 637,38  | 1272,74 |
| 9794  | IPI00296337 | 89   | 89   | LNESTFDTQITK                       | 12 | 698,85  | 1395,69 |
| 10922 | IPI00296337 | 73,1 | 73,1 | SQGCSEQVLTVLK                      | 13 | 724,87  | 1447,73 |
| 22679 | IPI00296337 | 80,2 | 80,2 | NILEESLCELVAK                      | 13 | 759,40  | 1516,78 |
| 18434 | IPI00296337 | 41,5 | 41,5 | TVSLLDENNVSSYLSK                   | 16 | 884,95  | 1767,89 |
| 20459 | IPI00296337 | 51,6 | 51,6 | TVGALQVLGTEAQSSLLK                 | 18 | 908,02  | 1814,02 |
| 13789 | IPI00296337 | 35,3 | 35,3 | SLGTIQCCDAIDHLCR                   | 17 | 682,98  | 2045,91 |
| 10472 | IPI00296337 | 36,9 | 36,9 | INQVFHGSCITEGNETK                  | 18 | 683,00  | 2045,98 |
| 17147 | IPI00296337 | 52,3 | 52,3 | FITHAPPGEFNEVFNDVR                 | 18 | 697,01  | 2088,01 |
| 22692 | IPI00296337 | 49,8 | 49,8 | SSFDWLTGSSTDPLVDHTSPSSDSLLFAHK     | 30 | 809,39  | 3233,51 |
| 6815  | IPI00171611 | 46,3 | 46,3 | STELLIR                            | 7  | 416,25  | 830,49  |
| 4890  | IPI00171611 | 33,3 | 33,3 | EIAQDFK                            | 7  | 425,72  | 849,42  |
| 29802 | IPI00171611 | 92,7 | 92,7 | FQSSAV(M)ALQEASEAYLVGLFEDTNLCAIHAK | 32 | 883,18  | 3528,68 |

|       |             |      |      |                                      |    |         |         |
|-------|-------------|------|------|--------------------------------------|----|---------|---------|
| 29854 | IPI00171611 | 33,1 | 33,1 | F(Q)SSAV(M)ALQEASEAYLVGLFEDTNLCAIHAK | 32 | 883,43  | 3529,68 |
| 12082 | IPI00013881 | 75,8 | 75,8 | GLPWSCSADEVQR                        | 13 | 752,85  | 1503,68 |
| 23834 | IPI00013881 | 93,5 | 93,5 | ATENDIYNFFSPLNPVR                    | 17 | 998,99  | 1995,97 |
| 19467 | IPI00028888 | 68,8 | 68,8 | GFGFVLFK                             | 8  | 457,76  | 913,51  |
| 17662 | IPI00028888 | 49,1 | 49,1 | GFCFITFK                             | 8  | 510,25  | 1018,49 |
| 10299 | IPI00028888 | 78,2 | 78,2 | FGEVVDCTIK                           | 10 | 584,29  | 1166,56 |
| 10299 | IPI00028888 | 78,2 | 78,2 | FGEVVDCTLK                           | 10 | 584,29  | 1166,56 |
| 12102 | IPI00219219 | 71   | 71   | SFVLNLGK                             | 8  | 439,26  | 876,51  |
| 9184  | IPI00219219 | 59,6 | 59,6 | LPDGYEFK                             | 8  | 484,74  | 967,46  |
| 10284 | IPI00219219 | 86,5 | 86,5 | DSNNLCLHFNPR                         | 12 | 743,85  | 1485,68 |
| 11589 | IPI00219219 | 67,6 | 67,6 | DS(N)NLCLHFNPR                       | 12 | 744,34  | 1486,66 |
| 15944 | IPI00010896 | 43,1 | 43,1 | GFTIPEAFR                            | 9  | 519,27  | 1036,53 |
| 10777 | IPI00010896 | 77   | 77   | GVTFNVTTVDTK                         | 12 | 641,34  | 1280,66 |
| 22569 | IPI00010896 | 48,7 | 48,7 | IEEFLEAVLCPPR                        | 13 | 524,94  | 1571,80 |
| 19672 | IPI00010896 | 83,4 | 83,4 | LAALNPESNTAGLDIFAK                   | 18 | 922,99  | 1843,97 |
| 21887 | IPI00010896 | 59,7 | 59,7 | FLDGNELTLADCNLLPK                    | 17 | 966,99  | 1931,97 |
| 10904 | IPI00291175 | 34,1 | 34,1 | SLGEISALTSK                          | 11 | 553,31  | 1104,60 |
| 8251  | IPI00291175 | 33,5 | 33,5 | TNLLQVCER                            | 9  | 566,79  | 1131,57 |
| 10196 | IPI00291175 | 65,6 | 65,6 | ALASQLQDSLK                          | 11 | 587,33  | 1172,64 |
| 13162 | IPI00291175 | 56,3 | 56,3 | SLLDASEEAIK                          | 11 | 588,31  | 1174,61 |
| 10071 | IPI00291175 | 48,6 | 48,6 | LLAVAATAPPDAPNR                      | 15 | 738,91  | 1475,81 |
| 15347 | IPI00291175 | 70,9 | 70,9 | WELNSGDGAFYGP                        | 14 | 770,86  | 1539,70 |
| 19664 | IPI00291175 | 65,3 | 65,3 | VLQLTSWDEDWASK                       | 15 | 874,93  | 1747,84 |
| 29002 | IPI00291175 | 78,2 | 78,2 | AIPDLTAPVAQAAVSNLVR                  | 21 | 692,73  | 2075,17 |
| 14737 | IPI00291175 | 62,8 | 62,8 | LLAVAATAPPDAPNREEVFDER               | 22 | 794,41  | 2380,20 |
| 14214 | IPI00010720 | 39,8 | 39,8 | IAILTCPFEPKPK                        | 14 | 537,64  | 1609,89 |
| 23722 | IPI00010720 | 76,5 | 76,5 | LGFAGLVQEISFGTTK                     | 16 | 834,45  | 1666,89 |
| 25162 | IPI00010720 | 79,5 | 79,5 | WVGGPEIELIAIATGGR                    | 17 | 869,98  | 1737,94 |
| 24029 | IPI00010720 | 36,8 | 36,8 | ETGANLAICQWGFDDDEANHLLLQNNLPAVR      | 30 | 1127,22 | 3378,64 |
| 10144 | IPI00008530 | 71,3 | 71,3 | GNVGFVFTK                            | 9  | 484,76  | 967,51  |



|                   |      |                                      |    |        |         |
|-------------------|------|--------------------------------------|----|--------|---------|
| 15602 IPI00008530 | 65,7 | 65,7 IIQLLDDYPK                      | 10 | 609,34 | 1216,67 |
| 20354 IPI00008530 | 92,1 | 92,1 TSFFQALGITTK                    | 12 | 657,36 | 1312,70 |
| 20829 IPI00008530 | 49,9 | 49,9 GTIEILSDVQLIK                   | 13 | 714,92 | 1427,82 |
| 13387 IPI00008530 | 83,6 | 83,6 AGAIAPCEVTVPAQNTGLGPEK          | 22 | 727,37 | 2179,09 |
| 22437 IPI00008530 | 97,7 | 97,7 AFLADPSAFVAAAPVAAATTAAPAAAAAPAK | 31 | 918,16 | 2751,46 |
| 16232 IPI00011274 | 46,9 | 46,9 LAYINPDLALEEK                   | 13 | 744,90 | 1487,79 |
| 14247 IPI00025512 | 37   | 37 GPSWDPFR                          | 8  | 481,23 | 960,44  |
| 17457 IPI00025512 | 98,5 | 98,5 LFDQAFGLPR                      | 10 | 582,31 | 1162,61 |
| 16882 IPI00025512 | 85,3 | 85,3 VSLDVNHFAPELTVK                 | 16 | 595,31 | 1782,91 |
| 17334 IPI00025512 | 73,4 | 73,4 LATQSNEITIPVTFESR               | 17 | 953,50 | 1904,98 |
| 9924 IPI00643041  | 34,8 | 34,8 NLQYYDISAK                      | 10 | 607,81 | 1213,60 |
| 11812 IPI00643041 | 82,8 | 82,8 FNVWDTAGQEK                     | 11 | 647,81 | 1293,60 |
| 13449 IPI00643041 | 48,6 | 48,6 VCENIPIVLCGNK                   | 13 | 758,39 | 1514,76 |
| 20342 IPI00643041 | 94,6 | 94,6 SNYNFEKPFLWLAR                  | 14 | 595,64 | 1783,90 |
| 14867 IPI00643041 | 43,3 | 43,3 YVATLGVEVHPLVFHTNR              | 18 | 513,78 | 2051,09 |
| 4276 IPI00024993  | 30,1 | 30,1 EG(M)TAFVEK                     | 9  | 514,24 | 1026,47 |
| 17627 IPI00009342 | 54,5 | 54,5 SEIDLFNIR                       | 9  | 553,80 | 1105,58 |
| 7329 IPI00009342  | 39,8 | 39,8 LIFQ(M)PQNK                     | 9  | 567,80 | 1133,59 |
| 13869 IPI00009342 | 38,5 | 38,5 FLSAIVSSVDK                     | 11 | 583,33 | 1164,64 |
| 11024 IPI00009342 | 37,4 | 37,4 ALESGDVNTVWK                    | 12 | 659,84 | 1317,66 |
| 14634 IPI00009342 | 53,1 | 53,1 FFQTACDVPELQDK                  | 14 | 849,40 | 1696,78 |
| 16692 IPI00009342 | 80,7 | 80,7 VDQIQEIVTGNPTVIK                | 16 | 877,49 | 1752,96 |
| 11667 IPI00009342 | 34,4 | 34,4 KQELEEICHDLER                   | 14 | 590,62 | 1768,84 |
| 14594 IPI00009342 | 49,6 | 49,6 LPYDVTPEQALAHEEVK               | 17 | 647,00 | 1937,97 |
| 21939 IPI00009342 | 45,1 | 45,1 LEGVLAEVAQHYQDTLIR              | 18 | 685,70 | 2054,08 |
| 21814 IPI00009342 | 31,7 | 31,7 (M)FLGDNAHLSIINEYLSQSYQK        | 22 | 863,09 | 2586,24 |
| 17884 IPI00009342 | 38,5 | 38,5 SPDVGLYGVIEPCGETYHSDLAEAK       | 25 | 903,09 | 2706,25 |
| 20967 IPI00009342 | 47,8 | 47,8 FQPGETLTEILETPATSEQEAEHQR       | 25 | 947,79 | 2840,34 |
| 10349 IPI00604590 | 39   | 39 GLVGEIIK                          | 8  | 414,76 | 827,51  |
| 9879 IPI00604590  | 51,4 | 51,4 GDFCIQVGR                       | 9  | 526,25 | 1050,49 |

|       |             |      |      |                          |    |        |         |
|-------|-------------|------|------|--------------------------|----|--------|---------|
| 13274 | IPI00604590 | 47,8 | 47,8 | DRPFFPGLVK               | 10 | 588,33 | 1174,65 |
| 8636  | IPI00604590 | 40,4 | 40,4 | F(M)QASEDLLK             | 10 | 599,29 | 1196,57 |
| 8729  | IPI00604590 | 34,7 | 34,7 | TFIAIKPDGVQR             | 12 | 672,88 | 1343,75 |
| 8036  | IPI00604590 | 50   | 50   | VMLGETNPADSKPGTIR        | 17 | 595,98 | 1784,91 |
| 7265  | IPI00604590 | 85,6 | 85,6 | V(M)LGETNPADSKPGTIR      | 17 | 601,31 | 1800,90 |
| 22507 | IPI00604590 | 72,9 | 72,9 | EISLWFKPEELVDYK          | 15 | 632,66 | 1894,97 |
| 12912 | IPI00178440 | 73,5 | 73,5 | SIQADGLVWGSSK            | 13 | 674,35 | 1346,68 |
| 19914 | IPI00178440 | 47,5 | 47,5 | SPAGLQVLNDYLADK          | 15 | 802,42 | 1602,83 |
| 17477 | IPI00178440 | 64,9 | 64,9 | SSILLDVKPWDDETD(M)AK     | 18 | 693,67 | 2077,99 |
| 7394  | IPI00022774 | 73,5 | 73,5 | KGDIFLVR                 | 8  | 474,29 | 946,56  |
| 11109 | IPI00022774 | 46,1 | 46,1 | WALSQSNPSALR             | 12 | 665,35 | 1328,68 |
| 23747 | IPI00022774 | 65,8 | 65,8 | IVSQLLTLMDGLK            | 13 | 715,92 | 1429,82 |
| 26912 | IPI00022774 | 64,6 | 64,6 | NAPAIIFIDELDAIAPK        | 17 | 604,34 | 1809,99 |
| 8834  | IPI00011253 | 30,9 | 30,9 | LLGGLAVR                 | 8  | 399,76 | 797,51  |
| 12619 | IPI00011253 | 29,6 | 29,6 | FVADGIFK                 | 8  | 448,75 | 895,48  |
| 12437 | IPI00011253 | 41,1 | 41,1 | GLCAIAQAESLR             | 12 | 644,84 | 1287,66 |
| 17922 | IPI00011253 | 91,3 | 91,3 | FGFPEGSVELYAEK           | 14 | 786,88 | 1571,75 |
| 10191 | IPI00011253 | 52,6 | 52,6 | GGKPEPPAMPQPVPTA         | 16 | 787,40 | 1572,80 |
| 6737  | IPI00011253 | 52,1 | 52,1 | GGKPEPPA(M)PQPVPTA       | 16 | 795,40 | 1588,79 |
| 20589 | IPI00011253 | 44,3 | 44,3 | FVDGLMIHSGDPVNYVDTAVR    | 22 | 823,40 | 2467,19 |
| 19327 | IPI00011253 | 82,7 | 82,7 | FVDGL(M)IHSGDPVNYVDTAVR  | 22 | 828,73 | 2483,18 |
| 12867 | IPI00026154 | 33,7 | 33,7 | ILIEDWK                  | 7  | 458,76 | 915,51  |
| 6035  | IPI00026154 | 62,2 | 62,2 | ESLQQ(M)AEVTR            | 11 | 654,32 | 1306,62 |
| 9959  | IPI00026154 | 85,9 | 85,9 | AQQEQELAADAFK            | 13 | 724,85 | 1447,69 |
| 6502  | IPI00026154 | 90,7 | 90,7 | YEQGTGCWQGPNR            | 13 | 776,83 | 1551,65 |
| 18797 | IPI00026154 | 45,2 | 45,2 | LGGSPSLGTWGSWIGPDHDK     | 21 | 723,35 | 2167,03 |
| 11417 | IPI00376005 | 38,1 | 38,1 | (N)GFVVLK                | 7  | 389,23 | 776,44  |
| 17482 | IPI00376005 | 68,4 | 68,4 | VHLVGIDIFTGK             | 12 | 433,59 | 1297,74 |
| 8311  | IPI00376005 | 74,8 | 74,8 | KYEDICPSTHN(M)DVPNIK     | 18 | 726,34 | 2175,99 |
| 24669 | IPI00376005 | 66,4 | 66,4 | RNDFQLIGIQDGYLSLLQDSGEVR | 24 | 912,80 | 2735,39 |

|                   |      |                                |    |        |         |
|-------------------|------|--------------------------------|----|--------|---------|
| 16269 IPI00420096 | 61   | 61 LTAEDLFEAR                  | 10 | 582,80 | 1163,58 |
| 12129 IPI00420096 | 50,7 | 50,7 LEQLFQDEVAK               | 11 | 660,35 | 1318,68 |
| 15392 IPI00420096 | 57,7 | 57,7 VLALPEPSPAAPTLR           | 15 | 766,45 | 1530,88 |
| 28047 IPI00420096 | 68,8 | 68,8 DGHNLISLLEVLSGDSLPR       | 19 | 679,03 | 2034,08 |
| 22747 IPI00420096 | 46,9 | 46,9 GFFDPNTHENLTYLQLLER       | 19 | 769,72 | 2306,13 |
| 14009 IPI00217966 | 30   | 30 FIIPNVVK                    | 8  | 465,29 | 928,57  |
| 11049 IPI00217966 | 41,8 | 41,8 SADTLWGIQK                | 10 | 559,80 | 1117,58 |
| 18947 IPI00217966 | 78,9 | 78,9 DQLIYNLLK                 | 9  | 560,32 | 1118,63 |
| 10797 IPI00217966 | 29,9 | 29,9 QVVESAYEVIK               | 11 | 632,84 | 1263,67 |
| 11194 IPI00217966 | 30,6 | 30,6 GE(M)(M)DLQHGSFLR         | 14 | 555,93 | 1664,76 |
| 28062 IPI00217966 | 72   | 72 LLIVSNPVDILTYVAWK           | 17 | 972,56 | 1943,11 |
| 14204 IPI00216587 | 71   | 71 NCIVLIDSTPYR                | 12 | 725,87 | 1449,73 |
| 13169 IPI00216587 | 67,4 | 67,4 ISSLLEEQQQGGK             | 13 | 753,89 | 1505,77 |
| 17027 IPI00216587 | 95,7 | 95,7 LDVGNFSWGSECCTR           | 15 | 894,38 | 1786,74 |
| 6212 IPI00017297  | 77,3 | 77,3 SQUAFIE(M)ETR             | 10 | 614,29 | 1226,56 |
| 13547 IPI00017297 | 32,3 | 32,3 LCSLFYTNEEVAK             | 13 | 787,38 | 1572,75 |
| 23882 IPI00017297 | 76,2 | 76,2 ITPENLPQILLQLK            | 14 | 540,66 | 1618,97 |
| 10957 IPI00017297 | 66,8 | 66,8 GPSLNPVLDYDHGSR           | 15 | 542,93 | 1625,78 |
| 20519 IPI00017297 | 71,5 | 71,5 IGPYQPNVPVGDYVIPK         | 18 | 985,04 | 1968,07 |
| 26437 IPI00017297 | 44,9 | 44,9 YQLLQLVEPFGVISNHLILNK     | 21 | 813,46 | 2437,37 |
| 14164 IPI00479217 | 67,6 | 67,6 GYFEYIEENK                | 10 | 646,30 | 1290,58 |
| 13962 IPI00479217 | 97,6 | 97,6 NFILDQTNVSAAAQR           | 15 | 824,43 | 1646,84 |
| 17562 IPI00479217 | 52,4 | 52,4 SSGPTSLFAVTVAPPGAR        | 18 | 857,96 | 1713,90 |
| 22962 IPI00479217 | 84,8 | 84,8 EKPYFPIPEEYTFIQNVPLEDR    | 22 | 908,79 | 2723,35 |
| 8604 IPI00179330  | 54,2 | 54,2 ESTLHLVLR                 | 9  | 534,31 | 1066,61 |
| 6397 IPI00179330  | 32,8 | 32,8 TLDYNIQK                  | 9  | 541,28 | 1080,54 |
| 15702 IPI00179330 | 91,5 | 91,5 TITLEVEPSDTIENVK          | 16 | 894,47 | 1786,92 |
| 10577 IPI00413108 | 42,9 | 42,9 YVDIAIPCNNK               | 11 | 653,83 | 1305,64 |
| 16947 IPI00413108 | 78,9 | 78,9 AIVAIENPADVSVISSR         | 17 | 870,98 | 1739,94 |
| 18107 IPI00413108 | 49,1 | 49,1 FLAAGTHLGGTNLDFQ(M)EQYIYK | 23 | 878,43 | 2632,26 |

|                   |      |                                  |    |         |         |
|-------------------|------|----------------------------------|----|---------|---------|
| 21324 IPI00413108 | 94,5 | 94,5 ADHQPLTEASYVNLPTIALCNTDSPLR | 27 | 999,50  | 2995,47 |
| 7924 IPI00027230  | 41   | 41 SGYLLPDTK                     | 9  | 497,27  | 992,52  |
| 11249 IPI00027230 | 48,5 | 48,5 GLFDEYGSK                   | 9  | 508,24  | 1014,47 |
| 11457 IPI00027230 | 46,2 | 46,2 LSLNIDPDAK                  | 10 | 543,30  | 1084,58 |
| 14024 IPI00027230 | 59,1 | 59,1 SILFVPTSAPR                 | 11 | 594,34  | 1186,67 |
| 22224 IPI00027230 | 51,3 | 51,3 EFEPLLNWMK                  | 10 | 653,83  | 1305,64 |
| 12924 IPI00027230 | 84,2 | 84,2 FQSSHPTDITSLDQYVER          | 19 | 754,03  | 2259,05 |
| 23182 IPI00027230 | 42,9 | 42,9 KGYEVIYLTEPVDEYCIQALPEFDGK  | 26 | 1026,17 | 3075,48 |
| 6267 IPI00009032  | 71,8 | 71,8 GQVLNIQ(M)R                 | 9  | 537,79  | 1073,56 |
| 21312 IPI00009032 | 66,4 | 66,4 ETDLLILFK                   | 9  | 546,32  | 1090,63 |
| 23957 IPI00009032 | 90   | 90 LTTDFNVIVEALSK                | 14 | 775,43  | 1548,84 |
| 7444 IPI00009032  | 47   | 47 SPSKPLPEVTDEYK                | 14 | 530,61  | 1588,80 |
| 20112 IPI00009032 | 61,2 | 61,2 ICHQIEYYFGDFNLPR            | 16 | 691,33  | 2070,96 |
| 12257 IPI00027107 | 40   | 40 FNLILR                        | 6  | 388,24  | 774,48  |
| 9964 IPI00027107  | 54,6 | 54,6 AEAGDNLGALVR                | 12 | 593,31  | 1184,61 |
| 19402 IPI00027107 | 81,5 | 81,5 LLDAVDTYIPVPAR              | 14 | 771,93  | 1541,84 |
| 22164 IPI00027107 | 89,3 | 89,3 GEETPVIVGSALCALEGR          | 18 | 929,47  | 1856,93 |
| 22857 IPI00027107 | 46,4 | 46,4 DLEKPFLLPVEAVYSVPGR         | 19 | 710,39  | 2128,16 |
| 5867 IPI00219525  | 52,9 | 52,9 YGPSL(M)PGGNK               | 11 | 568,77  | 1135,53 |
| 25544 IPI00219525 | 83,4 | 83,4 NPELQNLLLDFFK               | 14 | 853,44  | 1704,87 |
| 18507 IPI00221222 | 96,1 | 96,1 GISLNPEQWSQLK               | 13 | 750,40  | 1498,78 |
| 17207 IPI00024915 | 63,7 | 63,7 VNLAELEFK                   | 8  | 467,27  | 932,53  |
| 13424 IPI00024915 | 41,6 | 41,6 FSMVVQDGIVK                 | 11 | 611,83  | 1221,64 |
| 13977 IPI00024915 | 48,9 | 48,9 THLPGFVEQAEALK              | 14 | 513,94  | 1538,81 |
| 18757 IPI00024915 | 79,2 | 79,2 GVLFGVPGAFTPGCSK            | 16 | 797,41  | 1592,80 |
| 5360 IPI00020984  | 41,4 | 41,4 WEVEE(M)K                   | 7  | 483,72  | 965,42  |
| 15297 IPI00020984 | 80,4 | 80,4 GTLSGWILSK                  | 10 | 531,30  | 1060,59 |
| 11579 IPI00020984 | 94,7 | 94,7 TPELNLDQFHDK                | 12 | 728,86  | 1455,70 |
| 22147 IPI00020984 | 39,3 | 39,3 KIPNPdffEDLEPFR             | 15 | 621,98  | 1862,92 |
| 8304 IPI00030179  | 32,8 | 32,8 VLQLLR                      | 6  | 371,25  | 740,49  |

|                   |      |                                    |    |         |         |
|-------------------|------|------------------------------------|----|---------|---------|
| 13127 IPI00030179 | 80,4 | 80,4 IALTDNALIAR                   | 11 | 585,85  | 1169,68 |
| 8984 IPI00030179  | 34,2 | 34,2 AGNFYVPAEPK                   | 11 | 596,80  | 1191,59 |
| 21854 IPI00030179 | 54,2 | 54,2 YGIIC(M)EDLIHEIYTVGK          | 18 | 724,02  | 2169,05 |
| 7160 IPI00220834  | 36,8 | 36,8 TWTVVDAK                      | 8  | 460,25  | 918,48  |
| 17329 IPI00220834 | 76,8 | 76,8 SQLDIIIHSLK                   | 11 | 422,92  | 1265,73 |
| 24934 IPI00220834 | 76,8 | 76,8 HLMLPDFDLLEDIESK              | 16 | 638,99  | 1913,94 |
| 13832 IPI00023748 | 92,6 | 92,6 SPASDTYIVFGEAK                | 14 | 742,87  | 1483,72 |
| 16759 IPI00023748 | 79,2 | 79,2 NILFVITKPDVYK                 | 13 | 775,45  | 1548,89 |
| 11009 IPI00220301 | 42,9 | 42,9 NFDEILR                       | 7  | 453,74  | 905,46  |
| 13604 IPI00220301 | 38,7 | 38,7 VVVFVGPDK                     | 9  | 504,28  | 1006,55 |
| 17072 IPI00220301 | 61,2 | 61,2 LPFPIIDDR                     | 9  | 543,30  | 1084,59 |
| 23304 IPI00220301 | 49,7 | 49,7 FHDFLGDSWGILFSHPR             | 17 | 508,50  | 2029,98 |
| 16457 IPI00219365 | 53,2 | 53,2 LFFLQVK                       | 7  | 447,78  | 893,54  |
| 18489 IPI00219365 | 71,2 | 71,2 IGFPWSEIR                     | 9  | 552,80  | 1103,58 |
| 15819 IPI00219365 | 78   | 78 APDFVIFYAPR                     | 10 | 591,80  | 1181,59 |
| 24157 IPI00008433 | 99,1 | 99,1 TIAECLADELINA AK              | 15 | 816,42  | 1630,82 |
| 11472 IPI00012503 | 53   | 53 QEILAALEK                       | 9  | 507,80  | 1013,58 |
| 5820 IPI00012503  | 62,1 | 62,1 LGPG(M)ADICK                  | 10 | 539,26  | 1076,50 |
| 21497 IPI00012503 | 48,1 | 48,1 SDVYCEVCEFLVK                 | 13 | 824,37  | 1646,73 |
| 28577 IPI00012503 | 76,2 | 76,2 EIVDSYLPVILDIIK               | 15 | 865,50  | 1728,99 |
| 6160 IPI00453476  | 87,1 | 87,1 HGESAWNLENR                   | 11 | 656,80  | 1311,59 |
| 22439 IPI00453476 | 54,5 | 54,5 ALPFWNEEIVPQIK                | 14 | 842,46  | 1682,90 |
| 14419 IPI00453476 | 43   | 43 YADLTEDQLPSCESLK                | 16 | 934,93  | 1867,85 |
| 26389 IPI00453476 | 33,1 | 33,1 HLEGLSEEAI(M)ELNLPTGIPIVYELDK | 27 | 1013,86 | 3038,55 |
| 6092 IPI00018206  | 69,7 | 69,7 (M)NLGVGAYR                   | 9  | 498,75  | 995,49  |
| 13969 IPI00018206 | 59,7 | 59,7 IAAAILNTPDLR                  | 12 | 634,37  | 1266,73 |
| 13514 IPI00018206 | 64   | 64 FVTVQTISGTGALR                  | 14 | 725,41  | 1448,80 |
| 18372 IPI00018206 | 54,6 | 54,6 ISGETIFVTAPHEATAGIIGVNR       | 23 | 785,09  | 2352,24 |
| 7746 IPI00217466  | 54,7 | 54,7 SGVSLAALK                     | 9  | 423,26  | 844,50  |
| 9849 IPI00217466  | 80,2 | 80,2 ASGPPVSELITK                  | 12 | 599,84  | 1197,66 |

|       |             |      |      |                                      |    |        |         |
|-------|-------------|------|------|--------------------------------------|----|--------|---------|
| 11019 | IPI00641950 | 75,3 | 75,3 | VWQVTIGTR                            | 9  | 530,30 | 1058,59 |
| 12894 | IPI00641950 | 47,2 | 47,2 | LWDLTTGTTTR                          | 11 | 632,83 | 1263,64 |
| 13904 | IPI00641950 | 74,5 | 74,5 | YWLCAATGPSIK                         | 12 | 683,84 | 1365,67 |
| 11144 | IPI00641950 | 77,5 | 77,5 | YTVQDESHSEWVSCVR                     | 16 | 661,29 | 1980,86 |
| 23557 | IPI00641950 | 35,6 | 35,6 | GH(N)GWVTQIATTPQFPDMILSASR           | 24 | 876,77 | 2627,28 |
| 21947 | IPI00641950 | 34,3 | 34,3 | GH(N)GWVTQIATTPQFPD(M)ILSASR         | 24 | 882,10 | 2643,28 |
| 21947 | IPI00641950 | 34,3 | 34,3 | GHNGWVT(Q)IATTPQFPD(M)ILSASR         | 24 | 882,10 | 2643,28 |
| 11227 | IPI00641950 | 37,4 | 37,4 | TNHIGHTGYLNTVTVSPDGSLCASGGK          | 27 | 686,58 | 2742,30 |
| 7354  | IPI00008274 | 29,2 | 29,2 | KEPAVLELEGK                          | 11 | 404,90 | 1211,68 |
| 18267 | IPI00008274 | 85,8 | 85,8 | LSDLLAPISEQIK                        | 13 | 713,91 | 1425,81 |
| 28647 | IPI00008274 | 99,8 | 99,8 | AGAAPYVQAFDSLLAGPVAEYLK              | 23 | 784,41 | 2350,22 |
| 23249 | IPI00646240 | 45,1 | 45,1 | GIMNSFVNDIFER                        | 13 | 771,37 | 1540,73 |
| 19589 | IPI00646240 | 43,5 | 43,5 | GI(M)NSFVNDIFER                      | 13 | 779,37 | 1556,73 |
| 19799 | IPI00646240 | 45   | 45   | (M)GI(M)NSFVNDIFER                   | 14 | 852,89 | 1703,77 |
| 10502 | IPI00005198 | 75,3 | 75,3 | VLQSALAAIR                           | 10 | 521,32 | 1040,63 |
| 10126 | IPI00005198 | 33,4 | 33,4 | KLDPELHLDIK                          | 11 | 440,92 | 1319,74 |
| 19527 | IPI00005198 | 77   | 77   | ILPTLEAVAALGNK                       | 14 | 705,42 | 1408,83 |
| 8426  | IPI00005198 | 52,6 | 52,6 | WFEENASQSTVK                         | 12 | 713,33 | 1424,66 |
| 7267  | IPI00215719 | 82,3 | 82,3 | GCGTVLLSGPR                          | 11 | 558,79 | 1115,58 |
| 19154 | IPI00215719 | 81,5 | 81,5 | ILTFDQLALDSPK                        | 13 | 730,90 | 1459,79 |
| 12152 | IPI00007423 | 31,1 | 31,1 | DISTLEPLK                            | 9  | 508,29 | 1014,56 |
| 12152 | IPI00007423 | 31,1 | 31,1 | DLSTIEPLK                            | 9  | 508,29 | 1014,56 |
| 11779 | IPI00007423 | 65,7 | 65,7 | LPNLTHLNLSGKN                        | 13 | 474,27 | 1419,78 |
| 19567 | IPI00007423 | 90,8 | 90,8 | LLPQLTYLDGYDR                        | 13 | 783,91 | 1565,81 |
| 28517 | IPI00465070 | 75,4 | 75,4 | FQSSAV(M)ALQEACEAYLVGLFEDTNLCAIHAK   | 32 | 901,43 | 3601,68 |
| 28494 | IPI00465070 | 57,2 | 57,2 | FQSSAV(M)AL(Q)EACEAYLVGLFEDTNLCAIHAK | 32 | 901,68 | 3602,68 |
| 17967 | IPI00008529 | 95,4 | 95,4 | NIEDVIAQGIGK                         | 12 | 628,85 | 1255,68 |
| 21009 | IPI00008529 | 32,9 | 32,9 | YVASYLALGGNSSPSAK                    | 19 | 934,99 | 1867,97 |
| 12697 | IPI00008529 | 80   | 80   | LASVPAGGAVAVSAAPGSAAPAAGSAPAAAEK     | 33 | 925,48 | 2773,42 |
| 10697 | IPI00031804 | 82,4 | 82,4 | VCNYGLTFTQK                          | 11 | 665,83 | 1329,64 |

|                   |      |                                                  |    |         |         |
|-------------------|------|--------------------------------------------------|----|---------|---------|
| 18652 IPI00031804 | 61,5 | 61,5 LTLDTIFVPNTGK                               | 13 | 709,90  | 1417,78 |
| 23022 IPI00008527 | 84,2 | 84,2 AAGVNVPEFPWPLFAK                            | 16 | 851,95  | 1701,89 |
| 21412 IPI00008527 | 55,8 | 55,8 ALANVNI GSLICNVGAGGPAPAAGAAPAGGPAPSTAAAPAEK | 43 | 952,99  | 3807,92 |
| 14192 IPI00217468 | 82,5 | 82,5 (N)GLSLAALK                                 | 9  | 444,26  | 886,51  |
| 10301 IPI00217468 | 70,3 | 70,3 ATGPPVSELITK                                | 12 | 606,84  | 1211,67 |
| 11349 IPI00178352 | 95,5 | 95,5 GAGTGGLGLTVEGPCEAK                          | 18 | 837,41  | 1672,81 |
| 17167 IPI00032826 | 75,3 | 75,3 AIDLFTDAIK                                  | 10 | 553,81  | 1105,60 |
| 20367 IPI00032826 | 64,3 | 64,3 APWELLELR                                   | 9  | 563,82  | 1125,62 |
| 16727 IPI00032826 | 95,3 | 95,3 LLGHWEEAAHDLALACK                           | 17 | 484,25  | 1932,95 |
| 12322 IPI00395627 | 64,7 | 64,7 SFDLLVK                                     | 7  | 411,24  | 820,47  |
| 11599 IPI00395627 | 39,5 | 39,5 TDTVLILCR                                   | 9  | 545,80  | 1089,58 |
| 13124 IPI00395627 | 50   | 50 WDYL TQVEK                                    | 9  | 591,29  | 1180,58 |
| 7584 IPI00395627  | 70,2 | 70,2 ISNYGWDQSDK                                 | 11 | 656,79  | 1311,57 |
| 14422 IPI00395627 | 97   | 97 KAELLDNEKPAAVVAPIT TGYTVK                     | 24 | 843,47  | 2527,39 |
| 19454 IPI00297779 | 64,6 | 64,6 SLHDALCVLAQTVK                              | 14 | 518,95  | 1553,82 |
| 19939 IPI00297779 | 40   | 40 LALVTGGEIASTFDHPELVK                          | 20 | 699,71  | 2096,11 |
| 19227 IPI00290770 | 58,5 | 58,5 ELGIWEPLAVK                                 | 11 | 627,86  | 1253,70 |
| 14724 IPI00290770 | 77,3 | 77,3 IPGGHIEDSCVLR                               | 13 | 714,88  | 1427,74 |
| 9851 IPI00023048  | 84,7 | 84,7 IASLEVENQSLR                                | 12 | 679,87  | 1357,72 |
| 18854 IPI00023048 | 80,9 | 80,9 SIQLDGLVWGASK                               | 13 | 687,37  | 1372,73 |
| 13532 IPI00023048 | 54,5 | 54,5 FEEHVQSVDIAAFNK                             | 15 | 578,62  | 1732,84 |
| 8991 IPI00030154  | 51,7 | 51,7 IVVLLQR                                     | 7  | 420,79  | 839,56  |
| 16497 IPI00030154 | 49,3 | 49,3 APLDIPVPDPVK                                | 12 | 630,86  | 1259,71 |
| 16747 IPI00030154 | 37,8 | 37,8 TENLLGSYFPK                                 | 11 | 634,83  | 1267,64 |
| 23812 IPI00030154 | 88,9 | 88,9 NAYAVLYDIILK                                | 12 | 698,40  | 1394,78 |
| 6392 IPI00009790  | 38,6 | 38,6 A(M)EWITAK                                  | 8  | 483,24  | 964,47  |
| 14957 IPI00009790 | 32,6 | 32,6 NVIFQPVAELK                                 | 11 | 629,36  | 1256,71 |
| 21529 IPI00009790 | 40,7 | 40,7 EW SGLLEELAR                                | 11 | 651,84  | 1301,66 |
| 13859 IPI00009790 | 39,5 | 39,5 ELVVTQLGYDTR                                | 12 | 697,37  | 1392,72 |
| 21917 IPI00009790 | 82,3 | 82,3 EIGWTDVGGWTGQGSILGTK                        | 21 | 1060,03 | 2118,04 |

|                   |      |                                      |    |         |         |
|-------------------|------|--------------------------------------|----|---------|---------|
| 9454 IPI00025252  | 44,1 | 44,1 YGVSGYPTLK                      | 10 | 542,79  | 1083,56 |
| 16567 IPI00025252 | 40,4 | 40,4 GFPTIYFSPANK                    | 12 | 671,35  | 1340,68 |
| 22084 IPI00025252 | 83,1 | 83,1 ELSDFISYLQR                     | 11 | 685,85  | 1369,69 |
| 22427 IPI00025252 | 58,9 | 58,9 TFSHELSDFGLESTAGEIPVVAIR        | 24 | 859,11  | 2574,30 |
| 10812 IPI00024145 | 44,1 | 44,1 YQLDPTASISAK                    | 12 | 647,34  | 1292,66 |
| 13779 IPI00024145 | 74,8 | 74,8 LTFDITTFSPNTGK                  | 13 | 714,85  | 1427,69 |
| 14767 IPI00024145 | 36,7 | 36,7 VN(N)SSLIGVGYTQTLRPGVK          | 20 | 702,05  | 2103,13 |
| 20637 IPI00024919 | 63,9 | 63,9 GLFIIDP(N)GVIK                  | 12 | 643,87  | 1285,73 |
| 15227 IPI00024919 | 51,4 | 51,4 AFQYVETHGEVCPANWTPDSPTIKPSPAASK | 31 | 847,16  | 3384,61 |
| 10224 IPI00028091 | 48,4 | 48,4 F(M)EQVIFK                      | 8  | 529,27  | 1056,53 |
| 11524 IPI00028091 | 40,3 | 40,3 YSYVCPDLVK                      | 10 | 622,30  | 1242,59 |
| 10041 IPI00028091 | 50,5 | 50,5 NIVLSGGST(M)FR                  | 12 | 649,33  | 1296,65 |
| 28877 IPI00028091 | 70,4 | 70,4 DITYFIQQLR                      | 11 | 705,39  | 1408,77 |
| 9516 IPI00028091  | 76,4 | 76,4 LPACVVDCGTGYTK                  | 14 | 770,86  | 1539,70 |
| 21587 IPI00028091 | 66   | 66 GVDDLDFFIGDEAIEKPTYATK            | 22 | 815,40  | 2443,18 |
| 22764 IPI00028091 | 53,8 | 53,8 TLTGTVIDSGDGVTHVIPVAEGYVIGSCIK  | 30 | 1020,20 | 3057,57 |
| 7359 IPI00550021  | 83,2 | 83,2 IGQGYLIK                        | 8  | 446,27  | 890,52  |
| 7579 IPI00550021  | 68   | 68 HGSLGFLPR                         | 9  | 492,27  | 982,53  |
| 22499 IPI00550021 | 55   | 55 SINPLGGFVHYGEVTNDFV(M)LK          | 22 | 818,41  | 2452,21 |
| 7182 IPI00015262  | 34,6 | 34,6 GPSYGLSAEVK                     | 11 | 554,29  | 1106,56 |
| 6882 IPI00015262  | 91,4 | 91,4 AGQCVIGLQ(M)GTNK                | 14 | 746,87  | 1491,72 |
| 23704 IPI00015262 | 50,4 | 50,4 TWIEGLTGLSIGPDFQK               | 17 | 931,49  | 1860,96 |
| 18012 IPI00646304 | 69   | 69 VIFGLFGK                          | 8  | 440,77  | 879,52  |
| 16147 IPI00646304 | 53,3 | 53,3 TVDNFVALATGEK                   | 13 | 682,86  | 1363,70 |
| 6195 IPI00025491  | 48,6 | 48,6 VFD(M)LNR                       | 7  | 455,73  | 909,44  |
| 6515 IPI00025491  | 51,3 | 51,3 KVDWLTEK                        | 8  | 509,78  | 1017,55 |
| 15767 IPI00025491 | 93,1 | 93,1 VLITDILLAR                      | 10 | 557,84  | 1113,67 |
| 7789 IPI00025491  | 30,2 | 30,2 ATQALVLAPTR                     | 11 | 570,84  | 1139,67 |
| 8926 IPI00025491  | 48   | 48 LQ(M)EAPHIIVGTPGR                 | 15 | 545,63  | 1633,86 |
| 11802 IPI00025491 | 51,5 | 51,5 GIYAYGFEEKPSAIQQR               | 16 | 609,98  | 1826,93 |



|                   |      |                                              |    |        |         |
|-------------------|------|----------------------------------------------|----|--------|---------|
| 9411 IPI00025849  | 35,5 | 35,5 VSGGLEVLAEK                             | 11 | 551,31 | 1100,61 |
| 6062 IPI00302927  | 63,1 | 63,1 TLSG(M)ESYCVR                           | 11 | 659,79 | 1317,57 |
| 12134 IPI00302927 | 51,4 | 51,4 VIDPATATSVDLR                           | 13 | 679,37 | 1356,72 |
| 24204 IPI00302927 | 98,8 | 98,8 DALSDLALHFLNK                           | 13 | 728,89 | 1455,77 |
| 11544 IPI00302927 | 48,7 | 48,7 ETLLNSATTSLNSK                          | 14 | 739,89 | 1477,76 |
| 9566 IPI00465439  | 63   | 63 PYQYPALTPEQK                              | 12 | 717,87 | 1433,72 |
| 15817 IPI00218733 | 86,9 | 86,9 GDGPVQGIINFEQK                          | 14 | 751,39 | 1500,76 |
| 21279 IPI00218733 | 32,3 | 32,3 HVGDLG(N)VTADKDG VADVSIEDSVISLSGDHCIIGR | 36 | 931,21 | 3720,81 |
| 20082 IPI00553169 | 30,2 | 30,2 VSWGGSIPNSPFR                           | 14 | 751,89 | 1501,77 |
| 18702 IPI00021347 | 58   | 58 IEINFPAEYPFKPPK                           | 15 | 597,32 | 1788,94 |
| 24554 IPI00021347 | 83,3 | 83,3 TDQVIQSLIALVNDPQPEHPLR                  | 22 | 828,45 | 2482,32 |
| 20627 IPI00334587 | 61,2 | 61,2 GFGFILFK                                | 8  | 464,77 | 927,52  |
| 18699 IPI00334587 | 59,8 | 59,8 GFVFITFK                                | 8  | 479,77 | 957,53  |
| 12394 IPI00334587 | 45   | 45 IFVGGLNPEATEEK                            | 14 | 752,39 | 1502,76 |
| 25562 IPI00045109 | 88,8 | 88,8 LLGGVTIAQGGVLPNIQAVLLPK                 | 23 | 757,80 | 2270,37 |
| 17192 IPI00011454 | 39,1 | 39,1 FGAVWTGDNTAEWDHLK                       | 17 | 649,64 | 1945,90 |
| 20824 IPI00011454 | 52   | 52 QYASLTGTQALPPLFSLGYHQSR                   | 23 | 845,77 | 2534,29 |
| 11714 IPI00171903 | 47,7 | 47,7 INEILSNALK                              | 10 | 557,83 | 1113,64 |
| 6752 IPI00171903  | 53,5 | 53,5 (M)GAG(M)GFGLER                         | 11 | 579,26 | 1156,50 |
| 18812 IPI00171903 | 50,4 | 50,4 AFITNIPFDVK                             | 11 | 632,85 | 1263,69 |
| 6217 IPI00171903  | 59,9 | 59,9 (M)GLA(M)GGGGGASFDR                     | 15 | 708,31 | 1414,60 |
| 15724 IPI00171903 | 51,8 | 51,8 LGSTV FVANLDYK                          | 13 | 713,88 | 1425,75 |
| 12484 IPI00171903 | 45,4 | 45,4 GNFGGSFAGSFGGAGGHAPGVAR                 | 23 | 678,99 | 2033,94 |
| 18269 IPI00479366 | 44,1 | 44,1 TSYLTPDLWK                              | 11 | 693,85 | 1385,69 |
| 13402 IPI00479366 | 94,7 | 94,7 SPYQEFTDHLVK                            | 12 | 488,58 | 1462,71 |
| 24282 IPI00479366 | 68,7 | 68,7 SLEEIYLFSLPIK                           | 13 | 776,44 | 1550,86 |
| 16804 IPI00642816 | 91,1 | 91,1 VTDDL VCLVYK                            | 11 | 662,84 | 1323,67 |
| 13172 IPI00642816 | 83,8 | 83,8 PQYQTWEEFSR                             | 11 | 735,84 | 1469,66 |
| 6235 IPI00033494  | 58   | 58 EAFN(M)IDQNR                              | 10 | 627,28 | 1252,55 |
| 14694 IPI00033494 | 52,8 | 52,8 GNFN YIEFTR                             | 10 | 630,80 | 1259,59 |

|                   |      |                                    |    |        |         |
|-------------------|------|------------------------------------|----|--------|---------|
| 22004 IPI00033494 | 91,5 | 91,5 DGFIDKEDLHDMLASLGK            | 18 | 668,66 | 2002,96 |
| 5952 IPI00555610  | 54,4 | 54,4 FS(M)PGFK                     | 7  | 415,20 | 828,38  |
| 15244 IPI00555610 | 43,1 | 43,1 ISMPDVDLHLK                   | 11 | 423,23 | 1266,66 |
| 15822 IPI00555610 | 88   | 88 VNVEAPDVNLEGLGGK                | 16 | 805,92 | 1609,83 |
| 15354 IPI00555610 | 51,9 | 51,9 VSVGAPDLSLEASEGSIK            | 18 | 879,96 | 1757,90 |
| 16062 IPI00555610 | 63,7 | 63,7 VDIDAPDVDVHGPDWHLK            | 18 | 507,75 | 2026,97 |
| 6387 IPI00302925  | 51,1 | 51,1 APGFAQ(M)LK                   | 9  | 489,76 | 977,50  |
| 8809 IPI00302925  | 31,5 | 31,5 LATNAAVTVLR                   | 11 | 564,84 | 1127,67 |
| 16847 IPI00302925 | 69,2 | 69,2 NVGLDIEAEVPAVK                | 14 | 727,40 | 1452,78 |
| 11102 IPI00398135 | 55,3 | 55,3 TGAAPIIDVVR                   | 11 | 556,33 | 1110,64 |
| 12977 IPI00398135 | 58,5 | 58,5 LWTLVSEQTR                    | 10 | 616,84 | 1231,66 |
| 10154 IPI00398135 | 88,2 | 88,2 NQSFCPTVNLDK                  | 12 | 711,84 | 1421,66 |
| 15574 IPI00328319 | 48,7 | 48,7 TVALWDLR                      | 8  | 487,28 | 972,54  |
| 14632 IPI00328319 | 46,8 | 46,8 LNVWDLSK                      | 8  | 487,77 | 973,52  |
| 15777 IPI00328319 | 90,5 | 90,5 TPSSDVLVFDYTK                 | 13 | 736,37 | 1470,72 |
| 29592 IPI00219038 | 92   | 92 FQSAAGALQEASEAYLVGLFEDTNLCAIHAK | 32 | 860,18 | 3436,69 |
| 16309 IPI00032140 | 44,9 | 44,9 DTQSGSLLFIGR                  | 12 | 647,34 | 1292,67 |
| 11339 IPI00032140 | 56,2 | 56,2 HLAGLGLTEAIDK                 | 13 | 669,37 | 1336,73 |
| 19167 IPI00032140 | 49   | 49 LYGSSVSFADDFVR                  | 15 | 830,40 | 1658,79 |
| 17277 IPI00032140 | 94,3 | 94,3 SALQSINWAAQTTDGK              | 17 | 910,44 | 1818,87 |
| 29967 IPI00032140 | 52,8 | 52,8 DQAVENILVSPVVVASSLGLVSLGGK    | 26 | 851,15 | 2550,42 |
| 21459 IPI00026087 | 34,6 | 34,6 DFVAEPMGEKPVGSLAGIGEVLGK      | 24 | 800,75 | 2399,24 |
| 19917 IPI00026087 | 85,3 | 85,3 DFVAEP(M)GEKPVGSLAGIGEVLGK    | 24 | 806,09 | 2415,24 |
| 18912 IPI00645078 | 85   | 85 LAGTQPLEVLEAVQR                 | 15 | 812,46 | 1622,90 |
| 23187 IPI00645078 | 61,7 | 61,7 SLVASLAEPDFVVTDFAK            | 18 | 955,00 | 1907,99 |
| 22504 IPI00645078 | 46,7 | 46,7 AAVATFLQSVQVPEFTPK            | 18 | 967,02 | 1932,03 |
| 19967 IPI00003377 | 95,5 | 95,5 NPPGFAFVEFEDPR                | 14 | 811,39 | 1620,76 |
| 15927 IPI00012074 | 48,8 | 48,8 ENILEEFSK                     | 9  | 554,78 | 1107,54 |
| 5762 IPI00012074  | 33,3 | 33,3 L(M)(M)DPLSGQNR               | 11 | 647,30 | 1292,58 |
| 13987 IPI00012074 | 57,9 | 57,9 GFCFLEYEDHK                   | 11 | 482,21 | 1443,61 |

|                   |      |                                |    |        |         |
|-------------------|------|--------------------------------|----|--------|---------|
| 18842 IPI00012074 | 43,1 | 43,1 VTEGLVDVILYHQPDDK         | 17 | 647,67 | 1939,99 |
| 10867 IPI00376798 | 57,9 | 57,9 YDGILPGK                  | 9  | 488,28 | 974,54  |
| 12352 IPI00022744 | 42,1 | 42,1 IIIPEIQK                  | 8  | 477,30 | 952,60  |
| 12352 IPI00022744 | 42,1 | 42,1 LLIPRWR                   | 7  | 477,30 | 952,60  |
| 12317 IPI00022744 | 45,4 | 45,4 LLLPGELAK                 | 9  | 477,30 | 952,60  |
| 18319 IPI00022744 | 84,5 | 84,5 IPGLLGVFQK                | 10 | 536,33 | 1070,65 |
| 16842 IPI00022744 | 57,8 | 57,8 VSLDVNHFAPDELTVK          | 16 | 595,31 | 1782,91 |
| 29192 IPI00022744 | 49,7 | 49,7 FLESVEGNQNYPLLLLTLLEK     | 21 | 811,78 | 2432,32 |
| 11529 IPI00021828 | 47,3 | 47,3 SQVVAGTNYFIK              | 12 | 663,86 | 1325,70 |
| 9881 IPI00021828  | 70,5 | 70,5 VHVGDDEFVHLR              | 12 | 474,91 | 1421,70 |
| 10969 IPI00021828 | 64,7 | 64,7 VFQSLPHENKPLTLSNYQTNK     | 21 | 820,09 | 2457,26 |
| 14287 IPI00335168 | 66,6 | 66,6 EAFQLFDR                  | 8  | 513,26 | 1024,50 |
| 6532 IPI00335168  | 86,5 | 86,5 ILYSQCGDV(M)R             | 11 | 679,31 | 1356,62 |
| 19927 IPI00010796 | 62,5 | 62,5 ILEFFGLK                  | 8  | 483,79 | 965,56  |
| 12412 IPI00010796 | 35,3 | 35,3 LITTLEEMTK                | 10 | 603,82 | 1205,62 |
| 7776 IPI00010796  | 44,7 | 44,7 LITLLEE(M)TK              | 10 | 611,82 | 1221,62 |
| 8906 IPI00023860  | 33,8 | 33,8 FYEEVHDLER                | 10 | 446,21 | 1335,61 |
| 25437 IPI00023860 | 69,6 | 69,6 GIPEFWLTVFK               | 11 | 668,87 | 1335,72 |
| 17572 IPI00023860 | 56,1 | 56,1 YAVLYQPLFDK               | 11 | 678,86 | 1355,71 |
| 20324 IPI00023860 | 81,6 | 81,6 LDGLVETPTGYIESLPR         | 17 | 930,49 | 1858,97 |
| 20202 IPI00023860 | 39,5 | 39,5 NVDLLSDMVQEHDEPILK        | 18 | 699,02 | 2094,03 |
| 14682 IPI00015029 | 83,3 | 83,3 LTFSCLOGGSDNFK            | 13 | 723,34 | 1444,67 |
| 16587 IPI00015029 | 63,2 | 63,2 HLNEIDLFHCIDPNDSK         | 17 | 689,66 | 2065,95 |
| 11762 IPI00219153 | 62,5 | 62,5 ITVTSEVPFSK               | 11 | 604,33 | 1206,65 |
| 8939 IPI00219153  | 83,9 | 83,9 AGNLGGGVVTIER             | 13 | 621,84 | 1241,67 |
| 10059 IPI00008524 | 59,4 | 59,4 SGVGNIFIK                 | 9  | 467,77 | 933,53  |
| 16144 IPI00008524 | 57,7 | 57,7 GFGVVSFER                 | 9  | 523,26 | 1044,50 |
| 9076 IPI00008524  | 36,5 | 36,5 YQGVNLYVK                 | 9  | 542,30 | 1082,58 |
| 13409 IPI00008524 | 34,3 | 34,3 ALDT(M)NFDVIK             | 11 | 641,82 | 1281,63 |
| 25342 IPI00008524 | 42,5 | 42,5 HLV(M)GDIPAAVNAFQEAASLLGK | 23 | 790,08 | 2367,23 |

|                   |      |                                         |    |         |         |
|-------------------|------|-----------------------------------------|----|---------|---------|
| 8066 IPI00027442  | 79,9 | 79,9 AVYTQDCPLAAAK                      | 13 | 704,35  | 1406,68 |
| 5825 IPI00027442  | 76,5 | 76,5 KAEEIANE(M)IEAAK                   | 14 | 521,60  | 1561,76 |
| 27857 IPI00027442 | 38,4 | 38,4 NVGCLQEALQLATSFAQLR                | 19 | 707,04  | 2118,09 |
| 22262 IPI00013415 | 44,3 | 44,3 AIIIFVPVPQLK                       | 12 | 669,43  | 1336,85 |
| 24862 IPI00013415 | 84,6 | 84,6 TLTA VHDAILEDLVFPSEIVGK            | 22 | 789,77  | 2366,27 |
| 25042 IPI00013415 | 39,1 | 39,1 IVKP(N)GEKPDEFESGISQALLELE(M)NSDLK | 30 | 837,67  | 3346,65 |
| 25042 IPI00013415 | 39,1 | 39,1 IVKPNGEKPDEFESGIS(Q)ALLELE(M)NSDLK | 30 | 837,67  | 3346,65 |
| 16184 IPI00329633 | 73,4 | 73,4 IYGISFPDPK                         | 10 | 568,80  | 1135,59 |
| 13722 IPI00329633 | 94,2 | 94,2 NELSGALTGLTR                       | 12 | 616,34  | 1230,66 |
| 25232 IPI00329633 | 46,2 | 46,2 DQELYFFHELSPGSCFFLPK               | 20 | 821,06  | 2460,15 |
| 11872 IPI00027834 | 87,7 | 87,7 SSSGLLEWESK                        | 11 | 611,80  | 1221,59 |
| 19779 IPI00027834 | 32,6 | 32,6 SDALETLGFLNHYQMK                   | 16 | 622,97  | 1865,90 |
| 18159 IPI00027834 | 38,3 | 38,3 SDALETLGFLNHYQ(M)K                 | 16 | 628,30  | 1881,89 |
| 17039 IPI00219678 | 76,5 | 76,5 LPFPIIDDR                          | 9  | 543,30  | 1084,59 |
| 7298 IPI00219678  | 63,9 | 63,9 GVFNVQ(M)EPK                       | 10 | 582,79  | 1163,56 |
| 5647 IPI00219678  | 43,5 | 43,5 YV(M)TTTTLER                       | 10 | 615,81  | 1229,60 |
| 6995 IPI00219678  | 51,6 | 51,6 RPGYGAYDAFK                        | 11 | 622,81  | 1243,60 |
| 5425 IPI00219678  | 69,3 | 69,3 AGLNCSTEN(M)PIK                    | 13 | 725,84  | 1449,66 |
| 11232 IPI00018465 | 34,8 | 34,8 YNFFTGC PK                         | 9  | 567,26  | 1132,50 |
| 5932 IPI00018465  | 79,5 | 79,5 GGAEQF(M)EETER                     | 12 | 700,29  | 1398,57 |
| 18902 IPI00018465 | 77,7 | 77,7 LPIGDVATQYFADR                     | 14 | 783,40  | 1564,79 |
| 11404 IPI00465260 | 30   | 30 IYIYTLK                              | 7  | 457,27  | 912,53  |
| 11404 IPI00465260 | 30   | 30 IYLYLTK                              | 7  | 457,27  | 912,53  |
| 9139 IPI00465260  | 30,5 | 30,5 NNIIQTWR                           | 8  | 522,78  | 1043,55 |
| 10104 IPI00465260 | 38,5 | 38,5 TVNVVQFEP SK                       | 11 | 624,33  | 1246,66 |
| 23627 IPI00465260 | 77,5 | 77,5 TFFSFPAVVAPFK                      | 13 | 729,40  | 1456,78 |
| 24169 IPI00465260 | 42,5 | 42,5 TLYVEEVV PNVIEPSFGLGR              | 20 | 1109,59 | 2217,16 |
| 26504 IPI00465260 | 30,9 | 30,9 LGDAVEQGVINNTV LGYFIGR             | 21 | 745,73  | 2234,17 |
| 14154 IPI00031522 | 52   | 52 IGGIFAFK                             | 8  | 426,75  | 851,49  |
| 6665 IPI00031522  | 56,3 | 56,3 FGELV(M)TK                         | 8  | 470,74  | 939,47  |

|                   |      |                            |    |         |         |
|-------------------|------|----------------------------|----|---------|---------|
| 6722 IPI00031522  | 57,6 | 57,6 DPGGFYTTR             | 9  | 507,24  | 1012,46 |
| 8784 IPI00031522  | 51,2 | 51,2 FVDLYGAQK             | 9  | 520,77  | 1039,53 |
| 16474 IPI00031522 | 86,1 | 86,1 FGGGNPELLTQMVSK       | 15 | 789,40  | 1576,79 |
| 21784 IPI00031522 | 33,4 | 33,4 TVLGTPEVLLGALPGAGGTQR | 21 | 1004,06 | 2006,11 |
| 24624 IPI00031522 | 52,8 | 52,8 ELHSEFSEVMNEIWASDQIR  | 20 | 807,38  | 2419,11 |
| 14839 IPI00030275 | 47,3 | 47,3 AQLLQPTLEINPR         | 13 | 746,93  | 1491,84 |
| 16034 IPI00030275 | 90,7 | 90,7 GVVDESDIPLNLSR        | 14 | 757,40  | 1512,78 |
| 16034 IPI00030275 | 90,7 | 90,7 GVVDESDLPLNISR        | 14 | 757,40  | 1512,78 |
| 10271 IPI00641829 | 36,4 | 36,4 DVQEIFR               | 7  | 453,74  | 905,46  |
| 9886 IPI00641829  | 33,1 | 33,1 ELAFQISK              | 8  | 468,26  | 934,51  |
| 16149 IPI00641829 | 61,4 | 61,4 ILVATNLFGR            | 10 | 552,33  | 1102,65 |
| 7561 IPI00641829  | 56,4 | 56,4 SFAGNLNTYK            | 10 | 557,78  | 1113,54 |
| 17699 IPI00641829 | 51,4 | 51,4 DFLLKPELLR            | 10 | 415,25  | 1242,73 |
| 14394 IPI00641829 | 37,2 | 37,2 GLAITFVSDENDAK        | 14 | 740,37  | 1478,73 |
| 18102 IPI00641829 | 54,2 | 54,2 VNIAFNVDMPEDSDTYLHR   | 19 | 767,35  | 2299,02 |
| 11502 IPI00479786 | 73,2 | 73,2 IGGGIDVPVPR           | 11 | 540,31  | 1078,61 |
| 17834 IPI00479786 | 44,5 | 44,5 IINDLLQSLR            | 10 | 592,85  | 1183,69 |
| 5727 IPI00479786  | 41,1 | 41,1 SGPPGPPGGPG(M)PPGGR   | 17 | 744,36  | 1486,70 |
| 11879 IPI00479786 | 50,1 | 50,1 LASQGDSISSQLGPIHPPPR  | 20 | 686,36  | 2056,07 |
| 13434 IPI00017334 | 72,4 | 72,4 FDAGELITQR            | 10 | 575,30  | 1148,58 |
| 13069 IPI00017334 | 60,1 | 60,1 DLQNVNITLR            | 10 | 593,33  | 1184,65 |
| 14679 IPI00017334 | 31,1 | 31,1 KLEAAEDIAYQLSR        | 14 | 536,29  | 1605,84 |
| 23482 IPI00017334 | 64,6 | 64,6 NITYLPAGQSVLLQLPQ     | 17 | 928,02  | 1854,02 |
| 6440 IPI00329389  | 55   | 55 HLTDAYFK                | 8  | 497,75  | 993,49  |
| 25977 IPI00329389 | 91,8 | 91,8 ASITPGTILIILTGR       | 15 | 763,47  | 1524,92 |
| 8209 IPI00219757  | 52,8 | 52,8 ASCLYGQLPK            | 10 | 568,79  | 1135,57 |
| 15654 IPI00219757 | 53,7 | 53,7 YISLIYTNYEAGK         | 13 | 767,89  | 1533,77 |
| 19067 IPI00219757 | 64,8 | 64,8 ALPGQLKPFETLLSQNQGGK  | 20 | 709,39  | 2125,15 |
| 17332 IPI00642513 | 66,6 | 66,6 IPDWFLNR              | 8  | 530,78  | 1059,55 |
| 5332 IPI00642513  | 60,5 | 60,5 VITI(M)QNPR           | 9  | 544,30  | 1086,59 |

|       |             |      |      |                             |    |         |         |
|-------|-------------|------|------|-----------------------------|----|---------|---------|
| 12622 | IPI00009904 | 63,5 | 63,5 | FDVSGYPTIK                  | 10 | 563,79  | 1125,57 |
| 19137 | IPI00009904 | 68,9 | 68,9 | VEGFPTIYFAPSGDK             | 15 | 814,40  | 1626,79 |
| 14992 | IPI00642542 | 75,6 | 75,6 | SIGPNFQLGLK                 | 11 | 587,33  | 1172,65 |
| 20137 | IPI00642542 | 76,9 | 76,9 | DGILCELINK                  | 11 | 644,35  | 1286,69 |
| 21667 | IPI00029737 | 58,9 | 58,9 | LSPEPWTPETGLVTDAFK          | 18 | 994,50  | 1986,99 |
| 21919 | IPI00029737 | 82,7 | 82,7 | WFCTGDIGEFHPDGCLQIIDR       | 21 | 846,05  | 2535,13 |
| 12849 | IPI00100160 | 31,6 | 31,6 | NCIGDFLK                    | 8  | 483,74  | 965,46  |
| 13607 | IPI00100160 | 49,3 | 49,3 | ALTLIAGSPLK                 | 11 | 542,34  | 1082,67 |
| 22019 | IPI00100160 | 51,2 | 51,2 | LGTLSALDILIK                | 12 | 628,89  | 1255,77 |
| 26529 | IPI00100160 | 86,4 | 86,4 | ISGSILNELIGLVR              | 14 | 742,45  | 1482,88 |
| 27692 | IPI00100160 | 33   | 33   | LDIFEFLNHVEDGLK             | 15 | 596,98  | 1787,91 |
| 24832 | IPI00215911 | 52   | 52   | QGFCELLQAVPLADSR            | 17 | 924,49  | 1846,96 |
| 20282 | IPI00215911 | 90,4 | 90,4 | LPAELQELPGLSHQYWSAPSDK      | 22 | 822,75  | 2465,22 |
| 18379 | IPI00215777 | 48   | 48   | FGFYEVFK                    | 8  | 518,76  | 1035,51 |
| 7559  | IPI00215777 | 53,6 | 53,6 | LPRPPPPE(M)PESLK            | 14 | 535,29  | 1602,84 |
| 25344 | IPI00215777 | 76,3 | 76,3 | YYALCGFGGVLSCGLTHTAVVPLDLVK | 27 | 970,83  | 2909,48 |
| 12344 | IPI00219155 | 45,2 | 45,2 | YSVDIPLDK                   | 9  | 525,28  | 1048,54 |
| 6045  | IPI00219155 | 89   | 89   | VYNYNHL(M)PTR               | 11 | 475,23  | 1422,67 |
| 11739 | IPI00219155 | 53,9 | 53,9 | NIDDGTSDRPYSHALVAGIDR       | 21 | 758,04  | 2271,08 |
| 21549 | IPI00301311 | 75,2 | 75,2 | IDFYFDENPYFENK              | 14 | 920,91  | 1839,80 |
| 14392 | IPI00301311 | 93,7 | 93,7 | EQQEAIEHIDEVQNEIDR          | 18 | 732,34  | 2194,01 |
| 24482 | IPI00298547 | 77,1 | 77,1 | GLIAAICAGPTALLAHEIGFGSK     | 23 | 756,41  | 2266,22 |
| 18932 | IPI00215914 | 61   | 61   | NISFTVWDVGGQDK              | 14 | 783,38  | 1564,75 |
| 23674 | IPI00215914 | 59,2 | 59,2 | LGEIVTTIPTIGFNVETVEYK       | 21 | 1162,12 | 2322,24 |
| 17604 | IPI00016610 | 45   | 45   | IITLTGPTNAIFK               | 13 | 694,91  | 1387,81 |
| 12202 | IPI00016610 | 44,3 | 44,3 | LVVPATQCGSLIGK              | 14 | 721,90  | 1441,80 |
| 15312 | IPI00016610 | 45,4 | 45,4 | AITIAGVPQSVTECVK            | 16 | 836,95  | 1671,88 |
| 7904  | IPI00221089 | 29,1 | 29,1 | GLSQSALPYR                  | 10 | 546,30  | 1090,58 |
| 16177 | IPI00221089 | 44   | 44   | GLTPSQIGVILR                | 12 | 627,38  | 1252,75 |
| 22364 | IPI00221089 | 69,9 | 69,9 | GLAPDLPEDLYHLIK             | 15 | 847,46  | 1692,91 |

|                   |      |                             |    |         |         |
|-------------------|------|-----------------------------|----|---------|---------|
| 18367 IPI00027252 | 33,4 | 33,4 VLPSIVNEVLK            | 11 | 605,87  | 1209,73 |
| 24997 IPI00027252 | 47,5 | 47,5 IPWFQYPIIYDIR          | 13 | 575,31  | 1722,91 |
| 17617 IPI00027252 | 80,6 | 80,6 IGGVQQDTILAEGLHFR      | 17 | 618,67  | 1852,98 |
| 23917 IPI00029468 | 98   | 98 TLFSNIVLSGGSTLTK         | 16 | 842,47  | 1682,93 |
| 20074 IPI00029468 | 37,6 | 37,6 AQYYLPDGSTIEIGPSR      | 17 | 933,96  | 1865,92 |
| 19707 IPI00029468 | 54,3 | 54,3 DQLQTFSEEHPVLLTEAPLNPR | 22 | 845,43  | 2533,28 |
| 10204 IPI00015361 | 88,8 | 88,8 IQQLTALGAAQATAK        | 15 | 742,93  | 1483,84 |
| 8144 IPI00306960  | 36,5 | 36,5 DVCLYPR                | 7  | 461,73  | 921,44  |
| 14447 IPI00306960 | 37,6 | 37,6 EPFPTIYVDSQK           | 12 | 712,36  | 1422,70 |
| 8244 IPI00306960  | 91,4 | 91,4 YGTCPHGGYGLGLER        | 15 | 546,26  | 1635,74 |
| 17722 IPI00219622 | 81,4 | 81,4 GYSFSLTTFSPSGK         | 14 | 739,86  | 1477,71 |
| 22619 IPI00219622 | 56,7 | 56,7 KLELSDNIISGGLEVLAEK    | 19 | 676,71  | 2027,11 |
| 25999 IPI00219622 | 72,8 | 72,8 YNEDLELEDIAHTAILTK     | 19 | 734,38  | 2200,13 |
| 6187 IPI00216682  | 46,4 | 46,4 G(M)SVYGLGR            | 9  | 478,24  | 954,46  |
| 12872 IPI00478292 | 74,4 | 74,4 DALNIETAIK             | 10 | 544,30  | 1086,59 |
| 19174 IPI00478292 | 53,2 | 53,2 DLIGVQNLLK             | 10 | 556,84  | 1111,66 |
| 17154 IPI00478292 | 45,9 | 45,9 ENLISALEEAK            | 11 | 608,82  | 1215,63 |
| 23712 IPI00478292 | 80,7 | 80,7 IAALQAFADQLIAAGHYAK    | 19 | 658,03  | 1971,06 |
| 11652 IPI00017672 | 40,8 | 40,8 NTAEWLLSHTK            | 11 | 650,34  | 1298,66 |
| 21432 IPI00017672 | 41   | 41 LTQAQIFDYGEIPNFPR        | 17 | 1005,01 | 2008,00 |
| 7434 IPI00031461  | 50,6 | 50,6 VETFSGVYK              | 9  | 515,27  | 1028,52 |
| 21357 IPI00031461 | 50,8 | 50,8 FVSISDLLVPK            | 11 | 609,36  | 1216,71 |
| 28257 IPI00031461 | 31,8 | 31,8 VPSTAEALASSLMGLFEK     | 19 | 660,67  | 1978,99 |
| 19439 IPI00031461 | 94,7 | 94,7 NPYYGGESASITPLEDLYK    | 19 | 1059,01 | 2116,00 |
| 27407 IPI00031461 | 33,5 | 33,5 FDLGQDVIDFTGHALALYR    | 19 | 717,70  | 2150,08 |
| 11114 IPI00007074 | 48,1 | 48,1 SEFVILR                | 7  | 432,25  | 862,49  |
| 7466 IPI00797321  | 47,8 | 47,8 LLADQGGQSWK            | 10 | 573,30  | 1144,59 |
| 14294 IPI00013991 | 68,5 | 68,5 LVILEGELER             | 10 | 585,84  | 1169,66 |
| 12422 IPI00013991 | 55,5 | 55,5 IQLVEEELDR             | 10 | 622,33  | 1242,64 |
| 10432 IPI00289758 | 45,6 | 45,6 SDTFINLR               | 8  | 483,26  | 964,50  |

|                   |      |                                        |    |        |         |
|-------------------|------|----------------------------------------|----|--------|---------|
| 14672 IPI00289758 | 40,3 | 40,3 NPWGEVEWTGR                       | 11 | 665,81 | 1329,61 |
| 6355 IPI00289758  | 90   | 90 (M)PCQLHQVIVAR                      | 12 | 489,92 | 1466,75 |
| 14444 IPI00289758 | 41   | 41 RPTEICADPQFIIGGATR                  | 18 | 668,01 | 2001,01 |
| 17187 IPI00220362 | 37,2 | 37,2 DYFLFR                            | 6  | 430,72 | 859,42  |
| 16467 IPI00220362 | 46,5 | 46,5 FLPLFDR                           | 7  | 454,26 | 906,50  |
| 5370 IPI00220362  | 57,6 | 57,6 GGEIQPVSVK                        | 10 | 507,28 | 1012,55 |
| 9144 IPI00220362  | 41,1 | 41,1 VLLPEYGGTK                        | 10 | 538,80 | 1075,59 |
| 18254 IPI00220362 | 51,9 | 51,9 VVLDDKDYFLFR                      | 12 | 510,60 | 1528,79 |
| 14677 IPI00024933 | 78,8 | 78,8 HPHDIIDDINSGAVECPAS               | 19 | 682,98 | 2045,91 |
| 12952 IPI00022793 | 39,1 | 39,1 TPFLLSGTSYK                       | 11 | 607,33 | 1212,64 |
| 14269 IPI00022793 | 62,3 | 62,3 DQLLLGPTYATPK                     | 13 | 708,89 | 1415,76 |
| 16702 IPI00022793 | 80,1 | 80,1 FNNWGGSLSLGHPFGATGCR              | 20 | 712,33 | 2133,98 |
| 20742 IPI00026302 | 98,5 | 98,5 LYTLVTYVPVTTFK                    | 14 | 822,97 | 1643,92 |
| 15162 IPI00221088 | 59,8 | 59,8 LDYILGLK                          | 8  | 467,78 | 933,55  |
| 18044 IPI00221088 | 34,7 | 34,7 QVVNIPSFIVR                       | 11 | 636,38 | 1270,74 |
| 6370 IPI00019359  | 63,4 | 63,4 IKFE(M)EQNLR                      | 10 | 441,90 | 1322,67 |
| 18334 IPI00019359 | 31,4 | 31,4 GGGGSGFGYSYGGGSGGGFSASSLGGGFGGGSR | 32 | 902,39 | 2704,16 |
| 25442 IPI00019359 | 57,1 | 57,1 NYSPYYNTIDDLKDQIVDLTVGNNK         | 25 | 968,14 | 2901,40 |
| 13727 IPI00742905 | 40   | 40 LGGIGQFLAK                          | 10 | 502,30 | 1002,59 |
| 29939 IPI00742905 | 61,6 | 61,6 ETPFELIEALLK                      | 12 | 701,89 | 1401,77 |
| 5837 IPI00742905  | 32,4 | 32,4 SSVNCPFSSQD(M)K                   | 13 | 751,82 | 1501,62 |
| 12512 IPI00443909 | 83,9 | 83,9 INPDGSQSVVEVPYAR                  | 16 | 865,94 | 1729,86 |
| 10652 IPI00003949 | 37,5 | 37,5 LLAEPVPGIK                        | 10 | 518,82 | 1035,63 |
| 19529 IPI00003949 | 34,8 | 34,8 LELFLPEEYP(M)AAPK                 | 15 | 882,45 | 1762,88 |
| 18697 IPI00003949 | 87,8 | 87,8 YFHVVIAGPQDSPFEGGTFK              | 20 | 732,70 | 2195,07 |
| 24269 IPI00384051 | 81,8 | 81,8 AFYAELYHISSNLEK                   | 16 | 633,33 | 1896,96 |
| 11537 IPI00006052 | 94,5 | 94,5 HALIYDDLK                         | 11 | 644,35 | 1286,69 |
| 13042 IPI00006052 | 74,5 | 74,5 IETLTQQLQAK                       | 12 | 693,40 | 1384,79 |
| 19149 IPI00015953 | 37,3 | 37,3 GVTFLFPIQAK                       | 11 | 610,86 | 1219,70 |
| 17364 IPI00015953 | 58   | 58 EGAFSNFPISEETIK                     | 15 | 834,91 | 1667,80 |



|       |             |      |      |                       |    |        |         |
|-------|-------------|------|------|-----------------------|----|--------|---------|
| 19079 | IPI00015953 | 98,6 | 98,6 | LGVCFDVPTASVTEIQEK    | 18 | 997,00 | 1991,99 |
| 11482 | IPI00012066 | 67,6 | 67,6 | LVVPASQCGSLIGK        | 14 | 714,90 | 1427,78 |
| 10639 | IPI00219029 | 61,6 | 61,6 | IGADFLAR              | 8  | 431,74 | 861,47  |
| 13134 | IPI00219029 | 73,9 | 73,9 | (N)GLSLAALK           | 9  | 444,26 | 886,51  |
| 14764 | IPI00219029 | 41   | 41   | TDDCHPWVLPVVK         | 13 | 522,60 | 1564,77 |
| 23357 | IPI00219029 | 74,6 | 74,6 | IANDNSLNHEYLPILGLAEFR | 21 | 800,42 | 2398,23 |
| 11542 | IPI00215884 | 39,4 | 39,4 | DGTGVVEFVR            | 10 | 539,78 | 1077,55 |
| 20497 | IPI00215884 | 63,8 | 63,8 | GGPPFAFVEFEDPR        | 14 | 782,87 | 1563,73 |
| 22859 | IPI00008438 | 80,4 | 80,4 | IAIYELLFK             | 9  | 555,33 | 1108,65 |
| 10111 | IPI00008438 | 88,3 | 88,3 | AEAGAGSATEFQFR        | 14 | 721,34 | 1440,66 |
| 12669 | IPI00456898 | 75,4 | 75,4 | LGEWVGLCK             | 9  | 531,28 | 1060,54 |
| 6557  | IPI00219097 | 81,9 | 81,9 | LGE(M)WSEQSAK         | 11 | 641,29 | 1280,57 |
| 7334  | IPI00219097 | 52   | 52   | KHPDSSVNFAEFSK        | 14 | 531,59 | 1591,76 |
| 16659 | IPI00017855 | 39,1 | 39,1 | LQLEPFDK              | 9  | 551,81 | 1101,61 |
| 10712 | IPI00017855 | 34,8 | 34,8 | SQFTITPGSEQIR         | 13 | 732,38 | 1462,74 |
| 17342 | IPI00291005 | 75   | 75   | FVEGLPINDFSR          | 12 | 697,36 | 1392,70 |
| 11017 | IPI00291005 | 97,9 | 97,9 | VIVVGNPANTNCLTASK     | 17 | 879,46 | 1756,91 |
| 24039 | IPI00217030 | 41,1 | 41,1 | ECLPLIIFLR            | 10 | 637,37 | 1272,73 |
| 19202 | IPI00031772 | 83,8 | 83,8 | LITINQQWKPIEELQNVQR   | 19 | 784,10 | 2349,28 |
| 17904 | IPI00017617 | 34,7 | 34,7 | DWVLNEFK              | 8  | 525,77 | 1049,52 |
| 11712 | IPI00017617 | 79,9 | 79,9 | APILIATDVASR          | 12 | 613,86 | 1225,70 |
| 12527 | IPI00017617 | 57,8 | 57,8 | TTYLVLDEADR           | 11 | 648,33 | 1294,64 |
| 5782  | IPI00221093 | 42,9 | 42,9 | IAGYVTHL(M)K          | 10 | 574,81 | 1147,61 |
| 16317 | IPI00217975 | 65,2 | 65,2 | IQELEDLLAK            | 10 | 586,33 | 1170,65 |
| 9529  | IPI00299000 | 32,5 | 32,5 | AFFSEVER              | 8  | 492,74 | 983,47  |
| 10119 | IPI00299000 | 48,9 | 48,9 | EGEFVAQFK             | 9  | 527,76 | 1053,51 |
| 13557 | IPI00299000 | 49   | 49   | ITSGPFEPDLYK          | 12 | 683,85 | 1365,68 |
| 7416  | IPI00299000 | 64,8 | 64,8 | LVKPGNQNTQVTEAWNK     | 17 | 643,01 | 1925,99 |
| 19762 | IPI00026202 | 39,2 | 39,2 | FWYFVSQLK             | 9  | 609,32 | 1216,63 |
| 10279 | IPI00026202 | 81,8 | 81,8 | DLTTAGAVTQCYR         | 13 | 728,35 | 1454,68 |

|                   |      |                            |    |         |         |
|-------------------|------|----------------------------|----|---------|---------|
| 6252 IPI00010105  | 80   | 80 LNEAQPSTIATS(M)R        | 14 | 767,88  | 1533,74 |
| 10624 IPI00010105 | 70,6 | 70,6 HGLLVPNNTTDQELQHIR    | 18 | 695,70  | 2084,07 |
| 18014 IPI00009634 | 94,4 | 94,4 YADALQEIIQER          | 12 | 724,87  | 1447,73 |
| 17032 IPI00009634 | 43,8 | 43,8 EGNAIFTFPNTPVK        | 14 | 767,90  | 1533,78 |
| 10364 IPI00472943 | 45,3 | 45,3 WAAVVVPSGQEQR         | 13 | 713,87  | 1425,74 |
| 11002 IPI00472943 | 44,9 | 44,9 WAAVVVPSG(Q)EQR       | 13 | 714,37  | 1426,72 |
| 11002 IPI00472943 | 44,9 | 44,9 WAAVVVPSGQE(Q)R       | 13 | 714,37  | 1426,72 |
| 17674 IPI00472943 | 92,6 | 92,6 APWIEQEGPEYWDR        | 14 | 888,40  | 1774,79 |
| 15324 IPI00216256 | 37,8 | 37,8 LYSILGTTLK            | 10 | 554,83  | 1107,65 |
| 13457 IPI00465361 | 59,6 | 59,6 GFSLEELR              | 8  | 475,75  | 949,49  |
| 9899 IPI00465361  | 61,4 | 61,4 LATQLTGPV(M)PVR       | 13 | 699,89  | 1397,77 |
| 12514 IPI00013894 | 43,2 | 43,2 AAALFLNR              | 9  | 502,78  | 1003,54 |
| 5242 IPI00013894  | 31,7 | 31,7 LILEQ(M)QK            | 8  | 509,78  | 1017,55 |
| 22809 IPI00013894 | 97   | 97 ALSVGNIDDALQCYSEAIK     | 19 | 1034,01 | 2066,00 |
| 25032 IPI00015148 | 80,6 | 80,6 INVNEIFYDLVR          | 12 | 747,90  | 1493,79 |
| 10769 IPI00293665 | 46,8 | 46,8 WTLLQEQGTK            | 10 | 602,32  | 1202,63 |
| 6542 IPI00299573  | 37,9 | 37,9 KVVNPLFEK             | 9  | 537,32  | 1072,63 |
| 13614 IPI00396435 | 58,4 | 58,4 VESLLVTAISK           | 11 | 580,35  | 1158,69 |
| 11352 IPI00396435 | 45,6 | 45,6 YGVIILDEAHER          | 12 | 472,25  | 1413,72 |
| 7152 IPI00396435  | 33,1 | 33,1 HQSFVLVGETGSGK        | 14 | 482,58  | 1444,73 |
| 14124 IPI00396435 | 68,7 | 68,7 GGSTTGSQFLEQFK        | 14 | 743,86  | 1485,71 |
| 17254 IPI00396435 | 97,8 | 97,8 IQYQLVDISQDNALR       | 15 | 888,47  | 1774,92 |
| 13429 IPI00298994 | 52   | 52 NLGTALAEER              | 10 | 529,30  | 1056,59 |
| 6957 IPI00298994  | 41,4 | 41,4 AA(M)EPIVISAK         | 11 | 573,32  | 1144,62 |
| 25244 IPI00298994 | 48,4 | 48,4 SANLVAATLGAILNR       | 15 | 495,29  | 1482,85 |
| 10356 IPI00298994 | 52,2 | 52,2 IGITNHDEYSLVR         | 13 | 506,26  | 1515,77 |
| 27342 IPI00298994 | 52,7 | 52,7 GVGAAATAVTQALNELLQHVK | 21 | 697,72  | 2090,15 |
| 21199 IPI00014230 | 30,6 | 30,6 AFVDFLSDEIK           | 11 | 642,33  | 1282,64 |
| 11039 IPI00014230 | 90,6 | 90,6 EVSFQSTGESEWK         | 13 | 757,34  | 1512,67 |
| 20294 IPI00014230 | 56,3 | 56,3 AFVDFLSDEIKEER        | 14 | 566,62  | 1696,83 |

|                   |      |                                 |    |        |         |
|-------------------|------|---------------------------------|----|--------|---------|
| 7944 IPI00027626  | 36,3 | 36,3 IITEGFEEAAK                | 10 | 539,79 | 1077,57 |
| 16754 IPI00027626 | 82   | 82 VLAQNSGFIDLQETLVK            | 16 | 881,47 | 1760,93 |
| 12474 IPI00061178 | 93,8 | 93,8 LFIGGLNTETNEK              | 13 | 718,37 | 1434,73 |
| 18562 IPI00061178 | 49,9 | 49,9 GFAFVTFESPADAK             | 14 | 743,86 | 1485,71 |
| 14522 IPI00061178 | 57,4 | 57,4 LVEALCAEHQINLIK            | 15 | 584,32 | 1749,94 |
| 7384 IPI00000105  | 43,8 | 43,8 VPHNAAVQVYDYR              | 13 | 511,26 | 1530,76 |
| 13369 IPI00216694 | 55,9 | 55,9 NEALAALLR                  | 9  | 485,79 | 969,56  |
| 5640 IPI00216694  | 31,2 | 31,2 EAN(M)PLPGYK               | 10 | 568,28 | 1134,54 |
| 19757 IPI00216694 | 39,1 | 39,1 YPALTKEPENQDIDWTLLEGETR    | 22 | 863,77 | 2588,28 |
| 12154 IPI00216694 | 64,4 | 64,4 EGICALGGTSELSSEGTQHSYSEEEK | 26 | 929,07 | 2784,20 |
| 20619 IPI00291922 | 71,4 | 71,4 LFQVEYAIEAIK               | 12 | 712,39 | 1422,78 |
| 10166 IPI00291922 | 46   | 46 ITSPL(M)EPSSIEK              | 13 | 724,37 | 1446,73 |
| 9559 IPI00291922  | 45,3 | 45,3 AIGSASEGAQSSLQEYVYHK       | 19 | 654,66 | 1960,95 |
| 16442 IPI00291922 | 39,8 | 39,8 GPQLFHMDPSGTFVQCDAR        | 19 | 721,66 | 2161,97 |
| 17164 IPI00027285 | 75   | 75 VLGLVLLR                     | 8  | 441,81 | 881,61  |
| 7210 IPI00002821  | 39,3 | 39,3 VAYVSFGPHAGK               | 12 | 411,55 | 1231,63 |
| 6855 IPI00419880  | 62,7 | 62,7 TTDGYLLR                   | 8  | 469,75 | 937,49  |
| 12232 IPI00419880 | 36,9 | 36,9 LFCVGFTK                   | 8  | 486,25 | 970,49  |
| 12587 IPI00419880 | 40,6 | 40,6 NCLTNFHGMDLTR              | 13 | 526,91 | 1577,71 |
| 9296 IPI00005159  | 30,9 | 30,9 ILLTEPP(M)NPTK             | 12 | 685,37 | 1368,73 |
| 11859 IPI00005159 | 83,9 | 83,9 LCYVGYNIEQEYK              | 13 | 822,39 | 1642,76 |
| 20092 IPI00181306 | 83,4 | 83,4 IDLAVLLGK                  | 9  | 471,31 | 940,60  |
| 11677 IPI00001734 | 54,4 | 54,4 FGVIFAGAQQK                | 10 | 519,29 | 1036,57 |
| 12197 IPI00001734 | 35,5 | 35,5 ELLAVPDNYK                 | 10 | 581,31 | 1160,61 |
| 22744 IPI00001734 | 34,9 | 34,9 SQTIEIIDNSQGFYVCPVEPQNR    | 24 | 953,12 | 2856,34 |
| 21517 IPI00025273 | 63,7 | 63,7 FGDPECQVILPLLK             | 14 | 814,94 | 1627,86 |
| 15249 IPI00025273 | 38,2 | 38,2 ISNTAISISDHTALAQFCK        | 19 | 693,02 | 2076,03 |
| 23409 IPI00025273 | 47,1 | 47,1 AFTKPEEACSFILSADFPALVVK    | 23 | 847,44 | 2539,31 |
| 15017 IPI00075248 | 52,6 | 52,6 EAFSLFDKDGDTITTK           | 17 | 615,64 | 1843,88 |
| 16919 IPI00165393 | 68,9 | 68,9 DLSTVEALQNLK               | 12 | 665,86 | 1329,71 |

|       |             |      |      |                         |    |        |         |
|-------|-------------|------|------|-------------------------|----|--------|---------|
| 16082 | IPI00023785 | 57,6 | 57,6 | GTAYTFFTPGNLK           | 13 | 708,86 | 1415,71 |
| 10744 | IPI00010810 | 29,6 | 29,6 | LGGEVSCLVAGTK           | 13 | 645,84 | 1289,66 |
| 20837 | IPI00010810 | 47,5 | 47,5 | LEVAPISDIIAIK           | 13 | 691,42 | 1380,82 |
| 18894 | IPI00010810 | 61,2 | 61,2 | ASSTSPVEISEWLDQK        | 16 | 888,94 | 1775,86 |
| 20034 | IPI00296022 | 76,2 | 76,2 | SHTEEDCTEELFDLHAR       | 18 | 745,99 | 2234,95 |
| 6680  | IPI00029601 | 50,2 | 50,2 | SAVGFEYQGK              | 10 | 543,27 | 1084,52 |
| 9169  | IPI00029601 | 66,6 | 66,6 | VDQSAVGFEYQGK           | 13 | 714,34 | 1426,67 |
| 19487 | IPI00029601 | 48,6 | 48,6 | YGLFPANYVELR            | 12 | 721,38 | 1440,74 |
| 14537 | IPI00290566 | 50,6 | 50,6 | IACLDFSLQK              | 10 | 597,81 | 1193,61 |
| 13912 | IPI00290566 | 30,3 | 30,3 | NIEIDSPYEISR            | 12 | 718,36 | 1434,70 |
| 6342  | IPI00020956 | 36   | 36   | GYPHWPAR                | 8  | 492,25 | 982,48  |
| 18492 | IPI00020956 | 59,2 | 59,2 | GFSEGLWEIENNPTVK        | 16 | 910,45 | 1818,88 |
| 27237 | IPI00386119 | 99,1 | 99,1 | V(M)IPQDEYPEINFVGLLIGPR | 21 | 806,09 | 2415,25 |
| 25892 | IPI00017469 | 82,9 | 82,9 | VPADLGAEAGLQQLGALR      | 19 | 631,36 | 1891,05 |
| 10637 | IPI00017964 | 77,7 | 77,7 | VAQLEQVYIR              | 10 | 609,85 | 1217,68 |
| 15947 | IPI00177817 | 95,5 | 95,5 | VGEATETALTCLVEK         | 15 | 810,91 | 1619,81 |
| 14324 | IPI00025019 | 86,7 | 86,7 | GAVYSFDPVGSYQR          | 14 | 773,37 | 1544,73 |
| 17022 | IPI00024175 | 87,2 | 87,2 | LTVEDPVTVEYITR          | 14 | 817,94 | 1633,86 |
| 20559 | IPI00024175 | 44,5 | 44,5 | AITVFSPDGHLFQVEYAQEAVK  | 22 | 817,08 | 2448,23 |
| 13537 | IPI00550069 | 48,1 | 48,1 | VNPALAE LNLR            | 11 | 605,35 | 1208,69 |
| 17607 | IPI00550069 | 74,5 | 74,5 | SNELGDVGVHCVLQGLQTPSCK  | 22 | 800,05 | 2397,14 |
| 13464 | IPI00016801 | 40,1 | 40,1 | YNLGLDLR                | 8  | 482,27 | 962,52  |
| 18627 | IPI00016801 | 56,1 | 56,1 | AKPYEGSILEADCILIPAASEK  | 23 | 830,75 | 2489,24 |
| 25744 | IPI00334159 | 68,9 | 68,9 | LHLGIPEAVFVEDVDSFMK     | 19 | 716,03 | 2145,08 |
| 23034 | IPI00334159 | 69,8 | 69,8 | LHLGIPEAVFVEDVDSF(M)K   | 19 | 721,36 | 2161,07 |
| 10889 | IPI00015842 | 71,6 | 71,6 | HWILPQDYDHAQAEAR        | 16 | 650,65 | 1948,92 |
| 13209 | IPI00024282 | 76,6 | 76,6 | LLLIGDSGVGK             | 11 | 536,32 | 1070,63 |
| 11622 | IPI00024282 | 29,9 | 29,9 | LQIWDTAGQER             | 11 | 658,83 | 1315,65 |
| 11822 | IPI00470528 | 42,1 | 42,1 | YIQELWR                 | 7  | 504,27 | 1006,52 |
| 23459 | IPI00470528 | 72,8 | 72,8 | FFEVLIDPFHK             | 12 | 502,28 | 1503,81 |

|       |             |      |      |                            |    |        |         |
|-------|-------------|------|------|----------------------------|----|--------|---------|
| 12654 | IPI00010157 | 71,2 | 71,2 | FVIGGPQGDAGLTGR            | 15 | 722,88 | 1443,74 |
| 21134 | IPI00010157 | 55,7 | 55,7 | TCNVLVALEQQSPDIAQGVHLDR    | 23 | 855,10 | 2562,28 |
| 22512 | IPI00022314 | 75,7 | 75,7 | AIWNVINWENVTER             | 14 | 872,44 | 1742,87 |
| 17432 | IPI00003918 | 69,1 | 69,1 | NIPGITLLNVSK               | 12 | 634,88 | 1267,75 |
| 12179 | IPI00003918 | 32,3 | 32,3 | RGPCIIYNED(N)GIIK          | 15 | 588,30 | 1761,87 |
| 15707 | IPI00003918 | 45,7 | 45,7 | APIRPDIVNFVHTNLR           | 16 | 466,26 | 1861,03 |
| 23922 | IPI00014850 | 64   | 64   | DNLSYIEHIFEISR             | 14 | 579,29 | 1734,86 |
| 15137 | IPI00008575 | 50,5 | 50,5 | KDDEENYLDFLSHK             | 14 | 584,94 | 1751,80 |
| 26562 | IPI00008575 | 49,8 | 49,8 | DSLDPSTHAMQLLTAEIEK        | 20 | 749,37 | 2245,09 |
| 11029 | IPI00395769 | 29,7 | 29,7 | THSDQFLVAFK                | 11 | 431,56 | 1291,66 |
| 18209 | IPI00395769 | 98,6 | 98,6 | IYGLGSLALYEK               | 12 | 663,87 | 1325,72 |
| 22472 | IPI00455457 | 33,2 | 33,2 | EAYLVGLFEDTNLCAIHAK        | 19 | 722,03 | 2163,07 |
| 10274 | IPI00005537 | 52,2 | 52,2 | LVESLPQEIK                 | 10 | 578,33 | 1154,65 |
| 13524 | IPI00005537 | 48,1 | 48,1 | NYIQGINLVQAK               | 12 | 680,88 | 1359,75 |
| 7230  | IPI00220991 | 35,4 | 35,4 | KGEIFELK                   | 8  | 482,28 | 962,54  |
| 7140  | IPI00220991 | 48,5 | 48,5 | YNDPIYVK                   | 8  | 506,26 | 1010,51 |
| 26267 | IPI00220991 | 33,7 | 33,7 | APEVSQYIYQVYDSILK          | 17 | 672,68 | 2015,02 |
| 25259 | IPI00220991 | 49,7 | 49,7 | KPSETQELVQQVLSLATQSDNPDLR  | 26 | 971,16 | 2910,46 |
| 28924 | IPI00026781 | 32,7 | 32,7 | ALGLGVEQLPVVFEDVVLHQATILPK | 26 | 929,20 | 2784,56 |
| 21472 | IPI00026781 | 42,4 | 42,4 | LFDHPESPTPNPTEPLFLAQAEVYK  | 25 | 947,48 | 2839,41 |
| 13857 | IPI00012750 | 74,1 | 74,1 | LNNLVLFDK                  | 9  | 538,31 | 1074,61 |
| 8806  | IPI00012750 | 49,2 | 49,2 | LITPAVVSER                 | 10 | 542,82 | 1083,63 |
| 13589 | IPI00221091 | 51,1 | 51,1 | LNIGDLQVTK                 | 10 | 550,82 | 1099,62 |
| 14997 | IPI00301936 | 44,7 | 44,7 | DANLYISGLPR                | 11 | 609,83 | 1217,64 |
| 15884 | IPI00301936 | 74,9 | 74,9 | SLFSSIGEVESAK              | 13 | 677,35 | 1352,68 |
| 17902 | IPI00218993 | 34,7 | 34,7 | N(M)DPLNDNIATLLHQSSDK      | 19 | 714,68 | 2141,00 |
| 5850  | IPI00001960 | 41   | 41   | HPESNTAG(M)DIFAK           | 14 | 511,90 | 1532,69 |
| 10819 | IPI00384016 | 99,6 | 99,6 | TPAFAESVTEGDVR             | 14 | 739,86 | 1477,70 |
| 18047 | IPI00023919 | 41,5 | 41,5 | IDILDSALLRPGR              | 13 | 480,28 | 1437,83 |
| 25252 | IPI00023919 | 65,5 | 65,5 | TMLELLNQLDGFEEK            | 16 | 911,97 | 1821,92 |

|       |             |      |      |                                               |    |         |         |
|-------|-------------|------|------|-----------------------------------------------|----|---------|---------|
| 20649 | IPI00029750 | 47,8 | 47,8 | TTGFGMIYDSL DYAK                              | 15 | 841,39  | 1680,77 |
| 18404 | IPI00029750 | 56,8 | 56,8 | TTGFG(M)IYDSL DYAK                            | 15 | 849,39  | 1696,77 |
| 23897 | IPI00004656 | 64,6 | 64,6 | SNFLNCYVSGFHPSDIEVDLLK                        | 22 | 852,08  | 2553,22 |
| 23537 | IPI00004656 | 34,5 | 34,5 | SNFL(N)CYVSGFHPSDIEVDLLK                      | 22 | 852,41  | 2554,21 |
| 25947 | IPI00216106 | 99,2 | 99,2 | IPAFLNVVDIAGLVK                               | 15 | 523,65  | 1567,93 |
| 18824 | IPI00026182 | 46,7 | 46,7 | FTITPSTTQVVGILK                               | 15 | 802,97  | 1603,92 |
| 9764  | IPI00021766 | 62,5 | 62,5 | GPLPAAPPVAPER                                 | 13 | 636,36  | 1270,70 |
| 17594 | IPI00021766 | 49,7 | 49,7 | LPEDDEPPARPPPPPPASVSPQAEPVWTPPAPAPAAPPSTPAAPK | 45 | 1123,82 | 4491,27 |
| 19427 | IPI00337736 | 81   | 81   | IFGVTTLDIVR                                   | 11 | 617,36  | 1232,71 |
| 22869 | IPI00337736 | 30,9 | 30,9 | SVEELLEAELLK                                  | 12 | 686,88  | 1371,75 |
| 17064 | IPI00337736 | 41,3 | 41,3 | GELTTLIHQEQEK                                 | 13 | 503,95  | 1508,82 |
| 24259 | IPI00337736 | 46,1 | 46,1 | TVEELLETGLIQVATK                              | 16 | 582,00  | 1742,97 |
| 19052 | IPI00005969 | 35   | 35   | FTITPPTAQVVGVLK                               | 15 | 524,31  | 1569,91 |
| 19002 | IPI00005969 | 34,1 | 34,1 | TIDGQQTHACIESHQFQPK                           | 20 | 772,05  | 2313,14 |
| 20674 | IPI00215637 | 72,9 | 72,9 | HVINFDLPSDIEEYVHR                             | 17 | 695,01  | 2082,02 |
| 7319  | IPI00020599 | 51,5 | 51,5 | VHVIFNYK                                      | 8  | 510,29  | 1018,56 |
| 14189 | IPI00020599 | 70,9 | 70,9 | EQFLDGDGWTSR                                  | 12 | 705,82  | 1409,62 |
| 13634 | IPI00015911 | 95,7 | 95,7 | NETLGGTCLNVGCIPSK                             | 17 | 910,44  | 1818,86 |
| 11824 | IPI00329745 | 53,6 | 53,6 | LQDAINILK                                     | 9  | 514,31  | 1026,61 |
| 21084 | IPI00329745 | 68,5 | 68,5 | TVQLTSSELESTLETLK                             | 17 | 940,00  | 1877,98 |
| 6315  | IPI00646425 | 95,6 | 95,6 | YGEAGEGPGWGGAHPR                              | 16 | 533,24  | 1596,71 |
| 5775  | IPI00000873 | 66,8 | 66,8 | VGAFT(M)VCK                                   | 9  | 514,75  | 1027,48 |
| 19892 | IPI00033025 | 82,1 | 82,1 | NLEGYVGFANLPNQVYR                             | 17 | 977,49  | 1952,97 |
| 7969  | IPI00215901 | 36   | 36   | APSVPAAEPEYPK                                 | 13 | 678,35  | 1354,68 |
| 12962 | IPI00215901 | 49   | 49   | LQAYHTQTTPLEIYYR                              | 16 | 666,34  | 1996,00 |
| 16767 | IPI00215901 | 59,2 | 59,2 | LAENFCVCHLATGDMLR                             | 17 | 669,65  | 2005,92 |
| 16257 | IPI00328840 | 55,9 | 55,9 | WQHDLFDSGFGGGAGVETGGK                         | 21 | 707,99  | 2120,95 |
| 13459 | IPI00449049 | 39,2 | 39,2 | TLGDFAAEYAK                                   | 11 | 593,29  | 1184,57 |
| 24867 | IPI00024664 | 70,7 | 70,7 | IGEWELIQESGVPLKPLFGPGYTGIR                    | 26 | 952,85  | 2855,52 |
| 14842 | IPI00465315 | 62,3 | 62,3 | ADLIAYLK                                      | 8  | 453,77  | 905,52  |

|       |             |      |      |                        |    |        |         |
|-------|-------------|------|------|------------------------|----|--------|---------|
| 17709 | IPI00008240 | 60,9 | 60,9 | GFVLQDTVEQLR           | 12 | 702,88 | 1403,74 |
| 17232 | IPI00008240 | 33,9 | 33,9 | GLESLPPLRPQQNPVLPVAGER | 22 | 789,78 | 2366,31 |
| 6260  | IPI00216237 | 41,9 | 41,9 | YP(M)AVGLNK            | 9  | 504,76 | 1007,51 |
| 9091  | IPI00216237 | 38,6 | 38,6 | EVCGFAPYER             | 10 | 614,28 | 1226,54 |
| 17184 | IPI00216237 | 34,6 | 34,6 | EELSNVLAAMR            | 11 | 616,82 | 1231,62 |
| 12719 | IPI00183968 | 68,5 | 68,5 | MEIQEIQLK              | 9  | 566,31 | 1130,60 |
| 12719 | IPI00183968 | 68,5 | 68,5 | MELQEIQLK              | 9  | 566,31 | 1130,60 |
| 27457 | IPI00183968 | 40,6 | 40,6 | AF(M)TADLPNELIELLEK    | 17 | 655,01 | 1962,00 |
| 11327 | IPI00442278 | 45,8 | 45,8 | FINEVLR                | 7  | 445,76 | 889,50  |
| 14167 | IPI00031691 | 59   | 59   | FLDGIYVSEK             | 10 | 585,81 | 1169,60 |
| 6270  | IPI00470525 | 32   | 32   | YGNPWEK                | 7  | 447,21 | 892,41  |
| 13277 | IPI00470525 | 40,9 | 40,9 | VIFLENYR               | 8  | 527,29 | 1052,57 |
| 25317 | IPI00470525 | 48,8 | 48,8 | WLLLCNPGLAELIAEK       | 16 | 920,51 | 1839,00 |
| 6222  | IPI00219913 | 89,2 | 89,2 | SSSSGHYVSWVK           | 12 | 662,32 | 1322,63 |
| 12609 | IPI00008557 | 40,3 | 40,3 | (M)VIITGPPEAQFK        | 13 | 723,89 | 1445,76 |
| 16684 | IPI00305383 | 41,5 | 41,5 | WEVADLQPQLK            | 11 | 663,86 | 1325,70 |
| 13407 | IPI00305383 | 60,5 | 60,5 | NALANPLYCPDYR          | 13 | 783,87 | 1565,73 |
| 12374 | IPI00646689 | 88,2 | 88,2 | SWCPDCVQAEPVVR         | 14 | 851,89 | 1701,76 |
| 11624 | IPI00549343 | 87,5 | 87,5 | ADALQAGASQFETSAAK      | 17 | 833,41 | 1664,80 |
| 17824 | IPI00015671 | 84,9 | 84,9 | SFGGGTGSGFTSLL(M)ER    | 17 | 860,40 | 1718,79 |
| 9096  | IPI00794894 | 37,2 | 37,2 | LYDIDVAK               | 8  | 468,76 | 935,50  |
| 6715  | IPI00794894 | 58,9 | 58,9 | FPLTTESA(M)K           | 10 | 570,78 | 1139,55 |
| 6040  | IPI00018246 | 63,4 | 63,4 | GAA(M)VTAVAYR          | 11 | 563,29 | 1124,56 |
| 15972 | IPI00009030 | 56,1 | 56,1 | IPLNDLFR               | 8  | 494,28 | 986,55  |
| 22949 | IPI00009030 | 43,3 | 43,3 | GILTVDELLAIR           | 12 | 656,90 | 1311,78 |
| 15619 | IPI00554811 | 44,4 | 44,4 | AENFFILR               | 8  | 505,28 | 1008,54 |
| 15559 | IPI00554811 | 42,9 | 42,9 | ELLLQPVTISR            | 11 | 634,88 | 1267,75 |
| 20719 | IPI00021290 | 55,9 | 55,9 | TIAIIAEGIPEALTR        | 15 | 784,46 | 1566,90 |
| 27564 | IPI00021290 | 32,4 | 32,4 | DLVSSLTSGLLTIGDR       | 16 | 823,95 | 1645,89 |
| 22377 | IPI00021290 | 43,7 | 43,7 | GQELIYAGMPITEVFK       | 16 | 898,47 | 1794,92 |

|                   |      |                                   |    |         |         |
|-------------------|------|-----------------------------------|----|---------|---------|
| 19287 IPI00028004 | 64,4 | 64,4 FGPYYTEPVIAGLDPK             | 16 | 883,95  | 1765,89 |
| 26752 IPI00550364 | 85   | 85 ELNELVSAIEEHFFQPQK             | 18 | 720,03  | 2157,07 |
| 12989 IPI00026167 | 84,7 | 84,7 LLDLVQQSCNYK                 | 12 | 740,88  | 1479,74 |
| 26404 IPI00412545 | 76,4 | 76,4 KLEDQLQGGQLEEVILQAEHELNLAR   | 26 | 744,14  | 2972,55 |
| 26379 IPI00412545 | 38,4 | 38,4 KLED(Q)LQGGQLEEVILQAEHELNLAR | 26 | 744,40  | 2973,56 |
| 20734 IPI00009305 | 72,1 | 72,1 YFTLGLPTGSTPLGCKYK           | 17 | 937,97  | 1873,93 |
| 14144 IPI00103994 | 38,2 | 38,2 VFASLNAGIIK                  | 12 | 631,36  | 1260,71 |
| 20759 IPI00103994 | 73,6 | 73,6 SFITTDVNPYYDSFVR             | 16 | 962,46  | 1922,90 |
| 11104 IPI00790498 | 34,4 | 34,4 VQIEHISSLIK                  | 11 | 422,92  | 1265,73 |
| 19064 IPI00790498 | 73,7 | 73,7 LYDNLLEQNLIR                 | 12 | 752,41  | 1502,81 |
| 14364 IPI00221178 | 53,5 | 53,5 LGLSTLGELK                   | 10 | 515,81  | 1029,61 |
| 18494 IPI00025874 | 37,4 | 37,4 FPLFGGWK                     | 8  | 476,26  | 950,50  |
| 14329 IPI00025874 | 52,1 | 52,1 TILPAAAQDVYYR                | 13 | 740,89  | 1479,77 |
| 20274 IPI00025874 | 44   | 44 DTFNHLTTWLEDAR                 | 14 | 573,61  | 1717,81 |
| 20154 IPI00005154 | 82,8 | 82,8 FDEISFVNFAR                  | 11 | 672,83  | 1343,65 |
| 12572 IPI00217236 | 82,8 | 82,8 LEAAYLDLQR                   | 10 | 596,32  | 1190,63 |
| 15769 IPI00021728 | 80,4 | 80,4 TSFVNFTDICK                  | 11 | 666,32  | 1330,62 |
| 7396 IPI00140827  | 82,3 | 82,3 VAGQDGSVVQFK                 | 12 | 617,82  | 1233,63 |
| 12554 IPI00297982 | 82,2 | 82,2 IVLTNPVCTEVGEK               | 14 | 779,91  | 1557,81 |
| 6525 IPI00013452  | 68,9 | 68,9 VSQGQLVV(M)QPEK              | 13 | 729,88  | 1457,75 |
| 17682 IPI00013452 | 34,2 | 34,2 THVADFAPEVAWVTR              | 15 | 566,96  | 1697,85 |
| 22089 IPI00013452 | 35,9 | 35,9 LSSCDSFTSTINELNHCLSLR        | 21 | 818,72  | 2453,13 |
| 27312 IPI00013452 | 30,8 | 30,8 YNVYPTYDFACPIVDSIEGVTHALR    | 25 | 967,47  | 2899,39 |
| 15719 IPI00216085 | 33,3 | 33,3 NCWQNYLDFHR                  | 11 | 518,23  | 1551,67 |
| 22049 IPI00216085 | 81,3 | 81,3 VYQSLCPTSWVTDWDEQR           | 18 | 1135,51 | 2269,01 |
| 19942 IPI00742805 | 69,9 | 69,9 ISLGLPVGAVINCADNTGAK         | 20 | 985,52  | 1969,03 |
| 8404 IPI00465431  | 57   | 57 GNDVAFHFNPR                    | 11 | 637,31  | 1272,60 |
| 27922 IPI00168184 | 58,2 | 58,2 DNTIEHLLPLFLAQLK             | 16 | 622,36  | 1864,05 |
| 26024 IPI00168184 | 38,8 | 38,8 QLSQSLLPAIVELAEDAK           | 18 | 642,36  | 1924,05 |
| 19429 IPI00168184 | 34,4 | 34,4 IGPILDNSTLQSEVKPILEK         | 20 | 732,08  | 2193,23 |



|       |             |      |      |                         |    |        |         |
|-------|-------------|------|------|-------------------------|----|--------|---------|
| 25382 | IPI00017704 | 74   | 74   | FALITWIGENVSGLQR        | 16 | 602,00 | 1802,97 |
| 25254 | IPI00021048 | 42,4 | 42,4 | KVDNELNPVWNEILEFDLR     | 19 | 781,74 | 2342,19 |
| 7716  | IPI00029623 | 73,3 | 73,3 | HITIFSPEGR              | 10 | 578,81 | 1155,60 |
| 15849 | IPI00029623 | 35   | 35   | LLDSSTVTHLFK            | 12 | 454,25 | 1359,74 |
| 13332 | IPI00297160 | 78,5 | 78,5 | YGFIEGHVVIPR            | 12 | 462,92 | 1385,75 |
| 13939 | IPI00456887 | 78   | 78   | DLLVQQASQCLSK           | 13 | 745,39 | 1488,76 |
| 22689 | IPI00022442 | 78   | 78   | LMCPQEIVDYIADK          | 14 | 847,91 | 1693,81 |
| 7027  | IPI00473014 | 34,4 | 34,4 | HFGVGLPEK               | 9  | 529,28 | 1056,54 |
| 5470  | IPI00473014 | 43,2 | 43,2 | HFGV(M)LPEK             | 9  | 537,28 | 1072,54 |
| 24332 | IPI00220637 | 35,9 | 35,9 | LDLEAWFPGSGAFR          | 14 | 783,39 | 1564,77 |
| 11654 | IPI00014537 | 53,5 | 53,5 | WIYEDVER                | 8  | 555,27 | 1108,52 |
| 18499 | IPI00014537 | 34   | 34   | EEFTAFLHPPEEYDY(M)K     | 16 | 688,97 | 2063,88 |
| 17479 | IPI00016910 | 52,3 | 52,3 | ELLGQGLLLR              | 10 | 556,35 | 1110,68 |
| 16049 | IPI00016910 | 49,8 | 49,8 | FEELTNLIR               | 9  | 567,81 | 1133,61 |
| 12452 | IPI00026185 | 72   | 72   | STLNEIYFGK              | 10 | 586,30 | 1170,59 |
| 23269 | IPI00030702 | 60,5 | 60,5 | ENTEGEYSGIEHVIVDGVVQSIK | 23 | 834,75 | 2501,23 |
| 24017 | IPI00030706 | 75,7 | 75,7 | VFTTQELVQAFTHAPATLEADR  | 22 | 815,75 | 2444,23 |
| 18572 | IPI00018140 | 39,2 | 39,2 | NLANTVTEEILEK           | 13 | 737,39 | 1472,77 |
| 8474  | IPI00410693 | 75,2 | 75,2 | PGHLQEGFGCVVTNR         | 15 | 557,61 | 1669,80 |
| 10116 | IPI00008418 | 74,7 | 74,7 | LAEAQIEELR              | 10 | 586,32 | 1170,62 |
| 12347 | IPI00419373 | 68,1 | 68,1 | WGTLTDCVV(M)R           | 11 | 677,32 | 1352,62 |
| 13099 | IPI00216298 | 74,5 | 74,5 | TAFQEALDAAGDK           | 13 | 668,82 | 1335,63 |
| 17539 | IPI00396370 | 74,5 | 74,5 | GTQGVVTNFEIFR           | 13 | 734,38 | 1466,75 |
| 13554 | IPI00297084 | 40,6 | 40,6 | SSLNPILFR               | 9  | 523,80 | 1045,59 |
| 18279 | IPI00297084 | 51,9 | 51,9 | TLVLLDNLNVR             | 11 | 635,38 | 1268,74 |
| 9521  | IPI00549672 | 37,2 | 37,2 | VLDLQQIK                | 8  | 478,79 | 955,57  |
| 18647 | IPI00549672 | 32,3 | 32,3 | LYENFISEFEHR            | 12 | 528,59 | 1582,74 |
| 10607 | IPI00031801 | 73,3 | 73,3 | (N)GYGFINR              | 8  | 471,23 | 940,44  |
| 18744 | IPI00028055 | 73,2 | 73,2 | IPDQLVILDMK             | 11 | 642,86 | 1283,72 |
| 17417 | IPI00295741 | 60,1 | 60,1 | DLTDYLMK                | 8  | 499,75 | 997,48  |

|                   |      |                               |    |        |         |
|-------------------|------|-------------------------------|----|--------|---------|
| 7105 IPI00295741  | 37,9 | 37,9 ICEPGYSPTYK              | 11 | 657,81 | 1313,60 |
| 13264 IPI00295741 | 31,8 | 31,8 GQDHCGIESEVVAGIPR        | 17 | 608,63 | 1822,86 |
| 12207 IPI00021840 | 49,5 | 49,5 LNISFPATGCQK             | 12 | 668,34 | 1334,66 |
| 18614 IPI00003925 | 68,2 | 68,2 TYY(M)SGGLQPVPVIFR       | 16 | 922,47 | 1842,93 |
| 19082 IPI00037448 | 72,2 | 72,2 IAAAGLDVTSPEPLPTNHPLLTLK | 24 | 823,46 | 2467,37 |
| 13292 IPI00014177 | 53,7 | 53,7 LTVVDTPGYGDAINCR         | 16 | 875,92 | 1749,84 |
| 24504 IPI00014177 | 44,9 | 44,9 STLINSLFLTDLYPER         | 16 | 941,50 | 1880,99 |
| 17669 IPI00028376 | 71,5 | 71,5 FIDTSQFILNR              | 11 | 677,36 | 1352,71 |
| 12337 IPI00008494 | 42,1 | 42,1 VTL(N)GVPAQPLGPR         | 14 | 710,40 | 1418,79 |
| 18077 IPI00008494 | 57   | 57 VELAPLPSWQPVGK             | 14 | 760,93 | 1519,84 |
| 20562 IPI00006684 | 82,6 | 82,6 NLATTVTEEILEK            | 13 | 730,90 | 1459,78 |
| 26002 IPI00006684 | 71   | 71 GTLGGLFSQILQGEDIVR         | 18 | 952,02 | 1902,02 |
| 9524 IPI00015018  | 74,8 | 74,8 HTGCCGDNDPIDVCEIGSK      | 19 | 711,96 | 2132,85 |
| 9044 IPI00021926  | 34,5 | 34,5 GCLLYGPPGTGK             | 12 | 610,31 | 1218,61 |
| 21229 IPI00021926 | 33,8 | 33,8 ALQSVGQIVGEVLK           | 14 | 480,95 | 1439,83 |
| 22182 IPI00021926 | 31,7 | 31,7 EVIELPLTNPELFQR          | 15 | 899,49 | 1796,97 |
| 6622 IPI00010271  | 51,7 | 51,7 HHCPNTPHILVGTK           | 14 | 529,62 | 1585,84 |
| 8124 IPI00010271  | 97,7 | 97,7 HGEVCPAGWKPGSDTIKPDVQK   | 22 | 602,30 | 2405,18 |
| 19007 IPI00300074 | 61,7 | 61,7 DLLFQALGR                | 9  | 516,80 | 1031,58 |
| 20579 IPI00300074 | 34,8 | 34,8 LFEISDIVIK               | 10 | 588,85 | 1175,68 |
| 17687 IPI00383539 | 69,9 | 69,9 DIYWNTLNSGR              | 11 | 669,83 | 1337,64 |
| 16649 IPI00383539 | 96,3 | 96,3 YINENLIVNTDELGR          | 15 | 881,95 | 1761,89 |
| 12019 IPI00306332 | 54,7 | 54,7 VFQFLNAK                 | 8  | 483,77 | 965,53  |
| 17149 IPI00306332 | 36,7 | 36,7 DLSSVQTLLTK              | 11 | 602,84 | 1203,67 |
| 11224 IPI00306332 | 39,7 | 39,7 AITGASLADI(M)AK          | 13 | 639,34 | 1276,67 |
| 19092 IPI00179953 | 34   | 34 AFGPGLEPTGCIVDKPAEFTIDAR   | 24 | 854,43 | 2560,26 |
| 18904 IPI00022970 | 68,7 | 68,7 LESALTELEQLR             | 12 | 701,38 | 1400,75 |
| 19207 IPI00022970 | 97,3 | 97,3 VESLQEEIAFLK             | 12 | 703,38 | 1404,75 |
| 24034 IPI00022970 | 82,7 | 82,7 LQEVIELLSLEK             | 13 | 757,94 | 1513,86 |
| 17062 IPI00022970 | 47,8 | 47,8 FDTGNLCMVTGGANLGR        | 17 | 891,92 | 1781,82 |

|       |             |      |      |                                 |    |         |         |
|-------|-------------|------|------|---------------------------------|----|---------|---------|
| 12859 | IPI00373857 | 38,8 | 38,8 | LWDLTTGTTTR                     | 11 | 632,83  | 1263,65 |
| 5712  | IPI00031836 | 68,7 | 68,7 | IAEIEAE(M)AR                    | 10 | 574,78  | 1147,55 |
| 25434 | IPI00008868 | 68,5 | 68,5 | NLISPDLGVVFLNVPENLK             | 19 | 1041,09 | 2080,16 |
| 17764 | IPI00220487 | 50,4 | 50,4 | YPYWPHQPIENL                    | 12 | 778,88  | 1555,75 |
| 20457 | IPI00220487 | 43,3 | 43,3 | LAALPENPPAIDWAYYK               | 17 | 966,50  | 1930,98 |
| 13889 | IPI00002520 | 48   | 48   | VLELVSITANK                     | 11 | 593,86  | 1185,70 |
| 18954 | IPI00306301 | 67,9 | 67,9 | GFCHLCDGQEACCVGLEAGINPTDHLITAYR | 31 | 884,40  | 3533,56 |
| 19249 | IPI00221092 | 45,7 | 45,7 | LLEPVLLLK                       | 10 | 547,86  | 1093,71 |
| 17644 | IPI00221224 | 67,6 | 67,6 | YLSYTLNPDLIR                    | 12 | 734,40  | 1466,78 |
| 25422 | IPI00298961 | 35,1 | 35,1 | LDINLLDNVVNCLYHGEGAQQR          | 22 | 847,76  | 2540,25 |
| 14597 | IPI00009771 | 66,4 | 66,4 | LESLSYQLSGLQK                   | 13 | 733,40  | 1464,78 |
| 16189 | IPI00218606 | 64,5 | 64,5 | VANVSLLALYK                     | 11 | 595,86  | 1189,71 |
| 7524  | IPI00219160 | 33,6 | 33,6 | IVYLYTK                         | 7  | 450,26  | 898,52  |
| 8039  | IPI00219160 | 55,8 | 55,8 | AFLIEEQK                        | 8  | 489,27  | 976,52  |
| 5015  | IPI00217143 | 30,6 | 30,6 | S(M)TLEIR                       | 7  | 433,23  | 864,44  |
| 23104 | IPI00217143 | 58   | 58   | AGLPCQDLEFVQFHPTGIYGAGCLITEGCR  | 30 | 1122,86 | 3365,56 |
| 18192 | IPI00296053 | 41,2 | 41,2 | VAALTGLPFVTAPNK                 | 15 | 749,93  | 1497,85 |
| 26427 | IPI00296053 | 33,7 | 33,7 | ETAIELGYLTAEQFDEWVKPK           | 21 | 823,08  | 2466,23 |
| 14432 | IPI00006211 | 63,1 | 63,1 | GPFTDVVTTNLK                    | 12 | 646,35  | 1290,68 |
| 24384 | IPI00141318 | 56,8 | 56,8 | VQSLQATFGTFESILR                | 16 | 898,98  | 1795,95 |
| 21124 | IPI00004358 | 29,9 | 29,9 | LLPLVSDEVFIR                    | 12 | 700,91  | 1399,81 |
| 21822 | IPI00027497 | 46,6 | 46,6 | TLAQLNPESLFIASK                 | 17 | 916,51  | 1831,01 |
| 23412 | IPI00168479 | 61,7 | 61,7 | GLTVPIASIDIPSGWDVEK             | 19 | 999,03  | 1996,05 |
| 18097 | IPI00299608 | 61,7 | 61,7 | TPEQCPSVVSLLSESYNPHVR           | 21 | 800,39  | 2398,16 |
| 11402 | IPI00382869 | 58,5 | 58,5 | LTVAVAFR                        | 8  | 438,77  | 875,52  |
| 18644 | IPI00005158 | 39,5 | 39,5 | DIIALNPLYR                      | 10 | 594,34  | 1186,67 |
| 21457 | IPI00005158 | 45,4 | 45,4 | LSSDVLTLLIK                     | 11 | 601,37  | 1200,73 |
| 5945  | IPI00335061 | 61,3 | 61,3 | L(M)AFQPAPK                     | 9  | 509,77  | 1017,53 |
| 18082 | IPI00413451 | 60,2 | 60,2 | IAELLSPGSVDPLTR                 | 15 | 784,44  | 1566,86 |
| 7232  | IPI00017596 | 33,1 | 33,1 | LEHEYIQNFK                      | 10 | 440,89  | 1319,65 |

|       |             |      |      |                             |    |        |         |
|-------|-------------|------|------|-----------------------------|----|--------|---------|
| 11059 | IPI00017596 | 48,5 | 48,5 | QGQETAVAPSLVAPALNKPK        | 20 | 673,71 | 2018,12 |
| 13422 | IPI00005648 | 53,1 | 53,1 | GFSLEELR                    | 8  | 475,75 | 949,49  |
| 14264 | IPI00005648 | 59,7 | 59,7 | ILDILGETCK                  | 10 | 581,31 | 1160,61 |
| 5080  | IPI00000494 | 33,6 | 33,6 | HI(M)GQNVADY(M)R            | 12 | 489,56 | 1465,64 |
| 23814 | IPI00013877 | 51   | 51   | ATENDIANFFSPLNPIR           | 17 | 959,99 | 1917,96 |
| 10647 | IPI00215780 | 34,5 | 34,5 | VPEWVDTVK                   | 9  | 536,79 | 1071,56 |
| 21574 | IPI00011284 | 58,7 | 58,7 | GTVLLADNVICPGAPDFLAHVR      | 22 | 779,08 | 2334,22 |
| 24217 | IPI00074587 | 58   | 58   | YGPIVDVYVPLDFYTR            | 16 | 958,99 | 1915,97 |
| 22127 | IPI00429191 | 58   | 58   | VNIDFEPFKPINTSLYLCDNK       | 21 | 843,09 | 2526,25 |
| 8309  | IPI00012345 | 57,7 | 57,7 | TNEGVIEFR                   | 9  | 532,77 | 1063,53 |
| 23364 | IPI00301154 | 97,7 | 97,7 | SICTTVLELLDK                | 12 | 696,38 | 1390,74 |
| 13947 | IPI00025039 | 54,9 | 54,9 | LAAAILGGVDQIHIKPGAK         | 19 | 468,78 | 1871,10 |
| 6952  | IPI00008380 | 29,7 | 29,7 | GGWGISPR                    | 8  | 415,22 | 828,42  |
| 21744 | IPI00008380 | 35,1 | 35,1 | GAGYTFGQDISETFNHA(N)GLTLVSR | 25 | 886,09 | 2655,26 |
| 23734 | IPI00029264 | 39,6 | 39,6 | HGGEDYVFSLLTGYCEPPTGVSLR    | 24 | 885,42 | 2653,25 |
| 19602 | IPI00184848 | 44,4 | 44,4 | SL(N)I(Q)WLR                | 8  | 516,28 | 1030,54 |
| 17134 | IPI00023640 | 56   | 56   | VSEQGLIEILK                 | 11 | 614,86 | 1227,71 |
| 10817 | IPI00217269 | 55,6 | 55,6 | LLLLGAGESGK                 | 11 | 529,31 | 1056,61 |
| 23559 | IPI00217269 | 62,2 | 62,2 | IDFEDVIAEPEGTHSFDGIWK       | 21 | 802,38 | 2404,12 |
| 15219 | IPI00218342 | 55,1 | 55,1 | YVVVTGITPTPLGEGK            | 16 | 815,96 | 1629,90 |
| 20772 | IPI00007175 | 54,8 | 54,8 | YIGENLQLLVDRPDGTYCFR        | 20 | 810,40 | 2428,18 |
| 14824 | IPI00744618 | 43,8 | 43,8 | ESVPEFPLSPPK                | 12 | 663,85 | 1325,69 |
| 17224 | IPI00744618 | 29,8 | 29,8 | ASGQAFELILSPR               | 13 | 694,88 | 1387,75 |
| 10547 | IPI00300371 | 54,6 | 54,6 | HIANYISGIQTIGHR             | 15 | 560,64 | 1678,89 |
| 25169 | IPI00030363 | 54,4 | 54,4 | TPIGSFLGSLLLPATK            | 17 | 851,49 | 1700,97 |
| 16279 | IPI00007402 | 39,7 | 39,7 | AFAVGVQQVLLK                | 12 | 636,89 | 1271,76 |
| 23384 | IPI00007402 | 33,9 | 33,9 | ENIVEAIIHSPELIR             | 15 | 578,32 | 1731,95 |
| 15044 | IPI00029444 | 53,5 | 53,5 | LPLPEPWR                    | 8  | 504,29 | 1006,56 |
| 6960  | IPI00216659 | 35,6 | 35,6 | FAEYGEIK                    | 8  | 478,74 | 955,46  |
| 12624 | IPI00216659 | 40,8 | 40,8 | GYTLVEYETYK                 | 11 | 683,33 | 1364,65 |

|       |             |      |      |                                      |    |        |         |
|-------|-------------|------|------|--------------------------------------|----|--------|---------|
| 13782 | IPI00010740 | 37   | 37   | DHQYQFLEDAVR                         | 12 | 507,58 | 1519,71 |
| 21374 | IPI00010740 | 46   | 46   | LFVGNLPADITEDEFK                     | 16 | 904,46 | 1806,90 |
| 27442 | IPI00010740 | 30,1 | 30,1 | NLSPYVSNELLEEAQFGPIER                | 23 | 880,44 | 2638,29 |
| 11427 | IPI00022694 | 87,5 | 87,5 | TVIIQSWGSPK                          | 12 | 672,86 | 1343,71 |
| 13377 | IPI00022694 | 52,8 | 52,8 | IIAFVGGSPVEDNEK                      | 14 | 759,40 | 1516,78 |
| 7195  | IPI00299155 | 29,5 | 29,5 | TTIFSPEGR                            | 9  | 504,26 | 1006,51 |
| 18157 | IPI00299155 | 37,2 | 37,2 | LLDEVFFSEK                           | 10 | 613,82 | 1225,62 |
| 7150  | IPI00304596 | 52,3 | 52,3 | VELDN(M)PLR                          | 9  | 551,78 | 1101,55 |
| 12999 | IPI00163187 | 39,5 | 39,5 | LVARPEPATGYTLEFR                     | 16 | 607,33 | 1818,96 |
| 5942  | IPI00000477 | 42   | 42   | VF(M)QEFK                            | 7  | 472,73 | 943,45  |
| 16917 | IPI00291510 | 52   | 52   | NLIDAGVDALR                          | 11 | 578,82 | 1155,62 |
| 14797 | IPI00550917 | 44,3 | 44,3 | ETIELVHTEPTDVAQLPSR                  | 19 | 712,37 | 2134,09 |
| 14814 | IPI00219025 | 52   | 52   | AQEILSQLPIK                          | 11 | 620,37 | 1238,72 |
| 6437  | IPI00219840 | 52   | 52   | HTNFVEFR                             | 8  | 525,26 | 1048,51 |
| 5407  | IPI00008918 | 51,8 | 51,8 | VGVLAAAS(M)EAK                       | 11 | 546,29 | 1090,57 |
| 22537 | IPI00024989 | 51,7 | 51,7 | (M)GYAEEAPYDAIHVGAAAPVVPQALIDQLKPGGR | 34 | 880,95 | 3519,78 |
| 16819 | IPI00328293 | 51,6 | 51,6 | VNLEVIKPWITK                         | 12 | 480,63 | 1438,85 |
| 15484 | IPI00759723 | 50,5 | 50,5 | GFDILGIKPVQR                         | 12 | 448,27 | 1341,78 |
| 25217 | IPI00334190 | 50,4 | 50,4 | ILEPGLNILIPVLDR                      | 15 | 838,01 | 1674,01 |
| 13497 | IPI00000861 | 47,1 | 47,1 | GFSVVADTPELQR                        | 13 | 709,87 | 1417,72 |
| 11422 | IPI00059366 | 38,8 | 38,8 | FVIHCNSPVWGADK                       | 14 | 543,93 | 1628,78 |
| 18582 | IPI00059366 | 39,9 | 39,9 | GVTIASGGVLPNIHPELLAK                 | 20 | 662,72 | 1985,13 |
| 7185  | IPI00013895 | 32,5 | 32,5 | DGYNYTLSK                            | 9  | 530,75 | 1059,49 |
| 22227 | IPI00013895 | 49,1 | 49,1 | TEFLSF(M)NTELA AFTK                  | 16 | 933,45 | 1864,89 |
| 24664 | IPI00411984 | 50,1 | 50,1 | TLIEDEIATILK                         | 12 | 679,89 | 1357,77 |
| 8356  | IPI00006362 | 50   | 50   | INEKPQVIADYESGR                      | 15 | 573,63 | 1717,86 |
| 7215  | IPI00018352 | 46,5 | 46,5 | LGVAGQWR                             | 8  | 443,75 | 885,48  |
| 12439 | IPI00018352 | 31,5 | 31,5 | LGFEDGSVLK                           | 10 | 532,78 | 1063,55 |
| 16589 | IPI00412579 | 30,5 | 30,5 | AVDIPHMDIEALK                        | 13 | 484,59 | 1450,75 |
| 10414 | IPI00412579 | 38   | 38   | FSVCVLGDQQHCDEAK                     | 16 | 631,61 | 1891,82 |

|                   |      |                                       |    |         |         |
|-------------------|------|---------------------------------------|----|---------|---------|
| 20797 IPI00030243 | 49,7 | 49,7 LLELDSFLK                        | 9  | 539,31  | 1076,61 |
| 24939 IPI00025698 | 40   | 40 ELLVDCYKPTAFISGLLDK                | 20 | 771,07  | 2310,18 |
| 11244 IPI00759493 | 49,3 | 49,3 LIGPNCPGVINPGECK                 | 16 | 862,93  | 1723,84 |
| 16347 IPI00019755 | 49,1 | 49,1 VPSLVGSFIR                       | 10 | 537,82  | 1073,62 |
| 18554 IPI00027809 | 48,9 | 48,9 YLFLGDYVDR                       | 10 | 630,82  | 1259,62 |
| 19609 IPI00219446 | 48,6 | 48,6 WSGPLSLQEVDEQPQHPLHVTYAGAAVDELGK | 32 | 868,68  | 3470,71 |
| 12477 IPI00024157 | 42,2 | 42,2 DHLVTAYNHLFETK                   | 14 | 563,29  | 1686,84 |
| 16389 IPI00007764 | 47,7 | 47,7 VLRPPGGGSNFSLGFDEPTEQPVR         | 24 | 852,76  | 2555,27 |
| 22634 IPI00647421 | 47,2 | 47,2 NNEDISIIPPLFTVSVDHR              | 19 | 722,71  | 2165,11 |
| 13754 IPI00183695 | 34,3 | 34,3 EFPGFLENQK                       | 10 | 604,80  | 1207,59 |
| 9889 IPI00007928  | 54,5 | 54,5 NLQYYDISAK                       | 10 | 607,81  | 1213,60 |
| 24409 IPI00007928 | 40,3 | 40,3 TEDPDLPAFYFDPLINPISHR            | 21 | 819,74  | 2456,20 |
| 27862 IPI00028109 | 38,7 | 38,7 ERPPNPIEFLASYLLK                 | 16 | 629,68  | 1886,03 |
| 10544 IPI00011126 | 29,2 | 29,2 GVILYGPPGTGK                     | 12 | 579,83  | 1157,64 |
| 10544 IPI00011126 | 29,2 | 29,2 GVLLYGPPGTGK                     | 12 | 579,83  | 1157,64 |
| 21659 IPI00011126 | 35,8 | 35,8 VAEHAPSIVFIDEIDAIGTK             | 21 | 752,06  | 2253,15 |
| 23937 IPI00007052 | 34,8 | 34,8 GIVLLEELLPK                      | 11 | 612,38  | 1222,75 |
| 20684 IPI00291669 | 46,6 | 46,6 GLIDVKPLGVIWGK                   | 14 | 498,97  | 1493,90 |
| 13672 IPI00219229 | 46,5 | 46,5 GDGVVLVAPPLR                     | 12 | 596,86  | 1191,70 |
| 4972 IPI00219575  | 46,1 | 46,1 EHVKPLFN(M)EDK                   | 12 | 501,58  | 1501,72 |
| 7666 IPI00335132  | 46   | 46 KHPDASVNFSEFSK                     | 14 | 531,59  | 1591,76 |
| 7304 IPI00335132  | 61,1 | 61,1 KHPDSSVNFAEFSK                   | 14 | 531,59  | 1591,76 |
| 20904 IPI00018522 | 45,9 | 45,9 WLAPDGLIFPDR                     | 12 | 700,37  | 1398,73 |
| 23259 IPI00012772 | 45,9 | 45,9 AQLNIGNVLPVGTMPGEGTIVCCLEEKPGDR  | 30 | 1089,88 | 3266,61 |
| 8224 IPI00219005  | 47,2 | 47,2 VGEVCHITCKPEYAYGSAGSPPK          | 23 | 627,55  | 2506,16 |
| 9576 IPI00006181  | 45,4 | 45,4 IFHTVTTTDDPVIR                   | 14 | 538,95  | 1613,84 |
| 18557 IPI00006181 | 77,2 | 77,2 IDGQQTHIACIESHQFQAK              | 19 | 729,70  | 2186,08 |
| 20767 IPI00060181 | 45,4 | 45,4 EFLIFR                           | 7  | 469,28  | 936,54  |
| 5602 IPI00031131  | 30   | 30 VYVSGL(M)K                         | 8  | 456,75  | 911,48  |
| 6192 IPI00031131  | 53,1 | 53,1 IYF(M)AGSSR                      | 9  | 524,25  | 1046,49 |

|       |             |      |      |                            |    |        |         |
|-------|-------------|------|------|----------------------------|----|--------|---------|
| 17309 | IPI00031131 | 36,2 | 36,2 | GLFEVNPWK                  | 9  | 545,29 | 1088,57 |
| 11434 | IPI00031131 | 31,3 | 31,3 | LLSSETPIEGK                | 12 | 643,86 | 1285,71 |
| 17142 | IPI00219330 | 45,1 | 45,1 | LFPDTPLALDANK              | 13 | 707,88 | 1413,75 |
| 16262 | IPI00001589 | 45,1 | 45,1 | VQIAVANAQELLQR             | 14 | 776,94 | 1551,87 |
| 20629 | IPI00798400 | 44,9 | 44,9 | GVIDLIFEK                  | 9  | 517,30 | 1032,59 |
| 10942 | IPI00798400 | 96,5 | 96,5 | LGDLYEEEMR                 | 10 | 627,79 | 1253,56 |
| 9754  | IPI00029740 | 35,9 | 35,9 | TNLPIFK                    | 7  | 416,75 | 831,48  |
| 17049 | IPI00009960 | 44,8 | 44,8 | TSSAETPTIPLGSAVEAIK        | 19 | 936,50 | 1870,99 |
| 9536  | IPI00295857 | 44,6 | 44,6 | LLELGPKEVAQQTR             | 15 | 560,32 | 1677,94 |
| 18089 | IPI00294536 | 36,1 | 36,1 | VWDAVSGDELMTLAHK           | 16 | 591,29 | 1770,86 |
| 10146 | IPI00247583 | 38   | 38   | VYNVTQHAVGIVVNK            | 15 | 547,64 | 1639,90 |
| 20144 | IPI00375631 | 44,5 | 44,5 | VPLASQGLGPGSTVLLVVDK       | 20 | 975,57 | 1949,12 |
| 19737 | IPI00334276 | 44,1 | 44,1 | DIVQFVPER                  | 9  | 560,81 | 1119,61 |
| 18017 | IPI00334276 | 71,2 | 71,2 | LYIGNLNESVTPADLEK          | 17 | 938,49 | 1874,96 |
| 17447 | IPI00059292 | 43,9 | 43,9 | FGHEFLEFEFRPDGK            | 15 | 464,48 | 1853,87 |
| 22629 | IPI00303207 | 91,3 | 91,3 | SLDLDSIIAEVK               | 12 | 651,86 | 1301,71 |
| 13967 | IPI00303207 | 43,7 | 43,7 | TQAIVCQQLDLTHLK            | 15 | 589,99 | 1766,93 |
| 12044 | IPI00305692 | 43,7 | 43,7 | VGVKPVGSDPDFQPELSGAGSR     | 22 | 733,71 | 2198,10 |
| 11279 | IPI00215995 | 43,3 | 43,3 | YLLLAGAPR                  | 9  | 487,29 | 972,58  |
| 7726  | IPI00029012 | 34,3 | 34,3 | PAYFQRPENALK               | 12 | 478,59 | 1432,75 |
| 21994 | IPI00000495 | 43   | 43   | DPNAFLFDHLLTLKPVK          | 17 | 656,70 | 1967,09 |
| 10987 | IPI00024911 | 51,8 | 51,8 | IQVLVEPDHFK                | 11 | 442,25 | 1323,72 |
| 25444 | IPI00024911 | 42,4 | 42,4 | GQGVYLG(M)PGCLPVYDALAGEFIR | 24 | 867,09 | 2598,26 |
| 21044 | IPI00017510 | 42,3 | 42,3 | (M)(M)ITSQDVLHSAVPTLGLK    | 20 | 753,72 | 2258,14 |
| 7112  | IPI00007935 | 42   | 42   | YTEFYHVPTSDASK             | 15 | 594,61 | 1780,80 |
| 17034 | IPI00178431 | 39,3 | 39,3 | DILQNVFK                   | 8  | 488,78 | 975,54  |
| 19639 | IPI00396321 | 30,6 | 30,6 | LVTLPVSAQLK                | 12 | 658,40 | 1314,79 |
| 12404 | IPI00296913 | 41   | 41   | TLHYECIVLVK                | 11 | 458,92 | 1373,74 |
| 24357 | IPI00008998 | 40,8 | 40,8 | VELSDVQNPAISITENVLHFK      | 21 | 785,08 | 2352,23 |
| 7826  | IPI00009104 | 33,2 | 33,2 | TEALTQAFR                  | 9  | 518,77 | 1035,53 |

|                   |      |                                  |    |         |         |
|-------------------|------|----------------------------------|----|---------|---------|
| 12312 IPI00009104 | 30,7 | 30,7 LLIVSTTPYSEK                | 12 | 675,88  | 1349,75 |
| 10474 IPI00299048 | 32,9 | 32,9 LQQLPADFGR                  | 10 | 572,81  | 1143,60 |
| 10724 IPI00014587 | 39,8 | 39,8 ELEEYAR                     | 8  | 548,26  | 1094,50 |
| 3945 IPI00218829  | 39,2 | 39,2 GQQLV(M)(M)PNK              | 10 | 589,29  | 1176,56 |
| 21609 IPI00219871 | 39,1 | 39,1 GFDQTINLILDESHER            | 16 | 629,65  | 1885,92 |
| 21337 IPI00030910 | 39,1 | 39,1 LNEQYEHASIHLDLLEGK          | 19 | 574,54  | 2294,13 |
| 20444 IPI00026216 | 39,1 | 39,1 VLGATLLPDLIQK               | 13 | 690,93  | 1379,84 |
| 14887 IPI00398985 | 38,9 | 38,9 TQTVCNFTDGALVQHQEWDGK       | 21 | 812,04  | 2433,10 |
| 6880 IPI00328350  | 33,2 | 33,2 HGYFCFHEAADQK               | 13 | 537,23  | 1608,68 |
| 10487 IPI00220167 | 37,2 | 37,2 IAEFLNR                     | 7  | 431,74  | 861,47  |
| 12674 IPI00026570 | 38,5 | 38,5 GGVADALLYR                  | 10 | 517,78  | 1033,56 |
| 20224 IPI00294380 | 38,4 | 38,4 LGTPVLQALGDGDFVK            | 16 | 815,45  | 1628,88 |
| 7744 IPI00333215  | 38,3 | 38,3 TGGTQTDLFTCGK               | 13 | 693,32  | 1384,63 |
| 10086 IPI00006482 | 38   | 38 LNIPVSQVNPR                   | 11 | 618,86  | 1235,70 |
| 17524 IPI00306516 | 38   | 38 DWCYEATYSQLAHPIQQAK           | 19 | 770,36  | 2308,05 |
| 11324 IPI00025084 | 37,9 | 37,9 LGFEEFK                     | 7  | 435,22  | 868,43  |
| 5610 IPI00550689  | 37,6 | 37,6 SS(M)TFLTR                  | 8  | 479,74  | 957,46  |
| 15069 IPI00552036 | 37,5 | 37,5 LITTQQWLIK                  | 10 | 622,37  | 1242,73 |
| 17429 IPI00304409 | 37,4 | 37,4 LQAVEVVITHLAPGTK            | 16 | 559,33  | 1674,97 |
| 11492 IPI00215790 | 37,4 | 37,4 DFLLTAR                     | 7  | 418,24  | 834,46  |
| 20604 IPI00034319 | 33,7 | 33,7 TQSSLVPALTDVFR              | 14 | 767,42  | 1532,82 |
| 26544 IPI00034319 | 30,4 | 30,4 SVHPYEVAEVIALPVEQGNFPYLQWVR | 27 | 1047,54 | 3139,61 |
| 12364 IPI00021416 | 37   | 37 GILLYGPPGTGK                  | 12 | 586,84  | 1171,66 |
| 12364 IPI00021416 | 37   | 37 GLLLYGPPGTGK                  | 12 | 586,84  | 1171,66 |
| 8781 IPI00289499  | 37   | 37 TGLVEFAR                      | 8  | 446,75  | 891,48  |
| 17182 IPI00216008 | 77,4 | 77,4 FEELNADLFR                  | 10 | 627,31  | 1252,61 |
| 10336 IPI00375441 | 36,9 | 36,9 IQIAPDSGGLPER               | 13 | 676,86  | 1351,71 |
| 6237 IPI00413778  | 36,7 | 36,7 RGQTCVVHYTG(M)LEDGK         | 17 | 656,31  | 1965,90 |
| 16739 IPI00298406 | 36,5 | 36,5 TFESLVDFSK                  | 10 | 586,79  | 1171,58 |
| 21037 IPI00160021 | 36,4 | 36,4 SVFFGPDFITVTK               | 13 | 729,39  | 1456,76 |



|                   |      |                                    |    |        |         |
|-------------------|------|------------------------------------|----|--------|---------|
| 7734 IPI00003815  | 36,2 | 36,2 TDY(M)VGSYGPR                 | 11 | 631,28 | 1260,54 |
| 7676 IPI00220766  | 35,9 | 35,9 VLG(M)TLIQK                   | 9  | 509,80 | 1017,59 |
| 7884 IPI00017448  | 35,9 | 35,9 TYAICGAIR                     | 9  | 512,77 | 1023,52 |
| 16124 IPI00644127 | 34,2 | 34,2 IVLLDSSLEYK                   | 11 | 640,36 | 1278,71 |
| 18717 IPI00644127 | 35,8 | 35,8 FGWDCHGLPVEYEIDK              | 16 | 655,63 | 1963,88 |
| 23157 IPI00328154 | 35,7 | 35,7 SGPFTHPDFEPSTESLQFLDTC        | 24 | 918,43 | 2752,27 |
| 5607 IPI00100667  | 35,7 | 35,7 KPTEIEWR                      | 8  | 529,78 | 1057,56 |
| 8534 IPI00100667  | 71,8 | 71,8 ESTLHLVLR                     | 9  | 534,31 | 1066,61 |
| 20949 IPI00383531 | 35,3 | 35,3 ESALEPGVPPEAPAGGPVHAVTVVTLLEK | 29 | 955,52 | 2863,53 |
| 20004 IPI00005613 | 35,1 | 35,1 WF(N)GQPIHAELSPVTDNR          | 18 | 705,68 | 2114,02 |
| 22327 IPI00025815 | 34,3 | 34,3 TSDLIVLGLPWK                  | 12 | 671,39 | 1340,77 |
| 21424 IPI00017373 | 33,6 | 33,6 IHDFFPQFYPLGIVQHD             | 17 | 680,35 | 2038,03 |
| 20874 IPI00414320 | 33,5 | 33,5 TPVLFDIYEIK                   | 11 | 669,37 | 1336,73 |
| 9689 IPI00181469  | 63,3 | 63,3 TPAQFDADELN                   | 11 | 631,80 | 1261,59 |
| 18814 IPI00181469 | 31,2 | 31,2 IHFVPGWDCHGLPIEIK             | 17 | 505,26 | 2017,02 |
| 24094 IPI00177728 | 32,8 | 32,8 LPDGSEIPLPPILLGR              | 16 | 843,99 | 1685,97 |
| 20182 IPI00177728 | 39,3 | 39,3 SEAHLTELEEICDR                | 15 | 605,62 | 1813,85 |
| 22179 IPI00011603 | 32,8 | 32,8 HDADGQATLLNLLLR               | 15 | 550,64 | 1648,89 |
| 24874 IPI00746655 | 32,7 | 32,7 LLVPLVPDLQDVAQLR              | 16 | 597,02 | 1788,05 |
| 24317 IPI00747849 | 32,5 | 32,5 VGNVEYFGLGNSPGFPLQYYPYYGK     | 25 | 943,79 | 2828,35 |
| 6727 IPI00216088  | 32,3 | 32,3 PNFSGNWK                      | 8  | 475,23 | 948,44  |
| 15384 IPI00293464 | 32,1 | 32,1 YLAIAPPIIK                    | 10 | 549,85 | 1097,68 |
| 9631 IPI00062814  | 31,6 | 31,6 (S)K(Q)LDAGLAR                | 10 | 570,28 | 1138,54 |
| 20327 IPI00430812 | 31,2 | 31,2 GFQFVSSSLPDICYR               | 15 | 888,42 | 1774,83 |
| 11729 IPI00019932 | 31,1 | 31,1 SQWSPALTISK                   | 11 | 609,33 | 1216,64 |
| 5272 IPI00010706  | 31,1 | 31,1 SDY(M)FQR                     | 7  | 481,71 | 961,40  |
| 16519 IPI00006723 | 31   | 31 HELLLGAGSGPGAGQQQATPGALLQAGPPR  | 30 | 950,50 | 2848,49 |
| 21652 IPI00016613 | 30,9 | 30,9 LIDWGLAEFYHPGQEYNVR           | 19 | 769,71 | 2306,11 |
| 13609 IPI00555902 | 30,8 | 30,8 FHFFEDQLR                     | 9  | 413,54 | 1237,59 |
| 12219 IPI00288940 | 30,6 | 30,6 (S)GLLVLVIR                   | 9  | 525,31 | 1048,60 |

|                   |      |                                   |    |        |         |
|-------------------|------|-----------------------------------|----|--------|---------|
| 15102 IPI00288940 | 35,2 | 35,2 YEDFSNLGTTHLLR               | 14 | 555,95 | 1664,82 |
| 24427 IPI00288940 | 67,4 | 67,4 EFSITDVVPYPISLR              | 15 | 868,47 | 1734,92 |
| 8414 IPI00789207  | 35,8 | 35,8 ANEFLEVVGK                   | 9  | 503,76 | 1005,51 |
| 22059 IPI00018452 | 30,5 | 30,5 SDPFLEFFR                    | 9  | 579,29 | 1156,56 |
| 20152 IPI00017290 | 62,6 | 62,6 ENLLDFIK                     | 8  | 496,28 | 990,54  |
| 12027 IPI00012493 | 30   | 30 LIDLHSPSEIVK                   | 12 | 450,93 | 1349,75 |
| 15039 IPI00010201 | 29,9 | 29,9 ILFFNTPK                     | 8  | 490,28 | 978,55  |
| 16597 IPI00010415 | 29,9 | 29,9 TNIVTASVDAINFHDK             | 16 | 582,30 | 1743,88 |
| 14457 IPI00020530 | 29,8 | 29,8 TLAFTSVDLTNK                 | 12 | 655,35 | 1308,69 |
| 20534 IPI00012795 | 29,8 | 29,8 ITSAVWGPLGECIIAGHESGELNQYSAK | 28 | 996,49 | 2986,45 |
| 8481 IPI00465044  | 29,2 | 29,2 VAI(Q)FLK                    | 7  | 410,25 | 818,49  |
| 8481 IPI00465044  | 29,2 | 29,2 VAIFIEK                      | 7  | 410,25 | 818,49  |
| 22724 IPI00027493 | 29,1 | 29,1 LLTSFLPAQLLR                 | 12 | 686,42 | 1370,83 |
| 5597 IPI00414860  | 29   | 29 AVGIWHCGSC(M)K                 | 12 | 711,31 | 1420,60 |
| 8936 IPI00029133  | 29   | 29 HYLFDVQR                       | 8  | 539,28 | 1076,54 |
| 9416 IPI00718917  | 53   | 53 YGVSGYPTLK                     | 10 | 542,79 | 1083,56 |
| 14617 IPI00010182 | 30,4 | 30,4 WDAWNEK                      | 8  | 531,26 | 1060,50 |
| 5497 IPI00418774  | 50,1 | 50,1 GIAQ(M)LEK                   | 8  | 453,24 | 904,47  |
| 28672 IPI00054042 | 54,5 | 54,5 AGAAPYVQAFDSLLAGPVAEYLK      | 23 | 784,41 | 2350,22 |
| 18387 IPI00153055 | 62,7 | 62,7 GISLNPEQWSQLK                | 13 | 750,40 | 1498,78 |
| 13437 IPI00748810 | 62,1 | 62,1 SPYQEFTDHLVK                 | 12 | 488,58 | 1462,71 |
| 6657 IPI00030098  | 81   | 81 KESYSVYVYK                     | 10 | 633,32 | 1264,63 |
| 21019 IPI00159494 | 63,4 | 63,4 AYLPVNESFGFTADLR             | 16 | 900,45 | 1798,89 |
| 6777 IPI00023283  | 31,9 | 31,9 EQFNEFR                      | 7  | 485,22 | 968,43  |
| 16712 IPI00023283 | 75,3 | 75,3 PPYTVVYFPVR                  | 11 | 669,37 | 1336,72 |
| 17774 IPI00023283 | 71   | 71 IFDSEEILAGYK                   | 12 | 692,85 | 1383,69 |
| 15142 IPI00023283 | 62,7 | 62,7 HLWDYTFGPEK                  | 11 | 696,83 | 1391,65 |
| 19372 IPI00023283 | 74   | 74 QSLGELIGTLNAAK                 | 14 | 707,90 | 1413,78 |
| 14017 IPI00023283 | 72,2 | 72,2 THLPGFVEQAEALK               | 14 | 513,94 | 1538,81 |
| 25314 IPI00023283 | 31,6 | 31,6 HLV(M)GDIPAAVNAFQEAASLLGK    | 23 | 790,08 | 2367,22 |

|       |             |      |      |                            |    |        |         |
|-------|-------------|------|------|----------------------------|----|--------|---------|
| 23772 | IPI00239405 | 74,6 | 74,6 | AAVENLPTFLVELSR            | 15 | 553,64 | 1657,90 |
| 24067 | IPI00239405 | 85,9 | 85,9 | HL(M)LPDFDLLEDIESK         | 16 | 644,32 | 1929,94 |
| 16547 | IPI00456878 | 65,3 | 65,3 | EGLLLWCQR                  | 9  | 587,81 | 1173,60 |
| 13367 | IPI00456878 | 56,1 | 56,1 | AVLFCLSEDK                 | 10 | 591,30 | 1180,58 |
| 22914 | IPI00456878 | 44,4 | 44,4 | VIHDNFGIVEGL(M)TTVHAITATQK | 24 | 871,12 | 2610,35 |
| 7546  | IPI00296365 | 43   | 43   | LAVYIDR                    | 7  | 425,24 | 848,48  |
| 7839  | IPI00296365 | 89,8 | 89,8 | INVYYNEATGGK               | 12 | 664,83 | 1327,64 |
| 20682 | IPI00296365 | 84,3 | 84,3 | LEGLTDEINFLR               | 12 | 710,38 | 1418,74 |
| 12964 | IPI00296365 | 29   | 29   | SKAEAESLYQSKYEELQITAGR     | 22 | 626,07 | 2500,24 |
| 10592 | IPI00745471 | 43,4 | 43,4 | VLFS(N)GGVVK               | 11 | 554,31 | 1106,60 |
| 11504 | IPI00745471 | 86,2 | 86,2 | HALIYDDLK                  | 11 | 644,35 | 1286,69 |
| 9494  | IPI00478226 | 57,3 | 57,3 | VEEIVTLR                   | 9  | 544,30 | 1086,59 |
| 13384 | IPI00784980 | 53,4 | 53,4 | FASENDLPEWK                | 11 | 668,31 | 1334,61 |
| 11789 | IPI00017726 | 30,2 | 30,2 | VDVAVNCAGIAVASK            | 15 | 737,39 | 1472,76 |
| 11517 | IPI00441955 | 77,3 | 77,3 | FNASQLITQR                 | 10 | 589,32 | 1176,62 |
| 8586  | IPI00478021 | 83   | 83   | FDQLLAEEK                  | 9  | 546,78 | 1091,55 |
| 6182  | IPI00465428 | 40   | 40   | QEQSYFVR                   | 8  | 528,76 | 1055,50 |
| 7506  | IPI00303335 | 55   | 55   | SVNELIYK                   | 8  | 483,27 | 964,52  |
| 19587 | IPI00303335 | 71,1 | 71,1 | VLDLDFR                    | 8  | 495,78 | 989,55  |
| 15694 | IPI00303335 | 53   | 53   | SDGIYIINLK                 | 10 | 568,32 | 1134,63 |
| 17384 | IPI00455216 | 63,1 | 63,1 | VED(M)AELTCLNEASVLHNLK     | 20 | 768,04 | 2301,10 |
| 14342 | IPI00479767 | 72,8 | 72,8 | VDSLLENLEK                 | 10 | 580,31 | 1158,61 |
| 14122 | IPI00007927 | 56,2 | 56,2 | DAGTIAGLNVMR               | 12 | 609,32 | 1216,62 |
| 14332 | IPI00291165 | 55,9 | 55,9 | LVILEGELER                 | 10 | 585,84 | 1169,67 |
| 11704 | IPI00478469 | 30,8 | 30,8 | NLGIPLGQDAEEK              | 13 | 692,36 | 1382,70 |
| 18069 | IPI00550232 | 44,5 | 44,5 | VTYHPDGPEGQAYDVFDFTPPFR    | 22 | 836,72 | 2507,14 |
| 18389 | IPI00385980 | 71,2 | 71,2 | DLASVQALLR                 | 10 | 543,32 | 1084,62 |
| 12589 | IPI00414253 | 76,5 | 76,5 | HIEIFDLSSR                 | 11 | 659,34 | 1316,67 |
| 5940  | IPI00167941 | 49,2 | 49,2 | E(M)TGIWR                  | 7  | 454,72 | 907,42  |
| 25087 | IPI00023217 | 75,7 | 75,7 | ITSCIFQLLQEAGIK            | 15 | 574,31 | 1719,92 |

|                   |      |                                |    |        |         |
|-------------------|------|--------------------------------|----|--------|---------|
| 12917 IPI00023217 | 38,6 | 38,6 ELQELVQYPVEHPDK           | 15 | 608,64 | 1822,91 |
| 19087 IPI00791236 | 88,2 | 88,2 ISSIQSIVPALEIANAHR        | 18 | 640,36 | 1918,06 |
| 19507 IPI00791236 | 75,2 | 75,2 ISSIQSIVPALEIA(N)AHR      | 18 | 640,69 | 1919,05 |
| 18534 IPI00104907 | 38,7 | 38,7 GFAFVTFESPADAK            | 14 | 743,86 | 1485,71 |
| 11219 IPI00026466 | 32   | 32 VLDLELK                     | 7  | 415,25 | 828,50  |
| 13469 IPI00642422 | 68,8 | 68,8 FDAGELITQR                | 10 | 575,30 | 1148,58 |
| 23087 IPI00384444 | 73,5 | 73,5 ELYLFDVLR                 | 9  | 584,32 | 1166,63 |
| 22487 IPI00786861 | 30,2 | 30,2 XE(Q)RASIR                | 8  | 479,26 | 956,51  |
| 7127 IPI00786861  | 47,6 | 47,6 FDNLYGCR                  | 8  | 522,73 | 1043,45 |
| 8514 IPI00302453  | 70   | 70 TNSTFNQVVVK                 | 11 | 625,84 | 1249,67 |
| 15269 IPI00302453 | 46   | 46 AITIAGVPQSVTECVK            | 16 | 836,95 | 1671,89 |
| 7062 IPI00807491  | 41,3 | 41,3 LSDGVAVLK                 | 9  | 451,27 | 900,53  |
| 4970 IPI00760833  | 40,8 | 40,8 LSNRPAF(M)PSEGK           | 13 | 483,91 | 1448,71 |
| 12409 IPI00307665 | 79   | 79 ISDSVLVDIK                  | 10 | 544,81 | 1087,61 |
| 9041 IPI00306718  | 57,1 | 57,1 GSGNLEAIHIIK              | 12 | 626,36 | 1250,70 |
| 22964 IPI00747189 | 85,8 | 85,8 SNLAYDIVQLPTGLTGIK        | 18 | 952,03 | 1902,05 |
| 12397 IPI00332643 | 90,7 | 90,7 IFVGGLSPDTPPEEK           | 14 | 744,88 | 1487,75 |
| 7346 IPI00182533  | 30,8 | 30,8 NCSSFLIK                  | 8  | 484,75 | 967,48  |
| 9074 IPI00180384  | 65,7 | 65,7 ALDFIASK                  | 8  | 432,74 | 863,47  |
| 16892 IPI00180384 | 86,5 | 86,5 IEVIEIMTDR                | 10 | 609,82 | 1217,63 |
| 25089 IPI00180384 | 71,5 | 71,5 ITSCIFQLLQEAGIK           | 15 | 860,97 | 1719,92 |
| 4010 IPI00736328  | 48,5 | 48,5 VTDALNATR                 | 9  | 480,76 | 959,50  |
| 11894 IPI00736328 | 36,8 | 36,8 ELCQGLGQPGSVLR            | 14 | 757,39 | 1512,77 |
| 14112 IPI00021700 | 30   | 30 DLSHIGDAVVISCAK             | 15 | 528,94 | 1583,80 |
| 9164 IPI00165138  | 51,9 | 51,9 ALELTGLK                  | 8  | 422,76 | 843,51  |
| 21834 IPI00410549 | 88,3 | 88,3 LFIGGLSFETTEESLR          | 16 | 899,96 | 1797,91 |
| 19212 IPI00041959 | 49   | 49 GGHFAAFEPELLAQDIR           | 18 | 667,33 | 1998,98 |
| 23989 IPI00041959 | 39,2 | 39,2 GGSDPETTGIIQWSEVFTVEKPGGK | 25 | 873,77 | 2618,29 |
| 17347 IPI00472524 | 31,4 | 31,4 VED(M)AELTCLNEASVLHNLK    | 20 | 768,04 | 2301,10 |
| 11559 IPI00020985 | 51,6 | 51,6 TDTVLILCR                 | 9  | 545,80 | 1089,58 |

|       |             |      |      |                         |    |         |         |
|-------|-------------|------|------|-------------------------|----|---------|---------|
| 8344  | IPI00020985 | 35,5 | 35,5 | LGQSDPAPLQHQ(M)DIYQK    | 18 | 695,67  | 2084,00 |
| 12469 | IPI00029162 | 97,1 | 97,1 | SQIFSTASDNQPTVTIK       | 17 | 918,97  | 1835,93 |
| 11494 | IPI00784338 | 34,9 | 34,9 | VCEEIAIIPSK             | 11 | 629,84  | 1257,66 |
| 20384 | IPI00784338 | 62,6 | 62,6 | IPANQLAELWLK            | 12 | 698,40  | 1394,79 |
| 22709 | IPI00452246 | 36,3 | 36,3 | ITGEAFVQFASQELA EK      | 17 | 934,47  | 1866,93 |
| 9781  | IPI00478832 | 68,1 | 68,1 | GATQQILDEAER            | 12 | 665,83  | 1329,65 |
| 23334 | IPI00044751 | 45,7 | 45,7 | TLATDIL(M)GVLK          | 12 | 645,87  | 1289,73 |
| 9491  | IPI00005638 | 51,5 | 51,5 | VLEGMEVVR               | 9  | 516,28  | 1030,55 |
| 5915  | IPI00167732 | 29,1 | 29,1 | LFSQETV(M)K             | 9  | 549,78  | 1097,54 |
| 11809 | IPI00008756 | 35,3 | 35,3 | ELAEQLGLSTGEK           | 13 | 687,86  | 1373,70 |
| 6742  | IPI00478887 | 31   | 31   | LYLADP(M)K              | 8  | 483,75  | 965,49  |
| 10682 | IPI00289861 | 49,9 | 49,9 | VLQALEGLK               | 9  | 485,80  | 969,59  |
| 7012  | IPI00031115 | 72,2 | 72,2 | GNAAWQEQLK              | 10 | 572,79  | 1143,57 |
| 6612  | IPI00022561 | 54,3 | 54,3 | (M)PSLPSYK              | 8  | 469,74  | 937,46  |
| 11082 | IPI00019223 | 63,9 | 63,9 | WQAVLAQTDVR             | 11 | 643,85  | 1285,68 |
| 18567 | IPI00019223 | 45,8 | 45,8 | HFYQPIWTLVGAGAK         | 15 | 563,30  | 1686,89 |
| 17407 | IPI00745038 | 80,5 | 80,5 | GVVQELQQAISK            | 12 | 650,37  | 1298,72 |
| 23632 | IPI00745038 | 32,7 | 32,7 | IIGLDQVAGMSETALPGAFK    | 20 | 1009,53 | 2017,06 |
| 20584 | IPI00002432 | 57,9 | 57,9 | DLGFFGIYK               | 9  | 530,28  | 1058,54 |
| 11732 | IPI00002432 | 81,3 | 81,3 | NLQEAEWYK               | 10 | 655,31  | 1308,60 |
| 20344 | IPI00333770 | 46,6 | 46,6 | ITQDIFQQLK              | 11 | 673,89  | 1345,76 |
| 13482 | IPI00333770 | 59,9 | 59,9 | VGTGEPCCDWVGDEGAGHFVK   | 21 | 759,66  | 2275,96 |
| 20887 | IPI00797838 | 45,5 | 45,5 | FLAAGTHLGGTNLDFQMEQYIYK | 23 | 873,10  | 2616,27 |
| 16229 | IPI00217052 | 88,2 | 88,2 | SLNNQFASFIDK            | 12 | 692,35  | 1382,68 |
| 17079 | IPI00019962 | 43,6 | 43,6 | GELTTLIHQLQEK           | 13 | 755,42  | 1508,82 |
| 7389  | IPI00021943 | 43,2 | 43,2 | FSSVQLR                 | 7  | 418,73  | 835,45  |
| 24772 | IPI00640825 | 59,6 | 59,6 | GLGTDEESILTLLTSR        | 16 | 568,97  | 1703,89 |
| 27832 | IPI00640825 | 65,2 | 65,2 | NVGCLQEALQLATSFAQLR     | 19 | 707,04  | 2118,09 |
| 26717 | IPI00306794 | 98,3 | 98,3 | ICPVETLVEEAIQCAEK       | 17 | 994,99  | 1987,96 |
| 16874 | IPI00008037 | 38,4 | 38,4 | LAGANPAVITCDELLLGHEK    | 20 | 707,70  | 2120,09 |

|                   |      |                                         |    |        |         |
|-------------------|------|-----------------------------------------|----|--------|---------|
| 7120 IPI00180404  | 92,9 | 92,9 TGTAE(M)SSILEER                    | 13 | 720,34 | 1438,66 |
| 22309 IPI00180404 | 80,3 | 80,3 VLESEQFLTELTR                      | 14 | 839,46 | 1676,90 |
| 14519 IPI00011696 | 94,4 | 94,4 TFNTSTGGLLLPSDTK                   | 16 | 826,43 | 1650,85 |
| 4213 IPI00745955  | 46,5 | 46,5 GPSSVEDIK                          | 9  | 466,24 | 930,47  |
| 8276 IPI00745955  | 49,1 | 49,1 KYEDICPSTHN(M)DVPNIK               | 18 | 726,34 | 2175,99 |
| 4790 IPI00550506  | 50,3 | 50,3 VGEVIVTK                           | 8  | 422,76 | 843,51  |
| 23037 IPI00296103 | 51,7 | 51,7 LNWLSVDFNNWK                       | 12 | 768,38 | 1534,75 |
| 4860 IPI00400873  | 45,1 | 45,1 (M)QIFVK                           | 6  | 391,22 | 780,42  |
| 9136 IPI00400873  | 61,3 | 61,3 HFSGLEEAVYR                        | 11 | 654,32 | 1306,63 |
| 10992 IPI00452091 | 49,1 | 49,1 LWNTLGVCK                          | 9  | 545,79 | 1089,56 |
| 18369 IPI00000684 | 95,8 | 95,8 ILLAELEQLK                         | 10 | 585,36 | 1168,71 |
| 12822 IPI00045512 | 46,7 | 46,7 QVQSLTCEVDALK                      | 13 | 745,88 | 1489,74 |
| 29877 IPI00045512 | 83,3 | 83,3 FQSSAV(M)ALQEASEAYLVGLFEDTNLCAIHAK | 32 | 883,18 | 3528,68 |
| 22912 IPI00005631 | 88,8 | 88,8 VIHDNFGIVEGL(M)TTVHAITATQK         | 24 | 653,59 | 2610,35 |
| 17882 IPI00005631 | 60,6 | 60,6 LNCQVIGASVDSHFCHLAWVNTPK           | 24 | 689,09 | 2752,32 |
| 9584 IPI00029521  | 52   | 52 IEVEKPFAIAK                          | 11 | 622,87 | 1243,72 |
| 23287 IPI00292975 | 97,3 | 97,3 GVDEATIIDILTK                      | 13 | 694,39 | 1386,76 |
| 9396 IPI00024733  | 42,4 | 42,4 LFEELGK                            | 7  | 418,23 | 834,45  |
| 5645 IPI00016633  | 73,6 | 73,6 VLEG(M)EVVR                        | 9  | 524,28 | 1046,54 |
| 19152 IPI00294065 | 81,2 | 81,2 DELHIVEAEA(M)NYEGSPIK              | 19 | 721,01 | 2160,00 |
| 13359 IPI00382872 | 48,9 | 48,9 IELLSYDPQK                         | 11 | 631,83 | 1261,65 |
| 14807 IPI00031960 | 29,7 | 29,7 SYSPYD(M)LESIR                     | 12 | 738,84 | 1475,66 |
| 14229 IPI00029705 | 89   | 89 (N)GLSLAALK                          | 9  | 444,26 | 886,51  |
| 12399 IPI00329536 | 58,5 | 58,5 GLCAIAQAESLR                       | 12 | 644,84 | 1287,66 |
| 5250 IPI00009286  | 67,4 | 67,4 EG(M)NIVEA(M)ER                    | 11 | 655,79 | 1309,56 |
| 23064 IPI00794961 | 65,4 | 65,4 GV(M)LAVDAVIAELK                   | 14 | 722,91 | 1443,80 |
| 9896 IPI00788598  | 56,4 | 56,4 ISGLIYEETR                         | 10 | 590,81 | 1179,61 |
| 21687 IPI00215613 | 59,5 | 59,5 SDPLLIGIPTSENPFK                   | 16 | 864,46 | 1726,91 |
| 8566 IPI00760877  | 83,7 | 83,7 GISQEQMNEFR                        | 11 | 669,81 | 1337,60 |
| 25447 IPI00382531 | 54,6 | 54,6 LDINLLDNVNVNCLYHGEGAQQR            | 22 | 847,76 | 2540,25 |

|                   |      |                                         |    |         |         |
|-------------------|------|-----------------------------------------|----|---------|---------|
| 17804 IPI00017305 | 98,2 | 98,2 APVPTGEVYFADSFDR                   | 16 | 885,92  | 1769,82 |
| 10151 IPI00009906 | 37,6 | 37,6 SLLELAR                            | 7  | 401,25  | 800,48  |
| 12377 IPI00783732 | 55,2 | 55,2 GE(M)(M)DLQHGSFLQTPK               | 17 | 655,31  | 1962,92 |
| 12547 IPI00009439 | 47,2 | 47,2 TDLLLEPYNK                         | 10 | 603,32  | 1204,63 |
| 8254 IPI00255145  | 81,6 | 81,6 TGCNVLLIQK                         | 10 | 573,32  | 1144,63 |
| 15474 IPI00255145 | 46   | 46 VDQSILTGESVSVIK                      | 15 | 787,93  | 1573,85 |
| 16682 IPI00006091 | 30   | 30 TLFPLIEAK                            | 9  | 516,31  | 1030,61 |
| 9484 IPI00006091  | 36,9 | 36,9 VSGGLEVLAEK                        | 11 | 551,31  | 1100,61 |
| 26652 IPI00006091 | 78,7 | 78,7 NQLDQEVFLSTSIAQLK                  | 18 | 688,36  | 2062,06 |
| 12307 IPI00301517 | 96,5 | 96,5 VAAIEALNDGELQK                     | 14 | 735,89  | 1469,77 |
| 9264 IPI00397831  | 90,8 | 90,8 HVFGESDELIGQK                      | 13 | 486,91  | 1457,71 |
| 12812 IPI00018213 | 65,8 | 65,8 VEVTEFEDIK                         | 10 | 604,81  | 1207,60 |
| 14077 IPI00023977 | 38,7 | 38,7 DRPFFAGLVK                         | 10 | 575,32  | 1148,63 |
| 11459 IPI00020042 | 81,2 | 81,2 W(M)EEQAQSLIDK                     | 12 | 747,35  | 1492,69 |
| 13122 IPI00745230 | 51,9 | 51,9 MVVESAYEVIK                        | 11 | 634,33  | 1266,65 |
| 10124 IPI00748485 | 39,9 | 39,9 I(M)DPNIVGSEHYDVAR                 | 16 | 611,29  | 1830,86 |
| 17739 IPI00163337 | 56,6 | 56,6 FLQDYFDGNLK                        | 11 | 680,33  | 1358,65 |
| 19717 IPI00166749 | 92   | 92 (M)YGISLCQAILDETK                    | 15 | 879,43  | 1756,84 |
| 12334 IPI00739116 | 69,3 | 69,3 AGGIETIANEYS DR                    | 14 | 748,35  | 1494,69 |
| 22032 IPI00142538 | 59,2 | 59,2 AITIAGIPQSIIECVK                   | 16 | 856,98  | 1711,95 |
| 6180 IPI00456708  | 47,7 | 47,7 GQVLNIQ(M)R                        | 9  | 537,79  | 1073,56 |
| 15149 IPI00019981 | 69,5 | 69,5 SDIGEVILVGG(M)TR                   | 14 | 731,88  | 1461,75 |
| 19134 IPI00026320 | 80,1 | 80,1 VYEIQDIYENSWTK                     | 14 | 894,43  | 1786,84 |
| 22077 IPI00015135 | 77,3 | 77,3 LICCDILDVLDK                       | 12 | 738,88  | 1475,74 |
| 8954 IPI00257450  | 78   | 78 KQELLEALTK                           | 10 | 586,85  | 1171,68 |
| 10994 IPI00013272 | 73,8 | 73,8 GSGIFDESTPVQTR                     | 14 | 747,36  | 1492,72 |
| 9674 IPI00382504  | 68,7 | 68,7 ISGLIYEETR                         | 10 | 590,81  | 1179,61 |
| 21127 IPI00219100 | 85,4 | 85,4 HIADLAGNSEVILPVPAFNVI(N)GGSHAGNK   | 30 | 1004,85 | 3011,54 |
| 21989 IPI00219100 | 59,3 | 59,3 HIADLAG(N)SEVILPVPAFNVI(N)GGSHAGNK | 30 | 1005,18 | 3012,53 |
| 13174 IPI00170593 | 63,5 | 63,5 ITPSYVAFTPEGER                     | 14 | 783,89  | 1565,77 |

|                   |      |                               |    |        |         |
|-------------------|------|-------------------------------|----|--------|---------|
| 17667 IPI00011245 | 58   | 58 SEIDLFNIR                  | 9  | 553,80 | 1105,58 |
| 23307 IPI00031411 | 60   | 60 TLATDIL(M)GVLK             | 12 | 645,87 | 1289,73 |
| 13662 IPI00736070 | 67,3 | 67,3 LLCGLLAER                | 9  | 522,80 | 1043,58 |
| 6450 IPI00783299  | 46,3 | 46,3 TEWLDGK                  | 7  | 424,71 | 847,41  |
| 21104 IPI00465461 | 35,7 | 35,7 EAEAAIYHLQLFEELR         | 16 | 644,67 | 1930,98 |
| 21269 IPI00215851 | 74,9 | 74,9 NSNILEDLETLR             | 12 | 708,87 | 1415,73 |
| 11569 IPI00032905 | 67,2 | 67,2 IEVIEI(M)TDR             | 10 | 617,82 | 1233,63 |
| 13327 IPI00328911 | 69,9 | 69,9 LDVQFSGGTK               | 10 | 554,31 | 1106,60 |
| 10184 IPI00291262 | 64,8 | 64,8 ITLDNAYMEK               | 10 | 599,29 | 1196,57 |
| 10209 IPI00251344 | 72,6 | 72,6 IL(M)VGLDAAGK            | 11 | 552,31 | 1102,61 |
| 15267 IPI00171844 | 78,8 | 78,8 NLEPEWAAAASEVK           | 14 | 757,88 | 1513,74 |
| 11562 IPI00024766 | 75   | 75 SQVVAGTNYFIK               | 12 | 663,86 | 1325,70 |
| 21129 IPI00384873 | 42,3 | 42,3 TVLIMELI(N)NVAK          | 13 | 729,91 | 1457,81 |
| 21129 IPI00384873 | 42,3 | 42,3 TVLIMELIN(N)VAK          | 13 | 729,91 | 1457,81 |
| 23757 IPI00783464 | 30,5 | 30,5 YLQDLLAWVEENQHR          | 15 | 638,66 | 1912,95 |
| 22802 IPI00026089 | 65,7 | 65,7 DLPLLLFR                 | 8  | 493,81 | 985,60  |
| 11342 IPI00217642 | 65,8 | 65,8 HWPFQVINDGDKPK           | 14 | 560,95 | 1679,84 |
| 19607 IPI00008943 | 90,8 | 90,8 NNQFQALLQYADPVSAQHAK     | 20 | 748,38 | 2242,11 |
| 19784 IPI00217225 | 77,9 | 77,9 A(M)GI(M)NSFVNDIFER      | 15 | 888,41 | 1774,80 |
| 13919 IPI00787048 | 33,1 | 33,1 ADLTEYLSSTHYK            | 12 | 480,90 | 1439,69 |
| 17909 IPI00787048 | 57   | 57 WSSLACNIALDAVK             | 14 | 774,40 | 1546,78 |
| 13867 IPI00787048 | 31,3 | 31,3 IIPGF(M)CQGGDFTR         | 14 | 807,87 | 1613,73 |
| 22192 IPI00022229 | 86,8 | 86,8 GVDEVTIVNILTNR           | 14 | 514,95 | 1541,84 |
| 11682 IPI00008455 | 45,1 | 45,1 YNILGTNTI(M)DK           | 12 | 699,85 | 1397,69 |
| 16599 IPI00217398 | 61,7 | 61,7 DFNLYLVR                 | 8  | 513,27 | 1024,53 |
| 11319 IPI00400902 | 86,3 | 86,3 GLQQNSDWYLYK             | 12 | 740,36 | 1478,71 |
| 14462 IPI00235481 | 55,5 | 55,5 GLDPYNVLAPK              | 11 | 593,83 | 1185,64 |
| 10482 IPI00384826 | 29,4 | 29,4 TEVNSGFFYK               | 10 | 596,29 | 1190,56 |
| 23707 IPI00384826 | 36,3 | 36,3 HGGEDYVFSLLTGYCEPPTGVSLR | 24 | 885,42 | 2653,25 |
| 7674 IPI00444012  | 70,6 | 70,6 KESYSIYVYK               | 10 | 640,33 | 1278,65 |



|       |             |      |      |                          |    |        |         |
|-------|-------------|------|------|--------------------------|----|--------|---------|
| 17354 | IPI00304742 | 34   | 34   | VEAVNMAEGIIHDTETK        | 17 | 619,64 | 1855,90 |
| 12162 | IPI00337643 | 31,3 | 31,3 | ELLAVPDNYK               | 10 | 581,31 | 1160,61 |
| 10004 | IPI00376689 | 71,1 | 71,1 | VLSIGDGIAR               | 10 | 500,79 | 999,57  |
| 17399 | IPI00219179 | 62,3 | 62,3 | TAVETAVLLLR              | 11 | 593,36 | 1184,71 |
| 25904 | IPI00014952 | 54,8 | 54,8 | LQLETEIEALKEELLF(M)K     | 18 | 731,73 | 2192,16 |
| 6887  | IPI00329088 | 79,1 | 79,1 | AEAESMYQIK               | 10 | 585,28 | 1168,54 |
| 11867 | IPI00015756 | 84,8 | 84,8 | GALQNIPASTGAAK           | 15 | 706,40 | 1410,78 |
| 24114 | IPI00168769 | 86,7 | 86,7 | MGIMNSFVNDIFER           | 14 | 836,89 | 1671,77 |
| 11452 | IPI00790321 | 54,3 | 54,3 | (N)GFVVLK                | 7  | 389,23 | 776,44  |
| 18827 | IPI00790321 | 68   | 68   | LGGSP TSLGTWGSWIGPDHDK   | 21 | 723,35 | 2167,03 |
| 16119 | IPI00152635 | 30,7 | 30,7 | YLTAEAFGFK               | 10 | 573,79 | 1145,58 |
| 13219 | IPI00009379 | 79,2 | 79,2 | IESLSSQLSNLQK            | 13 | 723,89 | 1445,77 |
| 25899 | IPI00252570 | 58,3 | 58,3 | NLSPVVSNELLEQAQFSQFGPVEK | 23 | 844,77 | 2531,28 |
| 23217 | IPI00553066 | 86,5 | 86,5 | GIMNSFVNDIFER            | 13 | 771,37 | 1540,73 |
| 24207 | IPI00375843 | 42,1 | 42,1 | DALSDLALHFLNK            | 13 | 486,26 | 1455,77 |
| 9406  | IPI00008453 | 32,6 | 32,6 | YGVNPGPIVGTTR            | 13 | 665,86 | 1329,70 |
| 14007 | IPI00008057 | 73,1 | 73,1 | FSGWYDADLSPAGHEEAK       | 18 | 660,63 | 1978,87 |
| 9456  | IPI00184090 | 52,2 | 52,2 | GEFGGFGSVSGK             | 12 | 564,77 | 1127,52 |
| 22909 | IPI00031627 | 38,6 | 38,6 | EKPYFPIPEEYTFIQNVPLEDR   | 22 | 908,79 | 2723,35 |
| 7190  | IPI00060628 | 46,6 | 46,6 | NIYSEELR                 | 8  | 512,26 | 1022,50 |
| 9279  | IPI00033009 | 49,5 | 49,5 | VGSLDNVGHLPAGGAVK        | 17 | 530,96 | 1589,85 |
| 17474 | IPI00384861 | 74,2 | 74,2 | LHFF(M)PGFAPLTSR         | 14 | 546,28 | 1635,82 |
| 16209 | IPI00295638 | 92,9 | 92,9 | WELLQQVDTSTR             | 12 | 738,38 | 1474,74 |
| 5907  | IPI00215689 | 33,7 | 33,7 | DAG(M)QLQGYR             | 10 | 577,77 | 1153,52 |
| 5527  | IPI00025879 | 52,1 | 52,1 | LQSQVLQA(M)R             | 10 | 595,32 | 1188,63 |
| 14847 | IPI00797099 | 79,4 | 79,4 | IDSLSAQLSQLQK            | 13 | 715,90 | 1429,78 |
| 11382 | IPI00299702 | 96,8 | 96,8 | AQQVSQGLDVLTA            | 14 | 729,40 | 1456,79 |
| 14227 | IPI00181396 | 51,3 | 51,3 | VVDLLAPYAK               | 10 | 544,82 | 1087,63 |
| 17972 | IPI00297593 | 97,8 | 97,8 | YISPDQLADLYK             | 12 | 713,37 | 1424,72 |
| 17567 | IPI00746880 | 54,6 | 54,6 | IITLTGPTNAIFK            | 13 | 694,91 | 1387,81 |

|                   |      |                              |    |        |         |
|-------------------|------|------------------------------|----|--------|---------|
| 7454 IPI00033217  | 52,8 | 52,8 TPCEEILVK               | 9  | 544,79 | 1087,56 |
| 24289 IPI00167550 | 51   | 51 SFLLDLLNATGK              | 12 | 646,37 | 1290,72 |
| 10389 IPI00738217 | 81,2 | 81,2 SNEDQSMGNWQIK           | 13 | 768,84 | 1535,67 |
| 17944 IPI00300407 | 75,6 | 75,6 TTNFAGILSQGLR           | 13 | 689,38 | 1376,74 |
| 12754 IPI00394981 | 71,1 | 71,1 LFEGNALLR               | 9  | 516,80 | 1031,58 |
| 28582 IPI00221332 | 36,2 | 36,2 TLLEGGLESIIHSSLAEP      | 23 | 808,11 | 2421,31 |
| 20387 IPI00396627 | 67,4 | 67,4 TATESFASDPILYRPVAVALDTK | 23 | 822,44 | 2464,29 |
| 20517 IPI00171768 | 70,9 | 70,9 LAQDPFPLYPGEVLEK        | 16 | 908,48 | 1814,94 |
| 21034 IPI00001364 | 52,2 | 52,2 EANNFLWPFK              | 10 | 633,32 | 1264,62 |
| 14019 IPI00336016 | 62,5 | 62,5 EAFSLFDK                | 8  | 478,74 | 955,46  |
| 14237 IPI00735356 | 90,8 | 90,8 NCIVLIDSTPYR            | 12 | 725,87 | 1449,73 |
| 19132 IPI00737961 | 73,7 | 73,7 VCIESEHSMDTLLATLK       | 17 | 649,66 | 1945,95 |
| 15622 IPI00008332 | 69,4 | 69,4 YPIEHGIITNWDDMEK        | 16 | 980,96 | 1959,90 |
| 7441 IPI00337694  | 37,9 | 37,9 DTAAWTVGR               | 9  | 488,75 | 975,48  |
| 11187 IPI00377045 | 93,8 | 93,8 LWEEQLAAAK              | 10 | 579,81 | 1157,61 |
| 9679 IPI00009315  | 79,3 | 79,3 PYQYPALTPEQK            | 12 | 717,87 | 1433,72 |
| 14714 IPI00295503 | 36,9 | 36,9 LQFHVDVAGDIFHQQCK       | 16 | 486,49 | 1941,91 |
| 18384 IPI00744166 | 60,2 | 60,2 VVIG(M)DVAASEFFR        | 14 | 778,89 | 1555,77 |
| 16222 IPI00791410 | 56,5 | 56,5 WQHDLFDSGFGGGAGVETGGK   | 21 | 707,99 | 2120,95 |
| 7135 IPI00787295  | 55   | 55 ICEPGYSPTYK               | 11 | 657,80 | 1313,60 |

## Suppl Table 5: May High LET Peptides

| Scan# | IPI0000000# | Score# | Top score | Sequence                             | Pep.Length | m/z     | Neutral mass (exp) |
|-------|-------------|--------|-----------|--------------------------------------|------------|---------|--------------------|
| 7153  | IPI00418471 | 53,9   | 53,9      | FADLSEAANR                           | 10         | 547,27  | 1092,52            |
| 12294 | IPI00418471 | 78,9   | 78,9      | EYQDLLNVK                            | 9          | 561,30  | 1120,58            |
| 18660 | IPI00418471 | 95,8   | 95,8      | ILLAELEQLK                           | 10         | 585,36  | 1168,71            |
| 9014  | IPI00418471 | 90,6   | 90,6      | EEAENTLQSFR                          | 11         | 662,31  | 1322,61            |
| 19562 | IPI00418471 | 93,3   | 93,3      | VESLQEEIAFLK                         | 12         | 469,26  | 1404,75            |
| 8639  | IPI00418471 | 82,4   | 82,4      | SLYASSPGGVYATR                       | 14         | 714,86  | 1427,70            |
| 13089 | IPI00418471 | 31,4   | 31,4      | QVQSLTCEVDALK                        | 13         | 745,88  | 1489,74            |
| 16395 | IPI00418471 | 95,9   | 95,9      | KVESLQEEIAFLK                        | 13         | 511,96  | 1532,84            |
| 24205 | IPI00418471 | 88,8   | 88,8      | ISLPLPNFSSLNLR                       | 14         | 785,95  | 1569,89            |
| 25247 | IPI00418471 | 66,7   | 66,7      | ISLPLP(N)FSSLNLR                     | 14         | 786,44  | 1570,87            |
| 13014 | IPI00418471 | 97,5   | 97,5      | ETNLDSLPLVDTHSK                      | 15         | 834,93  | 1667,84            |
| 17125 | IPI00418471 | 98     | 98        | E(M)EENFAVEAANYQDTIGR                | 19         | 1101,98 | 2201,95            |
| 23270 | IPI00418471 | 64,6   | 64,6      | LHEEEIQELQAQIQEQHVQIDVDVSKPDLTAALR   | 34         | 981,51  | 3922,00            |
| 23455 | IPI00418471 | 34,1   | 34,1      | LHEEEIQELQA(Q)IQEQHVQIDVDVSKPDLTAALR | 34         | 981,76  | 3923,01            |
| 4222  | IPI00472102 | 38,7   | 38,7      | GANPVEIR                             | 8          | 428,24  | 854,46             |
| 8011  | IPI00472102 | 89,6   | 89,6      | VGLQVVAVK                            | 9          | 456,80  | 911,58             |
| 10496 | IPI00472102 | 46,5   | 46,5      | EIGNIISDA(M)K                        | 11         | 603,81  | 1205,60            |
| 24262 | IPI00472102 | 35,6   | 35,6      | GV(M)LAVDAVIAELK                     | 14         | 722,91  | 1443,80            |
| 18507 | IPI00472102 | 86,5   | 86,5      | AAVEEGIVLGGGCALLR                    | 17         | 842,96  | 1683,90            |
| 19355 | IPI00472102 | 93,2   | 93,2      | ISSIQSIVPALEIANAHR                   | 18         | 640,36  | 1918,06            |
| 19965 | IPI00472102 | 92     | 92        | ISSIQSIVPALEIA(N)AHR                 | 18         | 640,69  | 1919,05            |
| 20270 | IPI00472102 | 97,5   | 97,5      | IQEIEQLDVTTSEYEK                     | 17         | 1019,52 | 2037,02            |
| 26805 | IPI00472102 | 91,4   | 91,4      | AL(M)LQGVDLLADAVAVT(M)GPK            | 21         | 715,71  | 2144,12            |
| 14857 | IPI00472102 | 30,9   | 30,9      | QSKPVTTPPEEIAQVATISA(N)GDK           | 23         | 795,74  | 2384,21            |
| 34443 | IPI00472102 | 59     | 59        | TALLDAAGVASLLTTAEVVVTEIPK            | 25         | 828,14  | 2481,39            |
| 32048 | IPI00472102 | 80,5   | 80,5      | TALLDAAGVASLLTTAEVVVTEIPKEEK         | 28         | 956,86  | 2867,57            |
| 14334 | IPI00479186 | 56,4   | 56,4      | GIFPVLCK                             | 8          | 467,26  | 932,52             |
| 5328  | IPI00479186 | 73,7   | 73,7      | VNFA(M)NVGK                          | 9          | 498,25  | 994,49             |
| 12914 | IPI00479186 | 79,6   | 79,6      | GDLGIEIPA EK                         | 11         | 571,31  | 1140,60            |

|                   |      |                               |    |        |         |
|-------------------|------|-------------------------------|----|--------|---------|
| 11779 IPI00479186 | 38,5 | 38,5 LDIDSPITAR               | 11 | 599,33 | 1196,64 |
| 7566 IPI00479186  | 91,7 | 91,7 ITLDNAY(M)EK             | 10 | 607,29 | 1212,57 |
| 9484 IPI00479186  | 69,6 | 69,6 NTGIICTIGPASR            | 13 | 680,36 | 1358,70 |
| 19415 IPI00479186 | 91,5 | 91,5 IYVDDGLISLQVK            | 13 | 731,91 | 1461,81 |
| 16935 IPI00479186 | 76,3 | 76,3 GVNLPGAAVDLPAVSEK        | 17 | 818,95 | 1635,88 |
| 13924 IPI00479186 | 76,3 | 76,3 KGVNLPGAAVDLPAVSEK       | 18 | 589,00 | 1763,98 |
| 19570 IPI00479186 | 78,5 | 78,5 GADFLVTEVE(N)GGSLGSK     | 18 | 890,93 | 1779,85 |
| 28070 IPI00479186 | 74,2 | 74,2 FGVEQDVD(M)VFAFIR        | 16 | 625,97 | 1874,89 |
| 21717 IPI00479186 | 38,1 | 38,1 EAEAAIYHLQLFEELR         | 16 | 644,67 | 1930,98 |
| 21927 IPI00479186 | 58,9 | 58,9 LAPITSDPTEATAVGAVEASF    | 22 | 725,71 | 2174,11 |
| 20900 IPI00479186 | 68,9 | 68,9 TATESFASDPILYRPVAVALDTK  | 23 | 822,44 | 2464,29 |
| 4150 IPI00021439  | 75,7 | 75,7 AGFAGDDAPR               | 10 | 488,73 | 975,44  |
| 14650 IPI00021439 | 56,2 | 56,2 DLTDYL(M)K               | 8  | 507,74 | 1013,47 |
| 6456 IPI00021439  | 81,8 | 81,8 GYSFTTTAER               | 10 | 566,77 | 1131,52 |
| 6253 IPI00021439  | 66,7 | 66,7 EITALAPST(M)K            | 11 | 589,31 | 1176,60 |
| 7743 IPI00021439  | 68,8 | 68,8 IWHHTFYNELR              | 11 | 505,92 | 1514,74 |
| 18650 IPI00021439 | 99,8 | 99,8 SYELPDGQVITIGNER         | 16 | 895,95 | 1789,88 |
| 19595 IPI00021439 | 55,1 | 55,1 SYELPDGQVITIG(N)ER       | 16 | 896,44 | 1790,87 |
| 13439 IPI00021439 | 46,9 | 46,9 YPIEHGIVTNWDD(M)EK       | 16 | 654,97 | 1961,88 |
| 19352 IPI00021439 | 95,6 | 95,6 DLYANTVLSGGTT(M)YPGIADR  | 21 | 744,36 | 2230,06 |
| 15445 IPI00021439 | 50,7 | 50,7 KDLYANTVLSGGTT(M)YPGIADR | 22 | 787,06 | 2358,15 |
| 6203 IPI00465248  | 48,8 | 48,8 SCNCLLLK                 | 8  | 504,25 | 1006,49 |
| 4755 IPI00465248  | 64,7 | 64,7 L(M)IE(M)DGTENK          | 11 | 656,79 | 1311,57 |
| 15380 IPI00465248 | 79   | 79 GNPTVEVDLFTSK              | 13 | 703,86 | 1405,71 |
| 18385 IPI00465248 | 97,8 | 97,8 YISPDQLADLYK             | 12 | 713,37 | 1424,72 |
| 19087 IPI00465248 | 78,4 | 78,4 VVIG(M)DVAASEFFR         | 14 | 778,89 | 1555,77 |
| 11274 IPI00465248 | 90,3 | 90,3 VNQIGSVTESLQACK          | 15 | 817,41 | 1632,81 |
| 13291 IPI00465248 | 92,2 | 92,2 V(N)QIGSVTESLQACK        | 15 | 817,91 | 1633,80 |
| 13291 IPI00465248 | 92,2 | 92,2 VN(Q)IGSVTESLQACK        | 15 | 817,91 | 1633,80 |
| 19220 IPI00465248 | 96,8 | 96,8 AAVPSGASTGIYEALRL        | 18 | 602,32 | 1803,94 |

|       |             |      |      |                                    |    |         |         |
|-------|-------------|------|------|------------------------------------|----|---------|---------|
| 21692 | IPI00465248 | 63,6 | 63,6 | HIADLAGNSEVILPVPAFNVI(N)GGSHAGNK   | 30 | 1004,85 | 3011,54 |
| 21705 | IPI00465248 | 60,4 | 60,4 | HIADLAGNSEVILPVPAF(N)VINGGSHAGNK   | 30 | 753,89  | 3011,54 |
| 22765 | IPI00465248 | 45,8 | 45,8 | HIADLAG(N)SEVILPVPAF(N)VINGGSHAGNK | 30 | 754,14  | 3012,53 |
| 22765 | IPI00465248 | 45,8 | 45,8 | HIADLAG(N)SEVILPVPAFNVI(N)GGSHAGNK | 30 | 754,14  | 3012,53 |
| 7198  | IPI00302592 | 29,3 | 29,3 | TPCEEILVK                          | 9  | 544,79  | 1087,56 |
| 13624 | IPI00302592 | 85,8 | 85,8 | LDVQFSGGTK                         | 10 | 554,31  | 1106,60 |
| 9796  | IPI00302592 | 29,9 | 29,9 | (N)GHVGISFVPK                      | 11 | 578,31  | 1154,61 |
| 23560 | IPI00302592 | 89,7 | 89,7 | LIALLEVLSQK                        | 11 | 613,89  | 1225,76 |
| 8611  | IPI00302592 | 40,4 | 40,4 | VTVLFAGQHIAK                       | 12 | 428,59  | 1282,74 |
| 8951  | IPI00302592 | 45,7 | 45,7 | YGGQVPNFPSPK                       | 12 | 645,83  | 1289,64 |
| 15577 | IPI00302592 | 34,3 | 34,3 | YGGDEIPFSPYR                       | 12 | 700,83  | 1399,64 |
| 14624 | IPI00302592 | 92,6 | 92,6 | IANLQTDLSGLR                       | 13 | 708,38  | 1414,74 |
| 11061 | IPI00302592 | 78,9 | 78,9 | EAGAGGLAIAVEGPSK                   | 16 | 713,88  | 1425,75 |
| 10449 | IPI00302592 | 64,7 | 64,7 | ANLPQSFQVDTSK                      | 13 | 717,86  | 1433,72 |
| 6916  | IPI00302592 | 63,3 | 63,3 | AGNN(M)LLVGVHGPR                   | 14 | 484,26  | 1449,75 |
| 12716 | IPI00302592 | 59,8 | 59,8 | VNQPASFAVSL(N)GAK                  | 15 | 752,39  | 1502,77 |
| 10709 | IPI00302592 | 35   | 35   | FADQHVPGPSFVSK                     | 14 | 505,92  | 1514,75 |
| 5653  | IPI00302592 | 64,7 | 64,7 | FVPAE(M)GTHTVSVK                   | 14 | 759,88  | 1517,75 |
| 18152 | IPI00302592 | 86,3 | 86,3 | SPFSVAVSPSLDLSK                    | 15 | 767,41  | 1532,81 |
| 10529 | IPI00302592 | 80,5 | 80,5 | GAGTGGLGLAVEGPSEAK                 | 18 | 785,91  | 1569,80 |
| 7676  | IPI00302592 | 50,1 | 50,1 | YNEQHVPGPSFTAR                     | 14 | 534,93  | 1601,76 |
| 17627 | IPI00302592 | 39,8 | 39,8 | VTYTP(M)APGSYLISIK                 | 16 | 878,96  | 1755,91 |
| 17075 | IPI00302592 | 65,8 | 65,8 | VTYCPTEPGNYIINIK                   | 16 | 941,47  | 1880,93 |
| 13126 | IPI00302592 | 33,6 | 33,6 | LVSNHSLHETSSVFVDSLTK               | 20 | 734,05  | 2199,12 |
| 13839 | IPI00302592 | 75,3 | 75,3 | VHSPSGALEECYVTEIDQDK               | 20 | 759,68  | 2276,03 |
| 16187 | IPI00302592 | 77,6 | 77,6 | YTPVQQGPVGVNVTYGGDPIPK             | 22 | 1143,59 | 2285,17 |
| 14910 | IPI00302592 | 40,4 | 40,4 | GQHVPGPSFQFTVGPLGEGGAHK            | 23 | 576,79  | 2303,14 |
| 12969 | IPI00302592 | 36,9 | 36,9 | SAGQGEVLVYVEDPAGHQEEAK             | 22 | 771,70  | 2312,09 |
| 18740 | IPI00302592 | 47,7 | 47,7 | FNEEHIPDSPFVVPVASPSGDAR            | 23 | 823,07  | 2466,18 |
| 19835 | IPI00302592 | 50,8 | 50,8 | LQVEPAVDTSQVQCYGPGIEGQGVFR         | 26 | 921,79  | 2762,33 |

|       |             |      |      |                                    |    |         |         |
|-------|-------------|------|------|------------------------------------|----|---------|---------|
| 19800 | IPI00302592 | 52,7 | 52,7 | FGGEHVPNSPFQVTALAGDQPSVQPPLR       | 28 | 982,50  | 2944,48 |
| 23475 | IPI00302592 | 74,8 | 74,8 | EEGPYEVEVTYDGVVPVPGSPFPLEAVAPTKPSK | 33 | 1162,58 | 3484,73 |
| 14925 | IPI00003865 | 47,1 | 47,1 | FELTGIPPAPR                        | 11 | 599,33  | 1196,66 |
| 16335 | IPI00003865 | 91,9 | 91,9 | DAGTIAGLNVLR                       | 12 | 600,34  | 1198,67 |
| 5142  | IPI00003865 | 53,6 | 53,6 | VEIANDQGNR                         | 11 | 614,82  | 1227,62 |
| 8241  | IPI00003865 | 59,8 | 59,8 | (M)VNHFIAEFK                       | 10 | 626,31  | 1250,61 |
| 17502 | IPI00003865 | 77,4 | 77,4 | FEELNADLFR                         | 10 | 627,31  | 1252,61 |
| 5930  | IPI00003865 | 91   | 91   | FDDAVVQSD(M)K                      | 11 | 635,78  | 1269,55 |
| 9006  | IPI00003865 | 99,6 | 99,6 | SQIHDIVLVGGSTR                     | 14 | 741,41  | 1480,80 |
| 11241 | IPI00003865 | 99,8 | 99,8 | TTPSYVAFTDTER                      | 13 | 744,35  | 1486,69 |
| 15862 | IPI00003865 | 31,5 | 31,5 | SFYPEEVSS(M)VLTk                   | 14 | 816,90  | 1631,78 |
| 17130 | IPI00003865 | 55,1 | 55,1 | IINEPTAAAIA YGLDK                  | 16 | 553,97  | 1658,89 |
| 16685 | IPI00003865 | 64,2 | 64,2 | TVTNAVVTVPAYFNDSQR                 | 18 | 991,50  | 1980,99 |
| 17730 | IPI00003865 | 45,4 | 45,4 | TVTNAVVTVPAYF(N)DSQR               | 18 | 991,99  | 1981,97 |
| 17730 | IPI00003865 | 45,4 | 45,4 | TVTNAVVTVPAYFNDS(Q)R               | 18 | 991,99  | 1981,97 |
| 25660 | IPI00003865 | 89   | 89   | SINPDEAVAYGAAVQAAILSGDK            | 23 | 754,05  | 2259,14 |
| 18295 | IPI00003865 | 75,5 | 75,5 | GPAVGIDLGTTYSCVGVFQH GK            | 22 | 755,04  | 2262,11 |
| 14041 | IPI00334775 | 32,3 | 32,3 | ALLFIPR                            | 7  | 415,27  | 828,52  |
| 16390 | IPI00334775 | 74,3 | 74,3 | APFDLFENK                          | 9  | 540,77  | 1079,53 |
| 8251  | IPI00334775 | 50,9 | 50,9 | SIYYITGESK                         | 10 | 580,79  | 1159,58 |
| 11579 | IPI00334775 | 52,3 | 52,3 | IDIIPNPQER                         | 10 | 597,83  | 1193,64 |
| 13824 | IPI00334775 | 45,5 | 45,5 | RAPFDLFENK                         | 10 | 618,82  | 1235,63 |
| 14449 | IPI00334775 | 89,7 | 89,7 | ADLI(N)NLGTIAK                     | 12 | 622,35  | 1242,68 |
| 11729 | IPI00334775 | 91,6 | 91,6 | HLEINPDHPIVETLR                    | 15 | 891,98  | 1781,94 |
| 19842 | IPI00334775 | 99,6 | 99,6 | HSQFIGYPITLYLEK                    | 15 | 904,98  | 1807,95 |
| 27222 | IPI00334775 | 66,4 | 66,4 | VFI(M)DSCDELIPEYLN FIR             | 19 | 1195,57 | 2389,13 |
| 20772 | IPI00334775 | 76,8 | 76,8 | GFEVVY(M)TEPIDEYCVQQLK             | 20 | 1232,57 | 2463,13 |
| 13209 | IPI00418169 | 74   | 74   | DALNIETAIK                         | 10 | 544,30  | 1086,59 |
| 9239  | IPI00418169 | 54,4 | 54,4 | QDIAFAYQR                          | 9  | 556,28  | 1110,55 |
| 15112 | IPI00418169 | 91,9 | 91,9 | SYSPYD(M)LESIR                     | 12 | 738,84  | 1475,66 |

|       |             |      |      |                                  |    |         |         |
|-------|-------------|------|------|----------------------------------|----|---------|---------|
| 23052 | IPI00418169 | 30,7 | 30,7 | GVDEVTIVNILTNR                   | 14 | 514,95  | 1541,84 |
| 25435 | IPI00418169 | 96   | 96   | SALSGHLETVILGLLK                 | 16 | 551,00  | 1649,97 |
| 23515 | IPI00418169 | 78,2 | 78,2 | GLGTDEDSLIEIICSR                 | 16 | 889,43  | 1776,86 |
| 9189  | IPI00418169 | 80,5 | 80,5 | LSLEGDHSTPPSAYGSVK               | 18 | 615,64  | 1843,89 |
| 15550 | IPI00418169 | 44,3 | 44,3 | RAEDGSVIDYELIDQDAR               | 18 | 689,00  | 2063,98 |
| 30138 | IPI00418169 | 81,1 | 81,1 | GDLENAFLNLVQCIQNKPLYFADR         | 24 | 710,36  | 2837,41 |
| 30108 | IPI00418169 | 51,5 | 51,5 | GDLENAFLNLV(Q)CIQNKPLYFADR       | 24 | 710,61  | 2838,41 |
| 9514  | IPI00396485 | 66,5 | 66,5 | LPLQDVYK                         | 8  | 488,28  | 974,54  |
| 12746 | IPI00396485 | 66,8 | 66,8 | EHALLAYTLGVK                     | 12 | 438,92  | 1313,73 |
| 10616 | IPI00396485 | 83,3 | 83,3 | YYVTIIDAPGHR                     | 12 | 702,87  | 1403,72 |
| 20130 | IPI00396485 | 65,7 | 65,7 | VETGVLKPGMVVTFAPVNVTTTEVK        | 24 | 839,13  | 2514,38 |
| 18337 | IPI00396485 | 76,8 | 76,8 | VETGVLKPG(M)VVTFAPVNVTTTEVK      | 24 | 844,46  | 2530,37 |
| 25255 | IPI00396485 | 91,7 | 91,7 | DGNASGTTLLEALDCILPPTTRPTDKPLR    | 28 | 1007,86 | 3020,56 |
| 25812 | IPI00396485 | 51,5 | 51,5 | DG(N)ASGTTLLEALDCILPPTTRPTDKPLR  | 28 | 1008,19 | 3021,54 |
| 18732 | IPI00396485 | 43,3 | 43,3 | SGDAAIVD(M)VPGKP(M)CVESFSDYPPLGR | 28 | 1009,80 | 3026,38 |
| 22445 | IPI00396485 | 75,6 | 75,6 | KDGNASGTTLLEALDCILPPTTRPTDKPLR   | 29 | 788,17  | 3148,66 |
| 11869 | IPI00219018 | 93,3 | 93,3 | GALQNIIPASTGAAK                  | 15 | 706,40  | 1410,78 |
| 13961 | IPI00219018 | 56   | 56   | VPTANVSVDLTCR                    | 14 | 765,90  | 1529,79 |
| 20847 | IPI00219018 | 92,8 | 92,8 | LVINGNPITIFQER                   | 14 | 807,45  | 1612,89 |
| 21700 | IPI00219018 | 76,5 | 76,5 | LVING(N)PITIFQER                 | 14 | 538,97  | 1613,88 |
| 21737 | IPI00219018 | 99   | 99   | LVI(N)GNPITIFQER                 | 14 | 807,95  | 1613,88 |
| 19045 | IPI00219018 | 71,8 | 71,8 | LISWYDNEFGYSNR                   | 14 | 882,41  | 1762,80 |
| 11689 | IPI00219018 | 51,1 | 51,1 | IISNASCTT(N)CLAPLAK              | 17 | 917,95  | 1833,89 |
| 23650 | IPI00219018 | 77,1 | 77,1 | VIHDNFGIVEGL(M)TTVHAITATQK       | 24 | 653,59  | 2610,35 |
| 13954 | IPI00387144 | 57,5 | 57,5 | QLFHPEQLITGK                     | 12 | 470,93  | 1409,77 |
| 25145 | IPI00387144 | 81,6 | 81,6 | LISQIVSSITASLR                   | 14 | 744,44  | 1486,87 |
| 20655 | IPI00387144 | 72,2 | 72,2 | SIQFVDWCPTGFK                    | 13 | 792,88  | 1583,75 |
| 21510 | IPI00387144 | 55,2 | 55,2 | AVFVDLEPTVIDEVR                  | 15 | 567,97  | 1700,90 |
| 11104 | IPI00387144 | 44   | 44   | NLDIERPTYTNLNR                   | 14 | 859,94  | 1717,87 |
| 18032 | IPI00387144 | 84,1 | 84,1 | IHFPLATYAPVISA EK                | 16 | 878,99  | 1755,96 |



|       |             |      |      |                                      |    |         |         |
|-------|-------------|------|------|--------------------------------------|----|---------|---------|
| 16097 | IPI00387144 | 65,8 | 65,8 | VGINYQPPTVVPGGDLAK                   | 18 | 913,00  | 1823,98 |
| 19962 | IPI00387144 | 80,7 | 80,7 | TIGGGDDSFNTFFSETGAGK                 | 20 | 1004,45 | 2006,89 |
| 16565 | IPI00387144 | 45,3 | 45,3 | AYHEQLSVAEITNACFEPANQ(M)VK           | 24 | 922,76  | 2765,27 |
| 26907 | IPI00387144 | 43,6 | 43,6 | LAD(Q)CTGLQGFLVFHSFGGGTGSGFTSLL(M)ER | 32 | 1136,54 | 3406,61 |
| 15377 | IPI00011654 | 61,6 | 61,6 | YLTVA AVFR                           | 9  | 520,30  | 1038,59 |
| 10879 | IPI00011654 | 36   | 36   | FPGQLNADLR                           | 10 | 565,80  | 1129,59 |
| 7621  | IPI00011654 | 96,6 | 96,6 | ISVYYNEATGGK                         | 12 | 651,32  | 1300,63 |
| 15510 | IPI00011654 | 87,8 | 87,8 | AILVDLEPGT(M)DSVR                    | 15 | 816,42  | 1630,82 |
| 17605 | IPI00011654 | 84,8 | 84,8 | LHFF(M)PGFAPLTSR                     | 14 | 546,28  | 1635,82 |
| 21020 | IPI00011654 | 90,6 | 90,6 | ALTVPELTQQVFDK                       | 15 | 830,45  | 1658,89 |
| 23617 | IPI00011654 | 68,7 | 68,7 | (M)AVTFIGNSTAIQELFK                  | 17 | 943,49  | 1884,96 |
| 25860 | IPI00011654 | 32,2 | 32,2 | (M)AVTFIGNSTAIQELFK                  | 17 | 943,98  | 1885,95 |
| 25860 | IPI00011654 | 32,2 | 32,2 | (M)AVTFIGNSTAI(Q)ELFK                | 17 | 943,98  | 1885,95 |
| 23130 | IPI00011654 | 92,8 | 92,8 | GHYTEGAELVDSVLDVVR                   | 18 | 653,67  | 1957,97 |
| 21810 | IPI00011654 | 96,1 | 96,1 | LTTPTYGDLNHLVSAT(M)SGVTTCLR          | 25 | 908,78  | 2723,33 |
| 23462 | IPI00011654 | 30,4 | 30,4 | SGPFGQIFRPDNFVFGQSGAGNNWAK           | 26 | 933,45  | 2797,33 |
| 24272 | IPI00011654 | 41,7 | 41,7 | SGPFGQIFRPDNFVFGQSGAG(N)NWAK         | 26 | 933,78  | 2798,32 |
| 24242 | IPI00011654 | 30,8 | 30,8 | SGPFGQIFRPDNFVFG(Q)SGAGNNWAK         | 26 | 933,78  | 2798,32 |
| 6488  | IPI00019502 | 51,2 | 51,2 | SGFEPASLK                            | 9  | 468,24  | 934,48  |
| 10674 | IPI00019502 | 74,3 | 74,3 | RGDLPFVVPR                           | 10 | 578,34  | 1154,66 |
| 12749 | IPI00019502 | 43,5 | 43,5 | TDLLLEPYNK                           | 10 | 603,32  | 1204,63 |
| 9991  | IPI00019502 | 90,8 | 90,8 | VEAQLQELQVK                          | 11 | 642,86  | 1283,71 |
| 17072 | IPI00019502 | 72,9 | 72,9 | LDPHLVLDQLR                          | 11 | 440,25  | 1317,74 |
| 5290  | IPI00019502 | 83,5 | 83,5 | D(M)FQET(M)EA(M)R                    | 11 | 718,78  | 1435,54 |
| 23327 | IPI00019502 | 44,5 | 44,5 | VISGVLQLGNIVFK                       | 14 | 743,95  | 1485,89 |
| 10531 | IPI00019502 | 61   | 61   | IAQLEEQLDNETK                        | 13 | 765,89  | 1529,76 |
| 17015 | IPI00019502 | 88,9 | 88,9 | VSHLLGINVTDFTTR                      | 14 | 786,43  | 1570,85 |
| 18502 | IPI00019502 | 83,5 | 83,5 | NLPIYSEEIVE(M)YK                     | 14 | 872,43  | 1742,85 |
| 11626 | IPI00019502 | 83,5 | 83,5 | KQELEEICHDLER                        | 14 | 590,62  | 1768,84 |
| 9974  | IPI00019502 | 41,1 | 41,1 | KLEEEQIILEDQNCK                      | 15 | 630,32  | 1887,92 |

|       |             |      |      |                                 |    |         |         |
|-------|-------------|------|------|---------------------------------|----|---------|---------|
| 21565 | IPI00019502 | 72,8 | 72,8 | LQVELDNVTGLLSQSDSK              | 18 | 973,51  | 1945,00 |
| 22365 | IPI00019502 | 96,6 | 96,6 | LQQELDDLVDLDHQR                 | 16 | 650,67  | 1948,99 |
| 21400 | IPI00019502 | 86,4 | 86,4 | IIGLDQVAG(M)SETALPGAFK          | 20 | 1017,53 | 2033,05 |
| 17637 | IPI00019502 | 84   | 84   | VED(M)AELTCLNEASVLHNLK          | 20 | 768,04  | 2301,10 |
| 19615 | IPI00220740 | 45,7 | 45,7 | DELHIVEAEA(M)NYEGSPIK           | 19 | 721,01  | 2160,00 |
| 25070 | IPI00220740 | 82,6 | 82,6 | MSVQPTVSLGGFEITPPVVLR           | 21 | 1114,11 | 2226,21 |
| 24340 | IPI00220740 | 99,8 | 99,8 | (M)SVQPTVSLGGFEITPPVVLR         | 21 | 1122,11 | 2242,20 |
| 4517  | IPI00396378 | 57,7 | 57,7 | LTDCVV(M)R                      | 8  | 505,24  | 1008,47 |
| 6561  | IPI00396378 | 54,2 | 54,2 | GGNFGFGDSR                      | 10 | 507,23  | 1012,44 |
| 7211  | IPI00396378 | 85,5 | 85,5 | GGGNFGPGPGSNFR                  | 15 | 689,32  | 1376,62 |
| 8896  | IPI00396378 | 49,1 | 49,1 | GGGNFGPGPGS(N)FR                | 15 | 689,81  | 1377,61 |
| 17397 | IPI00396378 | 79,8 | 79,8 | GFGFVTFDDHDPVDK                 | 15 | 848,39  | 1694,76 |
| 16485 | IPI00419585 | 75,6 | 75,6 | VSFELFADK                       | 9  | 528,27  | 1054,53 |
| 14224 | IPI00419585 | 72,5 | 72,5 | FEDENFILK                       | 9  | 577,79  | 1153,57 |
| 15595 | IPI00419585 | 45,3 | 45,3 | FEDE(N)FILK                     | 9  | 578,28  | 1154,55 |
| 4895  | IPI00419585 | 77,6 | 77,6 | EG(M)NIVEA(M)ER                 | 11 | 655,79  | 1309,56 |
| 14164 | IPI00419585 | 43,4 | 43,4 | IIPGF(M)CQGGDFTR                | 14 | 807,87  | 1613,73 |
| 25632 | IPI00419585 | 90,2 | 90,2 | VNPTVFFDIAVDGEPLGR              | 18 | 973,51  | 1945,00 |
| 17340 | IPI00419585 | 79,8 | 79,8 | HTGPGILS(M)ANAGPNT(N)GSQFFICTAK | 27 | 936,77  | 2807,30 |
| 8284  | IPI00218918 | 45,7 | 45,7 | NALLSLAK                        | 8  | 415,26  | 828,51  |
| 9714  | IPI00218918 | 71,7 | 71,7 | TPAQFDADEL                      | 11 | 631,80  | 1261,59 |
| 20425 | IPI00218918 | 55,3 | 55,3 | GTDVNVFNTILTTR                  | 14 | 775,91  | 1549,81 |
| 26340 | IPI00218918 | 99,2 | 99,2 | ALTGHLEEVVLALLK                 | 15 | 535,99  | 1604,95 |
| 25205 | IPI00218918 | 99,7 | 99,7 | GLGTDEDTLIEILASR                | 16 | 851,95  | 1701,88 |
| 20260 | IPI00218918 | 51,3 | 51,3 | (M)YGISLCQAILDETK               | 15 | 879,43  | 1756,84 |
| 10841 | IPI00218918 | 43,2 | 43,2 | AAYLQETGKPLDETLK                | 16 | 592,98  | 1775,93 |
| 15750 | IPI00218918 | 96,9 | 96,9 | GGPGSAVSPYPTFNPSSDVAALHK        | 24 | 786,06  | 2355,15 |
| 7671  | IPI00007752 | 52,5 | 52,5 | INVYYNEATGGK                    | 12 | 664,83  | 1327,64 |
| 14061 | IPI00007752 | 60,5 | 60,5 | AVLVDLEPGT(M)DSVR               | 15 | 809,41  | 1616,81 |
| 9739  | IPI00478539 | 58,2 | 58,2 | DYFEQYGK                        | 8  | 525,23  | 1048,45 |

|       |             |      |      |                                 |    |        |         |
|-------|-------------|------|------|---------------------------------|----|--------|---------|
| 10486 | IPI00478539 | 36,4 | 36,4 | DYFE(Q)YGK                      | 8  | 525,72 | 1049,43 |
| 6903  | IPI00478539 | 65,5 | 65,5 | GTLTDCVV(M)R                    | 10 | 584,28 | 1166,54 |
| 16830 | IPI00478539 | 42,2 | 42,2 | GFAFVTFDDHDSVDK                 | 15 | 567,26 | 1698,75 |
| 22480 | IPI00478539 | 99,7 | 99,7 | LFIGGLSFETTDESLR                | 16 | 892,96 | 1783,90 |
| 5295  | IPI00216457 | 42,2 | 42,2 | HLQLAIR                         | 7  | 425,77 | 849,52  |
| 10254 | IPI00216457 | 66,8 | 66,8 | AGLQFPVGR                       | 9  | 472,77 | 943,52  |
| 24027 | IPI00216457 | 88,3 | 88,3 | VTIAQGGVLPNIQAVLLPK             | 19 | 644,39 | 1930,16 |
| 23657 | IPI00216457 | 45,3 | 45,3 | VTIAQGGVLP(N)IQAVLLPK           | 19 | 966,58 | 1931,15 |
| 23657 | IPI00216457 | 45,3 | 45,3 | VTIAQGGVLPNI(Q)AVLLPK           | 19 | 966,58 | 1931,15 |
| 34873 | IPI00216457 | 50,2 | 50,2 | VGAGAPVY(M)AAVLEYLTAEILELAGNAAR | 29 | 983,85 | 2948,52 |
| 16520 | IPI00003362 | 75,4 | 75,4 | FEELN(M)DLFR                    | 10 | 665,31 | 1328,61 |
| 16840 | IPI00003362 | 70,3 | 70,3 | ELEEIVQPIISK                    | 12 | 699,40 | 1396,78 |
| 13474 | IPI00003362 | 72,6 | 72,6 | ITPSYVAFTPEGER                  | 14 | 783,89 | 1565,77 |
| 12794 | IPI00003362 | 79,2 | 79,2 | SQIFSTASDNQPTVTIK               | 17 | 918,97 | 1835,93 |
| 12609 | IPI00003362 | 92   | 92   | VTHAVVTVPAYFNDAQR               | 17 | 630,00 | 1886,96 |
| 6366  | IPI00021263 | 31   | 31   | VFYLK                           | 5  | 335,20 | 668,39  |
| 9554  | IPI00021263 | 59,7 | 59,7 | NLLSVAYK                        | 8  | 454,27 | 906,52  |
| 23062 | IPI00021263 | 51,6 | 51,6 | DSTLIMQLLR                      | 10 | 595,33 | 1188,65 |
| 21070 | IPI00021263 | 87,7 | 87,7 | DSTLI(M)QLLR                    | 10 | 603,33 | 1204,65 |
| 10349 | IPI00021263 | 31,3 | 31,3 | FLIPNASQAESK                    | 12 | 652,85 | 1303,68 |
| 26242 | IPI00021263 | 61,2 | 61,2 | DICNDVLSLLEK                    | 12 | 473,58 | 1417,71 |
| 20090 | IPI00021263 | 90,5 | 90,5 | GIVDQSQQAYQEAFFEISK             | 18 | 681,00 | 2039,98 |
| 28072 | IPI00021263 | 73,3 | 73,3 | TAFDEAIAELDTLSEESYK             | 19 | 711,34 | 2130,99 |
| 7276  | IPI00024067 | 57,5 | 57,5 | HELIEFR                         | 7  | 472,25 | 942,49  |
| 9449  | IPI00024067 | 34,7 | 34,7 | YIEIYVQK                        | 8  | 528,29 | 1054,57 |
| 9411  | IPI00024067 | 66,7 | 66,7 | VANVELYYR                       | 9  | 563,80 | 1125,58 |
| 14815 | IPI00024067 | 68,2 | 68,2 | NNLAGAEELFAR                    | 12 | 652,83 | 1303,65 |
| 22590 | IPI00024067 | 76,4 | 76,4 | NLQNLLILTAIK                    | 12 | 677,43 | 1352,84 |
| 15770 | IPI00024067 | 51,8 | 51,8 | ALEHFTDLYDIK                    | 12 | 488,92 | 1463,73 |
| 7923  | IPI00024067 | 90,2 | 90,2 | HSSLAGCQIINYR                   | 13 | 759,88 | 1517,74 |

|       |             |      |      |                                  |    |         |         |
|-------|-------------|------|------|----------------------------------|----|---------|---------|
| 17522 | IPI00024067 | 88,2 | 88,2 | GQFSTDELVAEVEK                   | 14 | 776,38  | 1550,75 |
| 18692 | IPI00024067 | 88,1 | 88,1 | TSIDAYDNFDNISLAQR                | 17 | 971,96  | 1941,90 |
| 28697 | IPI00024067 | 77,9 | 77,9 | AF(M)TADLPNELIELLEK              | 17 | 655,01  | 1962,00 |
| 15270 | IPI00024067 | 72,5 | 72,5 | LASTLVHLGEYQAAVDGAR              | 19 | 657,68  | 1970,02 |
| 24675 | IPI00024067 | 88,4 | 88,4 | LPVVIGLLDVDCSEVVIK               | 19 | 1021,05 | 2040,09 |
| 27297 | IPI00024067 | 79,1 | 79,1 | YHEQLSTQSLIELFESFK               | 18 | 733,70  | 2198,09 |
| 18715 | IPI00024067 | 54,1 | 54,1 | ISGETIFVTAPHEATAGIIGVNR          | 23 | 785,09  | 2352,24 |
| 25310 | IPI00024067 | 76,5 | 76,5 | KFDVNTSAVQVLIHIGNLDR             | 21 | 592,82  | 2367,26 |
| 9214  | IPI00020101 | 54,3 | 54,3 | ESYSVYVYK                        | 9  | 569,28  | 1136,54 |
| 6311  | IPI00020101 | 90,4 | 90,4 | KESYSVYVYK                       | 10 | 633,32  | 1264,63 |
| 24130 | IPI00020101 | 52,7 | 52,7 | A(M)GIMNSFVNDIFER                | 15 | 880,41  | 1758,81 |
| 20370 | IPI00020101 | 93,1 | 93,1 | A(M)GI(M)NSFVNDIFER              | 15 | 888,41  | 1774,80 |
| 21075 | IPI00020101 | 93,1 | 93,1 | A(M)GI(M)(N)SFVNDIFER            | 15 | 888,90  | 1775,79 |
| 18475 | IPI00020101 | 72,9 | 72,9 | A(M)GI(M)NSFV(N)DIFER            | 15 | 888,90  | 1775,79 |
| 13561 | IPI00021428 | 41   | 41   | YPIEHGIITNWDD(M)EK               | 16 | 988,96  | 1975,90 |
| 11309 | IPI00303476 | 60,5 | 60,5 | IGLFGGAGVGK                      | 11 | 488,28  | 974,55  |
| 8789  | IPI00303476 | 45,5 | 45,5 | IPVGPETLGR                       | 10 | 519,80  | 1037,59 |
| 7663  | IPI00303476 | 36,2 | 36,2 | TIA(M)DGTEGLVR                   | 12 | 639,82  | 1277,63 |
| 10429 | IPI00303476 | 79   | 79   | I(M)NVIGEPIDER                   | 12 | 701,36  | 1400,70 |
| 16157 | IPI00303476 | 95,7 | 95,7 | FTQAGSEVSALLGR                   | 14 | 718,38  | 1434,75 |
| 21185 | IPI00303476 | 76,6 | 76,6 | VALTGLTVAEYFR                    | 13 | 720,40  | 1438,78 |
| 22227 | IPI00303476 | 79,7 | 79,7 | TVLI(M)ELINNVAK                  | 13 | 737,42  | 1472,83 |
| 17577 | IPI00303476 | 51,1 | 51,1 | TVLI(M)ELI(N)NVAK                | 13 | 737,91  | 1473,81 |
| 17577 | IPI00303476 | 51,1 | 51,1 | TVLI(M)ELIN(N)VAK                | 13 | 737,91  | 1473,81 |
| 21495 | IPI00303476 | 70,6 | 70,6 | AIAELGIYPAVDPLDSTSR              | 19 | 994,52  | 1987,03 |
| 26250 | IPI00303476 | 49,2 | 49,2 | GFQQILAGEYDHLPEQAFY(M)VGPIEEAVAK | 30 | 1122,88 | 3365,63 |
| 10984 | IPI00021405 | 95,9 | 95,9 | LADALQELR                        | 9  | 514,79  | 1027,57 |
| 10689 | IPI00021405 | 62,4 | 62,4 | LALD(M)EIHAYR                    | 11 | 449,90  | 1346,66 |
| 15170 | IPI00021405 | 89   | 89   | IDSLSAQLSQLQK                    | 13 | 715,90  | 1429,78 |
| 7946  | IPI00021405 | 75,3 | 75,3 | TALINSTGEEVA(M)R                 | 14 | 754,37  | 1506,73 |

|       |             |      |      |                                |    |         |         |
|-------|-------------|------|------|--------------------------------|----|---------|---------|
| 10239 | IPI00021405 | 52,1 | 52,1 | TALI(N)STGEEVA(M)R             | 14 | 754,87  | 1507,72 |
| 20767 | IPI00021405 | 65,2 | 65,2 | MQQQLDEYQELLDIK                | 15 | 947,47  | 1892,92 |
| 13984 | IPI00453473 | 68,1 | 68,1 | VFLENVIR                       | 8  | 495,29  | 988,57  |
| 9649  | IPI00453473 | 73,7 | 73,7 | ISGLIYEETR                     | 10 | 590,81  | 1179,61 |
| 19465 | IPI00453473 | 91   | 91   | TVTAMDVVYALK                   | 12 | 655,85  | 1309,69 |
| 15060 | IPI00453473 | 83,8 | 83,8 | TVTA(M)DVVYALK                 | 12 | 663,85  | 1325,69 |
| 7826  | IPI00186290 | 49,7 | 49,7 | FSVSPVVR                       | 8  | 445,76  | 889,50  |
| 8774  | IPI00186290 | 64,5 | 64,5 | GVQYLNEIK                      | 9  | 532,29  | 1062,57 |
| 13309 | IPI00186290 | 46,1 | 46,1 | VFDAI(M)NFK                    | 9  | 550,78  | 1099,54 |
| 6165  | IPI00186290 | 36,1 | 36,1 | QFAE(M)YVAK                    | 9  | 551,77  | 1101,52 |
| 8696  | IPI00186290 | 42,6 | 42,6 | EDLYLKPIQR                     | 10 | 637,86  | 1273,70 |
| 21200 | IPI00186290 | 55,2 | 55,2 | EGIPALDNFLDK                   | 12 | 666,35  | 1330,68 |
| 9931  | IPI00186290 | 79   | 79   | DLEEDHACIPIK                   | 12 | 720,34  | 1438,67 |
| 27205 | IPI00186290 | 61,4 | 61,4 | EGIPALDNFLDKL                  | 13 | 722,89  | 1443,76 |
| 24177 | IPI00186290 | 85,7 | 85,7 | TFCQLILDPIFK                   | 12 | 747,90  | 1493,80 |
| 28820 | IPI00186290 | 46,6 | 46,6 | STAISLFYELSENDLNFJK            | 19 | 735,38  | 2203,11 |
| 26192 | IPI00186290 | 74,3 | 74,3 | ALLELQLEPEELYQTFQR             | 18 | 740,72  | 2219,15 |
| 29108 | IPI00186290 | 81,1 | 81,1 | L(M)EPIYLVEIQCPQVVGGIYGVVLR    | 26 | 1002,52 | 3004,53 |
| 29110 | IPI00186290 | 33,9 | 33,9 | L(M)EPIYLVEI(Q)CPEQVVGGIYGVVLR | 26 | 752,39  | 3005,54 |
| 9324  | IPI00216691 | 89   | 89   | STGGAPTFNVTVTK                 | 14 | 690,36  | 1378,71 |
| 16822 | IPI00216691 | 94,8 | 94,8 | SSFYV(N)GLTLGGQK               | 14 | 736,38  | 1470,74 |
| 21755 | IPI00216691 | 92,6 | 92,6 | TFVNITPAEVLVVGK                | 16 | 548,65  | 1642,93 |
| 6773  | IPI00003269 | 51,6 | 51,6 | GY(N)FTTTAER                   | 10 | 580,76  | 1159,51 |
| 12804 | IPI00003269 | 93,2 | 93,2 | VAPDEHPILLTEAPLNPK             | 18 | 652,03  | 1953,06 |
| 10969 | IPI00003935 | 39,1 | 39,1 | ESYSIYVYK                      | 9  | 576,28  | 1150,55 |
| 8964  | IPI00444262 | 57,6 | 57,6 | ALELTGLK                       | 8  | 422,76  | 843,51  |
| 10844 | IPI00444262 | 63,6 | 63,6 | TGISDVFAK                      | 9  | 469,25  | 936,49  |
| 10954 | IPI00444262 | 81,8 | 81,8 | EVFEDAAEIR                     | 10 | 589,79  | 1177,56 |
| 17887 | IPI00444262 | 98,3 | 98,3 | GFGVDFNSEEDAK                  | 14 | 781,34  | 1560,67 |
| 19407 | IPI00444262 | 72,7 | 72,7 | FGYVDFESAEDLEK                 | 14 | 824,87  | 1647,73 |

|       |             |      |      |                                 |    |         |         |
|-------|-------------|------|------|---------------------------------|----|---------|---------|
| 25747 | IPI00444262 | 84,5 | 84,5 | VEGTEPTTAFNLFVGNLNFNK           | 21 | 1156,58 | 2311,15 |
| 19820 | IPI00465028 | 80,1 | 80,1 | QSLGELIGTLNAAK                  | 14 | 707,90  | 1413,78 |
| 9221  | IPI00465028 | 95,2 | 95,2 | HVFGESDELIGQK                   | 13 | 729,86  | 1457,71 |
| 20575 | IPI00465028 | 85,2 | 85,2 | VVLAYEPVWAIGTGK                 | 15 | 801,95  | 1601,88 |
| 13286 | IPI00465028 | 70   | 70   | VT(N)GAFTGEISPG(M)IK            | 16 | 819,91  | 1637,80 |
| 20350 | IPI00465028 | 92,5 | 92,5 | VPADTEVVCAPPTAYIDFAR            | 20 | 1096,54 | 2191,06 |
| 25955 | IPI00465028 | 72,7 | 72,7 | ELASQPDVDGFLVGGASLKPEFVDIINAK   | 29 | 1010,53 | 3028,57 |
| 26380 | IPI00465028 | 35,4 | 35,4 | ELASQPDVDGFLVGGASLKPEFVDII(N)AK | 29 | 1010,86 | 3029,56 |
| 8916  | IPI00013508 | 40,1 | 40,1 | ALDFIASK                        | 8  | 432,74  | 863,47  |
| 5858  | IPI00013508 | 66,2 | 66,2 | I(M)SIVDPNR                     | 9  | 530,78  | 1059,54 |
| 10096 | IPI00013508 | 54,8 | 54,8 | LAILGIHNEVSK                    | 12 | 647,38  | 1292,74 |
| 24485 | IPI00013508 | 78,9 | 78,9 | VGWEQLLTTIAR                    | 12 | 693,89  | 1385,77 |
| 13589 | IPI00013508 | 56,7 | 56,7 | TINEVENQILTR                    | 12 | 715,39  | 1428,76 |
| 4950  | IPI00013508 | 82,4 | 82,4 | LSNRPAF(M)PSEGR                 | 13 | 493,25  | 1476,71 |
| 15832 | IPI00013508 | 71   | 71   | AGTQIENIEEDFR                   | 13 | 761,36  | 1520,71 |
| 15320 | IPI00013508 | 86,9 | 86,9 | FAIQDISVEETSAK                  | 14 | 769,39  | 1536,77 |
| 12309 | IPI00013508 | 43   | 43   | (M)LDAEDIVGTARPDEK              | 16 | 592,62  | 1774,84 |
| 21907 | IPI00013508 | 58,2 | 58,2 | IDQLEGDHQLIQEALIFDNK            | 20 | 780,40  | 2338,18 |
| 25730 | IPI00013508 | 71   | 71   | VEQIAAIAQELNELDYYDSPSVNAR       | 25 | 936,79  | 2807,36 |
| 4652  | IPI00554788 | 57,7 | 57,7 | YETELA(M)R                      | 8  | 514,74  | 1027,46 |
| 8579  | IPI00554788 | 66,5 | 66,5 | IVLQIDNAR                       | 9  | 521,31  | 1040,60 |
| 5100  | IPI00554788 | 67,6 | 67,6 | VKYETELA(M)R                    | 10 | 628,32  | 1254,63 |
| 7751  | IPI00554788 | 98,6 | 98,6 | AQIFANTVDNAR                    | 12 | 660,34  | 1318,66 |
| 15892 | IPI00554788 | 55,2 | 55,2 | QAQEYEALLNIK                    | 12 | 710,38  | 1418,74 |
| 14161 | IPI00554788 | 68,6 | 68,6 | TVQSLEIDLDS(M)R                 | 13 | 761,87  | 1521,73 |
| 27037 | IPI00554788 | 54,1 | 54,1 | LQLETEIEALKEELLF(M)K            | 18 | 1097,09 | 2192,16 |
| 28420 | IPI00554788 | 55,1 | 55,1 | YALQ(M)EQL(N)GILLHLESELAQTR     | 23 | 896,46  | 2686,37 |
| 17687 | IPI00304925 | 66,1 | 66,1 | LLQDFE(N)GR                     | 9  | 555,78  | 1109,55 |
| 6020  | IPI00304925 | 61,3 | 61,3 | FGDPVVQSD(M)K                   | 11 | 619,79  | 1237,56 |
| 9846  | IPI00304925 | 63,1 | 63,1 | LVNHFVEEFK                      | 10 | 631,33  | 1260,65 |

|       |             |      |      |                                 |    |         |         |
|-------|-------------|------|------|---------------------------------|----|---------|---------|
| 17362 | IPI00304925 | 67,3 | 67,3 | FEELCSDLFR                      | 10 | 658,30  | 1314,59 |
| 10081 | IPI00304925 | 69,5 | 69,5 | AQIHDLVLVGGSTR                  | 14 | 733,41  | 1464,80 |
| 22740 | IPI00304925 | 35,5 | 35,5 | ELEQVCNPIISGLYQGAGGPGPGGFGAQQPK | 31 | 1019,17 | 3054,48 |
| 17007 | IPI00382470 | 65,6 | 65,6 | APFDLFENR                       | 9  | 554,77  | 1107,53 |
| 5670  | IPI00382470 | 55   | 55   | HIYYITGETK                      | 10 | 612,82  | 1223,62 |
| 12916 | IPI00382470 | 65,5 | 65,5 | TLTIVDTGIG(M)TK                 | 13 | 683,37  | 1364,72 |
| 20902 | IPI00382470 | 51,8 | 51,8 | HSQFIGYPITLFVEK                 | 15 | 593,65  | 1777,94 |
| 13804 | IPI00382470 | 98,9 | 98,9 | HLEINPDHSIIETLR                 | 15 | 596,32  | 1785,94 |
| 15557 | IPI00329801 | 45,6 | 45,6 | FITIFGTR                        | 8  | 477,77  | 953,53  |
| 9869  | IPI00329801 | 66,7 | 66,7 | VLTEIIASR                       | 9  | 501,30  | 1000,59 |
| 9124  | IPI00329801 | 31,2 | 31,2 | LYDAYELK                        | 8  | 507,76  | 1013,51 |
| 18005 | IPI00329801 | 67,8 | 67,8 | SEIDLFNIR                       | 9  | 553,80  | 1105,58 |
| 14304 | IPI00329801 | 75,6 | 75,6 | GTVTDFPGFDER                    | 12 | 670,81  | 1339,60 |
| 26530 | IPI00329801 | 59,3 | 59,3 | ETSGNLEQLLLAVVK                 | 15 | 807,46  | 1612,90 |
| 25885 | IPI00329801 | 96,7 | 96,7 | GLGTDEESILTLLTSR                | 16 | 852,95  | 1703,89 |
| 8136  | IPI00554648 | 39,4 | 39,4 | FASFIDK                         | 7  | 414,22  | 826,42  |
| 9596  | IPI00554648 | 40,9 | 40,9 | WSLLQQQK                        | 8  | 515,79  | 1029,56 |
| 11644 | IPI00554648 | 83,1 | 83,1 | LSELEAALQR                      | 10 | 565,31  | 1128,61 |
| 5605  | IPI00554648 | 65,1 | 65,1 | EYQEL(M)NVK                     | 9  | 585,28  | 1168,54 |
| 4622  | IPI00554648 | 66,7 | 66,7 | AEAES(M)YQIK                    | 10 | 593,28  | 1184,54 |
| 14526 | IPI00554648 | 78,9 | 78,9 | SLD(M)DSIIAEVK                  | 12 | 668,84  | 1335,66 |
| 14434 | IPI00554648 | 69,9 | 69,9 | ASLEAAIADAEQR                   | 13 | 448,90  | 1343,67 |
| 12964 | IPI00554648 | 75,3 | 75,3 | TE(M)ENEFVLIK                   | 11 | 684,84  | 1367,66 |
| 18332 | IPI00554648 | 76,5 | 76,5 | SN(M)DN(M)FESYINNLR             | 15 | 940,40  | 1878,79 |
| 25467 | IPI00554648 | 55   | 55   | QLYEEEIRELQSQISDTSVVLS(M)DNSR   | 27 | 1062,51 | 3184,52 |
| 7438  | IPI00169383 | 38,5 | 38,5 | VDFNVP(M)K                      | 8  | 483,24  | 964,47  |
| 21065 | IPI00169383 | 29,1 | 29,1 | VLPQVDALSNI                     | 11 | 549,31  | 1096,61 |
| 15185 | IPI00169383 | 60,3 | 60,3 | YSLEPVAVELK                     | 11 | 624,35  | 1246,68 |
| 19205 | IPI00169383 | 77,4 | 77,4 | ITLPVDFVTADK                    | 12 | 659,87  | 1317,72 |
| 12599 | IPI00169383 | 30,5 | 30,5 | LGDVYVNDAFGTAHR                 | 15 | 545,60  | 1633,78 |

|       |             |      |      |                         |    |        |         |
|-------|-------------|------|------|-------------------------|----|--------|---------|
| 12416 | IPI00169383 | 63,2 | 63,2 | LGDVYV(N)DAFGTAHR       | 15 | 545,93 | 1634,77 |
| 20145 | IPI00169383 | 99,6 | 99,6 | ACANPAAGSVILLENLR       | 17 | 884,97 | 1767,93 |
| 19960 | IPI00169383 | 95,9 | 95,9 | ALESPERPFLAILGGAK       | 17 | 590,34 | 1767,99 |
| 16567 | IPI00169383 | 62,7 | 62,7 | VLNN(M)EIGTSLFDEEGAK    | 18 | 991,97 | 1981,93 |
| 13749 | IPI00291006 | 39   | 39   | GCDVVVIPAGVPR           | 13 | 669,86 | 1337,71 |
| 15840 | IPI00291006 | 86,5 | 86,5 | GYLGPQLPDCLK            | 13 | 745,37 | 1488,73 |
| 19157 | IPI00291006 | 50   | 50   | VDFPQDQLTALTGR          | 14 | 780,90 | 1559,79 |
| 24435 | IPI00291006 | 94,3 | 94,3 | VAVLGASGGIGQPLSLLLK     | 19 | 897,05 | 1792,08 |
| 21217 | IPI00291006 | 86,5 | 86,5 | LTLYDIAHTPGVAADLSHIETK  | 22 | 789,08 | 2364,23 |
| 6503  | IPI00007765 | 37,2 | 37,2 | LFE(M)AYK               | 7  | 459,23 | 916,44  |
| 14655 | IPI00007765 | 85,5 | 85,5 | DAGQISGLNVLR            | 12 | 621,84 | 1241,67 |
| 20840 | IPI00007765 | 92,2 | 92,2 | AQFEGIVTDLIR            | 12 | 681,38 | 1360,74 |
| 6961  | IPI00007765 | 78,7 | 78,7 | QAVTNPNTFYATK           | 14 | 784,89 | 1567,76 |
| 22485 | IPI00007765 | 48,5 | 48,5 | LLGQFTLIGIPPAPR         | 15 | 796,98 | 1591,95 |
| 16680 | IPI00007765 | 31,1 | 31,1 | VINEPTAAALAYGLDK        | 16 | 549,30 | 1644,87 |
| 16370 | IPI00007765 | 51,2 | 51,2 | NAVITVPAYFNDSQR         | 15 | 847,93 | 1693,84 |
| 22355 | IPI00646779 | 81,2 | 81,2 | (M)ASTFIGNSTAIQELFK     | 17 | 937,47 | 1872,93 |
| 24877 | IPI00646779 | 59,5 | 59,5 | (M)ASTFIG(N)STAIQELFK   | 17 | 937,96 | 1873,91 |
| 6483  | IPI00171903 | 79,9 | 79,9 | (M)GAG(M)GFGLER         | 11 | 579,26 | 1156,50 |
| 4505  | IPI00171903 | 44,3 | 44,3 | (M)VPAG(M)GAGLER        | 12 | 610,79 | 1219,57 |
| 19200 | IPI00171903 | 77,7 | 77,7 | AFITNIPFDVK             | 11 | 632,85 | 1263,69 |
| 5905  | IPI00171903 | 84,6 | 84,6 | (M)GLA(M)GGGGGASFDR     | 15 | 708,31 | 1414,60 |
| 8003  | IPI00171903 | 56,4 | 56,4 | (M)GPLGLDH(M)ASSIER     | 15 | 549,26 | 1644,76 |
| 21877 | IPI00171903 | 58   | 58   | VGEVTVYVELL(M)DAEGK     | 16 | 884,94 | 1767,86 |
| 12649 | IPI00171903 | 64,3 | 64,3 | GNFGGSFAGSFGGAGGHAPGVAR | 23 | 678,99 | 2033,94 |
| 5323  | IPI00219217 | 71,3 | 71,3 | VIGSGCNLDSAR            | 12 | 624,80 | 1247,59 |
| 10589 | IPI00219217 | 86   | 86   | (M)VVESAYEVIK           | 11 | 642,33 | 1282,65 |
| 26295 | IPI00219217 | 72,1 | 72,1 | SLADELALVDVLEDK         | 15 | 543,96 | 1628,85 |
| 11039 | IPI00219217 | 88,3 | 88,3 | LIAPVAEEEEATVPNNK       | 16 | 847,95 | 1693,89 |
| 12469 | IPI00219217 | 89   | 89   | LIAPVAEEEEATVP(N)NK     | 16 | 848,44 | 1694,87 |



|       |             |      |      |                                    |    |         |         |
|-------|-------------|------|------|------------------------------------|----|---------|---------|
| 12586 | IPI00219217 | 41,6 | 41,6 | GE(M)(M)DLQHGSFLQTPK               | 17 | 982,47  | 1962,92 |
| 10811 | IPI00219217 | 35   | 35   | LKGE(M)(M)DLQHGSFLQTPK             | 19 | 735,71  | 2204,10 |
| 21882 | IPI00014230 | 99,7 | 99,7 | AFVDFLSDEIK                        | 11 | 642,33  | 1282,65 |
| 20885 | IPI00014230 | 80,2 | 80,2 | AFVDFLSDEIKEER                     | 14 | 566,62  | 1696,83 |
| 21792 | IPI00014230 | 61,1 | 61,1 | VEEQPELTSTPNFVVEVIK                | 20 | 1144,09 | 2286,16 |
| 22530 | IPI00014230 | 95,6 | 95,6 | ALVLDCHYPEDEVGQEDEAESDIFSIR        | 27 | 1046,14 | 3135,39 |
| 33453 | IPI00014230 | 58,8 | 58,8 | GVDNTFADELVELSTALEHQEYITFLEDLK     | 30 | 1147,23 | 3438,66 |
| 6431  | IPI00171611 | 58,6 | 58,6 | STELLIR                            | 7  | 416,25  | 830,49  |
| 31018 | IPI00171611 | 93,5 | 93,5 | FQSSAV(M)ALQEASEAYLVGLFEDTNLCAIHAK | 32 | 883,18  | 3528,68 |
| 17685 | IPI00299571 | 78,4 | 78,4 | NSYLEVLLK                          | 9  | 539,81  | 1077,61 |
| 23625 | IPI00299571 | 73,7 | 73,7 | TGEAIVDAALSALR                     | 14 | 693,88  | 1385,75 |
| 17415 | IPI00299571 | 67,2 | 67,2 | GSFSEQGINEFLR                      | 13 | 742,36  | 1482,71 |
| 17927 | IPI00299571 | 93,9 | 93,9 | LAAVDATVNQVLASR                    | 15 | 764,43  | 1526,84 |
| 13926 | IPI00299571 | 98,8 | 98,8 | GSTAPVGGGAFPTIVER                  | 17 | 808,43  | 1614,84 |
| 10094 | IPI00299571 | 32,9 | 32,9 | HHSLGGQYGVQGFPTIK                  | 17 | 609,32  | 1824,93 |
| 25075 | IPI00023598 | 62,1 | 62,1 | GHYTEGAELVDAVLDDVVR                | 18 | 648,33  | 1941,98 |
| 10144 | IPI00179964 | 70,9 | 70,9 | VTNLL(M)LK                         | 8  | 474,28  | 946,55  |
| 26580 | IPI00179964 | 86,2 | 86,2 | LPIDVTEGEVISLGLPFGK                | 19 | 992,55  | 1983,09 |
| 24840 | IPI00179964 | 42,7 | 42,7 | KLPIDVTEGEVISLGLPFGK               | 20 | 704,74  | 2111,19 |
| 24562 | IPI00179964 | 69,7 | 69,7 | IAIPGLAGAGNSVLLVSNLNPER            | 23 | 1138,14 | 2274,27 |
| 25357 | IPI00179964 | 30,7 | 30,7 | IAIPGLAGAG(N)SVLLVSNLNPER          | 23 | 759,43  | 2275,25 |
| 31848 | IPI00179964 | 95   | 95   | IIVENLFYPVTLDVHLHQIFSK             | 21 | 830,13  | 2487,37 |
| 26382 | IPI00216318 | 81,4 | 81,4 | TAFDEAIAELDTLNEESYK                | 19 | 1080,01 | 2158,00 |
| 31183 | IPI00216318 | 83,1 | 83,1 | EKIEAELQDICNDVLELLDK               | 20 | 796,40  | 2386,19 |
| 9226  | IPI00000816 | 67,6 | 67,6 | YLAEFATGNDR                        | 11 | 628,80  | 1255,58 |
| 4635  | IPI00013808 | 43,5 | 43,5 | LSNRPAF(M)PSEGK                    | 13 | 483,91  | 1448,71 |
| 13421 | IPI00013808 | 80,3 | 80,3 | AGTQIENIDEDFR                      | 13 | 754,35  | 1506,70 |
| 13691 | IPI00013808 | 55,1 | 55,1 | (M)APYQGPDAVPGALDYK                | 17 | 904,93  | 1807,85 |
| 15065 | IPI00411633 | 45   | 45   | SLIINTFYSNK                        | 11 | 650,35  | 1298,69 |
| 17872 | IPI00007188 | 93,2 | 93,2 | DFLAGGVAAAISK                      | 13 | 610,34  | 1218,66 |

|       |             |      |      |                    |    |        |         |
|-------|-------------|------|------|--------------------|----|--------|---------|
| 21365 | IPI0007188  | 86,6 | 86,6 | YFPTQALNFAFK       | 12 | 723,87 | 1445,73 |
| 11994 | IPI00219219 | 71   | 71   | SFVLNLGK           | 8  | 439,26 | 876,51  |
| 9144  | IPI00219219 | 43,5 | 43,5 | LPDGYEFK           | 8  | 484,74 | 967,46  |
| 10161 | IPI00219219 | 81,7 | 81,7 | DSNNLCLHFNPR       | 12 | 743,85 | 1485,68 |
| 11116 | IPI00219219 | 64,6 | 64,6 | DS(N)NLCLHFNPR     | 12 | 744,34 | 1486,66 |
| 18222 | IPI00219219 | 81,3 | 81,3 | LNLEAINY(M)AADGDFK | 16 | 900,93 | 1799,84 |
| 9296  | IPI00012011 | 59,8 | 59,8 | AVLFCLSEDKK        | 11 | 655,34 | 1308,68 |
| 10744 | IPI00012011 | 96,5 | 96,5 | YALYDATYETK        | 11 | 669,32 | 1336,62 |
| 15395 | IPI00012011 | 61,8 | 61,8 | LGGSAVISLEGKPL     | 14 | 670,89 | 1339,77 |
| 24285 | IPI00012011 | 71,9 | 71,9 | KEDLVFIFWAPESAPLK  | 17 | 664,03 | 1989,06 |
| 4385  | IPI00179330 | 29   | 29   | (M)QIFVK           | 6  | 391,22 | 780,42  |
| 8239  | IPI00179330 | 80,9 | 80,9 | ESTLHLVLR          | 9  | 534,31 | 1066,61 |
| 6951  | IPI00022774 | 73,5 | 73,5 | KGDIFLVR           | 8  | 474,29 | 946,56  |
| 11184 | IPI00022774 | 35,7 | 35,7 | GDDLSTAILK         | 10 | 516,78 | 1031,55 |
| 12434 | IPI00022774 | 31,3 | 31,3 | GILLYGPPGTGK       | 12 | 586,84 | 1171,66 |
| 11634 | IPI00022774 | 38,6 | 38,6 | GVLFGPPGCGK        | 12 | 626,31 | 1250,61 |
| 11096 | IPI00022774 | 34,4 | 34,4 | WALSQSNPSALR       | 12 | 665,35 | 1328,68 |
| 18460 | IPI00022774 | 89,8 | 89,8 | IVSQLLTL(M)DGLK    | 13 | 723,92 | 1445,82 |
| 21627 | IPI00022774 | 60,2 | 60,2 | LDQLIYIPLPDEK      | 13 | 778,93 | 1555,85 |
| 28012 | IPI00022774 | 64,7 | 64,7 | NAPAIIFIDELDAIAPK  | 17 | 604,34 | 1809,99 |
| 13156 | IPI00022774 | 62,3 | 62,3 | ELQELVQYPVEHPDK    | 15 | 912,46 | 1822,91 |
| 12824 | IPI00216308 | 35,7 | 35,7 | GYGFGLIK           | 8  | 427,74 | 853,47  |
| 18100 | IPI00216308 | 90,2 | 90,2 | LTL SALLD GK       | 10 | 515,81 | 1029,61 |
| 6966  | IPI00216308 | 78,4 | 78,4 | VTQSNFAVG YK       | 11 | 607,31 | 1212,61 |
| 12774 | IPI00216308 | 48   | 48   | LTFDSSFSPNTGK      | 13 | 700,84 | 1399,66 |
| 6868  | IPI00178352 | 32   | 32   | HIGISFTP K         | 9  | 500,28 | 998,55  |
| 11709 | IPI00178352 | 63,4 | 63,4 | LTVTSLQETGLK       | 12 | 645,37 | 1288,72 |
| 11841 | IPI00178352 | 79,4 | 79,4 | LYAQDADGCPIDIK     | 14 | 789,88 | 1577,74 |
| 20347 | IPI00178352 | 38,1 | 38,1 | SPFVVNVAPPLDLSK    | 15 | 791,94 | 1581,88 |
| 12431 | IPI00178352 | 89,2 | 89,2 | SPFEVQVSPEAGVQK    | 15 | 801,41 | 1600,81 |

|       |             |      |      |                                    |    |         |         |
|-------|-------------|------|------|------------------------------------|----|---------|---------|
| 30893 | IPI00178352 | 33,4 | 33,4 | VQYTAYEEGVHLVEVLYDEVAVPK           | 24 | 917,47  | 2749,38 |
| 8736  | IPI00297779 | 57,7 | 57,7 | GSGNLEAIHIIK                       | 12 | 626,36  | 1250,70 |
| 6043  | IPI00297779 | 59,8 | 59,8 | ILANTG(M)DTDK                      | 12 | 654,33  | 1306,64 |
| 9756  | IPI00297779 | 36,6 | 36,6 | GATQQILDEAER                       | 12 | 665,83  | 1329,65 |
| 19810 | IPI00297779 | 56,7 | 56,7 | SLHDALCVLAQTVK                     | 14 | 518,95  | 1553,82 |
| 23550 | IPI00297779 | 88   | 88   | LGGSLADSYLDEGFLLDK                 | 18 | 956,98  | 1911,95 |
| 20465 | IPI00297779 | 69,4 | 69,4 | LALVTGGEIASTFDHPELVK               | 20 | 699,71  | 2096,11 |
| 14940 | IPI00000874 | 56,4 | 56,4 | GLFIIDDK                           | 8  | 460,76  | 919,50  |
| 10114 | IPI00000874 | 57,1 | 57,1 | TIAQDYGVLK                         | 10 | 554,31  | 1106,60 |
| 5055  | IPI00000874 | 68,2 | 68,2 | ATAV(M)PDGQFK                      | 11 | 590,79  | 1179,56 |
| 11806 | IPI00000874 | 64,9 | 64,9 | QITVNDLPVGR                        | 11 | 606,34  | 1210,67 |
| 7983  | IPI00000874 | 74,3 | 74,3 | HGEVCPAGWKPGSDTIKPDVQK             | 22 | 602,30  | 2405,18 |
| 17085 | IPI00025512 | 78,6 | 78,6 | VSLDVNHFAPDELTVK                   | 16 | 892,46  | 1782,91 |
| 17655 | IPI00025512 | 75,3 | 75,3 | LATQSNEITIPVTFESR                  | 17 | 953,50  | 1904,98 |
| 18842 | IPI00025512 | 44,1 | 44,1 | LATQS(N)EITIPVTFESR                | 17 | 953,99  | 1905,97 |
| 22047 | IPI00025512 | 36,9 | 36,9 | YTLPPGVDPTQVSSSLSPGTLTVEAP(M)PK    | 30 | 1038,86 | 3113,55 |
| 20217 | IPI00025512 | 78,8 | 78,8 | KYTLPPGVDPTQVSSSLSPGTLTVEAP(M)PK   | 31 | 1081,56 | 3241,65 |
| 20247 | IPI00025512 | 29,2 | 29,2 | KYTLPPGVDPT(Q)VSSSLSPGTLTVEAP(M)PK | 31 | 1081,89 | 3242,65 |
| 31888 | IPI00220642 | 95,4 | 95,4 | ELEAVCQDVLSLLDNYLIK                | 19 | 745,72  | 2234,15 |
| 8616  | IPI00011253 | 67,5 | 67,5 | LLGGLAVR                           | 8  | 399,76  | 797,51  |
| 12524 | IPI00011253 | 80,5 | 80,5 | GLCAIAQAESLR                       | 12 | 644,84  | 1287,66 |
| 13216 | IPI00011253 | 37   | 37   | DEILPTTPISEQK                      | 13 | 735,89  | 1469,76 |
| 18290 | IPI00011253 | 94,5 | 94,5 | FGFPEGSVELYAEK                     | 14 | 786,88  | 1571,75 |
| 6516  | IPI00011253 | 53,8 | 53,8 | GGKPEPPA(M)PQPVPPTA                | 16 | 795,40  | 1588,79 |
| 19815 | IPI00011253 | 79,5 | 79,5 | FVDGL(M)IHSGDPVNYVDTAVR            | 22 | 828,73  | 2483,18 |
| 17660 | IPI00023048 | 73,5 | 73,5 | GVVQELQQAISK                       | 12 | 650,37  | 1298,72 |
| 10686 | IPI00023048 | 78,6 | 78,6 | LQIQCVVEDDK                        | 11 | 673,83  | 1345,65 |
| 9901  | IPI00023048 | 89,2 | 89,2 | IASLEVENQSLR                       | 12 | 679,87  | 1357,72 |
| 13754 | IPI00023048 | 41,1 | 41,1 | FEEHVQSVDIAAFNK                    | 15 | 578,62  | 1732,84 |
| 7291  | IPI00023048 | 47,1 | 47,1 | SLAGSSGPGASSGTSGDHGELVVR           | 24 | 729,02  | 2184,04 |

|                   |      |                                         |    |         |         |
|-------------------|------|-----------------------------------------|----|---------|---------|
| 5703 IPI00001639  | 29,4 | 29,4 TTLVI(M)ER                         | 8  | 489,77  | 977,52  |
| 18612 IPI00001639 | 77   | 77 SNEILTAIIQG(M)R                      | 13 | 731,39  | 1460,76 |
| 21030 IPI00001639 | 55,1 | 55,1 LAATNALLNSLEFTK                    | 15 | 803,45  | 1604,88 |
| 24787 IPI00001639 | 82,7 | 82,7 AAVENLPTFLVELSR                    | 15 | 829,96  | 1657,91 |
| 19867 IPI00001639 | 69   | 69 ESCLEAYTGIVQGLK                      | 15 | 834,42  | 1666,82 |
| 27472 IPI00001639 | 87,5 | 87,5 GALQYLVPILTQTLTK                   | 16 | 587,02  | 1758,03 |
| 9049 IPI00001639  | 40,7 | 40,7 GDQENVHPDV(M)LVQPR                 | 16 | 617,30  | 1848,88 |
| 7108 IPI00001639  | 36,4 | 36,4 LQQVLQ(M)ESHIQSTSDR                | 17 | 672,67  | 2014,97 |
| 29748 IPI00465070 | 91,1 | 91,1 FQSSAV(M)ALQEACEAYLVGLFEDTNLCAIHAK | 32 | 901,43  | 3601,68 |
| 29418 IPI00013890 | 68,4 | 68,4 VETELQGVCDTVLGLLDSHLIK             | 22 | 813,76  | 2438,27 |
| 11356 IPI00291175 | 86,2 | 86,2 AQQVSQGLDVLTAK                     | 14 | 729,40  | 1456,79 |
| 19085 IPI00291175 | 71,1 | 71,1 VDQLTAQLADLAAR                     | 14 | 742,91  | 1483,80 |
| 26132 IPI00291175 | 38   | 38 GILSGTSDLLLTDFDEAEVR                 | 19 | 1018,53 | 2035,05 |
| 30348 IPI00291175 | 82,8 | 82,8 AIPDLTAPVAAVQAAVSNLVR              | 21 | 692,73  | 2075,17 |
| 16145 IPI00010896 | 36,8 | 36,8 GFTIPEAFR                          | 9  | 519,27  | 1036,53 |
| 10821 IPI00010896 | 97,8 | 97,8 GVTFNVTTVDTK                       | 12 | 641,34  | 1280,66 |
| 23390 IPI00010896 | 37,5 | 37,5 IEEFLEAVLCPPR                      | 13 | 524,94  | 1571,80 |
| 20127 IPI00010896 | 95,7 | 95,7 LAALNPESNTAGLDIFAK                 | 18 | 922,99  | 1843,97 |
| 22635 IPI00010896 | 85,8 | 85,8 FLDGNELTLADCNLLPK                  | 17 | 966,99  | 1931,97 |
| 7026 IPI00440493  | 43,6 | 43,6 LELAQYR                            | 7  | 446,75  | 891,48  |
| 11314 IPI00440493 | 38,9 | 38,9 AVDSLVPIGR                         | 10 | 513,80  | 1025,59 |
| 14855 IPI00440493 | 45   | 45 TSIAIDTIINQK                         | 12 | 658,87  | 1315,73 |
| 6866 IPI00440493  | 92,8 | 92,8 TGTAE(M)SSILEER                    | 13 | 720,34  | 1438,66 |
| 20087 IPI00440493 | 41,5 | 41,5 TGAIVDVPVGEELLGR                   | 16 | 812,95  | 1623,88 |
| 20720 IPI00440493 | 75,3 | 75,3 G(M)SLNLEPDNVGVVVVFGNDK            | 20 | 1060,52 | 2119,03 |
| 20287 IPI00440493 | 77,5 | 77,5 FENAFLSHVVSQHQALLGTIR              | 21 | 789,76  | 2366,25 |
| 13299 IPI00604590 | 41,9 | 41,9 DRPFFPGLVK                         | 10 | 588,33  | 1174,65 |
| 8604 IPI00604590  | 32,5 | 32,5 TFIAIKPDGVQR                       | 12 | 672,88  | 1343,76 |
| 7011 IPI00604590  | 85,8 | 85,8 V(M)LGETNPADSKPGTIR                | 17 | 601,31  | 1800,90 |
| 8431 IPI00018206  | 34,6 | 34,6 IGASFLQR                           | 8  | 446,26  | 890,50  |

|       |             |      |                                              |    |         |         |
|-------|-------------|------|----------------------------------------------|----|---------|---------|
| 5723  | IPI00018206 | 59,5 | 59,5 (M)NLGVGAYR                             | 9  | 498,75  | 995,49  |
| 5405  | IPI00018206 | 64,9 | 64,9 VGAFT(M)VCK                             | 9  | 514,75  | 1027,48 |
| 5650  | IPI00018206 | 51,4 | 51,4 DAG(M)QLQGYR                            | 10 | 577,77  | 1153,52 |
| 14234 | IPI00018206 | 76,8 | 76,8 IAAAILNTPDLR                            | 12 | 634,37  | 1266,73 |
| 20462 | IPI00018206 | 78,1 | 78,1 EYLPIGGLAEFCK                           | 13 | 748,88  | 1495,74 |
| 20190 | IPI00018206 | 91,4 | 91,4 TCGFDFTGAVEDISK                         | 15 | 823,87  | 1645,73 |
| 14695 | IPI00220709 | 83,1 | 83,1 LVILEGELER                              | 10 | 585,84  | 1169,67 |
| 4337  | IPI00220709 | 47,5 | 47,5 (M)ELQE(M)QLK                           | 9  | 591,28  | 1180,55 |
| 12664 | IPI00220709 | 93,9 | 93,9 IQLVEEELDR                              | 10 | 622,33  | 1242,64 |
| 17097 | IPI00220709 | 88   | 88 TIDDLEETLASAK                             | 13 | 703,36  | 1404,70 |
| 4500  | IPI00216049 | 48,6 | 48,6 GGDL(M)AYDR                             | 9  | 507,22  | 1012,43 |
| 4665  | IPI00216049 | 48,5 | 48,5 NTDE(M)VELR                             | 9  | 561,76  | 1121,50 |
| 21770 | IPI00216049 | 97,4 | 97,4 IILDLISESPIK                            | 12 | 670,91  | 1339,80 |
| 28422 | IPI00216049 | 58,7 | 58,7 ILSISADIETIGEILK                        | 16 | 858,00  | 1713,98 |
| 19022 | IPI00216049 | 35,4 | 35,4 GSYGDLGGPIITTQVTIPK                     | 19 | 959,02  | 1916,03 |
| 23400 | IPI00216049 | 30,8 | 30,8 IITITGTQDQIQNAQYLLQNSVK                 | 23 | 863,80  | 2588,38 |
| 26410 | IPI00216049 | 36,4 | 36,4 IIPBLEGL(Q)LP(S)PTATSQLPLESDAVECLNYQHYK | 36 | 1379,34 | 4134,99 |
| 20420 | IPI00013881 | 76   | 76 STGEAFVQFASQEIAEK                         | 17 | 921,45  | 1840,88 |
| 24855 | IPI00013881 | 69,7 | 69,7 ATENDIYNFFSPLNPVR                       | 17 | 998,99  | 1995,97 |
| 24995 | IPI00013881 | 89,8 | 89,8 ATE(N)DIYNFFSPLNPVR                     | 17 | 999,48  | 1996,95 |
| 13371 | IPI00022434 | 68   | 68 VPQVSTPTLVEVSR                            | 14 | 756,43  | 1510,84 |
| 10629 | IPI00022434 | 98,6 | 98,6 KVPQVSTPTLVEVSR                         | 15 | 547,32  | 1638,93 |
| 24725 | IPI00010720 | 48   | 48 LGFAGLVQEISFGTTK                          | 16 | 834,45  | 1666,89 |
| 26267 | IPI00010720 | 80,8 | 80,8 WVGGPEIELIAIATGGR                       | 17 | 869,98  | 1737,94 |
| 6120  | IPI00303882 | 99,6 | 99,6 SVVTGGVQSV(M)GSR                        | 14 | 690,35  | 1378,69 |
| 12614 | IPI00303882 | 83,4 | 83,4 TLTAAAVSGAQPILSK                        | 16 | 764,44  | 1526,87 |
| 17355 | IPI00303882 | 92,2 | 92,2 LGQ(M)VLSGVDTVLGK                       | 15 | 766,92  | 1531,83 |
| 15015 | IPI00303882 | 77,6 | 77,6 LEENLPILQQPTEK                          | 14 | 826,45  | 1650,88 |
| 16627 | IPI00303882 | 87   | 87 IATSLDGFVDVASVQQQR                        | 17 | 917,97  | 1833,92 |
| 25230 | IPI00216319 | 54,7 | 54,7 ELETVCNDVLSLLDK                         | 15 | 874,44  | 1746,87 |

|       |             |      |      |                                   |    |         |         |
|-------|-------------|------|------|-----------------------------------|----|---------|---------|
| 17520 | IPI00220362 | 37,2 | 37,2 | DYFLFR                            | 6  | 430,72  | 859,42  |
| 16750 | IPI00220362 | 46,5 | 46,5 | FLPLFDR                           | 7  | 454,26  | 906,50  |
| 4982  | IPI00220362 | 57,7 | 57,7 | GGEIQVSVK                         | 10 | 507,28  | 1012,56 |
| 9059  | IPI00220362 | 53,6 | 53,6 | VLLPEYGGTK                        | 10 | 538,80  | 1075,59 |
| 18637 | IPI00220362 | 90,7 | 90,7 | VVLDDKDYFLFR                      | 12 | 765,40  | 1528,79 |
| 11669 | IPI00020984 | 94,6 | 94,6 | TPELNLDQFHDK                      | 12 | 486,24  | 1455,70 |
| 25265 | IPI00020984 | 95,5 | 95,5 | IPNPdffedLEPFR                    | 14 | 868,42  | 1734,83 |
| 18200 | IPI00020984 | 98,4 | 98,4 | APVPTGEVYFADSFDR                  | 16 | 885,92  | 1769,83 |
| 9601  | IPI00221178 | 55,1 | 55,1 | TSAALSTVGSISR                     | 14 | 660,86  | 1319,70 |
| 15272 | IPI00221178 | 69,2 | 69,2 | GLLSDS(M)TDVPVDTGVAAR             | 19 | 960,47  | 1918,93 |
| 16602 | IPI00746388 | 57,3 | 57,3 | LFFLQVK                           | 7  | 447,78  | 893,54  |
| 18717 | IPI00746388 | 47,9 | 47,9 | IGFPWSEIR                         | 9  | 552,80  | 1103,58 |
| 16035 | IPI00746388 | 71,9 | 71,9 | APDFVfyAPR                        | 10 | 591,80  | 1181,59 |
| 30573 | IPI00746388 | 82,6 | 82,6 | FYPEDVAEELIQDITQK                 | 17 | 680,00  | 2036,99 |
| 24482 | IPI00216975 | 78,4 | 78,4 | EENVGLHQTLdqTLNELNCI              | 20 | 1170,56 | 2339,10 |
| 5508  | IPI00012503 | 42,4 | 42,4 | LGPG(M)ADICK                      | 10 | 539,26  | 1076,50 |
| 29805 | IPI00012503 | 88,9 | 88,9 | EIVDSYLPVILDIK                    | 15 | 577,34  | 1728,99 |
| 7721  | IPI00027230 | 33   | 33   | SGYLLPDTK                         | 9  | 497,27  | 992,52  |
| 5843  | IPI00027230 | 49,4 | 49,4 | IYF(M)AGSSR                       | 9  | 524,25  | 1046,49 |
| 14186 | IPI00027230 | 39,6 | 39,6 | SILFVPTSAPR                       | 11 | 594,34  | 1186,67 |
| 14915 | IPI00027230 | 88,2 | 88,2 | GVVDSDDLPLNVSr                    | 14 | 743,38  | 1484,75 |
| 16305 | IPI00027230 | 94,9 | 94,9 | EEEAiQLDGLNASQIR                  | 16 | 893,45  | 1784,89 |
| 13101 | IPI00027230 | 83,5 | 83,5 | FQSSHPTDITSLDQYVER                | 19 | 754,03  | 2259,05 |
| 17747 | IPI00376005 | 68,4 | 68,4 | VHLVGIDIFTGK                      | 12 | 433,59  | 1297,74 |
| 9659  | IPI00376005 | 33   | 33   | YEDICPSTHN(M)DVPNIK               | 17 | 683,64  | 2047,90 |
| 8224  | IPI00376005 | 88,2 | 88,2 | KYEDICPSTHN(M)DVPNIK              | 18 | 726,34  | 2175,99 |
| 8514  | IPI00289334 | 42,9 | 42,9 | AGLAPLEVR                         | 9  | 463,28  | 924,54  |
| 10906 | IPI00289334 | 56,6 | 56,6 | AGPGTLsvTIEGpsk                   | 15 | 707,38  | 1412,75 |
| 25027 | IPI00289334 | 45,6 | 45,6 | DGSCSAEYIPFAPGDYDVNITYGGAHIPGSPFR | 33 | 1177,53 | 3529,58 |
| 4690  | IPI00550363 | 43   | 43   | IqAST(M)AFK                       | 9  | 506,76  | 1011,51 |

|       |             |      |      |                            |    |        |         |
|-------|-------------|------|------|----------------------------|----|--------|---------|
| 5850  | IPI00550363 | 91,6 | 91,6 | NVIGLQ(M)GTNR              | 11 | 609,82 | 1217,62 |
| 11714 | IPI00550363 | 59   | 59   | TL(M)NLGGLAVAR             | 12 | 616,34 | 1230,67 |
| 29710 | IPI00550363 | 60,5 | 60,5 | DGTVLCELINALYPEGQAPVK      | 21 | 763,06 | 2286,15 |
| 10594 | IPI00477313 | 53,2 | 53,2 | SDVEAIFSK                  | 9  | 498,26 | 994,50  |
| 7326  | IPI00477313 | 69,2 | 69,2 | KSDVEAIFSK                 | 10 | 562,30 | 1122,59 |
| 16352 | IPI00477313 | 71,2 | 71,2 | GFAFVQYVNER                | 11 | 665,33 | 1328,65 |
| 17310 | IPI00477313 | 95,7 | 95,7 | (M)IAGQVLDINLAAEPK         | 16 | 849,96 | 1697,90 |
| 11334 | IPI00029091 | 43   | 43   | FKPEELVDYK                 | 10 | 423,22 | 1266,65 |
| 5598  | IPI00555610 | 42,9 | 42,9 | FS(M)PGFK                  | 7  | 415,20 | 828,38  |
| 10509 | IPI00555610 | 64,2 | 64,2 | GEGPDVDVNLPK               | 12 | 620,31 | 1238,61 |
| 10679 | IPI00555610 | 43,6 | 43,6 | GEGPEVDVNLPK               | 12 | 627,32 | 1252,63 |
| 10814 | IPI00555610 | 65,1 | 65,1 | AEGPEVDVNLPK               | 12 | 634,33 | 1266,65 |
| 14336 | IPI00555610 | 37,5 | 37,5 | IS(M)PDIDLNLK              | 11 | 637,84 | 1273,66 |
| 10414 | IPI00555610 | 76,8 | 76,8 | IS(M)PDVDLHLK              | 11 | 428,56 | 1282,66 |
| 15717 | IPI00555610 | 30,3 | 30,3 | VGVEVPDVNIEGPEGK           | 16 | 819,42 | 1636,83 |
| 13591 | IPI00555610 | 50,7 | 50,7 | GGQIGLQAPGLSVSGPQGHLESGSGK | 26 | 806,75 | 2417,23 |
| 10394 | IPI00011274 | 86,3 | 86,3 | FGEVVDCTIK                 | 10 | 584,29 | 1166,56 |
| 18170 | IPI00011274 | 32,6 | 32,6 | GFCFITYTDEEPVK             | 14 | 853,39 | 1704,77 |
| 26712 | IPI00045109 | 87,2 | 87,2 | LLGGVTIAQGGVLPNIQAVLLPK    | 23 | 757,80 | 2270,37 |
| 17875 | IPI00023860 | 75,5 | 75,5 | YAVLYQPLFDK                | 11 | 678,86 | 1355,71 |
| 20870 | IPI00023860 | 68   | 68   | LDGLVETPTGYIESLPR          | 17 | 930,49 | 1858,97 |
| 16005 | IPI00023860 | 32,2 | 32,2 | NVDLLSD(M)VQEHDEPILK       | 18 | 704,35 | 2110,03 |
| 17192 | IPI00026781 | 39,7 | 39,7 | VLEALLPLK                  | 9  | 498,33 | 994,64  |
| 5110  | IPI00026781 | 47,1 | 47,1 | LG(M)LSPEGTCK              | 11 | 604,79 | 1207,56 |
| 25347 | IPI00026781 | 89,9 | 89,9 | LPEDPLLSGLLDSPALK          | 17 | 889,50 | 1776,99 |
| 29810 | IPI00026781 | 72,9 | 72,9 | TLLEGSGLESIIHSSLAEPK       | 23 | 808,11 | 2421,30 |
| 30228 | IPI00026781 | 34,1 | 34,1 | ALGLGVEQLPVVFEDVVLHQATILPK | 26 | 929,20 | 2784,57 |
| 6601  | IPI00643920 | 54,4 | 54,4 | (M)PSLPSYK                 | 8  | 469,74 | 937,46  |
| 22460 | IPI00643920 | 83,5 | 83,5 | LDNLVAILDINR               | 12 | 684,90 | 1367,78 |
| 16727 | IPI00643920 | 34,5 | 34,5 | VLDPFTIKPLDR               | 12 | 471,94 | 1412,80 |

|       |             |      |      |                              |    |         |         |
|-------|-------------|------|------|------------------------------|----|---------|---------|
| 13419 | IPI00643920 | 45,2 | 45,2 | SVPTSTVFYPSDGVATEK           | 18 | 942,96  | 1883,91 |
| 17087 | IPI00643920 | 64,5 | 64,5 | ILATPPQEDAPSVDIANIR          | 19 | 1010,54 | 2019,06 |
| 27067 | IPI00643920 | 71,9 | 71,9 | N(M)AEQIIQEIYSQIQSK          | 17 | 680,34  | 2038,00 |
| 8354  | IPI00643920 | 43   | 43   | LGQSDPAPLQHQ(M)DIYQK         | 18 | 695,67  | 2084,00 |
| 11796 | IPI00643920 | 59,7 | 59,7 | TSRPENAIYNNNEDFQVGQAK        | 22 | 836,74  | 2507,20 |
| 25487 | IPI00643920 | 30,2 | 30,2 | SKDDQVTVIGAGVTLHEALAAELLK    | 26 | 663,12  | 2648,44 |
| 23540 | IPI00003881 | 38,7 | 38,7 | ITGEAFVQFASQELA EK           | 17 | 934,47  | 1866,93 |
| 5870  | IPI00420096 | 83,3 | 83,3 | AE(M)EVLLASK                 | 10 | 553,79  | 1105,57 |
| 16657 | IPI00420096 | 71,6 | 71,6 | LTAEDLFEAR                   | 10 | 582,80  | 1163,58 |
| 10301 | IPI00420096 | 68   | 68   | AQVEQELTTLR                  | 11 | 644,35  | 1286,68 |
| 14775 | IPI00420096 | 47   | 47   | SQVEEELFSVR                  | 11 | 661,83  | 1321,65 |
| 19260 | IPI00420096 | 31,9 | 31,9 | LQNVQIALDYLR                 | 12 | 723,41  | 1444,80 |
| 20487 | IPI00420096 | 38,5 | 38,5 | DPYTGQSVSLFQALK              | 15 | 827,43  | 1652,84 |
| 29190 | IPI00420096 | 64,7 | 64,7 | DGHNLSLLEVLSGDSLPR           | 19 | 679,03  | 2034,07 |
| 29165 | IPI00420096 | 30,4 | 30,4 | DGH(N)LISLLEVLSGDSLPR        | 19 | 679,37  | 2035,08 |
| 23605 | IPI00420096 | 29,4 | 29,4 | GFFDPNTHENLTYLQLLER          | 19 | 769,72  | 2306,13 |
| 12631 | IPI00028888 | 87,3 | 87,3 | IFVGGLSPDTPEEK               | 14 | 744,88  | 1487,75 |
| 22165 | IPI00028888 | 42,9 | 42,9 | EYFGGFGEVESIELP(M)DNK        | 19 | 1088,99 | 2175,97 |
| 13239 | IPI00301311 | 49,7 | 49,7 | VEVTEFEDIK                   | 10 | 604,81  | 1207,60 |
| 22275 | IPI00301311 | 87,6 | 87,6 | IDFYFDENPYFENK               | 14 | 920,91  | 1839,80 |
| 14720 | IPI00301311 | 95,3 | 95,3 | EQQEAIEHIDEVQNEIDR           | 18 | 732,35  | 2194,01 |
| 12639 | IPI00013894 | 69   | 69   | AAALEFLNR                    | 9  | 502,78  | 1003,54 |
| 4885  | IPI00013894 | 51,5 | 51,5 | LILEQ(M)QK                   | 8  | 509,78  | 1017,55 |
| 14626 | IPI00013894 | 51,4 | 51,4 | L(M)DVGLIAIR                 | 10 | 558,83  | 1115,64 |
| 23660 | IPI00013894 | 98,1 | 98,1 | ALSVGNIDDALQCYSEAIK          | 19 | 1034,01 | 2066,00 |
| 24927 | IPI00017297 | 73,7 | 73,7 | ITPENLPQILLQLK               | 14 | 810,49  | 1618,97 |
| 21080 | IPI00017297 | 69,7 | 69,7 | IGPYQPNVPVGDYVIPK            | 18 | 985,04  | 1968,07 |
| 27610 | IPI00017297 | 42,4 | 42,4 | YQLLQLVEPFGVISNHLILNK        | 21 | 813,47  | 2437,37 |
| 11894 | IPI00219153 | 60,5 | 60,5 | ITVTSEVPFSK                  | 11 | 604,33  | 1206,65 |
| 26880 | IPI00219153 | 94,6 | 94,6 | FTLDCTHPVEDGI(M)DAANFEQFLQER | 26 | 1033,80 | 3098,37 |



|                   |      |                                    |    |         |         |
|-------------------|------|------------------------------------|----|---------|---------|
| 8674 IPI00465430  | 72   | 72 KQELLEALTK                      | 10 | 586,85  | 1171,68 |
| 14787 IPI00465430 | 86,9 | 86,9 TFNTSTGGLLLPSDTK              | 16 | 826,43  | 1650,85 |
| 12756 IPI00465430 | 88   | 88 SDSFENPVLQQHFR                  | 14 | 852,41  | 1702,81 |
| 28240 IPI00465430 | 47,7 | 47,7 IQVTPPGFQLVFLPFADDK           | 19 | 1066,58 | 2131,14 |
| 6986 IPI00215719  | 87,1 | 87,1 GCGTVLLSGPR                   | 11 | 558,79  | 1115,58 |
| 19600 IPI00215719 | 95,1 | 95,1 ILTFDQLALDSPK                 | 13 | 730,90  | 1459,79 |
| 13874 IPI00293276 | 71,2 | 71,2 LLCGLLAER                     | 9  | 522,80  | 1043,58 |
| 11244 IPI00293276 | 95,1 | 95,1 P(M)FIVNTNVPR                 | 11 | 652,34  | 1302,67 |
| 13766 IPI00220301 | 36,1 | 36,1 VVVFVFGPDK                    | 9  | 504,28  | 1006,55 |
| 17352 IPI00220301 | 66,8 | 66,8 LPFPIIDDR                     | 9  | 543,30  | 1084,59 |
| 12099 IPI00220301 | 61,8 | 61,8 LSILYPATTGR                   | 11 | 596,34  | 1190,67 |
| 13444 IPI00220301 | 57,6 | 57,6 DFTPVCTTELGR                  | 12 | 698,33  | 1394,65 |
| 21045 IPI00220301 | 86,2 | 86,2 PGGLLLGDVAPNFEANTTVGR         | 21 | 1049,55 | 2097,09 |
| 14992 IPI00009342 | 32,4 | 32,4 FFQTACDVPELQDK                | 14 | 849,40  | 1696,78 |
| 16977 IPI00009342 | 72,4 | 72,4 VDQIQEIVTGNPTVIK              | 16 | 877,49  | 1752,96 |
| 14837 IPI00009342 | 66,8 | 66,8 LPYDVTPEQALAHEEVK             | 17 | 647,00  | 1937,97 |
| 22937 IPI00009342 | 30,2 | 30,2 NVIFEISPTTEEVGDFEVK           | 18 | 1026,51 | 2051,01 |
| 22720 IPI00009342 | 80,7 | 80,7 LEGVLAEVAQHYQDTLIR            | 18 | 685,70  | 2054,08 |
| 32998 IPI00009342 | 48,7 | 48,7 IGGILANELSVDEAALHAAVIAINEAIDR | 29 | 986,86  | 2957,57 |
| 8766 IPI00024919  | 69,1 | 69,1 HLSVNDLPVGR                   | 11 | 603,83  | 1205,65 |
| 21465 IPI00024919 | 96,3 | 96,3 DYGVLLLEGSGLALR               | 14 | 731,90  | 1461,78 |
| 19050 IPI00031804 | 76,7 | 76,7 LTLDTIFVPNTGK                 | 13 | 709,90  | 1417,78 |
| 14194 IPI00397191 | 96,3 | 96,3 AGPNT(N)GSQFFICTAK            | 16 | 857,40  | 1712,78 |
| 13611 IPI00302927 | 33,3 | 33,3 AYILNLVK                      | 8  | 467,29  | 932,57  |
| 9159 IPI00302927  | 37,3 | 37,3 SIHDALCVIR                    | 10 | 592,32  | 1182,62 |
| 12374 IPI00302927 | 59,3 | 59,3 VIDPATATSVDLR                 | 13 | 679,37  | 1356,73 |
| 25280 IPI00302927 | 44,1 | 44,1 DALSDLALHFLNK                 | 13 | 486,26  | 1455,77 |
| 11621 IPI00302927 | 79,2 | 79,2 ETLLNSATTSLNSK                | 14 | 739,89  | 1477,76 |
| 19430 IPI00302927 | 75   | 75 ALIAGGGAPEIELALR                | 16 | 775,95  | 1549,88 |
| 11576 IPI00028091 | 40,5 | 40,5 YSYVCPDLVK                    | 10 | 622,31  | 1242,60 |

|       |             |      |      |                                       |    |         |         |
|-------|-------------|------|------|---------------------------------------|----|---------|---------|
| 30178 | IPI00028091 | 79,5 | 79,5 | DITYFIQQLR                            | 11 | 705,39  | 1408,77 |
| 9579  | IPI00028091 | 89,8 | 89,8 | LPACVVDCGTGYTK                        | 14 | 770,86  | 1539,70 |
| 22277 | IPI00028091 | 46,3 | 46,3 | GVDDLDFFIGDEAIEKPTYATK                | 22 | 815,40  | 2443,18 |
| 33048 | IPI00028091 | 40,2 | 40,2 | FLGPEIFFHPEFANPDFTQPISEVVDEVIQNCPIDVR | 37 | 1079,78 | 4315,08 |
| 9731  | IPI00217465 | 79,8 | 79,8 | ASGPPVSELITK                          | 12 | 599,84  | 1197,66 |
| 7283  | IPI00025252 | 56   | 56   | LNFAVASR                              | 8  | 439,25  | 876,48  |
| 6641  | IPI00025252 | 47,9 | 47,9 | FV(M)QEEFSR                           | 9  | 594,77  | 1187,53 |
| 16795 | IPI00025252 | 50   | 50   | GFPTIYFSPANK                          | 12 | 671,35  | 1340,68 |
| 22940 | IPI00025252 | 81,6 | 81,6 | ELSDFISYLQR                           | 11 | 685,85  | 1369,69 |
| 27165 | IPI00025252 | 46,8 | 46,8 | DASIVGFFDDSFSEAHSEFLK                 | 21 | 783,36  | 2347,06 |
| 23245 | IPI00025252 | 49,2 | 49,2 | TFSHELSDFGLESTAGEIPVVAIR              | 24 | 859,11  | 2574,30 |
| 27742 | IPI00005705 | 98,5 | 98,5 | EIFLSQPILLELEAPLK                     | 17 | 651,72  | 1952,12 |
| 12466 | IPI00005705 | 68,4 | 68,4 | IFCCHGGLSPDLQS(M)EQIR                 | 19 | 755,35  | 2263,02 |
| 7526  | IPI00217966 | 43,5 | 43,5 | LVIITAGAR                             | 9  | 457,29  | 912,58  |
| 14174 | IPI00217966 | 30,1 | 30,1 | FIIPNVVK                              | 8  | 465,29  | 928,57  |
| 19425 | IPI00217966 | 78,9 | 78,9 | DQLIYNLLK                             | 9  | 560,32  | 1118,63 |
| 10854 | IPI00217966 | 32,5 | 32,5 | QVVESAYEVIK                           | 11 | 632,84  | 1263,67 |
| 11179 | IPI00217966 | 63,2 | 63,2 | GE(M)(M)DLQHGSFLR                     | 14 | 833,39  | 1664,76 |
| 14446 | IPI00027626 | 67,3 | 67,3 | ALQFLEEVK                             | 9  | 538,80  | 1075,59 |
| 10456 | IPI00027626 | 35,6 | 35,6 | TEVNSGFFYK                            | 10 | 596,29  | 1190,56 |
| 17025 | IPI00027626 | 52   | 52   | VLAQNSGFDLQETLVK                      | 16 | 881,47  | 1760,93 |
| 31918 | IPI00027626 | 99,2 | 99,2 | VHAELADVLTEAVVDSILAIK                 | 21 | 736,08  | 2205,22 |
| 5077  | IPI00002966 | 35,9 | 35,9 | KLPE(M)DID                            | 8  | 488,74  | 975,46  |
| 5458  | IPI00002966 | 32   | 32   | QSLT(M)DPVVK                          | 10 | 567,30  | 1132,58 |
| 16792 | IPI00002966 | 55,6 | 55,6 | GCALQCAILSPA FK                       | 14 | 768,39  | 1534,76 |
| 25525 | IPI00002966 | 67,2 | 67,2 | EFSITDVVPYPISLR                       | 15 | 868,47  | 1734,92 |
| 23910 | IPI00002966 | 81,3 | 81,3 | SNLAYDIVQLPTGLTGIK                    | 18 | 952,03  | 1902,05 |
| 17830 | IPI00479217 | 35,8 | 35,8 | SSGPTSLFAVTVAPPGAR                    | 18 | 857,96  | 1713,91 |
| 23895 | IPI00479217 | 68,4 | 68,4 | EKPYFPIPEEYTFIQNVPLEDR                | 22 | 908,79  | 2723,35 |
| 9706  | IPI00021828 | 78,3 | 78,3 | VHVGDEDFVHLR                          | 12 | 474,91  | 1421,71 |

|       |             |      |      |                               |    |         |         |
|-------|-------------|------|------|-------------------------------|----|---------|---------|
| 10829 | IPI00021828 | 70   | 70   | VFQSLPHENKPLTLSNYQTNK         | 21 | 820,09  | 2457,26 |
| 27190 | IPI00219365 | 71   | 71   | FYPEDVSEELIQDITQR             | 17 | 694,67  | 2080,99 |
| 14514 | IPI00217468 | 93,8 | 93,8 | (N)GLSLAALK                   | 9  | 444,26  | 886,51  |
| 10249 | IPI00217468 | 70,7 | 70,7 | ATGPPVSELITK                  | 12 | 606,85  | 1211,68 |
| 14086 | IPI00023748 | 88,4 | 88,4 | SPASDTYIVFGEAK                | 14 | 742,87  | 1483,72 |
| 16867 | IPI00023748 | 73,3 | 73,3 | NILFVITKPDVYK                 | 13 | 775,45  | 1548,89 |
| 18617 | IPI00008274 | 55,6 | 55,6 | LSDLLAPISEQIK                 | 13 | 713,91  | 1425,81 |
| 29918 | IPI00008274 | 73,1 | 73,1 | AGAAPYVQAFDSLLAGPVAEYLK       | 23 | 784,41  | 2350,21 |
| 6113  | IPI00000875 | 31   | 31   | TPEFLR                        | 6  | 381,71  | 761,41  |
| 7253  | IPI00000875 | 50,3 | 50,3 | DPFAHLPK                      | 8  | 462,75  | 923,49  |
| 23075 | IPI00000875 | 74   | 74   | ILGLLDAYLK                    | 10 | 559,84  | 1117,67 |
| 8966  | IPI00000875 | 89,2 | 89,2 | ALIAAQYSGAQVR                 | 13 | 674,37  | 1346,73 |
| 15410 | IPI00025491 | 52,9 | 52,9 | (M)FVLDEADE(M)LSR             | 13 | 794,35  | 1586,69 |
| 4987  | IPI00025491 | 33,5 | 33,5 | DFTVSA(M)HGD(M)DQK            | 14 | 807,33  | 1612,65 |
| 8799  | IPI00025491 | 69,5 | 69,5 | LQ(M)EAPHIIVGTPGR             | 15 | 545,63  | 1633,86 |
| 9534  | IPI00465439 | 83   | 83   | PYQYPALTPEQK                  | 12 | 717,87  | 1433,72 |
| 17105 | IPI00465439 | 99   | 99   | GVVPLAGT(N)GETTTQGLDGLSER     | 23 | 1137,07 | 2272,12 |
| 22120 | IPI00465439 | 70,7 | 70,7 | YASICQQ(N)GIVPIVEPEILPDGDHDLK | 27 | 1007,83 | 3020,48 |
| 20787 | IPI00021290 | 34,8 | 34,8 | LGLVGVNLTLDGVK                | 14 | 699,42  | 1396,83 |
| 21280 | IPI00021290 | 48,3 | 48,3 | TIAIIAEGIPEALTR               | 15 | 784,46  | 1566,90 |
| 28770 | IPI00021290 | 87,5 | 87,5 | DLVSSLTSGLLTIGDR              | 16 | 823,95  | 1645,89 |
| 18305 | IPI00646304 | 79,5 | 79,5 | VIFGLFGK                      | 8  | 440,77  | 879,52  |
| 5283  | IPI00646304 | 62,3 | 62,3 | VLEG(M)EVVR                   | 9  | 524,28  | 1046,54 |
| 14256 | IPI00646304 | 32,6 | 32,6 | DF(M)IQGGDFTR                 | 11 | 651,79  | 1301,57 |
| 16410 | IPI00646304 | 61,7 | 61,7 | TVDNFVALATGEK                 | 13 | 682,86  | 1363,70 |
| 16952 | IPI00219757 | 78,7 | 78,7 | PPYTVVYFPVR                   | 11 | 669,37  | 1336,72 |
| 15947 | IPI00219757 | 59,4 | 59,4 | YISLIYTNYEAGK                 | 13 | 767,89  | 1533,77 |
| 20740 | IPI00219757 | 45,1 | 45,1 | AFLASPEYVNLPI(N)G(N)GK        | 18 | 953,48  | 1904,95 |
| 19312 | IPI00219757 | 50,8 | 50,8 | ALPGQLKPFETLLSQNQQGK          | 20 | 709,39  | 2125,15 |
| 8411  | IPI00024145 | 35,6 | 35,6 | (N)NFAVGYR                    | 8  | 471,23  | 940,44  |

|                   |      |                                       |    |         |         |
|-------------------|------|---------------------------------------|----|---------|---------|
| 8411 IPI00024145  | 35,6 | 35,6 N(N)FAVGYR                       | 8  | 471,23  | 940,44  |
| 14770 IPI00024145 | 90   | 90 LTLSALVDGK                         | 10 | 508,80  | 1015,59 |
| 14049 IPI00024145 | 69,7 | 69,7 LTFDITTFSPNTGK                   | 13 | 714,85  | 1427,69 |
| 15737 IPI00024145 | 69,3 | 69,3 TGDFQLHTNVNDGTEFGGSIYQK          | 23 | 843,39  | 2527,16 |
| 17495 IPI00220834 | 63,8 | 63,8 SQLDIIIHSLK                      | 11 | 422,92  | 1265,73 |
| 18610 IPI00220834 | 70,2 | 70,2 TDTLEDLFPTTK                     | 12 | 690,85  | 1379,68 |
| 25162 IPI00220834 | 39,1 | 39,1 HL(M)LPDFDLLEDIESK               | 16 | 965,98  | 1929,94 |
| 12506 IPI00220834 | 30,2 | 30,2 DQVTAQEIFQDNHEDGPTAK             | 20 | 748,34  | 2242,01 |
| 30963 IPI00220834 | 50,9 | 50,9 ASFEEASNQLINHIEQFLDTNETPYF(M)K   | 28 | 1111,51 | 3331,52 |
| 15517 IPI00215884 | 40,8 | 40,8 DIEDVIFYK                        | 8  | 514,75  | 1027,49 |
| 11721 IPI00215884 | 57,9 | 57,9 DGTGVVEFVR                       | 10 | 539,78  | 1077,55 |
| 10264 IPI00215884 | 92,7 | 92,7 EAGDVCYADVYR                     | 12 | 709,31  | 1416,60 |
| 21125 IPI00215884 | 63,6 | 63,6 GGPPFAFVEFEDPR                   | 14 | 782,88  | 1563,74 |
| 30895 IPI00219038 | 81   | 81 FQSAAIGALQEASEAYLVGLFEDTNLCAIHAK   | 32 | 860,18  | 3436,69 |
| 22757 IPI00100160 | 63,4 | 63,4 LGTLSALDILIK                     | 12 | 628,89  | 1255,78 |
| 29473 IPI00100160 | 42,5 | 42,5 IDLRPVLGEGVPILASFLR              | 19 | 689,08  | 2064,20 |
| 20080 IPI00025849 | 65,5 | 65,5 LLPQLTYLDGYDR                    | 13 | 783,91  | 1565,81 |
| 8976 IPI00183968  | 72,2 | 72,2 (M)ELQEIQLK                      | 9  | 574,30  | 1146,59 |
| 13639 IPI00183968 | 39,8 | 39,8 LVIIEGDLER                       | 10 | 578,83  | 1155,65 |
| 18445 IPI00008529 | 95,5 | 95,5 NIEDVIAQGIGK                     | 12 | 628,85  | 1255,68 |
| 13036 IPI00008529 | 52,3 | 52,3 LASVPAGGAVAVSAAPGSAAPAAGSAPAAAEK | 33 | 925,48  | 2773,42 |
| 10571 IPI00413108 | 34,1 | 34,1 YVDIAIPCNNK                      | 11 | 653,83  | 1305,64 |
| 17237 IPI00413108 | 63,5 | 63,5 AIVAIENPADVSVISSR                | 17 | 870,98  | 1739,94 |
| 18430 IPI00413108 | 38   | 38 FLAAGTHLGGTNLDFQ(M)EQYIYK          | 23 | 878,43  | 2632,26 |
| 17452 IPI00024915 | 71,1 | 71,1 VNLAELFK                         | 8  | 467,27  | 932,53  |
| 9024 IPI00024915  | 55,9 | 55,9 FS(M)VVQDGIVK                    | 11 | 619,83  | 1237,64 |
| 14129 IPI00024915 | 77,4 | 77,4 THLPGFVEQAEALK                   | 14 | 513,94  | 1538,81 |
| 19160 IPI00024915 | 55,3 | 55,3 GVLFGVPGAFTPGCSK                 | 16 | 797,41  | 1592,80 |
| 18440 IPI00024915 | 32,6 | 32,6 VGDAIPAVEVFEGEPGNK               | 18 | 914,46  | 1826,91 |
| 9986 IPI00008530  | 72,8 | 72,8 GNVGFVFTK                        | 9  | 484,76  | 967,51  |

|                   |      |                                     |    |         |         |
|-------------------|------|-------------------------------------|----|---------|---------|
| 15845 IPI00008530 | 64,2 | 64,2 IIQLLDDYPK                     | 10 | 609,34  | 1216,67 |
| 20877 IPI00008530 | 76,8 | 76,8 TSFFQALGITTK                   | 12 | 657,36  | 1312,70 |
| 21415 IPI00008530 | 33,7 | 33,7 GTIEILSDVQLIK                  | 13 | 714,92  | 1427,82 |
| 13676 IPI00008530 | 58,7 | 58,7 AGAIAPCEVTVPAQNTGLGPEK         | 22 | 1090,55 | 2179,09 |
| 17282 IPI00165393 | 75,2 | 75,2 DLSTVEALQNLK                   | 12 | 665,86  | 1329,72 |
| 24557 IPI00165393 | 75,1 | 75,1 SLDLFNCEITNLEDYR               | 16 | 1001,46 | 2000,91 |
| 23402 IPI00165393 | 48,3 | 48,3 KLELSDNIISGGLEVLAEK            | 19 | 676,71  | 2027,12 |
| 20982 IPI00290770 | 98,5 | 98,5 IGDEYFTFITDCK                  | 13 | 804,87  | 1607,72 |
| 29158 IPI00290770 | 40,5 | 40,5 ILQ(M)EEEYIQQLCEDIIQLKPDVVITEK | 28 | 859,19  | 3432,73 |
| 14541 IPI00290416 | 43   | 43 IGIVGLPNVGK                      | 11 | 533,83  | 1065,65 |
| 27102 IPI00290416 | 80,1 | 80,1 IPAFLNVVDIAGLVK                | 15 | 523,65  | 1567,93 |
| 16102 IPI00218733 | 90,7 | 90,7 GDGPVQGIINFEQK                 | 14 | 751,39  | 1500,76 |
| 23547 IPI00218733 | 40,3 | 40,3 DGVADVSIEDSVISLSGDHCIIGR       | 24 | 838,74  | 2513,21 |
| 5518 IPI00747533  | 42   | 42 YGPSL(M)PGGNK                    | 11 | 568,77  | 1135,53 |
| 23852 IPI00747533 | 68   | 68 LVPLLDTGDIIDGGNSEYR              | 20 | 1080,56 | 2159,11 |
| 12444 IPI00298547 | 64,4 | 64,4 GAEE(M)ETVIPVDV(M)R            | 15 | 854,40  | 1706,79 |
| 25535 IPI00298547 | 85,7 | 85,7 GLIAAICAGPTALLAHEIGFGSK        | 23 | 756,41  | 2266,22 |
| 20907 IPI00298547 | 43,1 | 43,1 EGPYDVVVLPGGNLGAQNLSESAVK      | 26 | 862,11  | 2583,32 |
| 8776 IPI00024933  | 83,4 | 83,4 IGPLGLSPK                      | 9  | 441,28  | 880,54  |
| 10831 IPI00024933 | 95,6 | 95,6 EILGTAQSVGCNVDGR               | 16 | 838,41  | 1674,80 |
| 20477 IPI00010796 | 57,4 | 57,4 ILEFFGLK                       | 8  | 483,79  | 965,56  |
| 20647 IPI00010796 | 45   | 45 ENLLDFIK                         | 8  | 496,28  | 990,54  |
| 7008 IPI00010796  | 67,7 | 67,7 SNFAEALAAHK                    | 11 | 579,80  | 1157,58 |
| 14134 IPI00010796 | 90,5 | 90,5 VDATEESDLAQQYGVR               | 16 | 890,92  | 1779,83 |
| 5478 IPI00001960  | 82,6 | 82,6 HPESNTAG(M)DIFAK               | 14 | 767,35  | 1532,69 |
| 19230 IPI00001960 | 68,3 | 68,3 FLDGNE(M)TLADCNLLPK            | 17 | 983,97  | 1965,92 |
| 21120 IPI00106509 | 59,6 | 59,6 GFGFILFK                       | 8  | 464,77  | 927,52  |
| 18995 IPI00106509 | 59,8 | 59,8 GFVFITFK                       | 8  | 479,77  | 957,53  |
| 4235 IPI00003377  | 48,8 | 48,8 VELSTG(M)PR                    | 9  | 503,26  | 1004,50 |
| 20540 IPI00003377 | 85,6 | 85,6 NPPGFAFVEFEDPR                 | 14 | 811,39  | 1620,76 |

|       |             |      |      |                            |    |        |         |
|-------|-------------|------|------|----------------------------|----|--------|---------|
| 6063  | IPI00329389 | 45,2 | 45,2 | HLTDAYFK                   | 8  | 497,75 | 993,49  |
| 7251  | IPI00329389 | 41,5 | 41,5 | YYPTEDVPR                  | 9  | 570,27 | 1138,53 |
| 27075 | IPI00329389 | 85,8 | 85,8 | ASITPGTILILTGR             | 15 | 763,47 | 1524,92 |
| 9349  | IPI00220327 | 69,1 | 69,1 | FLEQQNQVLQTK               | 12 | 738,40 | 1474,78 |
| 18087 | IPI00220327 | 43,9 | 43,9 | SLNNQFASFIDKVR             | 14 | 546,96 | 1637,85 |
| 7696  | IPI00221089 | 53   | 53   | GLSQSALPYR                 | 10 | 546,30 | 1090,58 |
| 16262 | IPI00221089 | 83,3 | 83,3 | GLTPSQIGVILR               | 12 | 627,38 | 1252,75 |
| 23155 | IPI00221089 | 29,3 | 29,3 | GLAPDLPEDLYHLIK            | 15 | 565,31 | 1692,91 |
| 5578  | IPI00018465 | 78,8 | 78,8 | GGAEQF(M)EETER             | 12 | 700,29 | 1398,57 |
| 11726 | IPI00018465 | 43,5 | 43,5 | TFSYAGFE(M)QPK             | 12 | 711,32 | 1420,63 |
| 19332 | IPI00018465 | 91,8 | 91,8 | LPIGDVATQYFADR             | 14 | 783,40 | 1564,79 |
| 5303  | IPI00219678 | 48,7 | 48,7 | YV(M)TTTTLER               | 10 | 615,81 | 1229,60 |
| 6653  | IPI00219678 | 43,3 | 43,3 | RPGYGAYDAFK                | 11 | 622,81 | 1243,60 |
| 5070  | IPI00219678 | 86,5 | 86,5 | AGLNCSTEN(M)PIK            | 13 | 725,84 | 1449,66 |
| 18212 | IPI00219678 | 33,1 | 33,1 | HAVSDPSILDSLNLNEDER        | 19 | 709,01 | 2124,00 |
| 23172 | IPI00293434 | 94,8 | 94,8 | VLESEQFLTELTR              | 14 | 839,46 | 1676,90 |
| 26390 | IPI00015077 | 74,3 | 74,3 | NICQFLVEIGLAK              | 13 | 752,91 | 1503,81 |
| 13446 | IPI00015077 | 67,7 | 67,7 | TLTTVQGIADDYDK             | 14 | 770,38 | 1538,75 |
| 18095 | IPI00015077 | 83,6 | 83,6 | FAC(N)GTVIEHPEYGEVIQLQGDQR | 24 | 921,10 | 2760,28 |
| 9821  | IPI00643041 | 61,1 | 61,1 | NLQYYDISAK                 | 10 | 607,81 | 1213,60 |
| 13654 | IPI00643041 | 87   | 87   | VCENIPIVLCGNK              | 13 | 758,39 | 1514,76 |
| 14962 | IPI00643041 | 34,5 | 34,5 | YVATLGVEVHPLVFHTNR         | 18 | 684,71 | 2051,10 |
| 20750 | IPI00216682 | 76,3 | 76,3 | DGIILCELINK                | 11 | 644,35 | 1286,69 |
| 6095  | IPI00216682 | 81,1 | 81,1 | AGQSVIGLQ(M)GTNK           | 14 | 710,37 | 1418,72 |
| 29008 | IPI00028109 | 74,1 | 74,1 | ERPPNPIEFLASYLLK           | 16 | 629,68 | 1886,03 |
| 33278 | IPI00028109 | 79,6 | 79,6 | AYLDQTVVPILLQGLAVLAK       | 20 | 709,09 | 2124,25 |
| 4119  | IPI00443909 | 42   | 42   | TIQ(M)GSFR                 | 8  | 478,24 | 954,46  |
| 12871 | IPI00443909 | 93,1 | 93,1 | INPDGSQSVVEVPYAR           | 16 | 865,94 | 1729,86 |
| 20715 | IPI00443909 | 43,1 | 43,1 | SEAHLTELEEICDR             | 15 | 605,62 | 1813,85 |
| 10279 | IPI00215914 | 97,3 | 97,3 | IL(M)VGLDAAGK              | 11 | 552,31 | 1102,61 |

|       |             |      |      |                              |    |         |         |
|-------|-------------|------|------|------------------------------|----|---------|---------|
| 24677 | IPI00215914 | 73,2 | 73,2 | LGEIVTTIPTIGFNVETVEYK        | 21 | 1162,13 | 2322,24 |
| 5848  | IPI00006052 | 50,4 | 50,4 | (M)VGGVLVER                  | 9  | 488,27  | 974,52  |
| 13289 | IPI00006052 | 84,5 | 84,5 | IETLTQQLQAK                  | 12 | 693,40  | 1384,79 |
| 10424 | IPI00005198 | 62,9 | 62,9 | VLQSALAAIR                   | 10 | 521,32  | 1040,63 |
| 20017 | IPI00005198 | 63,9 | 63,9 | ILPTLEAVAALGNK               | 14 | 705,42  | 1408,83 |
| 13401 | IPI00005198 | 36   | 36   | VKPAPDETSFSEALLK             | 16 | 577,98  | 1730,91 |
| 15670 | IPI00005198 | 31,7 | 31,7 | GT(M)TTGHNVADLVVILK          | 17 | 595,66  | 1783,95 |
| 13566 | IPI00009904 | 59,1 | 59,1 | FDVSGYPTIK                   | 10 | 563,79  | 1125,57 |
| 6296  | IPI00009904 | 65,2 | 65,2 | VSQGQLVV(M)QPEK              | 13 | 729,88  | 1457,75 |
| 19572 | IPI00009904 | 45,7 | 45,7 | VEGFPTIYFAPSGDK              | 15 | 814,40  | 1626,79 |
| 13736 | IPI00009904 | 47,1 | 47,1 | FA(M)EPEEFDSDTLR             | 14 | 851,87  | 1701,72 |
| 13424 | IPI00030179 | 92,4 | 92,4 | IALTDNALIAR                  | 11 | 585,85  | 1169,68 |
| 22737 | IPI00030179 | 58   | 58   | YGIIC(M)EDLIHEIYTVGK         | 18 | 724,02  | 2169,05 |
| 28312 | IPI00410034 | 39,2 | 39,2 | YELPLVIQALTNIEDK             | 16 | 620,34  | 1858,01 |
| 18640 | IPI00215777 | 48,1 | 48,1 | FGFYEVFK                     | 8  | 518,76  | 1035,51 |
| 21112 | IPI00215777 | 59,3 | 59,3 | GIF(N)GFSVTLK                | 11 | 592,32  | 1182,63 |
| 7468  | IPI00215777 | 42,3 | 42,3 | LPRPPPPE(M)PESLK             | 14 | 535,29  | 1602,84 |
| 26482 | IPI00215777 | 58,1 | 58,1 | YYALCGFGGVLSCGLTHTAVVPLDLVK  | 27 | 970,83  | 2909,48 |
| 8699  | IPI00015148 | 39,5 | 39,5 | YDPTIEDSYR                   | 10 | 629,78  | 1257,55 |
| 26170 | IPI00015148 | 94,5 | 94,5 | INVNEIFYDLVR                 | 12 | 747,90  | 1493,79 |
| 25635 | IPI00021347 | 61,6 | 61,6 | TDQVIQSLIALVNDPQPEHPLR       | 22 | 828,45  | 2482,32 |
| 21615 | IPI00001453 | 29   | 29   | KVESLLDELAFVR                | 13 | 506,96  | 1517,85 |
| 13571 | IPI00026154 | 37,7 | 37,7 | SLEDQVE(M)LR                 | 10 | 618,30  | 1234,59 |
| 5773  | IPI00026154 | 52,2 | 52,2 | ESLQQ(M)AEVTR                | 11 | 654,32  | 1306,62 |
| 9994  | IPI00026154 | 86,9 | 86,9 | AQQEQELAADAFK                | 13 | 724,85  | 1447,69 |
| 10419 | IPI00217975 | 63,2 | 63,2 | ALYETELADAR                  | 11 | 626,31  | 1250,61 |
| 31040 | IPI00217975 | 56   | 56   | SLEGDLEDLKDQIAQLEASLAAK      | 24 | 632,83  | 2527,29 |
| 24800 | IPI00217975 | 44,1 | 44,1 | TTIPEEEEEEEAAGVVVEELFHQQGTPR | 30 | 1137,86 | 3410,56 |
| 13484 | IPI00004358 | 36,5 | 36,5 | VIFLENYR                     | 8  | 527,29  | 1052,57 |
| 23440 | IPI00004358 | 99,9 | 99,9 | IGEEFLTDLSQLK                | 13 | 746,90  | 1491,78 |

|                   |      |                                                 |    |         |         |
|-------------------|------|-------------------------------------------------|----|---------|---------|
| 20312 IPI00031691 | 59,7 | 59,7 DFNHINVELSLLGK                             | 14 | 533,62  | 1597,85 |
| 20687 IPI00031691 | 55,5 | 55,5 TILSNQTVDIPENV DITLK                       | 19 | 1057,07 | 2112,13 |
| 14845 IPI00290566 | 73,1 | 73,1 IACLD FSLQK                                | 10 | 597,81  | 1193,61 |
| 16950 IPI00290566 | 65,7 | 65,7 YINENLIVNTDELGR                            | 15 | 881,95  | 1761,89 |
| 27922 IPI00290566 | 57,7 | 57,7 EVGDGTTSVVIIAAELLK                         | 18 | 908,01  | 1814,00 |
| 14214 IPI00003949 | 62   | 62 ICLDILK                                      | 7  | 437,76  | 873,50  |
| 10626 IPI00003949 | 32   | 32 LLAEPVPGIK                                   | 10 | 518,82  | 1035,63 |
| 19035 IPI00003949 | 95,2 | 95,2 YFHVVIAGPQDSPFEGGTFK                       | 20 | 732,70  | 2195,07 |
| 5590 IPI00015911  | 86,5 | 86,5 VCHAHPTLSEAFR                              | 13 | 508,92  | 1523,73 |
| 22920 IPI00015911 | 94,2 | 94,2 NLGLEELGIELDPR                             | 14 | 784,42  | 1566,83 |
| 23917 IPI00008527 | 62,9 | 62,9 AAGVNVPEFWPGLFAK                           | 16 | 851,95  | 1701,89 |
| 22067 IPI00008527 | 87,5 | 87,5 ALANVNIGSLICNVGAGGPAPAAGAAPAGGPAPSTAAAPAEK | 43 | 1270,31 | 3807,92 |
| 6556 IPI00031461  | 37,3 | 37,3 VTEGSFVYK                                  | 9  | 515,27  | 1028,52 |
| 22002 IPI00031461 | 51,2 | 51,2 FVSISDLLVPK                                | 11 | 609,36  | 1216,71 |
| 19957 IPI00031461 | 82   | 82 NPYYGGESASITPLEDLYK                          | 19 | 1059,01 | 2116,00 |
| 28607 IPI00031461 | 63,8 | 63,8 FDLGQDVIDFTGHALALYR                        | 19 | 717,70  | 2150,08 |
| 5885 IPI00009032  | 66,3 | 66,3 GQVLNIQ(M)R                                | 9  | 537,79  | 1073,57 |
| 22015 IPI00009032 | 66,8 | 66,8 ETDLLILFK                                  | 9  | 546,32  | 1090,63 |
| 20610 IPI00009032 | 62,8 | 62,8 ICHQIEYYFGDFNLPR                           | 16 | 691,33  | 2070,96 |
| 16387 IPI00396370 | 33   | 33 VNLFTDFDK                                    | 9  | 549,78  | 1097,54 |
| 4134 IPI00396370  | 41   | 41 (M)AQELY(M)EQK                               | 10 | 651,79  | 1301,56 |
| 17815 IPI00396370 | 84   | 84 GTQGVVTNFEIFR                                | 13 | 734,38  | 1466,75 |
| 16772 IPI00030154 | 51,6 | 51,6 APLDIPVPDPVK                               | 12 | 630,86  | 1259,71 |
| 16962 IPI00030154 | 39,4 | 39,4 TENLLGSYFPK                                | 11 | 634,83  | 1267,64 |
| 24862 IPI00030154 | 76,3 | 76,3 NAYAVLYDIILK                               | 12 | 698,40  | 1394,78 |
| 14930 IPI00015029 | 79,2 | 79,2 LTFSCLOGGSDNFK                             | 13 | 723,34  | 1444,67 |
| 18045 IPI00219622 | 40   | 40 GYSFSLTTFSPSGK                               | 14 | 739,86  | 1477,71 |
| 5185 IPI00335168  | 29,7 | 29,7 HVLVTLGEK                                  | 9  | 498,30  | 994,58  |
| 14559 IPI00335168 | 41,8 | 41,8 EAFQLFDR                                   | 8  | 513,26  | 1024,50 |
| 6301 IPI00335168  | 88,7 | 88,7 ILYSQCGDV(M)R                              | 11 | 679,32  | 1356,62 |



|                   |      |                             |    |        |         |
|-------------------|------|-----------------------------|----|--------|---------|
| 6788 IPI00384051  | 33,7 | 33,7 A(M)VLDLR              | 7  | 417,23 | 832,45  |
| 25290 IPI00384051 | 77,8 | 77,8 AFYAELYHISSNLEK        | 16 | 633,33 | 1896,96 |
| 6978 IPI00304596  | 33,7 | 33,7 VELDN(M)PLR            | 9  | 551,78 | 1101,55 |
| 32233 IPI00304596 | 97,8 | 97,8 NLPQYVSNELLEAFSVFGQVER | 23 | 890,11 | 2667,31 |
| 12929 IPI00219005 | 46,4 | 46,4 FSFDLGK                | 7  | 407,21 | 812,41  |
| 12666 IPI00219005 | 58   | 58 GEAHLAVNDFELAR           | 14 | 514,59 | 1540,76 |
| 22100 IPI00219005 | 77,1 | 77,1 FEIGEGENLDLPYGLER      | 17 | 975,98 | 1949,94 |
| 13546 IPI00298994 | 53,8 | 53,8 NLGTALAE LR            | 10 | 529,30 | 1056,59 |
| 17905 IPI00298994 | 90,8 | 90,8 GLAGAVSELLR            | 11 | 543,32 | 1084,62 |
| 6668 IPI00298994  | 29,3 | 29,3 AA(M)EPIVISAK          | 11 | 573,32 | 1144,62 |
| 14386 IPI00298994 | 46,9 | 46,9 V(M)VTNVTSLK           | 11 | 610,85 | 1219,68 |
| 28450 IPI00298994 | 51,2 | 51,2 GVGAAATAVTQALNELLQHVK  | 21 | 697,72 | 2090,15 |
| 17540 IPI00032826 | 53,8 | 53,8 AIDLFTDAIK             | 10 | 553,81 | 1105,60 |
| 10034 IPI00032826 | 68,7 | 68,7 AIEINPDSAQPYK          | 13 | 723,37 | 1444,72 |
| 4715 IPI00033494  | 40,9 | 40,9 ELLTT(M)GDR            | 9  | 526,26 | 1050,50 |
| 5775 IPI00033494  | 76,7 | 76,7 EAFN(M)IDQNR           | 10 | 627,28 | 1252,55 |
| 14905 IPI00033494 | 54,1 | 54,1 GNFN YIEFTR            | 10 | 630,80 | 1259,59 |
| 13976 IPI00033494 | 56,3 | 56,3 FTDEEVDEL YR           | 11 | 708,32 | 1414,63 |
| 17205 IPI00033494 | 44,7 | 44,7 DGFIDKEDLHD(M)LASLGK   | 18 | 673,99 | 2018,96 |
| 23542 IPI00296337 | 44,6 | 44,6 NILEESLCEL VAK         | 13 | 759,40 | 1516,78 |
| 24047 IPI00296337 | 47,9 | 47,9 E(M)KPVIFLDVFLPR       | 14 | 573,99 | 1718,94 |
| 20947 IPI00296337 | 88,1 | 88,1 TVGALQVLGTEAQSSLLK     | 18 | 908,02 | 1814,02 |
| 6428 IPI00291005  | 37,4 | 37,4 ENFSCLTR               | 8  | 513,74 | 1025,46 |
| 11106 IPI00291005 | 66,1 | 66,1 VIVVGNPANTNCLTASK      | 17 | 879,46 | 1756,91 |
| 10536 IPI00010740 | 71,2 | 71,2 YGEPGEVFINK            | 11 | 626,81 | 1251,61 |
| 22030 IPI00010740 | 60,4 | 60,4 LFGVGNLPADITEDEFK      | 16 | 904,46 | 1806,90 |
| 10934 IPI00376798 | 58,2 | 58,2 YDGIILPGK              | 9  | 488,28 | 974,54  |
| 15572 IPI00376798 | 66,3 | 66,3 VLEQLTGQTPVFSK         | 14 | 773,93 | 1545,84 |
| 23760 IPI00015842 | 91,4 | 91,4 EIVVLETLEDIDK          | 13 | 758,41 | 1514,81 |
| 8659 IPI00302925  | 68,8 | 68,8 LATNAAVTVLR            | 11 | 564,84 | 1127,67 |

|       |             |      |      |                                        |    |        |         |
|-------|-------------|------|------|----------------------------------------|----|--------|---------|
| 12979 | IPI00302925 | 32,9 | 32,9 | EDGAISTIVLR                            | 11 | 587,33 | 1172,64 |
| 6553  | IPI00302925 | 36,8 | 36,8 | TAEEL(M)NFSK                           | 10 | 593,28 | 1184,54 |
| 9016  | IPI00302925 | 43,7 | 43,7 | HFSGLEEAVYR                            | 11 | 436,55 | 1306,63 |
| 8056  | IPI00302925 | 65,1 | 65,1 | GSTDNL(M)DDIER                         | 12 | 691,30 | 1380,58 |
| 7196  | IPI00550021 | 70,7 | 70,7 | HGSLGFLPR                              | 9  | 492,27 | 982,53  |
| 23325 | IPI00550021 | 69,8 | 69,8 | SINPLGGFVHYGEVTNDFV(M)LK               | 22 | 818,41 | 2452,21 |
| 30538 | IPI00022744 | 75,2 | 75,2 | FLESVEGNQNYPLLLLTLLEK                  | 21 | 811,78 | 2432,31 |
| 32878 | IPI00022744 | 44,2 | 44,2 | SFSLQEAIPYIPTLITQLTQK                  | 23 | 873,16 | 2616,47 |
| 20282 | IPI00646240 | 57,5 | 57,5 | (M)GI(M)NSFVNDIFER                     | 14 | 852,89 | 1703,76 |
| 20382 | IPI00031522 | 61,5 | 61,5 | (M)GLVDQLVEPLGPGLKPPEER                | 21 | 764,08 | 2289,20 |
| 6871  | IPI00479366 | 55,7 | 55,7 | GCTATLGNFAK                            | 11 | 570,28 | 1138,54 |
| 13586 | IPI00479366 | 67,4 | 67,4 | SPYQEFTDHLVK                           | 12 | 488,58 | 1462,71 |
| 13399 | IPI00216298 | 97,2 | 97,2 | TAFQEALDAAGDK                          | 13 | 668,82 | 1335,63 |
| 17820 | IPI00016610 | 83   | 83   | IITLTGPTNAIFK                          | 13 | 694,91 | 1387,81 |
| 15575 | IPI00016610 | 63,8 | 63,8 | AITIAGVPQSVTECVK                       | 16 | 836,95 | 1671,89 |
| 12029 | IPI00479997 | 45,2 | 45,2 | DLSLEEIQK                              | 9  | 537,79 | 1073,56 |
| 17537 | IPI00479997 | 57,9 | 57,9 | ASGQAFELILSPR                          | 13 | 694,88 | 1387,75 |
| 17562 | IPI00010402 | 90,7 | 90,7 | IQYQLVDISQDNALR                        | 15 | 888,47 | 1774,92 |
| 4617  | IPI00719622 | 47,2 | 47,2 | VEF(M)DDTSR                            | 9  | 558,24 | 1114,46 |
| 20175 | IPI00719622 | 35,4 | 35,4 | EGDVLTLLESER                           | 12 | 680,85 | 1359,69 |
| 13266 | IPI00027834 | 74,3 | 74,3 | ASL(N)GADIYSGCCTLK                     | 16 | 865,89 | 1729,77 |
| 6571  | IPI00027834 | 56,7 | 56,7 | SKPGAA(M)VE(M)ADGYAVDR                 | 18 | 633,96 | 1898,85 |
| 17287 | IPI00027834 | 57,8 | 57,8 | YGP(Q)YGHPPPPPPPEYGPHADSPVL(M)VYGLDQSK | 35 | 951,21 | 3800,80 |
| 12319 | IPI00395627 | 66   | 66   | SFDLLVK                                | 7  | 411,24 | 820,47  |
| 11681 | IPI00395627 | 44,7 | 44,7 | TDTVLIICR                              | 9  | 545,80 | 1089,59 |
| 14639 | IPI00395627 | 63,9 | 63,9 | KAELLDNEKPAAVVAPITTGTYTVK              | 24 | 843,47 | 2527,39 |
| 18310 | IPI00010105 | 46,5 | 46,5 | ETEEILADVLC                            | 11 | 630,34 | 1258,67 |
| 10499 | IPI00010105 | 89,2 | 89,2 | HGLLVPNNTTDQELQHIR                     | 18 | 695,70 | 2084,08 |
| 26415 | IPI00010105 | 31,3 | 31,3 | TSIEDQDELSSLLQVPLVAGTVNR               | 24 | 862,12 | 2583,34 |
| 20570 | IPI00296022 | 53,1 | 53,1 | SHTEEDCTEELDFDLHAR                     | 18 | 559,75 | 2234,95 |

|                   |      |                                    |    |         |         |
|-------------------|------|------------------------------------|----|---------|---------|
| 7966 IPI00027442  | 81   | 81 AVYTQDCPLAAAK                   | 13 | 704,35  | 1406,68 |
| 5430 IPI00027442  | 72,2 | 72,2 KAEEIANE(M)IEAAK              | 14 | 521,60  | 1561,77 |
| 29023 IPI00027442 | 55,7 | 55,7 NVGCLQEALQLATSFAQLR           | 19 | 707,04  | 2118,09 |
| 19945 IPI00027107 | 60,9 | 60,9 LLDAVDTYIPVPAR                | 14 | 771,93  | 1541,85 |
| 9384 IPI00005159  | 29,3 | 29,3 VVVCD(N)GTGFVK                | 12 | 648,32  | 1294,62 |
| 9211 IPI00005159  | 34,2 | 34,2 ILLTEPP(M)NPTK                | 12 | 685,37  | 1368,73 |
| 10291 IPI00005159 | 54,4 | 54,4 GYAFNHSADFETVR                | 14 | 538,58  | 1612,73 |
| 20620 IPI00181306 | 92,3 | 92,3 IDLAVLLGK                     | 9  | 471,31  | 940,60  |
| 15432 IPI00221088 | 66,4 | 66,4 LDYILGLK                      | 8  | 467,78  | 933,55  |
| 12941 IPI00221088 | 66,9 | 66,9 LFEGNALLR                     | 9  | 516,80  | 1031,58 |
| 19520 IPI00015953 | 55,6 | 55,6 GVTFLFPIQAK                   | 11 | 610,86  | 1219,70 |
| 17722 IPI00015953 | 44,7 | 44,7 EGAFSNFPISEETIK               | 15 | 834,91  | 1667,80 |
| 19490 IPI00015953 | 81,5 | 81,5 LGVCFDVPTASVTEIQEK            | 18 | 997,00  | 1991,99 |
| 16937 IPI00742905 | 51,6 | 51,6 DFNLYLVR                      | 8  | 513,27  | 1024,53 |
| 31203 IPI00742905 | 75,9 | 75,9 ETPFELIEALLK                  | 12 | 701,89  | 1401,77 |
| 19730 IPI00221092 | 71,2 | 71,2 LLEPVLLLK                     | 10 | 547,86  | 1093,71 |
| 13469 IPI00005719 | 40   | 40 LLLIGDSGVGK                     | 11 | 536,32  | 1070,63 |
| 24535 IPI00005719 | 54,1 | 54,1 EFADSLGIPFLETSK               | 16 | 862,94  | 1723,87 |
| 12589 IPI00026185 | 78   | 78 STLNEIYFGK                      | 10 | 586,30  | 1170,59 |
| 12896 IPI00026185 | 37,5 | 37,5 DYLLCDYNR                     | 9  | 616,27  | 1230,53 |
| 5383 IPI00026185  | 65   | 65 SGSMT(M)NLGGSLTR                | 14 | 677,32  | 1352,63 |
| 25342 IPI00215637 | 84,4 | 84,4 SFLDLLNATGK                   | 12 | 646,37  | 1290,72 |
| 21170 IPI00215637 | 30   | 30 HVINFDLPSDIEEYVHR               | 17 | 695,01  | 2082,01 |
| 14805 IPI00453476 | 66,8 | 66,8 YADLTEDQLPSCESLK              | 16 | 934,93  | 1867,85 |
| 27620 IPI00453476 | 45,2 | 45,2 HLEGLSEEAI(M)ELNLPTGIPIVYELDK | 27 | 1013,86 | 3038,55 |
| 10434 IPI00641829 | 36,5 | 36,5 DVQEIFR                       | 7  | 453,74  | 905,46  |
| 4907 IPI00641829  | 66,1 | 66,1 (M)LEQLD(M)R                  | 8  | 534,25  | 1066,48 |
| 16362 IPI00641829 | 31,5 | 31,5 ILVATNLFGR                    | 10 | 552,33  | 1102,65 |
| 18020 IPI00641829 | 48,6 | 48,6 DFLLKPELLR                    | 10 | 415,25  | 1242,73 |
| 17837 IPI00012066 | 40,9 | 40,9 IITLAGPTNAIFK                 | 13 | 679,91  | 1357,80 |

|       |             |      |      |                                    |    |         |         |
|-------|-------------|------|------|------------------------------------|----|---------|---------|
| 11519 | IPI00012066 | 73,5 | 73,5 | LVVPASQCGSLIGK                     | 14 | 714,90  | 1427,78 |
| 22780 | IPI00012066 | 66,7 | 66,7 | AITIAGIPQSIIECVK                   | 16 | 856,98  | 1711,95 |
| 18762 | IPI00221222 | 45,3 | 45,3 | GISLNPEQWSQLK                      | 13 | 750,40  | 1498,78 |
| 16430 | IPI00329633 | 58   | 58   | IYGISFPDPK                         | 10 | 568,80  | 1135,59 |
| 16532 | IPI00329633 | 52,9 | 52,9 | F(M)ADIDLDPGCTLNK                  | 15 | 863,39  | 1724,77 |
| 26375 | IPI00329633 | 34,2 | 34,2 | DQELYFFHELSPGSCFFLPK               | 20 | 821,06  | 2460,15 |
| 23725 | IPI00008438 | 83,4 | 83,4 | IAIYELLFK                          | 9  | 555,33  | 1108,65 |
| 7266  | IPI00009790 | 52,9 | 52,9 | SFAGNLNTYK                         | 10 | 557,78  | 1113,54 |
| 15147 | IPI00009790 | 43,9 | 43,9 | NVIFQPVAELK                        | 11 | 629,36  | 1256,71 |
| 23125 | IPI00009790 | 90,5 | 90,5 | GITNLCVIGGDGSLTGANLFR              | 21 | 1068,05 | 2134,08 |
| 25080 | IPI00030706 | 45,1 | 45,1 | VFTTQELVQAFTHAPATLEADR             | 22 | 815,75  | 2444,24 |
| 12656 | IPI00000105 | 36,1 | 36,1 | TAVFGFETSEAK                       | 12 | 643,82  | 1285,62 |
| 21062 | IPI00000105 | 78,5 | 78,5 | LAQDPFPLYPGEVLEK                   | 16 | 908,48  | 1814,95 |
| 19992 | IPI00220503 | 88,6 | 88,6 | LLGPDAAINLTPDGALAK                 | 19 | 933,00  | 1863,99 |
| 7191  | IPI00026087 | 34,4 | 34,4 | DCFGCLR                            | 7  | 464,19  | 926,37  |
| 23055 | IPI00013415 | 54,2 | 54,2 | AHIFVPVPQLK                        | 12 | 669,43  | 1336,85 |
| 25930 | IPI00013415 | 45,2 | 45,2 | TLTAVHDAILEDLVFPSEIVGK             | 22 | 789,76  | 2366,27 |
| 26072 | IPI00013415 | 35,1 | 35,1 | IVKP(N)GKPDDEFESGISQALLELE(M)NSDLK | 30 | 837,67  | 3346,65 |
| 6416  | IPI00794894 | 65,1 | 65,1 | FPLTTESA(M)K                       | 10 | 570,78  | 1139,55 |
| 13179 | IPI00794894 | 92,3 | 92,3 | LAPDYDALDVANK                      | 13 | 702,85  | 1403,69 |
| 13434 | IPI00017334 | 46   | 46   | DLQNVNITLR                         | 10 | 593,33  | 1184,65 |
| 12521 | IPI00017334 | 48,8 | 48,8 | IFTSIGEDYDER                       | 12 | 722,83  | 1443,65 |
| 21360 | IPI00011454 | 53,1 | 53,1 | QYASLTGTQALPPLFSLGYHQSR            | 23 | 845,77  | 2534,29 |
| 18907 | IPI00017672 | 35,8 | 35,8 | FEVGDI(M)LIR                       | 10 | 604,82  | 1207,63 |
| 8586  | IPI00017672 | 43,2 | 43,2 | VI(M)DYESLEK                       | 10 | 621,80  | 1241,58 |
| 15997 | IPI00017672 | 29   | 29   | DHINLPGFSGQNPLR                    | 15 | 555,62  | 1663,84 |
| 15672 | IPI00017672 | 59,7 | 59,7 | LGADAVG(M)STVPEVIVAR               | 18 | 900,98  | 1799,95 |
| 15452 | IPI00550746 | 51,7 | 51,7 | GQPAIIDGELYNEVK                    | 15 | 823,43  | 1644,84 |
| 14735 | IPI00157456 | 84,7 | 84,7 | LVEALCAEHQINLIK                    | 15 | 875,98  | 1749,94 |
| 33558 | IPI00240909 | 32,3 | 32,3 | IQDALSTVLQYAEDVLSGK                | 19 | 1025,54 | 2049,06 |

|       |             |      |      |                             |    |         |         |
|-------|-------------|------|------|-----------------------------|----|---------|---------|
| 14461 | IPI00396435 | 39,9 | 39,9 | SNLGSVVLQLK                 | 11 | 579,35  | 1156,68 |
| 24275 | IPI00396435 | 76,1 | 76,1 | TLATDIL(M)GVLK              | 12 | 645,87  | 1289,73 |
| 6818  | IPI00396435 | 46   | 46   | HQSFVLVGETGSGK              | 14 | 723,37  | 1444,73 |
| 4947  | IPI00642513 | 60,4 | 60,4 | VITI(M)QNPR                 | 9  | 544,30  | 1086,59 |
| 16707 | IPI00007935 | 60,7 | 60,7 | ILGEVINALK                  | 10 | 535,33  | 1068,65 |
| 5548  | IPI00007935 | 70,8 | 70,8 | GCTGSLN(M)TLQR              | 12 | 677,32  | 1352,62 |
| 6811  | IPI00007935 | 40,4 | 40,4 | YTEFYHVPTHSDASK             | 15 | 594,61  | 1780,81 |
| 11226 | IPI00028004 | 54,2 | 54,2 | LNLVELK                     | 7  | 446,76  | 891,51  |
| 19737 | IPI00028004 | 66,8 | 66,8 | FGPYYTEPVIAGLDPK            | 16 | 883,95  | 1765,89 |
| 9329  | IPI00221091 | 54,1 | 54,1 | (M)NVLADALK                 | 9  | 495,77  | 989,52  |
| 13429 | IPI00221091 | 56,9 | 56,9 | HGYIGEFEIIDDHR              | 14 | 567,61  | 1699,80 |
| 11094 | IPI00398135 | 64,3 | 64,3 | TGAAPIIDVVR                 | 11 | 556,33  | 1110,64 |
| 10134 | IPI00398135 | 68,4 | 68,4 | NQSFVPTVNLDK                | 12 | 711,84  | 1421,66 |
| 5425  | IPI00012074 | 46,6 | 46,6 | L(M)(M)DPLSGQNR             | 11 | 647,30  | 1292,59 |
| 22367 | IPI00025366 | 71,9 | 71,9 | DILADLIPK                   | 9  | 499,30  | 996,59  |
| 7648  | IPI00008524 | 32,8 | 32,8 | FGPALSVK                    | 8  | 409,74  | 817,47  |
| 8914  | IPI00008524 | 42,5 | 42,5 | YQGVNLYVK                   | 9  | 542,30  | 1082,58 |
| 15077 | IPI00008524 | 36,9 | 36,9 | FSPAGPILSIR                 | 11 | 579,34  | 1156,66 |
| 13716 | IPI00008524 | 44   | 44   | ALDT(M)NFDVIK               | 11 | 641,82  | 1281,63 |
| 24455 | IPI00008524 | 39,8 | 39,8 | ITG(M)LLEIDNSELLH(M)LESPELR | 24 | 924,80  | 2771,37 |
| 9371  | IPI00328319 | 50,6 | 50,6 | GEFGGFGSVSGK                | 12 | 564,77  | 1127,52 |
| 16060 | IPI00328319 | 90,7 | 90,7 | TPSSDVLVFDYTK               | 13 | 736,37  | 1470,72 |
| 6363  | IPI00176903 | 57,5 | 57,5 | V(M)IYQDEVK                 | 9  | 570,78  | 1139,55 |
| 18285 | IPI00176903 | 93,6 | 93,6 | IIGAVDQIQLTQAQLEER          | 18 | 1013,05 | 2024,09 |
| 8414  | IPI00003918 | 34,1 | 34,1 | EAVLLLK                     | 7  | 393,26  | 784,51  |
| 19515 | IPI00003918 | 80,4 | 80,4 | IEEVPELPLVVEDK              | 14 | 804,94  | 1607,87 |
| 6621  | IPI00642816 | 37,9 | 37,9 | LYLADP(M)K                  | 8  | 483,75  | 965,49  |
| 17095 | IPI00642816 | 80,2 | 80,2 | VTDDLVLVYK                  | 11 | 662,84  | 1323,67 |
| 8074  | IPI00219330 | 58,4 | 58,4 | VLQD(M)GLPTGAEGR            | 14 | 730,36  | 1458,71 |
| 17510 | IPI00219330 | 87,5 | 87,5 | VLGETLSVNDPPDVLDR           | 18 | 955,50  | 1908,98 |

|       |             |      |      |                       |    |        |         |
|-------|-------------|------|------|-----------------------|----|--------|---------|
| 21157 | IPI00217030 | 31,5 | 31,5 | TDITYPAGF(M)DVISIDK   | 17 | 951,46 | 1900,91 |
| 13486 | IPI00030275 | 58,1 | 58,1 | ELLQESALIR            | 10 | 586,34 | 1170,66 |
| 16385 | IPI00030275 | 86,3 | 86,3 | GVVDESDIPLNLSR        | 14 | 757,40 | 1512,78 |
| 10071 | IPI00465260 | 30,9 | 30,9 | TVNVVQFEPSK           | 11 | 624,34 | 1246,66 |
| 24610 | IPI00465260 | 67,7 | 67,7 | TFFSFPAVVAPFK         | 13 | 729,40 | 1456,78 |
| 24965 | IPI00014850 | 73,4 | 73,4 | DNLSYIEHIFEISR        | 14 | 579,29 | 1734,86 |
| 8184  | IPI00465431 | 31,1 | 31,1 | GNDVAFHFNPR           | 11 | 425,21 | 1272,60 |
| 10916 | IPI00465431 | 58,9 | 58,9 | IQVLVEPDHFK           | 11 | 442,25 | 1323,72 |
| 8746  | IPI00021370 | 38,7 | 38,7 | GEIAGPPDTPYEGGR       | 15 | 758,36 | 1514,70 |
| 12421 | IPI00016342 | 42,9 | 42,9 | ATIGADFLTK            | 10 | 518,79 | 1035,56 |
| 4937  | IPI00016342 | 30,4 | 30,4 | TSL(M)NQYVNK          | 10 | 607,30 | 1212,58 |
| 21602 | IPI00016342 | 55,6 | 55,6 | DPENFPFVVLGK          | 13 | 738,38 | 1474,74 |
| 20255 | IPI00016342 | 54,3 | 54,3 | EAINVEQAFQTIAR        | 14 | 795,42 | 1588,82 |
| 11556 | IPI00297160 | 29,1 | 29,1 | ALSIGFETCR            | 10 | 577,29 | 1152,56 |
| 27027 | IPI00383680 | 74,8 | 74,8 | SIVEEIEDLVAR          | 12 | 686,87 | 1371,72 |
| 26195 | IPI00217223 | 71,5 | 71,5 | ITSCIFQLLQEAGIK       | 15 | 574,31 | 1719,92 |
| 6741  | IPI00215998 | 67,8 | 67,8 | V(M)SEFNNNFR          | 10 | 637,28 | 1272,56 |
| 23935 | IPI00334159 | 81,1 | 81,1 | LHLGIPEAVFVEDVDSF(M)K | 19 | 721,37 | 2161,08 |
| 21637 | IPI00014177 | 70,9 | 70,9 | TIISYIDEQFER          | 12 | 757,38 | 1512,74 |
| 13664 | IPI00014177 | 51,9 | 51,9 | LTVVDTPGYGDAINCR      | 16 | 875,93 | 1749,84 |
| 18187 | IPI00298363 | 65,3 | 65,3 | IINDLLQSLR            | 10 | 592,85 | 1183,69 |
| 11884 | IPI00298363 | 31,3 | 31,3 | LASQGDSISSQLGPIHPPPR  | 20 | 686,36 | 2056,07 |
| 14957 | IPI00216951 | 57,1 | 57,1 | IYVISLAEPR            | 10 | 580,84 | 1159,66 |
| 14747 | IPI00216951 | 41,9 | 41,9 | LPLQLDDAVRPEAEGEEGR   | 20 | 741,70 | 2222,08 |
| 27845 | IPI00015361 | 67,7 | 67,7 | NQLDQEVFLSTSIAQLK     | 18 | 688,36 | 2062,06 |
| 18247 | IPI00449049 | 74   | 74   | TTNFAGILSQGLR         | 13 | 689,38 | 1376,74 |
| 16992 | IPI00449049 | 56,4 | 56,4 | VVSEDFLQDVSASTK       | 15 | 812,91 | 1623,80 |
| 12739 | IPI00297982 | 85,6 | 85,6 | IVLTNPVCTEVGEK        | 14 | 779,91 | 1557,81 |
| 13349 | IPI00297982 | 44,1 | 44,1 | SCGSSTPDEFPTDIPGTK    | 18 | 948,42 | 1894,83 |
| 11261 | IPI00013877 | 46,9 | 46,9 | STGEAFVQFASK          | 12 | 636,32 | 1270,62 |

|       |             |      |      |                        |    |        |         |
|-------|-------------|------|------|------------------------|----|--------|---------|
| 25030 | IPI00013877 | 81,7 | 81,7 | ATE(N)DIANFFSPLNPIR    | 17 | 960,48 | 1918,94 |
| 25732 | IPI00218493 | 77   | 77   | FFADLLDYIK             | 10 | 622,83 | 1243,65 |
| 21042 | IPI00218493 | 43,9 | 43,9 | NVLIVEDIIDTGG          | 13 | 714,90 | 1427,79 |
| 12224 | IPI00419880 | 32,6 | 32,6 | LFCVGFTK               | 8  | 486,25 | 970,49  |
| 8534  | IPI00419880 | 30,9 | 30,9 | NCLTNFHG(M)DLTR        | 13 | 532,24 | 1593,70 |
| 15195 | IPI00419880 | 43,5 | 43,5 | ACQSIYPLHDVFVR         | 14 | 568,96 | 1703,84 |
| 21362 | IPI00025874 | 74,5 | 74,5 | NLVEQHIQDIVVHYTFNK     | 18 | 733,05 | 2196,13 |
| 14554 | IPI00179589 | 73   | 73   | GPDGLTAFEATDNQAIK      | 17 | 874,43 | 1746,84 |
| 25767 | IPI00179589 | 38   | 38   | KPLHYAADCGQLEILEFLLK   | 21 | 824,45 | 2470,33 |
| 10874 | IPI00023785 | 42   | 42   | GVEICIATPGR            | 11 | 586,81 | 1171,60 |
| 16807 | IPI00023785 | 51   | 51   | GDGPICLVLAPTR          | 13 | 684,87 | 1367,72 |
| 15602 | IPI00023785 | 63,6 | 63,6 | ELAQQVQQVADDYGK        | 15 | 846,42 | 1690,82 |
| 7958  | IPI00784008 | 52,1 | 52,1 | AIFQTIQNR              | 9  | 545,80 | 1089,59 |
| 24317 | IPI00784008 | 72,8 | 72,8 | ENIVEAIIHSPELIR        | 15 | 578,32 | 1731,95 |
| 8334  | IPI00410693 | 65,1 | 65,1 | PGHLQEGFGCVVTNR        | 15 | 557,61 | 1669,80 |
| 20882 | IPI00008240 | 66,3 | 66,3 | ITQDIFQQLK             | 11 | 673,89 | 1345,76 |
| 18510 | IPI00006980 | 99,1 | 99,1 | NAEPLINLDVNNPDFK       | 16 | 906,96 | 1811,91 |
| 10479 | IPI00029744 | 98,6 | 98,6 | SGDSEVYQLGDVSQK        | 15 | 806,38 | 1610,74 |
| 18345 | IPI00215901 | 86   | 86   | LVSDE(M)VVELIEK        | 13 | 760,40 | 1518,78 |
| 13094 | IPI00215901 | 31   | 31   | LQAYHTQTTPLIEYYR       | 16 | 666,34 | 1996,00 |
| 15372 | IPI00008575 | 72,1 | 72,1 | KDDEENYLDLFSHK         | 14 | 584,94 | 1751,80 |
| 22357 | IPI00221232 | 59,3 | 59,3 | SDPLLIGIPTSSENPFK      | 16 | 864,46 | 1726,91 |
| 8596  | IPI00100197 | 96,6 | 96,6 | LGAAPPEESAYVAGEK       | 16 | 810,89 | 1619,77 |
| 24437 | IPI00478011 | 60,3 | 60,3 | FFEVLIDPFHK            | 12 | 502,28 | 1503,81 |
| 11614 | IPI00010182 | 46,9 | 46,9 | TKPSDEE(M)LFIYGHYK     | 16 | 658,65 | 1972,92 |
| 13331 | IPI00010182 | 48   | 48   | QATVGDINTERPG(M)LDFTGK | 20 | 722,69 | 2165,04 |
| 17585 | IPI00304409 | 73,1 | 73,1 | LQAVEVVITHLAPGTK       | 16 | 559,33 | 1674,97 |
| 10846 | IPI00299573 | 56,2 | 56,2 | AGVNTVTTLVENK          | 13 | 673,37 | 1344,72 |
| 18137 | IPI00299573 | 48   | 48   | VPPAINQFTQALDR         | 14 | 785,42 | 1568,83 |
| 17317 | IPI00009634 | 35,9 | 35,9 | EGNAIFTFPNTPVK         | 14 | 767,90 | 1533,78 |

|       |             |      |      |                       |    |         |         |
|-------|-------------|------|------|-----------------------|----|---------|---------|
| 10926 | IPI00384016 | 94,3 | 94,3 | TPAFAESVTEGDVR        | 14 | 739,86  | 1477,70 |
| 15702 | IPI00289499 | 63,6 | 63,6 | LDFNLIR               | 7  | 445,76  | 889,50  |
| 18917 | IPI00289499 | 32,5 | 32,5 | NLTALGLNLVASGGTAK     | 17 | 800,46  | 1598,90 |
| 24472 | IPI00289499 | 39,6 | 39,6 | ALFEEVPELLTEAEK       | 15 | 859,45  | 1716,88 |
| 19740 | IPI00022442 | 48,9 | 48,9 | L(M)CPQEIVDYIADK      | 14 | 855,91  | 1709,80 |
| 5060  | IPI00786968 | 41   | 41   | HFVG(M)LPEK           | 9  | 537,28  | 1072,54 |
| 16250 | IPI00004092 | 92,4 | 92,4 | VGEATETALTCLVEK       | 15 | 810,91  | 1619,80 |
| 14266 | IPI00075248 | 32   | 32   | EAFSLFDK              | 8  | 478,74  | 955,47  |
| 14016 | IPI00075248 | 38,7 | 38,7 | VFDKDG(N)GYISAAELR    | 16 | 585,96  | 1754,85 |
| 30753 | IPI00302850 | 70,8 | 70,8 | YFILPDSLPLDTLLVDVEPK  | 20 | 763,08  | 2286,23 |
| 15792 | IPI00017596 | 90,4 | 90,4 | NIELICQENEGENDPVLQR   | 19 | 1135,54 | 2269,06 |
| 17297 | IPI00291510 | 56   | 56   | NLIDAGVDALR           | 11 | 578,82  | 1155,62 |
| 23767 | IPI00291510 | 62,3 | 62,3 | LPIVNEDDELVAIIAR      | 16 | 890,50  | 1778,98 |
| 13689 | IPI00016801 | 43,4 | 43,4 | YNLGLDLR              | 8  | 482,27  | 962,52  |
| 6713  | IPI00016801 | 49,1 | 49,1 | ALASL(M)TYK           | 9  | 507,27  | 1012,53 |
| 21275 | IPI00026302 | 76,9 | 76,9 | LYTLVTYVPVTTFK        | 14 | 822,97  | 1643,92 |
| 4725  | IPI00000494 | 50,6 | 50,6 | HI(M)GQNVADY(M)R      | 12 | 733,83  | 1465,64 |
| 5350  | IPI00000494 | 33,7 | 33,7 | YL(M)EEDEDAYKK        | 12 | 517,23  | 1548,67 |
| 29095 | IPI00168184 | 57,3 | 57,3 | DNTIEHLLPLFLAQLK      | 16 | 622,35  | 1864,04 |
| 19892 | IPI00168184 | 31,4 | 31,4 | IGPILDNSTLQSEVKPILEK  | 20 | 732,08  | 2193,23 |
| 19097 | IPI00642982 | 50,8 | 50,8 | DIIALNPLYR            | 10 | 594,34  | 1186,67 |
| 22102 | IPI00642982 | 42,4 | 42,4 | LSSDVLTLLIK           | 11 | 601,37  | 1200,73 |
| 14096 | IPI00642982 | 43,3 | 43,3 | LGLLDNHSSEFNVTR       | 15 | 567,96  | 1700,85 |
| 9664  | IPI00021766 | 67   | 67   | GPLPAAPPVAPER         | 13 | 636,36  | 1270,70 |
| 13784 | IPI00000861 | 87   | 87   | GFSVVADTPELQR         | 13 | 709,87  | 1417,72 |
| 12931 | IPI00010157 | 86,8 | 86,8 | FVIGGPQGDAGLTGR       | 15 | 722,88  | 1443,75 |
| 10171 | IPI00291922 | 29,5 | 29,5 | ITSPL(M)EPSSIEK       | 13 | 724,37  | 1446,73 |
| 13166 | IPI00291922 | 68,5 | 68,5 | GPQLFH(M)DPSGTFVQCDAR | 19 | 726,99  | 2177,96 |
| 14366 | IPI00175098 | 86,4 | 86,4 | FNADEFED(M)VAEK       | 13 | 780,83  | 1559,64 |
| 7116  | IPI00419373 | 41,6 | 41,6 | IETIEV(M)EDR          | 10 | 625,80  | 1249,59 |



|       |             |      |      |                                  |    |         |         |
|-------|-------------|------|------|----------------------------------|----|---------|---------|
| 16982 | IPI00419373 | 29,7 | 29,7 | GFAFVTFDDHDTVDK                  | 15 | 571,93  | 1712,77 |
| 20552 | IPI00032460 | 74,3 | 74,3 | YVQLPADEVDTQLLQDAAR              | 19 | 1073,04 | 2144,07 |
| 24692 | IPI00014238 | 31,4 | 31,4 | YLDLILNDFVR                      | 11 | 690,88  | 1379,74 |
| 14381 | IPI00014238 | 62,7 | 62,7 | LPETNLFETEETR                    | 13 | 789,89  | 1577,76 |
| 18377 | IPI00014238 | 33,6 | 33,6 | VTYHPDGPEGQAYDVDFTPPFR           | 22 | 836,72  | 2507,14 |
| 19920 | IPI00219156 | 56,5 | 56,5 | VCTLAIDPGDSDIIR                  | 16 | 879,46  | 1756,90 |
| 28322 | IPI00024320 | 62,3 | 62,3 | LFVGGNLFNTDEQALEDHFSSFGPISEVVVVK | 32 | 1165,59 | 3493,74 |
| 16582 | IPI00007764 | 62,5 | 62,5 | VLRPPGGGSNFSLSGFDEPTEQPVR        | 24 | 852,77  | 2555,28 |
| 9209  | IPI00012007 | 65,8 | 65,8 | IILLAEGR                         | 8  | 442,78  | 883,55  |
| 6873  | IPI00012007 | 40   | 40   | FDNLYGCR                         | 8  | 522,73  | 1043,45 |
| 9306  | IPI00029601 | 58,8 | 58,8 | VDQSAVGFHEYQGK                   | 13 | 714,34  | 1426,67 |
| 19897 | IPI00029601 | 43,2 | 43,2 | YGLFPANYVELR                     | 12 | 721,38  | 1440,74 |
| 16345 | IPI00218606 | 83,1 | 83,1 | VANVSLALYK                       | 11 | 595,86  | 1189,71 |
| 5380  | IPI00031836 | 83,1 | 83,1 | IAEIEAE(M)AR                     | 10 | 574,78  | 1147,55 |
| 12429 | IPI00009104 | 62,2 | 62,2 | LLIVSTTPYSEK                     | 12 | 675,88  | 1349,74 |
| 20482 | IPI00009104 | 38,6 | 38,6 | EYQDAFLFNELK                     | 12 | 758,87  | 1515,72 |
| 16500 | IPI00001589 | 82,4 | 82,4 | VQIAVANAQELLQR                   | 14 | 776,94  | 1551,87 |
| 22705 | IPI00105598 | 33,8 | 33,8 | EQSILELGSLLAK                    | 13 | 700,90  | 1399,79 |
| 19492 | IPI00105598 | 65   | 65   | LYDNLLEQNLIR                     | 12 | 752,41  | 1502,81 |
| 17277 | IPI00005969 | 45,6 | 45,6 | FITHAPPGEFNEVFNDVR               | 18 | 697,01  | 2088,01 |
| 6888  | IPI00295741 | 51,5 | 51,5 | ICEPGYSPTYK                      | 11 | 657,81  | 1313,60 |
| 22910 | IPI00429191 | 80,1 | 80,1 | VNIDFEPFKPINTSLYLCDNK            | 21 | 843,09  | 2526,25 |
| 7016  | IPI00645078 | 54,4 | 54,4 | LDQP(M)TEIVSR                    | 11 | 652,83  | 1303,64 |
| 24157 | IPI00645078 | 37   | 37   | SLVASLAEPDFVVTDFAK               | 18 | 955,00  | 1907,99 |
| 23347 | IPI00645078 | 42,3 | 42,3 | AAVATFLQSVQVPEFTPK               | 18 | 967,03  | 1932,04 |
| 11864 | IPI00219155 | 62,7 | 62,7 | NIDDGTSDRPYSHALVAGIDR            | 21 | 758,04  | 2271,09 |
| 25090 | IPI00185374 | 79,8 | 79,8 | LQEVIELLSLEK                     | 13 | 757,94  | 1513,86 |
| 25092 | IPI00007755 | 79,5 | 79,5 | GIEELFLDLCK                      | 11 | 668,84  | 1335,67 |
| 12616 | IPI00061178 | 69,9 | 69,9 | LFIGGLNTETNEK                    | 13 | 718,37  | 1434,74 |
| 14481 | IPI00216587 | 66,5 | 66,5 | NCIVLIDSTPYR                     | 12 | 725,87  | 1449,73 |

|                   |      |                                         |    |        |         |
|-------------------|------|-----------------------------------------|----|--------|---------|
| 7643 IPI0003815   | 51,1 | 51,1 TDY(M)VGSYGPR                      | 11 | 631,28 | 1260,54 |
| 7028 IPI00013895  | 54,7 | 54,7 DGYNYTLSK                          | 9  | 530,75 | 1059,49 |
| 23092 IPI00013895 | 38,1 | 38,1 TEFLSF(M)NTELAFTK                  | 16 | 933,45 | 1864,89 |
| 31395 IPI00013895 | 36,9 | 36,9 KLDTNSDGQLDFSEFLNLIGGLA(M)ACHDSFLK | 32 | 893,93 | 3571,70 |
| 10091 IPI00009960 | 77,9 | 77,9 LSEQELQFR                          | 9  | 575,30 | 1148,58 |
| 19857 IPI00031556 | 44,4 | 44,4 NFAFLEFR                           | 8  | 522,27 | 1042,52 |
| 16760 IPI00031556 | 47,4 | 47,4 ELLTSFGPLK                         | 10 | 552,82 | 1103,62 |
| 17252 IPI00031556 | 34,8 | 34,8 LGGLTQAPGNPVLAVQINQDK              | 21 | 711,73 | 2132,16 |
| 7213 IPI00220766  | 33,8 | 33,8 VLG(M)TLIQK                        | 9  | 509,80 | 1017,59 |
| 15790 IPI00220766 | 67,2 | 67,2 DFLLQQT(M)LR                       | 10 | 640,84 | 1279,66 |
| 10599 IPI00215780 | 77,3 | 77,3 VLQALEGLK                          | 9  | 485,80 | 969,59  |
| 17407 IPI00216694 | 31,7 | 31,7 LSPEELLLR                          | 9  | 535,32 | 1068,62 |
| 5275 IPI00216694  | 37,6 | 37,6 EAN(M)PLPGYK                       | 10 | 568,28 | 1134,54 |
| 24197 IPI00216694 | 31,5 | 31,5 VDLNS(N)GFICDYELHELK               | 19 | 772,03 | 2313,06 |
| 12394 IPI00216694 | 37,9 | 37,9 EGICALGGTSELSSEGTQHSYSEEEK         | 26 | 929,08 | 2784,20 |
| 10521 IPI00179953 | 77,1 | 77,1 KPTDGASSSNCVTDISHLVR               | 20 | 715,35 | 2143,03 |
| 6943 IPI00219097  | 69,6 | 69,6 KHPDSSVNFAEFSK                     | 14 | 531,59 | 1591,76 |
| 18387 IPI00021187 | 50,5 | 50,5 LDPSIFESLQK                        | 11 | 638,84 | 1275,67 |
| 20827 IPI00021187 | 39,6 | 39,6 YSVQLLTPANLLAK                     | 14 | 765,95 | 1529,88 |
| 17372 IPI00023640 | 76,1 | 76,1 VSEQGLIEILK                        | 11 | 614,86 | 1227,71 |
| 19190 IPI00026182 | 46,6 | 46,6 FTITPSTTQVVGILK                    | 15 | 802,97 | 1603,92 |
| 23417 IPI00555902 | 75,7 | 75,7 VALAGLLGFGLGK                      | 13 | 608,38 | 1214,74 |
| 12091 IPI00290460 | 43,8 | 43,8 ELAEQLGLSTGEK                      | 13 | 687,86 | 1373,70 |
| 9234 IPI00290460  | 55,8 | 55,8 LPGELEPVQATQNK                     | 14 | 762,41 | 1522,80 |
| 23357 IPI00028006 | 52,1 | 52,1 FILNLPFTFSVR                       | 11 | 653,88 | 1305,74 |
| 13354 IPI00442168 | 39,1 | 39,1 FQLLEGPPES(M)GR                    | 13 | 738,86 | 1475,71 |
| 19117 IPI00018398 | 53,2 | 53,2 VDILDPALLR                         | 10 | 562,84 | 1123,66 |
| 7113 IPI00007074  | 40,1 | 40,1 HVLFPK                             | 7  | 427,27 | 852,52  |
| 11081 IPI00007074 | 32,2 | 32,2 SEFVILR                            | 7  | 432,25 | 862,49  |
| 21862 IPI00439944 | 74,8 | 74,8 NSNILEDLETLR                       | 12 | 708,87 | 1415,73 |

|       |             |      |      |                           |    |        |         |
|-------|-------------|------|------|---------------------------|----|--------|---------|
| 28367 | IPI00329745 | 57   | 57   | SEAA(N)GNLDFVLSFLK        | 16 | 863,44 | 1724,86 |
| 21682 | IPI00329745 | 49,4 | 49,4 | TVQLTSSELESTLETLLK        | 17 | 940,00 | 1877,98 |
| 25685 | IPI00178431 | 36   | 36   | ADCILYYGFGDIFR            | 14 | 855,40 | 1708,79 |
| 26982 | IPI00000846 | 73,3 | 73,3 | FHNLEGFLEEFADIAK          | 16 | 627,31 | 1878,91 |
| 19715 | IPI00002459 | 33,8 | 33,8 | GSIHDFPGFDPNQDAEALYTA(M)K | 23 | 847,38 | 2539,13 |
| 25872 | IPI00026089 | 72,8 | 72,8 | ICFELLELLK                | 10 | 639,36 | 1276,71 |
| 23007 | IPI00165467 | 72,7 | 72,7 | ITISPLQELTYLNPFR          | 16 | 944,01 | 1886,02 |
| 7661  | IPI00017448 | 57,5 | 57,5 | TYAICGAIR                 | 9  | 512,77 | 1023,52 |
| 16585 | IPI00219446 | 72,3 | 72,3 | LYTLVLTDPDAPSR            | 14 | 780,92 | 1559,82 |
| 18622 | IPI00027252 | 37,3 | 37,3 | VLPSIVNEVLK               | 11 | 605,87 | 1209,73 |
| 17827 | IPI00027252 | 44,2 | 44,2 | IGGVQQDTILAEGLHFR         | 17 | 618,67 | 1852,98 |
| 15422 | IPI00009507 | 71,2 | 71,2 | TVTATFGYPFR               | 11 | 630,32 | 1258,63 |
| 23685 | IPI00414320 | 70,3 | 70,3 | GVGTDEACLIEILASR          | 16 | 852,44 | 1702,86 |
| 19640 | IPI00068430 | 50,5 | 50,5 | V(M)VQPINLIFR             | 11 | 673,39 | 1344,76 |
| 18347 | IPI00018768 | 69,9 | 69,9 | EAVTEILGIEPDR             | 13 | 721,38 | 1440,74 |
| 13711 | IPI00550069 | 51,6 | 51,6 | VNPALAEINLR               | 11 | 605,35 | 1208,69 |
| 12046 | IPI00550069 | 40,3 | 40,3 | ELCQGLGQPGSVLR            | 14 | 757,39 | 1512,77 |
| 28605 | IPI00293533 | 47,9 | 47,9 | ELEDLLSPLEELVK            | 14 | 813,95 | 1625,88 |
| 14715 | IPI00289758 | 33,9 | 33,9 | RPTEICADPQFIIGGATR        | 18 | 668,01 | 2001,01 |
| 18437 | IPI00096066 | 68,7 | 68,7 | FFVADTANEALEAAK           | 15 | 798,90 | 1595,78 |
| 7548  | IPI00333215 | 68,5 | 68,5 | TGGTQTDLFTCGK             | 13 | 693,32 | 1384,63 |
| 6891  | IPI00299155 | 36   | 36   | TTIFSPEGR                 | 9  | 504,26 | 1006,51 |
| 18567 | IPI00299155 | 40   | 40   | LLDEVFFSEK                | 10 | 613,82 | 1225,62 |
| 13321 | IPI00141318 | 60,7 | 60,7 | LEGLGSSEADQDGLASTVR       | 19 | 952,96 | 1903,91 |
| 16717 | IPI00005657 | 41,6 | 41,6 | ETLAQLQQEFQR              | 12 | 745,88 | 1489,75 |
| 20917 | IPI00005657 | 42,8 | 42,8 | EELALLDGSNVVFK            | 14 | 767,41 | 1532,81 |
| 15137 | IPI00013891 | 66,5 | 66,5 | YGPLSGVNVVYDQR            | 14 | 783,90 | 1565,78 |
| 10746 | IPI00787396 | 50,9 | 50,9 | LLLLGAGESGK               | 11 | 529,31 | 1056,61 |
| 13279 | IPI00026167 | 66,3 | 66,3 | LLDLVQQSCNYK              | 12 | 740,88 | 1479,74 |
| 18667 | IPI00015891 | 65,7 | 65,7 | NLQEEIDALESR              | 12 | 708,85 | 1415,69 |

|       |             |      |      |                                |    |         |         |
|-------|-------------|------|------|--------------------------------|----|---------|---------|
| 18340 | IPI00005614 | 65,6 | 65,6 | LTTLELLEVR                     | 10 | 593,86  | 1185,70 |
| 24072 | IPI00217143 | 65,6 | 65,6 | AGLPCQDLEFVQFHPTGIYGAGCLITEGCR | 30 | 1122,86 | 3365,57 |
| 17405 | IPI00027285 | 65,4 | 65,4 | VLGLVLLR                       | 8  | 441,81  | 881,61  |
| 5973  | IPI00021129 | 64,8 | 64,8 | LLQ(M)QPAQHGEIHK               | 14 | 541,30  | 1620,87 |
| 26240 | IPI00000684 | 64,2 | 64,2 | FVFDIFQFAK                     | 10 | 631,33  | 1260,65 |
| 7158  | IPI00456969 | 66   | 66   | LGGSPFGPAGTGK                  | 13 | 573,30  | 1144,59 |
| 15437 | IPI00216256 | 53,2 | 53,2 | LYSILGTTLK                     | 10 | 554,83  | 1107,65 |
| 28212 | IPI00420014 | 63,9 | 63,9 | DILCGAADEVLAVLK                | 15 | 793,93  | 1585,84 |
| 16452 | IPI00008982 | 63,5 | 63,5 | GPVGLEGLLTK                    | 12 | 592,85  | 1183,68 |
| 22727 | IPI00000495 | 63,3 | 63,3 | DPNAFLFDHLLTLKPVK              | 17 | 656,70  | 1967,09 |
| 5092  | IPI00010865 | 63,2 | 63,2 | GIAQ(M)LEK                     | 8  | 453,24  | 904,47  |
| 11379 | IPI00442278 | 45,9 | 45,9 | FINEVLR                        | 7  | 445,76  | 889,50  |
| 19525 | IPI00032140 | 37   | 37   | LYGPSSVSFADDFVR                | 15 | 830,40  | 1658,79 |
| 31208 | IPI00032140 | 45,9 | 45,9 | DQAVENILVSPVVVASSLGLVSLGGK     | 26 | 851,15  | 2550,42 |
| 9531  | IPI00010153 | 43,8 | 43,8 | LPAAGVGD(M)V(M)ATVK            | 15 | 746,38  | 1490,75 |
| 20490 | IPI00010153 | 43,8 | 43,8 | ISLGLPVGAVINCADNTGAK           | 20 | 985,52  | 1969,03 |
| 5540  | IPI00005161 | 53,1 | 53,1 | VF(M)QEFK                      | 7  | 472,73  | 943,45  |
| 6626  | IPI00064328 | 62,4 | 62,4 | YSQYQQAIYK                     | 10 | 646,32  | 1290,62 |
| 8991  | IPI00100656 | 62,3 | 62,3 | HYEVEILDAK                     | 10 | 608,81  | 1215,61 |
| 21107 | IPI00024175 | 62,3 | 62,3 | AITVFSPDGHLFQVEYAQEAVK         | 22 | 817,08  | 2448,23 |
| 10139 | IPI00299000 | 42,1 | 42,1 | EGEFVAQFK                      | 9  | 527,76  | 1053,51 |
| 13796 | IPI00299000 | 48,1 | 48,1 | ITSGPFEPDLYK                   | 12 | 683,85  | 1365,68 |
| 4797  | IPI00010706 | 41,9 | 41,9 | SDY(M)FQR                      | 7  | 481,71  | 961,40  |
| 9456  | IPI00010706 | 40,5 | 40,5 | AIENELLAR                      | 9  | 514,79  | 1027,57 |
| 18787 | IPI00029750 | 60,9 | 60,9 | TTGFG(M)IYDSL DYAK             | 15 | 849,39  | 1696,77 |
| 5035  | IPI00008918 | 60,5 | 60,5 | VGVLAAS(M)EAK                  | 11 | 546,29  | 1090,57 |
| 20230 | IPI00029468 | 46,8 | 46,8 | DQLQTFSEEHPVLLTEAPLNPR         | 22 | 845,43  | 2533,28 |
| 10809 | IPI00010810 | 47,6 | 47,6 | LGGEVSCLVAGTK                  | 13 | 645,84  | 1289,66 |
| 20677 | IPI00375631 | 59,7 | 59,7 | VPLASQGLGPGSTVLLVVDK           | 20 | 975,57  | 1949,12 |
| 21162 | IPI00034319 | 44,6 | 44,6 | TQSSLVPAL TDFVR                | 14 | 767,42  | 1532,82 |

|       |             |      |      |                        |    |        |         |
|-------|-------------|------|------|------------------------|----|--------|---------|
| 18930 | IPI00061525 | 59,2 | 59,2 | ITLECLPQNVGFYK         | 14 | 841,44 | 1680,86 |
| 24950 | IPI00004656 | 58,6 | 58,6 | SNFLNCYVSGFHPSDIEVDLLK | 22 | 852,08 | 2553,22 |
| 21632 | IPI00220365 | 58,3 | 58,3 | EAVGDLLDAFK            | 11 | 589,31 | 1176,60 |
| 12286 | IPI00014938 | 62,8 | 62,8 | FGLNVSSISR             | 10 | 540,30 | 1078,58 |
| 13171 | IPI00000051 | 43,3 | 43,3 | LADIQIEQLNR            | 11 | 656,86 | 1311,71 |
| 6426  | IPI00247583 | 58,1 | 58,1 | HGVVPLATY(M)R          | 11 | 630,33 | 1258,65 |
| 13929 | IPI00004902 | 58   | 58   | VDLVLLGK               | 8  | 428,78 | 855,54  |
| 12829 | IPI00220113 | 40   | 40   | ALPLEAEVAPVK           | 12 | 618,86 | 1235,71 |
| 25302 | IPI00009071 | 57,8 | 57,8 | YGPIVDVYVPLDFYTR       | 16 | 958,99 | 1915,97 |
| 23297 | IPI00022977 | 57,7 | 57,7 | FCTGLTQIETLFK          | 13 | 779,40 | 1556,79 |
| 6941  | IPI00020599 | 57,6 | 57,6 | VHVIFNYK               | 8  | 510,29 | 1018,56 |
| 5820  | IPI00413778 | 57,3 | 57,3 | RGQTCVVHYTG(M)LEDGK    | 17 | 656,31 | 1965,90 |
| 21232 | IPI00793199 | 57,3 | 57,3 | GAGTDEGCLIEILASR       | 16 | 831,41 | 1660,81 |
| 7226  | IPI00219160 | 33,7 | 33,7 | IVYLYTK                | 7  | 450,27 | 898,52  |
| 7798  | IPI00219160 | 42   | 42   | AFLIEEQK               | 8  | 489,27 | 976,52  |
| 18422 | IPI00008557 | 56,9 | 56,9 | LYIGNLNESVTPADLEK      | 17 | 938,49 | 1874,96 |
| 23097 | IPI00019472 | 56,6 | 56,6 | EVLDSFLDLAR            | 11 | 639,34 | 1276,67 |
| 4465  | IPI00027434 | 49,6 | 49,6 | EVFE(M)ATR             | 8  | 499,73 | 997,45  |
| 7411  | IPI00167953 | 39,2 | 39,2 | LFVIGGK                | 7  | 367,23 | 732,45  |
| 24587 | IPI00009236 | 56,2 | 56,2 | IDFEDVIAEPEGTHSFDGIWK  | 21 | 802,38 | 2404,12 |
| 11571 | IPI00221093 | 37,2 | 37,2 | VCEEIAIIPSK            | 11 | 629,84 | 1257,66 |
| 19575 | IPI00183603 | 56   | 56   | VPFLVLECPNLK           | 12 | 714,90 | 1427,79 |
| 7361  | IPI00029623 | 53,4 | 53,4 | HITIFSPEGR             | 10 | 578,81 | 1155,60 |
| 16045 | IPI00029623 | 31,2 | 31,2 | LLDSSTVTHLFK           | 12 | 454,25 | 1359,74 |
| 13969 | IPI00183695 | 39,8 | 39,8 | EFPGFLENQK             | 10 | 604,80 | 1207,59 |
| 18897 | IPI00018140 | 29,3 | 29,3 | NLANTVTEEILEK          | 13 | 737,39 | 1472,77 |
| 23792 | IPI00018140 | 40,1 | 40,1 | EFNEDGALAVLQQFK        | 15 | 854,93 | 1707,85 |
| 27927 | IPI00550364 | 39,4 | 39,4 | ELNELVSAIEEHFFQPQK     | 18 | 720,03 | 2157,07 |
| 23162 | IPI00303207 | 55   | 55   | ADIF(M)FDEPSSYLDVK     | 16 | 946,93 | 1891,85 |
| 19155 | IPI00012442 | 54,5 | 54,5 | SSSPAPADIAQTVQEDLR     | 18 | 942,97 | 1883,92 |

|       |             |      |      |                               |    |         |         |
|-------|-------------|------|------|-------------------------------|----|---------|---------|
| 18522 | IPI00296053 | 48,4 | 48,4 | VAALTGLPFVTAPNK               | 15 | 749,93  | 1497,85 |
| 19565 | IPI00395887 | 53,2 | 53,2 | DFINFISDK                     | 9  | 549,78  | 1097,54 |
| 21422 | IPI00013679 | 42,4 | 42,4 | IFYPEIEEVQALDDTER             | 17 | 1034,00 | 2065,98 |
| 15197 | IPI00005031 | 37,5 | 37,5 | IALITVTDK                     | 9  | 487,30  | 972,59  |
| 28182 | IPI00221240 | 52,4 | 52,4 | ANLINNIFELAGLGK               | 15 | 793,95  | 1585,88 |
| 16047 | IPI00021728 | 52   | 52   | TSFVNFTDICK                   | 11 | 666,32  | 1330,62 |
| 7066  | IPI00719633 | 43,2 | 43,2 | FSSVQLR                       | 7  | 418,73  | 835,45  |
| 9354  | IPI00555956 | 51,8 | 51,8 | TQNP(M)VTGTSVLGVK             | 15 | 774,41  | 1546,80 |
| 15782 | IPI00790262 | 43   | 43   | AENFFILR                      | 8  | 505,28  | 1008,54 |
| 32238 | IPI00012998 | 46,9 | 46,9 | AVSDASAGDYGSAIETLVTAISLIK     | 25 | 818,10  | 2451,27 |
| 15055 | IPI00442073 | 51,4 | 51,4 | GFGFGQGAGALVHSE               | 15 | 717,34  | 1432,67 |
| 10059 | IPI00302840 | 51,3 | 51,3 | LNIPVSQVNPR                   | 11 | 618,86  | 1235,70 |
| 20077 | IPI00396321 | 29   | 29   | LVTLPVSFAQLK                  | 12 | 658,40  | 1314,79 |
| 15827 | IPI00396321 | 32,6 | 32,6 | LVNLQHLDLLNNK                 | 13 | 511,96  | 1532,87 |
| 26162 | IPI00018873 | 31,4 | 31,4 | GDLEEYQDLLHTVFK               | 16 | 621,98  | 1862,90 |
| 19645 | IPI00018873 | 39,5 | 39,5 | STQAPLIIRPDSGNPLDTVLK         | 21 | 745,75  | 2234,23 |
| 19822 | IPI00013452 | 49,6 | 49,6 | INEAVECLLSLK                  | 12 | 694,88  | 1387,74 |
| 31868 | IPI00337736 | 48,9 | 48,9 | ET(M)SVSLNQTVTQLQQLQAVNQQLT   | 27 | 1020,54 | 3058,59 |
| 21395 | IPI00030243 | 48,6 | 48,6 | LLELDSFLK                     | 9  | 539,31  | 1076,61 |
| 16705 | IPI00006723 | 48,5 | 48,5 | HELLLGAGSGPGAGQQATPGALLQAGPPR | 30 | 950,51  | 2848,50 |
| 16092 | IPI00641582 | 48,5 | 48,5 | VQGLEQAVDNFEGK                | 14 | 767,38  | 1532,75 |
| 31168 | IPI00023234 | 34   | 34   | LQADDFLQDYTLLINILHSEDLGK      | 24 | 925,48  | 2773,41 |
| 9356  | IPI00030131 | 47,7 | 47,7 | YGVNPGPIVGTTR                 | 13 | 665,86  | 1329,70 |
| 6013  | IPI00219840 | 47,7 | 47,7 | HTNFVEFR                      | 8  | 525,26  | 1048,51 |
| 24752 | IPI00029264 | 47,4 | 47,4 | HGGEDYVFSLLTGYCEPPTGVSLR      | 24 | 885,42  | 2653,25 |
| 18520 | IPI00008380 | 47,4 | 47,4 | YSFLQFDPAPR                   | 11 | 670,84  | 1339,66 |
| 19745 | IPI00021831 | 47   | 47   | LTVADALEPVQFEDGQK             | 17 | 930,47  | 1858,93 |
| 25985 | IPI00022143 | 46,9 | 46,9 | LLVPLVPDLQDVAQLR              | 16 | 597,02  | 1788,05 |
| 20890 | IPI00430812 | 35,5 | 35,5 | GFQFVSSSLPDICYR               | 15 | 888,42  | 1774,83 |
| 12376 | IPI00012340 | 46,4 | 46,4 | IYVGNLPTDVR                   | 11 | 623,84  | 1245,67 |

|                   |      |                                          |    |         |         |
|-------------------|------|------------------------------------------|----|---------|---------|
| 13734 IPI00005537 | 42,9 | 42,9 NYIQGINLVQAK                        | 12 | 680,88  | 1359,75 |
| 12759 IPI00031169 | 46,3 | 46,3 TASNVEEAFINTAK                      | 14 | 747,88  | 1493,74 |
| 19477 IPI00013676 | 45,9 | 45,9 NYDIGAALDTIQYSK                     | 15 | 836,41  | 1670,82 |
| 6838 IPI00328257  | 45,7 | 45,7 YNDPIYVK                            | 8  | 506,26  | 1010,51 |
| 18382 IPI00023919 | 45,6 | 45,6 IDILDSALLRPGR                       | 13 | 480,28  | 1437,83 |
| 29618 IPI00020042 | 45,4 | 45,4 ENAPAIIFIDEIDAIATK                  | 18 | 648,68  | 1943,02 |
| 21320 IPI00550894 | 45,3 | 45,3 YFTLGLPTGSTPLGCKYK                  | 17 | 937,97  | 1873,93 |
| 12621 IPI00008494 | 33,8 | 33,8 VTL(N)GVPAQPLGPR                    | 14 | 710,40  | 1418,79 |
| 20387 IPI00008494 | 33,5 | 33,5 DGTFFPLPIGESVTVTR                   | 16 | 844,95  | 1687,88 |
| 15130 IPI00550917 | 44,5 | 44,5 ETIELVHTEPTDVAQLPSR                 | 19 | 712,37  | 2134,09 |
| 23452 IPI00019385 | 44,4 | 44,4 NNEDISIIPPLFTVSVDHR                 | 19 | 722,71  | 2165,11 |
| 19252 IPI00017704 | 37,4 | 37,4 YDGSTIVPGEQGAEYQHFIQQCTDDVR         | 27 | 1038,47 | 3112,38 |
| 12346 IPI00219953 | 44,1 | 44,1 YGYTHLSAGELLR                       | 13 | 493,92  | 1478,75 |
| 24287 IPI00219029 | 43,9 | 43,9 IANDNSLNHEYLPILGLAEFR               | 21 | 800,42  | 2398,23 |
| 15012 IPI00215911 | 41   | 41 EEAPDILCLQETK                         | 13 | 773,38  | 1544,74 |
| 4572 IPI00219575  | 43,7 | 43,7 EHVKPLFN(M)EDK                      | 12 | 501,58  | 1501,72 |
| 31900 IPI00024466 | 43,7 | 43,7 ILFLDVLFPVVVDK                      | 14 | 815,99  | 1629,97 |
| 28377 IPI00032406 | 43,6 | 43,6 LSELEDLLPSRPEVP(N)IIGETEEVELQEFDSTR | 33 | 1262,30 | 3783,88 |
| 22617 IPI00301058 | 43,5 | 43,5 VKEEIEAFVQELR                       | 14 | 568,32  | 1701,93 |
| 7536 IPI00295813  | 43,2 | 43,2 YSLGTGIR                            | 8  | 433,74  | 865,47  |
| 19012 IPI00026546 | 43,2 | 43,2 IIVLGLLPR                           | 9  | 497,34  | 992,67  |
| 19517 IPI00026970 | 43,1 | 43,1 EELEFEVPPFR                         | 10 | 647,82  | 1293,62 |
| 19877 IPI00294962 | 43,1 | 43,1 IDLAGSSLSGILDK                      | 14 | 694,88  | 1387,75 |
| 11294 IPI00382869 | 43   | 43 LTVAVAFR                              | 8  | 438,77  | 875,52  |
| 21152 IPI00300074 | 42,5 | 42,5 LFEISDIVIK                          | 10 | 588,85  | 1175,68 |
| 32263 IPI00012578 | 42,1 | 42,1 DAQVVQVVLDGLSNILK                   | 17 | 604,35  | 1810,02 |
| 25450 IPI00008998 | 33,8 | 33,8 VELSDVQNPAISITENVLHFK               | 21 | 785,09  | 2352,23 |
| 20297 IPI00024403 | 41   | 41 DIVQFVPPFR                            | 9  | 560,81  | 1119,61 |
| 24222 IPI00030702 | 40,4 | 40,4 ENTEGEYSGIEHVIVDGVVQSIK             | 23 | 834,75  | 2501,23 |
| 23457 IPI00025974 | 39,7 | 39,7 NLEISGPETVPLPNVPSIALPSKPAK          | 27 | 927,86  | 2780,57 |

|       |             |      |      |                            |    |        |         |
|-------|-------------|------|------|----------------------------|----|--------|---------|
| 13834 | IPI00022314 | 39,2 | 39,2 | GDVTAQIALQPALK             | 14 | 712,91 | 1423,80 |
| 26142 | IPI00017855 | 39,1 | 39,1 | DINQEVYNFLATAGAK           | 16 | 585,30 | 1752,87 |
| 17425 | IPI00025273 | 39,1 | 39,1 | ENLISALEEAK                | 11 | 608,82 | 1215,63 |
| 4380  | IPI00465233 | 36,2 | 36,2 | LYTT(M)PVAK                | 9  | 520,28 | 1038,54 |
| 6100  | IPI00027497 | 36,5 | 36,5 | NLVTEDV(M)R                | 9  | 546,77 | 1091,53 |
| 5353  | IPI00029731 | 38,4 | 38,4 | V(M)LYPSR                  | 7  | 441,23 | 880,45  |
| 23352 | IPI00024364 | 38,3 | 38,3 | ICEDSAEILDSVDLDRPLNI(M)IPK | 24 | 924,80 | 2771,38 |
| 15337 | IPI00005202 | 38,1 | 38,1 | DFSLEQLR                   | 8  | 504,26 | 1006,51 |
| 21567 | IPI00103525 | 42,3 | 42,3 | LFVGNLPTDITEEDFK           | 16 | 919,46 | 1836,91 |
| 20292 | IPI00025057 | 37,8 | 37,8 | YLNTNPVGGLLEYAR            | 15 | 840,44 | 1678,87 |
| 25385 | IPI00025084 | 37,7 | 37,7 | ILGGVISAISEAAAQYNPEPPPPR   | 24 | 816,44 | 2446,29 |
| 19742 | IPI00787885 | 37,4 | 37,4 | GLDVDSLVIHQVNK             | 16 | 593,66 | 1777,96 |
| 6213  | IPI00383751 | 33,5 | 33,5 | EPAVYFK                    | 7  | 427,23 | 852,44  |
| 22342 | IPI00300371 | 37   | 37   | LGAVFNQVAFPLQYTPR          | 17 | 961,02 | 1920,02 |
| 8106  | IPI00163187 | 31,4 | 31,4 | LSCFAQTVSPA EK             | 13 | 719,36 | 1436,70 |
| 14867 | IPI00216008 | 36,6 | 36,6 | LQFHDVAGDIFHQQCK           | 16 | 486,49 | 1941,91 |
| 31323 | IPI00016249 | 36,2 | 36,2 | GFLEFVEDFIQVPR             | 14 | 565,96 | 1694,86 |
| 18922 | IPI00059366 | 36,2 | 36,2 | GVTIASGGVLPNIHPELLAK       | 20 | 662,72 | 1985,13 |
| 24507 | IPI00004839 | 36,1 | 36,1 | IGDQEFDHLPALLEFYK          | 17 | 679,01 | 2034,01 |
| 20722 | IPI00015838 | 36,1 | 36,1 | ELLEQISAFDNVPR             | 14 | 815,93 | 1629,84 |
| 10036 | IPI00218342 | 36,1 | 36,1 | TPVPSDIDISR                | 11 | 600,32 | 1198,62 |
| 7921  | IPI00002521 | 36,1 | 36,1 | FEVIEKPQA                  | 9  | 530,79 | 1059,56 |
| 30080 | IPI00026665 | 35,7 | 35,7 | ECGVGVIVTPE(Q)IEEAVEAAINR  | 23 | 828,75 | 2483,23 |
| 26277 | IPI00030363 | 35,6 | 35,6 | TPIGSFLGSLLLPATK           | 17 | 851,49 | 1700,97 |
| 22287 | IPI00011126 | 35,6 | 35,6 | VAEEHAPSIVFIDEIDAIGTK      | 21 | 752,06 | 2253,15 |
| 8099  | IPI00168262 | 35,5 | 35,5 | TPAYIPR                    | 8  | 465,77 | 929,53  |
| 10381 | IPI00412579 | 35,5 | 35,5 | FSVCVLGDQQHCDEAK           | 16 | 631,61 | 1891,82 |
| 11136 | IPI00011268 | 35,4 | 35,4 | SNIDALLSR                  | 9  | 494,77 | 987,53  |
| 6050  | IPI00216237 | 35,3 | 35,3 | YP(M)AVGLNK                | 9  | 504,76 | 1007,51 |
| 8634  | IPI00028055 | 35,2 | 35,2 | LKPLEVELR                  | 9  | 366,23 | 1095,67 |



|                   |      |                                    |    |         |         |
|-------------------|------|------------------------------------|----|---------|---------|
| 6786 IPI00014151  | 35,1 | 35,1 EGALTAFR                      | 8  | 432,73  | 863,45  |
| 8101 IPI00013949  | 35   | 35 (M)GLALSSLNK                    | 10 | 525,29  | 1048,56 |
| 5900 IPI00022694  | 34,9 | 34,9 (M)TISQQEFGR                  | 10 | 606,79  | 1211,56 |
| 28225 IPI00000856 | 34,5 | 34,5 TSTILGDITSIPELADYIK           | 19 | 1025,55 | 2049,09 |
| 15657 IPI00103994 | 34,2 | 34,2 GTGVVTSVPSDSPDDIAALR          | 20 | 979,00  | 1955,98 |
| 22332 IPI00024664 | 34,2 | 34,2 IVILPDYLEIAR                  | 12 | 707,92  | 1413,82 |
| 21622 IPI00455153 | 34,1 | 34,1 SVFFGPDFITVTK                 | 13 | 729,39  | 1456,76 |
| 15690 IPI00006252 | 34   | 34 ITFDAFPGEPAK                    | 12 | 668,82  | 1335,63 |
| 7733 IPI00171199  | 33,9 | 33,9 IYIVHDEVK                     | 10 | 614,85  | 1227,69 |
| 7678 IPI00306398  | 33,6 | 33,6 LYVIGTGER                     | 9  | 504,28  | 1006,54 |
| 30908 IPI00234368 | 33,1 | 33,1 E(N)ILFG(M)GNPLLDISAVVDKDFLDK | 25 | 927,48  | 2779,41 |
| 6135 IPI00010271  | 33   | 33 HHCPNTPHILVGTK                  | 14 | 529,62  | 1585,84 |
| 14675 IPI00019770 | 32,6 | 32,6 FVNVVPTFGK                    | 10 | 554,31  | 1106,61 |
| 30693 IPI00413587 | 32,5 | 32,5 DLATALEQLLQAYPR               | 15 | 567,98  | 1700,90 |
| 6028 IPI00019359  | 32,2 | 32,2 IKFE(M)EQNLR                  | 10 | 441,90  | 1322,67 |
| 15407 IPI00794530 | 32,2 | 32,2 LIIVASQA(M)R                  | 10 | 559,32  | 1116,62 |
| 11911 IPI00647337 | 32   | 32 VFQFLNAK                        | 8  | 483,77  | 965,53  |
| 12901 IPI00003833 | 31,9 | 31,9 GLFTGLTPR                     | 9  | 481,28  | 960,54  |
| 28287 IPI00156374 | 31,9 | 31,9 LFSFLYQSSPDQVIDVAPELLR        | 22 | 846,45  | 2536,32 |
| 6906 IPI00024229  | 31,6 | 31,6 Q(M)AVGSGLR                   | 9  | 467,74  | 933,47  |
| 19447 IPI00037448 | 31,3 | 31,3 IAAAGLDVTSPEPLPTNHPLLTLK      | 24 | 823,46  | 2467,37 |
| 11616 IPI00215790 | 30,8 | 30,8 DFLLTAR                       | 7  | 418,24  | 834,46  |
| 13031 IPI00645194 | 30,6 | 30,6 IGFGSFVEK                     | 9  | 492,26  | 982,51  |
| 8181 IPI00099463  | 30,3 | 30,3 VAI(Q)FLK                     | 7  | 410,25  | 818,49  |
| 24212 IPI00455033 | 29,9 | 29,9 APVDFGYVVGIDSILEQ(M)R         | 18 | 1013,50 | 2024,99 |
| 12869 IPI00026570 | 29,8 | 29,8 GGVADALLYR                    | 10 | 517,79  | 1033,56 |
| 19237 IPI00000643 | 29,6 | 29,6 LLESLDQLELR                   | 11 | 664,88  | 1327,74 |
| 20995 IPI00219034 | 29,3 | 29,3 PGIVELPTLEELK                 | 13 | 719,41  | 1436,81 |
| 23527 IPI00027493 | 29,3 | 29,3 LLTSFLPAQLLR                  | 12 | 686,42  | 1370,83 |
| 18590 IPI00219483 | 29,3 | 29,3 DPIPYPPEK                     | 11 | 641,36  | 1280,70 |

|                   |      |                                 |    |        |         |
|-------------------|------|---------------------------------|----|--------|---------|
| 23405 IPI00012535 | 30,9 | 30,9 ITFHGEGDQEPGLEPGDIIIVLDQK  | 25 | 907,46 | 2719,37 |
| 25122 IPI00029997 | 30,6 | 30,6 LPIPESQVITINPELPVEEAAEDYAK | 26 | 955,83 | 2864,47 |

## Suppl Table 6: May Low LET Peptides

| Scan# | IPI000000#  | Score# | Top score | Sequence                           | Pep.Lengt | m/z     | Neutral mass (exp) |
|-------|-------------|--------|-----------|------------------------------------|-----------|---------|--------------------|
| 5901  | IPI00418471 | 75,6   | 75,6      | LQEEMLQR                           | 8         | 523,77  | 1045,52            |
| 14401 | IPI00418471 | 42,5   | 42,5      | DNLAEDIMR                          | 9         | 538,76  | 1075,50            |
| 7142  | IPI00418471 | 95,8   | 95,8      | FADLSEAANR                         | 10        | 547,27  | 1092,52            |
| 7495  | IPI00418471 | 76,7   | 76,7      | VELQELNDR                          | 9         | 558,29  | 1114,56            |
| 8644  | IPI00418471 | 57,7   | 57,7      | VELQEL(N)DR                        | 9         | 558,78  | 1115,55            |
| 11978 | IPI00418471 | 74,2   | 74,2      | EYQDLLNVK                          | 9         | 561,30  | 1120,58            |
| 18657 | IPI00418471 | 91,5   | 91,5      | ILLAELEQLK                         | 10        | 585,36  | 1168,71            |
| 7787  | IPI00418471 | 80,7   | 80,7      | LGDLYEEE(M)R                       | 10        | 635,78  | 1269,55            |
| 11540 | IPI00418471 | 68,1   | 68,1      | NLQEAEWYK                          | 10        | 655,31  | 1308,60            |
| 8964  | IPI00418471 | 84,7   | 84,7      | EEAENTLQSF                         | 11        | 662,31  | 1322,61            |
| 19625 | IPI00418471 | 83,7   | 83,7      | VESLQEEIAFLK                       | 12        | 469,26  | 1404,75            |
| 8574  | IPI00418471 | 86,8   | 86,8      | SLYASSPGGVYATR                     | 14        | 714,86  | 1427,70            |
| 12528 | IPI00418471 | 92,3   | 92,3      | QVQSLTCEVDALK                      | 13        | 745,88  | 1489,74            |
| 16444 | IPI00418471 | 94,9   | 94,9      | KVESLQEEIAFLK                      | 13        | 511,96  | 1532,85            |
| 24690 | IPI00418471 | 72,8   | 72,8      | ISLPLPNFSSLNLR                     | 14        | 785,95  | 1569,89            |
| 25795 | IPI00418471 | 54,8   | 54,8      | ISLPLP(N)FSSLNLR                   | 14        | 786,44  | 1570,87            |
| 12620 | IPI00418471 | 78,3   | 78,3      | ETNLDSLPLVDTHSK                    | 15        | 834,93  | 1667,84            |
| 6572  | IPI00418471 | 68     | 68        | DGQVINETSQHDDLE                    | 16        | 918,90  | 1835,79            |
| 27440 | IPI00418471 | 82,1   | 82,1      | LLQDSVDFSLADAINTEFK                | 19        | 1063,54 | 2125,06            |
| 27915 | IPI00418471 | 33,2   | 33,2      | LL(Q)DSVDFSLADAINTEFK              | 19        | 1064,04 | 2126,06            |
| 17372 | IPI00418471 | 80,7   | 80,7      | E(M)EENFAVEAANYQDTIGR              | 19        | 1101,98 | 2201,95            |
| 24063 | IPI00418471 | 95,9   | 95,9      | LHEEEIQELQAQIQEQHVQIDVDVSKPDLTAALR | 34        | 981,51  | 3922,00            |
| 6770  | IPI00472102 | 32,1   | 32,1      | LSDGVAVLK                          | 9         | 451,27  | 900,53             |
| 15714 | IPI00472102 | 92,8   | 92,8      | EIGNIISDAMK                        | 11        | 595,81  | 1189,60            |
| 11110 | IPI00472102 | 92,5   | 92,5      | TVIIQSWGSPK                        | 12        | 672,86  | 1343,71            |
| 19015 | IPI00472102 | 86,2   | 86,2      | TLNDELEIIEG(M)K                    | 13        | 760,88  | 1519,74            |
| 18372 | IPI00472102 | 94     | 94        | AAVEEGIVLGGGCALLR                  | 17        | 842,96  | 1683,90            |
| 19325 | IPI00472102 | 95,6   | 95,6      | ISSIQSIVPALEIANAHR                 | 18        | 640,36  | 1918,06            |
| 19967 | IPI00472102 | 92,8   | 92,8      | ISSIQSIVPALEIA(N)AHR               | 18        | 640,69  | 1919,05            |
| 30053 | IPI00472102 | 70,9   | 70,9      | AL(M)LQGVDLLADAVAVTMGPK            | 21        | 710,38  | 2128,13            |
| 28998 | IPI00472102 | 92,5   | 92,5      | ALMLQGVDLLADAVAVT(M)GPK            | 21        | 710,38  | 2128,13            |

|       |             |      |      |                                  |    |         |         |
|-------|-------------|------|------|----------------------------------|----|---------|---------|
| 27163 | IPI00472102 | 87,5 | 87,5 | AL(M)LQGVDLLADAVAVT(M)GPK        | 21 | 715,71  | 2144,12 |
| 14554 | IPI00472102 | 31,4 | 31,4 | QSKPVTTPEEIAQVATISA(N)GDK        | 23 | 795,74  | 2384,20 |
| 36974 | IPI00472102 | 65,1 | 65,1 | TALLDAAGVASLLTTAEVVVTEIPK        | 25 | 828,14  | 2481,39 |
| 34076 | IPI00472102 | 78,4 | 78,4 | TALLDAAGVASLLTTAEVVVTEIPKEEK     | 28 | 956,86  | 2867,57 |
| 28898 | IPI00472102 | 40,8 | 40,8 | D(M)AIATGGAVFGEEGLTLNLEDVQPHDLGK | 30 | 1038,51 | 3112,50 |
| 14033 | IPI00479186 | 56,4 | 56,4 | GIFPVLCK                         | 8  | 467,26  | 932,52  |
| 8150  | IPI00479186 | 54,6 | 54,6 | VNFAMNVGK                        | 9  | 490,25  | 978,50  |
| 5291  | IPI00479186 | 81,4 | 81,4 | VNFA(M)NVGK                      | 9  | 498,25  | 994,49  |
| 10011 | IPI00479186 | 43   | 43   | ITLDNAYMEK                       | 10 | 599,29  | 1196,57 |
| 11485 | IPI00479186 | 59,8 | 59,8 | LDIDSPITAR                       | 11 | 599,33  | 1196,64 |
| 9061  | IPI00479186 | 54,3 | 54,3 | CCSGAIIVLTK                      | 11 | 611,32  | 1220,62 |
| 9284  | IPI00479186 | 97,6 | 97,6 | NTGHICTIGPASR                    | 13 | 680,36  | 1358,70 |
| 19497 | IPI00479186 | 95,7 | 95,7 | IYVDDGLISLQVK                    | 13 | 731,91  | 1461,81 |
| 16914 | IPI00479186 | 99,1 | 99,1 | GVNLPGAAVDLPAVSEK                | 17 | 818,95  | 1635,88 |
| 13268 | IPI00479186 | 82   | 82   | KGVNLPGAAVDLPAVSEK               | 18 | 589,00  | 1763,98 |
| 19087 | IPI00479186 | 61,1 | 61,1 | GADFLVTEVENGGSLGSK               | 18 | 890,44  | 1778,87 |
| 19772 | IPI00479186 | 78   | 78   | GADFLVTEVE(N)GGSLGSK             | 18 | 890,93  | 1779,85 |
| 28773 | IPI00479186 | 82,9 | 82,9 | FGVEQDVD(M)VFASFIR               | 16 | 625,97  | 1874,89 |
| 22603 | IPI00479186 | 72,8 | 72,8 | LAPITSDPTEATAVGAVEASFK           | 22 | 1088,06 | 2174,11 |
| 20937 | IPI00479186 | 54,8 | 54,8 | TATESFASDPILYRPVAVALDTK          | 23 | 822,44  | 2464,29 |
| 15231 | IPI00011654 | 61,5 | 61,5 | YLTVAAVFR                        | 9  | 520,30  | 1038,59 |
| 7532  | IPI00011654 | 71   | 71   | ISVYYNEATGGK                     | 12 | 651,32  | 1300,63 |
| 10436 | IPI00011654 | 43,4 | 43,4 | I(M)NTFSVVPSPK                   | 12 | 668,35  | 1334,69 |
| 5768  | IPI00011654 | 90,8 | 90,8 | EVDEQ(M)LNVQNK                   | 12 | 731,85  | 1461,68 |
| 18345 | IPI00011654 | 98,1 | 98,1 | AILVDLEPGTMDSVR                  | 15 | 808,42  | 1614,83 |
| 15296 | IPI00011654 | 95,7 | 95,7 | AILVDLEPGT(M)DSVR                | 15 | 816,42  | 1630,82 |
| 21153 | IPI00011654 | 98,8 | 98,8 | ALTVPELTQQVFDK                   | 15 | 830,45  | 1658,89 |
| 19990 | IPI00011654 | 61,2 | 61,2 | NSSYFVEWIPNNVK                   | 14 | 848,92  | 1695,83 |
| 20782 | IPI00011654 | 47,2 | 47,2 | NSSYFVEWIP(N)NVK                 | 14 | 849,41  | 1696,81 |
| 20782 | IPI00011654 | 47,2 | 47,2 | NSSYFVEWIP(N)VK                  | 14 | 849,41  | 1696,81 |
| 24120 | IPI00011654 | 68   | 68   | (M)AVTFIGNSTAIQELFK              | 17 | 943,49  | 1884,97 |
| 26403 | IPI00011654 | 59,8 | 59,8 | (M)AVTFIG(N)STAIQELFK            | 17 | 943,98  | 1885,95 |

|       |             |      |      |                                    |    |         |         |
|-------|-------------|------|------|------------------------------------|----|---------|---------|
| 26363 | IPI00011654 | 50,7 | 50,7 | LTTPTYGDLNHLVSATMSGVTTCLR          | 25 | 903,45  | 2707,33 |
| 22733 | IPI00011654 | 95,8 | 95,8 | LTTPTYGDLNHLVSAT(M)SGVTTCLR        | 25 | 908,78  | 2723,33 |
| 24053 | IPI00011654 | 30,2 | 30,2 | SGPFGQIFRPDNFVFGQSGAGNNWAK         | 26 | 933,45  | 2797,34 |
| 24803 | IPI00011654 | 76,4 | 76,4 | SGPFGQIFRPDNFVFGQSGAG(N)NWAK       | 26 | 933,78  | 2798,32 |
| 20695 | IPI00011654 | 61,2 | 61,2 | FWEVISDEHGIDPTGTYHGDSDLQLDR        | 27 | 1034,81 | 3101,40 |
| 19855 | IPI00011654 | 73,9 | 73,9 | EAESCDCLQGFQLTHSLGGGTGSG(M)GTLLISK | 32 | 1109,85 | 3326,52 |
| 14494 | IPI00021439 | 47,2 | 47,2 | DLTDYL(M)K                         | 8  | 507,74  | 1013,47 |
| 6432  | IPI00021439 | 46,9 | 46,9 | GYSFTTTAER                         | 10 | 566,77  | 1131,52 |
| 8669  | IPI00021439 | 64,7 | 64,7 | EITALAPSTMK                        | 11 | 581,31  | 1160,61 |
| 6282  | IPI00021439 | 91,5 | 91,5 | EITALAPST(M)K                      | 11 | 589,31  | 1176,61 |
| 7700  | IPI00021439 | 73,1 | 73,1 | IWHHTFYNELR                        | 11 | 505,92  | 1514,74 |
| 6127  | IPI00021439 | 89,5 | 89,5 | QEYDESGPSIVHR                      | 13 | 758,85  | 1515,69 |
| 8904  | IPI00021439 | 60,8 | 60,8 | IWHHTFY(N)ELR                      | 11 | 506,25  | 1515,73 |
| 18760 | IPI00021439 | 94,9 | 94,9 | SYELPDGQVITIGNER                   | 16 | 895,95  | 1789,88 |
| 19737 | IPI00021439 | 51,2 | 51,2 | SYELPDGQVITIG(N)ER                 | 16 | 896,44  | 1790,87 |
| 15669 | IPI00021439 | 49,1 | 49,1 | YPIEHGIVTNWDDMEK                   | 16 | 649,64  | 1945,89 |
| 12453 | IPI00021439 | 90,9 | 90,9 | VAPEEHPVLLTEAPLNPK                 | 18 | 977,53  | 1953,05 |
| 12850 | IPI00021439 | 99,3 | 99,3 | YPIEHGIVTNWDD(M)EK                 | 16 | 981,95  | 1961,88 |
| 21733 | IPI00021439 | 68   | 68   | DLYANTVLSGGTMYPGIADR               | 21 | 1108,04 | 2214,06 |
| 19500 | IPI00021439 | 86,5 | 86,5 | DLYANTVLSGGT(M)YPGIADR             | 21 | 744,36  | 2230,06 |
| 15119 | IPI00021439 | 52,9 | 52,9 | KDLYANTVLSGGT(M)YPGIADR            | 22 | 787,06  | 2358,15 |
| 19712 | IPI00021439 | 42,8 | 42,8 | TTGIV(M)DSGDGVTHTVPIYEGYALPHAILR   | 30 | 800,66  | 3198,60 |
| 9714  | IPI00465248 | 40,1 | 40,1 | YDLDFK                             | 6  | 400,69  | 799,38  |
| 5783  | IPI00465248 | 32,7 | 32,7 | Y(N)QLLR                           | 6  | 404,22  | 806,43  |
| 7482  | IPI00465248 | 44,4 | 44,4 | SC(N)CLLLK                         | 8  | 504,75  | 1007,48 |
| 5751  | IPI00465248 | 69,7 | 69,7 | LMIE(M)DGTENK                      | 11 | 648,79  | 1295,57 |
| 4690  | IPI00465248 | 76,9 | 76,9 | L(M)IE(M)DGTENK                    | 11 | 656,79  | 1311,57 |
| 15189 | IPI00465248 | 90,5 | 90,5 | GNPTVEVDLFTSK                      | 13 | 703,86  | 1405,71 |
| 18987 | IPI00465248 | 92,7 | 92,7 | VVIG(M)DVAASEFFR                   | 14 | 778,89  | 1555,77 |
| 12808 | IPI00465248 | 95,3 | 95,3 | V(N)QIGSVTESLQACK                  | 15 | 817,91  | 1633,80 |
| 12808 | IPI00465248 | 95,3 | 95,3 | VN(Q)IGSVTESLQACK                  | 15 | 817,91  | 1633,80 |
| 19477 | IPI00465248 | 65,8 | 65,8 | AAVPSGASTGIYEALRLR                 | 18 | 902,98  | 1803,94 |

|       |             |      |      |                                     |    |         |         |
|-------|-------------|------|------|-------------------------------------|----|---------|---------|
| 30123 | IPI00465248 | 54,2 | 54,2 | SGETEDTFIADLVVGLCTGQIK              | 22 | 785,06  | 2352,15 |
| 22123 | IPI00465248 | 69,7 | 69,7 | HIADLAGNSEVILPVPAF(N)VINGGSHAGNK    | 30 | 753,89  | 3011,55 |
| 22123 | IPI00465248 | 69,7 | 69,7 | HIADLAGNSEVILPVPAFNVI(N)GGSHAGNK    | 30 | 753,89  | 3011,55 |
| 23360 | IPI00465248 | 56,2 | 56,2 | HIADLAG(N)SEVILPVPAFNVI(N)GGSHAGNK  | 30 | 1005,18 | 3012,53 |
| 14696 | IPI00003865 | 30,3 | 30,3 | FELTGIPPAPR                         | 11 | 599,33  | 1196,66 |
| 16214 | IPI00003865 | 95,6 | 95,6 | DAGTIAGLNVLR                        | 12 | 600,34  | 1198,67 |
| 5116  | IPI00003865 | 96,2 | 96,2 | VEIANDQGNR                          | 11 | 614,82  | 1227,62 |
| 8000  | IPI00003865 | 34,7 | 34,7 | (M)VNHFIAEFK                        | 10 | 417,88  | 1250,61 |
| 17607 | IPI00003865 | 77,4 | 77,4 | FEELNADLFR                          | 10 | 627,31  | 1252,61 |
| 5926  | IPI00003865 | 82,8 | 82,8 | FDDAVVQSD(M)K                       | 11 | 635,78  | 1269,55 |
| 5266  | IPI00003865 | 33,4 | 33,4 | RFDDAVVQSD(M)K                      | 12 | 476,23  | 1425,66 |
| 10940 | IPI00003865 | 93,2 | 93,2 | TTPSYVAFTDTER                       | 13 | 744,35  | 1486,69 |
| 16039 | IPI00003865 | 79,2 | 79,2 | SFYPEEVSS(M)VLTk                    | 14 | 816,90  | 1631,78 |
| 17169 | IPI00003865 | 73,7 | 73,7 | IINEPTAAAIAYGLDK                    | 16 | 553,97  | 1658,89 |
| 6397  | IPI00003865 | 86,5 | 86,5 | STAGDTHLGGEDFDNR                    | 16 | 564,58  | 1690,72 |
| 16684 | IPI00003865 | 52,5 | 52,5 | TVTNAVVTVPAYFNDSQR                  | 18 | 991,50  | 1980,99 |
| 17867 | IPI00003865 | 48,3 | 48,3 | TVTNAVVTVPAYF(N)DSQR                | 18 | 991,99  | 1981,97 |
| 26063 | IPI00003865 | 88,1 | 88,1 | SINPDEAVAYGAAVQAAILSGDK             | 23 | 754,05  | 2259,14 |
| 18317 | IPI00003865 | 61   | 61   | GPAVGIDLGTTYSCVGVFQHGK              | 22 | 755,04  | 2262,11 |
| 8596  | IPI00387144 | 38,1 | 38,1 | FDL(M)YAK                           | 7  | 452,22  | 902,42  |
| 9929  | IPI00387144 | 82,5 | 82,5 | DVNAAIATIK                          | 10 | 508,29  | 1014,57 |
| 19957 | IPI00387144 | 84,3 | 84,3 | EIIDLVLDR                           | 9  | 543,31  | 1084,61 |
| 7132  | IPI00387144 | 49,1 | 49,1 | LDHKFDL(M)YAK                       | 11 | 466,24  | 1395,69 |
| 13388 | IPI00387144 | 64,6 | 64,6 | QLFHPEQLITGK                        | 12 | 470,93  | 1409,77 |
| 21848 | IPI00387144 | 92,3 | 92,3 | AVFVDLEPTVIDEVR                     | 15 | 567,97  | 1700,90 |
| 10775 | IPI00387144 | 54,8 | 54,8 | NLDIERPTYTNLNR                      | 14 | 573,63  | 1717,87 |
| 18040 | IPI00387144 | 67,4 | 67,4 | IHFPLATYAPVISA EK                   | 16 | 586,33  | 1755,96 |
| 16084 | IPI00387144 | 61   | 61   | VGINYQPPTVVPGGDLAK                  | 18 | 913,00  | 1823,98 |
| 17619 | IPI00387144 | 71,1 | 71,1 | AVC(M)LSNTTAIAEAWAR                 | 17 | 940,95  | 1879,89 |
| 26540 | IPI00387144 | 74,7 | 74,7 | FDGALNVDLTEFQTNLVPYPR               | 21 | 1205,11 | 2408,20 |
| 16089 | IPI00387144 | 46,8 | 46,8 | AYHEQLSVAEIT(N)ACFEPANQ(M)VK        | 24 | 923,10  | 2766,26 |
| 27353 | IPI00387144 | 46,9 | 46,9 | LADQCTGLQGFLVFHSFGGGTGS GFTSLL(M)ER | 32 | 1136,21 | 3405,61 |

|       |             |      |      |                                     |    |         |         |
|-------|-------------|------|------|-------------------------------------|----|---------|---------|
| 27325 | IPI00387144 | 32,9 | 32,9 | LAD(Q)CTGLQGFLVFHSGGGTSGGFTSLL(M)ER | 32 | 1136,54 | 3406,60 |
| 20963 | IPI00180675 | 89,6 | 89,6 | TIQFVDWCPTGFK                       | 13 | 799,89  | 1597,76 |
| 11455 | IPI00219018 | 74   | 74   | GALQNIIPASTGAAK                     | 15 | 706,40  | 1410,78 |
| 13498 | IPI00219018 | 96,6 | 96,6 | VPTANVSVDLTCR                       | 14 | 765,90  | 1529,79 |
| 21028 | IPI00219018 | 88,5 | 88,5 | LIVINGNPITIFQER                     | 14 | 807,45  | 1612,89 |
| 21910 | IPI00219018 | 98,7 | 98,7 | LVI(N)GNPITIFQER                    | 14 | 807,95  | 1613,88 |
| 22063 | IPI00219018 | 85,1 | 85,1 | LIVING(N)PITIFQER                   | 14 | 538,97  | 1613,88 |
| 19112 | IPI00219018 | 70,9 | 70,9 | LISWYDNEFGYSNR                      | 14 | 882,41  | 1762,80 |
| 11322 | IPI00219018 | 49,4 | 49,4 | IISNASCTT(N)CLAPLAK                 | 17 | 917,96  | 1833,90 |
| 27098 | IPI00219018 | 63,1 | 63,1 | VIHDNFGIVEGLMTTVHAITATQK            | 24 | 649,59  | 2594,35 |
| 24158 | IPI00219018 | 53,1 | 53,1 | VIHDNFGIVEGL(M)TTVHAITATQK          | 24 | 653,59  | 2610,35 |
| 4538  | IPI00302592 | 64,4 | 64,4 | NDNDTFTVK                           | 9  | 527,25  | 1052,48 |
| 10910 | IPI00302592 | 55,8 | 55,8 | SPFEVYVDK                           | 9  | 542,27  | 1082,53 |
| 5226  | IPI00302592 | 60,5 | 60,5 | GTVEPQLEAR                          | 10 | 550,29  | 1098,57 |
| 13130 | IPI00302592 | 65,9 | 65,9 | LDVQFSGLTK                          | 10 | 554,31  | 1106,60 |
| 11652 | IPI00302592 | 49,2 | 49,2 | AWGPGLEGGVVGK                       | 13 | 613,83  | 1225,65 |
| 24065 | IPI00302592 | 89,6 | 89,6 | LIALLEVLSQK                         | 11 | 613,89  | 1225,76 |
| 8774  | IPI00302592 | 52   | 52   | YGGQPVPNFPSK                        | 12 | 645,83  | 1289,64 |
| 7592  | IPI00302592 | 32,7 | 32,7 | VEPGLGADNSVVR                       | 13 | 656,85  | 1311,68 |
| 9791  | IPI00302592 | 32,7 | 32,7 | WGDEHIPGSPYR                        | 12 | 471,89  | 1412,65 |
| 14295 | IPI00302592 | 81,8 | 81,8 | IANLQTDLSDGLR                       | 13 | 708,38  | 1414,74 |
| 10817 | IPI00302592 | 88,5 | 88,5 | EAGAGGLAIAVEGPSK                    | 16 | 713,88  | 1425,75 |
| 7027  | IPI00302592 | 70   | 70   | AFGPGLQGGSAGSPAR                    | 16 | 715,36  | 1428,71 |
| 6837  | IPI00302592 | 31,8 | 31,8 | AGNN(M)LLVGVHGPR                    | 14 | 484,26  | 1449,75 |
| 4223  | IPI00302592 | 62,9 | 62,9 | (M)DCQECPEGYR                       | 11 | 730,77  | 1459,52 |
| 12260 | IPI00302592 | 84,6 | 84,6 | VNQPASFAVSL(N)GAK                   | 15 | 752,39  | 1502,77 |
| 10356 | IPI00302592 | 49,2 | 49,2 | FADQHVPGPSFVSVK                     | 14 | 505,92  | 1514,75 |
| 5598  | IPI00302592 | 65   | 65   | FVPAE(M)GTHTVSVK                    | 14 | 759,88  | 1517,75 |
| 18190 | IPI00302592 | 58,2 | 58,2 | SPFSVAVSPSLDLSK                     | 15 | 767,41  | 1532,81 |
| 10234 | IPI00302592 | 78,3 | 78,3 | GAGTGGLGLAVEGPSEAK                  | 18 | 785,91  | 1569,80 |
| 8284  | IPI00302592 | 99,8 | 99,8 | TGVAVNKPAEFTVDAK                    | 16 | 549,63  | 1645,87 |
| 17487 | IPI00302592 | 39,4 | 39,4 | TFSVWYVPEVTGTHK                     | 15 | 584,30  | 1749,87 |



|                   |      |                                         |    |         |         |
|-------------------|------|-----------------------------------------|----|---------|---------|
| 17664 IPI00302592 | 30,6 | 30,6 VTYTP(M)APGSYLISIK                 | 16 | 878,96  | 1755,91 |
| 9384 IPI00302592  | 38,8 | 38,8 DVDIIDHHDNTYTVK                    | 15 | 595,62  | 1783,84 |
| 17157 IPI00302592 | 60,5 | 60,5 VTYCPTPEPGNYIINIK                  | 16 | 941,47  | 1880,93 |
| 7672 IPI00302592  | 74   | 74 THEAEIVEGENHTYCIR                    | 17 | 686,65  | 2056,93 |
| 12575 IPI00302592 | 72,6 | 72,6 LVSNSHSLHETSSVFDVSLTK              | 20 | 734,05  | 2199,12 |
| 13205 IPI00302592 | 84,4 | 84,4 VHSPSGALEECYVTEIDQDK               | 20 | 759,68  | 2276,03 |
| 16146 IPI00302592 | 83,4 | 83,4 YTPVQQGPVGVNVTYGGDPIPK             | 22 | 1143,59 | 2285,17 |
| 14491 IPI00302592 | 52,3 | 52,3 GQHVPGPSFQFTVGPLGEGGAHK            | 23 | 576,79  | 2303,15 |
| 12500 IPI00302592 | 63   | 63 SAGQGEVLVYVEDPAGHQEEAK               | 22 | 771,70  | 2312,09 |
| 15871 IPI00302592 | 30,4 | 30,4 VSGQGLHEGHTFEPAEFIIDTR             | 22 | 610,80  | 2439,18 |
| 18680 IPI00302592 | 50,3 | 50,3 FNEEHIPDSPFVVPVASPSGDAR            | 23 | 823,07  | 2466,18 |
| 19802 IPI00302592 | 57,4 | 57,4 FGGEHVPNSPFQVTALAGDQPSVQPPLR       | 28 | 982,50  | 2944,48 |
| 24205 IPI00302592 | 70,9 | 70,9 EEGPYEVEVTYDGVVPVPGSPFPLEAVAPTKPSK | 33 | 1162,58 | 3484,73 |
| 13548 IPI00334775 | 32,2 | 32,2 ALLFIPR                            | 7  | 415,27  | 828,52  |
| 4758 IPI00334775  | 47,9 | 47,9 YESLTDPSK                          | 9  | 520,25  | 1038,49 |
| 16309 IPI00334775 | 61,1 | 61,1 APFDLFENK                          | 9  | 540,77  | 1079,53 |
| 5473 IPI00334775  | 73,5 | 73,5 YIDQEELNK                          | 9  | 576,28  | 1150,55 |
| 14173 IPI00334775 | 37,7 | 37,7 ADLI(N)NLGTIAK                     | 12 | 622,35  | 1242,68 |
| 6137 IPI00334775  | 82,3 | 82,3 EQVANSASFVER                       | 11 | 625,31  | 1248,61 |
| 7007 IPI00334775  | 33,2 | 33,2 EQVA(N)SAFVER                      | 11 | 625,80  | 1249,59 |
| 11320 IPI00334775 | 98,3 | 98,3 HLEINPDHPIVETLR                    | 15 | 594,99  | 1781,94 |
| 19740 IPI00334775 | 92,2 | 92,2 HSQFIGYPITLYLEK                    | 15 | 603,66  | 1807,95 |
| 15306 IPI00334775 | 97   | 97 NPDDITQEEYGEFYK                      | 15 | 924,40  | 1846,79 |
| 9036 IPI00334775  | 37,7 | 37,7 YHTSQSGDE(M)TSLSEYVSR              | 19 | 731,65  | 2191,93 |
| 27720 IPI00334775 | 60,2 | 60,2 VFI(M)DSCDELIPEYLNFR               | 19 | 1195,57 | 2389,13 |
| 23740 IPI00334775 | 94,6 | 94,6 GFEVVYMTEPIDEYCVQQLK               | 20 | 1224,58 | 2447,14 |
| 7600 IPI00007752  | 46,7 | 46,7 INVYYNEATGGK                       | 12 | 664,83  | 1327,64 |
| 13683 IPI00007752 | 98,2 | 98,2 AVLVDLEPGT(M)DSVR                  | 15 | 809,41  | 1616,81 |
| 16484 IPI00007752 | 30,2 | 30,2 ALTVPELTQQ(M)FDAK                  | 15 | 854,43  | 1706,85 |
| 5826 IPI00418169  | 80,8 | 80,8 AYTNFDAER                          | 9  | 543,75  | 1085,48 |
| 9144 IPI00418169  | 52,2 | 52,2 QDIAFAYQR                          | 9  | 556,28  | 1110,55 |
| 5241 IPI00418169  | 85,3 | 85,3 TNQELQEINR                         | 10 | 622,81  | 1243,61 |

|                   |      |                                  |    |         |         |
|-------------------|------|----------------------------------|----|---------|---------|
| 20948 IPI00418169 | 73,6 | 73,6 SYSPYDMLESIR                | 12 | 730,84  | 1459,67 |
| 14769 IPI00418169 | 44,4 | 44,4 SYSPYD(M)LESIR              | 12 | 738,84  | 1475,66 |
| 23555 IPI00418169 | 39,4 | 39,4 GVDEVTIVNILTNR              | 14 | 771,93  | 1541,84 |
| 25913 IPI00418169 | 97,6 | 97,6 SALSGHLETVILGLLK            | 16 | 551,00  | 1649,97 |
| 24193 IPI00418169 | 95,2 | 95,2 GLGTDEDSLIEIICSR            | 16 | 889,44  | 1776,86 |
| 9029 IPI00418169  | 59,9 | 59,9 LSLEGDHSTPPSAYGSVK          | 18 | 615,64  | 1843,89 |
| 15409 IPI00418169 | 54,3 | 54,3 RAEDGSVIDYELIDQDAR          | 18 | 689,00  | 2063,98 |
| 31168 IPI00418169 | 99,5 | 99,5 GDLENAFLNLVQCIQNKPLYFADR    | 24 | 946,81  | 2837,41 |
| 5453 IPI00220740  | 99,2 | 99,2 VDNDENEHQLSLR               | 13 | 784,87  | 1567,72 |
| 24743 IPI00220740 | 51,8 | 51,8 MTDQEAIQDLWQWR              | 14 | 910,43  | 1818,84 |
| 22970 IPI00220740 | 80,8 | 80,8 (M)TDQEAIQDLWQWR            | 14 | 918,42  | 1834,83 |
| 21203 IPI00220740 | 61,4 | 61,4 DELHIVEAEAMNYEGSPIK         | 19 | 715,68  | 2144,01 |
| 19557 IPI00220740 | 99,4 | 99,4 DELHIVEAEA(M)NYEGSPIK       | 19 | 1081,01 | 2160,01 |
| 25578 IPI00220740 | 96,6 | 96,6 MSVQPTVSLGGFEITPPVVLR       | 21 | 1114,11 | 2226,21 |
| 24888 IPI00220740 | 84,7 | 84,7 (M)SVQPTVSLGGFEITPPVVLR     | 21 | 748,41  | 2242,20 |
| 5141 IPI00186290  | 43,5 | 43,5 YFDPA(N)GK                  | 8  | 456,71  | 911,40  |
| 8614 IPI00186290  | 47,4 | 47,4 GVQYLNEIK                   | 9  | 532,29  | 1062,57 |
| 10665 IPI00186290 | 82,1 | 82,1 VNFTVDQIR                   | 9  | 546,30  | 1090,58 |
| 12835 IPI00186290 | 41   | 41 VFDAI(M)NFK                   | 9  | 550,78  | 1099,54 |
| 11818 IPI00186290 | 47,1 | 47,1 VFSGLVSTGLK                 | 11 | 554,32  | 1106,63 |
| 8514 IPI00186290  | 63,6 | 63,6 EDLYLKPIQR                  | 10 | 637,86  | 1273,70 |
| 21463 IPI00186290 | 52,1 | 52,1 EGIPALDNFLDK                | 12 | 666,35  | 1330,68 |
| 9639 IPI00186290  | 78,5 | 78,5 DLEEDHACIPIK                | 12 | 720,34  | 1438,67 |
| 27705 IPI00186290 | 95,2 | 95,2 EGIPALDNFLDKL               | 13 | 722,89  | 1443,76 |
| 24718 IPI00186290 | 85,7 | 85,7 TFCQLILDPIFK                | 12 | 747,90  | 1493,80 |
| 25390 IPI00186290 | 94,1 | 94,1 IWCFGPDGTGPNILTDITK         | 19 | 1053,02 | 2104,03 |
| 26673 IPI00186290 | 92,6 | 92,6 ALLELQLEPEELYQTFQR          | 18 | 740,72  | 2219,15 |
| 34496 IPI00186290 | 32,5 | 32,5 DGAGFLINLIDSPGHVDFSSEVTAALR | 27 | 934,47  | 2800,40 |
| 31273 IPI00186290 | 31,7 | 31,7 LMEPIYLVEIQCPVVGVIYGVVLR    | 26 | 997,19  | 2988,54 |
| 29805 IPI00186290 | 77,1 | 77,1 L(M)EPIYLVEIQCPVVGVIYGVVLR  | 26 | 752,14  | 3004,54 |
| 6117 IPI00419585  | 46,3 | 46,3 TEWLDGK                     | 7  | 424,71  | 847,41  |
| 16604 IPI00419585 | 71,2 | 71,2 VSFELFADK                   | 9  | 528,27  | 1054,53 |

|                   |      |                                      |    |        |         |
|-------------------|------|--------------------------------------|----|--------|---------|
| 13863 IPI00419585 | 78,8 | 78,8 FEDENFILK                       | 9  | 577,79 | 1153,56 |
| 7810 IPI00419585  | 57,6 | 57,6 EGMNIVEA(M)ER                   | 11 | 647,79 | 1293,57 |
| 10154 IPI00419585 | 71,6 | 71,6 EG(M)NIVEAMER                   | 11 | 647,79 | 1293,57 |
| 4936 IPI00419585  | 76,8 | 76,8 EG(M)NIVEA(M)ER                 | 11 | 655,79 | 1309,56 |
| 16967 IPI00419585 | 34,4 | 34,4 IIPGFMCQGGDFTR                  | 14 | 799,88 | 1597,74 |
| 13753 IPI00419585 | 60,3 | 60,3 IIPGF(M)CQGGDFTR                | 14 | 807,87 | 1613,73 |
| 25983 IPI00419585 | 99,3 | 99,3 VNPTVFFDIAVDGEPLGR              | 18 | 973,50 | 1944,99 |
| 20147 IPI00419585 | 49,2 | 49,2 HTGPGILSMANAGPNT(N)GSQFFICTAK   | 27 | 931,44 | 2791,31 |
| 20147 IPI00419585 | 49,2 | 49,2 HTGPGILSMANAGPNTNGS(Q)FFICTAK   | 27 | 931,44 | 2791,31 |
| 17457 IPI00419585 | 89,3 | 89,3 HTGPGILS(M)ANAGPNT(N)GSQFFICTAK | 27 | 936,77 | 2807,30 |
| 11903 IPI00020101 | 49,4 | 49,4 LLLPGELAK                       | 9  | 477,30 | 952,60  |
| 9004 IPI00020101  | 54,6 | 54,6 ESYSVYVYK                       | 9  | 569,28 | 1136,54 |
| 6239 IPI00020101  | 72,5 | 72,5 KESYSVYVYK                      | 10 | 633,32 | 1264,63 |
| 26190 IPI00020101 | 68,5 | 68,5 AMGIMNSFVNDIFER                 | 15 | 872,41 | 1742,81 |
| 24678 IPI00020101 | 97   | 97 A(M)GIMNSFVNDIFER                 | 15 | 880,41 | 1758,81 |
| 22615 IPI00020101 | 92,9 | 92,9 AMGI(M)NSFVNDIFER               | 15 | 880,41 | 1758,81 |
| 23755 IPI00020101 | 65,3 | 65,3 AMGI(M)(N)SFVNDIFER             | 15 | 880,90 | 1759,79 |
| 22258 IPI00020101 | 67,1 | 67,1 A(M)GIMNSFV(N)DIFER             | 15 | 880,90 | 1759,79 |
| 24105 IPI00020101 | 73,2 | 73,2 A(M)GIM(N)SFVNDIFER             | 15 | 880,90 | 1759,79 |
| 20747 IPI00020101 | 43,7 | 43,7 AMGI(M)NSFV(N)DIFER             | 15 | 880,90 | 1759,79 |
| 20325 IPI00020101 | 90,3 | 90,3 A(M)GI(M)NSFVNDIFER             | 15 | 888,41 | 1774,80 |
| 18597 IPI00020101 | 48,6 | 48,6 A(M)GI(M)NSFV(N)DIFER           | 15 | 888,90 | 1775,79 |
| 21410 IPI00020101 | 72,6 | 72,6 A(M)GI(M)(N)SFVNDIFER           | 15 | 888,90 | 1775,79 |
| 7310 IPI00003935  | 80,5 | 80,5 KESYSIYVYK                      | 10 | 640,33 | 1278,65 |
| 20912 IPI00003362 | 56,8 | 56,8 FEELNMDLFR                      | 10 | 657,31 | 1312,61 |
| 13428 IPI00003362 | 63,2 | 63,2 NELESYAYSLK                     | 11 | 658,82 | 1315,63 |
| 16569 IPI00003362 | 64   | 64 FEELN(M)DLFR                      | 10 | 665,31 | 1328,61 |
| 16847 IPI00003362 | 83,2 | 83,2 ELEEIVQPIISK                    | 12 | 699,40 | 1396,78 |
| 21070 IPI00003362 | 38   | 38 TFAPEEISAMVLTK                    | 14 | 768,90 | 1535,79 |
| 12918 IPI00003362 | 66   | 66 ITPSYVAFTPEGER                    | 14 | 783,89 | 1565,77 |
| 8160 IPI00003362  | 84,7 | 84,7 TKPYIQVDIGGGQTK                 | 15 | 802,93 | 1603,86 |
| 12125 IPI00003362 | 35,2 | 35,2 VTHAVVTVPAYFNDAQR               | 17 | 630,00 | 1886,96 |

|       |             |      |      |                                 |    |         |         |
|-------|-------------|------|------|---------------------------------|----|---------|---------|
| 4428  | IPI00396378 | 54,5 | 54,5 | LTDCVV(M)R                      | 8  | 505,24  | 1008,47 |
| 6604  | IPI00396378 | 57,8 | 57,8 | GGNFGFGDSR                      | 10 | 507,23  | 1012,44 |
| 10369 | IPI00396378 | 44,8 | 44,8 | DYFEEYGK                        | 8  | 525,72  | 1049,43 |
| 7900  | IPI00396378 | 32,2 | 32,2 | TLETVPLER                       | 9  | 529,30  | 1056,58 |
| 14884 | IPI00396378 | 96   | 96   | IDTIEITDR                       | 10 | 594,83  | 1187,64 |
| 7145  | IPI00396378 | 75,6 | 75,6 | GGGGNFGPGPGSNFR                 | 15 | 689,32  | 1376,62 |
| 17542 | IPI00396378 | 66,3 | 66,3 | GFGFVTFDDHDPVDK                 | 15 | 565,93  | 1694,76 |
| 7382  | IPI00396378 | 46,9 | 46,9 | N(M)GGPYGGGNYGPGGSGGSGGYGGR     | 25 | 735,97  | 2204,89 |
| 7017  | IPI00794605 | 53,5 | 53,5 | YDNEFGYSNR                      | 10 | 632,76  | 1263,52 |
| 5843  | IPI00013508 | 47,5 | 47,5 | I(M)SIVDPNR                     | 9  | 530,78  | 1059,54 |
| 8316  | IPI00013508 | 29,1 | 29,1 | NYIT(M)DELR                     | 9  | 585,78  | 1169,54 |
| 16774 | IPI00013508 | 60,3 | 60,3 | EGLLLWCQR                       | 9  | 587,81  | 1173,60 |
| 19110 | IPI00013508 | 52,3 | 52,3 | DLLLDPAWEK                      | 10 | 600,32  | 1198,62 |
| 23405 | IPI00013508 | 56,4 | 56,4 | LASDLLEWIR                      | 10 | 608,34  | 1214,67 |
| 9781  | IPI00013508 | 80,3 | 80,3 | LAILGIHNEVSK                    | 12 | 647,38  | 1292,74 |
| 6634  | IPI00013508 | 68   | 68   | DHSGTLGPEEFK                    | 12 | 658,81  | 1315,60 |
| 24978 | IPI00013508 | 97,3 | 97,3 | VGWEQLLTTIAR                    | 12 | 693,89  | 1385,77 |
| 13080 | IPI00013508 | 88,6 | 88,6 | TINEVENQILTR                    | 12 | 715,39  | 1428,76 |
| 4906  | IPI00013508 | 31,1 | 31,1 | LSNRPAF(M)PSEGR                 | 13 | 493,25  | 1476,71 |
| 5431  | IPI00013508 | 88,9 | 88,9 | HEAFESDLAAHQDR                  | 14 | 542,58  | 1624,72 |
| 25443 | IPI00013508 | 50,6 | 50,6 | LLETIDQLYLEYAK                  | 14 | 571,31  | 1710,91 |
| 4348  | IPI00013508 | 83,5 | 83,5 | KHEAFESDLAAHQDR                 | 15 | 439,21  | 1752,82 |
| 22285 | IPI00013508 | 34,3 | 34,3 | IDQLEGDHQLIQEALIFDNK            | 20 | 780,40  | 2338,18 |
| 4453  | IPI00396485 | 34,9 | 34,9 | EVSTYIK                         | 7  | 420,23  | 838,44  |
| 9439  | IPI00396485 | 66,5 | 66,5 | LPLQDVYK                        | 8  | 488,28  | 974,54  |
| 8474  | IPI00396485 | 36,8 | 36,8 | IGGIGTVPVGR                     | 11 | 513,31  | 1024,60 |
| 12285 | IPI00396485 | 49,9 | 49,9 | EHALLAYTLGVK                    | 12 | 657,87  | 1313,73 |
| 10309 | IPI00396485 | 82,8 | 82,8 | YYVTIIDAPGHR                    | 12 | 468,91  | 1403,72 |
| 20040 | IPI00396485 | 79,1 | 79,1 | VETGVLKPGMVVTFAPVNVTTTEVK       | 24 | 839,13  | 2514,38 |
| 18255 | IPI00396485 | 98,9 | 98,9 | VETGVLKPG(M)VVTFAPVNVTTTEVK     | 24 | 844,46  | 2530,37 |
| 35389 | IPI00396485 | 61,8 | 61,8 | N(M)ITGTSQADCAVLIVAAGVGEFEAGISK | 29 | 975,81  | 2924,42 |
| 21160 | IPI00396485 | 56,2 | 56,2 | SGDAAIVDMVPGKP(M)CVESFSDYPPLGR  | 28 | 1004,47 | 3010,39 |

|       |             |      |      |                                  |    |         |         |
|-------|-------------|------|------|----------------------------------|----|---------|---------|
| 25608 | IPI00396485 | 95,5 | 95,5 | DGNASGTTLLEALDCILPPTRPTDKPLR     | 28 | 1007,86 | 3020,56 |
| 26763 | IPI00396485 | 71,3 | 71,3 | DG(N)ASGTTLLEALDCILPPTRPTDKPLR   | 28 | 1008,19 | 3021,54 |
| 18637 | IPI00396485 | 39,8 | 39,8 | SGDAAIVD(M)VPGKP(M)CVESFSDYPPLGR | 28 | 1009,80 | 3026,38 |
| 22735 | IPI00396485 | 60,7 | 60,7 | KDGNASGTTLLEALDCILPPTRPTDKPLR    | 29 | 788,17  | 3148,66 |
| 15741 | IPI00021428 | 81,3 | 81,3 | YPIEHGIITNWDDMEK                 | 16 | 980,96  | 1959,90 |
| 12968 | IPI00021428 | 51,9 | 51,9 | YPIEHGIITNWDD(M)EK               | 16 | 988,96  | 1975,90 |
| 9904  | IPI00024067 | 38,7 | 38,7 | NLILVVR                          | 7  | 413,78  | 825,54  |
| 7285  | IPI00024067 | 53,7 | 53,7 | HELIEFR                          | 7  | 472,25  | 942,49  |
| 9276  | IPI00024067 | 32,9 | 32,9 | YIEIYVQK                         | 8  | 528,29  | 1054,57 |
| 10019 | IPI00024067 | 75,4 | 75,4 | HDVVFLITK                        | 9  | 536,31  | 1070,61 |
| 9239  | IPI00024067 | 71,3 | 71,3 | VANVELYR                         | 9  | 563,80  | 1125,58 |
| 8183  | IPI00024067 | 36,8 | 36,8 | EVCFACVDGK                       | 10 | 592,76  | 1183,50 |
| 14476 | IPI00024067 | 55,1 | 55,1 | NNLAGAEELFAR                     | 12 | 652,83  | 1303,65 |
| 23013 | IPI00024067 | 74,4 | 74,4 | NLQNLLILTAIK                     | 12 | 677,43  | 1352,84 |
| 15644 | IPI00024067 | 66,1 | 66,1 | ALEHFTDLYDIK                     | 12 | 488,92  | 1463,73 |
| 26290 | IPI00024067 | 65   | 65   | VGYPDWIFLLR                      | 12 | 740,40  | 1478,79 |
| 17627 | IPI00024067 | 71,3 | 71,3 | GQFSTDELVAEVEK                   | 14 | 776,38  | 1550,75 |
| 13010 | IPI00024067 | 96,6 | 96,6 | FNALFAQGNYSEAAK                  | 15 | 815,90  | 1629,78 |
| 29235 | IPI00024067 | 42,5 | 42,5 | FDFVHDLVLYLYR                    | 13 | 567,30  | 1698,88 |
| 18775 | IPI00024067 | 96,8 | 96,8 | TSIDAYDNFDNISLAQR                | 17 | 971,96  | 1941,91 |
| 29368 | IPI00024067 | 78,2 | 78,2 | AF(M)TADLPNELIELLEK              | 17 | 982,01  | 1962,00 |
| 20787 | IPI00024067 | 33,5 | 33,5 | KDPELWGSVLLESNPYR                | 17 | 668,35  | 2002,02 |
| 25228 | IPI00024067 | 64,6 | 64,6 | LPVVIGLLDVDCSESVIK               | 19 | 1021,05 | 2040,08 |
| 27773 | IPI00024067 | 66,1 | 66,1 | YHEQLSTQSLIELFESFK               | 18 | 733,70  | 2198,09 |
| 25713 | IPI00024067 | 90,9 | 90,9 | KFDVNTSAVQVLIHIGNLDR             | 21 | 592,82  | 2367,26 |
| 25238 | IPI00024067 | 40   | 40   | RPLIDQVVQTALSETQDPEEVSVTVK       | 26 | 961,18  | 2880,51 |
| 9641  | IPI00215965 | 57,9 | 57,9 | DYFEQYGK                         | 8  | 525,23  | 1048,45 |
| 17352 | IPI00215965 | 65,1 | 65,1 | IEVIEIMTDR                       | 10 | 609,82  | 1217,63 |
| 16804 | IPI00215965 | 96,9 | 96,9 | GFAFVTFDDHDSVDK                  | 15 | 850,38  | 1698,75 |
| 23273 | IPI00215965 | 97,9 | 97,9 | LFIGGLSFETTDESLR                 | 16 | 892,96  | 1783,90 |
| 4555  | IPI00021405 | 53,5 | 53,5 | LVEID(N)GK                       | 8  | 444,74  | 887,46  |
| 10695 | IPI00021405 | 57,4 | 57,4 | LADALQELR                        | 9  | 514,79  | 1027,57 |

|                   |      |                               |    |         |         |
|-------------------|------|-------------------------------|----|---------|---------|
| 5071 IPI00021405  | 60,9 | 60,9 SLETENAGLR               | 10 | 545,28  | 1088,55 |
| 7095 IPI00021405  | 73,1 | 73,1 EAALSTALSEK              | 11 | 560,30  | 1118,58 |
| 6624 IPI00021405  | 98,3 | 98,3 AAYEAELGDAR              | 11 | 583,28  | 1164,54 |
| 14834 IPI00021405 | 63,6 | 63,6 IDSLSAQLSQLQK            | 13 | 715,90  | 1429,78 |
| 6692 IPI00021405  | 70,4 | 70,4 SNEDQS(M)GNWQIK          | 13 | 776,84  | 1551,66 |
| 20940 IPI00021405 | 71,9 | 71,9 MQQQLDEYQELLDIK          | 15 | 947,47  | 1892,92 |
| 4403 IPI00218918  | 43,9 | 43,9 SEID(M)NDIK              | 9  | 540,75  | 1079,48 |
| 9584 IPI00218918  | 76   | 76 TPAQFDADEL R               | 11 | 631,80  | 1261,59 |
| 24780 IPI00218918 | 88   | 88 GVDEATHIDILTK              | 13 | 694,39  | 1386,76 |
| 20575 IPI00218918 | 95,3 | 95,3 GTDVNVFNTILTTR           | 14 | 775,91  | 1549,81 |
| 17992 IPI00218918 | 35,5 | 35,5 GTDVNVF(N)TILTTR         | 14 | 776,40  | 1550,79 |
| 26693 IPI00218918 | 85,9 | 85,9 ALTGHLEEVVLALLK          | 15 | 535,99  | 1604,95 |
| 21755 IPI00218918 | 70   | 70 MYGISLCQAILDETK            | 15 | 871,43  | 1740,84 |
| 20232 IPI00218918 | 74,7 | 74,7 (M)YGISLCQAILDETK        | 15 | 879,43  | 1756,84 |
| 10460 IPI00218918 | 71,5 | 71,5 AAYLQETGKPLDETLK         | 16 | 592,98  | 1775,93 |
| 15444 IPI00218918 | 51,7 | 51,7 GGPGSAVSPYPTFNPSDDVAALHK | 24 | 786,06  | 2355,15 |
| 10396 IPI00019502 | 42,9 | 42,9 RGDLPFVVPR               | 10 | 578,33  | 1154,66 |
| 12410 IPI00019502 | 35,7 | 35,7 ALELDSNLYR               | 10 | 597,31  | 1192,61 |
| 7517 IPI00019502  | 44   | 44 AGVLAHLEEER                | 11 | 612,32  | 1222,63 |
| 9664 IPI00019502  | 68,7 | 68,7 VEAQLQELQVK              | 11 | 642,86  | 1283,71 |
| 11340 IPI00019502 | 42   | 42 ADFCIIHYAGK                | 11 | 432,21  | 1293,62 |
| 17072 IPI00019502 | 76,4 | 76,4 LDPHLVLDQLR              | 11 | 440,25  | 1317,74 |
| 6043 IPI00019502  | 50,5 | 50,5 HEA(M)ITDLEER            | 11 | 680,31  | 1358,61 |
| 23903 IPI00019502 | 76,5 | 76,5 VISGVLQLGNIVFK           | 14 | 743,95  | 1485,89 |
| 7377 IPI00019502  | 75,2 | 75,2 EDQSILCTGESGAGK          | 15 | 776,35  | 1550,69 |
| 16997 IPI00019502 | 81   | 81 VSHLLGINVTDFT R            | 14 | 786,43  | 1570,85 |
| 19225 IPI00019502 | 49,1 | 49,1 NFINNPLAQADWAAK          | 15 | 836,93  | 1671,84 |
| 18560 IPI00019502 | 39,7 | 39,7 NLPIYSEEIIVE(M)YK        | 14 | 872,43  | 1742,84 |
| 14969 IPI00019502 | 64,1 | 64,1 HSQAVEELAEQLEQTK         | 16 | 613,97  | 1838,90 |
| 22873 IPI00019502 | 94,1 | 94,1 LQQELDDLLVDLDHQR         | 16 | 650,67  | 1948,99 |
| 21715 IPI00019502 | 91,9 | 91,9 IIGLDQVAG(M)SETALPGAFK   | 20 | 1017,53 | 2033,05 |
| 4598 IPI00171611  | 30,2 | 30,2 DIQLAR                   | 6  | 358,21  | 714,40  |

|                   |      |                                           |    |         |         |
|-------------------|------|-------------------------------------------|----|---------|---------|
| 6452 IPI00171611  | 62   | 62 STELLIR                                | 7  | 416,25  | 830,49  |
| 4460 IPI00171611  | 32,6 | 32,6 EIAQDFK                              | 7  | 425,72  | 849,42  |
| 32776 IPI00171611 | 97,7 | 97,7 FQSSAV(M)ALQEASEAYLVGLFEDTNLCAIHAK   | 32 | 883,18  | 3528,68 |
| 33213 IPI00171611 | 35,8 | 35,8 FQSSAV(M)ALQEASEAYLVGLFEDT(N)LCAIHAK | 32 | 883,43  | 3529,67 |
| 32753 IPI00171611 | 45,4 | 45,4 F(Q)SSAV(M)ALQEASEAYLVGLFEDTNLCAIHAK | 32 | 883,43  | 3529,69 |
| 9374 IPI00021263  | 59,8 | 59,8 NLLSVAYK                             | 8  | 454,27  | 906,52  |
| 14506 IPI00021263 | 34,2 | 34,2 (N)LLSVAYK                           | 8  | 454,76  | 907,50  |
| 5978 IPI00021263  | 63,4 | 63,4 YLAEVAAGDDK                          | 11 | 576,28  | 1150,55 |
| 23608 IPI00021263 | 83,9 | 83,9 DSTLIMQLLR                           | 10 | 595,33  | 1188,65 |
| 20935 IPI00021263 | 87,7 | 87,7 DSTLI(M)QLLR                         | 10 | 603,33  | 1204,65 |
| 26833 IPI00021263 | 70,4 | 70,4 DICNDVLSLLEK                         | 12 | 709,86  | 1417,71 |
| 20237 IPI00021263 | 64,3 | 64,3 GIVDQSQQAYQEAFEISK                   | 18 | 1021,00 | 2039,99 |
| 28818 IPI00021263 | 31,9 | 31,9 TAFDEAIAELDTLSEESYK                  | 19 | 711,34  | 2130,99 |
| 25553 IPI00023598 | 31,2 | 31,2 GHYTEGAELVDAVL DVVR                  | 18 | 648,33  | 1941,98 |
| 17862 IPI00304925 | 64,3 | 64,3 LLQDFF(N)GR                          | 9  | 555,78  | 1109,55 |
| 18490 IPI00304925 | 94,3 | 94,3 DAGVIAGLN VLR                        | 12 | 599,35  | 1196,69 |
| 6006 IPI00304925  | 71,2 | 71,2 FGDPVVQSD(M)K                        | 11 | 619,79  | 1237,56 |
| 17522 IPI00304925 | 76,6 | 76,6 FEELCSDLFR                           | 10 | 658,30  | 1314,59 |
| 12078 IPI00304925 | 91   | 91 NQVALNPQNTV FDAK                       | 15 | 829,93  | 1657,84 |
| 19155 IPI00304925 | 30,7 | 30,7 AAAIGIDLGTTYS CVGFQHGK               | 22 | 755,72  | 2264,13 |
| 12703 IPI00216691 | 54,8 | 54,8 DSPSVWAAVPGK                         | 12 | 607,31  | 1212,61 |
| 8979 IPI00216691  | 86,5 | 86,5 STGGAPTFNVT VTK                      | 14 | 690,36  | 1378,71 |
| 16154 IPI00216691 | 99,3 | 99,3 SSFYV(N)GLTLGGQK                     | 14 | 736,37  | 1470,73 |
| 21908 IPI00216691 | 86,9 | 86,9 TFDVNITPAE VGLVVGK                   | 16 | 548,65  | 1642,93 |
| 11577 IPI00789847 | 34,4 | 34,4 ALLFVPR                              | 7  | 408,26  | 814,51  |
| 17007 IPI00789847 | 79,7 | 79,7 APFDLFENR                            | 9  | 554,77  | 1107,54 |
| 7020 IPI00789847  | 33,7 | 33,7 DQVANS AFVER                         | 11 | 618,30  | 1234,59 |
| 15621 IPI00789847 | 95,8 | 95,8 TLTIVDTGIG MTK                       | 13 | 675,37  | 1348,73 |
| 12503 IPI00789847 | 95,1 | 95,1 TLTIVDTGIG(M)TK                      | 13 | 683,37  | 1364,72 |
| 20895 IPI00789847 | 81,2 | 81,2 HSQFIGYPITL FVEK                     | 15 | 593,65  | 1777,94 |
| 13193 IPI00789847 | 86   | 86 HLEINPDHSI IETLR                       | 15 | 596,32  | 1785,94 |
| 22758 IPI00646779 | 88,2 | 88,2 (M)ASTFIGN STAIQELFK                 | 17 | 937,47  | 1872,93 |

|       |             |      |                                           |    |         |         |
|-------|-------------|------|-------------------------------------------|----|---------|---------|
| 25408 | IPI00646779 | 39,2 | 39,2 (M)ASTFIG(N)STAIQELFK                | 17 | 937,96  | 1873,91 |
| 4730  | IPI00013808 | 75,7 | 75,7 HRPELIEYDK                           | 10 | 433,89  | 1298,66 |
| 5336  | IPI00013808 | 90,4 | 90,4 GISQEQ(M)QEFR                        | 11 | 684,81  | 1367,61 |
| 12913 | IPI00013808 | 80,3 | 80,3 AGTQIENIDEDFR                        | 13 | 754,35  | 1506,70 |
| 15436 | IPI00013808 | 32,7 | 32,7 KDDPVTNLNNAFEVAEK                    | 17 | 635,32  | 1902,93 |
| 24378 | IPI00013808 | 50,7 | 50,7 VEQIAAIAQELNELDYD SHNVNTR            | 25 | 969,14  | 2904,39 |
| 19870 | IPI00465028 | 55,2 | 55,2 QSLGELIGTLNAAK                       | 14 | 707,90  | 1413,78 |
| 9086  | IPI00465028 | 88,1 | 88,1 HVFGESDELIGQK                        | 13 | 729,86  | 1457,71 |
| 11787 | IPI00465028 | 86,8 | 86,8 DCGATWVVLGHSER                       | 14 | 793,87  | 1585,73 |
| 20572 | IPI00465028 | 97,7 | 97,7 VVLAYEPVWAIGTGK                      | 15 | 801,95  | 1601,88 |
| 12853 | IPI00465028 | 94,3 | 94,3 VT(N)GAFTGEISPG(M)IK                 | 16 | 819,91  | 1637,80 |
| 18575 | IPI00465028 | 46,9 | 46,9 VAHALAEGLGVIACIGEK                   | 18 | 603,33  | 1806,97 |
| 20447 | IPI00465028 | 91,8 | 91,8 VPADTEVVCAPPTAYIDFAR                 | 20 | 1096,54 | 2191,06 |
| 26408 | IPI00465028 | 59,5 | 59,5 ELASQPDVDGFLVGGASLKPEFVDIINAK        | 29 | 1010,53 | 3028,58 |
| 4503  | IPI00216049 | 71,2 | 71,2 GDDL(M)AYDR                          | 9  | 507,22  | 1012,43 |
| 7060  | IPI00216049 | 67,7 | 67,7 GSDFDCELR                            | 9  | 549,73  | 1097,44 |
| 4550  | IPI00216049 | 65,3 | 65,3 NTDE(M)VELR                          | 9  | 561,76  | 1121,50 |
| 22163 | IPI00216049 | 88,9 | 88,9 IILD LISESPIK                        | 12 | 670,91  | 1339,80 |
| 14213 | IPI00216049 | 32,8 | 32,8 LLIHQSLAGGIIGVK                      | 15 | 506,98  | 1517,93 |
| 5998  | IPI00216049 | 32,3 | 32,3 RPAEDMEEEEQAFK                       | 13 | 527,24  | 1578,70 |
| 4478  | IPI00216049 | 94,8 | 94,8 RPAED(M)EEEEQAFK                     | 13 | 532,57  | 1594,69 |
| 29185 | IPI00216049 | 43,8 | 43,8 ILSISADIETIGEILK                     | 16 | 858,00  | 1713,98 |
| 9161  | IPI00216049 | 90   | 90 TDYNASVSVPDSSGPER                      | 17 | 890,90  | 1779,79 |
| 18985 | IPI00216049 | 92,9 | 92,9 GSYGDLGGPIITTQVTIPK                  | 19 | 959,02  | 1916,03 |
| 24030 | IPI00216049 | 52,9 | 52,9 IITITGTQDQIQNAQYLLQNSVK              | 23 | 863,80  | 2588,38 |
| 22048 | IPI00216049 | 30,2 | 30,2 IITITGTQDQIQNAQYLL(Q)NSVK            | 23 | 864,13  | 2589,36 |
| 25728 | IPI00216049 | 51,6 | 51,6 IPTLEEGLQLPSPTATSQLPLESDAVECLNYQHYPK | 36 | 1014,51 | 4054,02 |
| 13448 | IPI00453473 | 54,5 | 54,5 VFLENVIR                             | 8  | 495,29  | 988,57  |
| 9741  | IPI00453473 | 57   | 57 ISGLIYEETR                             | 10 | 590,81  | 1179,61 |
| 19550 | IPI00453473 | 81,1 | 81,1 TVTAMDVVYALK                         | 12 | 655,85  | 1309,70 |
| 15224 | IPI00453473 | 99,9 | 99,9 TVTA(M)DVVYALK                       | 12 | 663,85  | 1325,69 |
| 31310 | IPI00465070 | 38,7 | 38,7 F(Q)SSAVMALQEACEAYLVGLFEDTNLCAIHAK   | 32 | 897,68  | 3586,69 |



|                   |      |                                           |    |         |         |
|-------------------|------|-------------------------------------------|----|---------|---------|
| 30633 IPI00465070 | 99,2 | 99,2 FQSSAV(M)ALQEACEAYLVGLFEDTNLCAIHAK   | 32 | 1201,57 | 3601,68 |
| 30780 IPI00465070 | 47,7 | 47,7 F(Q)SSAV(M)ALQEACEAYLVGLFEDTNLCAIHAK | 32 | 901,68  | 3602,68 |
| 12308 IPI00444262 | 63,6 | 63,6 GIAYIEFK                             | 8  | 470,76  | 939,51  |
| 8739 IPI00444262  | 67,8 | 67,8 ND LAVVDVR                           | 9  | 500,77  | 999,53  |
| 10730 IPI00444262 | 78,4 | 78,4 EVFEDAAEIR                           | 10 | 589,79  | 1177,56 |
| 6790 IPI00444262  | 99,5 | 99,5 GLSED TTEETLK                        | 12 | 661,82  | 1321,62 |
| 18100 IPI00444262 | 76   | 76 GFGFVDFNSEEDAK                         | 14 | 781,34  | 1560,67 |
| 26230 IPI00444262 | 77,3 | 77,3 VEGTEPTTAFNLFVGNLNFNK                | 21 | 1156,58 | 2311,15 |
| 8118 IPI00554648  | 34,4 | 34,4 LQAEIEGLK                            | 9  | 500,79  | 999,56  |
| 9376 IPI00554648  | 44,1 | 44,1 WSL LQQQK                            | 8  | 515,79  | 1029,56 |
| 5108 IPI00554648  | 75,4 | 75,4 AQYEDIANR                            | 9  | 540,26  | 1078,50 |
| 11347 IPI00554648 | 68,4 | 68,4 LSELEAALQR                           | 10 | 565,31  | 1128,61 |
| 5643 IPI00554648  | 52,2 | 52,2 EYQEL(M)NVK                          | 9  | 585,28  | 1168,54 |
| 4528 IPI00554648  | 56,3 | 56,3 AEAES(M)YQIK                         | 10 | 593,28  | 1184,54 |
| 21163 IPI00554648 | 38,5 | 38,5 SLDMDSIIAEVK                         | 12 | 660,84  | 1319,66 |
| 14120 IPI00554648 | 54,4 | 54,4 ASLEAAIADAEQR                        | 13 | 672,84  | 1343,67 |
| 12598 IPI00554648 | 44,5 | 44,5 TE(M)ENEFVLK                         | 11 | 684,84  | 1367,66 |
| 18380 IPI00554648 | 76,8 | 76,8 SN(M)DN(M)FESYINLR                   | 15 | 940,40  | 1878,79 |
| 25908 IPI00554648 | 38   | 38 QLYEEEIRELQSQISDTSVVLS(M)DNSR          | 27 | 1062,51 | 3184,52 |
| 10164 IPI00216457 | 59,6 | 59,6 AGLQFPVGR                            | 9  | 472,77  | 943,52  |
| 24568 IPI00216457 | 98,1 | 98,1 VTIAQGGVLPNIQAVLLPK                  | 19 | 644,39  | 1930,16 |
| 37174 IPI00216457 | 52,4 | 52,4 VGAGAPVY(M)AAVLEYLTAEILELAGNAAR      | 29 | 983,85  | 2948,52 |
| 11080 IPI00303476 | 56,2 | 56,2 IGLFGGAGVGK                          | 11 | 488,28  | 974,55  |
| 14138 IPI00303476 | 41,1 | 41,1 VVDLLAPYAK                           | 10 | 544,82  | 1087,63 |
| 7662 IPI00303476  | 76,3 | 76,3 TIA(M)DGTEGLVR                       | 12 | 639,82  | 1277,63 |
| 13000 IPI00303476 | 75,5 | 75,5 IMNVIGEPIDER                         | 12 | 693,36  | 1384,70 |
| 16026 IPI00303476 | 95,8 | 95,8 FTQAGSEVSALLGR                       | 14 | 718,38  | 1434,75 |
| 21388 IPI00303476 | 93,3 | 93,3 VALTGLTVAEYFR                        | 13 | 720,40  | 1438,78 |
| 26185 IPI00303476 | 31   | 31 TVLIMELINNVAK                          | 13 | 729,42  | 1456,83 |
| 22593 IPI00303476 | 56,2 | 56,2 TVLI(M)ELINNVAK                      | 13 | 737,42  | 1472,83 |
| 14774 IPI00303476 | 62,6 | 62,6 LVLEVAQHLGESTVR                      | 15 | 550,98  | 1649,91 |
| 21793 IPI00303476 | 70,8 | 70,8 AIAELGIYPAVDPLDSTR                   | 19 | 994,52  | 1987,03 |

|       |             |      |      |                                  |    |         |         |
|-------|-------------|------|------|----------------------------------|----|---------|---------|
| 29153 | IPI00303476 | 47,3 | 47,3 | SLQDIHAILG(M)DELSEEDKLTVSR       | 24 | 897,80  | 2690,37 |
| 26635 | IPI00303476 | 45   | 45   | GFQQILAGEYDHLPEQAFY(M)VGPIEEAVAK | 30 | 1122,88 | 3365,62 |
| 24843 | IPI00018146 | 58,1 | 58,1 | SICTTVLELLDK                     | 12 | 696,38  | 1390,74 |
| 9924  | IPI00000874 | 70,9 | 70,9 | TIAQDYGVLK                       | 10 | 554,31  | 1106,60 |
| 4981  | IPI00000874 | 60,2 | 60,2 | ATAV(M)PDGQFK                    | 11 | 590,79  | 1179,56 |
| 12133 | IPI00000874 | 82,8 | 82,8 | LVQAFQFTDK                       | 10 | 598,82  | 1195,62 |
| 11427 | IPI00000874 | 65   | 65   | QITVNDLPVGR                      | 11 | 606,34  | 1210,67 |
| 7720  | IPI00000874 | 82,3 | 82,3 | HGEVCPAGWKPGSDTIKPDVQK           | 22 | 802,73  | 2405,18 |
| 18000 | IPI00000874 | 50,5 | 50,5 | LNCQVIGASVDSHFCHLAWVNTPK         | 24 | 689,09  | 2752,32 |
| 33101 | IPI00216318 | 30,5 | 30,5 | EKIEAELQDICNDVLELLDK             | 20 | 796,40  | 2386,19 |
| 15304 | IPI00329801 | 59,6 | 59,6 | FITIFGTR                         | 8  | 477,77  | 953,53  |
| 9676  | IPI00329801 | 61,5 | 61,5 | VLTEHISR                         | 9  | 501,30  | 1000,59 |
| 8994  | IPI00329801 | 37,4 | 37,4 | LYDAYELK                         | 8  | 507,76  | 1013,51 |
| 18077 | IPI00329801 | 67,8 | 67,8 | SEIDLFNIR                        | 9  | 553,80  | 1105,58 |
| 13995 | IPI00329801 | 43,1 | 43,1 | GTVTDFPGFDER                     | 12 | 670,81  | 1339,60 |
| 26340 | IPI00329801 | 96,1 | 96,1 | GLGTDEESILTLLTSR                 | 16 | 852,95  | 1703,89 |
| 11017 | IPI00440493 | 44   | 44   | AVDSLVPGR                        | 10 | 513,80  | 1025,59 |
| 11237 | IPI00440493 | 82,3 | 82,3 | HALIYDDLK                        | 11 | 644,35  | 1286,69 |
| 12293 | IPI00440493 | 92,3 | 92,3 | TGTAEMSSILEER                    | 13 | 712,34  | 1422,67 |
| 6880  | IPI00440493 | 88,1 | 88,1 | TGTAE(M)SSILEER                  | 13 | 720,34  | 1438,66 |
| 20847 | IPI00440493 | 69,1 | 69,1 | G(M)SLNLEPDNVGVVVFNDK            | 20 | 1060,52 | 2119,02 |
| 20160 | IPI00440493 | 79,7 | 79,7 | FENAFLSHVVSQHQALLGTIR            | 21 | 592,57  | 2366,25 |
| 19917 | IPI00291006 | 84,8 | 84,8 | IFGVTTLDIVR                      | 11 | 617,36  | 1232,71 |
| 13233 | IPI00291006 | 73,9 | 73,9 | GCDVVVIPAGVPR                    | 13 | 669,86  | 1337,71 |
| 19372 | IPI00291006 | 67,5 | 67,5 | VDFPQDQLTALTGR                   | 14 | 780,90  | 1559,79 |
| 24980 | IPI00291006 | 93,5 | 93,5 | VAVLGASGGIGQPLSLLK               | 19 | 897,05  | 1792,08 |
| 19942 | IPI00291006 | 57,9 | 57,9 | SQETECTYFSTPLLLGK                | 17 | 987,48  | 1972,94 |
| 21383 | IPI00291006 | 94,9 | 94,9 | LTLYDIAHTPGVAADLSHIETK           | 22 | 789,09  | 2364,23 |
| 4345  | IPI00000816 | 50   | 50   | YDEMVES(M)K                      | 9  | 574,24  | 1146,46 |
| 6742  | IPI00000816 | 37   | 37   | EAAENSLVAYK                      | 11 | 597,80  | 1193,59 |
| 9146  | IPI00000816 | 40,4 | 40,4 | YLAEFATGNDR                      | 11 | 628,80  | 1255,58 |
| 6957  | IPI00179330 | 31,3 | 31,3 | MQIFVK                           | 6  | 383,22  | 764,43  |

|       |             |      |      |                       |    |        |         |
|-------|-------------|------|------|-----------------------|----|--------|---------|
| 8088  | IPI00179330 | 75,5 | 75,5 | ESTLHLVLR             | 9  | 534,31 | 1066,61 |
| 6112  | IPI00179330 | 37,9 | 37,9 | TLSDYNIQK             | 9  | 541,28 | 1080,54 |
| 21353 | IPI00169383 | 55,8 | 55,8 | VLPGVDAALSNI          | 11 | 549,31 | 1096,61 |
| 19265 | IPI00169383 | 31,2 | 31,2 | ITLPVDFVTADK          | 12 | 659,87 | 1317,72 |
| 12190 | IPI00169383 | 90,5 | 90,5 | LGDVYVNDAFGTAHR       | 15 | 817,90 | 1633,78 |
| 12040 | IPI00169383 | 59,5 | 59,5 | LGDVYV(N)DAFGTAHR     | 15 | 545,93 | 1634,77 |
| 10434 | IPI00169383 | 29,2 | 29,2 | VSHVSTGGGASLELLEK     | 18 | 580,98 | 1739,91 |
| 9654  | IPI00169383 | 50,6 | 50,6 | GCITHGGGDTATCCA       | 17 | 877,90 | 1753,78 |
| 20042 | IPI00169383 | 97,1 | 97,1 | ACANPAAGSVILLENLR     | 17 | 884,97 | 1767,93 |
| 19905 | IPI00169383 | 66,4 | 66,4 | ALESPERPFLAILGGAK     | 17 | 590,34 | 1767,99 |
| 16586 | IPI00169383 | 52,5 | 52,5 | VLNN(M)EIGTSLFDEEGAK  | 18 | 991,97 | 1981,93 |
| 16491 | IPI00746388 | 63,2 | 63,2 | LFFLQVK               | 7  | 447,78 | 893,54  |
| 18745 | IPI00746388 | 75   | 75   | IGFPWSEIR             | 9  | 552,80 | 1103,58 |
| 15906 | IPI00746388 | 77,8 | 77,8 | APDFVIFYAPR           | 10 | 591,80 | 1181,59 |
| 31858 | IPI00746388 | 87,4 | 87,4 | FYPEDVAEELIQDITQK     | 17 | 680,00 | 2036,99 |
| 13115 | IPI00550363 | 43,5 | 43,5 | ENFQNLK               | 8  | 539,77 | 1077,52 |
| 5856  | IPI00550363 | 95,7 | 95,7 | NVIGLQ(M)GTNR         | 11 | 609,82 | 1217,62 |
| 11420 | IPI00550363 | 65,8 | 65,8 | TL(M)NLGGLAVAR        | 12 | 616,34 | 1230,68 |
| 30628 | IPI00550363 | 62,4 | 62,4 | DGTVLCELINALYPEGQAPVK | 21 | 763,06 | 2286,15 |
| 5698  | IPI00220642 | 53,2 | 53,2 | YLAEVATGEK            | 10 | 540,78 | 1079,55 |
| 34014 | IPI00220642 | 67,8 | 67,8 | ELEAVCQDVLSLLDNYLIK   | 19 | 745,72 | 2234,15 |
| 16004 | IPI00219217 | 53,1 | 53,1 | FIIPQIVK              | 8  | 479,31 | 956,61  |
| 12525 | IPI00219217 | 83,8 | 83,8 | SADTLWDIQK            | 10 | 588,80 | 1175,58 |
| 5271  | IPI00219217 | 67,6 | 67,6 | VIGSGCNLDSAR          | 12 | 624,80 | 1247,59 |
| 12843 | IPI00219217 | 30   | 30   | MVVESAYEVIK           | 11 | 634,33 | 1266,65 |
| 10304 | IPI00219217 | 32,3 | 32,3 | (M)VVESAYEVIK         | 11 | 642,33 | 1282,65 |
| 10705 | IPI00219217 | 92,7 | 92,7 | LIAPVAEEEEATVPNNK     | 16 | 847,95 | 1693,89 |
| 12073 | IPI00219217 | 94,9 | 94,9 | GE(M)(M)DLQHGSFLQTPK  | 17 | 655,31 | 1962,92 |
| 5816  | IPI00554788 | 51,7 | 51,7 | LAADDFR               | 7  | 404,20 | 806,39  |
| 8526  | IPI00554788 | 60,2 | 60,2 | IVLQIDNAR             | 9  | 521,31 | 1040,60 |
| 7772  | IPI00554788 | 37   | 37   | LEAEIATYR             | 9  | 533,28 | 1064,55 |
| 5046  | IPI00554788 | 57,9 | 57,9 | VKYETELA(M)R          | 10 | 628,32 | 1254,63 |

|       |             |      |      |                                  |    |         |         |
|-------|-------------|------|------|----------------------------------|----|---------|---------|
| 25423 | IPI00554788 | 29,7 | 29,7 | LQLETEIEALKEELLF(M)KK            | 19 | 581,07  | 2320,26 |
| 29063 | IPI00554788 | 58,6 | 58,6 | YALQ(M)EQL(N)GILLHLESELAQTR      | 23 | 896,46  | 2686,37 |
| 4918  | IPI00291175 | 35,2 | 35,2 | IAELCDDPK                        | 9  | 530,75  | 1059,49 |
| 17297 | IPI00291175 | 33,6 | 33,6 | ELLPVLISA(M)K                    | 11 | 615,36  | 1228,71 |
| 9204  | IPI00291175 | 83,3 | 83,3 | ETVQTTEDQILK                     | 12 | 702,86  | 1403,71 |
| 11095 | IPI00291175 | 79,3 | 79,3 | AQQVSQGLDVLTA                    | 14 | 729,40  | 1456,79 |
| 9816  | IPI00291175 | 39,3 | 39,3 | LLAVAATAPPDAPNR                  | 15 | 738,91  | 1475,81 |
| 19160 | IPI00291175 | 78,7 | 78,7 | VDQLTAQLADLAAR                   | 14 | 495,61  | 1483,80 |
| 20275 | IPI00291175 | 52,1 | 52,1 | VLQLTSWDEDAWASK                  | 15 | 874,93  | 1747,84 |
| 31333 | IPI00291175 | 79,4 | 79,4 | AIPDLTAPVAAVQAAVSNLVR            | 21 | 692,73  | 2075,17 |
| 30208 | IPI00013890 | 68,6 | 68,6 | VETELQGVCDTVLGLLDShLIK           | 22 | 813,76  | 2438,27 |
| 27045 | IPI00179964 | 45,1 | 45,1 | LPIDVTEGEVISLGLPFGK              | 19 | 662,04  | 1983,09 |
| 25318 | IPI00179964 | 34   | 34   | KLPIDVTEGEVISLGLPFGK             | 20 | 704,74  | 2111,19 |
| 19897 | IPI00179964 | 84,3 | 84,3 | NNQFQALLQYADPVSAQHAK             | 20 | 748,38  | 2242,11 |
| 25045 | IPI00179964 | 65,5 | 65,5 | IAIPGLAGAGNSVLLVSNLNPER          | 23 | 1138,14 | 2274,27 |
| 25875 | IPI00179964 | 98,3 | 98,3 | IAIPGLAGAG(N)SVLLVSNLNPER        | 23 | 1138,63 | 2275,25 |
| 33994 | IPI00179964 | 60,4 | 60,4 | IIVENLFYPVTLVDVLHQIFSK           | 21 | 830,13  | 2487,37 |
| 12865 | IPI00012503 | 31,3 | 31,3 | EILDAFDK                         | 8  | 475,75  | 949,48  |
| 11182 | IPI00012503 | 34,8 | 34,8 | QEILAALEK                        | 9  | 507,79  | 1013,58 |
| 5353  | IPI00012503 | 38,1 | 38,1 | DGGFCEVCK                        | 9  | 536,22  | 1070,42 |
| 5458  | IPI00012503 | 49,6 | 49,6 | LGPG(M)ADICK                     | 10 | 539,26  | 1076,50 |
| 30695 | IPI00012503 | 96,9 | 96,9 | EIVDSYLPVILDIIK                  | 15 | 865,50  | 1728,99 |
| 13760 | IPI00023748 | 89,5 | 89,5 | SPASDTYIVFGEAK                   | 14 | 742,87  | 1483,72 |
| 16782 | IPI00023748 | 96   | 96   | NILFVITKPDVYK                    | 13 | 775,45  | 1548,89 |
| 14143 | IPI00025512 | 49,6 | 49,6 | GPSWDPFR                         | 8  | 481,23  | 960,45  |
| 17935 | IPI00025512 | 98,4 | 98,4 | LFDQAFGLPR                       | 10 | 582,31  | 1162,61 |
| 17164 | IPI00025512 | 58,8 | 58,8 | VSLDVNHAFDELTVK                  | 16 | 892,46  | 1782,91 |
| 17772 | IPI00025512 | 66,7 | 66,7 | LATQSNEITIPVTFESR                | 17 | 953,50  | 1904,98 |
| 18937 | IPI00025512 | 70,9 | 70,9 | LATQS(N)EITIPVTFESR              | 17 | 953,99  | 1905,97 |
| 22753 | IPI00025512 | 34,6 | 34,6 | YTLPPGVDPTQVSSSLSPGTLTVEAP(M)PK  | 30 | 1038,86 | 3113,55 |
| 20212 | IPI00025512 | 47,7 | 47,7 | KYTLPPGVDPTQVSSSLSPGTLTVEAP(M)PK | 31 | 1081,56 | 3241,64 |
| 12408 | IPI00216308 | 30,7 | 30,7 | GYGFGLIK                         | 8  | 427,74  | 853,47  |

|                   |      |                                       |    |         |         |
|-------------------|------|---------------------------------------|----|---------|---------|
| 6935 IPI00216308  | 59,2 | 59,2 VTQSNFAVGYK                      | 11 | 607,31  | 1212,61 |
| 16356 IPI00216308 | 52,8 | 52,8 WTEYGLTFTEK                      | 11 | 687,83  | 1373,65 |
| 12363 IPI00216308 | 79,8 | 79,8 LTFDSSFSPNTGK                    | 13 | 700,84  | 1399,66 |
| 17054 IPI00216308 | 71,3 | 71,3 VN(N)SSLIGLGYTQTLKPGIK           | 20 | 702,06  | 2103,16 |
| 17674 IPI00299571 | 71,8 | 71,8 NSYLEVLLK                        | 9  | 539,81  | 1077,61 |
| 5151 IPI00299571  | 47,5 | 47,5 GESPVVDYDGGR                     | 11 | 576,25  | 1150,49 |
| 24218 IPI00299571 | 88,6 | 88,6 TGEAIVDAALSALR                   | 14 | 693,88  | 1385,75 |
| 18022 IPI00299571 | 84,6 | 84,6 LAAVDATVNQVLASR                  | 15 | 764,43  | 1526,84 |
| 13353 IPI00299571 | 90,9 | 90,9 GSTAPVGGGAFPTIVER                | 17 | 808,43  | 1614,84 |
| 13973 IPI00397191 | 98,3 | 98,3 AGPNT(N)GSQFFICTAK               | 16 | 857,40  | 1712,78 |
| 9031 IPI00012011  | 68,3 | 68,3 AVLFCLSEDKK                      | 11 | 655,34  | 1308,67 |
| 10520 IPI00012011 | 50,9 | 50,9 YALYDATYETK                      | 11 | 669,32  | 1336,62 |
| 15054 IPI00012011 | 65,6 | 65,6 LGGSAVISLEGKPL                   | 14 | 670,89  | 1339,77 |
| 24823 IPI00012011 | 68,8 | 68,8 KEDLVFIFWAPESAPLK                | 17 | 664,03  | 1989,06 |
| 6534 IPI00007765  | 36,5 | 36,5 LFE(M)AYK                        | 7  | 459,23  | 916,44  |
| 14389 IPI00007765 | 81   | 81 DAGQISGLNVLR                       | 12 | 621,84  | 1241,67 |
| 4856 IPI00007765  | 88,7 | 88,7 ETAENYLGHTAK                     | 12 | 667,32  | 1332,63 |
| 21053 IPI00007765 | 62,7 | 62,7 AQFEGIVTDLIR                     | 12 | 681,37  | 1360,73 |
| 15326 IPI00007765 | 48,3 | 48,3 SDIGEVILVGG(M)TR                 | 14 | 731,88  | 1461,75 |
| 23173 IPI00007765 | 37,4 | 37,4 LLGQFTLIGIPPAPR                  | 15 | 796,98  | 1591,94 |
| 16409 IPI00007765 | 47,3 | 47,3 NAVITVPAYFNDSQR                  | 15 | 847,93  | 1693,84 |
| 32641 IPI00219038 | 97,6 | 97,6 FQSAAIGALQEASEAYLVGLFEDTNLCAIHAK | 32 | 860,18  | 3436,70 |
| 32593 IPI00219038 | 51   | 51 F(Q)SAAIGALQEASEAYLVGLFEDTNLCAIHAK | 32 | 1146,90 | 3437,67 |
| 10024 IPI00604590 | 41,7 | 41,7 GLVGEIHK                         | 8  | 414,76  | 827,51  |
| 9839 IPI00604590  | 56,5 | 56,5 GDFCIQVGR                        | 9  | 526,25  | 1050,49 |
| 13645 IPI00604590 | 35,6 | 35,6 DRPFFAGLVK                       | 10 | 383,89  | 1148,63 |
| 12785 IPI00604590 | 49,9 | 49,9 DRPFFPGLVK                       | 10 | 588,33  | 1174,65 |
| 8419 IPI00604590  | 43,9 | 43,9 TFIAIKPDGVQR                     | 12 | 672,88  | 1343,76 |
| 6995 IPI00604590  | 90,2 | 90,2 V(M)LGETNPADSKPGTIR              | 17 | 601,31  | 1800,90 |
| 5691 IPI00001639  | 36,7 | 36,7 TTLVI(M)ER                       | 8  | 489,77  | 977,52  |
| 21135 IPI00001639 | 48,2 | 48,2 LAATNALLNSLEFTK                  | 15 | 803,45  | 1604,88 |
| 28003 IPI00001639 | 92,4 | 92,4 GALQYLVPILTQTLTK                 | 16 | 587,02  | 1758,03 |

|       |             |      |      |                                     |    |         |         |
|-------|-------------|------|------|-------------------------------------|----|---------|---------|
| 24375 | IPI00001639 | 57,1 | 57,1 | YLEVVLNTLQQASQAQVDK                 | 19 | 1074,07 | 2146,13 |
| 38244 | IPI00001639 | 57,1 | 57,1 | (M)FQSTAGSGGVQEDAL(M)AVSTLVEVLGGFLK | 32 | 1101,87 | 3302,60 |
| 10419 | IPI00216592 | 63,7 | 63,7 | SDVEAIFSK                           | 9  | 498,26  | 994,50  |
| 7320  | IPI00216592 | 59,9 | 59,9 | KSDVEAIFSK                          | 10 | 562,30  | 1122,59 |
| 16314 | IPI00216592 | 89,6 | 89,6 | GFAFVQYVNER                         | 11 | 665,33  | 1328,65 |
| 17374 | IPI00216592 | 99,3 | 99,3 | (M)IAGQVLDINLAAEPK                  | 16 | 849,96  | 1697,90 |
| 15984 | IPI00010896 | 43,1 | 43,1 | GFTIPEAFR                           | 9  | 519,27  | 1036,53 |
| 10590 | IPI00010896 | 94,6 | 94,6 | GVTFNVTTVDTK                        | 12 | 641,34  | 1280,66 |
| 5391  | IPI00010896 | 80,7 | 80,7 | NSNPALNDNLEK                        | 12 | 664,83  | 1327,64 |
| 23993 | IPI00010896 | 37,5 | 37,5 | IEEFLEAVLCPPR                       | 13 | 524,94  | 1571,80 |
| 20142 | IPI00010896 | 90   | 90   | LAALNPESNTAGLDIFAK                  | 18 | 922,99  | 1843,97 |
| 23243 | IPI00010896 | 74   | 74   | FLDGNELTLADCNLLPK                   | 17 | 966,99  | 1931,97 |
| 4933  | IPI00020984 | 46,9 | 46,9 | WEVEE(M)K                           | 7  | 483,72  | 965,42  |
| 11312 | IPI00020984 | 55,9 | 55,9 | TPELNLDQFHDK                        | 12 | 486,24  | 1455,70 |
| 25853 | IPI00020984 | 84,8 | 84,8 | IPNPDDFFEDLEPFR                     | 14 | 868,42  | 1734,83 |
| 13568 | IPI00020984 | 71,8 | 71,8 | IPDPEAVKPDDWDEDAPAK                 | 19 | 703,33  | 2106,97 |
| 17717 | IPI00007188 | 65,4 | 65,4 | EQGVLSFWR                           | 9  | 561,29  | 1120,57 |
| 18090 | IPI00007188 | 94,2 | 94,2 | DFLAGGVAAAISK                       | 13 | 610,34  | 1218,66 |
| 21498 | IPI00007188 | 91,8 | 91,8 | YFPTQALNFAFK                        | 12 | 723,87  | 1445,73 |
| 15829 | IPI00007188 | 71   | 71   | GTDI(M)YTGTLDCWR                    | 14 | 852,87  | 1703,73 |
| 11765 | IPI00219219 | 58,6 | 58,6 | SFVLNLGK                            | 8  | 439,26  | 876,51  |
| 9026  | IPI00219219 | 49,3 | 49,3 | LPDGYEFK                            | 8  | 484,74  | 967,46  |
| 4273  | IPI00219219 | 58,8 | 58,8 | DGGAWGTEQR                          | 10 | 538,74  | 1075,47 |
| 11452 | IPI00219219 | 77   | 77   | DS(N)NLCLHFNPR                      | 12 | 744,34  | 1486,66 |
| 18347 | IPI00219219 | 31,5 | 31,5 | LNLEAINY(M)AADGDFK                  | 16 | 900,93  | 1799,84 |
| 5961  | IPI00013881 | 54,2 | 54,2 | VHIEIGPDGR                          | 10 | 546,79  | 1091,57 |
| 11780 | IPI00013881 | 79,6 | 79,6 | GLPWSCSADEVQR                       | 13 | 752,85  | 1503,68 |
| 5246  | IPI00013881 | 92,3 | 92,3 | HTGPNSPDTANDGFVR                    | 16 | 562,26  | 1683,76 |
| 25418 | IPI00013881 | 84,2 | 84,2 | ATENDIYNFFSPLNPVR                   | 17 | 998,99  | 1995,97 |
| 25555 | IPI00013881 | 85,9 | 85,9 | ATE(N)DIYNFFSPLNPVR                 | 17 | 999,48  | 1996,95 |
| 7725  | IPI00027230 | 32   | 32   | SGYLLPDTK                           | 9  | 497,27  | 992,52  |
| 11235 | IPI00027230 | 48,6 | 48,6 | GLFDEYGSK                           | 9  | 508,24  | 1014,47 |

|                   |      |                                            |    |         |         |
|-------------------|------|--------------------------------------------|----|---------|---------|
| 9476 IPI00027230  | 52,4 | 52,4 FAFQAEVNR                             | 9  | 541,27  | 1080,54 |
| 11295 IPI00027230 | 48,7 | 48,7 LSLNIDPDAK                            | 10 | 543,30  | 1084,58 |
| 16429 IPI00027230 | 91,3 | 91,3 EEEAIQLDGLNASQIR                      | 16 | 893,45  | 1784,89 |
| 12545 IPI00027230 | 88   | 88 FQSSHPTDITSLDQYVER                      | 19 | 754,03  | 2259,05 |
| 24670 IPI00027230 | 35,2 | 35,2 KGYEVIYLTEPVDEYCIQALPEFDGK            | 26 | 1026,17 | 3075,48 |
| 7980 IPI00465439  | 53   | 53 QLLLTADDR                               | 9  | 522,79  | 1043,56 |
| 8599 IPI00465439  | 52,3 | 52,3 GILAADESTGSIK                         | 14 | 666,85  | 1331,69 |
| 9244 IPI00465439  | 59,5 | 59,5 PYQYPALTPEQK                          | 12 | 717,87  | 1433,72 |
| 22648 IPI00465439 | 49,7 | 49,7 YASICQQ(N)GIVPIVEPEILPDGDHDLK         | 27 | 1007,83 | 3020,48 |
| 13023 IPI00465430 | 67,7 | 67,7 LGSLVDEFK                             | 9  | 504,27  | 1006,53 |
| 8561 IPI00465430  | 72,5 | 72,5 KQELLEALTK                            | 10 | 586,85  | 1171,68 |
| 17302 IPI00465430 | 94,5 | 94,5 NIYVLQELDNPGAK                        | 14 | 787,41  | 1572,81 |
| 12298 IPI00465430 | 84   | 84 SDSFENPVLQQHFR                          | 14 | 852,41  | 1702,81 |
| 28928 IPI00465430 | 48,6 | 48,6 IQVTPPGFQLVFLPFADDK                   | 19 | 1066,58 | 2131,14 |
| 30095 IPI00465430 | 35,2 | 35,2 NLEALALDLMEPEQAVDLTLPK                | 22 | 808,43  | 2422,27 |
| 19852 IPI00028888 | 61,2 | 61,2 GFGFVLFK                              | 8  | 457,76  | 913,51  |
| 17872 IPI00028888 | 45,6 | 45,6 GFCFITFK                              | 8  | 510,25  | 1018,49 |
| 12273 IPI00028888 | 77,2 | 77,2 IFVGGGLSPDTPEEK                       | 14 | 744,88  | 1487,75 |
| 22690 IPI00028888 | 53,9 | 53,9 EYFGGFGEVESIELP(M)DNK                 | 19 | 1088,99 | 2175,97 |
| 12468 IPI00011253 | 42,1 | 42,1 FVADGIFK                              | 8  | 448,75  | 895,48  |
| 18410 IPI00011253 | 93,9 | 93,9 FGFPEGSVELYAEK                        | 14 | 786,88  | 1571,75 |
| 6469 IPI00011253  | 53,5 | 53,5 GGKPEPPA(M)PQPVPPTA                   | 16 | 795,40  | 1588,79 |
| 19830 IPI00011253 | 62,4 | 62,4 FVDGL(M)IHSGDPVNYYVDTAVR              | 22 | 828,73  | 2483,18 |
| 11227 IPI00028091 | 33,9 | 33,9 YSYVCPDLVK                            | 10 | 622,30  | 1242,59 |
| 9821 IPI00028091  | 41,1 | 41,1 NIVLSSGGST(M)FR                       | 12 | 649,33  | 1296,65 |
| 31118 IPI00028091 | 83,9 | 83,9 DITYFIQQLLR                           | 11 | 705,39  | 1408,77 |
| 22815 IPI00028091 | 64,4 | 64,4 GVDDLDFFIGDEAIEKPTYATK                | 22 | 815,40  | 2443,18 |
| 24225 IPI00028091 | 34   | 34 TLTGTVIDSGDGVTHVIPVAEGYVIGSCK           | 30 | 1020,20 | 3057,57 |
| 35354 IPI00028091 | 65,5 | 65,5 FLGPEIFFHPEFANPDFTQPISEVVDEVIQNCPIDVR | 37 | 1079,78 | 4315,08 |
| 21038 IPI00014230 | 58,3 | 58,3 AFVDFLSDEIKEER                        | 14 | 566,62  | 1696,83 |
| 22205 IPI00014230 | 51,4 | 51,4 VEEQPELTSTPNFVVEVIK                   | 20 | 1144,09 | 2286,16 |
| 23100 IPI00014230 | 84,7 | 84,7 ALVLDCHYPEDEVGQEDEAESDIFSIR           | 27 | 1046,14 | 3135,39 |

|       |             |      |      |                                            |    |         |         |
|-------|-------------|------|------|--------------------------------------------|----|---------|---------|
| 35694 | IPI00014230 | 68,4 | 68,4 | GVDNTFADELVELSTALEHQEYITFLEDLK             | 30 | 1147,23 | 3438,67 |
| 12893 | IPI00217975 | 91,5 | 91,5 | IESLSSQLSNLQK                              | 13 | 723,89  | 1445,77 |
| 32901 | IPI00217975 | 90,9 | 90,9 | SLEGDLEDLKDQIAQLEASLAAAK                   | 24 | 843,44  | 2527,30 |
| 25233 | IPI00217975 | 70,2 | 70,2 | TTIPEEEEEEEAAGVVVEELFHQQGTPR               | 30 | 1137,86 | 3410,56 |
| 14819 | IPI00219365 | 32,9 | 32,9 | EDAVLEYLK                                  | 9  | 540,28  | 1078,55 |
| 4228  | IPI00219365 | 82,8 | 82,8 | AQ(M)VQEDLEK                               | 10 | 603,79  | 1205,56 |
| 24740 | IPI00646240 | 42,8 | 42,8 | GIMNSFVNDIFER                              | 13 | 771,38  | 1540,74 |
| 20110 | IPI00646240 | 60,5 | 60,5 | GI(M)NSFVNDIFER                            | 13 | 779,37  | 1556,73 |
| 21313 | IPI00646240 | 56,9 | 56,9 | GI(M)(N)SFVNDIFER                          | 13 | 779,86  | 1557,71 |
| 20340 | IPI00646240 | 64,6 | 64,6 | (M)GI(M)NSFVNDIFER                         | 14 | 852,89  | 1703,77 |
| 21728 | IPI00646240 | 82,1 | 82,1 | (M)GI(M)(N)SFVNDIFER                       | 14 | 853,38  | 1704,75 |
| 7205  | IPI00218187 | 44,1 | 44,1 | HDLDLICR                                   | 8  | 521,26  | 1040,51 |
| 19317 | IPI00218187 | 72   | 72   | YPENFFLLR                                  | 9  | 599,82  | 1197,62 |
| 28413 | IPI00218187 | 99,5 | 99,5 | EIFLSQPILLELEAPLK                          | 17 | 977,07  | 1952,12 |
| 17922 | IPI00178440 | 45,1 | 45,1 | SSILLDVKPWDDTD(M)AK                        | 18 | 693,67  | 2077,99 |
| 25488 | IPI00178440 | 40,9 | 40,9 | SYIEGYVPSQADVAVFEAVSSPPPADLCHALR           | 32 | 1149,23 | 3444,67 |
| 5306  | IPI00178352 | 40,5 | 40,5 | TPCEEVYVK                                  | 9  | 562,77  | 1123,52 |
| 10031 | IPI00178352 | 50,6 | 50,6 | AWGPGLETGQVGK                              | 13 | 650,34  | 1298,66 |
| 11120 | IPI00178352 | 92,5 | 92,5 | GAGTGGLGLTVEGPCEAK                         | 18 | 837,41  | 1672,81 |
| 19417 | IPI00178352 | 42,7 | 42,7 | AFGPGLEPTGCIVDKPAEFTIDAR                   | 24 | 854,43  | 2560,26 |
| 11395 | IPI00171903 | 59,6 | 59,6 | INEILSNALK                                 | 10 | 557,83  | 1113,64 |
| 6444  | IPI00171903 | 60,3 | 60,3 | (M)GAG(M)GFGLER                            | 11 | 579,26  | 1156,50 |
| 19195 | IPI00171903 | 50,5 | 50,5 | AFITNIPFDVK                                | 11 | 632,85  | 1263,69 |
| 5871  | IPI00171903 | 81,2 | 81,2 | (M)GLA(M)GGGGGASFDR                        | 15 | 708,31  | 1414,60 |
| 7712  | IPI00171903 | 94   | 94   | (M)GPA(M)GPALGAGIER                        | 15 | 730,35  | 1458,69 |
| 22323 | IPI00171903 | 79,5 | 79,5 | VGEVTYVELL(M)DAEGK                         | 16 | 884,94  | 1767,86 |
| 4340  | IPI00010720 | 70,2 | 70,2 | IADGYEQAAR                                 | 10 | 547,27  | 1092,52 |
| 13855 | IPI00010720 | 37,7 | 37,7 | IAILTCPFEPKPK                              | 14 | 537,64  | 1609,89 |
| 25175 | IPI00010720 | 71,2 | 71,2 | LGFAGLVQEISFGTTK                           | 16 | 834,45  | 1666,89 |
| 26755 | IPI00010720 | 84,9 | 84,9 | WVGGPEIELIAIATGGR                          | 17 | 869,98  | 1737,94 |
| 24483 | IPI00008527 | 79,8 | 79,8 | AAGVNVEPFWPGLFAK                           | 16 | 851,95  | 1701,89 |
| 22548 | IPI00008527 | 56,3 | 56,3 | ALANVNIGSLICNVGAGGPAPAAGAAPAGGPAPSTAAAPAEK | 43 | 952,99  | 3807,92 |



|                   |      |                                     |    |         |         |
|-------------------|------|-------------------------------------|----|---------|---------|
| 9629 IPI00011274  | 76   | 76 FGEVVDCTIK                       | 10 | 584,29  | 1166,56 |
| 18242 IPI00011274 | 66,6 | 66,6 GFCFITYTDEEPPVK                | 14 | 853,39  | 1704,77 |
| 14118 IPI00306825 | 85,6 | 85,6 LGLSTLGELK                     | 10 | 515,81  | 1029,61 |
| 9421 IPI00306825  | 60,4 | 60,4 VEEIVTLR                       | 9  | 544,30  | 1086,59 |
| 14984 IPI00306825 | 76,9 | 76,9 GLLSDS(M)TDVPVDTGVAAR          | 19 | 960,47  | 1918,93 |
| 8874 IPI00178083  | 72,3 | 72,3 (M)ELQEIQLK                    | 9  | 574,30  | 1146,59 |
| 12303 IPI00178083 | 64   | 64 IQLVEEELDR                       | 10 | 622,33  | 1242,64 |
| 7030 IPI00178083  | 76,4 | 76,4 EQAEAEVASLNR                   | 12 | 658,83  | 1315,64 |
| 14268 IPI00217468 | 89,4 | 89,4 (N)GLSLAALK                    | 9  | 444,26  | 886,51  |
| 6114 IPI00217468  | 40,4 | 40,4 ALAAGGYDVEK                    | 11 | 547,28  | 1092,54 |
| 7342 IPI00479217  | 34,6 | 34,6 FIEIAAR                        | 7  | 410,24  | 818,46  |
| 11400 IPI00479217 | 38,3 | 38,3 YNILGTNTI(M)DK                 | 12 | 699,85  | 1397,69 |
| 17847 IPI00479217 | 48,9 | 48,9 SSGPSTLFAVTVAPPGAR             | 18 | 857,96  | 1713,90 |
| 24428 IPI00479217 | 44,5 | 44,5 EKPYFPIPEEYTFIQNVPLEDR         | 22 | 908,79  | 2723,35 |
| 17719 IPI00023048 | 68,1 | 68,1 GVVQELQQAISK                   | 12 | 650,37  | 1298,72 |
| 9616 IPI00023048  | 80,8 | 80,8 IASLEVENQSLR                   | 12 | 679,87  | 1357,72 |
| 19310 IPI00023048 | 95   | 95 SIQLDGLVWGASK                    | 13 | 687,37  | 1372,73 |
| 13165 IPI00023048 | 47   | 47 FEEHVQSVDIAAFNK                  | 15 | 578,62  | 1732,84 |
| 7192 IPI00023048  | 29   | 29 SLAGSSGPGASSGTSGDHGELVVR         | 24 | 729,02  | 2184,04 |
| 23670 IPI00023048 | 45,4 | 45,4 LQIQCVVEDDKVGTDLLEEEITK        | 23 | 892,12  | 2673,34 |
| 17222 IPI00026781 | 66,4 | 66,4 VLEALLPLK                      | 9  | 498,33  | 994,64  |
| 11542 IPI00026781 | 51,2 | 51,2 LQVVDQPLPVR                    | 11 | 632,37  | 1262,73 |
| 25865 IPI00026781 | 75,4 | 75,4 LPEDPLLSGLLDSPALK              | 17 | 889,50  | 1776,99 |
| 30680 IPI00026781 | 94,8 | 94,8 TLLEGSGLESIIHSSLAEPR           | 23 | 808,11  | 2421,31 |
| 17322 IPI00026781 | 46,6 | 46,6 SLYQSAGVAPESFEYIEAHGTGTK       | 24 | 848,07  | 2541,20 |
| 31223 IPI00026781 | 30,8 | 30,8 ALGLGVEQLPVVFEDVVLHQATILPK     | 26 | 929,20  | 2784,57 |
| 17517 IPI00220834 | 63,8 | 63,8 SQLDIIIHSLK                    | 11 | 422,92  | 1265,73 |
| 18732 IPI00220834 | 65,8 | 65,8 TDTLEDLFPTTK                   | 12 | 690,85  | 1379,68 |
| 25603 IPI00220834 | 81,3 | 81,3 HL(M)LPDFDLLEDIESK             | 16 | 644,32  | 1929,94 |
| 32721 IPI00220834 | 70,7 | 70,7 ASFEEASNQLINHIEQFLDTNETPYF(M)K | 28 | 1111,51 | 3331,52 |
| 7542 IPI00217966  | 41   | 41 LVIITAGAR                        | 9  | 457,30  | 912,58  |
| 10860 IPI00217966 | 45   | 45 SADTLWGIQK                       | 10 | 559,80  | 1117,58 |

|                   |      |                                      |    |         |         |
|-------------------|------|--------------------------------------|----|---------|---------|
| 19450 IPI00217966 | 78,9 | 78,9 DQLIYNLLK                       | 9  | 560,32  | 1118,63 |
| 4753 IPI00217966  | 93   | 93 VTLTSEEEAR                        | 10 | 567,79  | 1133,56 |
| 30010 IPI00217966 | 80,5 | 80,5 LLIVSNPVDILTIVAWK               | 17 | 648,71  | 1943,11 |
| 10810 IPI00302850 | 73,4 | 73,4 NREPVQLETLSIR                   | 13 | 518,96  | 1553,85 |
| 32276 IPI00302850 | 79,6 | 79,6 YFILPDSLPLDTLLVDVEPK            | 20 | 763,09  | 2286,23 |
| 6107 IPI00000875  | 34,1 | 34,1 TPEFLR                          | 6  | 381,71  | 761,41  |
| 23648 IPI00000875 | 82,7 | 82,7 ILGLLDAYLK                      | 10 | 559,84  | 1117,67 |
| 9189 IPI00000875  | 79,3 | 79,3 LDPGSEETQTLVR                   | 13 | 722,87  | 1443,72 |
| 26418 IPI00000875 | 74,3 | 74,3 YSNEDTLSVALPYFWEHFDK            | 20 | 821,05  | 2460,13 |
| 16787 IPI00022744 | 99   | 99 NLFEDQNTLTSICEK                   | 15 | 906,43  | 1810,84 |
| 31853 IPI00022744 | 85,9 | 85,9 FLESVEGNQNYPLLLLTLLEK           | 21 | 811,78  | 2432,31 |
| 17472 IPI00024915 | 66,9 | 66,9 VNLAELFK                        | 8  | 467,27  | 932,53  |
| 8784 IPI00024915  | 60,9 | 60,9 FS(M)VVQDGIVK                   | 11 | 619,83  | 1237,64 |
| 13690 IPI00024915 | 40,3 | 40,3 THLPGFVEQAEALK                  | 14 | 513,94  | 1538,81 |
| 18512 IPI00024915 | 70   | 70 VGDAIPAVEVFEGEPGNK                | 18 | 914,46  | 1826,91 |
| 11520 IPI00219153 | 89,7 | 89,7 ITVTSEVPFSK                     | 11 | 604,33  | 1206,65 |
| 8694 IPI00219153  | 65,1 | 65,1 AGNLGGGVVTIER                   | 13 | 621,84  | 1241,67 |
| 27363 IPI00219153 | 76,2 | 76,2 FTLDCCTHPVEDGI(M)DAANFEQFLQER   | 26 | 1033,80 | 3098,37 |
| 27105 IPI00219153 | 35,9 | 35,9 FTLDCCTHPVEDGI(M)DAANFEQFL(Q)ER | 26 | 1034,13 | 3099,37 |
| 9724 IPI00008530  | 48,9 | 48,9 GNVGFVFTK                       | 9  | 484,76  | 967,51  |
| 15734 IPI00008530 | 65,7 | 65,7 IIQLLDDYPK                      | 10 | 609,34  | 1216,67 |
| 20983 IPI00008530 | 90,9 | 90,9 TSFFQALGITTK                    | 12 | 657,36  | 1312,70 |
| 21643 IPI00008530 | 50   | 50 GTIEILSDVQLIK                     | 13 | 714,92  | 1427,82 |
| 13063 IPI00008530 | 67,4 | 67,4 AGAIAPCEVTVPAQNTGLGPEK          | 22 | 1090,55 | 2179,09 |
| 21640 IPI00008530 | 32,2 | 32,2 NVASVCLQIGYPTVASVPHSII(N)GYK    | 26 | 930,15  | 2787,43 |
| 5798 IPI00646304  | 37,1 | 37,1 DVIIADCGK                       | 9  | 495,75  | 989,49  |
| 5243 IPI00646304  | 76,4 | 76,4 VLEG(M)EVVR                     | 9  | 524,28  | 1046,54 |
| 9191 IPI00646304  | 47,4 | 47,4 IEVEKPFAlAK                     | 11 | 622,87  | 1243,72 |
| 16476 IPI00646304 | 92,1 | 92,1 TVDNFVALATGEK                   | 13 | 682,86  | 1363,70 |
| 13143 IPI00002966 | 34   | 34 AFSDPFVEAEK                       | 11 | 620,30  | 1238,58 |
| 16704 IPI00002966 | 74,5 | 74,5 GCALQCAILSPAFAK                 | 14 | 768,39  | 1534,76 |
| 24435 IPI00002966 | 51,6 | 51,6 SNLAYDIVQLPTGLTGIK              | 18 | 952,03  | 1902,05 |

|       |             |      |      |                           |    |         |         |
|-------|-------------|------|------|---------------------------|----|---------|---------|
| 4998  | IPI00002966 | 64,1 | 64,1 | NKEDQYDHLDAAD(M)TK        | 16 | 637,28  | 1908,82 |
| 17324 | IPI00002966 | 29,7 | 29,7 | KFDEVLVNHFCEEF GK         | 16 | 666,65  | 1996,94 |
| 25320 | IPI00002966 | 31,1 | 31,1 | TSTVDLPIENQLLWQIDR        | 18 | 1071,07 | 2140,12 |
| 17312 | IPI00002966 | 53,2 | 53,2 | KPVVDCVVSVPFCFYTDAER      | 19 | 747,69  | 2240,06 |
| 5673  | IPI00018206 | 40,4 | 40,4 | (M)NLGVGAYR               | 9  | 498,75  | 995,49  |
| 5361  | IPI00018206 | 56   | 56   | VGAFT(M)VCK               | 9  | 514,75  | 1027,48 |
| 13810 | IPI00018206 | 51,4 | 51,4 | IAAAILNTPDLR              | 12 | 634,37  | 1266,73 |
| 20285 | IPI00018206 | 86,1 | 86,1 | TCGFDFTGAVEDISK           | 15 | 823,87  | 1645,73 |
| 14719 | IPI00303882 | 69,7 | 69,7 | LEENLPILQQPTEK            | 14 | 826,45  | 1650,88 |
| 16661 | IPI00303882 | 82,5 | 82,5 | IATSLDGFVDVASVQQQR        | 17 | 917,97  | 1833,92 |
| 24613 | IPI00303882 | 49,9 | 49,9 | DIAQQLQATCTSLGSSIQGLPTNVK | 25 | 877,45  | 2629,34 |
| 7000  | IPI00008274 | 44,4 | 44,4 | KEPAVLELEGK               | 11 | 404,90  | 1211,68 |
| 7635  | IPI00008274 | 41,6 | 41,6 | NSLDCEIVSAK               | 11 | 618,30  | 1234,59 |
| 18622 | IPI00008274 | 59,8 | 59,8 | LSDLLAPISEQIK             | 13 | 713,91  | 1425,81 |
| 6028  | IPI00297779 | 59,8 | 59,8 | ILIAN TG(M)DTDK           | 12 | 654,33  | 1306,64 |
| 9574  | IPI00297779 | 52,6 | 52,6 | GATQQILDEAER              | 12 | 665,83  | 1329,65 |
| 2795  | IPI00297779 | 29,2 | 29,2 | AAHSEGNTTAGLD(M)R         | 15 | 516,24  | 1545,68 |
| 19702 | IPI00297779 | 49,5 | 49,5 | SLHDALCVLAQTVK            | 14 | 518,95  | 1553,82 |
| 20457 | IPI00297779 | 41,5 | 41,5 | LALVTGGEIASTFDHPELVK      | 20 | 699,71  | 2096,12 |
| 6690  | IPI00643041 | 39,6 | 39,6 | LVLVDGGGTGK               | 11 | 508,29  | 1014,57 |
| 13055 | IPI00643041 | 40,8 | 40,8 | VCENIPIVLCGNK             | 13 | 758,39  | 1514,76 |
| 20800 | IPI00643041 | 89,6 | 89,6 | SNYNFEKPFLWLAR            | 14 | 595,64  | 1783,90 |
| 21245 | IPI00334587 | 63,5 | 63,5 | GFGFILFK                  | 8  | 464,77  | 927,52  |
| 12173 | IPI00334587 | 79,8 | 79,8 | IFVGGLNPEATEEK            | 14 | 752,39  | 1502,76 |
| 10905 | IPI00018465 | 46,7 | 46,7 | YNFFTGC PK                | 9  | 567,26  | 1132,50 |
| 5623  | IPI00018465 | 82,6 | 82,6 | GGAEQF(M)EETER            | 12 | 700,29  | 1398,57 |
| 11367 | IPI00018465 | 68,9 | 68,9 | TFSYAGFE(M)QPK            | 12 | 711,32  | 1420,63 |
| 27173 | IPI00024993 | 34,3 | 34,3 | ALNALCDGLIDELNQALK        | 18 | 986,01  | 1970,01 |
| 28533 | IPI00024993 | 96,9 | 96,9 | ICPVETLVEEAIQCAEK         | 17 | 663,66  | 1987,96 |
| 20350 | IPI00024993 | 61,8 | 61,8 | AQFAQPEILIGTIPGAGGTQR     | 21 | 1063,07 | 2124,13 |
| 6920  | IPI00022774 | 69,7 | 69,7 | KGDIFLVR                  | 8  | 474,29  | 946,56  |
| 10985 | IPI00022774 | 37,2 | 37,2 | GDDLSTAILK                | 10 | 516,78  | 1031,55 |

|       |             |      |                                          |    |         |         |
|-------|-------------|------|------------------------------------------|----|---------|---------|
| 13390 | IPI00022774 | 54,3 | 54,3 (M)DELQLFR                          | 8  | 534,26  | 1066,51 |
| 12010 | IPI00022774 | 32,4 | 32,4 GILLYGPPGTGK                        | 12 | 586,84  | 1171,66 |
| 10807 | IPI00022774 | 51   | 51 WALSQSNPSALR                          | 12 | 665,35  | 1328,68 |
| 13978 | IPI00022774 | 49,9 | 49,9 LGDVISIQPCPDVK                      | 14 | 770,91  | 1539,80 |
| 21960 | IPI00022774 | 42,5 | 42,5 LDQLIYIPLPDEK                       | 13 | 778,93  | 1555,85 |
| 28670 | IPI00022774 | 42   | 42 NAPAIIFIDELDAIAPK                     | 17 | 604,34  | 1809,99 |
| 18230 | IPI00022774 | 33,1 | 33,1 VVETDPSPYCVIVAPDTVHCEGEPIK          | 26 | 975,81  | 2924,39 |
| 5711  | IPI00024919 | 38,5 | 38,5 GTAVV(N)GEFK                        | 10 | 511,76  | 1021,51 |
| 8601  | IPI00024919 | 60,2 | 60,2 HLSVNDLPVGR                         | 11 | 603,83  | 1205,65 |
| 8869  | IPI00024919 | 52   | 52 HLSV(N)DLPVGR                         | 11 | 604,32  | 1206,64 |
| 22140 | IPI00024919 | 55,5 | 55,5 GLFIIDP(N)GVK                       | 12 | 643,87  | 1285,73 |
| 21818 | IPI00024919 | 97,7 | 97,7 DYGVLLLEGSGLALR                     | 14 | 731,90  | 1461,78 |
| 14974 | IPI00024919 | 30,9 | 30,9 AFQYVETHGEVCPANWTPDSPTIKPSPAASK     | 31 | 847,16  | 3384,61 |
| 13300 | IPI00220301 | 39,7 | 39,7 VVVFVFGPDK                          | 9  | 504,28  | 1006,55 |
| 17392 | IPI00220301 | 71,4 | 71,4 LPFPIIDDR                           | 9  | 543,30  | 1084,59 |
| 12998 | IPI00220301 | 47,6 | 47,6 DFTPVCTTELGR                        | 12 | 698,33  | 1394,65 |
| 24693 | IPI00220301 | 65   | 65 FHDFLGDSWGILFSHPR                     | 17 | 508,50  | 2029,98 |
| 21230 | IPI00220301 | 87,3 | 87,3 PGGLLLGDVAPNFEANTTVGR               | 21 | 1049,55 | 2097,08 |
| 22950 | IPI00643920 | 49,9 | 49,9 LDNLVAILDINR                        | 12 | 684,90  | 1367,78 |
| 16649 | IPI00643920 | 46,2 | 46,2 VLDPFTIKPLDR                        | 12 | 471,94  | 1412,80 |
| 12873 | IPI00643920 | 44,7 | 44,7 SVPTSTVFYPSDGVATEK                  | 18 | 942,96  | 1883,91 |
| 30690 | IPI00643920 | 36,6 | 36,6 NMAEQIIQEIYSQIQSK                   | 17 | 675,01  | 2022,01 |
| 27338 | IPI00643920 | 57,5 | 57,5 N(M)AEQIIQEIYSQIQSK                 | 17 | 680,34  | 2038,00 |
| 8233  | IPI00643920 | 38,2 | 38,2 LGQSDPAPLQH(Q)DIYQK                 | 18 | 695,67  | 2084,00 |
| 11325 | IPI00643920 | 61,1 | 61,1 TSRPENAIYNNNEDFQVGQAK               | 22 | 836,74  | 2507,20 |
| 25855 | IPI00643920 | 50,6 | 50,6 SKDDQVTVIGAGVTLHEALAAAELLK          | 26 | 663,12  | 2648,44 |
| 4793  | IPI00218733 | 68,6 | 68,6 HVGDLGNVTADK                        | 12 | 613,31  | 1224,61 |
| 22403 | IPI00218733 | 35,8 | 35,8 HVGDLGNVTADKDGADVSIEDSVISLSGDHCIIGR | 36 | 930,96  | 3719,80 |
| 11425 | IPI00218084 | 57,5 | 57,5 (N)GFVVLK                           | 7  | 389,23  | 776,44  |
| 4293  | IPI00218084 | 42,8 | 42,8 LPEGDLGK                            | 8  | 414,73  | 827,44  |
| 17647 | IPI00218084 | 68,5 | 68,5 VHLVGIDIFTGK                        | 12 | 433,59  | 1297,74 |
| 8008  | IPI00218084 | 97,8 | 97,8 KYEDICPSTHN(M)DVPNIK                | 18 | 726,34  | 2175,99 |

|                   |      |                                  |    |        |         |
|-------------------|------|----------------------------------|----|--------|---------|
| 7928 IPI00302927  | 57,5 | 57,5 TGCNVLLIQK                  | 10 | 573,32 | 1144,63 |
| 11968 IPI00302927 | 75,1 | 75,1 VIDPATATSVDLR               | 13 | 679,37 | 1356,72 |
| 11315 IPI00302927 | 46,9 | 46,9 ETLLNSATTSLNSK              | 14 | 739,89 | 1477,76 |
| 19465 IPI00302927 | 37,9 | 37,9 ALIAGGGAPEIELALR            | 16 | 775,95 | 1549,88 |
| 9139 IPI00025252  | 41   | 41 YGVSGYPTLK                    | 10 | 542,79 | 1083,56 |
| 16736 IPI00025252 | 37,3 | 37,3 GFPTIYFSPANK                | 12 | 671,35 | 1340,68 |
| 5963 IPI00025252  | 41,5 | 41,5 SEPIPESNDGPVK               | 13 | 684,84 | 1367,66 |
| 23548 IPI00025252 | 83,2 | 83,2 ELSDFISYLQR                 | 11 | 685,85 | 1369,69 |
| 4961 IPI00025252  | 59,6 | 59,6 EATNPPVIQEEKPK              | 14 | 790,42 | 1578,82 |
| 23873 IPI00025252 | 55   | 55 TFSHELSDFGLESTAGEIPVVAIR      | 24 | 859,11 | 2574,30 |
| 12028 IPI00745851 | 71   | 71 SFDLLVK                       | 7  | 411,24 | 820,47  |
| 12950 IPI00745851 | 53,1 | 53,1 WDYLTQVEK                   | 9  | 591,30 | 1180,58 |
| 7515 IPI00745851  | 69   | 69 ISNYGWDQSDK                   | 11 | 656,79 | 1311,57 |
| 14220 IPI00745851 | 62   | 62 KAELLDNEKPAAVVAPITTYTVK       | 24 | 843,47 | 2527,39 |
| 17762 IPI00745851 | 33,2 | 33,2 IYITLTGVHQPVTENVQVHFTER     | 23 | 671,11 | 2680,40 |
| 20657 IPI00003377 | 85,5 | 85,5 NPPGFAFVEFEDPR              | 14 | 811,39 | 1620,76 |
| 10702 IPI00015953 | 47   | 47 APQVLVLAPTR                   | 11 | 582,86 | 1163,70 |
| 10452 IPI00015953 | 30,9 | 30,9 STYEQVDLIGK                 | 11 | 626,82 | 1251,63 |
| 22925 IPI00015953 | 51   | 51 TFSFAIPLIEK                   | 11 | 633,36 | 1264,71 |
| 17822 IPI00015953 | 57,5 | 57,5 EGAFSNFPISEETIK             | 15 | 834,91 | 1667,80 |
| 17442 IPI00015953 | 57,9 | 57,9 WQLSVATEQPELEGPR            | 16 | 920,47 | 1838,92 |
| 19565 IPI00015953 | 95   | 95 LGVCFDVPTASVTEIQEK            | 18 | 997,00 | 1991,99 |
| 5303 IPI00215719  | 40,8 | 40,8 SQDIYLR                     | 7  | 447,74 | 893,46  |
| 6980 IPI00215719  | 82,7 | 82,7 GCGTVLLSGPR                 | 11 | 558,79 | 1115,58 |
| 19750 IPI00215719 | 99,9 | 99,9 ILTFDQLALDSPK               | 13 | 730,90 | 1459,79 |
| 15806 IPI00413108 | 63,6 | 63,6 SDGIYIINLK                  | 10 | 568,32 | 1134,63 |
| 10359 IPI00413108 | 35,9 | 35,9 YVDIAIPCNNK                 | 11 | 653,83 | 1305,64 |
| 17397 IPI00413108 | 99,3 | 99,3 AIVAIENPADVSVISSR           | 17 | 870,98 | 1739,94 |
| 22438 IPI00413108 | 97,2 | 97,2 ADHQPLTEASYVNLPTIALCNTDSPLR | 27 | 999,50 | 2995,47 |
| 5236 IPI00025849  | 34,4 | 34,4 ELVLDNSR                    | 8  | 473,25 | 944,49  |
| 12185 IPI00025849 | 30,2 | 30,2 DLSTIEPLK                   | 9  | 508,29 | 1014,56 |
| 20137 IPI00025849 | 59,9 | 59,9 LLPQLTYLDGYDR               | 13 | 783,91 | 1565,81 |

|       |             |      |      |                                  |    |         |         |
|-------|-------------|------|------|----------------------------------|----|---------|---------|
| 22138 | IPI00025849 | 86,7 | 86,7 | SLDLFNCEVTNLNDYR                 | 16 | 986,96  | 1971,90 |
| 10249 | IPI00010796 | 39,1 | 39,1 | DGVVLFK                          | 7  | 389,23  | 776,44  |
| 20780 | IPI00010796 | 62,6 | 62,6 | ENLLDFIK                         | 8  | 496,28  | 990,54  |
| 6947  | IPI00010796 | 71,7 | 71,7 | SNFAEALAAHK                      | 11 | 579,80  | 1157,58 |
| 7580  | IPI00010796 | 63,6 | 63,6 | LITLEEE(M)TK                     | 10 | 611,82  | 1221,62 |
| 13785 | IPI00010796 | 63,4 | 63,4 | VDATEESDLAQQYGVR                 | 16 | 890,92  | 1779,83 |
| 7487  | IPI00221222 | 53,1 | 53,1 | DDN(M)FQIGK                      | 9  | 542,24  | 1082,47 |
| 18730 | IPI00221222 | 83,1 | 83,1 | GISLNPEQWSQLK                    | 13 | 750,40  | 1498,78 |
| 13403 | IPI00420096 | 43,2 | 43,2 | SSIAGLLLK                        | 9  | 451,29  | 900,56  |
| 11885 | IPI00420096 | 33,4 | 33,4 | LEQLFQDEVAK                      | 11 | 660,35  | 1318,68 |
| 15426 | IPI00420096 | 33,2 | 33,2 | VLALPEPSPAAPTLR                  | 15 | 766,45  | 1530,88 |
| 13783 | IPI00420096 | 99,5 | 99,5 | LQEAGILSAEELQR                   | 14 | 778,92  | 1555,82 |
| 29948 | IPI00420096 | 66,7 | 66,7 | DGHNLISLLEVLSGDSLPR              | 19 | 679,03  | 2034,07 |
| 24180 | IPI00420096 | 31,2 | 31,2 | GFFDPNTHENLTYLQLLER              | 19 | 769,72  | 2306,13 |
| 22818 | IPI00072377 | 57,8 | 57,8 | IDFYFDENPYFENK                   | 14 | 920,91  | 1839,80 |
| 14454 | IPI00072377 | 86,7 | 86,7 | EQQEAIEHIDEVQNEIDR               | 18 | 732,35  | 2194,02 |
| 6657  | IPI00017297 | 42,7 | 42,7 | TEEGPTLSYGR                      | 11 | 605,29  | 1208,57 |
| 13250 | IPI00017297 | 53,5 | 53,5 | LCSLFYTNEEVAK                    | 13 | 787,38  | 1572,75 |
| 25383 | IPI00017297 | 94,6 | 94,6 | ITPENLPQILLQLK                   | 14 | 540,66  | 1618,97 |
| 21243 | IPI00017297 | 61,6 | 61,6 | IGPYQPNVPVVGIDYVIPK              | 18 | 985,04  | 1968,07 |
| 8734  | IPI00027626 | 36,4 | 36,4 | ETLIDVAR                         | 8  | 458,76  | 915,50  |
| 5158  | IPI00027626 | 32,1 | 32,1 | SETDTSLIR                        | 9  | 511,26  | 1020,51 |
| 34004 | IPI00027626 | 74,5 | 74,5 | VHAELADVLTEAVVDSILAIK            | 21 | 552,31  | 2205,22 |
| 17767 | IPI00025366 | 73,3 | 73,3 | GLVYETSVLDPDEGIR                 | 16 | 881,95  | 1761,88 |
| 12225 | IPI00552715 | 42   | 42   | AVAQALEVIPR                      | 11 | 583,85  | 1165,68 |
| 17657 | IPI00552715 | 47,3 | 47,3 | TAVETAVLLLR                      | 11 | 593,36  | 1184,71 |
| 19705 | IPI00552715 | 51,2 | 51,2 | ELGIWEPLAVK                      | 11 | 627,86  | 1253,70 |
| 14706 | IPI00552715 | 83,8 | 83,8 | IPGGHIEDSCVLR                    | 13 | 714,88  | 1427,74 |
| 29905 | IPI00552715 | 34   | 34   | IL(Q)(M)EEEYIQQLCEDIIQLKPDVVITEK | 28 | 1145,58 | 3433,73 |
| 4543  | IPI00293434 | 66,8 | 66,8 | KGTVEGFEPADNK                    | 13 | 696,34  | 1390,67 |
| 23725 | IPI00293434 | 97   | 97   | VLLESEQFLTELTR                   | 14 | 839,46  | 1676,90 |
| 10895 | IPI00293276 | 95,1 | 95,1 | P(M)FIVNTNVPR                    | 11 | 652,34  | 1302,67 |

|                   |      |                               |    |        |         |
|-------------------|------|-------------------------------|----|--------|---------|
| 4240 IPI00329389  | 46   | 46 YEITEQR                    | 7  | 469,73 | 937,45  |
| 5221 IPI00329389  | 99,8 | 99,8 HQEGEIFDTEK              | 11 | 666,81 | 1331,60 |
| 27513 IPI00329389 | 72   | 72 ASITPGTILILTGR             | 15 | 509,32 | 1524,92 |
| 19882 IPI00296337 | 65,7 | 65,7 IPALDLLIK                | 9  | 498,33 | 994,64  |
| 5238 IPI00296337  | 42,1 | 42,1 FNNYVDC(M)K              | 9  | 603,75 | 1205,48 |
| 18757 IPI00296337 | 63,4 | 63,4 GLSSLLCNFTK              | 11 | 620,32 | 1238,63 |
| 10602 IPI00296337 | 64,5 | 64,5 SQGCSEQVLTVLK            | 13 | 724,87 | 1447,73 |
| 24150 IPI00296337 | 38,6 | 38,6 NILEESLCEL VAK           | 13 | 759,40 | 1516,78 |
| 24535 IPI00296337 | 62,8 | 62,8 E(M)KPVIFLDVFLPR         | 14 | 573,99 | 1718,94 |
| 18902 IPI00296337 | 43,3 | 43,3 TVSLLDENNVSSYLSK         | 16 | 884,95 | 1767,89 |
| 21073 IPI00296337 | 44,5 | 44,5 TVGALQVLGTEAQSSLLK       | 18 | 908,02 | 1814,02 |
| 7062 IPI00550021  | 40,8 | 40,8 IGQGYLIK                 | 8  | 446,27 | 890,52  |
| 7140 IPI00550021  | 83,1 | 83,1 HGSLGFLPR                | 9  | 492,27 | 982,53  |
| 5138 IPI00550021  | 39,5 | 39,5 NNASTDYDLSDK             | 12 | 671,79 | 1341,57 |
| 6567 IPI00550021  | 92,8 | 92,8 TVFAEHISDECK             | 12 | 718,33 | 1434,64 |
| 23913 IPI00550021 | 88,6 | 88,6 SINPLGGFVHYGEVTNDFV(M)LK | 22 | 818,41 | 2452,21 |
| 17144 IPI00031804 | 90,2 | 90,2 LTLSALIDGK               | 10 | 515,81 | 1029,61 |
| 19115 IPI00031804 | 44,3 | 44,3 LTLDTIFVPNTGK            | 13 | 709,90 | 1417,78 |
| 8504 IPI00302925  | 35   | 35 LATNAAVTVLR                | 11 | 564,84 | 1127,67 |
| 14003 IPI00302925 | 47,4 | 47,4 FAEAFAEIPR               | 10 | 575,80 | 1149,58 |
| 4560 IPI00302925  | 85,5 | 85,5 GEENL(M)DAQVK            | 11 | 625,29 | 1248,57 |
| 8839 IPI00302925  | 69,7 | 69,7 HFSGLEEA VYR             | 11 | 654,32 | 1306,63 |
| 14904 IPI00302925 | 65,3 | 65,3 IAVYSCPDFG(M)ITETK       | 16 | 924,43 | 1846,85 |
| 7858 IPI00219757  | 65,4 | 65,4 ASCLYGQLPK               | 10 | 568,79 | 1135,57 |
| 16864 IPI00219757 | 88   | 88 PPYTVVYFPVR                | 11 | 669,37 | 1336,72 |
| 19270 IPI00219757 | 68,6 | 68,6 ALPGQLKPFETLLSQNQGGK     | 20 | 709,39 | 2125,15 |
| 8691 IPI00030154  | 45,2 | 45,2 IVVLLQR                  | 7  | 420,79 | 839,56  |
| 16746 IPI00030154 | 54,5 | 54,5 APLDIPVPDPVK             | 12 | 630,86 | 1259,71 |
| 16924 IPI00030154 | 57,5 | 57,5 TENLLGSYFPK              | 11 | 634,83 | 1267,64 |
| 25340 IPI00030154 | 70,3 | 70,3 NAYAVLYDIILK             | 12 | 698,40 | 1394,78 |
| 6830 IPI00012074  | 30,4 | 30,4 SAFLCGV(M)K              | 9  | 514,75 | 1027,48 |
| 16164 IPI00012074 | 43,6 | 43,6 ENILEEFSK                | 9  | 554,78 | 1107,54 |

|                   |      |                                 |    |         |         |
|-------------------|------|---------------------------------|----|---------|---------|
| 8711 IPI00012074  | 77,4 | 77,4 TGYTLDVTTGQR               | 12 | 656,33  | 1310,65 |
| 13708 IPI00012074 | 50,2 | 50,2 GFCFLEYEDHK                | 11 | 482,21  | 1443,61 |
| 6885 IPI00020599  | 36,1 | 36,1 VHVIFNYK                   | 8  | 510,29  | 1018,56 |
| 14364 IPI00020599 | 51,9 | 51,9 EQFLDGDGWTSR               | 12 | 705,82  | 1409,62 |
| 6487 IPI00020599  | 46,1 | 46,1 IKDPDASKPEDWDER            | 15 | 600,95  | 1799,83 |
| 18485 IPI00020599 | 31,3 | 31,3 KPEDWDEE(M)DGEWEPPVIQNPEYK | 24 | 992,77  | 2975,28 |
| 8714 IPI00030179  | 36,8 | 36,8 AGNFYVPAEPK                | 11 | 596,80  | 1191,59 |
| 21888 IPI00030179 | 31,5 | 31,5 EANNFLWPFK                 | 10 | 633,32  | 1264,62 |
| 23333 IPI00030179 | 42,2 | 42,2 EA(N)NFLWPFK               | 10 | 633,81  | 1265,61 |
| 23333 IPI00030179 | 42,2 | 42,2 EAN(N)FLWPFK               | 10 | 633,81  | 1265,61 |
| 23135 IPI00030179 | 47,2 | 47,2 YGIIC(M)EDLIHEIYTVGK       | 18 | 724,02  | 2169,05 |
| 4840 IPI00013894  | 56,9 | 56,9 ALDLDSCK                   | 9  | 504,74  | 1007,46 |
| 4858 IPI00013894  | 41   | 41 LILEQ(M)QK                   | 8  | 509,78  | 1017,55 |
| 14245 IPI00013894 | 37,9 | 37,9 L(M)DVGLIAIR               | 10 | 558,83  | 1115,64 |
| 5438 IPI00013894  | 46,3 | 46,3 DPQALSEHLK                 | 10 | 569,30  | 1136,58 |
| 24283 IPI00013894 | 99,8 | 99,8 ALSVGNIDDALQCYSEAIK        | 19 | 1034,01 | 2066,00 |
| 21438 IPI00217030 | 39,3 | 39,3 TDITYPAGF(M)DVISIDK        | 17 | 951,46  | 1900,91 |
| 5848 IPI00009032  | 40,6 | 40,6 GQVLNIQ(M)R                | 9  | 537,79  | 1073,56 |
| 22358 IPI00009032 | 66,7 | 66,7 ETDLLILFK                  | 9  | 546,32  | 1090,63 |
| 5638 IPI00009032  | 46,1 | 46,1 AEL(M)EISEDK               | 10 | 590,77  | 1179,53 |
| 5063 IPI00009032  | 91,2 | 91,2 IIEDQQESLNK                | 11 | 658,84  | 1315,66 |
| 5416 IPI00001960  | 88,4 | 88,4 HPESNTAG(M)DIFAK           | 14 | 767,35  | 1532,69 |
| 20927 IPI00001960 | 32,1 | 32,1 EEDKEPLIELFVK              | 13 | 530,29  | 1587,84 |
| 23660 IPI00001960 | 31,1 | 31,1 IEEFLEEVLCPPK              | 13 | 534,94  | 1601,80 |
| 8296 IPI00001960  | 83,8 | 83,8 AGSDGESIGNCPFSQR           | 16 | 841,36  | 1680,72 |
| 19312 IPI00001960 | 48,3 | 48,3 FLDGNE(M)TLADCNLLPK        | 17 | 983,97  | 1965,92 |
| 10595 IPI00023785 | 32,1 | 32,1 GVEICIATPGR                | 11 | 586,81  | 1171,60 |
| 11470 IPI00023785 | 94,4 | 94,4 APILIA TDVASR              | 12 | 613,86  | 1225,70 |
| 16759 IPI00023785 | 63,4 | 63,4 GDGPICLV LAPTR             | 13 | 684,87  | 1367,72 |
| 15454 IPI00023785 | 83   | 83 ELAQQVQQVADDY GK             | 15 | 846,42  | 1690,82 |
| 13748 IPI00290566 | 58,3 | 58,3 EQLAIAEFAR                 | 10 | 574,31  | 1146,60 |
| 14544 IPI00290566 | 51,4 | 51,4 IA CLDFS LQK               | 10 | 597,81  | 1193,61 |



|                   |      |                                    |    |         |         |
|-------------------|------|------------------------------------|----|---------|---------|
| 15756 IPI00290566 | 41,7 | 41,7 ICDDELILIK                    | 10 | 616,33  | 1230,65 |
| 16984 IPI00290566 | 67,7 | 67,7 YINENLIVNTDELGR               | 15 | 881,95  | 1761,89 |
| 16977 IPI00742905 | 56   | 56 DFNLYLVR                        | 8  | 513,27  | 1024,53 |
| 32873 IPI00742905 | 72,6 | 72,6 ETPFELIEALLK                  | 12 | 701,89  | 1401,77 |
| 4618 IPI00010779  | 59,6 | 59,6 AEGDVAALNR                    | 10 | 508,26  | 1014,51 |
| 14456 IPI00010779 | 34,5 | 34,5 LVILEGELER                    | 10 | 585,84  | 1169,67 |
| 25020 IPI00010779 | 73,4 | 73,4 EENVGLHQTLQTLNELNCI           | 20 | 1170,56 | 2339,11 |
| 14053 IPI00075248 | 49,5 | 49,5 EAFSLFDK                      | 8  | 478,74  | 955,46  |
| 13648 IPI00075248 | 65,3 | 65,3 VFDKDG(N)GYISAAELR            | 16 | 585,96  | 1754,85 |
| 15044 IPI00075248 | 39,9 | 39,9 EAFSLFDKDGDTITTK              | 17 | 615,63  | 1843,88 |
| 7002 IPI00219678  | 53   | 53 GVFNVQ(M)EPK                    | 10 | 582,79  | 1163,56 |
| 5248 IPI00219678  | 32,2 | 32,2 YV(M)TTTTLER                  | 10 | 615,81  | 1229,60 |
| 6614 IPI00219678  | 56,2 | 56,2 VVTDTDETELAR                  | 12 | 674,83  | 1347,65 |
| 4988 IPI00219678  | 86,4 | 86,4 AGLNCSTEN(M)PIK               | 13 | 725,84  | 1449,66 |
| 5318 IPI00016610  | 71,3 | 71,3 INISEGNCPER                   | 11 | 644,80  | 1287,59 |
| 17787 IPI00016610 | 54,5 | 54,5 IITLTGPTNAIFK                 | 13 | 694,91  | 1387,81 |
| 11833 IPI00016610 | 33,6 | 33,6 LVVPATQCGSLIGK                | 14 | 721,91  | 1441,80 |
| 15299 IPI00016610 | 72   | 72 AITIAGVPQSVTECVK                | 16 | 836,95  | 1671,89 |
| 14966 IPI00009342 | 30,8 | 30,8 IFYPETTDIYDR                  | 12 | 766,87  | 1531,72 |
| 14701 IPI00009342 | 45,6 | 45,6 FFQTACDVPELQDK                | 14 | 849,40  | 1696,78 |
| 17002 IPI00009342 | 45,4 | 45,4 VDQIQEIVTGNPTVIK              | 16 | 877,49  | 1752,96 |
| 24998 IPI00009342 | 82,3 | 82,3 ILAIGLINEALDEGDAQK            | 18 | 942,01  | 1882,01 |
| 18257 IPI00009342 | 31,3 | 31,3 SPDVGLYGVIEPCGETYHSDLAEAK     | 25 | 903,09  | 2706,25 |
| 21710 IPI00009342 | 47,3 | 47,3 FQPGETLTEILETPATSEQEAHQ       | 25 | 947,79  | 2840,35 |
| 35274 IPI00009342 | 30,2 | 30,2 IGGILANELSVDEAALHAAVIAINEAIDR | 29 | 986,86  | 2957,57 |
| 27170 IPI00045109 | 66   | 66 LLGGVTIAQGGVLPNIQAVLLPK         | 23 | 757,80  | 2270,37 |
| 16466 IPI00017617 | 30,6 | 30,6 FVINYDYPNSSEDIHR              | 17 | 711,33  | 2130,96 |
| 13835 IPI00013296 | 48,6 | 48,6 IAFAITAIK                     | 9  | 474,30  | 946,59  |
| 17667 IPI00013296 | 66,4 | 66,4 IPDWFLNR                      | 8  | 530,78  | 1059,55 |
| 4938 IPI00013296  | 66   | 66 VITI(M)QNPR                     | 9  | 544,30  | 1086,59 |
| 8356 IPI00013296  | 54,9 | 54,9 YSQVLA(N)GLDNK                | 12 | 661,83  | 1321,65 |
| 17722 IPI00291005 | 41,4 | 41,4 FVEGLPINDFSR                  | 12 | 697,36  | 1392,70 |

|                   |      |                                         |    |         |         |
|-------------------|------|-----------------------------------------|----|---------|---------|
| 18167 IPI00291005 | 30,5 | 30,5 FVEGLPI(N)DFSR                     | 12 | 697,85  | 1393,69 |
| 7090 IPI00013895  | 54,7 | 54,7 DGYNYTLK                           | 9  | 530,75  | 1059,49 |
| 35064 IPI00013895 | 40,7 | 40,7 LDTNSDGQLDFSEFLNLIGGLA(M)ACHDSFLK  | 31 | 1148,87 | 3443,59 |
| 33511 IPI00013895 | 71   | 71 KLDTNSDGQLDFSEFLNLIGGLA(M)ACHDSFLK   | 32 | 893,93  | 3571,69 |
| 13745 IPI00219525 | 81,8 | 81,8 GILFVGSVSGGEEGAR                   | 17 | 796,41  | 1590,80 |
| 27150 IPI00219525 | 74   | 74 NPELQNLLLDFFK                        | 14 | 853,44  | 1704,87 |
| 24460 IPI00219525 | 67   | 67 LVPLLDTGDIIDGGNSEYR                  | 20 | 1080,56 | 2159,11 |
| 9716 IPI00032826  | 67,3 | 67,3 AIEINPDSAQPYK                      | 13 | 723,37  | 1444,72 |
| 16817 IPI00032826 | 52,8 | 52,8 LLGHWEAAHDLALACK                   | 17 | 484,25  | 1932,95 |
| 14314 IPI00335168 | 66,4 | 66,4 EAFQLFDR                           | 8  | 513,26  | 1024,50 |
| 6277 IPI00335168  | 78,8 | 78,8 ILYSQCGDV(M)R                      | 11 | 679,32  | 1356,62 |
| 21898 IPI00017672 | 62,1 | 62,1 FEVGDIMLIR                         | 10 | 596,82  | 1191,63 |
| 11195 IPI00017672 | 63   | 63 NTAEWLLSHTK                          | 11 | 650,34  | 1298,66 |
| 15859 IPI00017672 | 34,5 | 34,5 DHINLPGFSGQNPLR                    | 15 | 555,62  | 1663,84 |
| 15529 IPI00017672 | 51,9 | 51,9 LGADAVG(M)STVPEVIVAR               | 18 | 900,98  | 1799,95 |
| 4378 IPI00219005  | 45,5 | 45,5 ALELDSNNEK                         | 10 | 566,78  | 1131,54 |
| 9836 IPI00219005  | 63,5 | 63,5 RGEAHLAVNDFELAR                    | 15 | 566,63  | 1696,86 |
| 22545 IPI00219005 | 81,9 | 81,9 FEIGEGENLDLPYGLER                  | 17 | 975,98  | 1949,94 |
| 19530 IPI00215914 | 60   | 60 NISFTVWDVGGQDK                       | 14 | 783,38  | 1564,75 |
| 25240 IPI00215914 | 62   | 62 LGEIVTTIPTIGFNVETVEYK                | 21 | 1162,12 | 2322,23 |
| 10657 IPI00024145 | 39,4 | 39,4 YQLDPTASISAK                       | 12 | 647,34  | 1292,66 |
| 13658 IPI00024145 | 74,7 | 74,7 LTFDITTFSPNTGK                     | 13 | 714,85  | 1427,69 |
| 16101 IPI00024145 | 68,1 | 68,1 WCEYGLTFTEK                        | 11 | 717,32  | 1432,63 |
| 5096 IPI00216587  | 65,4 | 65,4 ADGYVLEGK                          | 9  | 476,24  | 950,47  |
| 14158 IPI00216587 | 64,1 | 64,1 NCIVLIDSTPYR                       | 12 | 725,87  | 1449,73 |
| 17514 IPI00216587 | 95,6 | 95,6 LDVGNFSWGSECCTR                    | 15 | 894,38  | 1786,74 |
| 20517 IPI00027442 | 82,2 | 82,2 DIINEEVQFLK                        | 12 | 738,88  | 1475,75 |
| 29643 IPI00027442 | 68   | 68 NVGCLQEALQLATSFAQLR                  | 19 | 707,04  | 2118,09 |
| 29618 IPI00027442 | 31,9 | 31,9 NVGCL(Q)EALQLATSFAQLR              | 19 | 707,37  | 2119,09 |
| 29618 IPI00027442 | 31,9 | 31,9 NVGCLQEAL(Q)LATSFAQLR              | 19 | 707,37  | 2119,09 |
| 26040 IPI00027442 | 52,2 | 52,2 VVSIGVPVSELLDDPSGPAGSLTSVEFCGGTHLR | 34 | 1151,58 | 3451,73 |
| 10159 IPI00005198 | 84,7 | 84,7 VLQSALAAIR                         | 10 | 521,32  | 1040,63 |

|                   |      |                                       |    |         |         |
|-------------------|------|---------------------------------------|----|---------|---------|
| 19987 IPI00005198 | 95,7 | 95,7 ILPTLEAVAALGNK                   | 14 | 705,42  | 1408,83 |
| 20897 IPI00021290 | 74   | 74 LGLVGVNLTLDGVK                     | 14 | 699,42  | 1396,83 |
| 21480 IPI00021290 | 36,5 | 36,5 TIAIIAEGIPEALTR                  | 15 | 784,46  | 1566,90 |
| 29498 IPI00021290 | 51,8 | 51,8 DLVSSLTSGLLTIGDR                 | 16 | 823,95  | 1645,89 |
| 22263 IPI00021290 | 29,4 | 29,4 LLQDHPWLLSQNLVVKPDQLIK           | 22 | 650,13  | 2596,47 |
| 18545 IPI00008529 | 98,4 | 98,4 NIEDVIAQGIGK                     | 12 | 628,85  | 1255,68 |
| 12483 IPI00008529 | 96,1 | 96,1 LASVPAGGAVAVSAAPGSAAPAAGSAPAAAEK | 33 | 925,48  | 2773,42 |
| 4368 IPI00641829  | 52,9 | 52,9 ILNDVQDR                         | 8  | 486,76  | 971,50  |
| 18102 IPI00641829 | 51,9 | 51,9 DFLLKPELLR                       | 10 | 415,25  | 1242,73 |
| 5173 IPI00010740  | 34,1 | 34,1 AVVIVDDR                         | 8  | 443,75  | 885,49  |
| 10324 IPI00010740 | 61,1 | 61,1 YGEPGEVFINK                      | 11 | 626,81  | 1251,61 |
| 22460 IPI00010740 | 74,8 | 74,8 LFVGNLPADITEDEFK                 | 16 | 904,46  | 1806,90 |
| 27050 IPI00023860 | 47,4 | 47,4 GIPEFWLTVFK                      | 11 | 668,87  | 1335,72 |
| 17965 IPI00023860 | 72,1 | 72,1 YAVLYQPLFDK                      | 11 | 678,86  | 1355,71 |
| 21083 IPI00023860 | 91,2 | 91,2 LDGLVETPTGYIESLPR                | 17 | 930,49  | 1858,97 |
| 11510 IPI00215884 | 37,1 | 37,1 DGTGVVEFVR                       | 10 | 539,78  | 1077,55 |
| 10056 IPI00215884 | 88,7 | 88,7 EAGDVCYADVYR                     | 12 | 709,31  | 1416,60 |
| 21385 IPI00215884 | 53,1 | 53,1 GGPPFAFVEFEDPR                   | 14 | 782,88  | 1563,74 |
| 16536 IPI00304596 | 75,9 | 75,9 FGQAAT(M)EGIGAIGGTPPAFNR         | 22 | 1090,03 | 2178,05 |
| 34404 IPI00304596 | 47,5 | 47,5 NLPQYVSNELLEEAHSVFGQVER          | 23 | 890,11  | 2667,31 |
| 4973 IPI00012066  | 36,1 | 36,1 IANPVEGSTDR                      | 11 | 579,79  | 1157,57 |
| 17842 IPI00012066 | 44,7 | 44,7 IITLAGPTNAIFK                    | 13 | 679,91  | 1357,80 |
| 11170 IPI00012066 | 58,4 | 58,4 LVVPASQCGSLIGK                   | 14 | 714,90  | 1427,78 |
| 23293 IPI00012066 | 31,9 | 31,9 AITIAGIPQSIIECVK                 | 16 | 571,66  | 1711,96 |
| 5701 IPI00453476  | 46,5 | 46,5 HGESAWNLENR                      | 11 | 438,21  | 1311,60 |
| 23843 IPI00453476 | 59,1 | 59,1 ALPFWNEEIVPQIK                   | 14 | 842,46  | 1682,90 |
| 14521 IPI00453476 | 78,3 | 78,3 YADLTEDQLPSCESLK                 | 16 | 934,93  | 1867,85 |
| 13915 IPI00453476 | 48,4 | 48,4 FSGWYDADLSPAGHEEAK               | 18 | 660,63  | 1978,87 |
| 28165 IPI00453476 | 41,1 | 41,1 HLEGLSEEAI(M)ELNLPTGIPIVYELDK    | 27 | 1013,86 | 3038,55 |
| 8218 IPI00410693  | 95,8 | 95,8 PGHLQEGFGCVVTNR                  | 15 | 557,61  | 1669,80 |
| 5541 IPI00555610  | 37,8 | 37,8 FS(M)PGFK                        | 7  | 415,20  | 828,38  |
| 10251 IPI00555610 | 40,9 | 40,9 GEGPDVDVNLPK                     | 12 | 620,31  | 1238,61 |

|                   |      |                                |    |         |         |
|-------------------|------|--------------------------------|----|---------|---------|
| 10411 IPI00555610 | 77,1 | 77,1 GEGPEVDVNLPK              | 12 | 627,32  | 1252,63 |
| 10119 IPI00555610 | 37,5 | 37,5 IS(M)PDVDLHLK             | 11 | 428,56  | 1282,66 |
| 16556 IPI00555610 | 34,1 | 34,1 GGVQVPAVDISSSLGGR         | 17 | 799,93  | 1597,84 |
| 16056 IPI00555610 | 39,6 | 39,6 VNVEAPDVNLEGLGGK          | 16 | 805,92  | 1609,83 |
| 26293 IPI00555610 | 32,1 | 32,1 LEGELQAPDLELSLPAIHVEGLDIK | 25 | 900,49  | 2698,44 |
| 12063 IPI00298547 | 55,4 | 55,4 GAEE(M)ETVIPVDV(M)R       | 15 | 854,40  | 1706,78 |
| 25953 IPI00298547 | 32,3 | 32,3 GLIAAICAGPTALLAHEIGFGSK   | 23 | 756,41  | 2266,22 |
| 21090 IPI00298547 | 70   | 70 EGPYDVVVLPGGNLGAQNLSESAAVK  | 26 | 1292,67 | 2583,32 |
| 4735 IPI00033494  | 42,9 | 42,9 ELLTT(M)GDR               | 9  | 526,26  | 1050,50 |
| 5763 IPI00033494  | 35,9 | 35,9 EAFN(M)IDQNR              | 10 | 627,28  | 1252,55 |
| 13555 IPI00033494 | 62,9 | 62,9 FTDEEVDELYR               | 11 | 708,32  | 1414,62 |
| 23375 IPI00033494 | 66,8 | 66,8 DGFIDKEDLHDMLASLGK        | 18 | 668,66  | 2002,97 |
| 29675 IPI00028109 | 35,1 | 35,1 ERPPNPIEFLASYLLK          | 16 | 629,68  | 1886,03 |
| 8661 IPI00024933  | 63,4 | 63,4 IGPLGLSPK                 | 9  | 441,28  | 880,54  |
| 18217 IPI00024933 | 36   | 36 QAQIEVVPSASALIK             | 16 | 833,99  | 1665,97 |
| 10545 IPI00024933 | 88,9 | 88,9 EILGTAQSVGCNVDGR          | 16 | 838,41  | 1674,80 |
| 20760 IPI00181306 | 92,3 | 92,3 IDLAVLLGK                 | 9  | 471,31  | 940,60  |
| 5468 IPI00015911  | 61   | 61 VCHAHPTLSEAFR               | 13 | 508,92  | 1523,73 |
| 23535 IPI00015911 | 97,8 | 97,8 NLGLEELGIELDPR            | 14 | 784,42  | 1566,83 |
| 6579 IPI00015911  | 56,2 | 56,2 SEEQLKEEGIEYK             | 13 | 527,93  | 1580,76 |
| 15166 IPI00647418 | 94,2 | 94,2 GQPAIIDGELYNEVK           | 15 | 823,43  | 1644,84 |
| 12318 IPI00654777 | 58,9 | 58,9 VIGTLLGTVDK               | 11 | 558,34  | 1114,66 |
| 13265 IPI00654777 | 90,6 | 90,6 VIGLSSDLQQVGGASAR         | 17 | 829,45  | 1656,88 |
| 35794 IPI00654777 | 82,5 | 82,5 IQDALSTVLQYAEDVLSGK       | 19 | 684,03  | 2049,06 |
| 11255 IPI00298363 | 67,4 | 67,4 IGGGIDVPVPR               | 11 | 540,31  | 1078,61 |
| 8506 IPI00298363  | 40,6 | 40,6 VQISPDSGGLPER             | 13 | 677,85  | 1353,69 |
| 11362 IPI00298363 | 32,8 | 32,8 MILIQDGSQNTNVDKPLR        | 18 | 681,36  | 2041,06 |
| 11392 IPI00298363 | 49,8 | 49,8 LASQGDSISSQLGPIHPPPR      | 20 | 686,36  | 2056,07 |
| 22398 IPI00031461 | 45,9 | 45,9 FVSISDLLVPK               | 11 | 609,36  | 1216,71 |
| 18700 IPI00031461 | 32,8 | 32,8 EIRPALELLEPIEQK           | 15 | 593,34  | 1777,00 |
| 30210 IPI00031461 | 50,7 | 50,7 VPSTEAEALASSLMGLFEK       | 19 | 660,67  | 1978,99 |
| 19927 IPI00031461 | 62,3 | 62,3 NPYYGGESASITPLEDLYK       | 19 | 1059,01 | 2116,00 |

|       |             |      |      |                            |    |         |         |
|-------|-------------|------|------|----------------------------|----|---------|---------|
| 29258 | IPI00031461 | 49,8 | 49,8 | FDLGQDVIDFTGHALALYR        | 19 | 717,70  | 2150,08 |
| 18900 | IPI00018140 | 47,8 | 47,8 | NLANTVTEEILEK              | 13 | 737,39  | 1472,77 |
| 24373 | IPI00018140 | 75,6 | 75,6 | EFNEDGALAVLQQFK            | 15 | 854,93  | 1707,85 |
| 4708  | IPI00175098 | 37,1 | 37,1 | EHVIEALR                   | 8  | 483,77  | 965,53  |
| 18835 | IPI00175098 | 75   | 75   | FNADEFEDMVAEK              | 13 | 772,83  | 1543,65 |
| 14105 | IPI00175098 | 98,4 | 98,4 | FNADEFED(M)VAEK            | 13 | 780,83  | 1559,64 |
| 6594  | IPI00217465 | 56,5 | 56,5 | ALAAAGYDVEK                | 11 | 554,29  | 1106,56 |
| 9479  | IPI00217465 | 67,4 | 67,4 | ASGPPVSELITK               | 12 | 599,84  | 1197,66 |
| 14776 | IPI00009790 | 34,8 | 34,8 | NVIFQPVAELK                | 11 | 629,36  | 1256,71 |
| 22640 | IPI00009790 | 63,5 | 63,5 | EWSGLLEELAR                | 11 | 651,84  | 1301,66 |
| 13865 | IPI00009790 | 64,3 | 64,3 | ELVVTQLGYDTR               | 12 | 697,37  | 1392,72 |
| 23763 | IPI00009790 | 99,2 | 99,2 | GITNLCVIGGDGSLTGANLFR      | 21 | 1068,05 | 2134,08 |
| 13218 | IPI00100160 | 68,8 | 68,8 | ALTLIAGSPLK                | 11 | 542,34  | 1082,67 |
| 23253 | IPI00100160 | 51   | 51   | LGTLSALDILIK               | 12 | 628,90  | 1255,78 |
| 16431 | IPI00100160 | 40,7 | 40,7 | FTISDHPQPIDPLLK            | 15 | 574,31  | 1719,92 |
| 29518 | IPI00100160 | 39,5 | 39,5 | LDIFEFLNHVEDGLK            | 15 | 596,98  | 1787,91 |
| 30303 | IPI00100160 | 36,1 | 36,1 | IDLRPVLGEGVPILASFLR        | 19 | 689,08  | 2064,21 |
| 13040 | IPI00218448 | 37,4 | 37,4 | GDEELDSLK                  | 10 | 559,78  | 1117,55 |
| 19952 | IPI00554681 | 83,2 | 83,2 | ILDVLEEIPK                 | 10 | 584,84  | 1167,67 |
| 28133 | IPI00554681 | 92,2 | 92,2 | KLEDQLQGGQLEEVILQAEHELNLAR | 26 | 744,15  | 2972,56 |
| 18645 | IPI00479366 | 47,5 | 47,5 | TYSYLTPDLWK                | 11 | 693,85  | 1385,69 |
| 13033 | IPI00479366 | 77,1 | 77,1 | SPYQEFTDHLVK               | 12 | 488,58  | 1462,71 |
| 25828 | IPI00479366 | 77,3 | 77,3 | SLEEIYLFSLPIK              | 13 | 776,44  | 1550,86 |
| 14145 | IPI00216106 | 47,5 | 47,5 | IGIVGLPNVGK                | 11 | 533,83  | 1065,65 |
| 27543 | IPI00216106 | 94,3 | 94,3 | IPAFLNVVDIAGLVK            | 15 | 784,97  | 1567,93 |
| 7502  | IPI00000105 | 73,2 | 73,2 | ALQPLEEGEDEEK              | 13 | 743,85  | 1485,68 |
| 7052  | IPI00000105 | 33,1 | 33,1 | VPHNAAVQVYDYR              | 13 | 511,26  | 1530,76 |
| 21225 | IPI00000105 | 72,7 | 72,7 | LAQDPFPLYPGEVLEK           | 16 | 908,48  | 1814,95 |
| 31153 | IPI00000105 | 31,1 | 31,1 | ALCLLLGPDFFTDVITIETADHAR   | 24 | 896,79  | 2687,35 |
| 4513  | IPI00719622 | 73,4 | 73,4 | VEF(M)DDTSR                | 9  | 558,24  | 1114,46 |
| 20310 | IPI00719622 | 87,2 | 87,2 | EGDVLTLLSER                | 12 | 680,85  | 1359,69 |
| 23503 | IPI00027107 | 75,9 | 75,9 | GEETPVIVGSALCALEGR         | 18 | 929,47  | 1856,93 |

|                   |      |                           |    |        |         |
|-------------------|------|---------------------------|----|--------|---------|
| 16461 IPI00027107 | 74,3 | 74,3 TIGTGLVTNTLA(M)TEEEK | 18 | 962,48 | 1922,95 |
| 5748 IPI00026154  | 33,9 | 33,9 ESLQQ(M)AEVTR        | 11 | 654,32 | 1306,62 |
| 9756 IPI00026154  | 84,5 | 84,5 AQEQELAADAFK         | 13 | 724,85 | 1447,69 |
| 14344 IPI00103994 | 41,3 | 41,3 TGFFEFQAAK           | 10 | 573,28 | 1144,55 |
| 17844 IPI00103994 | 88,2 | 88,2 STGNFLTTLTQAIDK      | 14 | 754,90 | 1507,79 |
| 15516 IPI00103994 | 41,3 | 41,3 GTGVVTSVPSDSPDDIAALR | 20 | 979,00 | 1955,98 |
| 21930 IPI00014177 | 58,7 | 58,7 TIISYIDEQFER         | 12 | 757,38 | 1512,75 |
| 13110 IPI00014177 | 67,7 | 67,7 LTVVDTPGYGDAINCR     | 16 | 875,93 | 1749,84 |
| 11670 IPI00221092 | 43,1 | 43,1 DILIQYDR             | 8  | 518,28 | 1034,54 |
| 19720 IPI00221092 | 57,2 | 57,2 LLEPVLLL GK          | 10 | 547,86 | 1093,71 |
| 12895 IPI00221092 | 49,6 | 49,6 GPLQSVQVFGR          | 11 | 594,33 | 1186,65 |
| 5511 IPI00221088  | 55,9 | 55,9 IGVLDEGK             | 8  | 415,73 | 829,45  |
| 10141 IPI00221088 | 45,1 | 45,1 IEDFLER              | 7  | 461,24 | 920,46  |
| 15174 IPI00221088 | 59,6 | 59,6 LDYILGLK             | 8  | 467,78 | 933,55  |
| 12550 IPI00221088 | 75,5 | 75,5 LFEGNALLR            | 9  | 516,80 | 1031,58 |
| 18297 IPI00221088 | 33,8 | 33,8 QVVNIPSFIVR          | 11 | 636,38 | 1270,74 |
| 4640 IPI00217236  | 60,7 | 60,7 QAEILQESR            | 9  | 537,28 | 1072,55 |
| 10111 IPI00217236 | 39,3 | 39,3 RLEAAYLDLQR          | 11 | 449,92 | 1346,73 |
| 5068 IPI00022793  | 35,3 | 35,3 DL(M)PHDLAR          | 9  | 542,27 | 1082,52 |
| 6867 IPI00022793  | 62,4 | 62,4 LEQDEYALR            | 9  | 568,78 | 1135,55 |
| 12555 IPI00022793 | 43,1 | 43,1 TPFLLSGTSYK          | 11 | 607,33 | 1212,64 |
| 21040 IPI00022793 | 64,6 | 64,6 AQDEGLLSDVVPFK       | 14 | 759,40 | 1516,78 |
| 16486 IPI00329633 | 68,8 | 68,8 IYGISFPDPK           | 10 | 568,80 | 1135,59 |
| 16581 IPI00329633 | 49,3 | 49,3 F(M)ADIDLDPGCTLNK    | 15 | 863,39 | 1724,78 |
| 20037 IPI00220503 | 85,2 | 85,2 LLGPDAAINLTDPDGALAK  | 19 | 933,00 | 1863,99 |
| 5996 IPI00025491  | 42,9 | 42,9 KVDWLTEK             | 8  | 509,78 | 1017,55 |
| 10281 IPI00025491 | 39,7 | 39,7 QFYINVER             | 8  | 534,78 | 1067,54 |
| 17552 IPI00025491 | 50,3 | 50,3 DQIYDIFQK            | 9  | 585,30 | 1168,58 |
| 7965 IPI00025491  | 54,4 | 54,4 KEELTLEGIR           | 10 | 594,34 | 1186,66 |
| 8631 IPI00025491  | 49,7 | 49,7 LQ(M)EAPHIIVGTPGR    | 15 | 545,63 | 1633,86 |
| 8629 IPI00299573  | 37,4 | 37,4 VVNPLFEK             | 8  | 473,27 | 944,53  |
| 6011 IPI00299573  | 33,8 | 33,8 KVVNPLFEK            | 9  | 537,32 | 1072,63 |

|                   |      |                               |    |         |         |
|-------------------|------|-------------------------------|----|---------|---------|
| 18175 IPI00299573 | 54   | 54 VPPAINQFTQALDR             | 14 | 785,42  | 1568,83 |
| 7587 IPI00017448  | 51,4 | 51,4 TYAICGAIR                | 9  | 512,77  | 1023,52 |
| 5356 IPI00017448  | 81,8 | 81,8 (M)GESDDSilR             | 10 | 569,76  | 1137,50 |
| 12885 IPI00642816 | 80,9 | 80,9 PQYQTWEEFSR              | 11 | 735,84  | 1469,66 |
| 10800 IPI00398135 | 55,5 | 55,5 TGAAPIIDVVR              | 11 | 556,33  | 1110,64 |
| 9889 IPI00398135  | 79   | 79 NQSF CPTVNLDK              | 12 | 711,84  | 1421,66 |
| 7782 IPI00011454  | 47   | 47 GLLEFEHQ R                 | 9  | 564,79  | 1127,57 |
| 14596 IPI00011454 | 40,5 | 40,5 VPDVLVADPPIAR            | 13 | 681,39  | 1360,77 |
| 26318 IPI00011454 | 35,2 | 35,2 ALLDSLQLGPDSLTVH LIHEVTK | 23 | 625,60  | 2498,37 |
| 17602 IPI00220362 | 37,1 | 37,1 DYFLFR                   | 6  | 430,72  | 859,42  |
| 16644 IPI00220362 | 40,7 | 40,7 FLPLFDR                  | 7  | 454,26  | 906,50  |
| 4941 IPI00220362  | 61,6 | 61,6 GGEIQPVSVK               | 10 | 507,28  | 1012,56 |
| 13598 IPI00012750 | 71,4 | 71,4 LNNLVLFDK                | 9  | 538,31  | 1074,61 |
| 13030 IPI00005719 | 82,3 | 82,3 LLLIGDSGVGK              | 11 | 536,32  | 1070,63 |
| 25083 IPI00005719 | 67,2 | 67,2 EFADSLGIPFLETS AK        | 16 | 862,94  | 1723,87 |
| 14285 IPI00032140 | 62,5 | 62,5 DEEVHAGLGELLR            | 13 | 479,92  | 1436,73 |
| 19597 IPI00032140 | 39,6 | 39,6 LYG PSSVSFADDFVR         | 15 | 830,40  | 1658,79 |
| 33006 IPI00032140 | 53   | 53 DQAVENILVSPVVVASSLGLVSLGGK | 26 | 851,15  | 2550,42 |
| 7605 IPI00221089  | 35   | 35 GLSQSALPYR                 | 10 | 546,30  | 1090,58 |
| 16124 IPI00221089 | 55,2 | 55,2 GLTPSQIGVILR             | 12 | 627,38  | 1252,75 |
| 23713 IPI00221089 | 30,8 | 30,8 GLAPDLPEDLYHLIK          | 15 | 847,46  | 1692,91 |
| 14215 IPI00179589 | 71,5 | 71,5 GPDGLTAFEATDNQAIK        | 17 | 874,43  | 1746,84 |
| 12490 IPI00396370 | 34,6 | 34,6 NLFNVVDCK                | 9  | 554,78  | 1107,54 |
| 17797 IPI00396370 | 83,8 | 83,8 GTQGVVTNFEIFR            | 13 | 734,38  | 1466,75 |
| 16887 IPI00030706 | 32   | 32 ETFLTSPEEL YR              | 12 | 742,87  | 1483,72 |
| 8646 IPI00015148  | 32,9 | 32,9 YDPTIEDSYR               | 10 | 629,78  | 1257,55 |
| 26638 IPI00015148 | 90,4 | 90,4 INVNEIFYDLVR             | 12 | 747,90  | 1493,79 |
| 20300 IPI00031691 | 59,3 | 59,3 DFNHINVELSLLGK           | 14 | 533,62  | 1597,85 |
| 20750 IPI00031691 | 38,1 | 38,1 TILSNQTVDIPENV DITLK     | 19 | 1057,07 | 2112,13 |
| 19907 IPI00029601 | 68,2 | 68,2 YGLFPANYVELR             | 12 | 721,38  | 1440,74 |
| 14125 IPI00033025 | 41,9 | 41,9 VNIPLIAK                 | 9  | 490,83  | 979,64  |
| 8341 IPI00033025  | 81,3 | 81,3 ADTLTPEECQQFK            | 13 | 783,86  | 1565,70 |

|                   |      |                                   |    |         |         |
|-------------------|------|-----------------------------------|----|---------|---------|
| 20482 IPI00033025 | 50,2 | 50,2 NLEGYVGFANLPNQVYR            | 17 | 977,49  | 1952,97 |
| 13743 IPI00005614 | 99,8 | 99,8 AQTLPTSVVTITSESSPGK          | 19 | 952,00  | 1901,99 |
| 21763 IPI00005614 | 76,9 | 76,9 HQILEQAVEDYAETVHQLSK         | 20 | 780,06  | 2337,16 |
| 12200 IPI00017334 | 41,8 | 41,8 IFTSIGEDYDER                 | 12 | 722,83  | 1443,65 |
| 6597 IPI00419880  | 60,1 | 60,1 TTDGYLLR                     | 8  | 469,75  | 937,49  |
| 11850 IPI00419880 | 33,1 | 33,1 LFCVGFTK                     | 8  | 486,25  | 970,49  |
| 14756 IPI00419880 | 78,5 | 78,5 ACQSIYPLHDFVFR               | 14 | 568,96  | 1703,85 |
| 6877 IPI00216682  | 42,2 | 42,2 GPSYGLSAEVK                  | 11 | 554,29  | 1106,56 |
| 20920 IPI00216682 | 77   | 77 DGIILCELINK                    | 11 | 644,35  | 1286,69 |
| 6073 IPI00216682  | 86,7 | 86,7 AGQSVIGLQ(M)GTNK             | 14 | 710,37  | 1418,72 |
| 17217 IPI00220709 | 74,7 | 74,7 TIDDLEETLASAK                | 13 | 703,36  | 1404,70 |
| 10847 IPI00017855 | 29,6 | 29,6 IVYGHLLDDPASQEIER            | 16 | 614,64  | 1840,89 |
| 9951 IPI00299000  | 41,9 | 41,9 EGEFVAQFK                    | 9  | 527,76  | 1053,51 |
| 4896 IPI00299000  | 84,5 | 84,5 SE(M)EVQDAELK                | 11 | 647,79  | 1293,57 |
| 13255 IPI00299000 | 32,7 | 32,7 ITSGPFEPDLYK                 | 12 | 683,85  | 1365,68 |
| 18705 IPI00215777 | 48,1 | 48,1 FGFYEVFK                     | 8  | 518,76  | 1035,51 |
| 7207 IPI00215777  | 30,2 | 30,2 LPRPPPPE(M)PESLK             | 14 | 535,29  | 1602,84 |
| 26868 IPI00215777 | 63,7 | 63,7 YYALCGFGGVLSCGLTHTAVVPLDLVK  | 27 | 970,83  | 2909,48 |
| 22933 IPI00221232 | 73,6 | 73,6 SDPLLIPIPTSENPFK             | 16 | 864,46  | 1726,91 |
| 7082 IPI00335132  | 67   | 67 GEHPGLSIGDVAK                  | 13 | 640,34  | 1278,66 |
| 7290 IPI00335132  | 55,8 | 55,8 KHPDASVNFSEFSK               | 14 | 531,59  | 1591,76 |
| 16239 IPI00008524 | 59,6 | 59,6 GFGFVSFER                    | 9  | 523,26  | 1044,50 |
| 15831 IPI00008524 | 77,6 | 77,6 SLGYAYVNFQQPADAER            | 17 | 964,96  | 1927,91 |
| 24870 IPI00008524 | 44,5 | 44,5 ITG(M)LLEIDNSELLH(M)LESPELRL | 24 | 924,80  | 2771,37 |
| 15514 IPI00003918 | 29,7 | 29,7 APIRPDIVNFVHTNLR             | 16 | 466,27  | 1861,03 |
| 14766 IPI00465315 | 62,7 | 62,7 ADLIAYLK                     | 8  | 453,77  | 905,52  |
| 25440 IPI00465315 | 53,2 | 53,2 GIIWGEDTL(M)EYLENPK          | 17 | 1012,49 | 2022,96 |
| 19650 IPI00215637 | 43,3 | 43,3 VGNLGLATSFFNER               | 14 | 762,89  | 1523,77 |
| 21285 IPI00215637 | 84,2 | 84,2 HVINFDLPSDIEEYVHR            | 17 | 695,01  | 2082,02 |
| 5581 IPI00000494  | 47,3 | 47,3 FPGYDSESK                    | 9  | 515,23  | 1028,44 |
| 4660 IPI00000494  | 68   | 68 HI(M)GQNVADY(M)R               | 12 | 733,83  | 1465,64 |
| 4916 IPI00306960  | 31,1 | 31,1 DHFFDR                       | 6  | 418,69  | 835,36  |



|                   |      |                                      |    |         |         |
|-------------------|------|--------------------------------------|----|---------|---------|
| 8175 IPI00306960  | 29,9 | 29,9 DVCLYPR                         | 7  | 461,73  | 921,44  |
| 7918 IPI00306960  | 91,5 | 91,5 YGTCPHGGYGLGLER                 | 15 | 546,26  | 1635,75 |
| 15416 IPI00008494 | 66,6 | 66,6 LLGIETPLPK                      | 10 | 540,84  | 1079,66 |
| 10972 IPI00008494 | 29,8 | 29,8 DLEGTYLCR                       | 9  | 563,76  | 1125,51 |
| 18460 IPI00008494 | 51   | 51 VELAPLPSWQPVGK                    | 14 | 760,93  | 1519,84 |
| 20545 IPI00008494 | 54,4 | 54,4 DGTFPLPIGESVTVTR                | 16 | 844,95  | 1687,88 |
| 12790 IPI00027834 | 57   | 57 ASL(N)GADIYSGCCTLK                | 16 | 865,89  | 1729,76 |
| 37474 IPI00027834 | 43,6 | 43,6 GLIDGVVEADLVEALQEFGPISYVVV(M)PK | 29 | 1035,21 | 3102,61 |
| 8974 IPI00021266  | 40,6 | 40,6 LYDIDVAK                        | 8  | 468,76  | 935,50  |
| 6404 IPI00021266  | 51,7 | 51,7 FPLTTESA(M)K                    | 10 | 570,78  | 1139,55 |
| 12733 IPI00021266 | 36   | 36 LAPDYDALDVANK                     | 13 | 702,85  | 1403,69 |
| 8501 IPI00026665  | 35,5 | 35,5 HTGYVIELQHVVK                   | 13 | 508,28  | 1521,83 |
| 31123 IPI00026665 | 63,9 | 63,9 ECGVGIVTPEQIEEAVEAINR           | 23 | 828,42  | 2482,23 |
| 4695 IPI00011200  | 41,8 | 41,8 F(M)GTEL(N)GK                   | 9  | 507,23  | 1012,45 |
| 10116 IPI00011200 | 36,3 | 36,3 ILQDGGGLQVVEK                   | 12 | 649,87  | 1297,72 |
| 13050 IPI00298994 | 32,6 | 32,6 NLGTALAE LR                     | 10 | 529,30  | 1056,59 |
| 13880 IPI00298994 | 35,4 | 35,4 V(M)VTNVTSLLK                   | 11 | 610,85  | 1219,68 |
| 29073 IPI00298994 | 48,8 | 48,8 GVGAAATAVTQALNELLQHVK           | 21 | 697,72  | 2090,15 |
| 18557 IPI00298994 | 33,8 | 33,8 LLAALLEDEGGSGRPLLQAAK           | 21 | 708,07  | 2121,18 |
| 9801 IPI00465260  | 44,3 | 44,3 TVNVVQFEP SK                    | 11 | 624,33  | 1246,66 |
| 25113 IPI00465260 | 67,6 | 67,6 TFFSFPVAVVAPFK                  | 13 | 729,40  | 1456,78 |
| 25758 IPI00465260 | 35,8 | 35,8 TLYVEEVVVPNVIEPSFGLGR           | 20 | 1109,59 | 2217,17 |
| 5463 IPI00419373  | 54,1 | 54,1 EDTEEYNLR                       | 9  | 584,76  | 1167,50 |
| 7122 IPI00419373  | 45,5 | 45,5 IETIEV(M)EDR                    | 10 | 625,80  | 1249,59 |
| 12188 IPI00419373 | 44,6 | 44,6 WGTLTDCVV(M)R                   | 11 | 677,32  | 1352,62 |
| 17034 IPI00419373 | 33,6 | 33,6 GFAFVTFDDHDTV DK                | 15 | 857,39  | 1712,77 |
| 10707 IPI00376798 | 57,3 | 57,3 YDGILPGK                        | 9  | 488,28  | 974,54  |
| 15386 IPI00376798 | 59,3 | 59,3 VLEQLTGQTPVFSK                  | 14 | 773,93  | 1545,84 |
| 18840 IPI00029750 | 90,8 | 90,8 TTGFG(M)IYDSL DYAK              | 15 | 849,39  | 1696,77 |
| 27533 IPI00411301 | 96   | 96 SIVEEIEDLVAR                      | 12 | 686,87  | 1371,72 |
| 20257 IPI00216694 | 55,6 | 55,6 YPALTKPENQDIDWTLLEGETR          | 22 | 863,77  | 2588,28 |
| 11880 IPI00216694 | 60,6 | 60,6 EGICALGGTSELSSEG TQHSYSEEEK     | 26 | 929,07  | 2784,20 |

|       |             |      |      |                        |    |        |         |
|-------|-------------|------|------|------------------------|----|--------|---------|
| 24810 | IPI00007402 | 78,7 | 78,7 | ENIVEAIIHSPELIR        | 15 | 578,32 | 1731,95 |
| 4215  | IPI00031801 | 48   | 48   | IQAGEIGE(M)K           | 10 | 546,27 | 1090,53 |
| 6950  | IPI00031801 | 93,9 | 93,9 | EDVFNHQTAK             | 11 | 643,84 | 1285,67 |
| 6409  | IPI00449049 | 33,4 | 33,4 | AEPVEVVAPR             | 10 | 533,80 | 1065,58 |
| 18222 | IPI00449049 | 61,3 | 61,3 | TTNFAGILSQGLR          | 13 | 689,38 | 1376,74 |
| 17022 | IPI00449049 | 81   | 81   | VVSEDFLQDVSASTK        | 15 | 812,91 | 1623,80 |
| 29775 | IPI00168184 | 65,4 | 65,4 | DNTIEHLLPLFLAQLK       | 16 | 622,36 | 1864,04 |
| 14644 | IPI00015029 | 62,2 | 62,2 | LTFSCGGSDNFK           | 13 | 723,34 | 1444,67 |
| 16749 | IPI00015029 | 61,2 | 61,2 | HLNEIDLFHCIDPNDSK      | 17 | 689,66 | 2065,95 |
| 11112 | IPI00420108 | 30,8 | 30,8 | GLVVPVIR               | 8  | 426,79 | 851,56  |
| 29370 | IPI00004358 | 32,6 | 32,6 | LQDFNVGDYIEAVLDR       | 16 | 622,98 | 1865,92 |
| 26088 | IPI00021347 | 61,4 | 61,4 | TDQVIQSLIALVNDPQPEHPLR | 22 | 828,45 | 2482,32 |
| 12623 | IPI00163187 | 49,3 | 49,3 | LVARPEPATGYTLEFR       | 16 | 607,33 | 1818,96 |
| 8085  | IPI00027252 | 45,9 | 45,9 | LGLDYEER               | 8  | 497,75 | 993,48  |
| 18620 | IPI00027252 | 40   | 40   | VLPSIVNEVLK            | 11 | 605,87 | 1209,73 |
| 26550 | IPI00027252 | 61,6 | 61,6 | IPWFQYPIIYDIR          | 13 | 862,46 | 1722,91 |
| 17812 | IPI00027252 | 38,2 | 38,2 | IGGVQQDTILAEGLHFR      | 17 | 618,67 | 1852,98 |
| 19937 | IPI00218993 | 39,8 | 39,8 | VLGTAFDPFLGGK          | 13 | 661,36 | 1320,71 |
| 9419  | IPI00021766 | 75,2 | 75,2 | GPLPAAPPVAPER          | 13 | 636,36 | 1270,70 |
| 12465 | IPI00443909 | 81,2 | 81,2 | INPDGSQSVVEVPYAR       | 16 | 865,94 | 1729,86 |
| 20820 | IPI00443909 | 43,8 | 43,8 | SEAHLTELLEEICDR        | 15 | 605,62 | 1813,85 |
| 13160 | IPI00550069 | 72,9 | 72,9 | VNPALAE LNLR           | 11 | 605,35 | 1208,69 |
| 11635 | IPI00550069 | 49   | 49   | ELCQGLGQPGSVLR         | 14 | 757,39 | 1512,77 |
| 17955 | IPI00550069 | 32,2 | 32,2 | SNELGDVGVHCVLQGLQTPSCK | 22 | 800,05 | 2397,14 |
| 24550 | IPI00016513 | 31,4 | 31,4 | AFLTAE DILR            | 11 | 631,36 | 1260,71 |
| 7905  | IPI00297579 | 33   | 33   | VEYFLK                 | 6  | 399,72 | 797,43  |
| 4600  | IPI00438229 | 58,4 | 58,4 | SGEGEVSGL(M)R          | 11 | 569,26 | 1136,51 |
| 13885 | IPI00438229 | 30,8 | 30,8 | ADVQSIIGLQR            | 11 | 600,34 | 1198,67 |
| 5331  | IPI00438229 | 33,1 | 33,1 | (M)IVDPVEPHGE(M)K      | 13 | 505,24 | 1512,69 |
| 19902 | IPI00438229 | 51,2 | 51,2 | LDLDTADSQPPVFK         | 15 | 829,94 | 1657,86 |
| 8956  | IPI00009904 | 58,8 | 58,8 | TFDSIV(M)DPK           | 10 | 584,78 | 1167,55 |
| 19662 | IPI00009904 | 75,4 | 75,4 | VEGFPTIYFAPSGDK        | 15 | 814,40 | 1626,79 |

|       |             |      |      |                                    |    |         |         |
|-------|-------------|------|------|------------------------------------|----|---------|---------|
| 23270 | IPI00009904 | 30,1 | 30,1 | EVSQPDWTPPPEVTLVLTk                | 19 | 1068,56 | 2135,11 |
| 23573 | IPI00013415 | 54,3 | 54,3 | AHIFVPVPQLK                        | 12 | 669,43  | 1336,85 |
| 26358 | IPI00013415 | 40,7 | 40,7 | TLTAVHDAILEDLVFPSEIVGK             | 22 | 789,76  | 2366,27 |
| 26133 | IPI00013415 | 29,6 | 29,6 | IVKP(N)GEKPDEFESGISQALLELE(M)NSDLK | 30 | 837,67  | 3346,65 |
| 26133 | IPI00013415 | 29,6 | 29,6 | IVKPNGEKPDEFESGIS(Q)ALLELE(M)NSDLK | 30 | 837,67  | 3346,65 |
| 7452  | IPI00021828 | 33,6 | 33,6 | FPVFK                              | 5  | 319,19  | 636,36  |
| 11165 | IPI00021828 | 52,7 | 52,7 | SQVVAGTNYFIK                       | 12 | 663,86  | 1325,70 |
| 9444  | IPI00021828 | 55,9 | 55,9 | VHVGDEDFVHLR                       | 12 | 474,91  | 1421,70 |
| 7447  | IPI00013297 | 64,9 | 64,9 | VTQLDLDGPK                         | 10 | 543,30  | 1084,58 |
| 5043  | IPI00019755 | 31,7 | 31,7 | LEEVLTK                            | 8  | 473,27  | 944,52  |
| 14235 | IPI00019755 | 53,7 | 53,7 | EDPTVSALLTSEK                      | 13 | 695,36  | 1388,70 |
| 18287 | IPI00002821 | 97,6 | 97,6 | LVAIVDVIDQNR                       | 12 | 677,89  | 1353,76 |
| 15656 | IPI00220766 | 50,8 | 50,8 | DFLLQQT(M)LR                       | 10 | 640,84  | 1279,66 |
| 28020 | IPI00220766 | 73,6 | 73,6 | GLAFIQDPDGYWIEILNPNK               | 20 | 1152,09 | 2302,16 |
| 18192 | IPI00015671 | 72,9 | 72,9 | SFGGGTGSFTSLL(M)ER                 | 17 | 860,40  | 1718,79 |
| 15196 | IPI00218342 | 72,4 | 72,4 | YVVVTGITPTPLGEGK                   | 16 | 815,96  | 1629,90 |
| 14564 | IPI00014263 | 50,6 | 50,6 | EALTYDGALLGDR                      | 13 | 697,35  | 1392,69 |
| 31498 | IPI00014263 | 46   | 46   | ELPTEPPYTAYVGNLPFNTVQGDIDAIFK      | 29 | 1070,54 | 3208,59 |
| 6212  | IPI00383751 | 33,6 | 33,6 | EPAVYFK                            | 7  | 427,23  | 852,44  |
| 21945 | IPI00021926 | 70,7 | 70,7 | ALQSVGQIVGEVLK                     | 14 | 720,92  | 1439,83 |
| 23515 | IPI00021926 | 38,2 | 38,2 | EVIELPLTNPELFQR                    | 15 | 899,49  | 1796,97 |
| 8541  | IPI00289499 | 43,1 | 43,1 | TGLVEFAR                           | 8  | 446,75  | 891,48  |
| 25008 | IPI00289499 | 47,2 | 47,2 | ALFEEVPELLTEAEK                    | 15 | 859,45  | 1716,88 |
| 12400 | IPI00465361 | 49,3 | 49,3 | LATQLTGVPMPVR                      | 13 | 691,89  | 1381,77 |
| 9594  | IPI00465361 | 40,7 | 40,7 | LATQLTGPV(M)PVR                    | 13 | 699,89  | 1397,77 |
| 11567 | IPI00470528 | 35,1 | 35,1 | YIQELWR                            | 7  | 504,27  | 1006,52 |
| 24913 | IPI00470528 | 60,4 | 60,4 | FFEVLIDPFHK                        | 12 | 502,28  | 1503,81 |
| 13830 | IPI00329745 | 41   | 41   | SSLLLGFR                           | 8  | 446,77  | 891,52  |
| 29080 | IPI00329745 | 66,2 | 66,2 | SEAA(N)GNLDFVLSFLK                 | 16 | 863,44  | 1724,86 |
| 11100 | IPI00442278 | 46   | 46   | FINEVLR                            | 7  | 445,76  | 889,50  |
| 12943 | IPI00216298 | 84,8 | 84,8 | TAFQEALDAAGDK                      | 13 | 668,82  | 1335,63 |
| 7015  | IPI00024175 | 34,9 | 34,9 | NIELAV(M)R                         | 8  | 481,26  | 960,51  |

|                   |      |                                    |    |         |         |
|-------------------|------|------------------------------------|----|---------|---------|
| 17474 IPI00024175 | 85,4 | 85,4 LTVEDPVTVEYITR                | 14 | 817,94  | 1633,86 |
| 24705 IPI00645078 | 64,3 | 64,3 SLVASLAEPDFVVTDFAK            | 18 | 955,00  | 1907,99 |
| 4825 IPI00013452  | 83,7 | 83,7 AYVDDTPAEQ(M)K                | 12 | 692,31  | 1382,60 |
| 24458 IPI00334159 | 89,6 | 89,6 LHLGIPEAVFVEDVDSF(M)K         | 19 | 721,37  | 2161,08 |
| 12330 IPI00031169 | 94,9 | 94,9 TASNVEEAFINTAK                | 14 | 747,88  | 1493,74 |
| 4253 IPI00026087  | 64   | 64 KDEDLFR                         | 7  | 461,74  | 921,46  |
| 20530 IPI00026087 | 36,6 | 36,6 DFVAEP(M)GEKPVGSLAGIGEVLGK    | 24 | 806,09  | 2415,24 |
| 18375 IPI00010105 | 43,9 | 43,9 ETEEILADV LK                  | 11 | 630,34  | 1258,67 |
| 10139 IPI00010105 | 73,9 | 73,9 HGLLVPNNTTDQELQHIR            | 18 | 695,70  | 2084,08 |
| 19657 IPI00026970 | 51,3 | 51,3 EELEFEVPFR                    | 10 | 647,82  | 1293,62 |
| 33451 IPI00026970 | 62,1 | 62,1 TL(M)VDPSQEVQENYNFLLQLQEELLK  | 26 | 1046,53 | 3136,56 |
| 28503 IPI00015361 | 64,2 | 64,2 NQLDQEVEFLSTSIAQLK            | 18 | 688,36  | 2062,06 |
| 21433 IPI00026302 | 76,5 | 76,5 LYTLVTYVPVTTFK                | 14 | 822,97  | 1643,92 |
| 25088 IPI00165393 | 91,2 | 91,2 SLDLFNCEITNLEDYR              | 16 | 1001,47 | 2000,92 |
| 25450 IPI00014850 | 87   | 87 DNLSYIEHIFEISR                  | 14 | 579,29  | 1734,86 |
| 20555 IPI00296022 | 50,6 | 50,6 SHTEEDCTEELFDLHAR             | 18 | 745,99  | 2234,96 |
| 20660 IPI00032460 | 90,6 | 90,6 YVQLPADEVDTQLLQDAAR           | 19 | 1073,05 | 2144,08 |
| 12848 IPI00297982 | 47,4 | 47,4 SCGSSTPDEFPTDIPGTK            | 18 | 948,42  | 1894,82 |
| 12583 IPI00003815 | 55,5 | 55,5 SIQEIQELDKDDESLR              | 16 | 639,98  | 1916,93 |
| 7332 IPI00029623  | 56,4 | 56,4 HITIFSPEGR                    | 10 | 578,81  | 1155,60 |
| 19762 IPI00478292 | 73,5 | 73,5 DLIQVQNLLK                    | 10 | 556,84  | 1111,66 |
| 17622 IPI00219330 | 86,1 | 86,1 VLAGETLSVNDPPDVLDR            | 18 | 955,50  | 1908,98 |
| 11570 IPI00005159 | 88,3 | 88,3 LCYVGYNIEQE QK                | 13 | 822,39  | 1642,77 |
| 14058 IPI00014238 | 87,7 | 87,7 LPETNLFETEETR                 | 13 | 789,89  | 1577,76 |
| 23478 IPI00027493 | 86,2 | 86,2 GQSEDPGSLLSLFR                | 14 | 753,38  | 1504,75 |
| 11252 IPI00221093 | 48,1 | 48,1 VCEEIAIIPSK                   | 11 | 629,84  | 1257,66 |
| 24313 IPI00221093 | 67   | 67 LLDFGSLSNLQVTQPTVG(M)NFK        | 22 | 809,09  | 2424,24 |
| 8080 IPI00009305  | 48,2 | 48,2 IIQFNPGPEK                    | 10 | 571,81  | 1141,61 |
| 21453 IPI00009305 | 49,1 | 49,1 YFTLGLPTGSTPLG CYK            | 17 | 937,97  | 1873,93 |
| 21185 IPI00642982 | 42,8 | 42,8 TENPLILIDEVDK                 | 13 | 749,90  | 1497,79 |
| 23748 IPI00642982 | 50,6 | 50,6 IVSGEAEVVEVTPENLQDFVGKPVFTVER | 29 | 1059,21 | 3174,61 |
| 20152 IPI00003348 | 84,8 | 84,8 ACGDSTLTQITAGLDPVGR           | 19 | 966,48  | 1930,94 |

|                   |      |                               |    |         |         |
|-------------------|------|-------------------------------|----|---------|---------|
| 24355 IPI00015842 | 86,3 | 86,3 EIVVLETLEDIDK            | 13 | 758,41  | 1514,81 |
| 19760 IPI00514053 | 35,6 | 35,6 LFTAESLIGLK              | 11 | 596,35  | 1190,69 |
| 24795 IPI00396435 | 83,4 | 83,4 TLATDIL(M)GVLK           | 12 | 645,87  | 1289,73 |
| 12493 IPI00026570 | 58   | 58 GGVADALLYR                 | 10 | 517,78  | 1033,55 |
| 20692 IPI00026570 | 45,3 | 45,3 LFQEDDEIPLYLK            | 13 | 811,92  | 1621,82 |
| 10321 IPI00017964 | 65,2 | 65,2 VAQLEQVYIR               | 10 | 609,85  | 1217,68 |
| 15954 IPI00328319 | 83,1 | 83,1 TPSSDVLVFDYTK            | 13 | 736,37  | 1470,72 |
| 26605 IPI00018873 | 36,6 | 36,6 GDLEEYQGDLHTVFK          | 16 | 621,98  | 1862,90 |
| 19640 IPI00018873 | 34,7 | 34,7 STQAPLIIRPDSGNPLDTVLK    | 21 | 745,75  | 2234,23 |
| 24708 IPI00298961 | 51,2 | 51,2 YYGLQILENVIK             | 12 | 726,91  | 1451,80 |
| 25815 IPI00009071 | 53,9 | 53,9 YGPIVDVYVPLDFYTR         | 16 | 958,99  | 1915,97 |
| 19592 IPI00024364 | 63,1 | 63,1 YSDIDIILLK               | 10 | 596,84  | 1191,68 |
| 23998 IPI00024364 | 38   | 38 ICEDSAEILDSVDLDRPLNI(M)IPK | 24 | 924,80  | 2771,38 |
| 24778 IPI00219029 | 46,7 | 46,7 IANDNSLNHEYLPILGLAEFR    | 21 | 800,42  | 2398,23 |
| 25085 IPI00009236 | 64,2 | 64,2 IDFEDVIAEPEGTHSFDGIWK    | 21 | 802,38  | 2404,12 |
| 12100 IPI00024157 | 39,5 | 39,5 DHLVTAYNHLEFETK          | 14 | 563,29  | 1686,84 |
| 7995 IPI00024157  | 39,9 | 39,9 FLQEHGSDSFLAEHK          | 15 | 582,28  | 1743,82 |
| 24245 IPI00008438 | 80,4 | 80,4 IAIYELLFK                | 9  | 555,33  | 1108,65 |
| 11617 IPI00793696 | 45,2 | 45,2 VFQFLNAK                 | 8  | 483,77  | 965,53  |
| 10947 IPI00793696 | 57,7 | 57,7 AITGASLADI(M)AK          | 13 | 639,34  | 1276,67 |
| 9159 IPI00221091  | 41,8 | 41,8 (M)NVLADALK              | 9  | 495,77  | 989,52  |
| 12838 IPI00221091 | 68,4 | 68,4 HGYIGEFEIIDDHR           | 14 | 567,61  | 1699,80 |
| 19567 IPI00105598 | 73,2 | 73,2 LYDNLLEQNLIR             | 12 | 752,41  | 1502,81 |
| 21568 IPI00060181 | 45,4 | 45,4 EFLIFR                   | 7  | 469,28  | 936,54  |
| 11622 IPI00011201 | 79,7 | 79,7 ALTSQLTDEELAQGR          | 15 | 816,42  | 1630,82 |
| 19425 IPI00002459 | 43,7 | 43,7 EAILDIITSR               | 10 | 565,82  | 1129,63 |
| 12855 IPI00297160 | 78,5 | 78,5 YGFIEGHVVIPR             | 12 | 462,92  | 1385,75 |
| 21620 IPI00016342 | 66,7 | 66,7 GADCCVLVFDVTAPNTFK       | 18 | 1007,47 | 2012,93 |
| 12210 IPI00026185 | 77,6 | 77,6 STLNEIYFGK               | 10 | 586,30  | 1170,59 |
| 23078 IPI00027497 | 67,6 | 67,6 TLAQLNPESLFIASK          | 17 | 916,51  | 1831,01 |
| 13495 IPI00004902 | 69   | 69 VDLVLLGK                   | 8  | 428,78  | 855,54  |
| 16907 IPI00004902 | 29,3 | 29,3 IEVIKPGDLGVDLTSK         | 16 | 561,99  | 1682,94 |

|       |             |      |      |                         |    |         |         |
|-------|-------------|------|------|-------------------------|----|---------|---------|
| 21840 | IPI00012102 | 77,2 | 77,2 | WQTLLSVDDLVEK           | 13 | 773,41  | 1544,81 |
| 10992 | IPI00299608 | 76,6 | 76,6 | TVGTPIASVPGSTNTGTVPGSEK | 23 | 1079,06 | 2156,10 |
| 20710 | IPI00375631 | 76,6 | 76,6 | VPLASQGLGPGSTVLLVVDK    | 20 | 975,57  | 1949,12 |
| 14160 | IPI00030702 | 76,6 | 76,6 | TPYTDVNIIVTIR           | 12 | 696,38  | 1390,74 |
| 5121  | IPI00219097 | 39,7 | 39,7 | SEHPGLSIGDTAK           | 13 | 437,89  | 1310,65 |
| 6870  | IPI00219097 | 61   | 61   | KHPDSSVNFAEFSK          | 14 | 531,59  | 1591,76 |
| 16041 | IPI00641582 | 75,9 | 75,9 | VQGLEQAVDNFEGK          | 14 | 767,38  | 1532,75 |
| 13615 | IPI00641950 | 58,1 | 58,1 | YWLCAATGPSIK            | 12 | 683,84  | 1365,67 |
| 4258  | IPI00178431 | 75,2 | 75,2 | S(M)ENYYQESGR           | 11 | 690,28  | 1378,55 |
| 16086 | IPI00009030 | 59,6 | 59,6 | IPLNDLFR                | 8  | 494,28  | 986,55  |
| 9141  | IPI00555956 | 74,8 | 74,8 | TQNP(M)VTGTSVLGVK       | 15 | 774,41  | 1546,80 |
| 4275  | IPI00555902 | 74,8 | 74,8 | HCLLTCEECK              | 10 | 675,29  | 1348,56 |
| 18685 | IPI00023640 | 62,8 | 62,8 | NSILAQVLDQSAR           | 13 | 707,89  | 1413,76 |
| 19635 | IPI00183603 | 74,7 | 74,7 | VPFLVLECPNLK            | 12 | 714,90  | 1427,78 |
| 13975 | IPI00021840 | 40,3 | 40,3 | DIPGLTDTTVPR            | 12 | 642,84  | 1283,67 |
| 9991  | IPI00005537 | 37,7 | 37,7 | LVESLPQEIK              | 10 | 578,33  | 1154,65 |
| 13155 | IPI00005537 | 45,7 | 45,7 | NYIQGINLVQAK            | 12 | 680,88  | 1359,75 |
| 6895  | IPI00017596 | 66,1 | 66,1 | LEHEYIQNFK              | 10 | 440,89  | 1319,65 |
| 33323 | IPI00012268 | 47,9 | 47,9 | AELATEEFLPVTPILEGFVILR  | 22 | 819,79  | 2456,35 |
| 4203  | IPI00175212 | 73,6 | 73,6 | LLADQAEAR               | 9  | 493,77  | 985,52  |
| 25358 | IPI00004656 | 73,4 | 73,4 | SNFLNCYVSGFHPSDIEVDLLK  | 22 | 852,08  | 2553,22 |
| 15126 | IPI00301936 | 51   | 51   | DANLYISGLPR             | 11 | 609,83  | 1217,64 |
| 27553 | IPI00219622 | 72,8 | 72,8 | YNEDLELEDAIHTAILTLK     | 19 | 734,38  | 2200,13 |
| 21628 | IPI00030243 | 48,7 | 48,7 | LLELDSFLK               | 9  | 539,31  | 1076,61 |
| 17377 | IPI00027285 | 65,4 | 65,4 | VLGLVLLR                | 8  | 441,81  | 881,61  |
| 30443 | IPI00020042 | 65,2 | 65,2 | ENAPAIIFIDEIDAIATK      | 18 | 648,68  | 1943,02 |
| 14816 | IPI00013891 | 71,6 | 71,6 | YGPLSGVNVVYDQR          | 14 | 783,90  | 1565,78 |
| 11277 | IPI00001734 | 44,4 | 44,4 | FGVIFAGAQK              | 10 | 519,29  | 1036,57 |
| 11998 | IPI00001734 | 40,1 | 40,1 | ELLAVPDNYK              | 10 | 581,31  | 1160,61 |
| 10266 | IPI00001734 | 29,5 | 29,5 | LPHSVLLEIQK             | 11 | 426,26  | 1275,76 |
| 28970 | IPI00012575 | 70,9 | 70,9 | NLDPFLLFDEFK            | 12 | 749,39  | 1496,76 |
| 10121 | IPI00789627 | 45,3 | 45,3 | WAAVVVPSGQEQR           | 13 | 713,87  | 1425,73 |

|                   |      |                                     |    |         |         |
|-------------------|------|-------------------------------------|----|---------|---------|
| 10770 IPI00789627 | 45,3 | 45,3 WAAVVVPSG(Q)EQR                | 13 | 714,37  | 1426,72 |
| 10770 IPI00789627 | 45,3 | 45,3 WAAVVVPSGQE(Q)R                | 13 | 714,37  | 1426,72 |
| 20953 IPI00306516 | 70,3 | 70,3 VTDLLGGLFSK                    | 11 | 575,33  | 1148,64 |
| 18635 IPI00299155 | 70,2 | 70,2 LLDEVFFSEK                     | 10 | 613,82  | 1225,62 |
| 24545 IPI00217143 | 70,1 | 70,1 AGLPCQDLEFVQFHPTGIYGAGCLITEGCR | 30 | 1122,86 | 3365,57 |
| 12765 IPI00026167 | 56,6 | 56,6 LLDLVQQSCNYK                   | 12 | 740,88  | 1479,74 |
| 13600 IPI00183695 | 52,6 | 52,6 EFPGFLENQK                     | 10 | 604,80  | 1207,59 |
| 18425 IPI00215901 | 55,5 | 55,5 LVSDE(M)VVELIEK                | 13 | 760,40  | 1518,79 |
| 19180 IPI00018398 | 48,2 | 48,2 VDILDPALLR                     | 10 | 562,84  | 1123,66 |
| 14346 IPI00793205 | 29,1 | 29,1 EKDLEDLFYK                     | 10 | 433,89  | 1298,64 |
| 7612 IPI00171199  | 56,8 | 56,8 IYIVHDEVK                      | 10 | 614,85  | 1227,69 |
| 14746 IPI00792538 | 67,5 | 67,5 EEAPDILCLQETK                  | 13 | 773,38  | 1544,74 |
| 21968 IPI00798400 | 67,5 | 67,5 EAVGDLLDAFK                    | 11 | 589,31  | 1176,60 |
| 16166 IPI00016910 | 41,8 | 41,8 FEELTNLIR                      | 9  | 567,81  | 1133,61 |
| 10827 IPI00007074 | 38   | 38 SEFVILR                          | 7  | 432,25  | 862,49  |
| 8220 IPI00007074  | 48,8 | 48,8 VDAQFGGIDQR                    | 11 | 603,30  | 1204,58 |
| 20172 IPI00220637 | 66,5 | 66,5 VLDLDFR                        | 8  | 495,78  | 989,55  |
| 10134 IPI00412579 | 38,8 | 38,8 FSVCVLGDQQHCDEAK               | 16 | 631,61  | 1891,82 |
| 12778 IPI00006052 | 49,8 | 49,8 IETLTQQLQAK                    | 12 | 693,40  | 1384,79 |
| 15804 IPI00006052 | 33,3 | 33,3 GAVSAEQVIAGFNR                 | 14 | 709,87  | 1417,73 |
| 20252 IPI00022830 | 63,9 | 63,9 SPNELVDDLK                     | 11 | 638,83  | 1275,64 |
| 12725 IPI00000051 | 63,6 | 63,6 LADIQIEQLNR                    | 11 | 656,87  | 1311,72 |
| 18290 IPI00011603 | 63,3 | 63,3 LQLDSPEDAEIFIVAK               | 15 | 837,93  | 1673,85 |
| 15916 IPI00290142 | 63,3 | 63,3 GLGLSPDLVCCR                   | 12 | 643,35  | 1284,69 |
| 4778 IPI00012795  | 50,6 | 50,6 SYSSGGEDGYVR                   | 12 | 638,78  | 1275,54 |
| 9219 IPI00012795  | 37,8 | 37,8 GHFGPINSVAFHPDGK               | 16 | 560,61  | 1678,82 |
| 28895 IPI00420014 | 37,2 | 37,2 DILCGAADEVLAFLK                | 15 | 793,93  | 1585,84 |
| 27458 IPI00420014 | 43,2 | 43,2 HLSDHLSERVEQTLSDLEQSK          | 21 | 602,80  | 2407,18 |
| 14434 IPI00170692 | 62,4 | 62,4 GPFTDVVTTNLK                   | 12 | 646,35  | 1290,68 |
| 11440 IPI00017344 | 62,2 | 62,2 LVLLGESAVGK                    | 11 | 543,33  | 1084,65 |
| 10570 IPI00465121 | 55,9 | 55,9 LLLLGAGESGK                    | 11 | 529,32  | 1056,62 |
| 14133 IPI00465121 | 30,2 | 30,2 IAQSDYIPTQQDVLR                | 15 | 873,95  | 1745,89 |

|                   |      |                                           |    |         |         |
|-------------------|------|-------------------------------------------|----|---------|---------|
| 25703 IPI00013122 | 61,4 | 61,4 LGPGGLDPVEVYESLPEELQK                | 21 | 1135,08 | 2268,15 |
| 16756 IPI00028006 | 61,4 | 61,4 (N)GIHDLDNISFPK                      | 13 | 735,86  | 1469,72 |
| 16594 IPI00219446 | 39,9 | 39,9 LYTLVLTDPDAPSR                       | 14 | 780,92  | 1559,82 |
| 19915 IPI00219446 | 37,8 | 37,8 WSGPLSLQEVDEQPQHPLHVTYAGAAVDELGK     | 32 | 868,69  | 3470,71 |
| 15184 IPI00216256 | 53,2 | 53,2 LYSILGTTLK                           | 10 | 554,83  | 1107,65 |
| 11250 IPI00216256 | 30,4 | 30,4 VFASLPQVER                           | 10 | 573,32  | 1144,62 |
| 20262 IPI00026216 | 50,2 | 50,2 DYFNVPYPLPK                          | 11 | 676,85  | 1351,68 |
| 21113 IPI00026216 | 31,6 | 31,6 VLGATLLPDLIQK                        | 13 | 690,93  | 1379,84 |
| 7943 IPI00300371  | 53,4 | 53,4 FGNICVVR                             | 8  | 482,76  | 963,50  |
| 23463 IPI00012772 | 47,5 | 47,5 AQLNIGNVLPVGT(M)PEGTIVCCLEEKPGDR     | 30 | 1095,21 | 3282,60 |
| 26825 IPI00015077 | 63   | 63 NICQFLVEIGLAK                          | 13 | 752,91  | 1503,81 |
| 18197 IPI00015077 | 30,2 | 30,2 FAC(N)GTVIEHPEYGEVIQLQGDQR           | 24 | 921,10  | 2760,28 |
| 19940 IPI00219156 | 40,1 | 40,1 VCTLAIDPGDSDIIR                      | 16 | 879,46  | 1756,90 |
| 9194 IPI00006181  | 60   | 60 IFHTVTTTDDPVIR                         | 14 | 538,95  | 1613,84 |
| 16709 IPI00010415 | 59,6 | 59,6 TNIVTASVDAINFHDK                     | 16 | 582,30  | 1743,88 |
| 18940 IPI00061525 | 58,9 | 58,9 ITLECLPQNVGFYK                       | 14 | 841,43  | 1680,85 |
| 18342 IPI00002520 | 58,6 | 58,6 TGLIDYNQLALTAR                       | 14 | 774,92  | 1547,83 |
| 14290 IPI00005648 | 57,9 | 57,9 ILDILGETCK                           | 10 | 581,31  | 1160,61 |
| 22588 IPI00025273 | 47,4 | 47,4 FGDPECQVILPLLK                       | 14 | 814,94  | 1627,86 |
| 33121 IPI00023234 | 45,4 | 45,4 LQADDFLQDYTLINILHSEDLGK              | 24 | 925,48  | 2773,41 |
| 19627 IPI00300074 | 51,6 | 51,6 DLLFQALGR                            | 9  | 516,80  | 1031,58 |
| 10329 IPI00003949 | 39,7 | 39,7 LLAEPVPGIK                           | 10 | 518,82  | 1035,63 |
| 10229 IPI00012442 | 56,5 | 56,5 HPDSHQLFIGNLPHEVDK                   | 18 | 521,51  | 2082,03 |
| 20882 IPI00005154 | 46,9 | 46,9 FDEISFVNFR                           | 11 | 672,83  | 1343,65 |
| 21570 IPI00005154 | 41,1 | 41,1 ADVIQATGDAICIFR                      | 15 | 825,42  | 1648,83 |
| 11460 IPI00003565 | 56,2 | 56,2 ASTNIQDTEGNTPLHLACDEER               | 22 | 824,37  | 2470,10 |
| 33308 IPI00000873 | 33,1 | 33,1 SLGNVIDPLDVIYGISLQGLHNQLLNSNLDPSEVEK | 36 | 976,76  | 3903,02 |
| 18882 IPI00059366 | 55,8 | 55,8 GVTIASGGVLPNIHPELLAK                 | 20 | 662,72  | 1985,13 |
| 23935 IPI00022314 | 55   | 55 AIWNVINWENVTER                         | 14 | 872,44  | 1742,87 |
| 8135 IPI00020194  | 42,9 | 42,9 GEATVSFDDPPSAK                       | 14 | 710,83  | 1419,65 |
| 32496 IPI00216184 | 37,6 | 37,6 GDIPDLSQAPSSLLDALEQHLASLEGK          | 27 | 935,48  | 2803,41 |
| 19377 IPI00037448 | 54,1 | 54,1 IAAAGLDVTSPEPLPTNHPLLTLK             | 24 | 823,46  | 2467,37 |



|       |             |      |      |                                |    |         |         |
|-------|-------------|------|------|--------------------------------|----|---------|---------|
| 13220 | IPI00000861 | 53,7 | 53,7 | GFSVVADTPELQR                  | 13 | 709,87  | 1417,72 |
| 10787 | IPI00029264 | 36,6 | 36,6 | DVCTFLR                        | 7  | 455,73  | 909,44  |
| 25245 | IPI00029264 | 43   | 43   | HGGEDYVFSLLTGYCEPPTGVSLR       | 24 | 885,42  | 2653,25 |
| 28573 | IPI00550364 | 55,8 | 55,8 | ELNELVSAIEEHFFQPQK             | 18 | 720,03  | 2157,08 |
| 24765 | IPI00017726 | 32,3 | 32,3 | V(M)TIAPGLFGTPLLTSLPEK         | 20 | 1051,08 | 2100,15 |
| 32131 | IPI00017726 | 38,6 | 38,6 | LGDPAEYAHLVQAIENPFL(N)GEVIR    | 26 | 960,50  | 2878,48 |
| 15019 | IPI00008575 | 53,4 | 53,4 | KDDEENYLDLFSHK                 | 14 | 584,94  | 1751,80 |
| 24580 | IPI00303207 | 43,5 | 43,5 | EGINIFLDGYVPTENLR              | 17 | 975,50  | 1948,99 |
| 10987 | IPI00013877 | 37,1 | 37,1 | STGEAFVQFASK                   | 12 | 636,32  | 1270,62 |
| 25378 | IPI00013877 | 47,3 | 47,3 | ATENDIANFFSPLNPIR              | 17 | 959,99  | 1917,96 |
| 6737  | IPI00386755 | 52,7 | 52,7 | I(M)DCVGCfk                    | 9  | 573,24  | 1144,47 |
| 18930 | IPI00019385 | 52,6 | 52,6 | FFDEESYLLR                     | 11 | 703,34  | 1404,66 |
| 16609 | IPI00295851 | 52,1 | 52,1 | YEAAGTLVTLSSAPTAIK             | 18 | 896,99  | 1791,96 |
| 23225 | IPI00000495 | 52,1 | 52,1 | DPNAFLFDHLLTLKPVK              | 17 | 656,70  | 1967,09 |
| 25670 | IPI00007755 | 52,1 | 52,1 | GIEELFLDLCK                    | 11 | 668,84  | 1335,67 |
| 26728 | IPI00000684 | 52   | 52   | FVFDIFQFAK                     | 10 | 631,33  | 1260,65 |
| 19887 | IPI00031556 | 51,8 | 51,8 | NFAFLEFR                       | 8  | 522,27  | 1042,52 |
| 33924 | IPI00024466 | 51,5 | 51,5 | ILFLDVLFPLVVDK                 | 14 | 815,99  | 1629,97 |
| 6379  | IPI00010676 | 51,3 | 51,3 | SGCNHPDLDVQYR                  | 13 | 520,90  | 1559,68 |
| 7160  | IPI00398983 | 50,7 | 50,7 | YQAVTATLEEK                    | 11 | 626,82  | 1251,63 |
| 18642 | IPI00297084 | 50,6 | 50,6 | TLVLLDNLNVR                    | 11 | 635,38  | 1268,74 |
| 10236 | IPI00023919 | 29,8 | 29,8 | GVLlyGPPGTGK                   | 12 | 579,83  | 1157,64 |
| 18405 | IPI00023919 | 37,8 | 37,8 | IDILDSALLRPGR                  | 13 | 480,28  | 1437,83 |
| 22893 | IPI00029737 | 35,3 | 35,3 | LSPEPWPETGLVTDAFK              | 18 | 994,50  | 1986,99 |
| 23305 | IPI00029737 | 41,5 | 41,5 | WFCTGDIGEFHPDGCLQIIDR          | 21 | 846,05  | 2535,13 |
| 13770 | IPI00015018 | 50,2 | 50,2 | DKDFAIDIk                      | 10 | 589,33  | 1176,64 |
| 29663 | IPI00064328 | 53,6 | 53,6 | ADIIVSELLGSFADNELSPECLDGAQHFLK | 30 | 1096,87 | 3287,60 |
| 6672  | IPI00011302 | 49,1 | 49,1 | FEHCNFNDVTTR                   | 12 | 513,89  | 1538,66 |
| 21660 | IPI00010810 | 44,2 | 44,2 | LEVAPISDIIAIK                  | 13 | 691,42  | 1380,82 |
| 6036  | IPI00010271 | 48,9 | 48,9 | HHCpNTPiILVGTK                 | 14 | 529,62  | 1585,84 |
| 7100  | IPI00025091 | 41,5 | 41,5 | EAIEGTYIDK                     | 10 | 569,78  | 1137,55 |
| 6725  | IPI00025091 | 34   | 34   | N(M)SVHLSPCFR                  | 11 | 455,21  | 1362,62 |

|                   |      |                                        |    |         |         |
|-------------------|------|----------------------------------------|----|---------|---------|
| 19202 IPI00306301 | 48,3 | 48,3 GFCHLCDGQEACCVGLEAGINPTDHLITAYR   | 31 | 884,40  | 3533,56 |
| 7232 IPI00063130  | 48,3 | 48,3 GLGGEVPGSHQGPDPYR                 | 17 | 574,94  | 1721,81 |
| 17642 IPI00059292 | 48   | 48 FGHEFLEFEFRPDGK                     | 15 | 464,48  | 1853,87 |
| 5543 IPI00005161  | 36,6 | 36,6 VF(M)QEFK                         | 7  | 472,73  | 943,45  |
| 8706 IPI00005161  | 35,4 | 35,4 YFQFQEEGK                         | 9  | 588,27  | 1174,53 |
| 27485 IPI00103525 | 37,4 | 37,4 NLSPVVSNELLEQAFSQFGPVEK           | 23 | 844,77  | 2531,29 |
| 8461 IPI00216008  | 38,6 | 38,6 VGFQYEGTYK                        | 10 | 596,29  | 1190,56 |
| 17624 IPI00218493 | 47,2 | 47,2 SVGYKPDFVGFEPDK                   | 16 | 599,97  | 1796,90 |
| 5641 IPI00021187  | 29   | 29 KTEVL(M)ENFR                        | 10 | 428,22  | 1281,64 |
| 20915 IPI00021187 | 36,9 | 36,9 YSVQLLTPANLLAK                    | 14 | 765,95  | 1529,88 |
| 4798 IPI00185374  | 47,2 | 47,2 FFQEENTEK                         | 9  | 586,27  | 1170,52 |
| 7150 IPI00375704  | 47,1 | 47,1 RGPGLYYVDSEGNR                    | 14 | 528,26  | 1581,75 |
| 12630 IPI00291922 | 47,1 | 47,1 GPQLFH(M)DPSGTFVQCDAR             | 19 | 726,99  | 2177,96 |
| 6860 IPI00295741  | 47   | 47 ICEPGYSPTYK                         | 11 | 657,81  | 1313,60 |
| 20192 IPI00029468 | 41,2 | 41,2 DQLQTFSEEHPVLLTEAPLNPR            | 22 | 845,43  | 2533,28 |
| 5076 IPI00030304  | 46,6 | 46,6 LWDTAGQER                         | 9  | 538,26  | 1074,51 |
| 13170 IPI00305383 | 46,1 | 46,1 NALANPLYCPDYR                     | 13 | 783,87  | 1565,73 |
| 13398 IPI00219229 | 46   | 46 GDGVVLVAPPLR                        | 12 | 596,86  | 1191,70 |
| 31063 IPI00031030 | 44,1 | 44,1 VPYVAQEIQEEIDELLQEQR              | 20 | 810,41  | 2428,21 |
| 21700 IPI00306369 | 45,4 | 45,4 SEGALELADVSNELPGLK                | 18 | 921,48  | 1840,94 |
| 28980 IPI00024320 | 45,3 | 45,3 LFVGGGLNFNTDEQALEDHFSSFGPISEVVVVK | 32 | 1165,59 | 3493,74 |
| 20460 IPI00031522 | 31   | 31 (M)GLVDQLVEPLGPGLKPPEER             | 21 | 764,08  | 2289,20 |
| 4951 IPI00031045  | 31   | 31 HFVG(M)LPEK                         | 9  | 537,28  | 1072,54 |
| 14734 IPI00643368 | 44,9 | 44,9 HFCPNVPIILVGNK                    | 14 | 536,63  | 1606,86 |
| 16554 IPI00746777 | 32,9 | 32,9 VDEFVTHNLSFDEINK                  | 16 | 636,31  | 1905,91 |
| 27390 IPI00029079 | 44,8 | 44,8 ELFVQSEIFPLETPAFAIK               | 19 | 1090,09 | 2178,16 |
| 15844 IPI00006482 | 34,3 | 34,3 AVFQANQENLPILK                    | 14 | 792,94  | 1583,87 |
| 30318 IPI00006482 | 32,6 | 32,6 EQPLDEELKDAFQNAYLELGGLGER         | 25 | 945,47  | 2833,38 |
| 2775 IPI00006579  | 44,3 | 44,3 ESFAE(M)NR                        | 8  | 500,21  | 998,41  |
| 4208 IPI00218200  | 43,7 | 43,7 LQAAVDGP(M)DK                     | 11 | 580,78  | 1159,55 |
| 9689 IPI00247583  | 43,7 | 43,7 VYNVTQHAVGIVVVK                   | 15 | 547,64  | 1639,90 |
| 26453 IPI00022143 | 36,3 | 36,3 LLVPLVPDLQDVAQLR                  | 16 | 597,02  | 1788,05 |

|                   |      |                                        |    |         |         |
|-------------------|------|----------------------------------------|----|---------|---------|
| 13965 IPI00456887 | 42,8 | 42,8 DLLVQQASQCLSK                     | 13 | 745,39  | 1488,76 |
| 6992 IPI00759644  | 42,4 | 42,4 GVQVETISPGDGR                     | 13 | 657,84  | 1313,66 |
| 27385 IPI00456969 | 34,7 | 34,7 LVPLLEDGGEAPAALAALEEK             | 23 | 783,43  | 2347,25 |
| 37454 IPI00456969 | 37,5 | 37,5 VFYEEELDVPVLVLFNEVLHDVLR          | 23 | 929,82  | 2786,44 |
| 19875 IPI00022442 | 42,2 | 42,2 L(M)CPQEIVDYIADK                  | 14 | 855,91  | 1709,80 |
| 25250 IPI00015262 | 30,8 | 30,8 TWIEGLTGLSIGPDFQK                 | 17 | 931,49  | 1860,96 |
| 25895 IPI00008998 | 39,6 | 39,6 VELSDVQNPASITENVLHFK              | 21 | 785,08  | 2352,23 |
| 13900 IPI00025874 | 37,1 | 37,1 NIEIDSPYEISR                      | 12 | 718,36  | 1434,70 |
| 19755 IPI00028004 | 41,4 | 41,4 FGPYYTEPVIAGLDPK                  | 16 | 883,95  | 1765,89 |
| 26303 IPI00024664 | 41,6 | 41,6 IGEWELIQESGVPLKPLFGPGYTGIR        | 26 | 952,85  | 2855,53 |
| 8276 IPI00141318  | 32,8 | 32,8 VQEQVHTLLSQDQAQAAR                | 18 | 674,68  | 2021,03 |
| 10907 IPI00019599 | 41   | 41 YPEAPPFVR                           | 9  | 538,28  | 1074,55 |
| 12198 IPI00219155 | 40,5 | 40,5 YSVDIPLDK                         | 9  | 525,28  | 1048,54 |
| 6319 IPI00328350  | 40,5 | 40,5 HGYFCFHEAADQK                     | 13 | 537,23  | 1608,68 |
| 32611 IPI00234368 | 30,4 | 30,4 ENILFG(M)GNPLLDISAVVDKDFLDK       | 25 | 927,14  | 2778,41 |
| 25710 IPI00008552 | 36,2 | 36,2 YEISSVPTFLFFK                     | 13 | 789,42  | 1576,82 |
| 13420 IPI00375441 | 39,5 | 39,5 IGGNEGIDVPIPR                     | 13 | 668,86  | 1335,72 |
| 26880 IPI00470525 | 29,9 | 29,9 WLLLCNPGLAELIAEK                  | 16 | 920,51  | 1839,00 |
| 12875 IPI00031651 | 39,2 | 39,2 GEAVLRPGLDAEPELSPEEQR             | 21 | 764,72  | 2291,14 |
| 14646 IPI00010182 | 39,5 | 39,5 WDAWNELK                          | 8  | 531,26  | 1060,50 |
| 12405 IPI00291928 | 38,8 | 38,8 IYQNIQDGSLLDLNAAESGVQHKPSAPQGGR   | 30 | 788,39  | 3149,54 |
| 11037 IPI00382869 | 41,8 | 41,8 LTVAVAFR                          | 8  | 438,77  | 875,52  |
| 7237 IPI00140827  | 38,4 | 38,4 VAGQDGSVVQFK                      | 12 | 617,82  | 1233,63 |
| 9844 IPI00007611  | 38,2 | 38,2 SFLSQGQVLK                        | 10 | 553,81  | 1105,61 |
| 29030 IPI00032406 | 38   | 38 LSELEDLLPSRPEVP(N)IIGETEEVELQEFDSTR | 33 | 1262,30 | 3783,87 |
| 20512 IPI00010153 | 38   | 38 ISLGLPVGAVINCADNTGAK                | 20 | 985,52  | 1969,03 |
| 10547 IPI00395769 | 37,8 | 37,8 THSDQFLVAFK                       | 11 | 431,56  | 1291,66 |
| 27615 IPI00006684 | 37,3 | 37,3 GTLGGFLFSQILQGEDIVR               | 18 | 952,02  | 1902,02 |
| 30570 IPI00154451 | 37,1 | 37,1 SGNYSVTLQVVVEALGSSLENPEPR         | 23 | 820,42  | 2458,23 |
| 15121 IPI00009507 | 36,9 | 36,9 TVTATFGYPFR                       | 11 | 630,32  | 1258,63 |
| 11735 IPI00012382 | 36,8 | 36,8 GQAFVIFK                          | 8  | 455,26  | 908,51  |
| 17547 IPI00479997 | 36,6 | 36,6 ASGQAFELILSPR                     | 13 | 694,88  | 1387,75 |

|                   |      |                                |    |        |         |
|-------------------|------|--------------------------------|----|--------|---------|
| 20392 IPI00301263 | 36,3 | 36,3 TLGVDLVALATR              | 12 | 614,87 | 1227,72 |
| 34296 IPI00018813 | 35,9 | 35,9 ELNIDVADVESLLVQCILDNTIHGR | 25 | 946,15 | 2835,44 |
| 16559 IPI00007764 | 35,9 | 35,9 VLRPPGGGSNFSLGFDEPTEQPVR  | 24 | 852,77 | 2555,28 |
| 12305 IPI00018352 | 35,9 | 35,9 LGFEDGSVLK                | 10 | 532,78 | 1063,55 |
| 23665 IPI00005102 | 35,7 | 35,7 GDCYQVLIEDCIPVLK          | 16 | 961,47 | 1920,93 |
| 6787 IPI00176662  | 35,7 | 35,7 DLLHPSPE(Q)EK             | 11 | 647,32 | 1292,62 |
| 19005 IPI00246058 | 35,7 | 35,7 SVIEQGGIQTVDQLIK          | 16 | 864,48 | 1726,95 |
| 18185 IPI00028376 | 35,6 | 35,6 FIDTSQFILNR               | 11 | 677,36 | 1352,71 |
| 11435 IPI00215790 | 35,6 | 35,6 DFLLTAR                   | 7  | 418,24 | 834,46  |
| 19347 IPI00022608 | 35,5 | 35,5 AS(N)LLLGFR               | 10 | 553,80 | 1105,58 |
| 12900 IPI00003406 | 35,5 | 35,5 LAASGEGGLQELSGHFENQK      | 20 | 691,34 | 2071,00 |
| 24618 IPI00328154 | 35,4 | 35,4 SGPFTHPDFEPSTESLQFLDTCCK  | 24 | 918,43 | 2752,27 |
| 16761 IPI00018783 | 34,4 | 34,4 LKPEGLHQLLAGFEDK          | 16 | 449,50 | 1793,97 |
| 6907 IPI00218251  | 34,2 | 34,2 SEGTYCCGPVPVR             | 13 | 741,33 | 1480,64 |
| 27565 IPI00384051 | 34,1 | 34,1 QNLFQEAEFLYR              | 13 | 843,91 | 1685,80 |
| 25715 IPI00384051 | 31,6 | 31,6 AFYAELYHISSNLEK           | 16 | 633,33 | 1896,96 |
| 4238 IPI00005162  | 34,1 | 34,1 PAYHSSL(M)DPDTK           | 13 | 493,23 | 1476,66 |
| 17417 IPI00291510 | 33,4 | 33,4 NLIDAGVDALR               | 11 | 578,82 | 1155,62 |
| 18992 IPI00026054 | 33,3 | 33,3 ARALEAAALAH               | 11 | 547,30 | 1092,59 |
| 8339 IPI00029012  | 32,9 | 32,9 ANEFLEVGK                 | 9  | 503,77 | 1005,52 |
| 20197 IPI00184848 | 32,9 | 32,9 SL(N)I(Q)WLR              | 8  | 516,28 | 1030,55 |
| 12980 IPI00640372 | 32,4 | 32,4 FGIYDIDNK                 | 9  | 542,77 | 1083,52 |
| 20245 IPI00017799 | 32,4 | 32,4 FVGKDEDQLEAFLK            | 15 | 584,65 | 1750,91 |
| 7802 IPI00219160  | 32,3 | 32,3 AFLIEEQK                  | 8  | 489,27 | 976,52  |
| 25950 IPI00007928 | 32,6 | 32,6 TEDPDLPAFYFDPLINPISHR     | 21 | 819,74 | 2456,20 |
| 10191 IPI00179953 | 34,8 | 34,8 KPTDGASSNCVTDISHLVR       | 20 | 715,35 | 2143,03 |
| 12605 IPI00645194 | 31,4 | 31,4 IGFGSFVEK                 | 9  | 492,26 | 982,51  |
| 9634 IPI00465102  | 31,2 | 31,2 GEL(Q)LIK                 | 7  | 401,24 | 800,46  |
| 34376 IPI00012998 | 31,2 | 31,2 AVSDASAGDYGSAIETLVTAISLIK | 25 | 818,10 | 2451,27 |
| 30378 IPI00385153 | 30,3 | 30,3 DPSQVENLASSLQLITECFR      | 20 | 769,71 | 2306,12 |
| 18805 IPI00012341 | 31,1 | 31,1 GFGFVEFEDPR               | 11 | 650,30 | 1298,59 |
| 7057 IPI00719633  | 31   | 31 FSSVQLR                     | 7  | 418,73 | 835,46  |

|                   |      |                                           |    |        |         |
|-------------------|------|-------------------------------------------|----|--------|---------|
| 8616 IPI00029133  | 31   | 31 HYLFDVQR                               | 8  | 539,28 | 1076,54 |
| 9346 IPI00029740  | 30,9 | 30,9 TNLPIFK                              | 7  | 416,75 | 831,49  |
| 5668 IPI00293350  | 30,9 | 30,9 SF(Q)QELDAR                          | 9  | 547,76 | 1093,50 |
| 30493 IPI00001890 | 30,7 | 30,7 AIVDCIISIIEENSESK                    | 17 | 640,66 | 1918,95 |
| 13805 IPI00022462 | 30,5 | 30,5 SSGLPNIPVQTISR                       | 14 | 734,91 | 1467,80 |
| 11605 IPI00012493 | 30,1 | 30,1 LIDLHSPSEIVK                         | 12 | 450,93 | 1349,75 |
| 14334 IPI00019770 | 29,1 | 29,1 FVNVVPTFGK                           | 10 | 554,31 | 1106,61 |
| 23955 IPI00024989 | 29,9 | 29,9 (M)GYAEEAPYDAIHVGAAAPVVPQALIDQLKPGGR | 34 | 880,95 | 3519,78 |
| 21890 IPI00160021 | 29,4 | 29,4 SVFFGPDFITVTK                        | 13 | 729,39 | 1456,76 |
