# Supplementary material
Source: PubMed Central journal article supplement (PMC2689776)

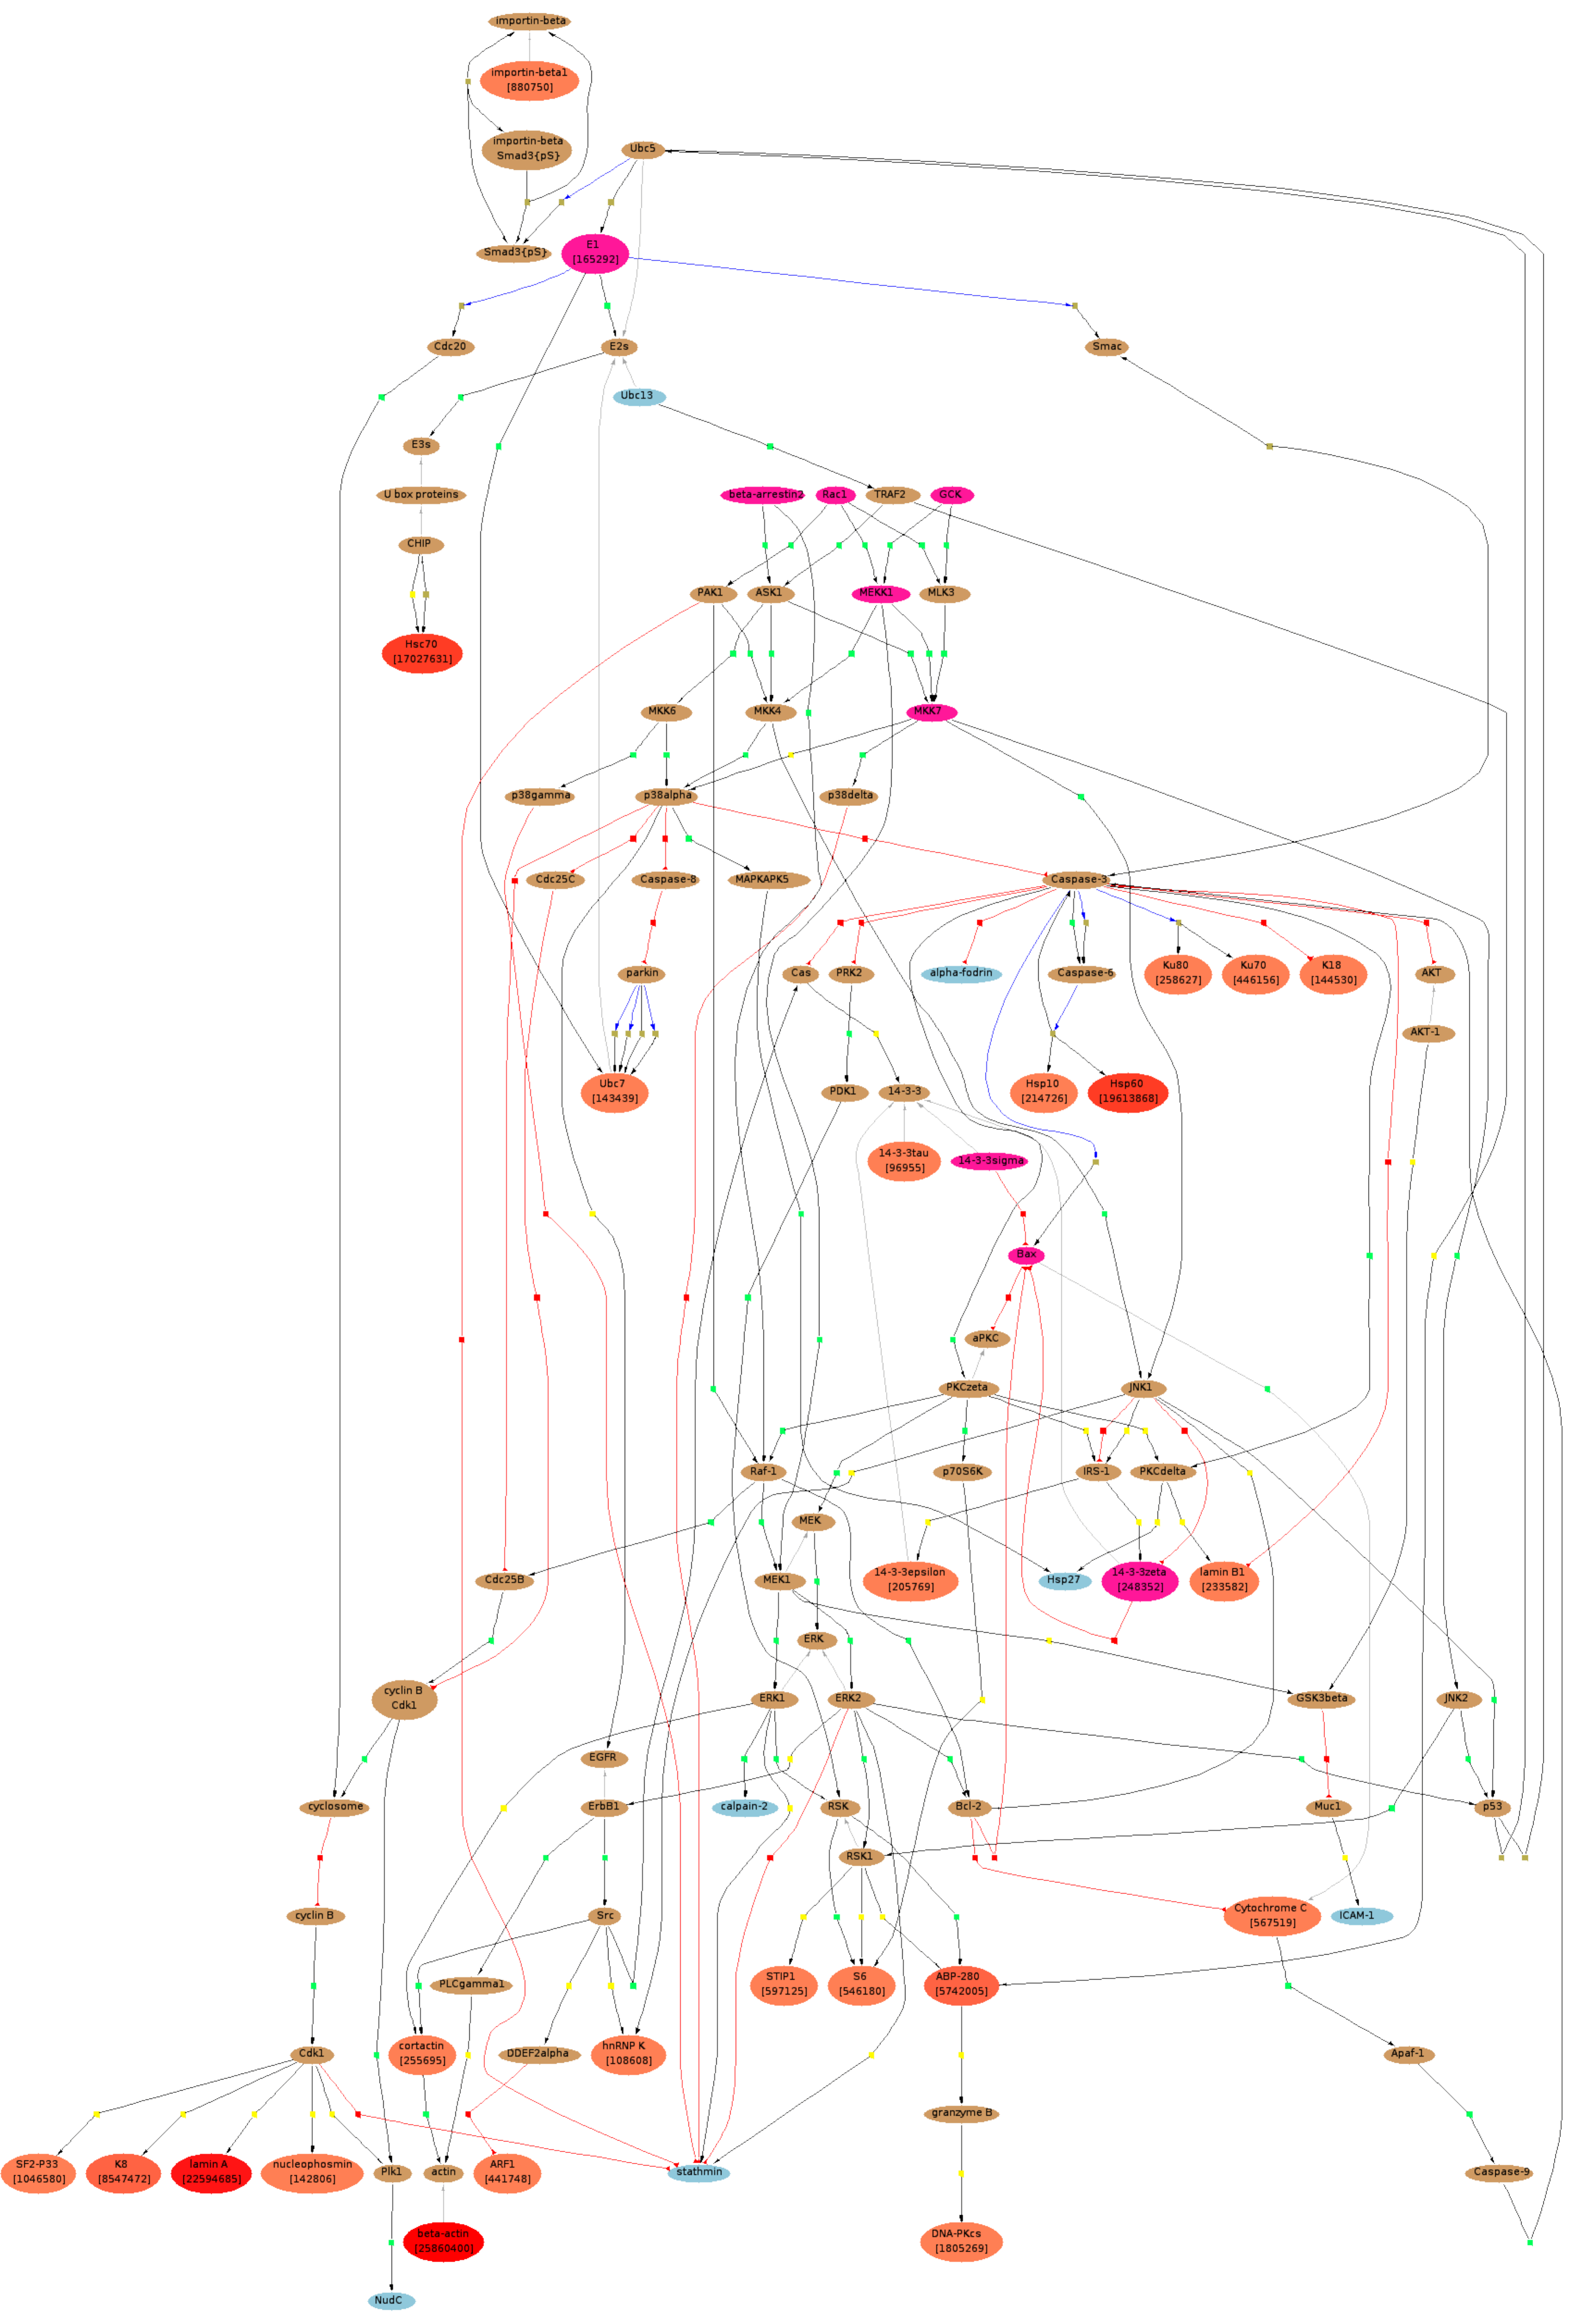

Fas-pathway

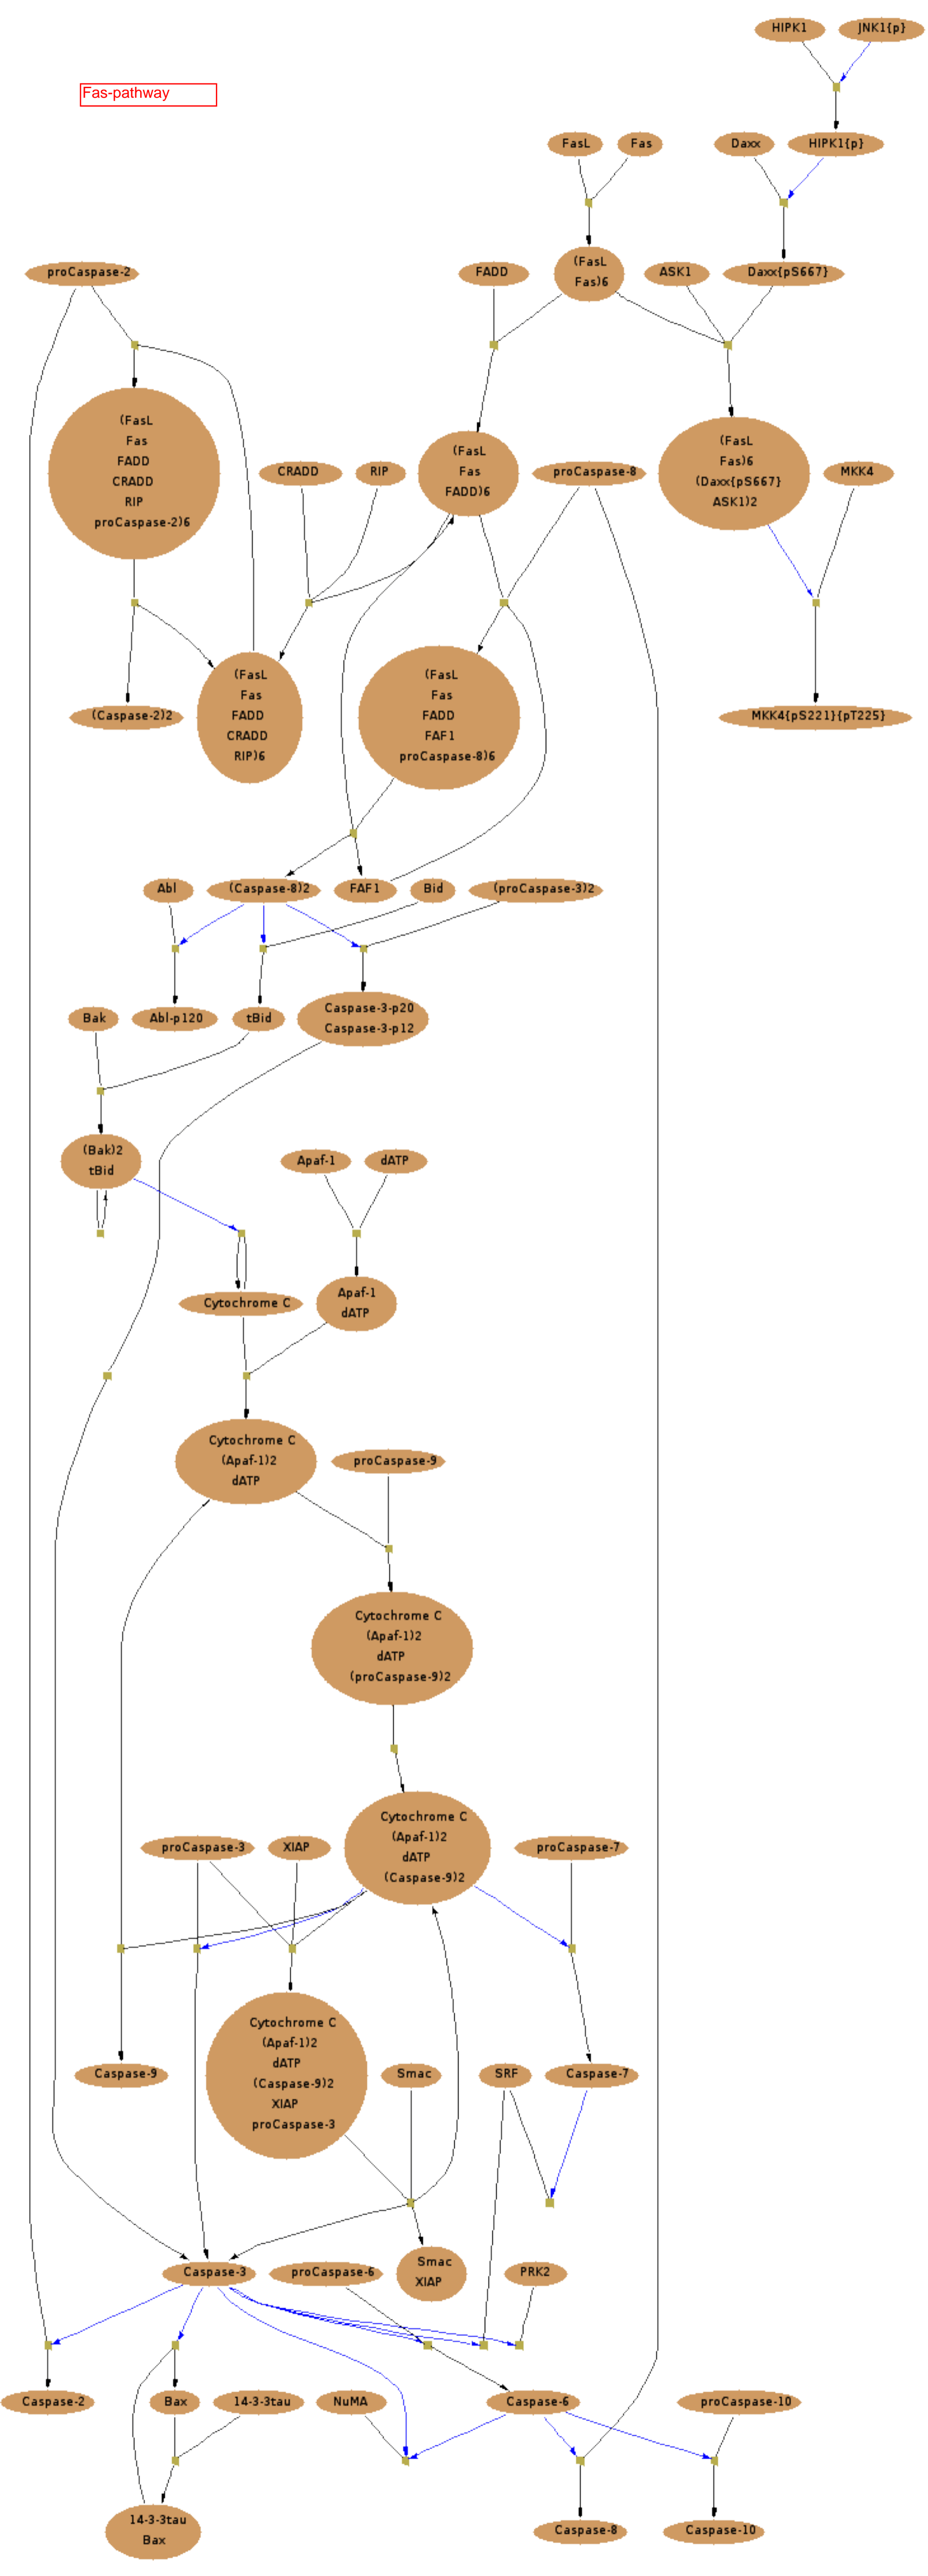



p38-pathway

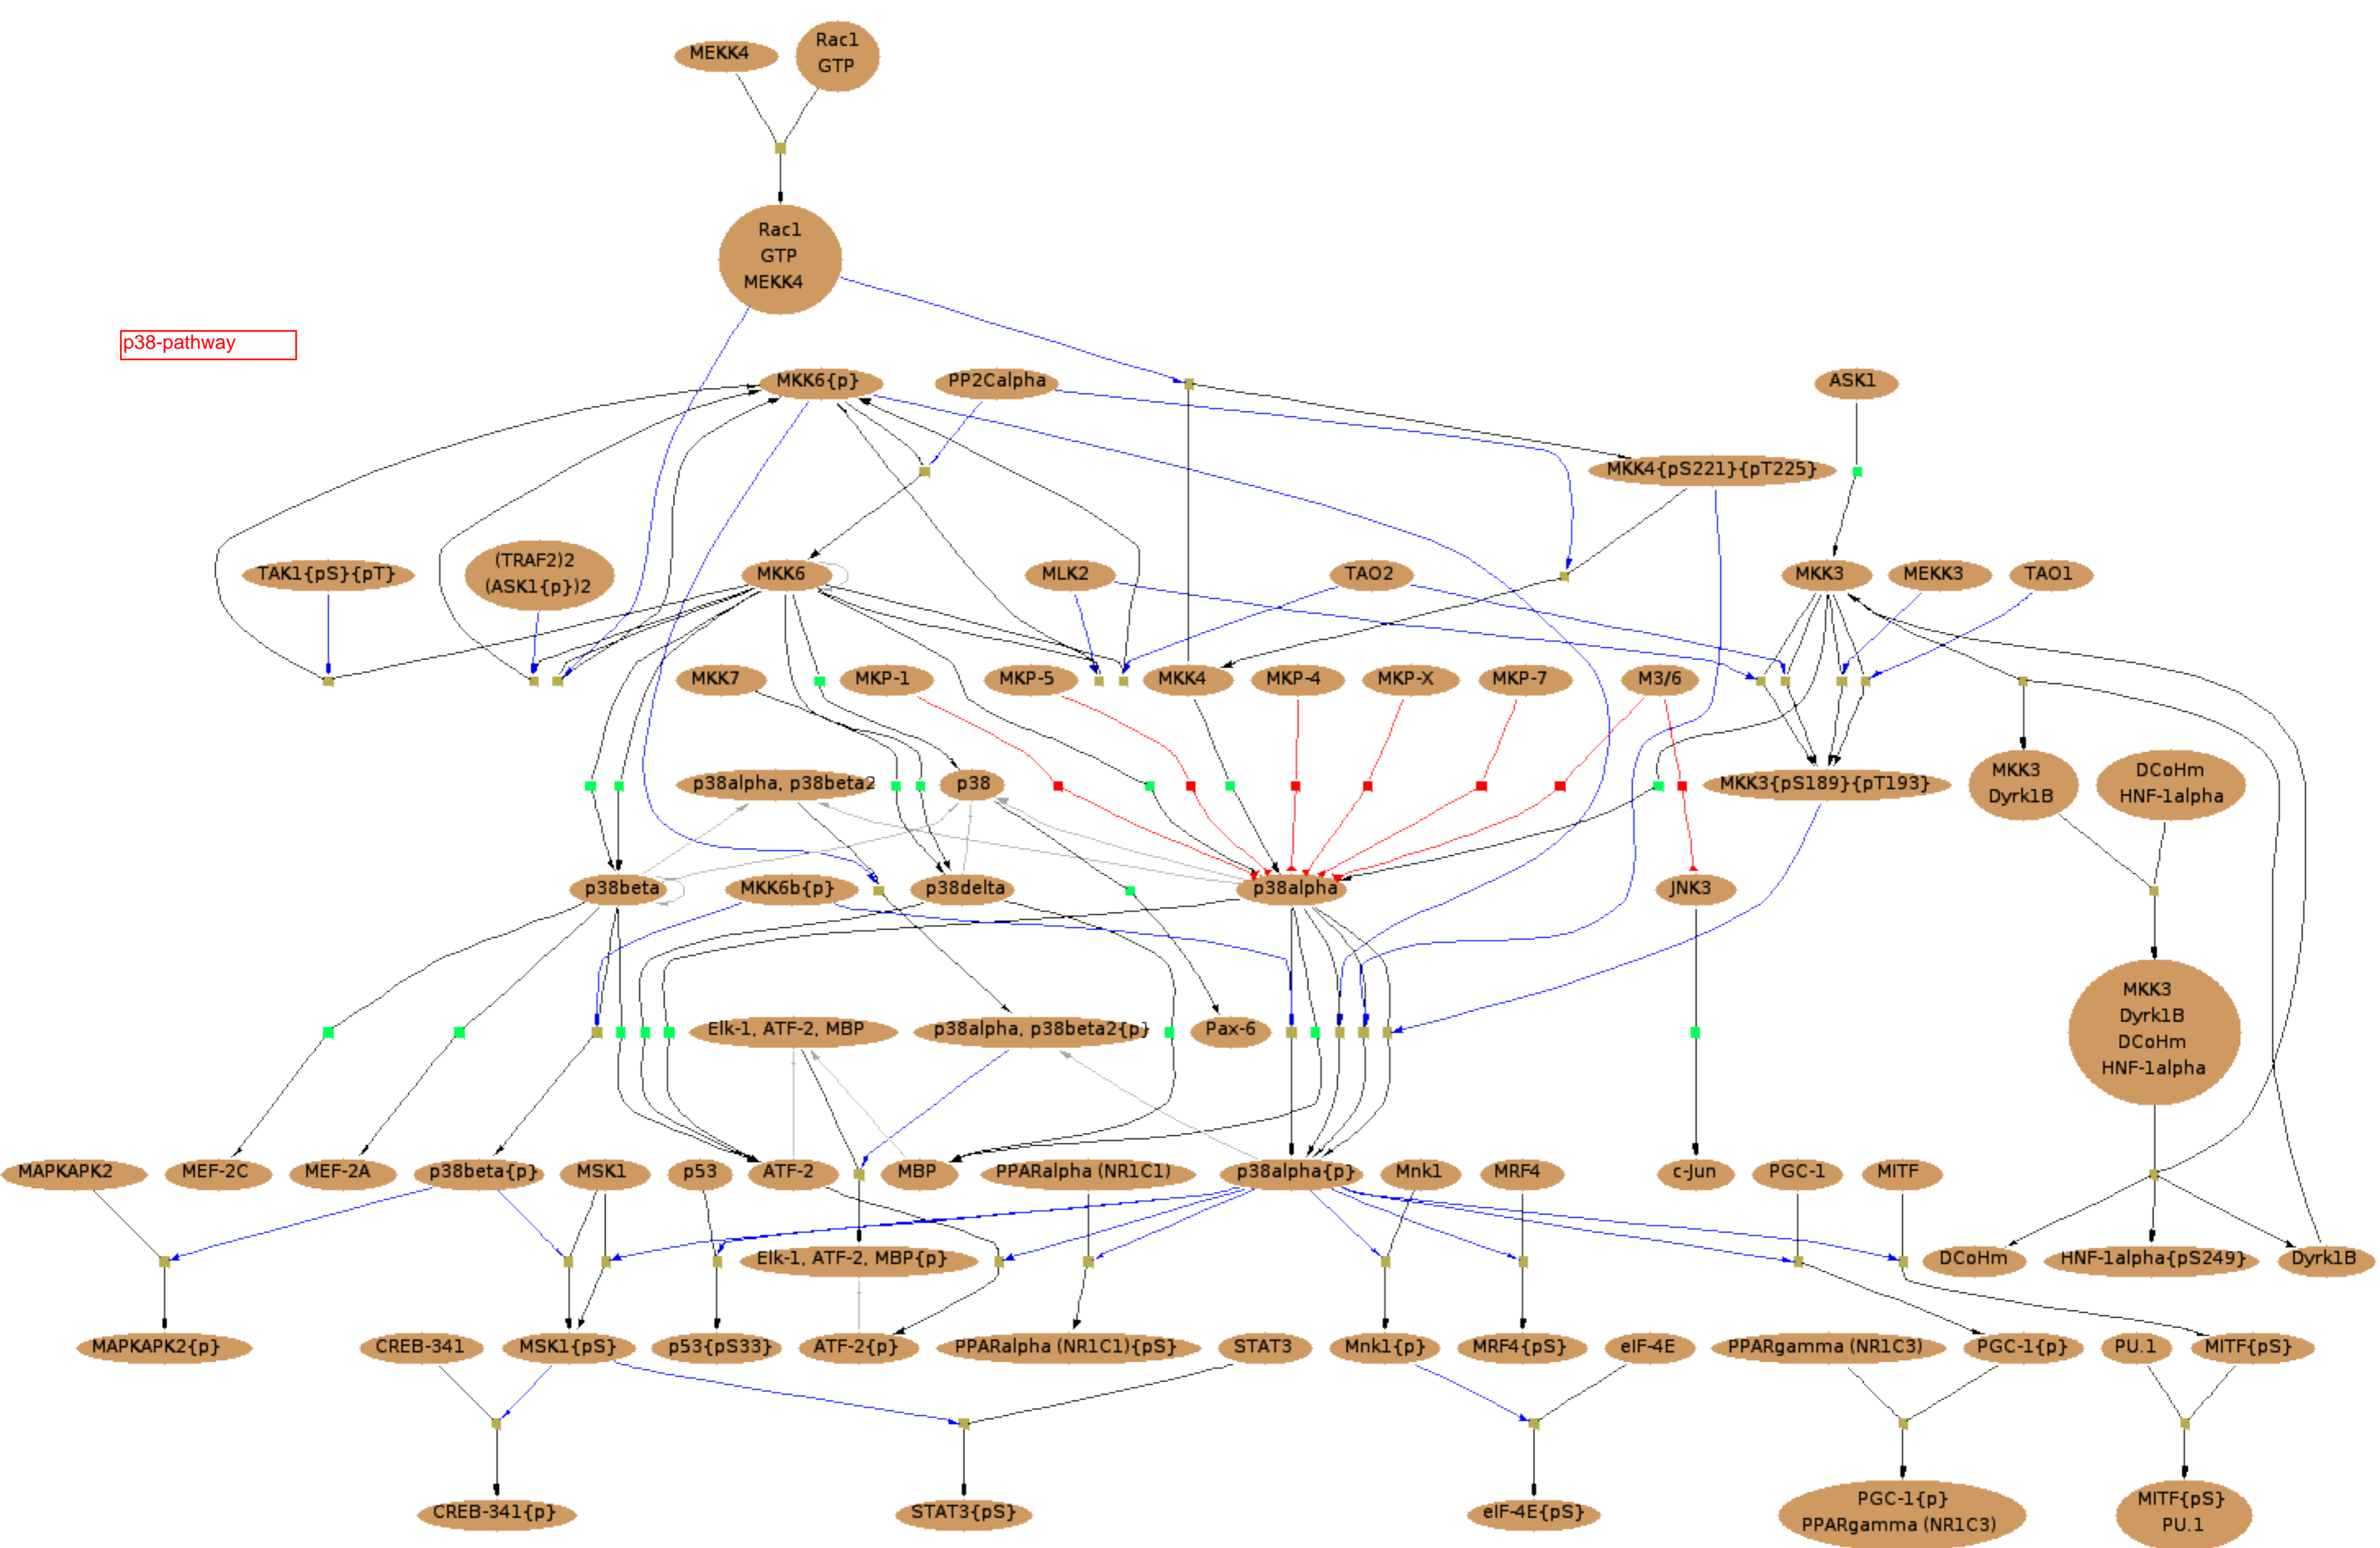

Supplement: M800274-MCP200_1.pdf [file M800274-MCP200_1.pdf]
